# Supplementary material for: Unveiling the functional fate of duplicated genes through expression profiling and structural analysis
Source: HighWire-hosted journal article supplement (doi:10.1101/gr.280166.124), 2025-08-14
Supplement: Supplemental_Fig_S2.pdf [file Supplemental_Fig_S2.pdf]

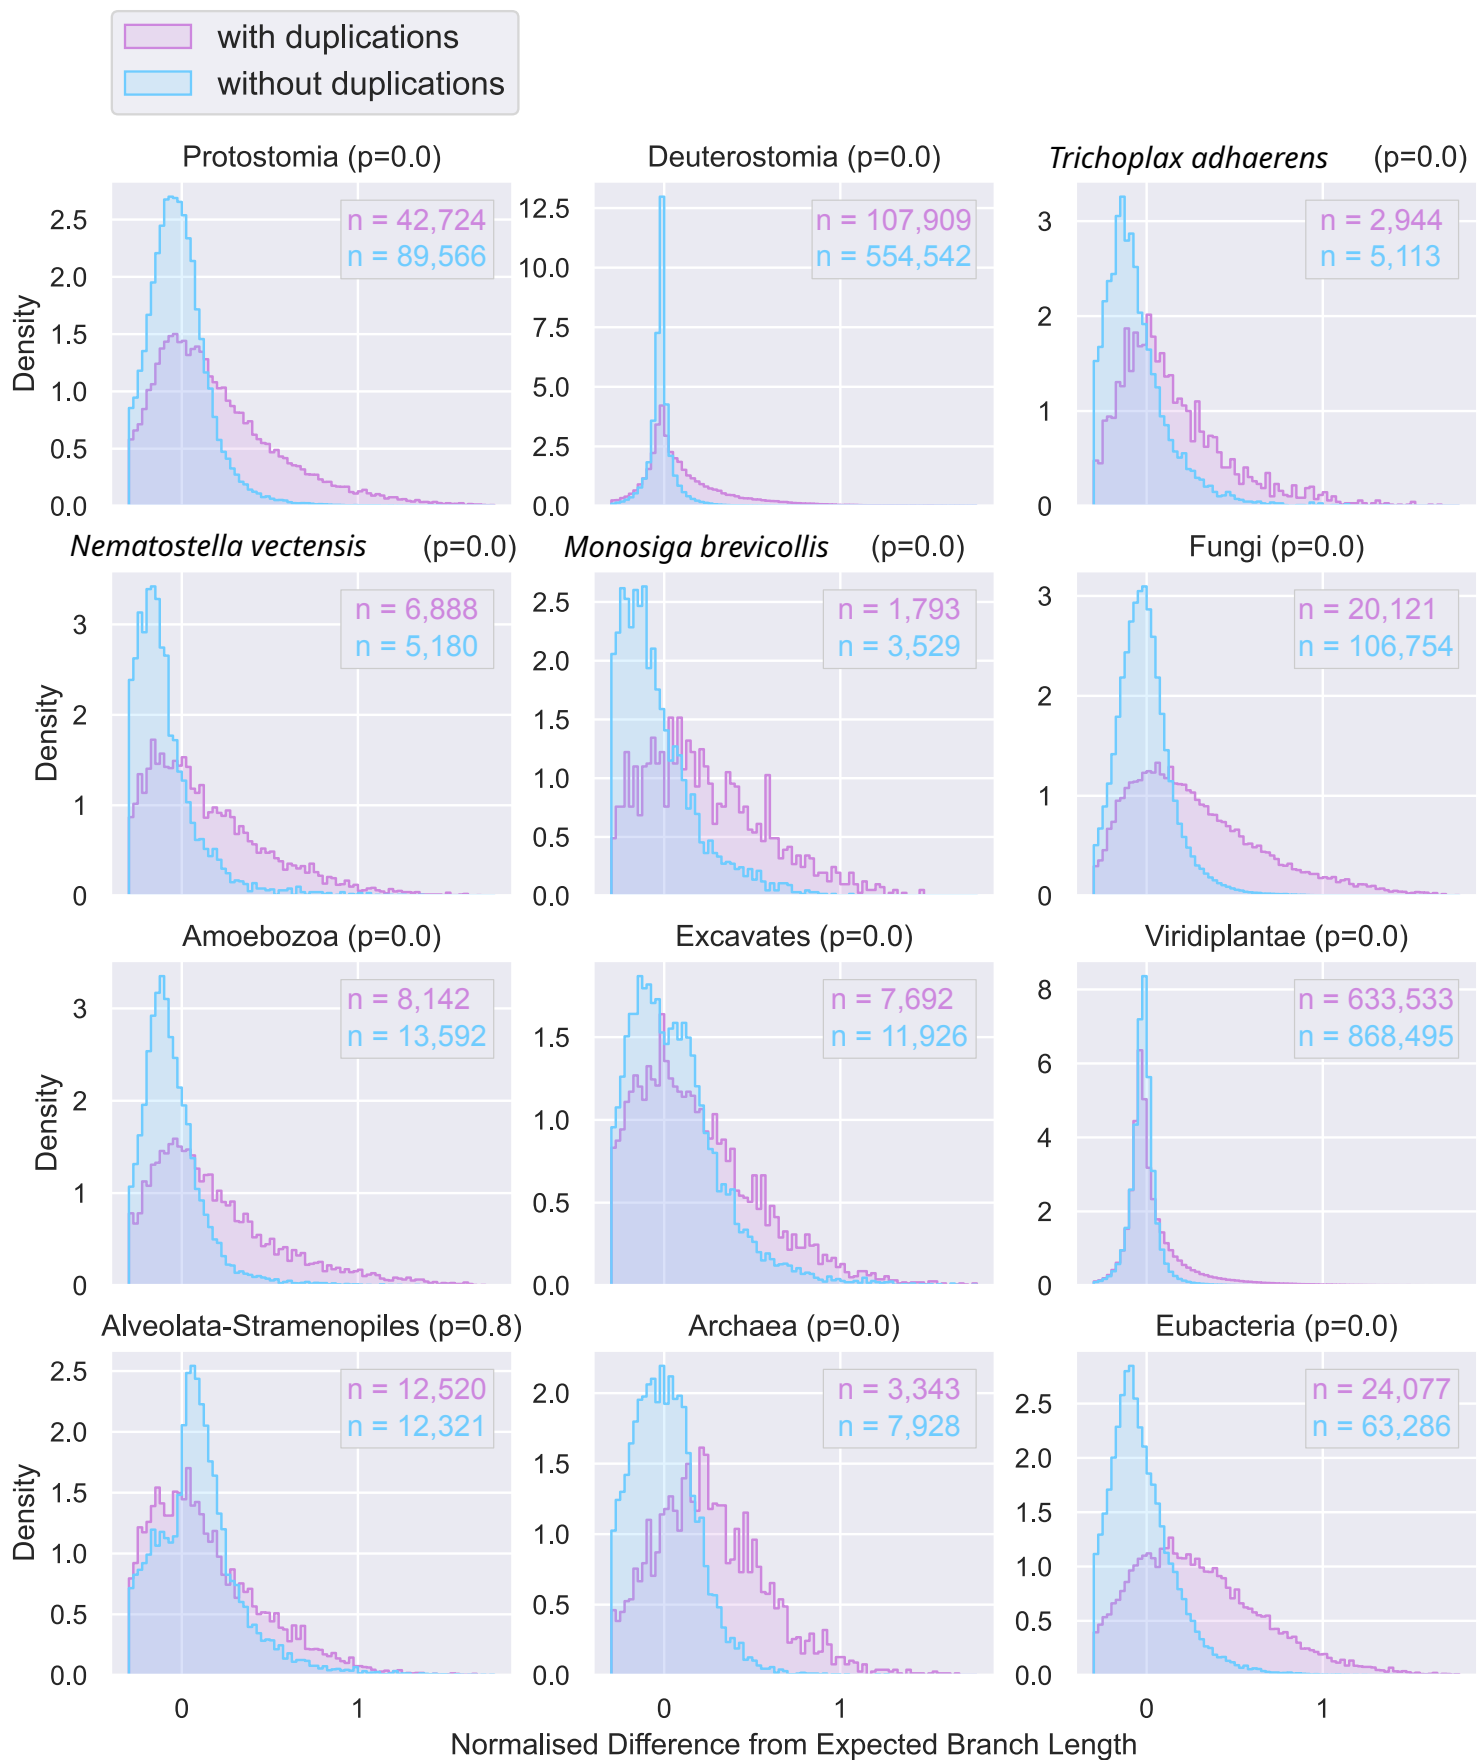

**Supplemental Fig. S2.** Distributions of the differences between observed gene tree branch lengths and expected branch lengths, with duplications in pink and without duplications in light blue for each major lineage. The p-values for the Mann–Whitney U test are shown in parentheses. The sample sizes (n) are also indicated in each plot.
