# Supplementary material for: Unveiling the functional fate of duplicated genes through expression profiling and structural analysis
Source: HighWire-hosted journal article supplement (doi:10.1101/gr.280166.124), 2025-08-14
Supplement: Supplemental_Fig_S3.pdf [file Supplemental_Fig_S3.pdf]

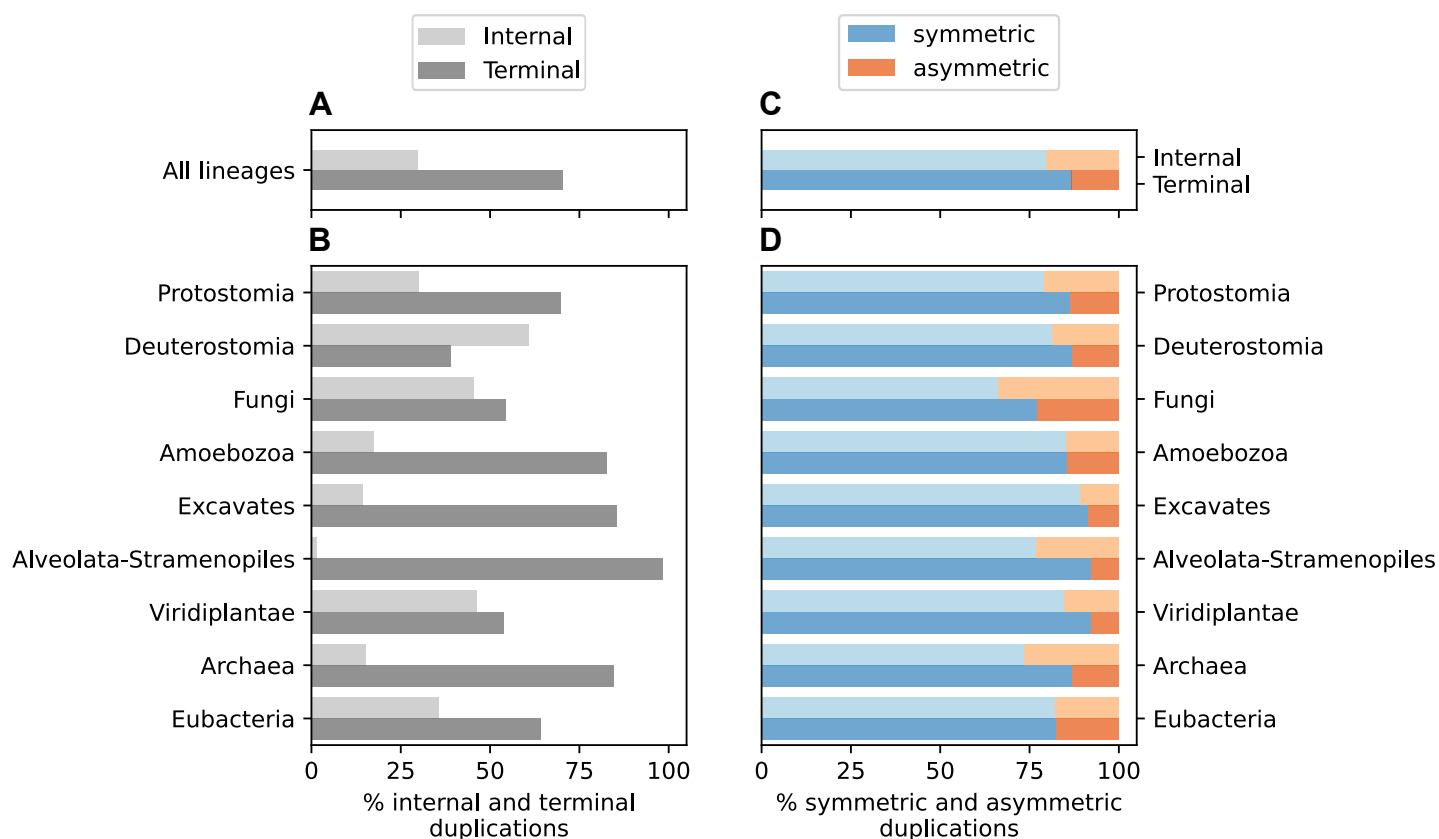

**Supplemental Fig. S3.** Distribution of duplications across lineages and categories. **(A)** Average percentage of duplications across all lineages. Internal branches are shown in light grey and terminal branches in dark grey. **(B)** Percentage of duplications in internal (light grey) and terminal (dark grey) branches per lineage. **(C)** Average percentage of symmetric (orange) and asymmetric (blue) duplications for internal (light colours) and terminal (dark colours) branches. The percentages are calculated independently per internal and terminal branches. **(D)** Percentage of asymmetric and symmetric duplications in terminal and internal branches per lineage.
