# Supplementary material for: Unveiling the functional fate of duplicated genes through expression profiling and structural analysis
Source: HighWire-hosted journal article supplement (doi:10.1101/gr.280166.124), 2025-08-14
Supplement: Supplemental_Fig_S5.pdf [file Supplemental_Fig_S5.pdf]

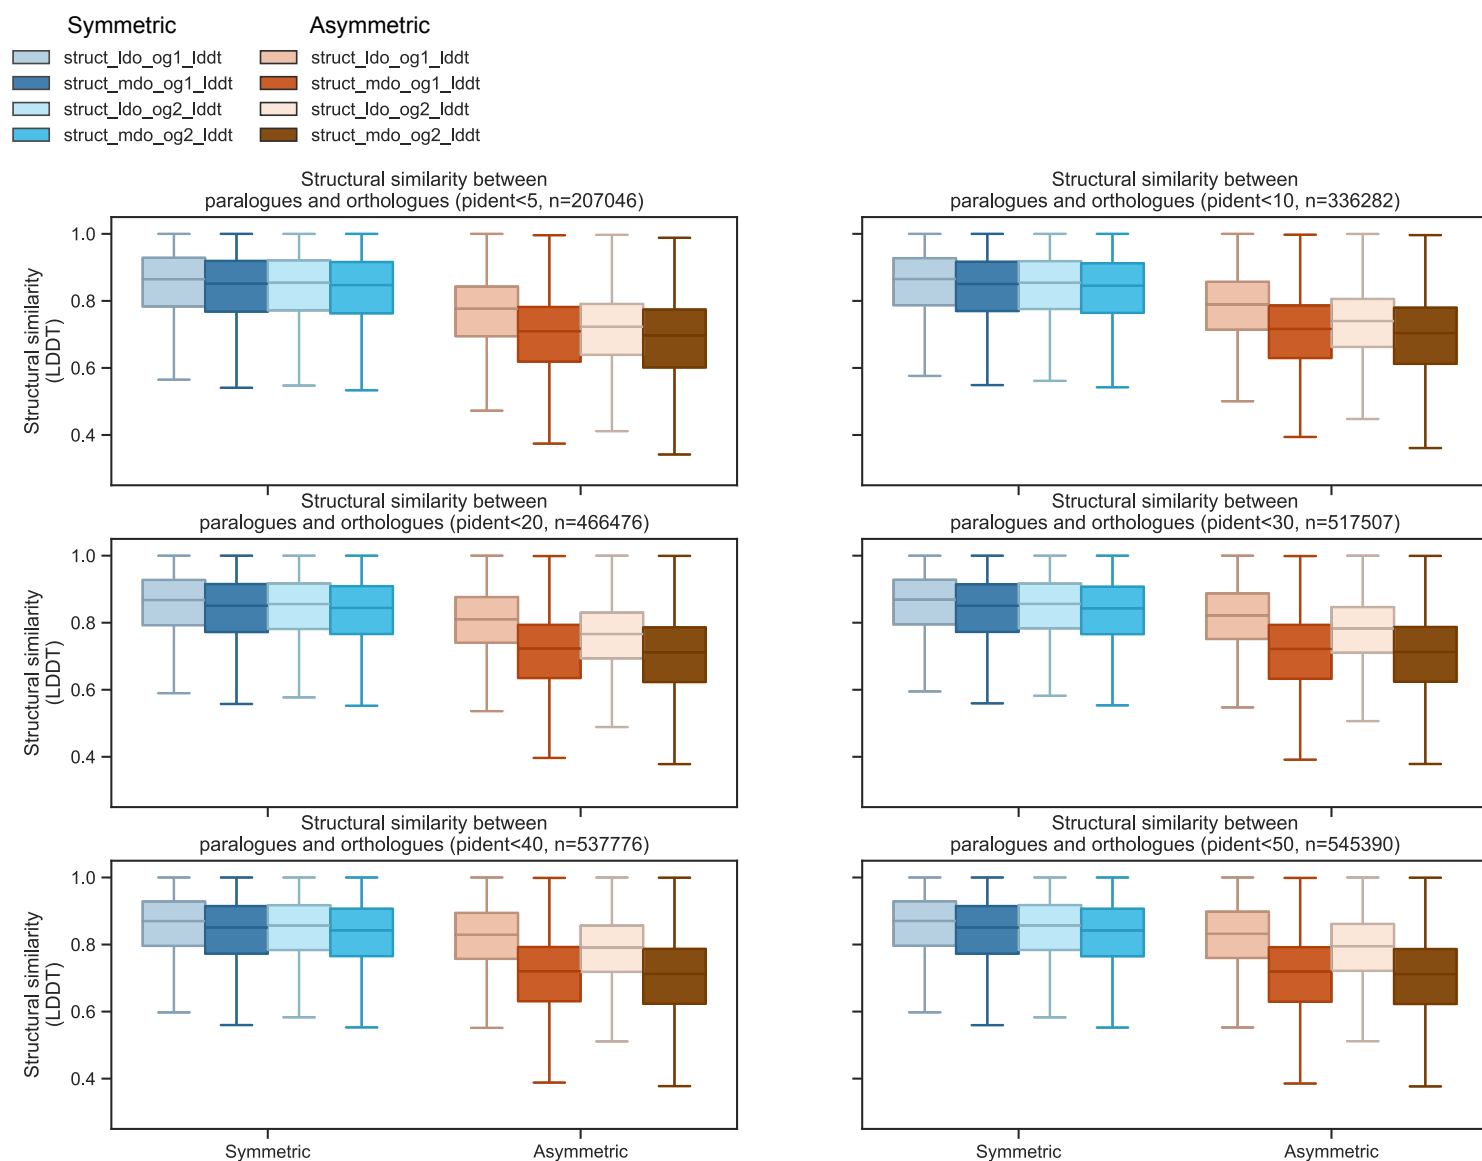

**Supplemental Fig. S5.** Structural similarity of each paralogue to two different orthologues (og1 and og2). Box colours correspond to the comparisons made. Each subplot shows the comparisons made using different thresholds for the difference in percentage of sequence identity (pident).
