# Supplementary material for: Unveiling the functional fate of duplicated genes through expression profiling and structural analysis
Source: HighWire-hosted journal article supplement (doi:10.1101/gr.280166.124), 2025-08-14
Supplement: Supplemental_Fig_S6.pdf [file Supplemental_Fig_S6.pdf]

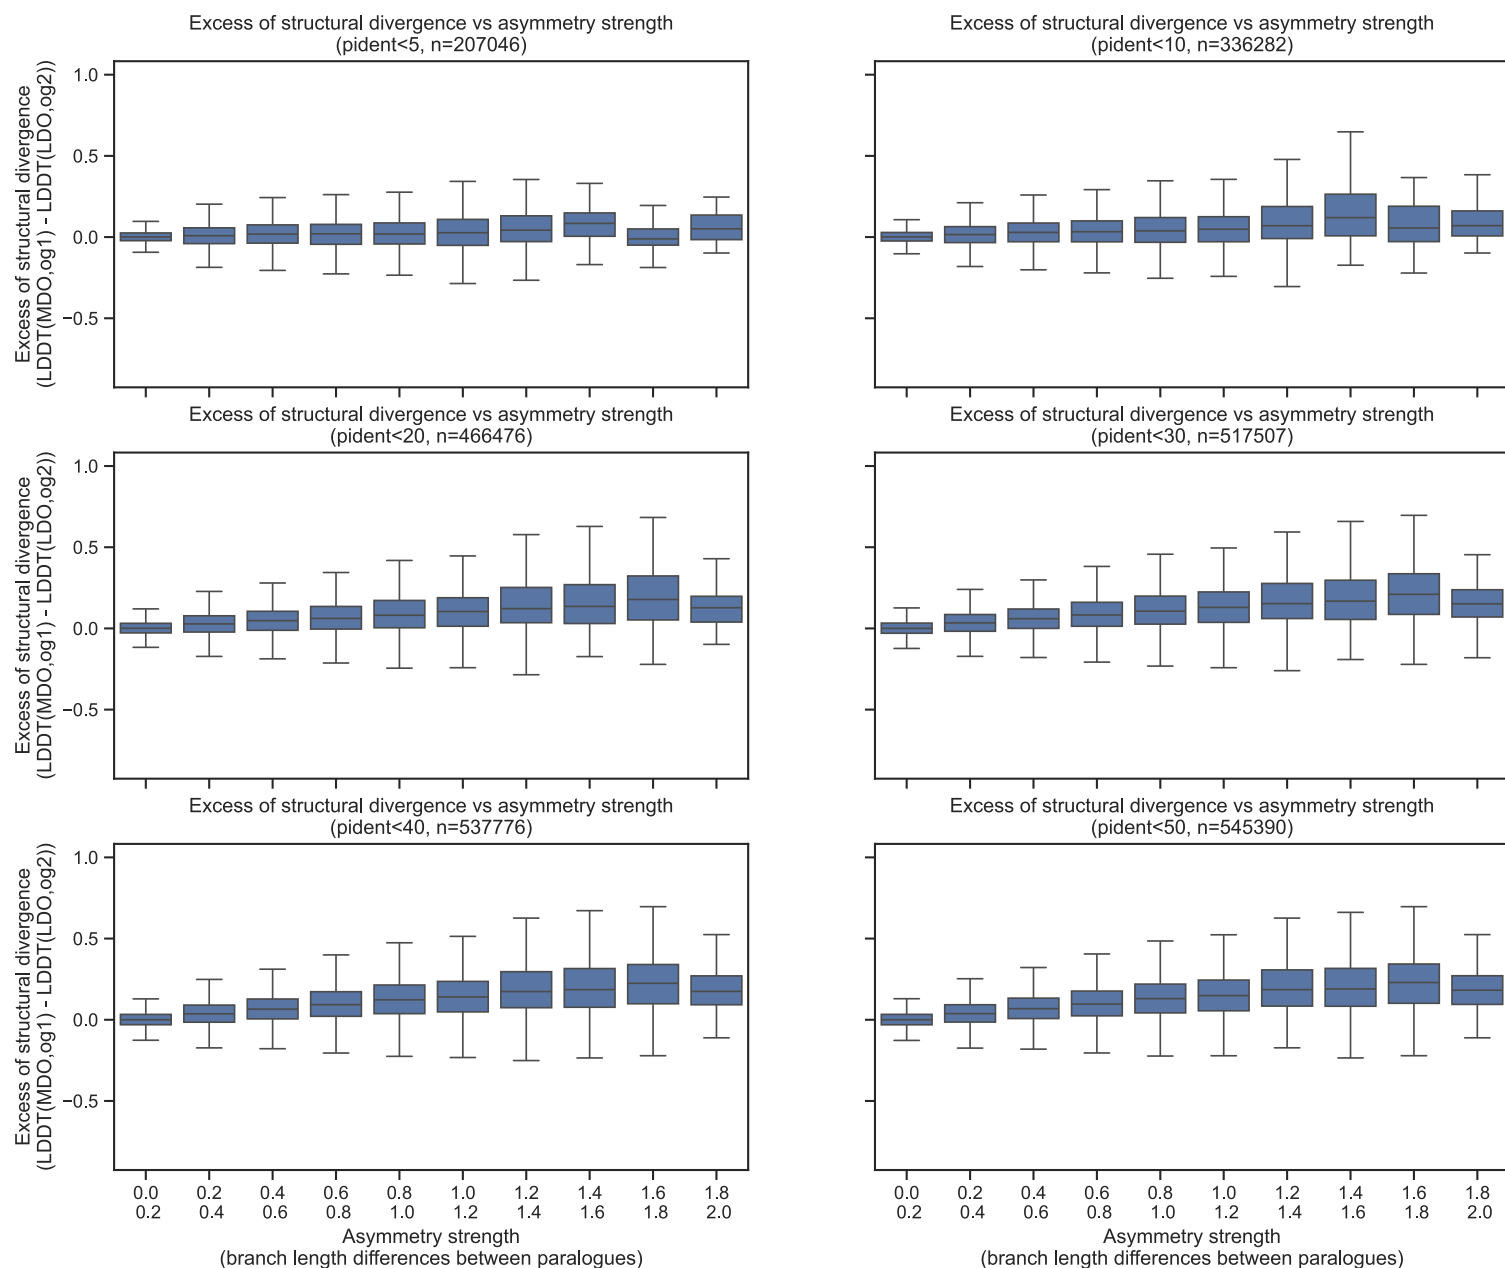

**Supplemental Fig. S6.** Comparison between the excess of structural divergence and asymmetry strength. The x-axis represents increasing bins of asymmetry strength. Each subplot shows the comparisons made using different thresholds for the difference in percentage of sequence identity (pident).
