# Supplementary material for: Unveiling the functional fate of duplicated genes through expression profiling and structural analysis
Source: HighWire-hosted journal article supplement (doi:10.1101/gr.280166.124), 2025-08-14
Supplement: Supplemental_Fig_S7.pdf [file Supplemental_Fig_S7.pdf]

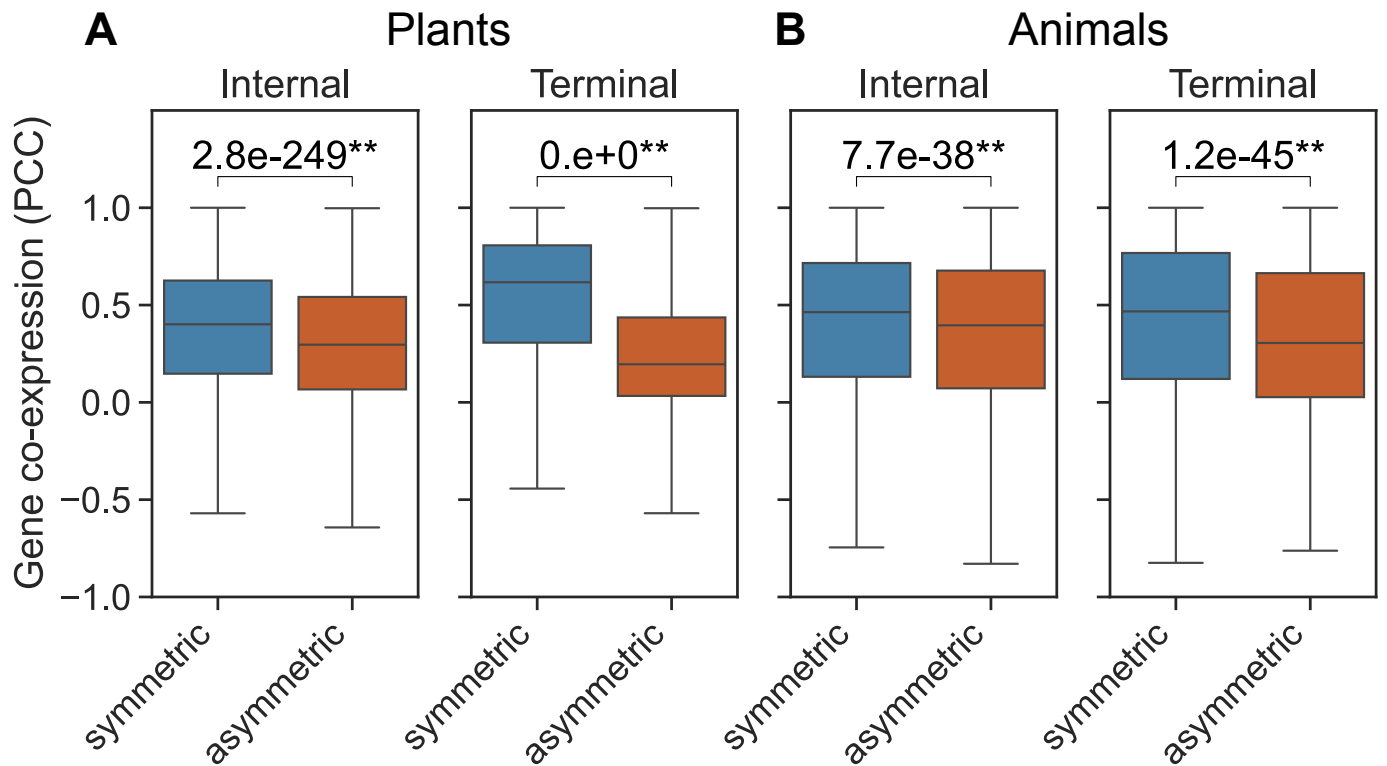

**Supplemental Fig. S7.** Comparison of expression profiles between paralogues in internal and terminal gene tree branches following symmetric and asymmetric duplications. **(A)** Pearson's Correlation Coefficient (PCC) between the expression profiles of paralogues in plants. **(B)** Pearson's Correlation Coefficient (PCC) between the expression profiles of paralogues in animals. The number on the top of the figures indicates the p-values for the Mann–Whitney U test (\*  $p < 0.05$  and \*\*  $p < 0.01$ ).
