# Supplementary material for: Unveiling the functional fate of duplicated genes through expression profiling and structural analysis
Source: HighWire-hosted journal article supplement (doi:10.1101/gr.280166.124), 2025-08-14
Supplement: Supplemental_Fig_S9.pdf [file Supplemental_Fig_S9.pdf]

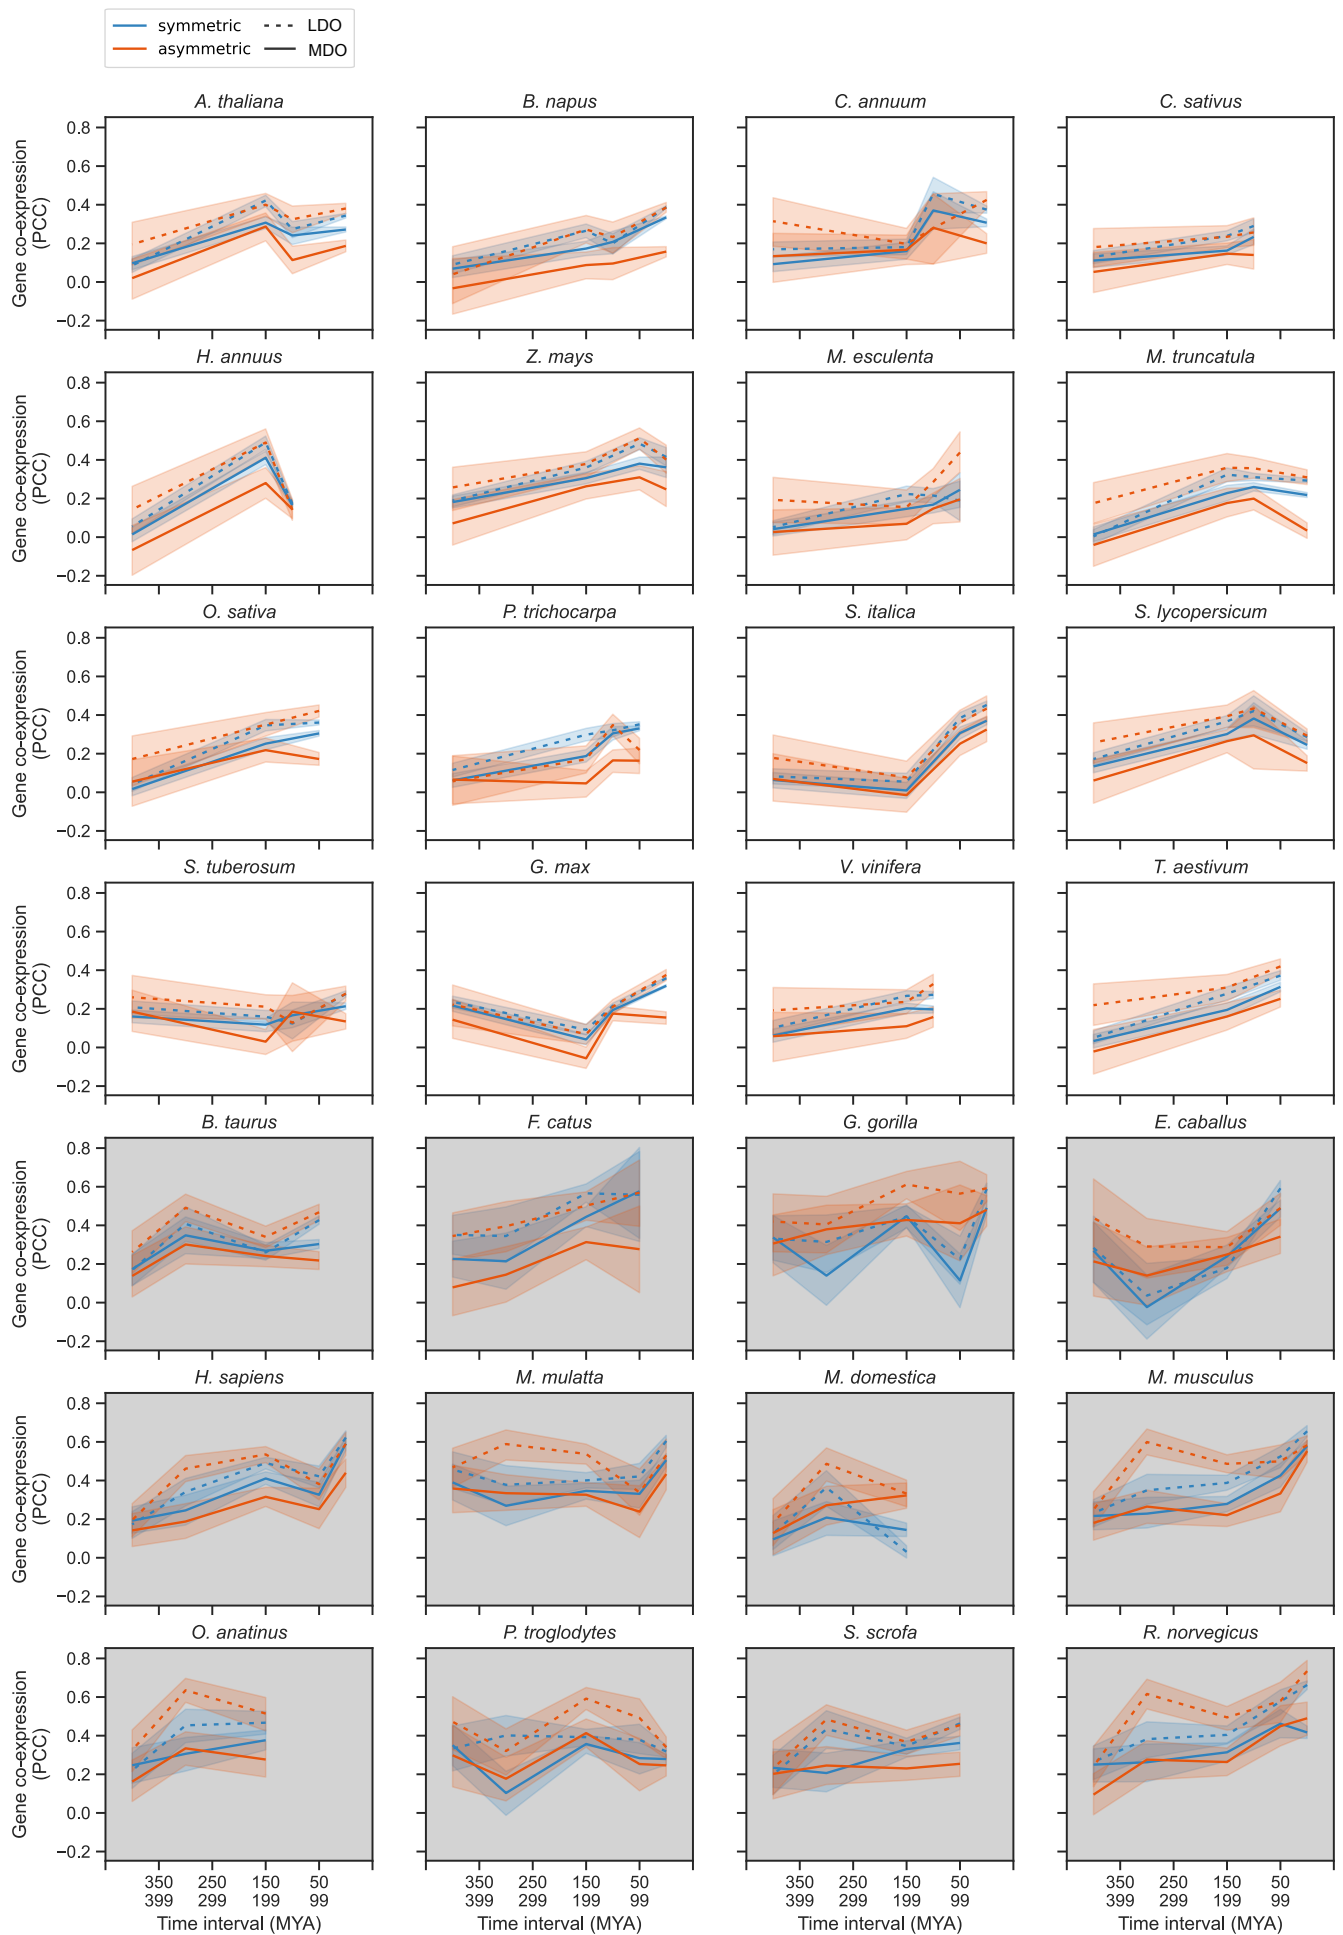

**Supplemental Fig. S9.** Variation of the Pearson's Correlation Coefficient between the expression profiles of the closest orthologues and the LDO (dashed lines) and MDO (solid lines) genes following symmetric (blue) and asymmetric (orange) duplications. The x-axis indicates the divergence time between the species compared in time intervals. Plants are shown on a white background, and animals are presented on a grey background.
