# Supplementary material for: Unveiling the functional fate of duplicated genes through expression profiling and structural analysis
Source: HighWire-hosted journal article supplement (doi:10.1101/gr.280166.124), 2025-08-14
Supplement: Supplemental_Fig_S10.pdf [file Supplemental_Fig_S10.pdf]

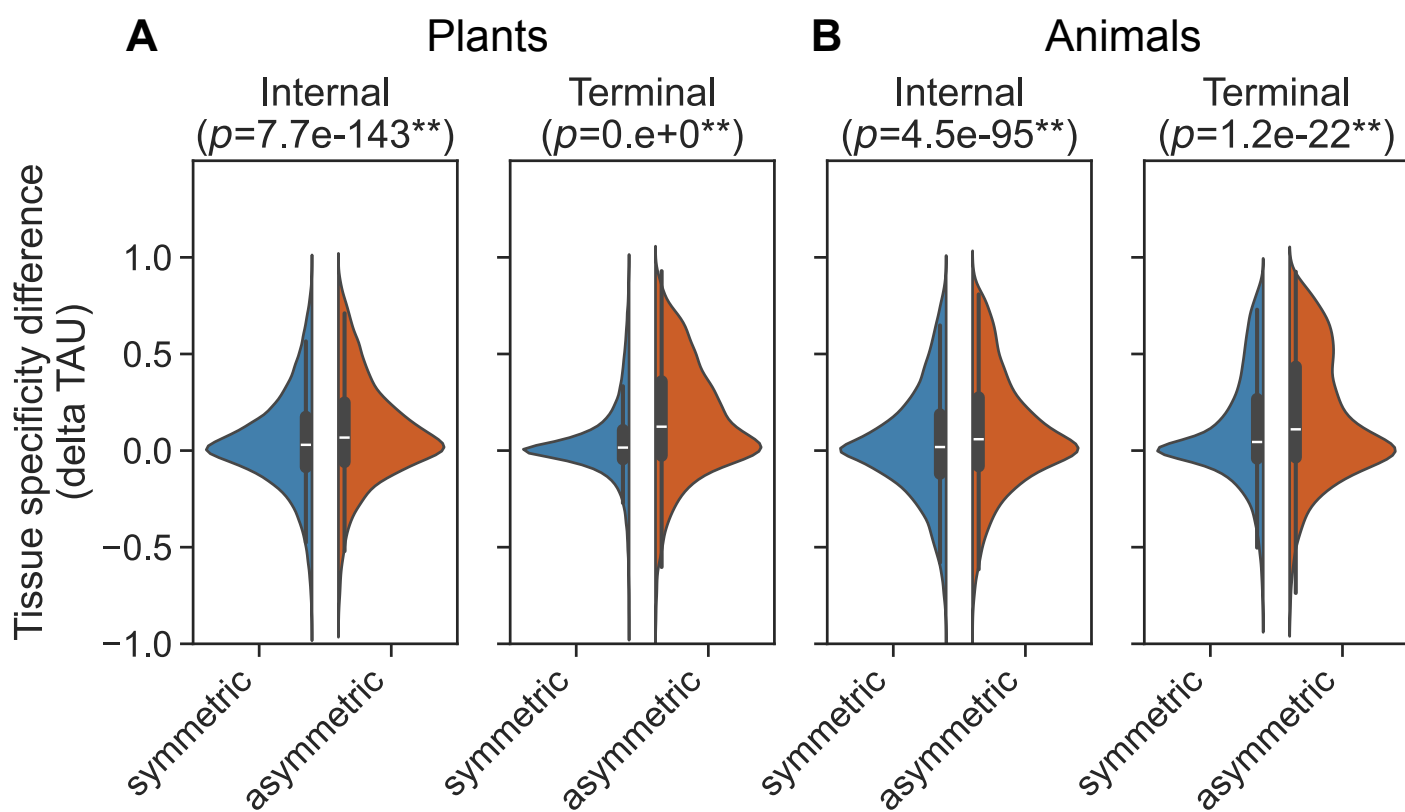

**Supplemental Fig. S10.** Violin plots showing the delta TAU distribution of paralogues following symmetric and asymmetric duplications. Plants (**A**) and animals (**B**) were analysed separately.
