# Supplementary material for: Unveiling the functional fate of duplicated genes through expression profiling and structural analysis
Source: HighWire-hosted journal article supplement (doi:10.1101/gr.280166.124), 2025-08-14
Supplement: Supplemental_Fig_S11.pdf [file Supplemental_Fig_S11.pdf]

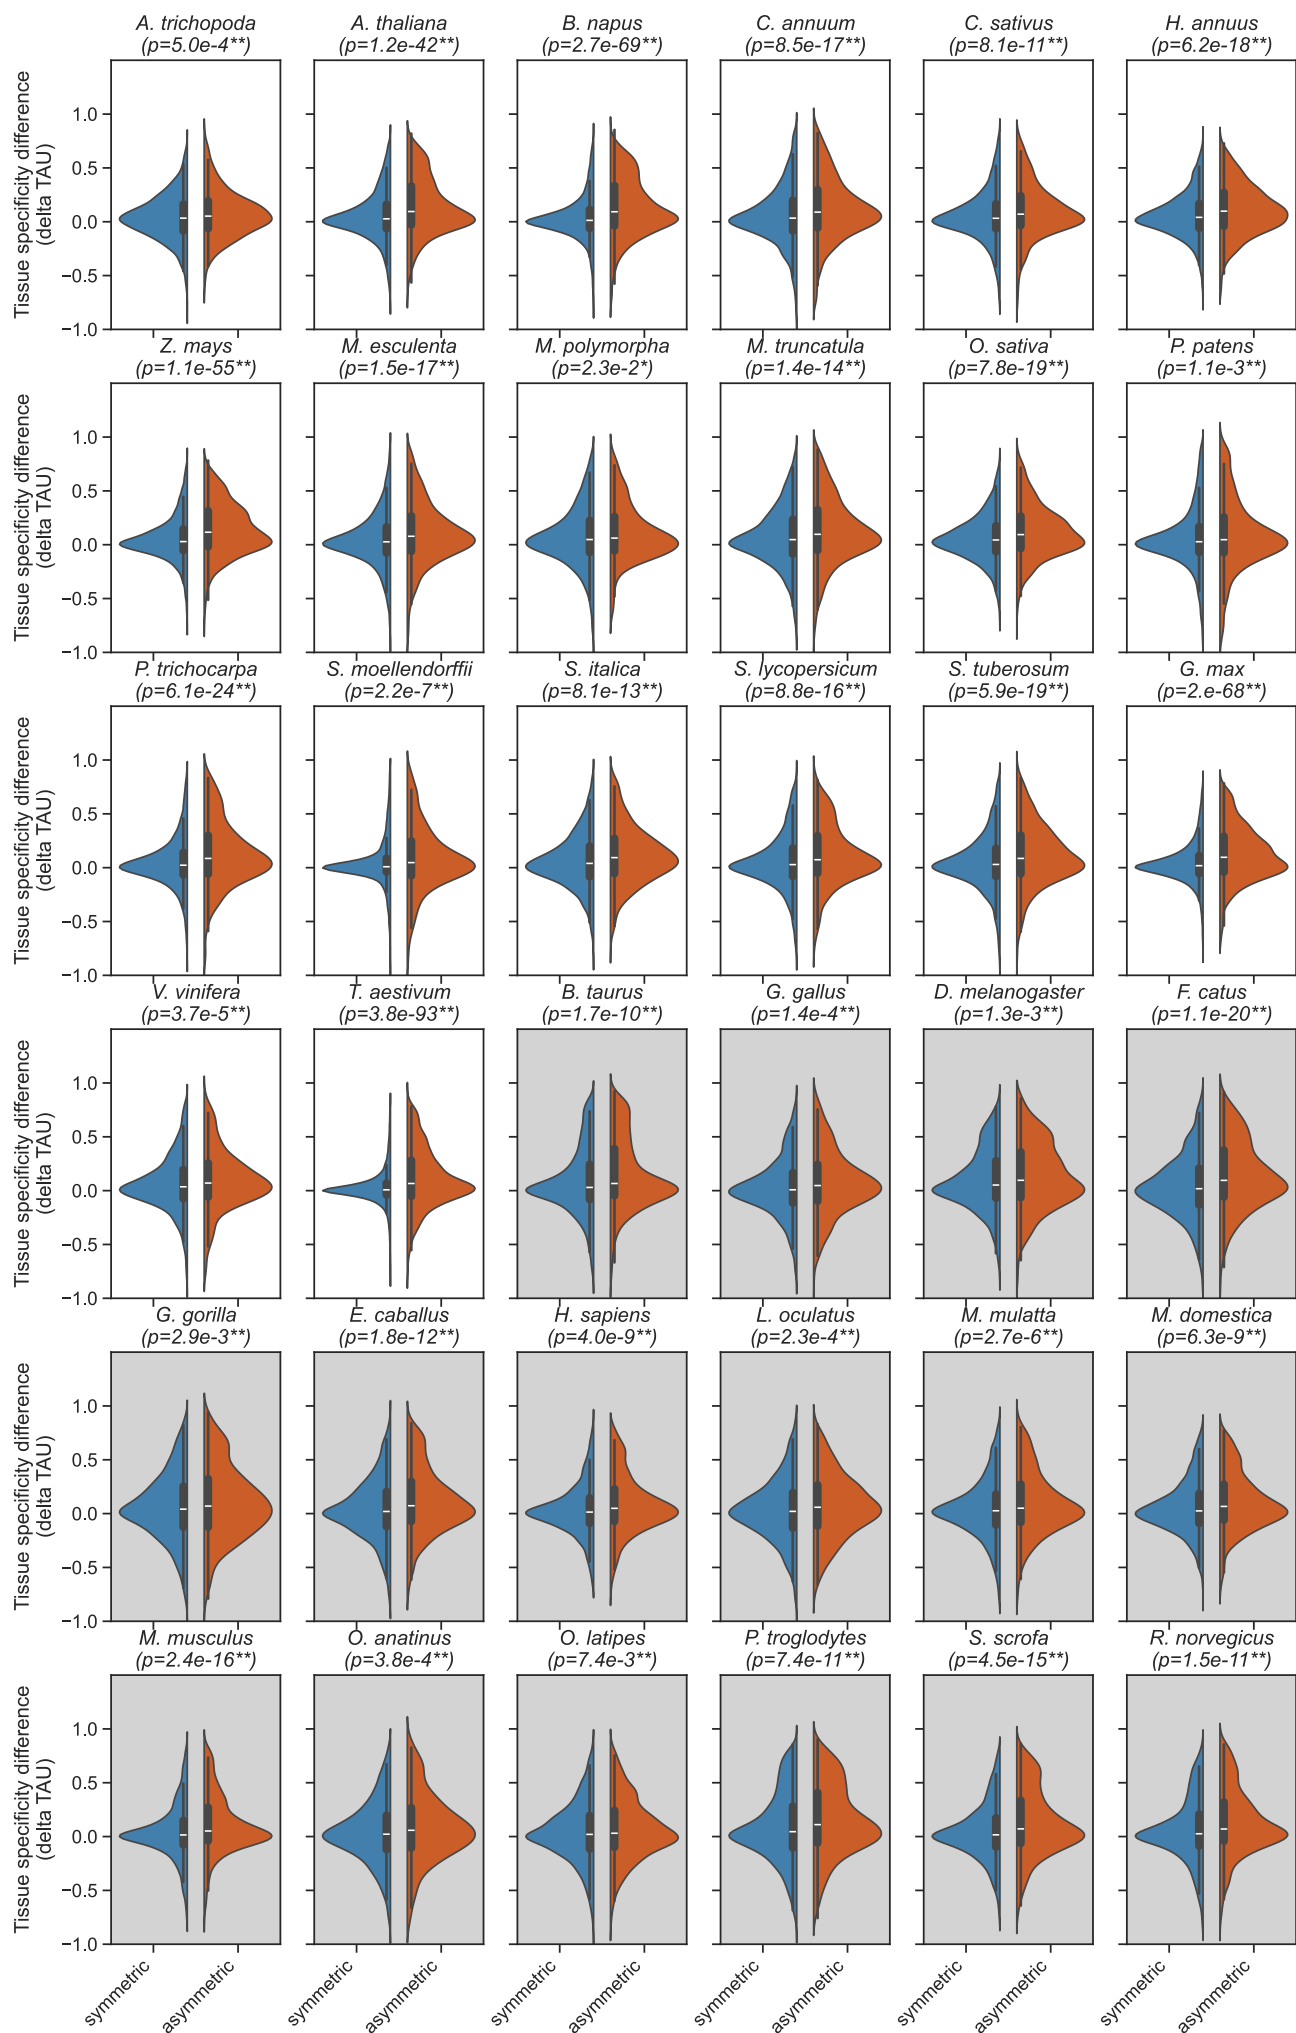

**Supplemental Fig. S11.** Violin plots showing the delta TAU distribution of the paralogues following symmetric and asymmetric duplications per species. Plants are shown on a white background, and animals are presented on a grey background.
