# Supplementary material for: Unveiling the functional fate of duplicated genes through expression profiling and structural analysis
Source: HighWire-hosted journal article supplement (doi:10.1101/gr.280166.124), 2025-08-14
Supplement: Supplemental_Fig_S12.pdf [file Supplemental_Fig_S12.pdf]

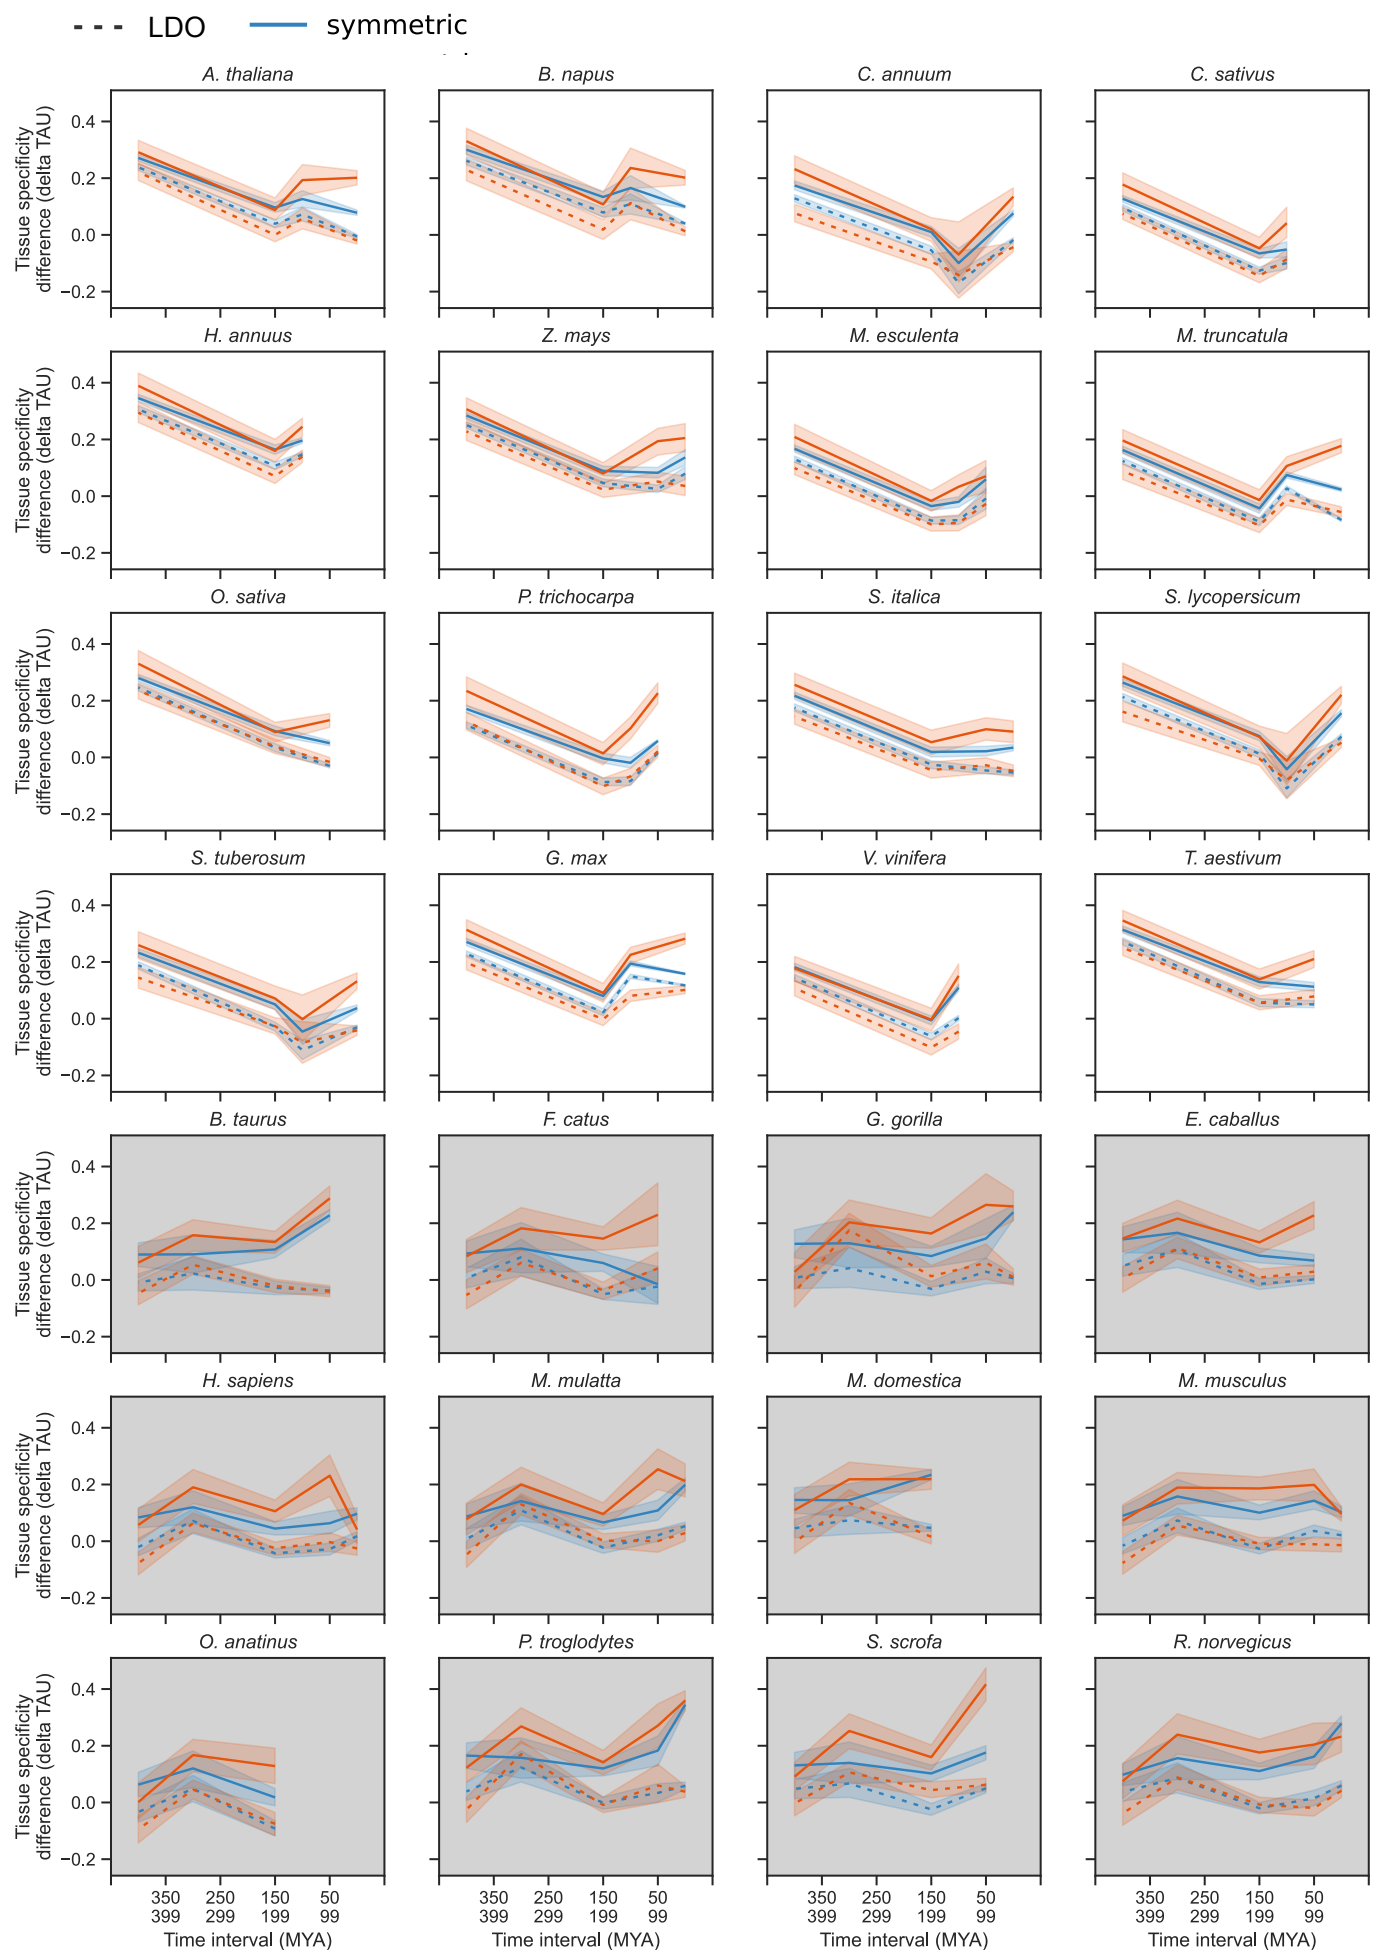

**Supplemental Fig. S12.** Delta TAU between the closest orthologues and the LDO (dashed lines) and MDO (solid lines) gene following symmetric (blue) and asymmetric (orange) duplications. The x-axis indicates the divergence time between the species compared, in time intervals. Plants are shown on a white background, and animals are presented on a grey background.
