# Supplementary material for: Unveiling the functional fate of duplicated genes through expression profiling and structural analysis
Source: HighWire-hosted journal article supplement (doi:10.1101/gr.280166.124), 2025-08-14
Supplement: Supplemental_Table_S1.xlsx [file Supplemental_Table_S1.xlsx]

## Sheet: Supplemental_Table_S1
Supplemental Table S1. Family-specific factors of each gene tree. The columns in order indicate: the gene tree ID as in PANTHER, the gene family name as in PANTHER, the number of branches in the gene tree, and the family-specific factor.
family_id	family_name	branch_count	rate
PTHR39767	CALCIUM/CALMODULIN-BINDING MEMBRANE PROTEIN PCM4-RELATED	1	0.0121406
PTHR33246	CCHC-TYPE DOMAIN-CONTAINING PROTEIN	1	0.046724
PTHR33211	EXPRESSED PROTEIN	1	0.0519813
PTHR33339	FAMILY NOT NAMED	1	0.0656416
PTHR40866	DIMER_TNP_HAT DOMAIN-CONTAINING PROTEIN	2	0.0904123
PTHR33180	PHOTOSYSTEM II CP43 REACTION CENTER PROTEIN	177	0.0933138
PTHR31564	ANAPHASE-PROMOTING COMPLEX SUBUNIT 16	36	0.107737
PTHR42814	AMP-BINDING DOMAIN-CONTAINING PROTEIN	1	0.107952
PTHR33206	PROTEIN CBG10425	6	0.118025
PTHR13120	PHD FINGER-LIKE DOMAIN-CONTAINING PROTEIN 5A	216	0.139304
PTHR21459	UNCHARACTERIZED	3	0.140407
PTHR48132	ZGC:171772	58	0.142112
PTHR10484	HISTONE H4	470	0.144285
PTHR11140	PRE-MRNA SPLICING FACTOR PRP8	219	0.144997
PTHR28564	STANNIN	29	0.145641
PTHR42888	50S RIBOSOMAL PROTEIN L36, CHLOROPLASTIC	85	0.14589
PTHR48141	KINASE C, PUTATIVE-RELATED	1	0.155399
PTHR34409	SET DOMAIN-CONTAINING PROTEIN	2	0.15562
PTHR48123	ARL2_BIND_BART DOMAIN-CONTAINING PROTEIN	11	0.157098
PTHR15825	UBIQUITIN-FOLD MODIFIER 1	184	0.160614
PTHR13042	UBIQUITIN-LIKE PROTEIN 5	231	0.16288
PTHR48144	DNA-DIRECTED DNA POLYMERASE	6	0.162954
PTHR47028	RECEPTOR-TYPE TYROSINE-PROTEIN PHOSPHATASE O	34	0.164475
PTHR47128	FAMILY NOT NAMED	89	0.165056
PTHR33481	REVERSE TRANSCRIPTASE	6	0.166247
PTHR38052	EXPRESSED PROTEIN	5	0.166709
PTHR43260	3-KETOSTEROID-DELTA-1-DEHYDROGENASE	9	0.171353
PTHR47781	50S RIBOSOMAL PROTEIN L36 2	13	0.177294
PTHR42955	GLYCERALDEHYDE-3-PHOSPHATE DEHYDROGENASE	8	0.179097
PTHR43389	V-TYPE PROTON ATPASE SUBUNIT B	329	0.180366
PTHR11588	TUBULIN	2621	0.181302
PTHR43454	GLYCERALDEHYDE-3-PHOSPHATE DEHYDROGENASE	7	0.182826
PTHR10769	40S RIBOSOMAL PROTEIN S28	255	0.183126
PTHR23431	DNA-DIRECTED RNA POLYMERASES I, II, AND III SUBUNIT RPABC5 FAMILY MEMBER	229	0.183217
PTHR23073	26S PROTEASOME REGULATORY SUBUNIT	1694	0.184864
PTHR40087	PHENOLIC ACID DECARBOXYLASE PADC	8	0.186739
PTHR35363	FAMILY NOT NAMED	1	0.190556
PTHR11093	RUVB-RELATED REPTIN AND PONTIN	446	0.192927
PTHR36219	FAMILY NOT NAMED	13	0.196773
PTHR11964	S-ADENOSYLMETHIONINE SYNTHETASE	555	0.198031
PTHR39224	IGA-INDUCING PROTEIN HOMOLOG	14	0.199711
PTHR22629	ARP2/3 COMPLEX 20 KD SUBUNIT	185	0.201098
PTHR12642	RIBOSOME BIOGENESIS PROTEIN NSA2 HOMOLOG	231	0.2013
PTHR11847	RIBOSOMAL PROTEIN L15	319	0.201828
PTHR12097	SPLICING FACTOR 3B, SUBUNIT 1-RELATED	214	0.203204
PTHR12921	UBIQUITIN-FOLD MODIFIER-CONJUGATING ENZYME 1	169	0.204759
PTHR13829	SNRNP CORE PROTEIN FAMILY MEMBER	193	0.206205
PTHR47626	STERILE ALPHA MOTIF (SAM) DOMAIN-CONTAINING PROTEIN	97	0.206323
PTHR43339	RUBRERYTHRIN-RELATED	5	0.206745
PTHR15184	ATP SYNTHASE	447	0.207001
PTHR48129	60S RIBOSOMAL PROTEIN L37A	114	0.21061
PTHR36999	ISOCITRATE DEHYDROGENASE [NADP]	15	0.210626
PTHR19970	RIBOSOMAL PROTEIN L39E	314	0.211131
PTHR37475	ZYGOTE-SPECIFIC CLASS V COPY B GENE PROTEIN	12	0.211529
PTHR35715	OS08G0511800 PROTEIN	92	0.213117
PTHR23420	ADENOSYLHOMOCYSTEINASE	411	0.21415
PTHR43183	HYPOTHETICAL DIHYDROXYACID DEHYDRATASE (EUROFUNG)-RELATED	13	0.214257
PTHR36082	FAMILY NOT NAMED	63	0.214716
PTHR20971	U6 SNRNA-ASSOCIATED PROTEIN	186	0.215571
PTHR43088	SUBUNIT OF PYRUVATE:FLAVODOXIN OXIDOREDUCTASE-RELATED	7	0.215745
PTHR42805	PTERIN-4-ALPHA-CARBINOLAMINE DEHYDRATASE-RELATED	7	0.216819
PTHR11652	30S RIBOSOMAL PROTEIN S12 FAMILY MEMBER	587	0.217481
PTHR48160	FAMILY NOT NAMED	24	0.219116
PTHR48359	FAMILY NOT NAMED	1	0.219261
PTHR37069	DDE_TNP_1_7 DOMAIN-CONTAINING PROTEIN	1	0.219585
PTHR40449	ETHANOLAMINE UTILIZATION PROTEIN EUTS	6	0.221332
PTHR39434	FAMILY NOT NAMED	11	0.221572
PTHR45810	HISTONE H3.2	91	0.221985
PTHR39427	FAMILY NOT NAMED	3	0.222762
PTHR36155	BLL5354 PROTEIN	15	0.223546
PTHR12638	PROTEIN MAGO NASHI HOMOLOG	243	0.223796
PTHR12216	UROCANATE HYDRATASE	86	0.224448
PTHR46595	60S RIBOSOMAL PROTEIN L34	58	0.224656
PTHR11995	NADH DEHYDROGENASE	342	0.225821
PTHR38341	FRUCTOSE-1,6-BISPHOSPHATE ALDOLASE/PHOSPHATASE	9	0.227649
PTHR34500	EXPRESSED PROTEIN	1	0.228037
PTHR36411	FAMILY NOT NAMED	65	0.228057
PTHR48082	ATP SYNTHASE SUBUNIT ALPHA, MITOCHONDRIAL	356	0.228354
PTHR10369	60S RIBOSOMAL PROTEIN L36A/L44	328	0.22945
PTHR43127	DEVELOPMENTALLY-REGULATED GTP-BINDING PROTEIN 2	418	0.229474
PTHR35774	PHOTOSYSTEM II REACTION CENTER PROTEIN M	58	0.230107
PTHR43590	ARSENIC RESISTANCE PROTEIN ARSH (AFU_ORTHOLOGUE AFUA_5G15030)	11	0.230179
PTHR12777	SMALL NUCLEAR RIBONUCLEOPROTEIN SM D2	241	0.230346
PTHR35326	PROTEIN PSBN	76	0.230514
PTHR38449	REGULATORY PROTEIN TM_1690-RELATED	10	0.230603
PTHR23118	ATP-CITRATE SYNTHASE	231	0.231164
PTHR24071	RAN GTPASE	348	0.231206
PTHR40069	YWBE PROTEIN	10	0.231528
PTHR10263	V-TYPE PROTON ATPASE PROTEOLIPID SUBUNIT	649	0.232442
PTHR48137	FAMILY NOT NAMED	89	0.233069
PTHR34402	PROTEIN CBG02762	3	0.234167
PTHR43148	GLYCERALDEHYDE-3-PHOSPHATE DEHYDROGENASE 2	276	0.234321
PTHR43365	BLR7806 PROTEIN	11	0.234864
PTHR11780	NADH-UBIQUINONE OXIDOREDUCTASE FLAVOPROTEIN 1 NDUFV1	231	0.236027
PTHR43504	ISOCITRATE DEHYDROGENASE [NADP]	29	0.236584
PTHR10732	40S RIBOSOMAL PROTEIN S17	328	0.236751
PTHR39329	ETHANOLAMINE AMMONIA-LYASE HEAVY CHAIN	10	0.237087
PTHR45619	SERINE/THREONINE-PROTEIN PHOSPHATASE PP2A-RELATED	1098	0.238609
PTHR11885	RIBOSOMAL PROTEIN S15P/S13E	303	0.238789
PTHR42704	RIBULOSE BISPHOSPHATE CARBOXYLASE	111	0.238816
PTHR23547	MAJOR FACILITATOR SUPERFAMILY DOMAIN, GENERAL SUBSTRATE TRANSPORTER	8	0.239053
PTHR37466	SLR1628 PROTEIN	13	0.239238
PTHR31829	PYRIDOXAL 5'-PHOSPHATE SYNTHASE SUBUNIT SNZ1-RELATED	249	0.239899
PTHR43609	ACETYL-COA HYDROLASE	34	0.240928
PTHR48149	60S RIBOSOMAL PROTEIN L37A-2	37	0.241053
PTHR43440	UREASE	85	0.241259
PTHR43743	POTASSIUM-TRANSPORTING ATPASE ATP-BINDING SUBUNIT	26	0.241381
PTHR42871	CITRATE SYNTHASE	23	0.241441
PTHR30559	FRUCTOSE-BISPHOSPHATE ALDOLASE CLASS 2	42	0.242213
PTHR48101	METHYLMALONYL-COA MUTASE, MITOCHONDRIAL-RELATED	98	0.242255
PTHR23127	CENTROMERE/MICROTUBULE BINDING PROTEIN CBF5	246	0.243535
PTHR10747	TRANSCRIPTION FACTOR COE FAMILY MEMBER	162	0.243659
PTHR30191	FORMATE ACETYLTRANSFERASE	28	0.244977
PTHR38482	DMT FAMILY PROTEIN	10	0.245431
PTHR46422	SERINE/THREONINE-PROTEIN PHOSPHATASE BSL3	238	0.245623
PTHR42854	EUKARYOTIC TRANSLATION INITIATION FACTOR 2 SUBUNIT 3 FAMILY MEMBER	290	0.246011
PTHR43858	ENERGY-DEPENDENT TRANSLATIONAL THROTTLE PROTEIN ETTA	39	0.246122
PTHR11822	NADP-SPECIFIC ISOCITRATE DEHYDROGENASE	433	0.246562
PTHR42892	GLUCOSAMINE-6-PHOSPHATE DEAMINASE-LIKE PROTEIN BT_0258-RELATED	10	0.247523
PTHR30557	THIAMINE BIOSYNTHESIS PROTEIN THIC	145	0.247598
PTHR40137	PROTEIN GVPK 1	2	0.248189
PTHR43518	NITRATE REDUCTASE BETA SUBUNIT	21	0.248791
PTHR30073	ASPARTATE--AMMONIA LIGASE	18	0.251927
PTHR43607	V-TYPE PROTON ATPASE CATALYTIC SUBUNIT A	257	0.252949
PTHR43594	QUERCETIN 2,3-DIOXYGENASE	8	0.253163
PTHR33205	FAMILY NOT NAMED	54	0.254973
PTHR37266	CYTOCHROME B6-F COMPLEX SUBUNIT 6	57	0.255835
PTHR12052	THIOREDOXIN-LIKE PROTEN 4A, 4B	368	0.25805
PTHR10784	EUKARYOTIC TRANSLATION INITIATION FACTOR 6	265	0.258148
PTHR39563	XANTHINE PHOSPHORIBOSYLTRANSFERASE	8	0.258183
PTHR43160	ACONITATE HYDRATASE B	158	0.258295
PTHR30454	4-HYDROXY-3-METHYLBUT-2-EN-1-YL DIPHOSPHATE SYNTHASE	129	0.259513
PTHR11594	40S RIBOSOMAL PROTEIN S27	375	0.259737
PTHR42807	GLUTARYL-COA DEHYDROGENASE, MITOCHONDRIAL	107	0.259821
PTHR40114	SLR0698 PROTEIN	1	0.26
PTHR43809	NITRITE REDUCTASE (NADH) LARGE SUBUNIT	18	0.260636
PTHR31757	SLL0781 PROTEIN	32	0.260686
PTHR11353	CHAPERONIN	1944	0.261803
PTHR12650	40S RIBOSOMAL PROTEIN S30/UBIQUITIN-LIKE PROTEIN FUBI	276	0.262327
PTHR12010	40S RIBOSOMAL PROTEIN S29	250	0.264148
PTHR43113	NUCLEOSIDE-DIPHOSPHATE-SUGAR EPIMERASE	107	0.265028
PTHR11444	ASPARTATEAMMONIA/ARGININOSUCCINATE/ADENYLOSUCCINATE LYASE	252	0.265653
PTHR11021	SMALL NUCLEAR RIBONUCLEOPROTEIN F SNRNP-F	430	0.265759
PTHR39591	UPF0265 PROTEIN YEEX	8	0.265774
PTHR23430	HISTONE H2A	2065	0.266636
PTHR44366	UDP-N-ACETYLGLUCOSAMINE--PEPTIDE N-ACETYLGLUCOSAMINYLTRANSFERASE 110 KDA SUBUNIT	96	0.267302
PTHR46974	MITOCHONDRIAL GTP/GDP CARRIER PROTEIN 1	35	0.269327
PTHR11726	60S RIBOSOMAL PROTEIN L10	342	0.269533
PTHR43728	SLR0304 PROTEIN	13	0.269618
PTHR30335	INTEGRAL MEMBRANE PROTEIN OF SOXR-REDUCING COMPLEX	31	0.270241
PTHR11627	FRUCTOSE-BISPHOSPHATE ALDOLASE	673	0.270634
PTHR34733	FAMILY NOT NAMED	2	0.270677
PTHR11502	40S RIBOSOMAL PROTEIN S6	343	0.272997
PTHR10394	40S RIBOSOMAL PROTEIN S8	360	0.273445
PTHR30555	HYDROPEROXIDASE I, BIFUNCTIONAL CATALASE-PEROXIDASE	33	0.273499
PTHR43360	CARBON DIOXIDE CONCENTRATING MECHANISM PROTEIN CCMM	5	0.273677
PTHR32331	UPF0313 PROTEIN YGIQ	17	0.27413
PTHR33370	TRANSLATION INITIATION FACTOR IF-1, CHLOROPLASTIC	142	0.274907
PTHR43532	GLUCOSE-1-PHOSPHATE THYMIDYLYLTRANSFERASE	38	0.275128
PTHR11210	RING BOX	557	0.275153
PTHR23205	SPLICING FACTOR 3A SUBUNIT 2	202	0.275184
PTHR43118	RHAMNOGALACTURONAN LYASE (EUROFUNG)	6	0.275475
PTHR46305	FAMILY NOT NAMED	12	0.275794
PTHR11624	DEHYDROGENASE RELATED	403	0.276013
PTHR39207	ALPHA-GLUCURONIDASE A	12	0.276177
PTHR47525	OS07G0295200 PROTEIN	82	0.276434
PTHR11753	ADAPTOR COMPLEXES SMALL SUBUNIT FAMILY	966	0.276702
PTHR31053	MAGNESIUM-PROTOPORPHYRIN IX MONOMETHYL ESTER [OXIDATIVE] CYCLASE, CHLOROPLASTIC	98	0.276704
PTHR30389	FUMARATE HYDRATASE-RELATED	51	0.277
PTHR43170	GMP REDUCTASE	117	0.277364
PTHR43822	HOMOACONITASE, MITOCHONDRIAL-RELATED	240	0.277865
PTHR20856	DNA-DIRECTED RNA POLYMERASE I SUBUNIT 2	846	0.277983
PTHR10113	PEPTIDE CHAIN RELEASE FACTOR SUBUNIT 1	357	0.278047
PTHR33668	PROTEIN BRICK1	141	0.278493
PTHR10722	60S RIBOSOMAL PROTEIN L19	368	0.279881
PTHR11117	SUCCINYL-COA LIGASE SUBUNIT ALPHA	300	0.280389
PTHR43202	NICOTINATE-NUCLEOTIDE PYROPHOSPHORYLASE	10	0.281154
PTHR11118	UNCHARACTERIZED	111	0.281271
PTHR46703	FAMILY NOT NAMED	8	0.281305
PTHR31844	MYELIN-ASSOCIATED NEURITE-OUTGROWTH INHIBITOR-RELATED	74	0.281623
PTHR43250	EXODEOXYRIBONUCLEASE III	34	0.282001
PTHR11632	SUCCINATE DEHYDROGENASE 2 FLAVOPROTEIN SUBUNIT	307	0.282005
PTHR45684	RE74312P	476	0.282044
PTHR23338	SMALL NUCLEAR RIBONUCLEOPROTEIN SM	731	0.282254
PTHR47259	FAMILY NOT NAMED	27	0.283333
PTHR12538	40S RIBOSOMAL PROTEIN S26	326	0.283436
PTHR11363	60S RIBOSOMAL PROTEIN L3-RELATED	372	0.28455
PTHR40695	4-PHOSPHOPANTOATE--BETA-ALANINE LIGASE	9	0.285294
PTHR19850	GUANINE NUCLEOTIDE-BINDING PROTEIN BETA G PROTEIN BETA	399	0.285303
PTHR43627	FAMILY NOT NAMED	8	0.285664
PTHR40630	POSSIBLE DNA-BINDING PROTEIN	10	0.28591
PTHR11599	PROTEASOME SUBUNIT ALPHA/BETA	3322	0.286298
PTHR43583	2-IMINOACETATE SYNTHASE	21	0.286414
PTHR21194	CARDIAC PHOSPHOLAMBAN	34	0.286585
PTHR24068	UBIQUITIN-CONJUGATING ENZYME E2	4459	0.286728
PTHR42980	2-OXOISOVALERATE DEHYDROGENASE SUBUNIT BETA-RELATED	215	0.286818
PTHR43473	MAGNESIUM-CHELATASE SUBUNIT CHLD, CHLOROPLASTIC	85	0.287043
PTHR42691	ASPARTATE AMINOTRANSFERASE YHDR-RELATED	9	0.287379
PTHR43842	PROPIONYL-COA CARBOXYLASE BETA CHAIN	101	0.287458
PTHR43715	GDP-MANNOSE 4,6-DEHYDRATASE	237	0.287615
PTHR11811	6-PHOSPHOGLUCONATE DEHYDROGENASE	368	0.287892
PTHR33683	1, PUTATIVE-RELATED	2	0.288553
PTHR43538	ALPHA-IPM SYNTHASE/HOMOCITRATE SYNTHASE	23	0.288615
PTHR13214	ZINC FINGER PROTEIN 330	61	0.288797
PTHR33391	CYTOCHROME B559 SUBUNIT BETA-RELATED	221	0.289117
PTHR43812	BLR2425 PROTEIN	10	0.289424
PTHR21668	EIF-1A	310	0.290078
PTHR11670	ACONITASE/IRON-RESPONSIVE ELEMENT FAMILY MEMBER	388	0.290313
PTHR47195	KELCH REPEAT AND BTB DOMAIN-CONTAINING PROTEIN 4	36	0.290467
PTHR40596	CITRATE LYASE ALPHA CHAIN	8	0.290877
PTHR39649	50S RIBOSOMAL PROTEIN L40E	10	0.29129
PTHR10965	60S RIBOSOMAL PROTEIN L38	289	0.291464
PTHR42197	TRNA (CYTIDINE(56)-2'-O)-METHYLTRANSFERASE	7	0.291569
PTHR36752	OS12G0405700 PROTEIN	63	0.293029
PTHR36394	OS01G0277700 PROTEIN	89	0.293135
PTHR45833	METHIONINE SYNTHASE	104	0.293421
PTHR34058	OXYGEN-EVOLVING ENHANCER PROTEIN 1-2, CHLOROPLASTIC	132	0.293786
PTHR12976	RETINAL ROD RHODOPSIN-SENSITIVE CGMP 3',5'-CYCLIC PHOSPHODIESTERASE DELTA-SUBUNIT	73	0.294047
PTHR11761	50S/60S RIBOSOMAL PROTEIN L14/L23	595	0.29431
PTHR37319	TRANSPOSASE	4	0.294401
PTHR13110	U6 SNRNA-ASSOCIATED SM-LIKE PROTEIN LSM3	232	0.294493
PTHR11994	60S RIBOSOMAL PROTEIN L11-RELATED	544	0.29454
PTHR19411	PROTEIN BUD31-RELATED	253	0.29483
PTHR11405	CARBAMOYLTRANSFERASE FAMILY MEMBER	598	0.294965
PTHR11374	UDP-GLUCOSE DEHYDROGENASE/UDP-MANNAC DEHYDROGENASE	361	0.295531
PTHR48320	FAMILY NOT NAMED	98	0.295764
PTHR34812	PHOTOSYSTEM II REACTION CENTER PROTEIN J	74	0.296149
PTHR10759	60S RIBOSOMAL PROTEIN L34	294	0.296416
PTHR23413	60S RIBOSOMAL PROTEIN L32 AND DNA-DIRECTED RNA POLYMERASE II, SUBUNIT N	350	0.296507
PTHR30492	METHYLGLYOXAL SYNTHASE	19	0.296589
PTHR11449	RIBOSOMAL PROTEIN L30	336	0.296704
PTHR11593	60S RIBOSOMAL PROTEIN L17	386	0.296734
PTHR46425	TRANSCRIPTION TERMINATION FACTOR RHO	44	0.297079
PTHR42908	TRANSLATION ELONGATION FACTOR-RELATED	956	0.297146
PTHR11528	HEAT SHOCK PROTEIN 90 FAMILY MEMBER	988	0.297713
PTHR11661	60S RIBOSOMAL PROTEIN L12	683	0.298236
PTHR21649	CHLOROPHYLL A/B BINDING PROTEIN	1584	0.298424
PTHR47183	GLUCOSE-1-PHOSPHATE CYTIDYLYLTRANSFERASE-RELATED	20	0.29889
PTHR41536	PKHD-TYPE HYDROXYLASE YBIX	5	0.298904
PTHR43468	FAMILY NOT NAMED	3	0.299162
PTHR10617	ELECTRON TRANSFER FLAVOPROTEIN-UBIQUINONE OXIDOREDUCTASE	195	0.299506
PTHR11028	VACUOLAR ATP SYNTHASE SUBUNIT AC39	257	0.299534
PTHR12745	SUPPRESSION OF TUMORIGENICITY 7	100	0.299632
PTHR13707	KETOACID-COENZYME A TRANSFERASE	150	0.299914
PTHR10934	60S RIBOSOMAL PROTEIN L18	340	0.300416
PTHR45732	ADP-RIBOSYLATION FACTOR-LIKE PROTEIN 8	377	0.3005
PTHR48142	PIGMENTOSA GTPASE REGULATOR-LIKE PROTEIN, PUTATIVE-RELATED	8	0.300504
PTHR43219	CRISPR-ASSOCIATED ENDONUCLEASE CAS1	12	0.300526
PTHR43305	FAMILY N-ACETYLTRANSFERASE, PUTATIVE (AFU_ORTHOLOGUE AFUA_2G01380)-RELATED	11	0.300584
PTHR13305	RIBOSOME BIOGENESIS PROTEIN NOP10	206	0.300598
PTHR11143	60S RIBOSOMAL PROTEIN L26 FAMILY MEMBER	319	0.300623
PTHR34410	INTRON-ENCODED HOMING ENDONUCLEASE, PUTATIVE-RELATED	27	0.300975
PTHR42696	ASPARTATE AMMONIA-LYASE	25	0.30122
PTHR11510	MYO-INOSITOL-1 PHOSPHATE SYNTHASE	251	0.301243
PTHR43869	GLYCINE BETAINE/PROLINE BETAINE TRANSPORT SYSTEM ATP-BINDING PROTEIN PROV	13	0.301441
PTHR47188	PROTEIN TAR1	69	0.301475
PTHR22855	ACETYL, PROPIONYL, PYRUVATE, AND GLUTACONYL CARBOXYLASE-RELATED	229	0.301536
PTHR21235	IMIDAZOLE GLYCEROL PHOSPHATE SYNTHASE SUBUNIT HISF/H IGP SYNTHASE SUBUNIT HISF/H	182	0.301688
PTHR20978	SPLICING FACTOR 3B SUBUNIT 5	203	0.30188
PTHR43797	HOMOCYSTEINE/CYSTEINE SYNTHASE	60	0.301912
PTHR47562	FAMILY NOT NAMED	20	0.302589
PTHR10681	THIOREDOXIN PEROXIDASE	490	0.302757
PTHR43530	QUEUINE TRNA-RIBOSYLTRANSFERASE CATALYTIC SUBUNIT 1	189	0.303198
PTHR11581	30S/40S RIBOSOMAL PROTEIN S4	390	0.303321
PTHR43571	NADP-SPECIFIC GLUTAMATE DEHYDROGENASE 1-RELATED	165	0.303567
PTHR21000	DIHYDROXY-ACID DEHYDRATASE DAD	158	0.30364
PTHR43778	PYRUVATE CARBOXYLASE	117	0.30411
PTHR23115	TRANSLATION FACTOR	989	0.304139
PTHR11680	SERINE HYDROXYMETHYLTRANSFERASE	746	0.304291
PTHR10836	GLYCERALDEHYDE 3-PHOSPHATE DEHYDROGENASE	651	0.304441
PTHR48077	TRYPTOPHAN SYNTHASE-RELATED	358	0.304545
PTHR31117	PROTEIN KREG-1	21	0.30466
PTHR43332	INNER MEMBRANE TRANSPORT PERMEASE YADH-RELATED	16	0.304797
PTHR34939	PHOTOSYSTEM I REACTION CENTER SUBUNIT III, CHLOROPLASTIC	107	0.305307
PTHR43237	NADP-DEPENDENT MALIC ENZYME	56	0.305578
PTHR45787	LD11652P	200	0.305586
PTHR47552	PHOSPHORIBOSYLFORMYLGLYCINAMIDINE SYNTHASE SUBUNIT PURQ	30	0.305728
PTHR30586	ELECTRON TRANSPORT COMPLEX PROTEIN RNFE	30	0.305764
PTHR47227	DNA-DIRECTED RNA POLYMERASE SUBUNIT K	236	0.306107
PTHR42727	PHOSPHATE TRANSPORT SYSTEM PERMEASE PROTEIN	16	0.306789
PTHR43078	UDP-GLUCURONIC ACID DECARBOXYLASE-RELATED	537	0.306893
PTHR43168	50S RIBOSOMAL PROTEIN L33, CHLOROPLASTIC	114	0.307496
PTHR42864	LIGHT-INDEPENDENT PROTOCHLOROPHYLLIDE REDUCTASE IRON-SULFUR ATP-BINDING PROTEIN	20	0.308362
PTHR48095	PYRUVATE CARBOXYLASE SUBUNIT A	151	0.308544
PTHR21057	PHOSPHO-2-DEHYDRO-3-DEOXYHEPTONATE ALDOLASE	115	0.308669
PTHR47828	ARCHAEAL HISTONE A	12	0.308836
PTHR31715	UREASE ACCESSORY PROTEIN G	137	0.308923
PTHR10949	LIPOYL SYNTHASE	344	0.308988
PTHR43257	PYRUVATE DEHYDROGENASE E1 COMPONENT BETA SUBUNIT	16	0.309142
PTHR43299	UPF0718 PROTEIN YRAQ	7	0.309482
PTHR40084	PHOSPHOHYDROLASE, PHP FAMILY	8	0.309625
PTHR43159	ENOYL-[ACYL-CARRIER-PROTEIN] REDUCTASE	182	0.309744
PTHR34595	BLR5612 PROTEIN	21	0.30978
PTHR42889	BLR3681 PROTEIN	7	0.309832
PTHR45331	OXIDOREDUCTASE, IRON-SULPHUR BINDING SUBUNIT-RELATED-RELATED	15	0.310002
PTHR20852	GLUTAMINE SYNTHETASE	529	0.310101
PTHR23428	HISTONE H2B	1392	0.310352
PTHR12166	CALCIUM-DEPENDENT SECRETION ACTIVATOR	98	0.310403
PTHR23415	CYCLIN-DEPENDENT KINASES REGULATORY SUBUNIT/60S RIBOSOME SUBUNIT BIOGENESIS PROTEIN NIP7	515	0.310778
PTHR34068	UPF0145 PROTEIN YBJQ	35	0.310856
PTHR28562	COP9 SIGNALOSOME COMPLEX SUBUNIT 9	47	0.311558
PTHR36697	S-ADENOSYLMETHIONINE SYNTHASE	13	0.312406
PTHR10768	60S RIBOSOMAL PROTEIN L37	359	0.312452
PTHR42700	SULFATE ADENYLYLTRANSFERASE	42	0.312541
PTHR48102	ATP-DEPENDENT CLP PROTEASE ATP-BINDING SUBUNIT CLPX-LIKE, MITOCHONDRIAL-RELATED	434	0.312732
PTHR30409	CARBAMATE KINASE	23	0.312824
PTHR34383	POLYPHOSPHATE:AMP PHOSPHOTRANSFERASE-RELATED	29	0.313002
PTHR19248	ATP-BINDING TRANSPORT PROTEIN-RELATED	296	0.313036
PTHR30325	MEMBRANE COMPONENT OF ABC TRANSPORTER	12	0.313366
PTHR31998	K(+)-INSENSITIVE PYROPHOSPHATE-ENERGIZED PROTON PUMP	427	0.313557
PTHR34772	RNA-BINDING PROTEIN HFQ	26	0.314157
PTHR28082	ZINC FINGER PROTEIN	32	0.315199
PTHR18804	RIBOSOMAL PROTEIN	107	0.315316
PTHR31916	FAMILY NOT NAMED	582	0.315753
PTHR44758	NAD(P) TRANSHYDROGENASE SUBUNIT BETA	20	0.315864
PTHR43275	D-MALATE DEHYDROGENASE [DECARBOXYLATING]	27	0.315993
PTHR44516	2-METHYL-6-PHYTYL-1,4-HYDROQUINONE METHYLTRANSFERASE, CHLOROPLASTIC	148	0.316142
PTHR12309	SEC61 GAMMA SUBUNIT	290	0.316343
PTHR45633	60 KDA HEAT SHOCK PROTEIN, MITOCHONDRIAL	880	0.318337
PTHR21371	KETOL-ACID REDUCTOISOMERASE, MITOCHONDRIAL	220	0.31844
PTHR10849	NADH DEHYDROGENASE UBIQUINONE IRON-SULFUR PROTEIN 8, MITOCHONDRIAL	256	0.318649
PTHR45625	PEPTIDYL-PROLYL CIS-TRANS ISOMERASE-RELATED	979	0.318892
PTHR43106	DEHYDROGENASE-RELATED	13	0.31893
PTHR43534	MIND SUPERFAMILY P-LOOP ATPASE CONTAINING AN INSERTED FERREDOXIN DOMAIN	8	0.319032
PTHR11135	HISTONE ACETYLTRANSFERASE-RELATED	269	0.319107
PTHR20931	UNCHARACTERIZED	115	0.319233
PTHR11489	40S RIBOSOMAL PROTEIN SA	336	0.319253
PTHR34266	THIAZOLE SYNTHASE	30	0.319345
PTHR45896	N-ALPHA-ACETYLTRANSFERASE 30	204	0.320708
PTHR43230	ABC-TYPE DIPEPTIDE/OLIGOPEPTIDE TRANSPORT SYSTEM, ATPASE COMPONENT	12	0.321727
PTHR12704	TRANS-GOLGI PROTEIN GMX33	129	0.32206
PTHR43512	TRANSLATION FACTOR GUF1-RELATED	319	0.322068
PTHR38461	4-DEOXY-L-THREO-5-HEXOSULOSE-URONATE KETOL-ISOMERASE	8	0.322288
PTHR10480	PROTEIN UNC-13 HOMOLOG	140	0.322288
PTHR11573	RIBONUCLEOSIDE-DIPHOSPHATE REDUCTASE LARGE CHAIN	289	0.322354
PTHR12750	DIPHOSPHOINOSITOL PENTAKISPHOSPHATE KINASE	269	0.322926
PTHR38429	SEPTATION PROTEIN SPOVG-RELATED	11	0.323013
PTHR38597	BLL3834 PROTEIN	12	0.323286
PTHR40052	UPF0403 PROTEIN YQIW-RELATED	8	0.323412
PTHR36303	2',3'-CYCLIC-NUCLEOTIDE 2'-PHOSPHODIESTERASE	17	0.323704
PTHR11993	NADH-UBIQUINONE OXIDOREDUCTASE 49 KDA SUBUNIT	261	0.323771
PTHR40201	OSMIOPHILIC BODY PROTEIN	1	0.324042
PTHR43661	D-XYLONATE DEHYDRATASE	48	0.324095
PTHR40727	TRANSCRIPTION REGULATOR, ENCODED NEXT TO RECA SUPERFAMILY ATPASE-RELATED	8	0.324523
PTHR43073	DIHYDROPYRIMIDINE DEHYDROGENASE [NADP(+)]	165	0.324637
PTHR47173	PROTEIN DR1 HOMOLOG	114	0.324782
PTHR33746	RUBRERYTHRIN	10	0.324835
PTHR43018	PHOSPHO-2-DEHYDRO-3-DEOXYHEPTONATE ALDOLASE	33	0.325252
PTHR35350	HYPOTHETICAL LOC314168	32	0.325261
PTHR11259	RAS-RELATED GTP BINDING RAG/GTR YEAST	280	0.32573
PTHR30168	PUTATIVE MEMBRANE PROTEIN YPFJ	12	0.325883
PTHR32039	MAGNESIUM-CHELATASE SUBUNIT CHLI	144	0.326152
PTHR42861	CALCIUM-TRANSPORTING ATPASE	1472	0.326442
PTHR43351	L(+)-TARTRATE DEHYDRATASE SUBUNIT BETA	24	0.326739
PTHR37469	CELLOBIONIC ACID PHOSPHORYLASE-RELATED	6	0.327025
PTHR43017	GALACTOSIDE O-ACETYLTRANSFERASE	7	0.327109
PTHR42848	FAMILY NOT NAMED	46	0.327241
PTHR46658	CYS OR MET METABOLISM PYRIDOXAL-PHOSPHATE-DEPENDENT ENZYME	80	0.327447
PTHR40089	ETHANOLAMINE UTILIZATION PROTEIN EUTH	9	0.327523
PTHR32008	MATURIN	35	0.327989
PTHR11773	GLYCINE DEHYDROGENASE, DECARBOXYLATING	248	0.328231
PTHR21569	RIBOSOMAL PROTEIN S9	629	0.328358
PTHR10266	CYTOCHROME C1	259	0.328381
PTHR35775	FAMILY NOT NAMED	61	0.328423
PTHR10176	GLYCOGEN SYNTHASE	135	0.328473
PTHR43732	RIBOSE 5-PHOSPHATE ISOMERASE-RELATED	10	0.328681
PTHR41317	FAMILY NOT NAMED	7	0.328906
PTHR42689	ACETYL-COA ACYLTRANSFERASE FADA2 (3-KETOACYL-COA THIOLASE) (BETA-KETOTHIOLASE)-RELATED	4	0.328994
PTHR43111	ALDEHYDE DEHYDROGENASE B-RELATED	27	0.329295
PTHR40690	GLL3100 PROTEIN	1	0.32967
PTHR11760	30S/40S RIBOSOMAL PROTEIN S3	541	0.32968
PTHR10553	SMALL NUCLEAR RIBONUCLEOPROTEIN	475	0.329908
PTHR34803	PHOTOSYSTEM I REACTION CENTER SUBUNIT XI, CHLOROPLASTIC	101	0.330116
PTHR35454	AGAP005206-PA	1	0.330349
PTHR46815	PROTEIN KISH-B	49	0.330589
PTHR45777	METHIONINE AMINOPEPTIDASE 2	257	0.330663
PTHR10902	60S RIBOSOMAL PROTEIN L35A	320	0.330682
PTHR43632	PERMEASE COMPONENT OF TUNGSTATE ABC TRANSPORTER	10	0.330685
PTHR11911	INOSINE-5-MONOPHOSPHATE DEHYDROGENASE RELATED	329	0.33078
PTHR19431	60S RIBOSOMAL PROTEIN L4	309	0.331203
PTHR32194	METALLOPROTEASE TLDD	222	0.331465
PTHR31165	PROTEIN G1-LIKE2	799	0.331532
PTHR42110	L-ASPARAGINASE, PUTATIVE (AFU_ORTHOLOGUE AFUA_3G11890)-RELATED	8	0.331568
PTHR31891	FORMAMIDASE C869.04-RELATED	115	0.331739
PTHR11831	30S 40S RIBOSOMAL PROTEIN	696	0.331869
PTHR21631	ISOCITRATE LYASE/MALATE SYNTHASE	185	0.332355
PTHR42281	FAMILY NOT NAMED	4	0.332555
PTHR21337	PHOSPHO-2-DEHYDRO-3-DEOXYHEPTONATE ALDOLASE 1, 2	292	0.332715
PTHR34971	PHOTOSYSTEM II REACTION CENTER PROTEIN Z	82	0.332845
PTHR46954	C2H2-TYPE DOMAIN-CONTAINING PROTEIN	19	0.332854
PTHR11564	SIGNAL RECOGNITION PARTICLE 54K PROTEIN SRP54	431	0.332892
PTHR47752	HTH-TYPE TRANSCRIPTIONAL REPRESSOR FABR	10	0.332903
PTHR46718	ASPARTATE-SEMIALDEHYDE DEHYDROGENASE	44	0.332921
PTHR11758	40S RIBOSOMAL PROTEIN S15A	563	0.333743
PTHR48383	DDE TNP4 DOMAIN-CONTAINING PROTEIN	21	0.333872
PTHR11710	40S RIBOSOMAL PROTEIN S19	312	0.333911
PTHR11468	GLYCOGEN PHOSPHORYLASE	474	0.333916
PTHR24159	FAMILY NOT NAMED	2	0.333945
PTHR44830	ELONGATION FACTOR 1 ALPHA	31	0.33421
PTHR11193	SMALL NUCLEAR RIBONUCLEOPROTEIN E	251	0.334331
PTHR43700	PHOSPHORIBOSYLAMINOIMIDAZOLE-SUCCINOCARBOXAMIDE SYNTHASE	138	0.334387
PTHR21085	CHORISMATE SYNTHASE	195	0.334608
PTHR13861	VACUOLAR ATP SYNTHASE SUBUNIT F	225	0.334944
PTHR43188	ACYL-COENZYME A OXIDASE	125	0.335125
PTHR12850	40S RIBOSOMAL PROTEIN S25	327	0.335469
PTHR11700	30S RIBOSOMAL PROTEIN S10 FAMILY MEMBER	555	0.335542
PTHR11759	40S RIBOSOMAL PROTEIN S14/30S RIBOSOMAL PROTEIN S11	647	0.335671
PTHR46911	FAMILY NOT NAMED	31	0.33573
PTHR42210	DNA POLYMERASE II LARGE SUBUNIT	7	0.335752
PTHR47514	TRANSKETOLASE N-TERMINAL SECTION-RELATED	25	0.335795
PTHR45024	DEHYDROGENASES, SHORT CHAIN	57	0.335896
PTHR11545	RIBOSOMAL PROTEIN L13	692	0.336261
PTHR23222	PROHIBITIN	541	0.336288
PTHR40658	FAMILY NOT NAMED	5	0.336449
PTHR43165	METALLOPHOSPHOESTERASE	9	0.336454
PTHR43866	MALONATE-SEMIALDEHYDE DEHYDROGENASE	268	0.336465
PTHR35772	PHOTOSYSTEM II REACTION CENTER PROTEIN I	36	0.336574
PTHR35727	BNAA05G33520D PROTEIN	89	0.336702
PTHR40062	GTP-SENSING TRANSCRIPTIONAL PLEIOTROPIC REPRESSOR CODY	9	0.336736
PTHR47979	DRAB11-RELATED	1689	0.336822
PTHR24067	UBIQUITIN-CONJUGATING ENZYME E2	1498	0.337493
PTHR42702	NUCLEOTIDE PYROPHOSPHOHYDROLASE	8	0.337978
PTHR45007	CARBOXYLASE, PUTATIVE (AFU_ORTHOLOGUE AFUA_5G07570)-RELATED	18	0.338311
PTHR11516	PYRUVATE DEHYDROGENASE E1 COMPONENT, ALPHA SUBUNIT BACTERIAL AND ORGANELLAR	417	0.338572
PTHR11426	HISTONE H3	982	0.338649
PTHR43697	SERYL-TRNA SYNTHETASE	51	0.338973
PTHR42991	ALDEHYDE DEHYDROGENASE	161	0.338994
PTHR20981	60S RIBOSOMAL PROTEIN L21	393	0.339081
PTHR23539	MFS TRANSPORTER	6	0.339112
PTHR42795	ALANINE DEHYDROGENASE	27	0.339129
PTHR10744	40S RIBOSOMAL PROTEIN S11 FAMILY MEMBER	587	0.339362
PTHR48161	BNACNNG12870D PROTEIN	56	0.339756
PTHR10286	INORGANIC PYROPHOSPHATASE	705	0.339813
PTHR30519	5-METHYLTETRAHYDROPTEROYLTRIGLUTAMATE--HOMOCYSTEINE METHYLTRANSFERASE	249	0.339863
PTHR45963	RE52028P	140	0.33994
PTHR40080	LMO1763 PROTEIN	8	0.340027
PTHR42160	URACIL-DNA GLYCOSYLASE SUPERFAMILY PROTEIN	4	0.340352
PTHR23133	IMIDAZOLEGLYCEROL-PHOSPHATE DEHYDRATASE HIS7	178	0.34044
PTHR23314	SPERM-ASSOCIATED ANTIGEN 6 ARMADILLO REPEAT-CONTAINING	86	0.340471
PTHR24073	DRAB5-RELATED	3014	0.340488
PTHR11835	DECARBOXYLATING DEHYDROGENASES-ISOCITRATE, ISOPROPYLMALATE, TARTRATE	613	0.340495
PTHR23410	RIBOSOMAL PROTEIN L5-RELATED	311	0.340918
PTHR35331	STAGE V SPORULATION PROTEIN S	18	0.341261
PTHR48239	FAMILY NOT NAMED	21	0.341621
PTHR11205	RIBOSOMAL PROTEIN S7	631	0.34182
PTHR21679	UNCHARACTERIZED	18	0.341842
PTHR46831	ZINC FINGER MYND DOMAIN-CONTAINING PROTEIN 19	44	0.341995
PTHR40393	LYSINE BIOSYNTHESIS PROTEIN-RELATED-RELATED	6	0.342255
PTHR43636	ELONGATION FACTOR G, MITOCHONDRIAL	214	0.342532
PTHR38710	WITH PUTATIVE URIDYL PYROPHOSPHORYLASE-RELATED	24	0.342764
PTHR35805	ASPARTATE CARBAMOYLTRANSFERASE REGULATORY CHAIN	20	0.343375
PTHR23091	N-TERMINAL ACETYLTRANSFERASE	249	0.343391
PTHR22573	PHOSPHOHEXOMUTASE FAMILY MEMBER	350	0.343449
PTHR37532	PROTEIN ISCX	14	0.343547
PTHR11620	60S RIBOSOMAL PROTEIN L23A	483	0.343738
PTHR43058	SLR0655 PROTEIN	15	0.343759
PTHR43509	PTHR43509	22	0.343852
PTHR42986	BENZALDEHYDE DEHYDROGENASE YFMT	11	0.34386
PTHR43576	ALPHA-L-ARABINOFURANOSIDASE C-RELATED	17	0.344691
PTHR41913	DUF1684 DOMAIN-CONTAINING PROTEIN	6	0.344714
PTHR39450	MOLYBDOPTERIN OXIDOREDUCTASE, 4FE-4S CLUSTER-BINDING SUBUNIT	7	0.344819
PTHR42729	OLIGO/DIPEPTIDE TRANSPORT, PERMEASE PROTEIN (DPPC-2)	10	0.345237
PTHR45783	KINESIN LIGHT CHAIN	169	0.345989
PTHR44298	DNAJ HOMOLOG SUBFAMILY B MEMBER 11	72	0.346025
PTHR10496	40S RIBOSOMAL PROTEIN S24	335	0.346041
PTHR36849	CYTOPLASMIC PROTEIN-RELATED	18	0.346101
PTHR37840	L-FUCOSE ISOMERASE	10	0.346119
PTHR42808	HYDROXYSTEROID DEHYDROGENASE-LIKE PROTEIN 2	100	0.346331
PTHR11807	ATPASES OF THE PP SUPERFAMILY-RELATED	220	0.346419
PTHR13048	TRAFFICKING PROTEIN PARTICLE COMPLEX SUBUNIT 3	252	0.346646
PTHR24072	RHO FAMILY GTPASE	2312	0.346758
PTHR43324	FAMILY NOT NAMED	6	0.346981
PTHR21012	ASPARTATE 1-DECARBOXYLASE	35	0.347036
PTHR11739	CITRATE SYNTHASE	427	0.347037
PTHR10052	60S RIBOSOMAL PROTEIN L18A	325	0.347458
PTHR24057	GLYCOGEN SYNTHASE KINASE-3 ALPHA	815	0.347585
PTHR43269	SODIUM/PROTON ANTIPORTER 1-RELATED	101	0.347723
PTHR35806	OXALOACETATE DECARBOXYLASE BETA CHAIN 2	15	0.347771
PTHR39199	BLR5128 PROTEIN	11	0.347826
PTHR32325	BETA-ELIMINATING LYASE-LIKE PROTEIN-RELATED	15	0.348096
PTHR30456	PYRIDOXINE 5'-PHOSPHATE SYNTHASE	23	0.348501
PTHR10099	PHOSPHORIBOSYLFORMYLGLYCINAMIDINE SYNTHASE	222	0.348696
PTHR10335	RRNA 2-O-METHYLTRANSFERASE FIBRILLARIN	306	0.348712
PTHR48360	MUTL PROTEIN ISOFORM 1	17	0.348747
PTHR43698	RIBD C-TERMINAL DOMAIN CONTAINING PROTEIN	20	0.349085
PTHR47958	ATP-DEPENDENT RNA HELICASE DBP3	3504	0.349343
PTHR43342	NADH-QUINONE OXIDOREDUCTASE, E SUBUNIT	15	0.349356
PTHR43388	HYDROGENASE MATURATION FACTOR HOXX	14	0.349375
PTHR42637	TRNA-(MS[2]IO[6]A)-HYDROXYLASE	6	0.349649
PTHR23305	OBG GTPASE FAMILY	427	0.349836
PTHR11815	SUCCINYL-COA SYNTHETASE BETA CHAIN	352	0.349964
PTHR46141	SODIUM LEAK CHANNEL NON-SELECTIVE PROTEIN	67	0.350197
PTHR42780	SOLEUCYL-TRNA SYNTHETASE	226	0.351021
PTHR30083	UNCHARACTERIZED	16	0.351151
PTHR30447	FRUCTOSE-1,6-BISPHOSPHATASE CLASS 2	28	0.351201
PTHR15238	54S RIBOSOMAL PROTEIN L39, MITOCHONDRIAL	114	0.351272
PTHR43382	PROLYL-TRNA SYNTHETASE	351	0.351637
PTHR43446	MEMBRANE PROTEIN-RELATED	10	0.351676
PTHR24029	UVRABC SYSTEM PROTEIN B	54	0.351831
PTHR11902	ENOLASE	658	0.351892
PTHR36010	CYTOCHROME C BIOGENESIS CCMF C-TERMINAL-LIKE MITOCHONDRIAL PROTEIN-RELATED	65	0.351905
PTHR11880	RIBOSOMAL PROTEIN S19P FAMILY MEMBER	584	0.351998
PTHR40733	ZINC-RIBBON RNA-BINDING PROTEIN INVOLVED IN TRANSLATION-RELATED	8	0.352092
PTHR10619	F-ACTIN-CAPPING PROTEIN SUBUNIT BETA	194	0.352275
PTHR35534	50S RIBOSOMAL PROTEIN L32	28	0.352322
PTHR11550	CTP SYNTHASE	501	0.352608
PTHR30525	1-DEOXY-D-XYLULOSE 5-PHOSPHATE REDUCTOISOMERASE	147	0.352634
PTHR21231	XPA-BINDING PROTEIN 1-RELATED	642	0.352708
PTHR45697	ADP-RIBOSYLATION FACTOR-LIKE PROTEIN 2-RELATED	329	0.352763
PTHR10210	RIBOSE-PHOSPHATE DIPHOSPHOKINASE FAMILY MEMBER	813	0.352768
PTHR22599	MPS ONE BINDER KINASE ACTIVATOR-LIKE MOB	693	0.352979
PTHR43314	FAMILY NOT NAMED	244	0.352997
PTHR10871	30S RIBOSOMAL PROTEIN S13/40S RIBOSOMAL PROTEIN S18	612	0.353495
PTHR38492	ADROPIN	18	0.353511
PTHR11692	BIFUNCTIONAL PURINE BIOSYNTHESIS PROTEIN PURH	261	0.353847
PTHR43318	UDP-N-ACETYLGLUCOSAMINE 4,6-DEHYDRATASE	36	0.354084
PTHR47199	PHOTOSYSTEM II STABILITY/ASSEMBLY FACTOR HCF136, CHLOROPLASTIC	87	0.354103
PTHR42821	CATALASE	34	0.354159
PTHR43150	HYPERKINETIC, ISOFORM M	292	0.354361
PTHR47756	BLL6612 PROTEIN-RELATED	10	0.354668
PTHR11630	DNA REPLICATION LICENSING FACTOR MCM FAMILY MEMBER	1610	0.354707
PTHR39185	SWARMING MOTILITY PROTEIN SWRD	7	0.35481
PTHR46982	CITRATE/OXOGLUTARATE CARRIER PROTEIN	36	0.35484
PTHR10943	26S PROTEASOME NON-ATPASE REGULATORY SUBUNIT	500	0.354859
PTHR21225	PHOSPHO-2-DEHYDRO-3-DEOXYHEPTONATE ALDOLASE DAHP SYNTHETASE	99	0.354966
PTHR33354	ENDONUCLEASE/EXONUCLEASE/PHOSPHATASE FAMILY PROTEIN (AFU_ORTHOLOGUE AFUA_1G01540)	5	0.355213
PTHR10031	ATP SYNTHASE LIPID-BINDING PROTEIN, MITOCHONDRIAL	466	0.355215
PTHR45866	DNA GYRASE/TOPOISOMERASE SUBUNIT B	181	0.355235
PTHR30523	PHOSPHOENOLPYRUVATE CARBOXYLASE	391	0.355619
PTHR43721	ELONGATION FACTOR TU-RELATED	695	0.355842
PTHR40101	CONSERVED PROTEIN	7	0.355946
PTHR30607	POTASSIUM-TRANSPORTING ATPASE A CHAIN	26	0.356292
PTHR19376	DNA-DIRECTED RNA POLYMERASE	948	0.356306
PTHR10755	COPROPORPHYRINOGEN III OXIDASE, MITOCHONDRIAL	234	0.356309
PTHR46334	COSTARS FAMILY PROTEIN ABRACL	138	0.356381
PTHR42818	SULFOPYRUVATE DECARBOXYLASE SUBUNIT ALPHA	12	0.356453
PTHR31209	COFACTOR-INDEPENDENT PHOSPHOGLYCERATE MUTASE	128	0.356772
PTHR38657	SLR1343 PROTEIN	10	0.356926
PTHR28632	TRANSLATION MACHINERY-ASSOCIATED PROTEIN 7	173	0.356938
PTHR37467	EXPORTED CALCIUM-BINDING GLYCOPROTEIN-RELATED	1	0.357143
PTHR43067	OLIGOPEPTIDE/DIPEPTIDE ABC TRANSPORTER, ATPASE SUBUNIT	14	0.357326
PTHR28525	REACTIVE OXYGEN SPECIES MODULATOR 1	189	0.357342
PTHR42979	3-ISOPROPYLMALATE DEHYDROGENASE	174	0.35748
PTHR21010	AGAP001581-PA	8	0.357548
PTHR43816	NICOTINAMIDE PHOSPHORIBOSYLTRANSFERASE	69	0.357564
PTHR12146	40S RIBOSOMAL PROTEIN S10	322	0.357643
PTHR43217	SUCCINATE SEMIALDEHYDE DEHYDROGENASE [NAD(P)+] SAD	30	0.35783
PTHR23152	2-OXOGLUTARATE DEHYDROGENASE	413	0.358026
PTHR43125	INOSITOL-3-PHOSPHATE SYNTHASE	18	0.358032
PTHR43064	PHOSPHORIBOSYLAMINOIMIDAZOLE CARBOXYLASE-RELATED	18	0.358163
PTHR47799	OMEGA-AMIDASE YAFV	11	0.358167
PTHR36569	FAMILY NOT NAMED	15	0.358231
PTHR43865	RUBRERYTHRIN-RELATED	16	0.358304
PTHR43172	ADENYLOSUCCINATE LYASE	146	0.358339
PTHR11871	PROTEIN PHOSPHATASE PP2A REGULATORY SUBUNIT B	514	0.358355
PTHR11721	60S RIBOSOMAL PROTEIN L27A	355	0.358517
PTHR12098	E3 UBIQUITIN-PROTEIN LIGASE PELLINO-RELATED	136	0.358567
PTHR21407	RE43931P-RELATED	18	0.3588
PTHR39453	PHOSPHATE PROPANOYLTRANSFERASE	8	0.358832
PTHR36520	PROTEIN CBG13000-RELATED	17	0.359155
PTHR37948	ZGC:113208	12	0.359195
PTHR11606	GLUTAMATE DEHYDROGENASE	408	0.359231
PTHR47790	TRNA/TMRNA (URACIL-C(5))-METHYLTRANSFERASE	11	0.359431
PTHR43638	OXIDOREDUCTASE, ALDO/KETO REDUCTASE FAMILY PROTEIN	17	0.359463
PTHR40663	FAMILY NOT NAMED	7	0.359909
PTHR43152	UVRABC SYSTEM PROTEIN A	77	0.359978
PTHR48084	2-OXOGLUTARATE OXIDOREDUCTASE SUBUNIT KORB-RELATED	49	0.360086
PTHR33149	PHOTOSYSTEM II PROTEIN D1	218	0.360097
PTHR15859	SETA BINDING PROTEIN 1	103	0.360211
PTHR43500	CYSTATHIONINE BETA-LYASE-RELATED	8	0.360274
PTHR40400	SLR1512 PROTEIN	8	0.360326
PTHR11587	ARGININOSUCCINATE SYNTHASE	259	0.36034
PTHR37168	CRISPR-ASSOCIATED EXONUCLEASE CAS4	12	0.360475
PTHR43322	1-D-DEOXYXYLULOSE 5-PHOSPHATE SYNTHASE-RELATED	329	0.360476
PTHR46417	TRNA (GUANINE-N(1)-)-METHYLTRANSFERASE	47	0.360832
PTHR42658	FAMILY NOT NAMED	6	0.36102
PTHR21213	GEO09665P1-RELATED	252	0.361487
PTHR36540	PYRIMIDINE/PURINE NUCLEOSIDE PHOSPHORYLASE	15	0.361528
PTHR46138	PROTEIN DR1	104	0.36154
PTHR42849	N-ACETYLNEURAMINATE LYASE	12	0.361642
PTHR46668	BTB/POZ DOMAIN AND ANKYRIN REPEAT-CONTAINING PROTEIN NH5.2	150	0.361645
PTHR36116	UPF0060 MEMBRANE PROTEIN YNFA	30	0.36172
PTHR12826	RIBONUCLEASE Y	263	0.361723
PTHR11772	ASPARAGINE SYNTHETASE	349	0.361729
PTHR43641	FORMATE ACETYLTRANSFERASE 3-RELATED	17	0.361941
PTHR10956	60S RIBOSOMAL PROTEIN L31	372	0.362167
PTHR45722	60S RIBOSOMAL PROTEIN L35	338	0.362183
PTHR30446	RECOMBINATION PROTEIN RECR	44	0.362287
PTHR35984	PERIPLASMIC SERINE PROTEASE	16	0.362369
PTHR10126	TATA-BOX BINDING PROTEIN	439	0.362732
PTHR43831	ISOBUTYRYL-COA DEHYDROGENASE	83	0.36284
PTHR21091	METHYLTETRAHYDROFOLATE:HOMOCYSTEINE METHYLTRANSFERASE RELATED	320	0.363014
PTHR36029	TSET COMPLEX MEMBER TSTA	88	0.363268
PTHR39661	UPF0310 PROTEIN MJECL36	5	0.363369
PTHR41709	KAIB-LIKE PROTEIN 1	5	0.363636
PTHR41173	UPF0278 PROTEIN TK1425	7	0.363667
PTHR47709	SHORT TRANSMEMBRANE MITOCHONDRIAL PROTEIN 1	26	0.363669
PTHR23046	PHOSPHORIBOSYLAMINOIMIDAZOLE CARBOXYLASE CATALYTIC SUBUNIT	60	0.36376
PTHR35799	S-RIBOSYLHOMOCYSTEINE LYASE	22	0.363864
PTHR45671	SOLUTE CARRIER FAMILY 25 (MITOCHONDRIAL CARRIER PHOSPHATE CARRIER), MEMBER 3, LIKE-RELATED-RELATED	499	0.364068
PTHR38666	FAMILY NOT NAMED	15	0.364069
PTHR35458	SLR0755 PROTEIN	20	0.36407
PTHR42902	MALATE SYNTHASE	169	0.364136
PTHR10497	60S RIBOSOMAL PROTEIN L27	311	0.364228
PTHR11638	ATP-DEPENDENT CLP PROTEASE	717	0.364259
PTHR31682	UDP-ARABINOSE MUTASE	404	0.364284
PTHR18847	20 KD NUCLEAR CAP BINDING PROTEIN	215	0.364328
PTHR43181	2-C-METHYL-D-ERYTHRITOL 2,4-CYCLODIPHOSPHATE SYNTHASE, CHLOROPLASTIC	135	0.364546
PTHR48164	DOLICHYL-DIPHOSPHOOLIGOSACCHARIDE--PROTEIN GLYCOSYLTRANSFERASE SUBUNIT 4	40	0.364897
PTHR37749	TRANSMEMBRANE PROTEIN	72	0.365136
PTHR42867	MEMBRANE PROTEIN-RELATED	17	0.365212
PTHR17008	MEIOSIS-EXPRESSED GENE 1 PROTEIN	48	0.365376
PTHR43521	ALPHA-AMINOADIPIC SEMIALDEHYDE DEHYDROGENASE	277	0.365434
PTHR11071	PEPTIDYL-PROLYL CIS-TRANS ISOMERASE	990	0.365648
PTHR11548	THYMIDYLATE SYNTHASE 1	266	0.365651
PTHR43356	PHOSPHATE ACETYLTRANSFERASE	66	0.365802
PTHR37463	GSL3115 PROTEIN	14	0.365854
PTHR30458	PHENYLACETIC ACID DEGRADATION PROTEIN PAA	11	0.366018
PTHR11922	GMP SYNTHASE-RELATED	348	0.366076
PTHR11465	CATALASE	415	0.366149
PTHR47448	DUAL SPECIFICITY MITOGEN-ACTIVATED PROTEIN KINASE KINASE DSOR1-LIKE PROTEIN	48	0.366763
PTHR34310	DUF427 DOMAIN PROTEIN (AFU_ORTHOLOGUE AFUA_3G02220)	24	0.366876
PTHR41878	LEXA REPRESSOR-RELATED	2	0.367094
PTHR11711	ADP RIBOSYLATION FACTOR-RELATED	1964	0.367216
PTHR11458	DELTA-AMINOLEVULINIC ACID DEHYDRATASE	254	0.367537
PTHR46278	DEHYDROGENASE, PUTATIVE-RELATED	152	0.367615
PTHR30503	UNCHARACTERIZED	12	0.36781
PTHR38839	TRANSCRIPTIONAL REGULATOR WHID-RELATED	14	0.367821
PTHR43410	NITRIC OXIDE SYNTHASE OXYGENASE	11	0.367908
PTHR30013	NIFE / NIFESE HYDROGENASE SMALL SUBUNIT FAMILY MEMBER	28	0.367966
PTHR38662	FAMILY NOT NAMED	8	0.368024
PTHR13229	PROTEIN KISH-A	192	0.36824
PTHR30578	ELECTRON TRANSPORT COMPLEX PROTEIN RNFD	31	0.368272
PTHR39650	CDP-ARCHAEOL SYNTHASE	9	0.368306
PTHR39201	EXPORTED PROTEIN-RELATED	6	0.36832
PTHR21272	CATABOLIC 3-DEHYDROQUINASE	45	0.368411
PTHR10410	EUKARYOTIC TRANSLATION INITIATION FACTOR 3 -RELATED	872	0.368564
PTHR30476	UNCHARACTERIZED	24	0.368583
PTHR43063	4FE-4S CLUSTER CONTAINING PARA FAMILY ATPASE PROTEIN	5	0.368664
PTHR37559	PAREP6 PART 2, AUTHENTIC FRAMESHIFT	10	0.368748
PTHR39175	FAMILY PROTEIN, PUTATIVE (AFU_ORTHOLOGUE AFUA_3G15060)-RELATED	16	0.369026
PTHR23001	EUKARYOTIC TRANSLATION INITIATION FACTOR	559	0.369082
PTHR11846	ADENYLOSUCCINATE SYNTHETASE	347	0.36919
PTHR43321	GLUTAMATE DECARBOXYLASE	358	0.369306
PTHR43134	SIGNAL RECOGNITION PARTICLE RECEPTOR SUBUNIT ALPHA	402	0.369368
PTHR30406	SULFATE TRANSPORT SYSTEM PERMEASE PROTEIN	55	0.369412
PTHR43422	THIAMINE THIAZOLE SYNTHASE	183	0.369708
PTHR30252	INNER MEMBRANE PEPTIDE TRANSPORTER	35	0.369965
PTHR42833	URIDYLATE KINASE	245	0.369994
PTHR45637	FLIPPASE KINASE 1-RELATED	1551	0.370071
PTHR11556	FRUCTOSE-1,6-BISPHOSPHATASE-RELATED	625	0.370144
PTHR45229	CONSTITUTIVE ORNITHINE DECARBOXYLASE	13	0.370185
PTHR45995	FAMILY NOT NAMED	175	0.370219
PTHR30308	TMRNA-BINDING COMPONENT OF TRANS-TRANSLATION TAGGING COMPLEX	52	0.370376
PTHR43238	GDP-L-FUCOSE SYNTHASE	204	0.370397
PTHR30615	UNCHARACTERIZED PROTEIN YJBQ-RELATED	212	0.370458
PTHR11671	V-TYPE ATP SYNTHASE SUBUNIT D	262	0.370502
PTHR47486	SIALYLTRANSFERASE-LIKE PROTEIN 1	86	0.370506
PTHR43718	LON PROTEASE	219	0.370528
PTHR11608	BIFUNCTIONAL PROTEIN PYRR	30	0.370756
PTHR11824	VOLTAGE-DEPENDENT CALCIUM CHANNEL BETA SUBUNIT	192	0.370996
PTHR28622	SMALL INTEGRAL MEMBRANE PROTEIN 7	39	0.371
PTHR18919	ACETYL-COA C-ACYLTRANSFERASE	624	0.371192
PTHR38659	METAL-DEPENDENT PHOSPHOHYDROLASE	13	0.371227
PTHR23264	NUCLEOTIDE-BINDING PROTEIN NBP35 YEAST -RELATED	341	0.371466
PTHR39289	FAMILY NOT NAMED	1	0.371756
PTHR39465	DNA LIGASE D, 3'-PHOSPHOESTERASE DOMAIN	11	0.371867
PTHR42974	GLUTAMINE SYNTHETASE	19	0.37187
PTHR19211	ATP-BINDING TRANSPORT PROTEIN-RELATED	958	0.372125
PTHR43253	TRICORN PROTEASE HOMOLOG 2-RELATED	2	0.372304
PTHR22931	PHOSPHOENOLPYRUVATE DIKINASE-RELATED	150	0.372428
PTHR43411	ADENYLOSUCCINATE LYASE	125	0.372685
PTHR31789	OS05G0482600 PROTEIN	189	0.373085
PTHR23105	RIBOSOMAL PROTEIN L7AE FAMILY MEMBER	1355	0.37361
PTHR38147	5-FORMAMINOIMIDAZOLE-4-CARBOXAMIDE-1-(BETA)-D-RIBOFURANOSYL 5'-MONOPHOSPHATE SYNTHETASE-RELATED	18	0.373629
PTHR19877	EUKARYOTIC TRANSLATION INITIATION FACTOR 3 SUBUNIT I	436	0.37364
PTHR30387	MANNONATE DEHYDRATASE	15	0.37379
PTHR31637	2,3-BISPHOSPHOGLYCERATE-INDEPENDENT PHOSPHOGLYCERATE MUTASE	214	0.374477
PTHR10745	GLYCYL-TRNA SYNTHETASE/DNA POLYMERASE SUBUNIT GAMMA-2	313	0.374574
PTHR46177	INTEGRASE CATALYTIC DOMAIN-CONTAINING PROTEIN	44	0.374677
PTHR11673	TRANSLATION INITIATION FACTOR 5A FAMILY MEMBER	438	0.374827
PTHR35375	NEMATODE SPECIFIC PEPTIDE FAMILY, GROUP D	15	0.374934
PTHR48343	TRANSMEMBRANE PROTEIN 250	34	0.375
PTHR15601	STRESS ASSOCIATED ENDOPLASMIC RETICULUM PROTEIN SERP1/RAMP4	274	0.375232
PTHR42970	PECTATE LYASE C-RELATED	12	0.375289
PTHR45687	AQUAPORIN OR AQUAGLYCEROPORIN RELATED	869	0.375346
PTHR44379	OXIDOREDUCTASE WITH IRON-SULFUR SUBUNIT	35	0.375399
PTHR12665	ORMDL PROTEINS	341	0.375541
PTHR46568	ALKYLDIHYDROXYACETONEPHOSPHATE SYNTHASE, PEROXISOMAL	79	0.375645
PTHR12056	DNA-DIRECTED RNA POLYMERASES I, II, AND III	194	0.375666
PTHR10571	UDP-N-ACETYLGLUCOSAMINE--DOLICHYL-PHOSPHATE N-ACETYLGLUCOSAMINEPHOSPHOTRANSFERASE	215	0.375696
PTHR42697	ENDONUCLEASE 8	17	0.375732
PTHR45728	ACETYL-COA CARBOXYLASE, ISOFORM A	257	0.375961
PTHR42995	ACETYL-COENZYME A CARBOXYLASE CARBOXYL TRANSFERASE SUBUNIT BETA, CHLOROPLASTIC	100	0.375965
PTHR43075	FORMATE LYASE ACTIVATING ENZYME, PUTATIVE (AFU_ORTHOLOGUE AFUA_2G15630)-RELATED	19	0.376135
PTHR47786	ALPHA-1,4-GLUCAN:MALTOSE-1-PHOSPHATE MALTOSYLTRANSFERASE	17	0.376179
PTHR40099	ACETOLACTATE SYNTHASE, SMALL SUBUNIT	8	0.376325
PTHR41752	FAMILY NOT NAMED	10	0.376671
PTHR10466	PHOSPHOMANNOMUTASE	274	0.377035
PTHR11469	GLUCOSE-6-PHOSPHATE ISOMERASE	356	0.377094
PTHR34354	NADPH-DEPENDENT 7-CYANO-7-DEAZAGUANINE REDUCTASE	33	0.377116
PTHR10314	CYSTATHIONINE BETA-SYNTHASE	1231	0.377268
PTHR45770	ATP-DEPENDENT 6-PHOSPHOFRUCTOKINASE 1	557	0.377269
PTHR46385	PAIRED MESODERM HOMEOBOX PROTEIN 1-RELATED	66	0.377498
PTHR47806	50S RIBOSOMAL PROTEIN L3 GLUTAMINE METHYLTRANSFERASE	12	0.37756
PTHR30473	PROTEIN PHOH	56	0.378003
PTHR43846	UPF0176 PROTEIN YCEA	11	0.378186
PTHR11655	60S/50S RIBOSOMAL PROTEIN L6/L9	570	0.378379
PTHR10889	DEOXYRIBOSE-PHOSPHATE ALDOLASE	126	0.378395
PTHR33449	NUCLEOID-ASSOCIATED PROTEIN YBAB	161	0.378473
PTHR42240	DUF211 DOMAIN-CONTAINING PROTEIN	7	0.378537
PTHR10160	NAD(P) TRANSHYDROGENASE	117	0.378616
PTHR38674	ALKANE 1-MONOOXYGENASE 1	1	0.37876
PTHR30149	HYDROGENASE PROTEIN ASSEMBLY PROTEIN HYPD	24	0.3789
PTHR12377	UNCHARACTERIZED	373	0.379218
PTHR37945	EXTRACELLULAR TUNGSTATE BINDING PROTEIN	15	0.379229
PTHR11806	GLUCOSE INHIBITED DIVISION PROTEIN A	229	0.379293
PTHR31610	SLR0360 PROTEIN	8	0.379341
PTHR34389	L-RHAMNOSE MUTAROTASE	19	0.379377
PTHR28677	DOLICHYL-DIPHOSPHOOLIGOSACCHARIDE--PROTEIN GLYCOSYLTRANSFERASE SUBUNIT 4A-RELATED	87	0.379596
PTHR43030	PHOSPHOENOLPYRUVATE SYNTHASE	40	0.379657
PTHR38455	HYPOTHETICAL CYTOSOLIC PROTEIN	13	0.37991
PTHR37301	DNA-BINDING PROTEIN-RELATED	17	0.379972
PTHR43306	7,8-DIHYDRO-6-HYDROXYMETHYLPTERIN DIMETHYLTRANSFERASE	14	0.380303
PTHR11349	NUCLEOSIDE DIPHOSPHATE KINASE	632	0.380398
PTHR45942	PROTEIN PHOSPATASE 3 REGULATORY SUBUNIT B ALPHA ISOFORM TYPE 1	135	0.380409
PTHR11274	RAD25/XP-B DNA REPAIR HELICASE	253	0.380461
PTHR13872	DOLICHYL-DIPHOSPHOOLIGOSACCHARIDE--PROTEIN GLYCOSYLTRANSFERASE SUBUNIT	398	0.380549
PTHR36443	BSR5223 PROTEIN	14	0.380701
PTHR45673	SERINE/THREONINE-PROTEIN PHOSPHATASE 2B CATALYTIC SUBUNIT 1-RELATED	223	0.380766
PTHR45678	MITOCHONDRIAL 2-OXODICARBOXYLATE CARRIER 1-RELATED	277	0.38112
PTHR10925	N-ACETYLTRANSFERASE 10	222	0.381334
PTHR11406	PHOSPHOGLYCERATE KINASE	508	0.381337
PTHR43559	HYDROLASE YCAC-RELATED	33	0.381371
PTHR10572	3-HYDROXY-3-METHYLGLUTARYL-COENZYME A REDUCTASE	387	0.381409
PTHR10920	RIBOSOMAL RNA METHYLTRANSFERASE	656	0.38141
PTHR24056	CELL DIVISION PROTEIN KINASE	4052	0.381779
PTHR42826	DICARBOXYLATE TRANSPORTER 2.1, CHLOROPLASTIC	235	0.38201
PTHR43044	FAMILY NOT NAMED	7	0.382108
PTHR39963	SLL0983 PROTEIN	4	0.382219
PTHR36106	ANAEROBIC C4-DICARBOXYLATE TRANSPORTER DCUB	21	0.382282
PTHR39209	FAMILY NOT NAMED	6	0.382358
PTHR10261	COATOMER SUBUNIT GAMMA	270	0.382497
PTHR30109	HYDROXYLAMINE REDUCTASE	41	0.382634
PTHR11540	MALATE AND LACTATE DEHYDROGENASE	603	0.382883
PTHR19868	RECEPTOR FOR ACTIVATED PROTEIN KINASE C RACK1	279	0.383017
PTHR44998	FAMILY NOT NAMED	100	0.383068
PTHR42853	ACETYL-COENZYME A CARBOXYLASE CARBOXYL TRANSFERASE SUBUNIT ALPHA	152	0.383076
PTHR43472	PHOSPHORIBOSYLAMINE--GLYCINE LIGASE	155	0.38311
PTHR44419	PROTOCHLOROPHYLLIDE REDUCTASE C, CHLOROPLASTIC	178	0.38314
PTHR10442	40S RIBOSOMAL PROTEIN S21	288	0.383211
PTHR43239	UPF0734 PROTEIN DDB_G0273871/DDB_G0273177	11	0.38355
PTHR35281	BNAA02G34170D PROTEIN	72	0.383724
PTHR31862	UPF0261 DOMAIN PROTEIN (AFU_ORTHOLOGUE AFUA_1G10120)	100	0.383801
PTHR14194	NITROGEN METABOLIC REGULATION PROTEIN NMR-RELATED	117	0.383869
PTHR42206	METAL-DEPENDENT HYDROLASE-RELATED	6	0.384089
PTHR10739	CYTIDYLYLTRANSFERASE	308	0.384474
PTHR11921	SUCCINATE DEHYDROGENASE IRON-SULFUR PROTEIN	346	0.384475
PTHR15588	LSM1	442	0.384727
PTHR32319	BACTERIAL HEMOLYSIN-LIKE PROTEIN	116	0.385168
PTHR46029	C-TERMINAL-BINDING PROTEIN	116	0.38526
PTHR10371	NADH DEHYDROGENASE UBIQUINONE FLAVOPROTEIN 2, MITOCHONDRIAL	229	0.385279
PTHR41910	SUCCINATE DEHYDROGENASE 2 MEMBRANE SUBUNIT SDHC	7	0.385343
PTHR13047	PRE-MRNA CLEAVAGE FACTOR IM, 25KD SUBUNIT	282	0.385618
PTHR39330	ETHANOLAMINE AMMONIA-LYASE LIGHT CHAIN	10	0.385671
PTHR31744	PROTEIN CUP-SHAPED COTYLEDON 2-RELATED	1666	0.385914
PTHR33096	CXC2 DOMAIN-CONTAINING PROTEIN	3	0.385996
PTHR10790	TPR-DOMAIN CONTAINING PROTEIN	1	0.386014
PTHR10678	26S PROTEASOME NON-ATPASE REGULATORY SUBUNIT 11/COP9 SIGNALOSOME COMPLEX SUBUNIT 2	468	0.386068
PTHR16528	GOLGI-ASSOCIATED PDZ AND COILED-COIL MOTIF-CONTAINING	55	0.386071
PTHR11907	AMIDOPHOSPHORIBOSYLTRANSFERASE	298	0.38613
PTHR15936	GUANINE NUCLEOTIDE-BINDING PROTEIN G I /G S /G O GAMMA-13 SUBUNIT	47	0.386159
PTHR40734	TRNA-SPECIFIC ADENOSINE DEAMINASE-RELATED	10	0.386232
PTHR43860	BETAINE ALDEHYDE DEHYDROGENASE	131	0.386268
PTHR43613	ABC TRANSPORTER, ATP-BINDING PROTEIN	8	0.386361
PTHR10292	CLATHRIN HEAVY CHAIN RELATED	358	0.38643
PTHR11229	50S RIBOSOMAL PROTEIN L3	337	0.3865
PTHR37512	TRIFUNCTIONAL NAD BIOSYNTHESIS/REGULATOR PROTEIN NADR	11	0.386913
PTHR40067	UPF0297 PROTEIN YRZL	9	0.386995
PTHR37958	SODIUM-POTASSIUM/PROTON ANTIPORTER CHAA	11	0.387022
PTHR45950	HOMEOBOX-LEUCINE ZIPPER PROTEIN ATHB-14	402	0.387045
PTHR35404	TRANSPOSASE OF TN10	3	0.387055
PTHR32268	HOMOSERINE O-ACETYLTRANSFERASE	102	0.38736
PTHR36862	ZINC FINGER PROTEIN 428	22	0.38756
PTHR47916	FRUCTOSE-BISPHOSPHATE ALDOLASE CLASS 1	25	0.387616
PTHR14413	RIBOSOMAL PROTEIN L17	349	0.387669
PTHR42745	FAMILY NOT NAMED	21	0.387726
PTHR13691	RIBOSOMAL PROTEIN L2	670	0.387727
PTHR11937	ACTIN	3190	0.387763
PTHR47153	LACTATE UTILIZATION PROTEIN B	20	0.387781
PTHR42960	YCF46 PROTEIN	11	0.388206
PTHR45759	NUCLEOLAR GTP-BINDING PROTEIN 1	345	0.388223
PTHR36701	EPOXYQUEUOSINE REDUCTASE QUEH	12	0.388474
PTHR42692	NUCLEOTIDE PYROPHOSPHOHYDROLASE	15	0.388606
PTHR19271	CYTOCHROME B	291	0.388625
PTHR39447	ALPHA-L-ARABINOFURANOSIDASE B	12	0.388631
PTHR43555	PHOSPHORIBOSYLFORMYLGLYCINAMIDINE SYNTHASE SUBUNIT PURL	33	0.388712
PTHR10422	CYTOCHROME C OXIDASE SUBUNIT 1	209	0.388888
PTHR11918	RADICAL SAM PROTEINS	193	0.388985
PTHR28623	PROTEIN FAM118B	64	0.389196
PTHR11961	CYTOCHROME C	361	0.389286
PTHR42993	MAOC-LIKE DEHYDRATASE DOMAIN-CONTAINING PROTEIN	19	0.389312
PTHR30031	PHOSPHOENOLPYRUVATE CARBOXYKINASE ATP	280	0.389427
PTHR43764	MOLYBDENUM COFACTOR BIOSYNTHESIS	33	0.389556
PTHR45894	RNA-BINDING PROTEIN 8A	232	0.389557
PTHR43097	GLUTAMINE-TRNA LIGASE	416	0.389843
PTHR39962	BLL4848 PROTEIN	6	0.389948
PTHR35602	ESTERASE YQIA-RELATED	13	0.390229
PTHR10884	NADH DEHYDROGENASE UBIQUINONE IRON-SULFUR PROTEIN 3	279	0.39025
PTHR42945	HISTIDINE BIOSYNTHESIS BIFUNCTIONAL PROTEIN	150	0.39034
PTHR47981	RAB FAMILY	682	0.390356
PTHR11109	GTP CYCLOHYDROLASE I	264	0.390463
PTHR40447	ANAEROBIC SULFITE REDUCTASE SUBUNIT A	4	0.39049
PTHR35473	1-ACYL-SN-GLYCEROL-3-PHOSPHATE ACYLTRANSFERASE	78	0.390492
PTHR11203	CLEAVAGE AND POLYADENYLATION SPECIFICITY FACTOR FAMILY MEMBER	433	0.39058
PTHR10256	SELENIDE, WATER DIKINASE	132	0.390723
PTHR43195	TRANSKETOLASE	131	0.390823
PTHR47406	COAGULATION FACTOR 5/8 TYPE, C-TERMINAL	1	0.391065
PTHR35325	FAMILY NOT NAMED	89	0.391367
PTHR38456	CYCLIC DI-AMP RECEPTOR A	11	0.391418
PTHR30004	4-HYDROXYTHREONINE-4-PHOSPHATE DEHYDROGENASE	27	0.391469
PTHR37417	67 KDA MYOSIN-CROSS-REACTIVE ANTIGEN FAMILY PROTEIN (AFU_ORTHOLOGUE AFUA_5G09970)	18	0.391596
PTHR43522	TRANSKETOLASE	293	0.39168
PTHR12785	SPLICING FACTOR 3B	218	0.391728
PTHR30115	NITROGEN REGULATORY PROTEIN P-II	150	0.391823
PTHR38339	TRANSGLUTAMINASE DOMAIN PROTEIN	4	0.391847
PTHR43799	AMINOTRANSFERASE, PUTATIVE-RELATED	8	0.392006
PTHR45910	N-ALPHA-ACETYLTRANSFERASE 20	212	0.392147
PTHR43398	DOLICHOL-PHOSPHATE MANNOSYLTRANSFERASE SUBUNIT 1	244	0.392419
PTHR43488	GLUTAMATE-PYRUVATE AMINOTRANSFERASE ALAA	25	0.392532
PTHR22912	DISULFIDE OXIDOREDUCTASE	462	0.392564
PTHR35023	CHELATASE-RELATED	10	0.392617
PTHR36434	MEMBRANE PROTEASE YUGP-RELATED	15	0.392833
PTHR13718	RIBOSOMAL S SUBUNIT	593	0.392845
PTHR45871	N-ACETYLGLUCOSAMINYL-PHOSPHATIDYLINOSITOL BIOSYNTHETIC PROTEIN	210	0.392879
PTHR10529	AP COMPLEX SUBUNIT MU	1022	0.392982
PTHR37010	SULFURTRANSFERASE TUSE	13	0.392999
PTHR46933	MYB/SANT-LIKE DNA-BINDING DOMAIN-CONTAINING PROTEIN 2	37	0.393216
PTHR24055	MITOGEN-ACTIVATED PROTEIN KINASE	2903	0.393232
PTHR10351	TRANSCRIPTION FACTOR BTF3 FAMILY MEMBER	391	0.393244
PTHR42782	SI:CH73-314G15.3	185	0.393454
PTHR44924	DNAJ SUBFAMILY A MEMBER 2	16	0.393714
PTHR22734	U3 SMALL NUCLEOLAR RIBONUCLEOPROTEIN PROTEIN IMP4	419	0.393788
PTHR36965	FE(2+)-TRAFFICKING PROTEIN-RELATED	14	0.393902
PTHR11830	40S RIBOSOMAL PROTEIN S3A	426	0.393939
PTHR10705	DOLICHYL-DIPHOSPHOOLIGOSACCHARIDE--PROTEIN GLYCOSYLTRANSFERASE SUBUNIT DAD1	212	0.393988
PTHR31242	ACETOLACTATE SYNTHASE SMALL SUBUNIT, MITOCHONDRIAL	24	0.394033
PTHR24031	RNA HELICASE	3666	0.394212
PTHR42917	2,4-DIENOYL-COA REDUCTASE	23	0.394421
PTHR11749	RIBULOSE-5-PHOSPHATE-3-EPIMERASE	355	0.394476
PTHR13160	OLIGOSACCHARYLTRANSFERASE COMPLEX SUBUNIT OSTC	177	0.394489
PTHR12040	ANTI-SILENCING PROTEIN 1	305	0.394515
PTHR10381	ATP-DEPENDENT CLP PROTEASE PROTEOLYTIC SUBUNIT	1087	0.394519
PTHR18934	ATP-DEPENDENT RNA HELICASE	2879	0.394597
PTHR42775	PERMEASE RV2963-RELATED	12	0.394616
PTHR10625	HISTONE DEACETYLASE HDAC1-RELATED	1602	0.394625
PTHR19375	HEAT SHOCK PROTEIN 70KDA	2311	0.394695
PTHR41368	PROTEIN YGHO	5	0.394805
PTHR10814	TRANSDUCIN-LIKE ENHANCER PROTEIN	224	0.394841
PTHR43837	RIBOSOMAL PROTEIN S12 METHYLTHIOTRANSFERASE RIMO	29	0.394864
PTHR43844	METHIONINE SYNTHASE	21	0.395081
PTHR11359	AMP DEAMINASE	362	0.395139
PTHR39080	50S RIBOSOMAL PROTEIN L28	25	0.39545
PTHR10882	DIPHTHINE SYNTHASE	215	0.395502
PTHR33288	FAMILY NOT NAMED	173	0.395585
PTHR38464	L-ARABINOSE ISOMERASE	8	0.395632
PTHR43511	FAMILY NOT NAMED	283	0.395821
PTHR10476	CHARGED MULTIVESICULAR BODY PROTEIN	1007	0.39586
PTHR20919	HOMOSERINE O-SUCCINYLTRANSFERASE	18	0.395928
PTHR31273	PHOSPHOKETOLASE-RELATED	39	0.395948
PTHR11849	ETS	1297	0.395963
PTHR45772	CONSERVED COMPONENT OF ABC TRANSPORTER FOR NATURAL AMINO ACIDS-RELATED	116	0.396016
PTHR11722	60S RIBOSOMAL PROTEIN L13	318	0.396392
PTHR42767	ENDO-BETA-1,6-GALACTANASE	15	0.396546
PTHR46359	GEO07743P1	69	0.396645
PTHR43470	PHOSPHATE TRANSPORT SYSTEM PERMEASE PROTEIN PSTA-RELATED	35	0.396882
PTHR32092	6-PHOSPHO-BETA-GLUCOSIDASE-RELATED	36	0.396889
PTHR42989	HYDROGENASE-4 COMPONENT I	16	0.397166
PTHR42856	ACYL-COENZYME A THIOESTERASE PAAI	8	0.397238
PTHR43232	MOLYBDENUM COFACTOR BIOSYNTHESIS PROTEIN B	28	0.397272
PTHR43465	DUF1680 DOMAIN PROTEIN (AFU_ORTHOLOGUE AFUA_1G08910)	12	0.397418
PTHR45900	RECA	319	0.397532
PTHR47735	POTASSIUM VOLTAGE-GATED CHANNEL SUBFAMILY KQT MEMBER 4	125	0.397642
PTHR12884	60S RIBOSOMAL PROTEIN L29	275	0.397938
PTHR43825	PYRUVATE DEHYDROGENASE E1 COMPONENT	56	0.397951
PTHR11377	N-MYRISTOYL TRANSFERASE	300	0.397954
PTHR12391	ARP2/3 COMPLEX 21 KD SUBUNIT	235	0.398009
PTHR30508	FES CLUSTER ASSEMBLY PROTEIN SUF	144	0.39802
PTHR24095	ACETYL-COENZYME A SYNTHETASE	371	0.398122
PTHR42971	TRNA (CYTIDINE(34)-2'-O)-METHYLTRANSFERASE	113	0.398261
PTHR33187	WU:FI09B08	101	0.398272
PTHR13005	CYSTEINE-RICH HYDROPHOBIC DOMAIN PROTEIN BRAIN X-LINKED PROTEIN	99	0.39829
PTHR31876	COV-LIKE PROTEIN 1	333	0.398323
PTHR47439	LOW MOLECULAR WEIGHT PHOSPHOTYROSINE PROTEIN PHOSPHATASE-RELATED	93	0.398583
PTHR38761	GLUTAMATE--CYSTEINE LIGASE	10	0.398758
PTHR18860	14-3-3 PROTEIN	1237	0.398773
PTHR40704	TRANSCRIPTION ELONGATION FACTOR SPT4	10	0.398897
PTHR41774	FAMILY NOT NAMED	19	0.399265
PTHR47980	LD44762P	1042	0.399414
PTHR43345	3-ISOPROPYLMALATE DEHYDRATASE SMALL SUBUNIT 2-RELATED-RELATED	161	0.399495
PTHR30341	SODIUM ION/PROTON ANTIPORTER NHAA-RELATED	19	0.399498
PTHR34784	50S RIBOSOMAL PROTEIN L34	90	0.39954
PTHR10986	39S RIBOSOMAL PROTEIN L20	300	0.39962
PTHR47788	POLYA POLYMERASE	8	0.399646
PTHR11056	HOMOGENTISATE 1,2-DIOXYGENASE	205	0.39988
PTHR43760	ENDORIBONUCLEASE-RELATED	24	0.400037
PTHR11934	RIBOSE-5-PHOSPHATE ISOMERASE	146	0.400201
PTHR39573	STRESS RESPONSE KINASE A	9	0.400386
PTHR12734	METHYLTRANSFERASE-RELATED	218	0.400628
PTHR12611	PUR-TRANSCRIPTIONAL ACTIVATOR	232	0.400674
PTHR21139	TRIOSEPHOSPHATE ISOMERASE	469	0.400677
PTHR45564	NAD(P)H-QUINONE OXIDOREDUCTASE SUBUNIT 2 B, CHLOROPLASTIC	63	0.400678
PTHR10701	SMALL NUCLEAR RIBONUCLEOPROTEIN-ASSOCIATED PROTEIN B AND N	429	0.400728
PTHR46399	B30.2/SPRY DOMAIN-CONTAINING PROTEIN	103	0.401094
PTHR33569	UREASE	67	0.401155
PTHR23429	GLUCOSE-6-PHOSPHATE 1-DEHYDROGENASE G6PD	598	0.401208
PTHR31226	TRANSMEMBRANE PROTEIN 117	43	0.401229
PTHR38814	ENDONUCLEASE NUCS	11	0.401367
PTHR10061	S-FORMYLGLUTATHIONE HYDROLASE	201	0.401398
PTHR35170	PROTEIN DD3-3	27	0.401658
PTHR43853	3-KETOACYL-COA THIOLASE, PEROXISOMAL	339	0.401662
PTHR45635	ADP,ATP CARRIER PROTEIN 1-RELATED-RELATED	743	0.401695
PTHR11703	DEOXYHYPUSINE SYNTHASE	245	0.402199
PTHR45863	SERINE/THREONINE-PROTEIN KINASE BSK5	568	0.402218
PTHR12581	HIV-1 REV BINDING PROTEIN 2, 3	218	0.402652
PTHR13107	N6-ADENOSINE-METHYLTRANSFERASE NON-CATALYTIC SUBUNIT	156	0.403115
PTHR30133	CATIONIC AMINO ACID TRANSPORTER, MEMBRANE COMPONENT	15	0.403277
PTHR30573	QUINOLINATE SYNTHETASE A	140	0.40341
PTHR30314	CELL DIVISION PROTEIN FTSZ-RELATED	338	0.403542
PTHR10906	SECY/SEC61-ALPHA FAMILY MEMBER	602	0.40381
PTHR46157	K(+) EFFLUX ANTIPORTER 3, CHLOROPLASTIC	213	0.403922
PTHR40706	RIBOFLAVIN KINASE	10	0.404067
PTHR40703	TRNA (PSEUDOURIDINE(54)-N(1))-METHYLTRANSFERASE	5	0.404203
PTHR30390	SEDOHEPTULOSE 7-PHOSPHATE ISOMERASE / DNAA INITIATOR-ASSOCIATING FACTOR FOR REPLICATION INITIATION	40	0.404265
PTHR40255	UPF0093 MEMBRANE PROTEIN SLR1790	11	0.404475
PTHR41791	SSL7039 PROTEIN	7	0.404606
PTHR42907	FMN-LINKED OXIDOREDUCTASES SUPERFAMILY PROTEIN	121	0.40462
PTHR14552	FAMILY NOT NAMED	249	0.404892
PTHR11931	PHOSPHOGLYCERATE MUTASE	370	0.405587
PTHR38453	CYTOPLASMIC PROTEIN-RELATED	10	0.405643
PTHR38468	SLL0939 PROTEIN	10	0.405879
PTHR34984	CARBON STORAGE REGULATOR	24	0.405926
PTHR48188	60S RIBOSOMAL PROTEIN L43	83	0.405975
PTHR36512	D-AMINOPEPTIDASE	15	0.405986
PTHR47330	POLY(U)-BINDING-SPLICING FACTOR PUF60-B-RELATED	70	0.406053
PTHR43363	HYPOXANTHINE PHOSPHORIBOSYLTRANSFERASE	46	0.406147
PTHR22572	SUGAR-1-PHOSPHATE GUANYL TRANSFERASE	560	0.406287
PTHR13116	UNCHARACTERIZED	221	0.406437
PTHR47476	FAMILY NOT NAMED	85	0.406458
PTHR42738	HYDROXYMETHYLGLUTARYL-COA LYASE	309	0.406628
PTHR41294	CADMIUM-INDUCED PROTEIN CADI	9	0.406633
PTHR24356	SERINE/THREONINE-PROTEIN KINASE	2736	0.406744
PTHR35793	INNER MEMBRANE PROTEIN YJIG	14	0.406834
PTHR41729	GLUTAMYL-TRNA SYNTHETASE	10	0.406939
PTHR43020	CDK5 REGULATORY SUBUNIT-ASSOCIATED PROTEIN 1	202	0.40712
PTHR36987	NADH DEHYDROGENASE [UBIQUINONE] 1 BETA SUBCOMPLEX SUBUNIT 2-LIKE	90	0.407173
PTHR34732	69 KDA PARAFLAGELLAR ROD PROTEIN-RELATED	11	0.407184
PTHR23074	AAA DOMAIN-CONTAINING	1187	0.407362
PTHR11728	GLYCEROL-3-PHOSPHATE DEHYDROGENASE	567	0.407435
PTHR10277	HOMOCITRATE SYNTHASE-RELATED	250	0.407579
PTHR11278	40S RIBOSOMAL PROTEIN S7	322	0.407735
PTHR13930	S-ADENOSYL-L-METHIONINE-DEPENDENT TRNA 4-DEMETHYLWYOSINE SYNTHASE	179	0.407748
PTHR30239	ACETOLACTATE SYNTHASE SMALL SUBUNIT	208	0.407824
PTHR22976	BIOTIN SYNTHASE	159	0.408115
PTHR47664	NLPC_P60 DOMAIN-CONTAINING PROTEIN	18	0.408398
PTHR45794	LEUCYL-TRNA SYNTHETASE	249	0.408453
PTHR37850	STRU PROTEIN	10	0.408689
PTHR43418	MULTIFUNCTIONAL TRYPTOPHAN BIOSYNTHESIS PROTEIN-RELATED	230	0.408706
PTHR30455	TRANSCRIPTIONAL REPRESSOR NRDR	46	0.408903
PTHR41373	DUF2156 DOMAIN-CONTAINING PROTEIN	8	0.408984
PTHR35811	SLR1870 PROTEIN	17	0.408996
PTHR45765	METHIONINE--TRNA LIGASE	270	0.409111
PTHR10317	EUKARYOTIC TRANSLATION INITIATION FACTOR 3 SUBUNIT E	220	0.409124
PTHR40267	BLR3294 PROTEIN	9	0.409131
PTHR43879	ABC TRANSPORTER PERMEASE PROTEIN	9	0.409136
PTHR37421	UPF0260 PROTEIN YCGN	11	0.409152
PTHR44742	FAMILY NOT NAMED	115	0.409233
PTHR43524	RADICAL SAM SUPERFAMILY PROTEIN	7	0.409276
PTHR11451	THREONINE-TRNA LIGASE	482	0.409366
PTHR48067	GPI-ANCHOR TRANSAMIDASE	207	0.4094
PTHR40083	UPF0122 PROTEIN CBO2450/CLC_2298	11	0.409456
PTHR42339	FAMILY NOT NAMED	7	0.409589
PTHR35344	GAS VESICLE STRUCTURAL PROTEIN 2-RELATED	3	0.409601
PTHR13697	PHOSPHOFRUCTOKINASE	225	0.40995
PTHR38596	UPF0114 PROTEIN YQHA	10	0.410362
PTHR42967	METAL DEPENDENT HYDROLASE	7	0.410463
PTHR11404	SUPEROXIDE DISMUTASE 2	261	0.4105
PTHR13049	DUF814-RELATED	220	0.410665
PTHR22942	RECA/RAD51/RADA DNA STRAND-PAIRING FAMILY MEMBER	426	0.410749
PTHR46683	OROTATE PHOSPHORIBOSYLTRANSFERASE 1-RELATED	38	0.410781
PTHR43660	DIPEPTIDYL CARBOXYPEPTIDASE	16	0.410822
PTHR11805	CYSTEINE-RICH PDZ-BINDING PROTEIN	157	0.410897
PTHR48332	DIOX_N DOMAIN-CONTAINING PROTEIN	18	0.410968
PTHR15351	ERLIN (ER LIPID RAFT ASSOCIATED PROTEIN) HOMOLOG	181	0.410979
PTHR43323	3-HYDROXY-3-METHYLGLUTARYL COENZYME A SYNTHASE	319	0.411132
PTHR38452	UPF0756 MEMBRANE PROTEIN YEAL	11	0.411151
PTHR42828	DHBP SYNTHASE RIBB-LIKE ALPHA/BETA DOMAIN-CONTAINING PROTEIN	99	0.411155
PTHR43523	GLUCOSE-1-PHOSPHATE ADENYLYLTRANSFERASE-RELATED	521	0.411275
PTHR42918	LYSYL-TRNA SYNTHETASE	434	0.411281
PTHR46081	PEPTIDE METHIONINE SULFOXIDE REDUCTASE 2	230	0.411355
PTHR42722	LEUCINE DEHYDROGENASE	16	0.411395
PTHR45197	SYNTHASE, PUTATIVE (AFU_ORTHOLOGUE AFUA_7G04190)-RELATED	24	0.411395
PTHR31611	HIGH-AFFINITY NICKEL TRANSPORT PROTEIN NIC1	29	0.411483
PTHR16254	POTASSIUM/PROTON ANTIPORTER-RELATED	264	0.411505
PTHR42752	IMIDAZOLONEPROPIONASE	90	0.411689
PTHR33788	OS07G0114300 PROTEIN	178	0.411864
PTHR10766	TRANSMEMBRANE 9 SUPERFAMILY PROTEIN	1403	0.411944
PTHR48356	DNA TOPOISOMERASE 6 SUBUNIT B	22	0.411971
PTHR45753	ORNITHINE CARBAMOYLTRANSFERASE, MITOCHONDRIAL	300	0.412009
PTHR47485	THYLAKOID LUMENAL 17.4 KDA PROTEIN, CHLOROPLASTIC	85	0.412135
PTHR10488	GLYCINE AMIDINOTRANSFERASE, MITOCHONDRIAL	50	0.41249
PTHR46311	CALCIUM-BINDING PROTEIN 8-RELATED	77	0.412888
PTHR15893	RIBOSOMAL PROTEIN L27	327	0.412949
PTHR36852	FAMILY NOT NAMED	1	0.412951
PTHR10683	TRANSALDOLASE	373	0.413052
PTHR21051	CAMP-RESPONSIVE ELEMENT-BINDING PROTEIN-LIKE 2	54	0.413149
PTHR11252	POLYRIBONUCLEOTIDE NUCLEOTIDYLTRANSFERASE	293	0.413245
PTHR10635	COATOMER SUBUNIT BETA	264	0.413606
PTHR43119	ABC TRANSPORT PROTEIN ATP-BINDING COMPONENT-RELATED	8	0.413675
PTHR43665	ISOPENTENYL-DIPHOSPHATE DELTA-ISOMERASE	28	0.413763
PTHR30037	DNA-3-METHYLADENINE GLYCOSYLASE 1	39	0.413839
PTHR48105	THIOREDOXIN REDUCTASE 1-RELATED-RELATED	746	0.414224
PTHR47363	GLUCOKINASE	16	0.414327
PTHR13407	RNF121 PROTEIN	90	0.414328
PTHR46313	FAMILY NOT NAMED	182	0.414776
PTHR46499	QUEUINE TRNA-RIBOSYLTRANSFERASE	61	0.414803
PTHR30296	UNCHARACTERIZED PROTEIN YKGE	13	0.415155
PTHR33407	PECTATE LYASE F-RELATED	38	0.415326
PTHR10602	EUKARYOTIC TRANSLATION INITIATION FACTOR 2 SUBUNIT 1	250	0.415355
PTHR22798	MCT-1 PROTEIN	221	0.415695
PTHR39324	CALCIUM DODECIN	10	0.415752
PTHR36566	NICKEL INSERTION PROTEIN-RELATED	19	0.415792
PTHR32338	N-ACETYL-GAMMA-GLUTAMYL-PHOSPHATE REDUCTASE, CHLOROPLASTIC-RELATED-RELATED	141	0.415803
PTHR48230	FAMILY NOT NAMED	19	0.41599
PTHR40629	PRO41 PROTEIN	9	0.416013
PTHR43820	HIGH-AFFINITY BRANCHED-CHAIN AMINO ACID TRANSPORT ATP-BINDING PROTEIN LIVF	92	0.416225
PTHR48151	SH3 DOMAIN-CONTAINING PROTEIN	79	0.416244
PTHR39192	IRON UPTAKE SYSTEM COMPONENT EFEO	11	0.416299
PTHR30218	POLYPHOSPHATE KINASE	38	0.416551
PTHR12399	EUKARYOTIC TRANSLATION INITIATION FACTOR 3 SUBUNIT 7	219	0.416565
PTHR39429	LIGHT-INDEPENDENT PROTOCHLOROPHYLLIDE REDUCTASE SUBUNIT N	7	0.416644
PTHR42961	IRON-SULFUR PROTEIN NUBPL	311	0.416662
PTHR32467	AP2-LIKE ETHYLENE-RESPONSIVE TRANSCRIPTION FACTOR	1658	0.416767
PTHR42199	UPF0212 PROTEIN MJ0068	5	0.416893
PTHR35565	CYTOPLASMIC PROTEIN-RELATED	17	0.416918
PTHR21327	GTP CYCLOHYDROLASE II-RELATED	377	0.416967
PTHR47737	GLYCINE BETAINE/PROLINE BETAINE TRANSPORT SYSTEM PERMEASE PROTEIN PROW	13	0.417213
PTHR39328	BLL2871 PROTEIN	5	0.417253
PTHR15397	SODIUM-GLUCOSE COTRANSPORTER REGULATORY PROTEIN -RELATED	24	0.417398
PTHR11735	TRNA N6-ADENOSINE THREONYLCARBAMOYLTRANSFERASE	497	0.417443
PTHR23100	ARGININE BIOSYNTHESIS BIFUNCTIONAL PROTEIN ARGJ	153	0.417711
PTHR40562	FAMILY NOT NAMED	5	0.417761
PTHR11817	PYRUVATE KINASE	1158	0.417821
PTHR42280	CITG FAMILY PROTEIN	5	0.418033
PTHR47814	PEPTIDYL-TRNA HYDROLASE ARFB	11	0.418317
PTHR30307	S-ADENOSYLMETHIONINE:TRNA RIBOSYLTRANSFERASE-ISOMERASE	41	0.418334
PTHR40517	METAL-DEPENDENT PHOSPHOHYDROLASE, HD SUPERFAMILY-RELATED	5	0.418511
PTHR36447	BETA-GALACTOSIDASE GANA	13	0.418547
PTHR12620	U2 SNRNP AUXILIARY FACTOR, SMALL SUBUNIT	519	0.41869
PTHR21339	RADICAL S-ADENOSYL METHIONINE DOMAIN-CONTAINING PROTEIN 2	51	0.418737
PTHR33398	30S RIBOSOMAL PROTEIN S20	130	0.418818
PTHR11132	SOLUTE CARRIER FAMILY 35	3664	0.419077
PTHR36503	BLR2520 PROTEIN	17	0.41947
PTHR21403	ATP PHOSPHORIBOSYLTRANSFERASE ATP-PRTASE	185	0.419495
PTHR19919	WD REPEAT CONTAINING PROTEIN	322	0.419526
PTHR47198	OS05G0299300 PROTEIN	59	0.419537
PTHR43100	GLUTAMATE SYNTHASE [NADPH] SMALL CHAIN	38	0.419615
PTHR39162	GLL3345 PROTEIN	7	0.419871
PTHR36150	DNA GYRASE INHIBITOR YACG	15	0.419922
PTHR22848	WD40 REPEAT PROTEIN	198	0.419958
PTHR24054	CASEIN KINASE II SUBUNIT ALPHA	467	0.419988
PTHR43655	ATP-DEPENDENT PROTEASE	444	0.420124
PTHR47960	DEAD-BOX ATP-DEPENDENT RNA HELICASE 50	462	0.420163
PTHR37318	BSL7504 PROTEIN	14	0.420286
PTHR46522	CYTIDINE MONOPHOSPHATE-N-ACETYLNEURAMINIC ACID HYDROXYLASE	40	0.420393
PTHR11164	GLUTAMATE CYSTEINE LIGASE	118	0.420416
PTHR22648	TRANSCRIPTION TERMINATION FACTOR NUSA	55	0.42045
PTHR43724	PYRUVATE SYNTHASE SUBUNIT PORD	20	0.420468
PTHR11432	NADH DEHYDROGENASE SUBUNIT 1	234	0.420535
PTHR47170	MALONYL-COA ACP TRANSACYLASE, ACP-BINDING	102	0.420615
PTHR12608	TRANSMEMBRANE PROTEIN HTP-1 RELATED	507	0.420698
PTHR43651	1,4-ALPHA-GLUCAN-BRANCHING ENZYME	439	0.420915
PTHR22960	MOLYBDOPTERIN COFACTOR SYNTHESIS PROTEIN A	339	0.421045
PTHR11063	GLUTAMATE SEMIALDEHYDE DEHYDROGENASE	301	0.421356
PTHR36179	LUD_DOM DOMAIN-CONTAINING PROTEIN	14	0.421474
PTHR42990	ATPASE	6	0.421501
PTHR48030	SPLICING FACTOR 3B SUBUNIT 4	185	0.421513
PTHR14781	UNCHARACTERIZED	93	0.42154
PTHR10093	IRON-SULFUR CLUSTER ASSEMBLY ENZYME NIFU HOMOLOG	313	0.421699
PTHR42744	BINDING-PROTEIN-DEPENDENT TRANSPORT SYSTEMS INNER MEMBRANE COMPONENT	11	0.421724
PTHR42764	PHOSPHONATES UTILIZATION ATP-BINDING PROTEIN PHNK-RELATED	17	0.422031
PTHR23249	TRAFFICKING PROTEIN PARTICLE COMPLEX SUBUNIT	419	0.422176
PTHR43041	HYDROLASE, METALLO-BETA-LACTAMASE SUPERFAMILY	8	0.422181
PTHR40682	F5/8 TYPE C DOMAIN CONTAINING PROTEIN	9	0.422202
PTHR21058	6,7-DIMETHYL-8-RIBITYLLUMAZINE SYNTHASE DMRL SYNTHASE LUMAZINE SYNTHASE	193	0.42228
PTHR23076	METALLOPROTEASE M41 FTSH	1156	0.422383
PTHR10803	ARSENICAL PUMP-DRIVING ATPASE ARSENITE-TRANSLOCATING ATPASE	410	0.422399
PTHR12937	VACUOLAR PROTEIN SORTING 28, ISOFORM 2 VPS28	214	0.422714
PTHR30134	HYDROGENASE PROTEIN ASSEMBLY PROTEIN, NICKEL CHAPERONE	21	0.422731
PTHR43007	2-PHOSPHO-L-LACTATE TRANSFERASE	8	0.42275
PTHR24115	KINESIN-RELATED	3559	0.422813
PTHR41983	SHORT-CHAIN FATTY ACID TRANSPORTER-RELATED	8	0.422921
PTHR39163	FERREDOXIN	18	0.422997
PTHR43979	PRE-MRNA-PROCESSING FACTOR 17	210	0.423013
PTHR43408	FMN REDUCTASE (NADPH)	14	0.42332
PTHR10055	TRYPTOPHANYL-TRNA SYNTHETASE	266	0.423443
PTHR35517	PROTEIN ARGININE N-METHYLTRANSFERASE SFM1	27	0.423545
PTHR23406	MALIC ENZYME-RELATED	704	0.423579
PTHR48015	SERINE/THREONINE-PROTEIN KINASE TAO	799	0.423652
PTHR43036	OSJNBB0011N17.9 PROTEIN	167	0.423856
PTHR43137	DIHYDROOROTASE	135	0.424003
PTHR43403	NAD-SPECIFIC GLUTAMATE DEHYDROGENASE	11	0.424059
PTHR48289	DDE TNP4 DOMAIN-CONTAINING PROTEIN	5	0.424079
PTHR46594	P-TYPE CATION-TRANSPORTING ATPASE	121	0.424276
PTHR43204	ABC TRANSPORTER I FAMILY MEMBER 6, CHLOROPLASTIC	138	0.424296
PTHR44207	SURFACE ANTIGEN BSPA-LIKE-RELATED	12	0.424301
PTHR30042	POTASSIUM-TRANSPORTING ATPASE C CHAIN	25	0.424395
PTHR42994	PEPTIDASE T	37	0.424403
PTHR43166	AMINO ACID IMPORT ATP-BINDING PROTEIN	177	0.424472
PTHR37480	ENOYL-[ACYL-CARRIER-PROTEIN] REDUCTASE [NADH]	7	0.424535
PTHR11601	CYSTEINE DESULFURYLASE FAMILY MEMBER	354	0.424606
PTHR23408	METHYLMALONYL-COA MUTASE	82	0.424695
PTHR34696	PHOSPHORIBOSYLFORMYLGLYCINAMIDINE SYNTHASE SUBUNIT PURS	29	0.424726
PTHR37692	HYPOTHETICAL MEMBRANE SPANNING PROTEIN	12	0.424855
PTHR36112	RIBOSOMAL RNA SMALL SUBUNIT METHYLTRANSFERASE J	18	0.424917
PTHR10593	SERINE/THREONINE-PROTEIN KINASE RIO	1142	0.425226
PTHR11141	PROTEIN TRANSPORT PROTEIN SEC23	552	0.425282
PTHR43208	ABC TRANSPORTER SUBSTRATE-BINDING PROTEIN	6	0.425376
PTHR47368	NUMB	76	0.425696
PTHR47836	PROTEIN CBG09520-RELATED	11	0.425753
PTHR42897	PYRUVATE SYNTHASE SUBUNIT PORB	24	0.42576
PTHR42804	ALDEHYDE DEHYDROGENASE	13	0.425949
PTHR32294	DNA POLYMERASE III SUBUNIT ALPHA	74	0.42602
PTHR12458	ORF PROTEIN	261	0.426125
PTHR43079	PROBABLE CADMIUM/ZINC-TRANSPORTING ATPASE HMA1	101	0.42631
PTHR18866	CARBOXYLASE:PYRUVATE/ACETYL-COA/PROPIONYL-COA CARBOXYLASE	291	0.426444
PTHR48185	BNACNNG12700D PROTEIN	30	0.426501
PTHR45699	60S ACIDIC RIBOSOMAL PROTEIN P0	337	0.426527
PTHR11098	NICOTINATE PHOSPHORIBOSYLTRANSFERASE	269	0.426557
PTHR33217	TRANSPOSASE FOR INSERTION SEQUENCE ELEMENT IS1081	41	0.426587
PTHR46531	ZINC TRANSPORTER 6	51	0.42666
PTHR39961	HYPOTHETICAL CYTOSOLIC PROTEIN	6	0.426764
PTHR42977	HYDROLASE-RELATED	21	0.42685
PTHR11403	CYTOCHROME C OXIDASE SUBUNIT III	180	0.426885
PTHR10114	60S RIBOSOMAL PROTEIN L36	326	0.426929
PTHR10245	ENDOTHELIAL DIFFERENTIATION-RELATED FACTOR 1 MULTIPROTEIN BRIDGING FACTOR 1	323	0.426942
PTHR43374	FLAVIN PRENYLTRANSFERASE	45	0.42699
PTHR33280	50S RIBOSOMAL PROTEIN L31, CHLOROPLASTIC	146	0.427044
PTHR43174	UDP-N-ACETYLGLUCOSAMINE 2-EPIMERASE	54	0.427077
PTHR38811	FAMILY NOT NAMED	11	0.427241
PTHR11808	TRANS-SULFURATION ENZYME FAMILY MEMBER	475	0.427309
PTHR12681	ZINC FINGER-CONTAINING PROTEIN P48ZNF	224	0.427401
PTHR43330	METHIONINE AMINOPEPTIDASE	562	0.427545
PTHR30510	UNCHARACTERIZED	15	0.427562
PTHR36107	SMALL, ACID-SOLUBLE SPORE PROTEIN A	14	0.42764
PTHR13509	SEC61 SUBUNIT BETA	322	0.427727
PTHR12131	ATP-DEPENDENT RNA AND DNA HELICASE	1002	0.427729
PTHR30029	UNCHARACTERIZED	15	0.427811
PTHR12220	50S/60S RIBOSOMAL PROTEIN L16	282	0.427901
PTHR39174	INNER MEMBRANE PROTEIN-RELATED	8	0.428093
PTHR41517	1,2-DIOXYGENASE PROTEIN-RELATED	9	0.428439
PTHR37839	NA(+)-TRANSLOCATING NADH-QUINONE REDUCTASE SUBUNIT A	13	0.428457
PTHR42934	GLYCOLATE OXIDASE SUBUNIT GLCD	43	0.428556
PTHR33803	IS1478 TRANSPOSASE	11	0.428625
PTHR39338	BLL5662 PROTEIN-RELATED	13	0.428702
PTHR45136	ABC TRANSPORTER DOMAIN-CONTAINING PROTEIN	10	0.428752
PTHR37486	STRINGENT STARVATION PROTEIN B	12	0.428924
PTHR10801	24-DEHYDROCHOLESTEROL REDUCTASE	208	0.428928
PTHR38567	DUF4291 DOMAIN-CONTAINING PROTEIN	11	0.428958
PTHR43452	PYRUVATE DECARBOXYLASE	354	0.428984
PTHR45852	SER/THR-PROTEIN KINASE RIO2	217	0.429002
PTHR43727	DIAMINOPIMELATE DECARBOXYLASE	165	0.429498
PTHR43709	ACONITATE ISOMERASE-RELATED	23	0.429552
PTHR42713	HISTIDINE KINASE-RELATED	5	0.429652
PTHR43379	CYSTATHIONINE GAMMA-SYNTHASE	141	0.429678
PTHR19268	G PROTEIN-COUPLED RECEPTOR	102	0.42991
PTHR47978	FAMILY NOT NAMED	1027	0.430021
PTHR31186	MODULATOR OF SMOOTHENED PROTEIN	64	0.430051
PTHR21110	PHOSPHOPENTOMUTASE	23	0.430235
PTHR12962	CALCIUM-REGULATED HEAT STABLE PROTEIN CRHSP-24-RELATED	101	0.430455
PTHR11558	SPERMIDINE/SPERMINE SYNTHASE	422	0.430458
PTHR35868	DUF2804 DOMAIN-CONTAINING PROTEIN-RELATED	20	0.430649
PTHR39550	SLL0658 PROTEIN	9	0.430671
PTHR28213	IMP-SPECIFIC 5'-NUCLEOTIDASE 1	46	0.430756
PTHR42706	FORMYLTETRAHYDROFOLATE DEFORMYLASE	150	0.430833
PTHR43750	UDP-GLUCOSE 6-DEHYDROGENASE TUAD	60	0.430858
PTHR22773	NADH DEHYDROGENASE	268	0.430866
PTHR36974	MEMBRANE PROTEIN-RELATED	13	0.430989
PTHR45780	ETHANOLAMINE-PHOSPHATE CYTIDYLYLTRANSFERASE	312	0.431145
PTHR43393	CYTOKININ RIBOSIDE 5'-MONOPHOSPHATE PHOSPHORIBOHYDROLASE	37	0.431316
PTHR40031	HYPOTHETICAL MEMBRANE SPANNING PROTEIN	12	0.431342
PTHR23090	NH 3 /GLUTAMINE-DEPENDENT NAD + SYNTHETASE	270	0.431431
PTHR30536	ALTRONATE/GALACTARATE DEHYDRATASE	15	0.431457
PTHR32315	ADENINE PHOSPHORIBOSYLTRANSFERASE	165	0.43146
PTHR28384	PROGRESSIVE ANKYLOSIS PROTEIN HOMOLOG	42	0.431569
PTHR10937	GLUCOSAMINE--FRUCTOSE-6-PHOSPHATE AMINOTRANSFERASE, ISOMERIZING	346	0.43161
PTHR11800	DNA-DIRECTED RNA POLYMERASE	461	0.431895
PTHR43694	RIBONUCLEASE J	136	0.432001
PTHR43469	DISULFIDE FORMATION PROTEIN-RELATED	9	0.432033
PTHR43294	SODIUM/POTASSIUM-TRANSPORTING ATPASE SUBUNIT ALPHA	316	0.432048
PTHR43749	RNA-SPLICING LIGASE RTCB	17	0.432056
PTHR12682	ARCHEASE	99	0.432081
PTHR11843	40S RIBOSOMAL PROTEIN S12	328	0.432195
PTHR37774	ATP SYNTHASE PROTEIN MI25-RELATED	58	0.432219
PTHR43026	2-HYDROXYACID DEHYDROGENASE HOMOLOG 1-RELATED	49	0.432307
PTHR30108	3-OCTAPRENYL-4-HYDROXYBENZOATE CARBOXY-LYASE-RELATED	49	0.432353
PTHR33797	ORGANIC HYDROPEROXIDE RESISTANCE PROTEIN-LIKE	32	0.432444
PTHR41386	INTEGRAL MEMBRANE PROTEIN-RELATED	8	0.432474
PTHR24070	RAS, DI-RAS, AND RHEB FAMILY MEMBERS OF SMALL GTPASE SUPERFAMILY	1417	0.432676
PTHR14165	MAJOR VAULT PROTEIN	81	0.432765
PTHR14208	BASIC LEUCINE ZIPPER AND W2 DOMAIN-CONTAINING PROTEIN	211	0.432797
PTHR42958	HYDROGENASE-2 LARGE CHAIN	29	0.432835
PTHR37460	ENDONUCLEASE III	13	0.433056
PTHR39191	GALACTOSE-1-PHOSPHATE URIDYLYLTRANSFERASE	10	0.433086
PTHR47275	NAD(P)H-QUINONE OXIDOREDUCTASE SUBUNIT I, CHLOROPLASTIC	82	0.433171
PTHR45688	ALANINE--GLYOXYLATE AMINOTRANSFERASE 2, MITOCHONDRIAL	390	0.433268
PTHR30547	UNCHARACTERIZED PROTEIN YHCG-RELATED	12	0.433331
PTHR34556	FAMILY NOT NAMED	87	0.433572
PTHR31369	PROTEIN CBG02325-RELATED	14	0.433754
PTHR10916	60S RIBOSOMAL PROTEIN L35/50S RIBOSOMAL PROTEIN L29	151	0.433769
PTHR37815	UPF0397 PROTEIN BC_2624-RELATED	4	0.433778
PTHR43069	FUMARYLACETOACETASE	197	0.434023
PTHR10566	CHAPERONE-ACTIVITY OF BC1 COMPLEX CABC1 -RELATED	744	0.434038
PTHR35372	ATP BINDING PROTEIN-RELATED	18	0.434093
PTHR47567	MITOCHONDRIAL SUBSTRATE/SOLUTE CARRIER	18	0.43438
PTHR43381	TRANSLATION INITIATION FACTOR IF-2-RELATED	614	0.434581
PTHR30068	URONATE ISOMERASE	13	0.434669
PTHR43261	TRANSLATION ELONGATION FACTOR G-RELATED	268	0.434972
PTHR12951	RETINAL PROTEIN 4	119	0.435025
PTHR11073	CALRETICULIN AND CALNEXIN	665	0.435091
PTHR23382	MALATE DEHYDROGENASE	484	0.435093
PTHR37805	CYTOPLASMIC PROTEIN-RELATED	9	0.435169
PTHR10138	TRYPTOPHAN 2,3-DIOXYGENASE	82	0.435265
PTHR23289	CYTOCHROME C OXIDASE ASSEMBLY PROTEIN COX15	201	0.435277
PTHR47036	COBALT-FACTOR III C(17)-METHYLTRANSFERASE-RELATED	28	0.435478
PTHR43029	AMMONIUM TRANSPORTER MEP2	515	0.435565
PTHR43366	PYRUVATE SYNTHASE SUBUNIT PORC	19	0.435709
PTHR38149	ATPASE	14	0.435785
PTHR42655	GLYCOGEN PHOSPHORYLASE	20	0.435791
PTHR40696	DUF371 FAMILY PROTEIN	9	0.436015
PTHR43588	COBALT-PRECORRIN-8 METHYLMUTASE	28	0.436161
PTHR43578	NADH-QUINONE OXIDOREDUCTASE SUBUNIT F	31	0.436202
PTHR43076	FO SYNTHASE (COFH)	55	0.436212
PTHR43247	PHOSPHOSERINE AMINOTRANSFERASE	232	0.436443
PTHR33627	TRANSPOSASE	9	0.436685
PTHR13703	SMAD	418	0.436726
PTHR43293	ACETATE COA-TRANSFERASE YDIF	33	0.436779
PTHR32179	NICOTINATE-NUCLEOTIDE PYROPHOSPHORYLASE [CARBOXYLATING]	226	0.436914
PTHR43556	PEPTIDE CHAIN RELEASE FACTOR RF3	38	0.436945
PTHR13779	WERNER HELICASE-INTERACTING PROTEIN 1 FAMILY MEMBER	192	0.437094
PTHR43644	NA(+)-TRANSLOCATING NADH-QUINONE REDUCTASE SUBUNIT	21	0.437133
PTHR32119	OROTIDINE 5'-PHOSPHATE DECARBOXYLASE	74	0.437398
PTHR47984	OS01G0323000 PROTEIN	681	0.437566
PTHR11246	PRE-MRNA SPLICING FACTOR	682	0.437612
PTHR36574	RHAMNOGALACTURONATE LYASE-RELATED	14	0.437808
PTHR42866	3-DEOXY-MANNO-OCTULOSONATE CYTIDYLYLTRANSFERASE	140	0.43785
PTHR36450	THIOREDOXIN	7	0.43831
PTHR11453	ANION EXCHANGE PROTEIN	902	0.438322
PTHR36331	40S RIBOSOMAL PROTEIN	85	0.43835
PTHR21256	HISTIDINOL DEHYDROGENASE HDH	182	0.438389
PTHR47179	E3 UBIQUITIN-PROTEIN LIGASE SIS3	102	0.438452
PTHR10520	TRIFUNCTIONAL PURINE BIOSYNTHETIC PROTEIN ADENOSINE-3-RELATED	271	0.438493
PTHR11938	FAD NADPH DEHYDROGENASE/OXIDOREDUCTASE	514	0.438557
PTHR11473	AROMATIC AMINO ACID HYDROXYLASE	266	0.43859
PTHR13794	ENOLASE SUPERFAMILY, MANDELATE RACEMASE	88	0.438606
PTHR12416	UNCHARACTERIZED	433	0.438743
PTHR10670	DNA POLYMERASE EPSILON CATALYTIC SUBUNIT A	197	0.438815
PTHR10064	60S RIBOSOMAL PROTEIN L22	410	0.439259
PTHR13016	AMMECR1 HOMOLOG	262	0.43926
PTHR13693	CLASS II AMINOTRANSFERASE/8-AMINO-7-OXONONANOATE SYNTHASE	926	0.439319
PTHR12934	50S RIBOSOMAL PROTEIN L15	341	0.43955
PTHR36498	TATA-BINDING PROTEIN-ASSOCIATED FACTOR 172	157	0.439655
PTHR12847	ATP-BINDING CASSETTE ABC TRANSPORTER-RELATED	512	0.439733
PTHR37377	RIBULOSE BISPHOSPHATE CARBOXYLASE LARGE CHAIN	55	0.439761
PTHR40631	ALPHA-L-ARABINOFURANOSIDASE AXHA-2-RELATED	8	0.439819
PTHR47017	ACYL-COA	88	0.439953
PTHR11561	PHOSPHOENOLPYRUVATE CARBOXYKINASE	142	0.439958
PTHR44177	TETRATRICOPEPTIDE REPEAT PROTEIN 8	76	0.439978
PTHR45618	MITOCHONDRIAL DICARBOXYLATE CARRIER-RELATED	1161	0.440088
PTHR12422	UNCHARACTERIZED	134	0.440425
PTHR21294	ELECTRON TRANSFER FLAVOPROTEIN BETA-SUBUNIT	247	0.440441
PTHR10540	EUKARYOTIC TRANSLATION INITIATION FACTOR 3 SUBUNIT F-RELATED	657	0.440503
PTHR11124	VACUOLAR SORTING PROTEIN VPS29	284	0.440688
PTHR11067	INOSINE TRIPHOSPHATE PYROPHOSPHATASE/HAM1 PROTEIN	274	0.440761
PTHR37940	LYSINE--TRNA LIGASE	8	0.440841
PTHR45839	FAMILY NOT NAMED	416	0.44116
PTHR43212	QUERCETIN 2,3-DIOXYGENASE	44	0.441313
PTHR21432	ACETYL-COA HYDROLASE-RELATED	37	0.441429
PTHR42959	CARBAMOYLTRANSFERASE	24	0.441571
PTHR31223	LOG FAMILY PROTEIN YJL055W	751	0.441651
PTHR30414	UNCHARACTERIZED	10	0.442039
PTHR12706	STRAWBERRY NOTCH-RELATED	217	0.44211
PTHR38450	STAGE V SPORULATION PROTEIN AC-RELATED	10	0.442469
PTHR12718	CELL CYCLE CONTROL PROTEIN CWF15	221	0.442544
PTHR31619	4-HYDROXY-3-METHYLBUT-2-ENYL DIPHOSPHATE REDUCTASE, CHLOROPLASTIC	106	0.442728
PTHR35514	THYLAKOID LUMENAL 15.0 KDA PROTEIN 2, CHLOROPLASTIC	84	0.442773
PTHR46971	CALCINEURIN B SUBUNIT (PROTEIN PHOSPHATASE 2B REGULATORY SUBUNIT)-LIKE PROTEIN	144	0.442828
PTHR47314	MALTOSE/MALTODEXTRIN TRANSPORT SYSTEM PERMEASE PROTEIN MALF	18	0.442857
PTHR43872	MONOOXYGENASE, PUTATIVE (AFU_ORTHOLOGUE AFUA_8G02570)-RELATED	23	0.442928
PTHR43793	FAD SYNTHASE	37	0.442986
PTHR33408	TRANSPOSASE	12	0.443018
PTHR20902	41-2 PROTEIN ANTIGEN-RELATED	211	0.443179
PTHR42823	ATP SYNTHASE SUBUNIT A, CHLOROPLASTIC	114	0.443678
PTHR15497	3-HYDROXYANTHRANILATE 3,4-DIOXYGENASE	86	0.443884
PTHR43175	CARBONIC ANHYDRASE	29	0.444011
PTHR35804	LYSINE EXPORTER LYSO	20	0.444021
PTHR46036	LACTOYLGLUTATHIONE LYASE	272	0.444179
PTHR39340	SULFOFRUCTOSEPHOSPHATE ALDOLASE	12	0.444432
PTHR42922	PHOSPHATE TRANSPORT SYSTEM PERMEASE PROTEIN PSTA	28	0.44444
PTHR23089	HISTIDINE TRIAD HIT PROTEIN	371	0.4446
PTHR42806	GLYCINE CLEAVAGE SYSTEM P-PROTEIN	28	0.444651
PTHR42832	AMINO ACID AMINOTRANSFERASE	47	0.444677
PTHR16505	PROTEIN LZIC	62	0.444691
PTHR46175	BACTERIOOPSIN TRANSCRIPTIONAL ACTIVATOR	256	0.444939
PTHR40033	NA(+)-MALATE SYMPORTER	8	0.445033
PTHR30448	UNCHARACTERIZED	30	0.445049
PTHR30546	FLAVODOXIN-RELATED PROTEIN WRBA-RELATED	525	0.445176
PTHR43197	UTP--GLUCOSE-1-PHOSPHATE URIDYLYLTRANSFERASE	50	0.445185
PTHR12722	XAP-5 PROTEIN-RELATED	197	0.445201
PTHR47573	PROTEIN AF-9 HOMOLOG	36	0.445349
PTHR45790	SIROHEME SYNTHASE-RELATED	217	0.445402
PTHR13773	PHOSPHATIDATE CYTIDYLYLTRANSFERASE	308	0.44569
PTHR42813	ZINC-TYPE ALCOHOL DEHYDROGENASE-LIKE	107	0.445758
PTHR37398	ENDO-BETA-1,4-MANNANASE	9	0.445803
PTHR32154	PYRUVATE-FLAVODOXIN OXIDOREDUCTASE-RELATED	92	0.445853
PTHR36305	PHOSPHATIDYLGLYCEROPHOSPHATASE A	17	0.445869
PTHR15285	NEURONATIN	19	0.445977
PTHR46039	SUCROSE-PHOSPHATE SYNTHASE 3-RELATED	315	0.44602
PTHR42915	HYPOTHETICAL 460 KDA PROTEIN IN FEUA-SIGW INTERGENIC REGION [PRECURSOR]	14	0.446166
PTHR28627	CYTOCHROME C OXIDASE ASSEMBLY FACTOR 5	154	0.446188
PTHR30576	COLANIC BIOSYNTHESIS UDP-GLUCOSE LIPID CARRIER TRANSFERASE	81	0.446464
PTHR36319	PROTEIN GIGANTEA	98	0.446585
PTHR10606	6-PHOSPHOFRUCTO-2-KINASE/FRUCTOSE-2,6-BISPHOSPHATASE	444	0.446624
PTHR33607	ENDONUCLEASE-1	56	0.446678
PTHR10516	PEPTIDYL-PROLYL CIS-TRANS ISOMERASE	869	0.446792
PTHR42733	DJ-1 PROTEIN	185	0.44685
PTHR43505	REVERSE GYRASE	14	0.446937
PTHR12944	SOLUBLE LIVER ANTIGEN/LIVER PANCREAS ANTIGEN	81	0.446952
PTHR37976	PROTEIN CBG16927	11	0.446956
PTHR46126	DYNACTIN SUBUNIT 5	101	0.447091
PTHR19836	30S RIBOSOMAL PROTEIN S14	277	0.447186
PTHR43740	LEUCYL-TRNA SYNTHETASE	222	0.447676
PTHR47511	PEPTIDYL-PROLYL CIS-TRANS ISOMERASE CYP23	86	0.447875
PTHR30330	AGSS FAMILY TRANSPORTER, SODIUM-ALANINE	61	0.44788
PTHR22594	ASPARTYL/LYSYL-TRNA SYNTHETASE	759	0.447932
PTHR43776	TRANSPORT ATP-BINDING PROTEIN	155	0.448069
PTHR30070	HEME EXPORTER PROTEIN B	58	0.448239
PTHR43781	SACCHAROPINE DEHYDROGENASE	8	0.448293
PTHR21236	GOLGI MEMBRANE PROTEIN YIP1	552	0.448662
PTHR11557	PORPHOBILINOGEN DEAMINASE	249	0.44871
PTHR33941	PROPANEDIOL UTILIZATION PROTEIN PDUA	35	0.448755
PTHR46523	DCTP PYROPHOSPHATASE 1	61	0.448893
PTHR11946	VALYL-TRNA SYNTHETASES	419	0.448905
PTHR36541	SUPEROXIDE REDUCTASE-RELATED	16	0.448936
PTHR37308	INTEGRAL MEMBRANE PROTEIN	13	0.44908
PTHR40524	PEPTIDASE_C39_2 DOMAIN-CONTAINING PROTEIN	10	0.449116
PTHR11879	ASPARTATE AMINOTRANSFERASE	686	0.44914
PTHR10585	ER LUMEN PROTEIN RETAINING RECEPTOR	699	0.449239
PTHR33711	DIOXYGENASE, PUTATIVE (AFU_ORTHOLOGUE AFUA_2G02910)-RELATED	60	0.449261
PTHR12841	PROTEIN UNC-50 HOMOLOG	190	0.449403
PTHR11668	SERINE/THREONINE PROTEIN PHOSPHATASE	1181	0.449447
PTHR30376	SIGMA FACTOR RPOH HEAT SHOCK RELATED	24	0.44957
PTHR21242	TRANSCRIPTION INITIATION FACTOR TFIID SUBUNIT 10	196	0.449692
PTHR11776	ADENINE PHOSPHORIBOSYLTRANSFERASE	347	0.449791
PTHR32044	GLUCOMANNAN 4-BETA-MANNOSYLTRANSFERASE 9	848	0.449822
PTHR13250	TF-1 CELL APOPTOSIS RELATED PROTEIN-15	69	0.449936
PTHR43206	AMINOTRANSFERASE	140	0.450084
PTHR34737	TEMPTIN	32	0.450107
PTHR36781	OS05G0114600 PROTEIN	78	0.450184
PTHR31675	PROTEIN YABBY 6-RELATED	540	0.45024
PTHR37831	D-RIBOSE PYRANASE	14	0.450292
PTHR43491	UDP-N-ACETYL-D-MANNOSAMINE DEHYDROGENASE	40	0.450335
PTHR21381	ZGC:162297	54	0.450347
PTHR33477	P-LOOP NTPASE DOMAIN-CONTAINING PROTEIN LPA1 HOMOLOG 1	285	0.450364
PTHR43296	PEROXISOMAL 2,4-DIENOYL-COA REDUCTASE	205	0.450408
PTHR36204	N-ACETYLMANNOSAMINE-6-PHOSPHATE 2-EPIMERASE-RELATED	16	0.450409
PTHR36454	LMO2823 PROTEIN	16	0.450414
PTHR40257	FAMILY NOT NAMED	8	0.450518
PTHR44119	MAGNESIUM-CHELATASE SUBUNIT CHLH, CHLOROPLASTIC	113	0.45061
PTHR11544	COLD SHOCK DOMAIN CONTAINING PROTEINS	296	0.450632
PTHR10515	THYMIDINE PHOSPHORYLASE	72	0.4507
PTHR19923	WD40 REPEAT PROTEINPRL1/PRL2-RELATED	214	0.450825
PTHR42862	DELTA-1-PYRROLINE-5-CARBOXYLATE DEHYDROGENASE 1, ISOFORM A-RELATED	97	0.450991
PTHR46639	DIENCEPHALON/MESENCEPHALON HOMEOBOX PROTEIN 1	46	0.45102
PTHR36052	EXCITATORY AMINO ACID TRANSPORTER	85	0.451221
PTHR45696	60S ACIDIC RIBOSOMAL PROTEIN P1	385	0.451484
PTHR43123	POLYSACCHARIDE DEACETYLASE-RELATED	22	0.451613
PTHR11689	CHLORIDE CHANNEL PROTEIN CLC FAMILY MEMBER	607	0.451639
PTHR39652	UPF0201 PROTEIN TK1335	10	0.45171
PTHR38598	INNER MEMBRANE PROTEIN YJCH	10	0.451842
PTHR13232	NAD(P)H-HYDRATE EPIMERASE	201	0.451974
PTHR31224	UNC119-BINDING PROTEIN C5ORF30	34	0.452011
PTHR43863	HYDROLASE, PUTATIVE (AFU_ORTHOLOGUE AFUA_1G03140)-RELATED	11	0.452168
PTHR40606	FAMILY NOT NAMED	5	0.452276
PTHR30100	FATTY ACID/PHOSPHOLIPID SYNTHESIS PROTEIN PLSX	37	0.452297
PTHR41286	HNH NUCLEASE YAJD-RELATED	9	0.452438
PTHR10072	IRON-SULFUR CLUSTER ASSEMBLY PROTEIN	259	0.452454
PTHR42679	S-METHYL-5'-THIOADENOSINE PHOSPHORYLASE	132	0.452476
PTHR10966	TRANSCRIPTION INITIATION FACTOR IIA SUBUNIT 2	234	0.452512
PTHR10060	TATD FAMILY DEOXYRIBONUCLEASE	238	0.452597
PTHR42701	IMIDAZOLE GLYCEROL PHOSPHATE SYNTHASE SUBUNIT HISH	66	0.452803
PTHR36577	DUF521 DOMAIN PROTEIN (AFU_ORTHOLOGUE AFUA_6G00490)	10	0.452854
PTHR10953	UBIQUITIN-ACTIVATING ENZYME E1	1935	0.452881
PTHR44395	FAMILY NOT NAMED	53	0.452903
PTHR42905	PHOSPHOENOLPYRUVATE CARBOXYLASE	211	0.452953
PTHR45629	SNF2/RAD54 FAMILY MEMBER	792	0.453083
PTHR12789	DENSITY-REGULATED PROTEIN HOMOLOG	246	0.453145
PTHR11380	TRANSCRIPTION INITIATION FACTOR TFIID/SUPT3-RELATED	274	0.453257
PTHR30438	UNCHARACTERIZED	17	0.453433
PTHR10969	MICROTUBULE-ASSOCIATED PROTEINS 1A/1B LIGHT CHAIN 3-RELATED	859	0.453463
PTHR35092	CHLORINASE MJ1651	21	0.453564
PTHR14503	MITOCHONDRIAL RIBOSOMAL PROTEIN 34 FAMILY MEMBER	278	0.453681
PTHR45644	AAA ATPASE, PUTATIVE (AFU_ORTHOLOGUE AFUA_2G12920)-RELATED-RELATED	810	0.453847
PTHR11280	GLUCOSAMINE-6-PHOSPHATE ISOMERASE	165	0.453909
PTHR11390	PROKARYOTIC DNA TOPOISOMERASE	379	0.45398
PTHR43055	FORMATE-DEPENDENT PHOSPHORIBOSYLGLYCINAMIDE FORMYLTRANSFERASE	17	0.453984
PTHR21207	PARKIN COREGULATED GENE PROTEIN PARK2 COREGULATED	158	0.454002
PTHR30426	4-HYDROXY-3-METHYLBUT-2-ENYL DIPHOSPHATE REDUCTASE	41	0.454015
PTHR45980	FAMILY NOT NAMED	360	0.454095
PTHR13021	PRE-MRNA-SPLICING FACTOR ISY1	206	0.454142
PTHR43450	ASPARTYL-TRNA SYNTHETASE	281	0.454182
PTHR11127	60S RIBOSOMAL PROTEIN L14	311	0.454254
PTHR46638	CORRINOID ADENOSYLTRANSFERASE	39	0.454438
PTHR33979	OS02G0221600 PROTEIN	138	0.454467
PTHR23321	RIBOSOMAL PROTEIN S15, BACTERIAL AND ORGANELLAR	159	0.454489
PTHR13617	PROTEIN ABHD18	150	0.454548
PTHR12373	ENHANCER OF RUDIMENTARY ERH	191	0.454598
PTHR32074	RNA DEMETHYLASE ALKBH5	46	0.454671
PTHR32145	DIFLAVIN FLAVOPROTEIN A 2-RELATED	44	0.455091
PTHR48109	DIHYDROOROTATE DEHYDROGENASE (QUINONE), MITOCHONDRIAL-RELATED	287	0.455186
PTHR37425	FAMILY NOT NAMED	9	0.45526
PTHR11085	NAD-DEPENDENT PROTEIN DEACYLASE SIRTUIN-5, MITOCHONDRIAL-RELATED	870	0.45538
PTHR39648	6-HYDROXYMETHYL-7,8-DIHYDROPTERIN PYROPHOSPHOKINASE	10	0.455501
PTHR32329	BIFUNCTIONAL PROTEIN [INCLUDES 2-HYDROXYACYL-COA DEHYDRATASE (N-TER) AND ITS ACTIVATOR DOMAIN (C_TERM)-RELATED	36	0.455533
PTHR10285	URIDINE KINASE	1431	0.455562
PTHR12865	PHOSPHATIDYLINOSITOL 4-KINASE TYPE-II	135	0.455626
PTHR11043	ZETA-COAT PROTEIN	443	0.455633
PTHR11985	GLYCEROL-3-PHOSPHATE DEHYDROGENASE	264	0.455668
PTHR45723	SERINE/THREONINE-PROTEIN KINASE RIO1	283	0.455698
PTHR43705	HYDROXYACYLGLUTATHIONE HYDROLASE	28	0.455718
PTHR33383	MEMBRANE PROTEIN INSERTION EFFICIENCY FACTOR-RELATED	134	0.456434
PTHR15858	UNCHARACTERIZED	213	0.456524
PTHR39335	BLL4220 PROTEIN	6	0.456568
PTHR43513	DIHYDROOROTATE DEHYDROGENASE B (NAD(+)), ELECTRON TRANSFER SUBUNIT	30	0.456625
PTHR24343	SERINE/THREONINE KINASE	3053	0.456786
PTHR34478	PROTEIN LEMA	27	0.456805
PTHR32005	TRANSMEMBRANE PROTEIN 178B-RELATED	77	0.456826
PTHR47856	HEAVY METAL-ASSOCIATED ISOPRENYLATED PLANT PROTEIN 20-LIKE	49	0.456831
PTHR31290	UV-DAMAGE ENDONUCLEASE	24	0.456892
PTHR23281	MERLIN/MOESIN/EZRIN/RADIXIN	230	0.456921
PTHR20881	3-METHYL-2-OXOBUTANOATE HYDROXYMETHYLTRANSFERASE	199	0.456938
PTHR32379	GUANIDINOACETATE N-METHYLTRANSFERASE	167	0.456993
PTHR43061	GTP DIPHOSPHOKINASE RSH1, CHLOROPLASTIC-RELATED	96	0.457098
PTHR20917	PNAS-RELATED	165	0.457292
PTHR47878	OXIDOREDUCTASE FAD/NAD(P)-BINDING DOMAIN PROTEIN	20	0.457524
PTHR21610	VON WILLEBRAND FACTOR A DOMAIN-CONTAINING PROTEIN 8	70	0.457612
PTHR10146	PROLINE SYNTHETASE CO-TRANSCRIBED BACTERIAL HOMOLOG PROTEIN	303	0.457755
PTHR40068	TRANSCRIPTION REPRESSOR NIAR-RELATED	9	0.457767
PTHR43593	FAMILY NOT NAMED	80	0.457901
PTHR43493	DNA GYRASE/TOPOISOMERASE SUBUNIT A	156	0.457964
PTHR10799	SNF2/RAD54 HELICASE FAMILY	1234	0.457996
PTHR40638	UPF0591 MEMBRANE PROTEIN C15E1.02C	14	0.458137
PTHR30522	NUCLEOSIDE TRIPHOSPHATE PYROPHOSPHOHYDROLASE	32	0.458289
PTHR36455	FAMILY NOT NAMED	9	0.45842
PTHR42730	2-OXOGLUTARATE SYNTHASE SUBUNIT KORC	13	0.458538
PTHR10472	D-TYROSYL-TRNA TYR DEACYLASE	294	0.458561
PTHR10640	METHYLTHIORIBULOSE-1-PHOSPHATE DEHYDRATASE	209	0.458611
PTHR48083	MEDIUM-CHAIN SPECIFIC ACYL-COA DEHYDROGENASE, MITOCHONDRIAL-RELATED	546	0.458881
PTHR43423	ABC TRANSPORTER I FAMILY MEMBER 17	171	0.458911
PTHR30305	UNCHARACTERIZED	38	0.458922
PTHR43884	ACYL-COA DEHYDROGENASE	603	0.458936
PTHR32439	FERREDOXIN--NITRITE REDUCTASE, CHLOROPLASTIC	119	0.458981
PTHR47640	TRNA SELENOCYSTEINE 1-ASSOCIATED PROTEIN 1-RELATED-RELATED	979	0.458997
PTHR44117	INTRAFLAGELLAR TRANSPORT PROTEIN 88 HOMOLOG	94	0.459009
PTHR12919	30S RIBOSOMAL PROTEIN S16	323	0.459048
PTHR42716	L-ASPARTATE OXIDASE	144	0.459086
PTHR30087	UNCHARACTERIZED	26	0.459123
PTHR36118	ION-TRANSLOCATING OXIDOREDUCTASE COMPLEX SUBUNIT G	17	0.459269
PTHR11669	REPLICATION FACTOR C / DNA POLYMERASE III GAMMA-TAU SUBUNIT	1374	0.459308
PTHR10169	DNA TOPOISOMERASE/GYRASE	278	0.459319
PTHR36712	TRANSMEMBRANE PROTEIN	85	0.459365
PTHR11038	MITOCHONDRIAL IMPORT INNER MEMBRANE TRANSLOCASE SUBUNIT TIM10	220	0.459392
PTHR43187	GLUTAMINE AMIDOTRANSFERASE DUG3-RELATED	39	0.459443
PTHR12566	CYTOPLASMIC POLYADENYLATION ELEMENT BINDING PROTEIN CPEB	200	0.45949
PTHR24349	SERINE/THREONINE-PROTEIN KINASE	3522	0.459514
PTHR23059	CYSTEINE AND HISTIDINE-RICH PROTEIN 1	53	0.459554
PTHR42829	NADH-UBIQUINONE OXIDOREDUCTASE CHAIN 5	241	0.459571
PTHR43713	GLUTAMATE-1-SEMIALDEHYDE 2,1-AMINOMUTASE	172	0.45964
PTHR20383	RNA POLYMERASE II SUBUNIT A C-TERMINAL DOMAIN PHOSPHATASE	233	0.459897
PTHR31982	PHOTOSYSTEM I REACTION CENTER SUBUNIT II-1, CHLOROPLASTIC-RELATED	111	0.459898
PTHR31689	DIAMINOPIMELATE EPIMERASE, CHLOROPLASTIC	137	0.460167
PTHR12882	SUPPRESSOR OF TY 4	214	0.460229
PTHR42794	HEMIN IMPORT ATP-BINDING PROTEIN HMUV	26	0.460275
PTHR24350	SERINE/THREONINE-PROTEIN KINASE IAL-RELATED	479	0.460401
PTHR45685	HELICASE SRCAP-RELATED	355	0.460428
PTHR43783	UDP-N-ACETYLGLUCOSAMINE 1-CARBOXYVINYLTRANSFERASE	101	0.460456
PTHR43416	DIHYDROLIPOYLLYSINE-RESIDUE SUCCINYLTRANSFERASE COMPONENT OF 2-OXOGLUTARATE DEHYDROGENASE COMPLEX, MITOCHONDRIAL-RELATED	478	0.460555
PTHR37828	GSR2449 PROTEIN	8	0.460588
PTHR43070	FAMILY NOT NAMED	240	0.460592
PTHR10806	SIGNAL PEPTIDASE COMPLEX CATALYTIC SUBUNIT SEC11	355	0.460655
PTHR43457	NITROGENASE MOLYBDENUM-IRON PROTEIN ALPHA CHAIN	10	0.460685
PTHR21098	RIBOFLAVIN SYNTHASE ALPHA CHAIN	179	0.460724
PTHR11547	ARGININE OR CREATINE KINASE	279	0.460808
PTHR33753	1,4-BETA-D-GLUCAN CELLOBIOHYDROLASE B	52	0.461406
PTHR46466	GLYOXALASE DOMAIN-CONTAINING PROTEIN 4	56	0.461567
PTHR38045	CHROMOSOME 1, WHOLE GENOME SHOTGUN SEQUENCE	8	0.461577
PTHR42966	N-ACETYLNEURAMINATE SYNTHASE	78	0.46169
PTHR30292	UNCHARACTERIZED PROTEIN YBGL-RELATED	31	0.46176
PTHR48181	FAMILY NOT NAMED	1	0.46181
PTHR43463	NICOTINATE-NUCLEOTIDE--DIMETHYLBENZIMIDAZOLE PHOSPHORIBOSYLTRANSFERASE	27	0.461811
PTHR43034	ION-TRANSLOCATING OXIDOREDUCTASE COMPLEX SUBUNIT C	18	0.462049
PTHR38768	UPF0502 PROTEIN YCEH	11	0.462136
PTHR10749	PHOSPHORYLASE B KINASE REGULATORY SUBUNIT	165	0.462217
PTHR13259	BLADDER CANCER 10 KD PROTEIN HOMOLOG	68	0.462224
PTHR46701	GLYCOSYLTRANSFERASE-LIKE KOBITO 1	158	0.462359
PTHR38471	FOUR HELIX BUNDLE PROTEIN	7	0.462421
PTHR43507	NADH-UBIQUINONE OXIDOREDUCTASE CHAIN 4	224	0.462484
PTHR40699	UPF0179 PROTEIN MJ1627	7	0.462572
PTHR30501	UNCHARACTERIZED	14	0.462667
PTHR42921	ACETOACETYL-COA SYNTHETASE	87	0.462677
PTHR11751	ALANINE AMINOTRANSFERASE	449	0.462691
PTHR48157	FAMILY NOT NAMED	18	0.462712
PTHR34848	FAMILY NOT NAMED	27	0.462742
PTHR40459	CONSERVED HYPOTHETICAL ALANINE AND LEUCINE RICH PROTEIN	6	0.462802
PTHR43725	UDP-GLUCOSE 4-EPIMERASE	843	0.462882
PTHR30283	PEROXIDE STRESS RESPONSE PROTEIN YAAA	18	0.462886
PTHR45860	TRANSLATION INITIATION FACTOR EIF-2B SUBUNIT ALPHA	216	0.463011
PTHR43535	PHOSPHATIDATE CYTIDYLYLTRANSFERASE	13	0.463157
PTHR42880	HOMOCITRATE SYNTHASE	10	0.463223
PTHR43371	VITAMIN B12-DEPENDENT RIBONUCLEOTIDE REDUCTASE	55	0.463401
PTHR43352	ACETYL-COA SYNTHETASE	7	0.463408
PTHR12743	CYTOCHROME C1 HEME LYASE	139	0.46343
PTHR46132	DIGALACTOSYLDIACYLGLYCEROL SYNTHASE 2, CHLOROPLASTIC	237	0.463465
PTHR10046	ATP DEPENDENT LON PROTEASE FAMILY MEMBER	265	0.463829
PTHR43153	ELECTRON TRANSFER FLAVOPROTEIN ALPHA	237	0.463855
PTHR46559	TYROSINE-PROTEIN PHOSPHATASE NON-RECEPTOR TYPE 11	55	0.463999
PTHR48393	ATP-DEPENDENT CLP PROTEASE PROTEOLYTIC SUBUNIT	16	0.46403
PTHR33343	54S RIBOSOMAL PROTEIN BL35M	151	0.464065
PTHR12096	NUCLEAR PROTEIN SKIP-RELATED	214	0.464072
PTHR41733	UBIQUITIN-ASSOCIATED/TRANSLATION ELONGATION FACTOR EF1B, N-TERMINAL, EUKARYOTE	9	0.46435
PTHR10359	A/G-SPECIFIC ADENINE GLYCOSYLASE/ENDONUCLEASE III	62	0.464417
PTHR42252	DUF5616 DOMAIN-CONTAINING PROTEIN	6	0.464455
PTHR12233	VACUOLAR PROTEIN SORTING 26 RELATED	441	0.464499
PTHR12213	CORRINOID ADENOSYLTRANSFERASE	110	0.464504
PTHR24092	PROBABLE PHOSPHOLIPID-TRANSPORTING ATPASE	1769	0.464612
PTHR12879	SPHINGOLIPID DELTA 4 DESATURASE/C-4 HYDROXYLASE PROTEIN DES2	260	0.464719
PTHR38444	ENTEROBACTIN BIOSYNTHESIS PROTEIN YBDZ	13	0.46473
PTHR13061	DYNACTIN SUBUNIT P25	373	0.464832
PTHR12869	SMALL SEVEN TRANSMEMBRANE DOMAIN-CONTAINING PROTEIN	162	0.464885
PTHR46722	MITOCHONDRIAL IMPORT RECEPTOR SUBUNIT TOM7 HOMOLOG	50	0.464932
PTHR36895	FAMILY NOT NAMED	68	0.464942
PTHR37165	PEPTIDASE U56 FAMILY	11	0.465235
PTHR21343	DETHIOBIOTIN SYNTHETASE	56	0.465258
PTHR37163	CONSERVED PROTEIN	13	0.465533
PTHR45445	FAMILY NOT NAMED	19	0.465575
PTHR10657	PEPTIDYL-PROLYL CIS-TRANS ISOMERASE	242	0.465581
PTHR12064	METAL TRANSPORTER CNNM	737	0.465609
PTHR11060	PROTEIN MEMO1	230	0.465662
PTHR13140	MYOSIN	1824	0.465852
PTHR46509	PHOSPHOADENOSINE PHOSPHOSULFATE REDUCTASE	63	0.465979
PTHR11455	CRYPTOCHROME	715	0.466025
PTHR46482	5'-ADENYLYLSULFATE REDUCTASE 3, CHLOROPLASTIC	141	0.466098
PTHR42194	UPF0276 PROTEIN HI_1600	8	0.466139
PTHR10173	METHIONINE SULFOXIDE REDUCTASE	224	0.466175
PTHR47918	DNA-BINDING PROTEIN FIS	12	0.466203
PTHR33603	METHYLTRANSFERASE	119	0.466207
PTHR10362	HISTIDINE AMMONIA-LYASE	555	0.466309
PTHR33866	S-ADENOSYLMETHIONINE DECARBOXYLASE PROENZYME	39	0.46645
PTHR43640	OS07G0260300 PROTEIN	95	0.466485
PTHR38605	ATPASE-RELATED	9	0.466524
PTHR10715	60S RIBOSOMAL PROTEIN L6	315	0.466632
PTHR30106	INNER MEMBRANE PROTEIN YEIH-RELATED	29	0.466697
PTHR11943	GALACTOSE-1-PHOSPHATE URIDYLYLTRANSFERASE	98	0.466698
PTHR12741	LYST-INTERACTING PROTEIN LIP5 DOPAMINE RESPONSIVE PROTEIN DRG-1	785	0.466758
PTHR45674	DNA LIGASE 1/3 FAMILY MEMBER	372	0.466921
PTHR10977	DIPHOSPHOMEVALONATE DECARBOXYLASE	229	0.467048
PTHR33047	PROTEIN TAR1	126	0.467062
PTHR41700	GCN5-RELATED N-ACETYLTRANSFERASE	6	0.467128
PTHR47378	DIVINYL CHLOROPHYLLIDE A 8-VINYL-REDUCTASE, CHLOROPLASTIC	89	0.467168
PTHR37560	UPF0210 PROTEIN SPR0218	17	0.467213
PTHR43223	ALKYL/ARYL-SULFATASE	21	0.467228
PTHR46322	PUROMYCIN-SENSITIVE AMINOPEPTIDASE	107	0.46724
PTHR42946	PHOSPHOHEXOSE MUTASE	220	0.467252
PTHR21090	AROM/DEHYDROQUINATE SYNTHASE	213	0.467261
PTHR42940	ALCOHOL DEHYDROGENASE 1-RELATED	96	0.467364
PTHR37821	AMINO ACID TRANSPORTER YUIF-RELATED	17	0.467471
PTHR43147	PROTEIN TAS	177	0.467528
PTHR11255	DIACYLGLYCEROL KINASE	1026	0.467667
PTHR43720	2-AMINOMUCONIC SEMIALDEHYDE DEHYDROGENASE	95	0.467675
PTHR24353	CYCLIC NUCLEOTIDE-DEPENDENT PROTEIN KINASE	640	0.467884
PTHR45788	SUCCINATE/FUMARATE MITOCHONDRIAL TRANSPORTER-RELATED	253	0.468042
PTHR35342	TRICARBOXYLIC TRANSPORT PROTEIN	19	0.468157
PTHR32332	2-NITROPROPANE DIOXYGENASE	180	0.468324
PTHR39168	TRANSCRIPTIONAL REGULATOR-RELATED	11	0.468335
PTHR43116	PEPTIDE CHAIN RELEASE FACTOR 2	284	0.468362
PTHR43561	FAMILY NOT NAMED	79	0.468871
PTHR21493	CGI-141-RELATED/LIPASE CONTAINING PROTEIN	341	0.468881
PTHR41964	GLOBAL NITROGEN REGULATOR NRPR	7	0.4689
PTHR43552	DIAMINOBUTYRATE--2-OXOGLUTARATE AMINOTRANSFERASE	8	0.468957
PTHR42796	FUMARYLACETOACETATE HYDROLASE DOMAIN-CONTAINING PROTEIN 2A-RELATED	90	0.46898
PTHR34182	PROTEIN-EXPORT MEMBRANE PROTEIN SECG	29	0.469003
PTHR43087	LYSINE/ARGININE/ORNITHINE TRANSPORT SYSTEM KINASE	14	0.469094
PTHR12942	STEP II SPLICING FACTOR SLU7	229	0.469236
PTHR37167	1,4-DIHYDROXY-6-NAPHTOATE SYNTHASE	14	0.469291
PTHR30468	ALPHA-KETOGLUTARATE-DEPENDENT SULFONATE DIOXYGENASE	111	0.469299
PTHR33777	UPF0045 PROTEIN ECM15	53	0.469365
PTHR10666	UBIQUITIN	2022	0.469404
PTHR21075	ANAEROBIC RIBONUCLEOSIDE-TRIPHOSPHATE REDUCTASE	34	0.469438
PTHR30001	RIBONUCLEASE	131	0.469451
PTHR11089	GTP-BINDING PROTEIN-RELATED	489	0.469549
PTHR46355	UPF0428 PROTEIN CXORF56	67	0.469573
PTHR10379	MTG8 ETO EIGHT TWENTY ONE PROTEIN	121	0.469647
PTHR23290	UNCHARACTERIZED	173	0.46979
PTHR43114	ADENINE DEAMINASE	21	0.469803
PTHR46246	GUANOSINE-3',5'-BIS(DIPHOSPHATE) 3'-PYROPHOSPHOHYDROLASE MESH1	78	0.469847
PTHR40029	FAMILY NOT NAMED	5	0.469856
PTHR24351	RIBOSOMAL PROTEIN S6 KINASE	1139	0.469864
PTHR11108	FERROCHELATASE	325	0.469887
PTHR23075	PUTATIVE ATP-ASE	275	0.4703
PTHR47375	GB|AAF34833.1	99	0.470377
PTHR42307	PUP DEAMIDASE/DEPUPYLASE	7	0.470447
PTHR11774	GERANYLGERANYL TRANSFERASE TYPE BETA SUBUNIT	608	0.470486
PTHR11986	AMINOTRANSFERASE CLASS III	439	0.470493
PTHR13242	EUKARYOTIC TRANSLATION INITIATION FACTOR 3	197	0.470524
PTHR46435	E3 UBIQUITIN-PROTEIN LIGASE HECTD4-RELATED	39	0.470614
PTHR23405	MAINTENANCE OF KILLER 16 MAK16 PROTEIN-RELATED	411	0.470624
PTHR39556	PROTEIN, PUTATIVE-RELATED	8	0.470687
PTHR45679	ER DEGRADATION-ENHANCING ALPHA-MANNOSIDASE-LIKE PROTEIN 2	398	0.470879
PTHR30587	FLAGELLAR BIOSYNTHETIC PROTEIN FLIP	39	0.470915
PTHR44133	CLEAVAGE STIMULATION FACTOR SUBUNIT 1	146	0.470953
PTHR43574	EPIMERASE-RELATED	930	0.470962
PTHR21637	BTB/POZ DOMAIN-CONTAINING PROTEIN 10-RELATED	104	0.47097
PTHR10954	RIBONUCLEASE H2 SUBUNIT A	300	0.470986
PTHR36918	FAMILY NOT NAMED	13	0.471026
PTHR11778	SERYL-TRNA SYNTHETASE	448	0.47108
PTHR36111	INNER MEMBRANE PROTEIN-RELATED	15	0.471175
PTHR42682	HYDROGENASE-4 COMPONENT F	31	0.471264
PTHR43435	RIBULOKINASE	175	0.471288
PTHR34817	NUCLEOTIDYLTRANSFERASE	16	0.471461
PTHR34309	SLR1406 PROTEIN	29	0.471514
PTHR38447	TRANSCRIPTION FACTOR YDEB-RELATED	10	0.471551
PTHR34186	CYANATE HYDRATASE	101	0.471615
PTHR12534	30S RIBOSOMAL PROTEIN S2 PROKARYOTIC AND ORGANELLAR	243	0.47183
PTHR31354	OS01G0793500 PROTEIN	224	0.47199
PTHR40065	RNA-BINDING PROTEIN YHBY	32	0.472292
PTHR39189	UPF0173 METAL-DEPENDENT HYDROLASE YTKL	10	0.472372
PTHR11699	ALDEHYDE DEHYDROGENASE-RELATED	1143	0.472376
PTHR47307	GLUTATHIONE-REGULATED POTASSIUM-EFFLUX SYSTEM ANCILLARY PROTEIN KEFG	24	0.472468
PTHR41532	FIXS PROTEIN	8	0.472505
PTHR36706	UNNAMED PRODUCT	79	0.47275
PTHR43654	GLUTAMATE 5-KINASE	177	0.472773
PTHR48232	INSULIN RECEPTOR SUBSTRATE HOMOLOG	5	0.472868
PTHR31887	NEMATODE SPECIFIC PEPTIDE FAMILY, GROUP B	8	0.473123
PTHR43683	MULTIDRUG EFFLUX PROTEIN YFMO	8	0.473137
PTHR10890	CYSTEINYL-TRNA SYNTHETASE	444	0.473152
PTHR23078	VESICULAR-FUSION PROTEIN NSF	224	0.473163
PTHR43211	FUMARYLACETOACETATE HYDROLASE	12	0.473349
PTHR24314	NON-SPECIFIC LIPID TRANSFER PROTEIN-RELATED	252	0.473372
PTHR42769	SUPEROXIDE DISMUTASE	255	0.473435
PTHR10743	PROTEIN RER1	391	0.473448
PTHR10290	DNA TOPOISOMERASE I	272	0.473472
PTHR31501	CALCIUM RELEASE-ACTIVATED CALCIUM CHANNEL PROTEIN 1	135	0.473492
PTHR43629	PEPTIDYL-PROLYL CIS-TRANS ISOMERASE	105	0.473873
PTHR33252	THIRD ORF IN TRANSPOSON ISC1160	5	0.473994
PTHR10374	LACTOYLGLUTATHIONE LYASE GLYOXALASE I	195	0.474002
PTHR11659	GLUTAMYL-TRNA GLN AMIDOTRANSFERASE SUBUNIT B MITOCHONDRIAL AND PROKARYOTIC PET112-RELATED	240	0.474036
PTHR47464	MACOILIN	27	0.474036
PTHR10840	PROGRAMMED CELL DEATH PROTEIN 5	224	0.474038
PTHR43337	XANTHINE/URACIL PERMEASE C887.17-RELATED	270	0.474046
PTHR11384	ATP-BINDING CASSETTE, SUB-FAMILY D MEMBER	525	0.474057
PTHR43000	DTDP-D-GLUCOSE 4,6-DEHYDRATASE-RELATED	503	0.474103
PTHR10589	UBIQUITIN CARBOXYL-TERMINAL HYDROLASE	587	0.474108
PTHR30298	H REPEAT-ASSOCIATED PREDICTED TRANSPOSASE	12	0.474293
PTHR23077	AAA-FAMILY ATPASE	1458	0.474302
PTHR35923	MAJOR EXTRACELLULAR ENDOGLUCANASE	25	0.474437
PTHR11365	5-OXOPROLINASE RELATED	257	0.474599
PTHR34793	PROTEIN THYLAKOID FORMATION 1, CHLOROPLASTIC	95	0.474652
PTHR45709	LARGE SUBUNIT GTPASE 1 HOMOLOG-RELATED	296	0.474691
PTHR38480	SLR0254 PROTEIN	9	0.474886
PTHR36234	LYSYL ENDOPEPTIDASE	2	0.474963
PTHR42688	CONSERVED PROTEIN	11	0.474981
PTHR40351	PROTEIN CBG19323	16	0.474996
PTHR43375	OROTIDINE 5'-PHOSPHATE DECARBOXYLASE	14	0.47502
PTHR45987	39S RIBOSOMAL PROTEIN L12	603	0.475053
PTHR10972	OXYSTEROL-BINDING PROTEIN-RELATED	1453	0.475106
PTHR13767	TRNA-PSEUDOURIDINE SYNTHASE	209	0.475186
PTHR46852	ALKALINE CERAMIDASE	131	0.475207
PTHR13636	UNCHARACTERIZED	175	0.475214
PTHR34476	DNA-DIRECTED RNA POLYMERASE SUBUNIT OMEGA	32	0.475226
PTHR30182	L-SERINE DEHYDRATASE	60	0.475398
PTHR38106	RNA CHAPERONE PROQ	8	0.475447
PTHR11820	ACYLPYRUVASE	313	0.475525
PTHR22851	U3 SMALL NUCLEOLAR RNA U3 SNORNA ASSOCIATED PROTEIN	212	0.475534
PTHR35809	ARCHAETIDYLSERINE DECARBOXYLASE PROENZYME-RELATED	13	0.475597
PTHR36459	ORF	15	0.475632
PTHR34378	GLUTAMATE--CYSTEINE LIGASE, CHLOROPLASTIC	114	0.475679
PTHR40026	PROTEIN VEG	9	0.475734
PTHR11134	ADAPTOR COMPLEX SUBUNIT BETA FAMILY MEMBER	701	0.476208
PTHR10855	26S PROTEASOME NON-ATPASE REGULATORY SUBUNIT 12/COP9 SIGNALOSOME COMPLEX SUBUNIT 4	442	0.476299
PTHR14200	CYTOCHROME C OXIDASE POLYPEPTIDE	106	0.476303
PTHR36168	CHROMOSOME 1, WHOLE GENOME SHOTGUN SEQUENCE	23	0.476484
PTHR21060	ACETATE KINASE	97	0.476498
PTHR43519	ATP-DEPENDENT RNA HELICASE HRPB	22	0.47655
PTHR43779	DIOXYGENASE RV0097-RELATED	35	0.476745
PTHR40044	INTEGRAL MEMBRANE PROTEIN-RELATED	10	0.476786
PTHR12375	RNA-BINDING PROTEIN LUC7-RELATED	414	0.477068
PTHR36843	HEME-DEPENDENT PEROXIDASE YWFI-RELATED	15	0.477108
PTHR23007	CBL	126	0.477309
PTHR12403	TRAFFICKING PROTEIN PARTICLE COMPLEX SUBUNIT 2	413	0.477489
PTHR15362	PHOSPHATIDYLINOSITOL SYNTHASE	493	0.477545
PTHR31047	MEIOTICALLY UP-REGULATED GENE 157 PROTEIN	47	0.477583
PTHR34286	TRANSMEMBRANE PROTEIN	113	0.477643
PTHR46770	HOMEOBOX PROTEIN ORTHOPEDIA	49	0.477751
PTHR30506	INNER MEMBRANE PROTEIN	35	0.477776
PTHR37296	CONSERVED VIRULENCE FACTOR B	19	0.477799
PTHR24208	LIM/HOMEOBOX PROTEIN LHX	503	0.477799
PTHR40135	FAMILY NOT NAMED	15	0.477938
PTHR11947	PYRUVATE DEHYDROGENASE KINASE	444	0.477958
PTHR42811	SERINE ACETYLTRANSFERASE	371	0.477986
PTHR43380	2-OXOISOVALERATE DEHYDROGENASE SUBUNIT ALPHA, MITOCHONDRIAL	286	0.478073
PTHR30565	UNCHARACTERIZED	9	0.478082
PTHR43445	UDP-N-ACETYLMURAMATE--L-ALANINE LIGASE-RELATED	97	0.478233
PTHR46999	ALPHA-GLUCAN WATER DIKINASE 1, CHLOROPLASTIC-RELATED	138	0.478265
PTHR43023	PROTEIN TRIGALACTOSYLDIACYLGLYCEROL 3, CHLOROPLASTIC	137	0.478266
PTHR31332	7-HYDROXYMETHYL CHLOROPHYLL A REDUCTASE, CHLOROPLASTIC	95	0.478268
PTHR41695	1,4-ALPHA-GLUCAN BRANCHING ENZYME RV3031-RELATED	9	0.478398
PTHR45005	FAMILY NOT NAMED	96	0.478524
PTHR45646	SERINE/THREONINE-PROTEIN KINASE DOA-RELATED	537	0.47853
PTHR11208	RNA-BINDING PROTEIN RELATED	915	0.478532
PTHR44307	PHOSPHOETHANOLAMINE METHYLTRANSFERASE	175	0.478588
PTHR39647	ELONGATION FACTOR 1-BETA	10	0.478591
PTHR14154	UPF0041 BRAIN PROTEIN 44-RELATED	1369	0.478645
PTHR34699	FAMILY NOT NAMED	28	0.478912
PTHR22957	TBC1 DOMAIN FAMILY MEMBER GTPASE-ACTIVATING PROTEIN	3500	0.479089
PTHR43110	THIOL PEROXIDASE	41	0.479124
PTHR43757	AMINOMETHYLTRANSFERASE	335	0.479139
PTHR42947	COB--COM HETERODISULFIDE REDUCTASE SUBUNIT B 1	15	0.479169
PTHR43766	TRYPTOPHAN--TRNA LIGASE, MITOCHONDRIAL	224	0.479242
PTHR30002	EPOXYQUEUOSINE REDUCTASE	28	0.479376
PTHR48245	FAMILY NOT NAMED	19	0.479383
PTHR40588	MRNA INTERFERASE TOXIN YAFQ	11	0.479391
PTHR13886	JNK/SAPK-ASSOCIATED PROTEIN	103	0.479418
PTHR11241	DEOXYURIDINE 5'-TRIPHOSPHATE NUCLEOTIDOHYDROLASE	296	0.479624
PTHR13946	DNA-DIRECTED RNA POLYMERASE I,II,III	449	0.479666
PTHR10927	RIBOSOME MATURATION PROTEIN SBDS	254	0.479906
PTHR11827	SOLUTE CARRIER FAMILY 12, CATION COTRANSPORTERS	662	0.480013
PTHR30178	INNER MEMBRANE PROTEIN YAAH	15	0.480052
PTHR30272	3-HYDROXYACYL-[ACYL-CARRIER-PROTEIN] DEHYDRATASE	183	0.480276
PTHR18968	THIAMINE PYROPHOSPHATE ENZYMES	344	0.480378
PTHR42879	3-OXOACYL-(ACYL-CARRIER-PROTEIN) REDUCTASE	84	0.480615
PTHR24089	SOLUTE CARRIER FAMILY 25	1905	0.480691
PTHR45846	TRNA-DIHYDROURIDINE(47) SYNTHASE [NAD(P)(+)]-LIKE	209	0.480885
PTHR12695	GENERAL TRANSCRIPTION FACTOR IIH SUBUNIT 2	197	0.480905
PTHR43551	FUMARATE REDUCTASE IRON-SULFUR SUBUNIT	22	0.481045
PTHR42838	CYTOCHROME C OXIDASE SUBUNIT II	9	0.48129
PTHR42896	XYLULOSE-1,5-BISPHOSPHATE (XUBP) PHOSPHATASE	273	0.481336
PTHR31480	BIFUNCTIONAL LYCOPENE CYCLASE/PHYTOENE SYNTHASE	255	0.481341
PTHR43002	GLYCOGEN DEBRANCHING ENZYME	374	0.481517
PTHR11265	S-ADENOSYL-METHYLTRANSFERASE MRAW	208	0.481807
PTHR34651	SIMILAR TO ENSANGP00000021391	53	0.482081
PTHR34469	PHOTOSYSTEM II REACTION CENTER PROTEIN H	105	0.482104
PTHR15530	SERTA DOMAIN-CONTAINING PROTEIN 3	20	0.482122
PTHR28629	TRIOKINASE/FMN CYCLASE	226	0.482162
PTHR45754	METHYLENETETRAHYDROFOLATE REDUCTASE	283	0.48232
PTHR11358	ARGINASE/AGMATINASE	241	0.482466
PTHR31240	MATERNAL EFFECT EMBRYO ARREST 18	104	0.48254
PTHR30598	NITRATE REDUCTASE PRIVATE CHAPERONE, REDOX ENZYME MATURATION PROTEIN REMP FAMILY	21	0.482655
PTHR30181	MANNITOL PERMEASE IIC COMPONENT	19	0.482675
PTHR33876	UNNAMED PRODUCT	139	0.48269
PTHR38418	SUGAR ISOMERASE, KPSF/GUTQ (AFU_ORTHOLOGUE AFUA_6G08860)	32	0.482772
PTHR42208	HEAVY METAL TRANSPORTER-RELATED	8	0.482773
PTHR28161	ATP SYNTHASE SUBUNIT F, MITOCHONDRIAL	26	0.482919
PTHR43650	PYROPHOSPHATE--FRUCTOSE 6-PHOSPHATE 1-PHOSPHOTRANSFERASE	301	0.483028
PTHR30282	P-AMINOBENZOYL GLUTAMATE TRANSPORTER	14	0.483162
PTHR31214	PROTEIN FAM221A-RELATED	89	0.483467
PTHR38040	UBIQUINONE BIOSYNTHESIS ACCESSORY FACTOR UBIK	11	0.483491
PTHR45885	CELL DIVISION CYCLE 5-LIKE PROTEIN	215	0.483553
PTHR47948	TRANS-CINNAMATE 4-MONOOXYGENASE	186	0.483598
PTHR10363	BLEOMYCIN HYDROLASE	79	0.483609
PTHR42737	GLUTATHIONE REDUCTASE	142	0.48361
PTHR12195	CYTOPLASMIC FMR1-INTERACTING PROTEIN-RELATED	196	0.483734
PTHR11825	SUBGROUP IIII AMINOTRANSFERASE	175	0.483736
PTHR32057	PROTEIN ADENYLYLTRANSFERASE SELO, MITOCHONDRIAL	134	0.483763
PTHR39203	CYTOPLASMIC PROTEIN-RELATED	8	0.483773
PTHR10876	ZINC FINGER PROTEIN ZPR1	221	0.483779
PTHR45711	CHLORIDE CHANNEL PROTEIN	228	0.4839
PTHR36117	4-HYDROXYPHENYLACETATE 3-MONOOXYGENASE-RELATED	18	0.484285
PTHR35302	FAMILY NOT NAMED	86	0.484732
PTHR14843	DEUBIQUITINATING PROTEIN VCIP135	46	0.484755
PTHR11492	NUCLEAR FACTOR I	160	0.484879
PTHR43633	ALCOHOL DEHYDROGENASE YQHD	27	0.484888
PTHR43814	ARGININOSUCCINATE LYASE	242	0.484893
PTHR21342	PHOSPHOPANTETHEINE ADENYLYLTRANSFERASE	64	0.485265
PTHR46281	CYTOCHROME C OXIDASE SUBUNIT 6B	242	0.485331
PTHR35137	CHROMOPHORE LYASE CRL, CHLOROPLASTIC	89	0.485416
PTHR30135	UNCHARACTERIZED PROTEIN YVCK-RELATED	31	0.48544
PTHR31560	UPF0652 PROTEIN C16A11.03C-RELATED	39	0.485468
PTHR11845	UNCHARACTERIZED	298	0.485468
PTHR43178	DIHYDROLIPOAMIDE ACETYLTRANSFERASE COMPONENT OF PYRUVATE DEHYDROGENASE COMPLEX	313	0.485492
PTHR30365	CYTOCHROME D UBIQUINOL OXIDASE	58	0.48557
PTHR42938	FORMATE DEHYDROGENASE 1	828	0.48582
PTHR39332	BLL4707 PROTEIN	7	0.485866
PTHR42251	UPF0147 PROTEIN MJ1419	9	0.486046
PTHR47634	PROTEIN KINASE DOMAIN-CONTAINING PROTEIN-RELATED	465	0.486072
PTHR15276	H4 D10S170 PROTEIN-RELATED	80	0.4861
PTHR37450	CIPC PROTEIN	18	0.486126
PTHR42799	MITOCHONDRIAL PEPTIDE METHIONINE SULFOXIDE REDUCTASE	465	0.486473
PTHR33877	SLL1193 PROTEIN	117	0.486477
PTHR19858	WD40 REPEAT PROTEIN	204	0.486524
PTHR40697	ACETOIN CATABOLISM PROTEIN X	13	0.486594
PTHR42903	INNER MEMBRANE PROTEIN YCCF	20	0.486634
PTHR42771	IRON(3+)-HYDROXAMATE IMPORT ATP-BINDING PROTEIN FHUC	62	0.486643
PTHR11740	CASEIN KINASE II SUBUNIT BETA	462	0.48666
PTHR45837	VESICLE-TRAFFICKING PROTEIN SEC22B	290	0.486811
PTHR43090	1-(5-PHOSPHORIBOSYL)-5-[(5-PHOSPHORIBOSYLAMINO)METHYLIDENEAMINO] IMIDAZOLE-4-CARBOXAMIDE ISOMERASE	173	0.486829
PTHR47983	PTO-INTERACTING PROTEIN 1-LIKE	533	0.486854
PTHR10641	MYB FAMILY TRANSCRIPTION FACTOR	1935	0.486981
PTHR43117	OSMOPROTECTANT IMPORT ATP-BINDING PROTEIN OSMV	41	0.487357
PTHR47252	GLYCOSYLTRANSFERASE	102	0.48752
PTHR17605	RIBOSOME BIOGENESIS PROTEIN BOP1 BLOCK OF PROLIFERATION 1 PROTEIN	205	0.487684
PTHR22836	WD40 REPEAT PROTEIN	198	0.487784
PTHR30194	CROSSOVER JUNCTION ENDODEOXYRIBONUCLEASE RUVC	33	0.487836
PTHR43616	GLYCEROL DEHYDROGENASE	37	0.487838
PTHR43013	GLUTAMYL-TRNA REDUCTASE	30	0.487842
PTHR12588	MYOINOSITOL OXYGENASE	297	0.487869
PTHR20951	C13ORF1 PROTEIN-RELATED	68	0.487903
PTHR47961	DNA POLYMERASE THETA, PUTATIVE (AFU_ORTHOLOGUE AFUA_1G05260)-RELATED	317	0.487938
PTHR30041	ARSENATE REDUCTASE	68	0.488185
PTHR34185	DIADENYLATE CYCLASE	46	0.488212
PTHR42256	OXOGLUTARATE/IRON-DEPENDENT DIOXYGENASE	8	0.488278
PTHR11082	TRNA-DIHYDROURIDINE SYNTHASE	384	0.488288
PTHR43326	METHIONYL-TRNA SYNTHETASE	229	0.488348
PTHR30505	FRUCTOSE-LIKE PERMEASE	38	0.48838
PTHR43774	PEPTIDE METHIONINE SULFOXIDE REDUCTASE	36	0.488385
PTHR43710	2-HYDROXYACYL-COA LYASE	196	0.48848
PTHR24284	CYTOCHROME P450 FAMILY	13	0.488486
PTHR39173	ACETYLTRANSFERASE	9	0.488544
PTHR37170	GLUTAREDOXIN-RELATED	10	0.488592
PTHR38705	PROTEIN RDS1	20	0.488675
PTHR43510	AMINOTRANSFERASE FUNCTION, HYPOTHETICAL (EUROFUNG)	19	0.488733
PTHR15913	ACID CLUSTER PROTEIN 33	159	0.488746
PTHR19842	G BETA-LIKE PROTEIN GBL	206	0.48879
PTHR16592	FAMILY NOT NAMED	73	0.488834
PTHR14289	F-BOX ONLY PROTEIN 3	83	0.488954
PTHR36445	GTP CYCLOHYDROLASE MPTA	19	0.489045
PTHR10928	SUPPRESSOR OF FUSED	53	0.489048
PTHR21299	CYTIDYLATE KINASE/PANTOATE-BETA-ALANINE LIGASE	200	0.489187
PTHR30009	CYTOCHROME C-TYPE SYNTHESIS PROTEIN AND PTS TRANSMEMBRANE COMPONENT	49	0.489278
PTHR47683	PSEUDOURIDINE SYNTHASE FAMILY PROTEIN-RELATED	122	0.48962
PTHR30007	PHP DOMAIN PROTEIN	39	0.489648
PTHR35863	COBALT-PRECORRIN-5B C(1)-METHYLTRANSFERASE	18	0.489655
PTHR34229	METAL TRANSPORT PROTEIN HI_1621-RELATED	16	0.489743
PTHR40129	FAMILY NOT NAMED	8	0.489869
PTHR42687	L-THREONINE 3-DEHYDROGENASE	94	0.489913
PTHR45841	MRNA TURNOVER PROTEIN 4 MRTO4	224	0.49002
PTHR31246	MICROTUBULE-ASSOCIATED PROTEIN 70-2	309	0.490327
PTHR43706	NADH DEHYDROGENASE	538	0.490347
PTHR46365	COPPER TRANSPORT PROTEIN ATOX1	89	0.490351
PTHR28570	ASPARTYL AMINOPEPTIDASE	318	0.490435
PTHR23300	METHANETHIOL OXIDASE	209	0.490471
PTHR11787	RAB GDP-DISSOCIATION INHIBITOR	628	0.490508
PTHR43873	COBYRINATE A,C-DIAMIDE SYNTHASE	41	0.490573
PTHR19961	FIMBRIN/PLASTIN	482	0.490637
PTHR38039	TOXIN YOEB	13	0.490645
PTHR30433	CHEMOTAXIS PROTEIN MOTA	41	0.490763
PTHR16023	TAX1 BINDING PROTEIN-RELATED	243	0.490891
PTHR43082	FERREDOXIN-LIKE	16	0.490894
PTHR12133	TRNA (ADENINE(58)-N(1))-METHYLTRANSFERASE	269	0.490936
PTHR47161	LYMPHOID-SPECIFIC HELICASE	38	0.490943
PTHR32344	U1-TYPE DOMAIN-CONTAINING PROTEIN	33	0.491171
PTHR43025	MONOGALACTOSYLDIACYLGLYCEROL SYNTHASE	217	0.491245
PTHR10257	SERINE/THREONINE PROTEIN PHOSPHATASE 2A PP2A REGULATORY SUBUNIT B	999	0.491265
PTHR11706	SOLUTE CARRIER PROTEIN FAMILY 11 MEMBER	796	0.491297
PTHR10388	EUKARYOTIC TRANSLATION INITIATION FACTOR SUI1	777	0.491316
PTHR31687	FAMILY NOT NAMED	26	0.491447
PTHR48078	THREONINE DEHYDRATASE, MITOCHONDRIAL-RELATED	458	0.491483
PTHR41401	RGD1559909	16	0.491484
PTHR30612	SECA INNER MEMBRANE COMPONENT OF SEC PROTEIN SECRETION SYSTEM	227	0.491589
PTHR42910	TRANSPORTER SCO4007-RELATED	29	0.491623
PTHR42870	ACETYL-COA C-ACETYLTRANSFERASE	58	0.491674
PTHR38025	TRP OPERON REPRESSOR	10	0.491731
PTHR39964	UPF0292 PROTEIN TK1411	11	0.49182
PTHR42831	FE-S PROTEIN MATURATION AUXILIARY FACTOR YITW	44	0.491903
PTHR42881	PROLYL ENDOPEPTIDASE	244	0.491932
PTHR12858	RIBOSOME BIOGENESIS PROTEIN	408	0.492398
PTHR48080	D-GALACTONATE DEHYDRATASE-RELATED	72	0.492398
PTHR42765	SOLEUCYL-TRNA SYNTHETASE	250	0.492585
PTHR40274	VIRGINIAMYCIN B LYASE	14	0.492602
PTHR23422	DIPEPTIDYL PEPTIDASE III-RELATED	199	0.492735
PTHR37811	BLL5343 PROTEIN	12	0.49275
PTHR37311	2-PHOSPHOSULFOLACTATE PHOSPHATASE-RELATED	15	0.492873
PTHR36934	BLR0278 PROTEIN	17	0.49288
PTHR30105	UNCHARACTERIZED YIBQ-RELATED	14	0.492953
PTHR14986	RURM1 PROTEIN	187	0.492972
PTHR30544	23S RRNA METHYLTRANSFERASE	314	0.493021
PTHR11933	TRNA 5-METHYLAMINOMETHYL-2-THIOURIDYLATE -METHYLTRANSFERASE	165	0.493095
PTHR22914	CHITIN SYNTHASE	234	0.493215
PTHR43851	FAMILY NOT NAMED	221	0.493302
PTHR11441	THYMIDINE KINASE	261	0.493336
PTHR39643	CCA-ADDING ENZYME	10	0.493409
PTHR40275	SSL7038 PROTEIN	8	0.49344
PTHR21659	HYDROPHOBIC PROTEIN RCI2 LOW TEMPERATURE AND SALT RESPONSIVE PROTEIN LTI6 -RELATED	548	0.493525
PTHR31734	AUXIN-RESPONSIVE PROTEIN IAA17	1871	0.493597
PTHR11119	XANTHINE-URACIL / VITAMIN C PERMEASE FAMILY MEMBER	1056	0.493656
PTHR36076	THIOREDOXIN SUPERFAMILY PROTEIN	92	0.493664
PTHR13385	AUTOPHAGY PROTEIN 12	192	0.493909
PTHR18884	SEPTIN	798	0.49393
PTHR43268	THIOSULFATE SULFURTRANSFERASE/RHODANESE-LIKE DOMAIN-CONTAINING PROTEIN 2	312	0.493999
PTHR35136	CYCLOEUCALENOL CYCLOISOMERASE	98	0.494184
PTHR30217	PEPTIDASE U32 FAMILY	80	0.494221
PTHR34106	GLYCOSIDASE	26	0.494269
PTHR46802	TYROSINE-PROTEIN KINASE BAZ1B	34	0.494353
PTHR36047	OS01G0191000 PROTEIN	87	0.494366
PTHR47133	TALIN ROD DOMAIN-CONTAINING PROTEIN 1	32	0.494483
PTHR46074	CYSTEINE-RICH PROTEIN CRIP FAMILY MEMBER	110	0.494507
PTHR36816	ATP SYNTHASE PROTEIN YMF19	52	0.494536
PTHR12595	POS9-ACTIVATING FACTOR FAP7-RELATED	233	0.494572
PTHR45758	MITOFERRIN-1-RELATED	325	0.494666
PTHR35548	EXPRESSED PROTEIN	106	0.494675
PTHR31803	ALTERNATIVE OXIDASE	396	0.494713
PTHR37410	ADHESIN, PUTATIVE-RELATED	5	0.494884
PTHR31933	O-FUCOSYLTRANSFERASE 2-RELATED	424	0.494926
PTHR47157	CHROMODOMAIN-HELICASE-DNA-BINDING PROTEIN 1-LIKE	53	0.494933
PTHR47717	PEPTIDYL-PROLYL CIS-TRANS ISOMERASE FKBP19, CHLOROPLASTIC	84	0.494939
PTHR48099	C-1-TETRAHYDROFOLATE SYNTHASE, CYTOPLASMIC-RELATED	664	0.494958
PTHR11104	AMINOGLYCOSIDE N3-ACETYLTRANSFERASE	12	0.495062
PTHR42885	HISTIDINOL-PHOSPHATE AMINOTRANSFERASE-RELATED	180	0.495241
PTHR47917	FAMILY NOT NAMED	12	0.495336
PTHR33451	MALATE-2H(+)/NA(+)-LACTATE ANTIPORTER	40	0.495433
PTHR36848	DNA-BINDING PROTEIN (PUTATIVE SECRETED PROTEIN)-RELATED	7	0.495519
PTHR45806	SYNAPTOBREVIN HOMOLOG YKT6	254	0.49562
PTHR34571	(S)-UREIDOGLYCINE AMINOHYDROLASE	89	0.495627
PTHR10631	N 2 ,N 2 -DIMETHYLGUANOSINE TRNA METHYLTRANSFERASE	365	0.495645
PTHR11537	VOLTAGE-GATED POTASSIUM CHANNEL	1364	0.49569
PTHR40736	FAMILY NOT NAMED	6	0.495781
PTHR36113	LYASE, PUTATIVE-RELATED-RELATED	22	0.495951
PTHR35339	DUF2264 DOMAIN-CONTAINING PROTEIN	26	0.496024
PTHR11629	VACUOLAR PROTON ATPASES	553	0.496136
PTHR30161	FLAGELLAR EXPORT PROTEIN, MEMBRANE FLHA SUBUNIT-RELATED	38	0.496206
PTHR30075	GLYCYL-TRNA SYNTHETASE	108	0.4963
PTHR39419	SLL0814 PROTEIN	10	0.496302
PTHR12409	PREFOLDIN SUBUNIT 3	202	0.496397
PTHR40732	UPF0218 PROTEIN TK1697	9	0.496413
PTHR40088	PECTATE LYASE (EUROFUNG)	6	0.496524
PTHR10804	PROTEASE FAMILY M24 METHIONYL AMINOPEPTIDASE, AMINOPEPTIDASE P	260	0.496525
PTHR34195	PHOTOSYSTEM I REACTION CENTER SUBUNIT V, CHLOROPLASTIC-RELATED	190	0.496526
PTHR11099	VACUOLAR SORTING PROTEIN 35	275	0.496553
PTHR42803	ACYL-COA DEHYDROGENASE	30	0.496736
PTHR35787	GLYCEROL UPTAKE OPERON ANTITERMINATOR REGULATORY PROTEIN	16	0.496786
PTHR13008	MAP-KINASE ACTIVATING DEATH DOMAIN PROTEIN MADD /DENN/AEX-3 C.ELEGANS	61	0.496896
PTHR21164	CHORISMATE MUTASE	13	0.49711
PTHR43748	RIBOSE-5-PHOSPHATE ISOMERASE 3, CHLOROPLASTIC-RELATED	307	0.497237
PTHR23409	RIBONUCLEOSIDE-DIPHOSPHATE REDUCTASE SMALL CHAIN	414	0.497286
PTHR46111	RIBOSOMAL RNA SMALL SUBUNIT METHYLTRANSFERASE I	145	0.497486
PTHR46983	CYSTEINE AND HISTIDINE-RICH DOMAIN-CONTAINING PROTEIN 1	31	0.497632
PTHR41244	RHAMNAN SYNTHESIS F	4	0.497636
PTHR12834	SIGNAL RECOGNITION PARTICLE 9 KDA PROTEIN	183	0.497686
PTHR22780	ADAPTIN, ALPHA/GAMMA/EPSILON	713	0.497694
PTHR42684	ADENOSYLMETHIONINE-8-AMINO-7-OXONONANOATE AMINOTRANSFERASE	316	0.497758
PTHR30352	PYRUVATE FORMATE-LYASE-ACTIVATING ENZYME	110	0.498052
PTHR10218	GTP-BINDING PROTEIN ALPHA SUBUNIT	1391	0.498076
PTHR12103	5'-NUCLEOTIDASE DOMAIN-CONTAINING	538	0.498207
PTHR48023	D-XYLOSE-PROTON SYMPORTER-LIKE 2	274	0.498325
PTHR37957	BLR7070 PROTEIN	14	0.498379
PTHR46429	23S RRNA (GUANOSINE-2'-O-)-METHYLTRANSFERASE RLMB	49	0.498559
PTHR47708	FAMILY NOT NAMED	18	0.498614
PTHR48037	ATPASE E1	117	0.4987
PTHR45714	HOMEOBOX-LEUCINE ZIPPER PROTEIN HAT14	779	0.498884
PTHR11434	NADH-UBIQUINONE OXIDOREDUCTASE SUBUNIT ND4L	261	0.49898
PTHR12447	ANKYRIN REPEAT DOMAIN-CONTAINING PROTEIN 13	509	0.499114
PTHR43084	PERSULFIDE DIOXYGENASE ETHE1	221	0.499348
PTHR24058	DUAL SPECIFICITY PROTEIN KINASE	1222	0.4995
PTHR43303	NADPH DEHYDROGENASE C23G7.10C-RELATED	87	0.499693
PTHR45843	PEPTIDYL-PROLYL CIS-TRANS ISOMERASE-LIKE 4	217	0.499845
PTHR32479	GLYCOLATE OXIDASE IRON-SULFUR SUBUNIT	44	0.499937
PTHR11702	DEVELOPMENTALLY REGULATED GTP-BINDING PROTEIN-RELATED	491	0.500134
PTHR12241	TUBULIN POLYGLUTAMYLASE	634	0.50017
PTHR11024	NUCLEAR PORE COMPLEX PROTEIN SEC13 / SEH1 FAMILY MEMBER	472	0.500505
PTHR43478	NA+/H+ ANTIPORTER-RELATED	17	0.500554
PTHR31785	UPF0524 PROTEIN C3ORF70	37	0.500737
PTHR47105	OS02G0173600 PROTEIN	108	0.500918
PTHR12625	LIPOCALIN-1 INTERACTING MEMBRANE RECEPTOR LIMR	102	0.501048
PTHR11958	SODIUM/DICARBOXYLATE SYMPORTER-RELATED	394	0.501074
PTHR48177	TRANSMEMBRANE PROTEIN 189	50	0.501095
PTHR38773	PROTEIN SPRT	8	0.501142
PTHR43057	ARSENITE EFFLUX TRANSPORTER	59	0.501238
PTHR20836	DIHYDRODIPICOLINATE REDUCTASE	249	0.501252
PTHR22968	PROTEIN KINASE C, MU	144	0.501274
PTHR42925	MULTIDRUG AND TOXIN EFFLUX PROTEIN MATE FAMILY	13	0.501386
PTHR10322	DNA POLYMERASE CATALYTIC SUBUNIT	233	0.50139
PTHR45829	MITOCHONDRIAL CARRIER PROTEIN RIM2	155	0.501395
PTHR43848	PUTRESCINE TRANSPORT SYSTEM PERMEASE PROTEIN POTI	35	0.501399
PTHR12280	PANTOTHENATE KINASE	514	0.501677
PTHR35177	HYDROGENASE MATURATION FACTOR HYBG	25	0.501737
PTHR11777	ALANYL-TRNA SYNTHETASE	421	0.501955
PTHR14087	THYMOCYTE NUCLEAR PROTEIN 1	153	0.502051
PTHR47704	POTASSIUM TRANSPORTER KIMA	16	0.502107
PTHR43834	GTPASE DER	229	0.502116
[truncated: 13,664 more rows]
