# Supplementary material for: Unveiling the functional fate of duplicated genes through expression profiling and structural analysis
Source: HighWire-hosted journal article supplement (doi:10.1101/gr.280166.124), 2025-08-14
Supplement: Supplemental_Table_S2.xlsx [file Supplemental_Table_S2.xlsx]

## Sheet: Supplemental_Table_S2
Supplemental Table S2. Table showing duplication and speciation events, branch lengths, expected branch lengths, and statistical measures. The columns in order indicate: fam_id: family ID from PANTHER database, tail: the phylogenetic level at the tail of the speciation event, fam_tail_ev: evolutionary event observed in the tail of the branch, always a speciation event, head: the phylogenetic leve…
fam_id	tail	fam_tail_ev	head	fam_head_ev	length	over_duplication	expected_length	delta_exp	delta_exp_z	delta_exp_p
47199	eudicotyledons	SPECIATION	Pentapetalae	SPECIATION	0.035	False	0.041	-0.006	-0.289739	0.772016
12775	eudicotyledons	SPECIATION	Pentapetalae	SPECIATION	0.068	False	0.073	-0.005	-0.283294	0.776951
36793	eudicotyledons	SPECIATION	Pentapetalae	SPECIATION	0.127	False	0.112	0.015	-0.154398	0.877296
47650	eudicotyledons	SPECIATION	Pentapetalae	SPECIATION	0.099	False	0.091	0.008	-0.199511	0.841863
13322	eudicotyledons	SPECIATION	Pentapetalae	SPECIATION	0.249	False	0.118	0.131	0.5932	0.553047
12674	eudicotyledons	SPECIATION	Pentapetalae	SPECIATION	0.077	False	0.084	-0.007	-0.296184	0.76709
23160	eudicotyledons	SPECIATION	Pentapetalae	SPECIATION	0.163	False	0.146	0.017	-0.141508	0.887469
23160	eudicotyledons	SPECIATION	Pentapetalae	SPECIATION	0.162	False	0.146	0.016	-0.147953	0.88238
23160	eudicotyledons	SPECIATION	Pentapetalae	SPECIATION	0.234	False	0.146	0.088	0.316074	0.751947
23160	eudicotyledons	SPECIATION	Pentapetalae	SPECIATION	0.203	False	0.146	0.057	0.116284	0.907427
23160	eudicotyledons	SPECIATION	Pentapetalae	SPECIATION	0.145	False	0.146	-0.001	-0.257515	0.796781
23160	eudicotyledons	SPECIATION	Pentapetalae	SPECIATION	0.075	False	0.146	-0.071	-0.708652	0.478541
12072	eudicotyledons	SPECIATION	Pentapetalae	SPECIATION	0.108	False	0.088	0.02	-0.122174	0.902761
12072	eudicotyledons	SPECIATION	Pentapetalae	SPECIATION	0.146	False	0.088	0.058	0.122729	0.902322
32091	eudicotyledons	SPECIATION	Pentapetalae	SPECIATION	0.103	False	0.117	-0.014	-0.341297	0.73288
32091	eudicotyledons	SPECIATION	Pentapetalae	SPECIATION	0.096	False	0.117	-0.021	-0.386411	0.699192
32091	eudicotyledons	SPECIATION	Pentapetalae	SPECIATION	0.065	False	0.117	-0.052	-0.5862	0.557741
43254	eudicotyledons	SPECIATION	Pentapetalae	SPECIATION	0.081	False	0.065	0.016	-0.147953	0.88238
45826	eudicotyledons	SPECIATION	Pentapetalae	SPECIATION	0.097	True	0.075	0.022	-0.109284	0.912977
45826	eudicotyledons	SPECIATION	Pentapetalae	SPECIATION	0.085	True	0.075	0.01	-0.186622	0.851957
45826	eudicotyledons	SPECIATION	Pentapetalae	SPECIATION	0.239	True	0.075	0.164	0.805879	0.420312
45826	eudicotyledons	SPECIATION	Pentapetalae	SPECIATION	0.243	True	0.075	0.168	0.831658	0.405602
45826	eudicotyledons	SPECIATION	Pentapetalae	SPECIATION	0.066	False	0.075	-0.009	-0.309073	0.757266
12385	eudicotyledons	SPECIATION	Pentapetalae	SPECIATION	0.096	False	0.107	-0.011	-0.321963	0.747481
12385	eudicotyledons	SPECIATION	Pentapetalae	SPECIATION	0.033	False	0.107	-0.074	-0.727986	0.466622
12385	eudicotyledons	SPECIATION	Pentapetalae	SPECIATION	0.127	False	0.107	0.02	-0.122174	0.902761
12385	eudicotyledons	SPECIATION	Pentapetalae	SPECIATION	0.082	False	0.107	-0.025	-0.41219	0.6802
11669	eudicotyledons	SPECIATION	Pentapetalae	SPECIATION	0.026	False	0.053	-0.027	-0.42508	0.670778
11669	eudicotyledons	SPECIATION	Pentapetalae	SPECIATION	0.038	False	0.053	-0.015	-0.347742	0.728034
11669	eudicotyledons	SPECIATION	Pentapetalae	SPECIATION	0.015	False	0.053	-0.038	-0.495973	0.619914
11669	eudicotyledons	SPECIATION	Pentapetalae	SPECIATION	0.029	False	0.053	-0.024	-0.405745	0.68493
11669	eudicotyledons	SPECIATION	Pentapetalae	SPECIATION	0.084	False	0.053	0.031	-0.0512807	0.959102
11669	eudicotyledons	SPECIATION	Pentapetalae	SPECIATION	0.041	False	0.053	-0.012	-0.328408	0.742603
11669	eudicotyledons	SPECIATION	Pentapetalae	SPECIATION	0.069	False	0.053	0.016	-0.147953	0.88238
31245	eudicotyledons	SPECIATION	Pentapetalae	SPECIATION	0.227	True	0.141	0.086	0.303184	0.76175
31245	eudicotyledons	SPECIATION	Pentapetalae	SPECIATION	0.208	True	0.141	0.067	0.180732	0.856578
48035	eudicotyledons	SPECIATION	Pentapetalae	SPECIATION	0.162	True	0.078	0.084	0.290294	0.771591
48035	eudicotyledons	SPECIATION	Pentapetalae	SPECIATION	0.134	True	0.078	0.056	0.10984	0.912537
47350	eudicotyledons	SPECIATION	Pentapetalae	SPECIATION	0.033	False	0.103	-0.07	-0.702207	0.48255
31718	eudicotyledons	SPECIATION	Pentapetalae	SPECIATION	0.027	False	0.143	-0.116	-0.998668	0.317956
31718	eudicotyledons	SPECIATION	Pentapetalae	SPECIATION	0.15	False	0.143	0.007	-0.205956	0.836825
31718	eudicotyledons	SPECIATION	Pentapetalae	SPECIATION	0.174	False	0.143	0.031	-0.0512807	0.959102
31718	eudicotyledons	SPECIATION	Pentapetalae	SPECIATION	0.236	False	0.143	0.093	0.348298	0.727617
31718	eudicotyledons	SPECIATION	Pentapetalae	SPECIATION	0.132	False	0.143	-0.011	-0.321963	0.747481
36049	eudicotyledons	SPECIATION	Pentapetalae	SPECIATION	0.257	False	0.16	0.097	0.374077	0.708347
31676	eudicotyledons	SPECIATION	Pentapetalae	SPECIATION	0.102	False	0.11	-0.008	-0.302628	0.762173
31676	eudicotyledons	SPECIATION	Pentapetalae	SPECIATION	0.336	True	0.11	0.226	1.20546	0.228027
31676	eudicotyledons	SPECIATION	Pentapetalae	SPECIATION	0.271	True	0.11	0.161	0.786545	0.431548
31676	eudicotyledons	SPECIATION	Pentapetalae	SPECIATION	0.168	True	0.11	0.058	0.122729	0.902322
31676	eudicotyledons	SPECIATION	Pentapetalae	SPECIATION	0.097	False	0.11	-0.013	-0.334852	0.737736
31676	eudicotyledons	SPECIATION	Pentapetalae	SPECIATION	0.051	False	0.11	-0.059	-0.631314	0.527835
31676	eudicotyledons	SPECIATION	Pentapetalae	SPECIATION	0.039	False	0.11	-0.071	-0.708652	0.478541
31676	eudicotyledons	SPECIATION	Pentapetalae	SPECIATION	0.032	False	0.11	-0.078	-0.753765	0.45099
31676	eudicotyledons	SPECIATION	Pentapetalae	SPECIATION	0.171	True	0.11	0.061	0.142064	0.88703
31676	eudicotyledons	SPECIATION	Pentapetalae	SPECIATION	0.135	True	0.11	0.025	-0.0899496	0.928327
31676	eudicotyledons	SPECIATION	Pentapetalae	SPECIATION	0.043	False	0.11	-0.067	-0.682872	0.494688
31676	eudicotyledons	SPECIATION	Pentapetalae	SPECIATION	0.078	False	0.11	-0.032	-0.457304	0.647453
31676	eudicotyledons	SPECIATION	Pentapetalae	SPECIATION	0.078	False	0.11	-0.032	-0.457304	0.647453
31676	eudicotyledons	SPECIATION	Pentapetalae	SPECIATION	0.05	False	0.11	-0.06	-0.637759	0.523631
31676	eudicotyledons	SPECIATION	Pentapetalae	SPECIATION	0.147	True	0.11	0.037	-0.0126119	0.989937
31676	eudicotyledons	SPECIATION	Pentapetalae	SPECIATION	0.118	True	0.11	0.008	-0.199511	0.841863
11994	eudicotyledons	SPECIATION	Pentapetalae	SPECIATION	0.012	True	0.034	-0.022	-0.392856	0.694426
11994	eudicotyledons	SPECIATION	Pentapetalae	SPECIATION	0.012	True	0.034	-0.022	-0.392856	0.694426
11994	eudicotyledons	SPECIATION	Pentapetalae	SPECIATION	0.07	False	0.034	0.036	-0.0190567	0.984796
33286	eudicotyledons	SPECIATION	Pentapetalae	SPECIATION	0.225	False	0.264	-0.039	-0.502418	0.615374
10629	eudicotyledons	SPECIATION	Pentapetalae	SPECIATION	0.22	True	0.085	0.135	0.61898	0.53593
10629	eudicotyledons	SPECIATION	Pentapetalae	SPECIATION	0.202	True	0.085	0.117	0.502973	0.614983
10629	eudicotyledons	SPECIATION	Pentapetalae	SPECIATION	0.218	True	0.085	0.133	0.60609	0.544455
10629	eudicotyledons	SPECIATION	Pentapetalae	SPECIATION	0.038	False	0.085	-0.047	-0.553976	0.579595
37232	eudicotyledons	SPECIATION	Pentapetalae	SPECIATION	0.202	False	0.161	0.041	0.0131674	0.989494
14150	eudicotyledons	SPECIATION	Pentapetalae	SPECIATION	0.113	False	0.103	0.01	-0.186622	0.851957
36410	eudicotyledons	SPECIATION	Pentapetalae	SPECIATION	0.116	False	0.19	-0.074	-0.727986	0.466622
18952	eudicotyledons	SPECIATION	Pentapetalae	SPECIATION	0.127	False	0.105	0.022	-0.109284	0.912977
18952	eudicotyledons	SPECIATION	Pentapetalae	SPECIATION	0.254	True	0.105	0.149	0.709207	0.478196
18952	eudicotyledons	SPECIATION	Pentapetalae	SPECIATION	0.132	True	0.105	0.027	-0.07706	0.938576
18952	eudicotyledons	SPECIATION	Pentapetalae	SPECIATION	0.069	False	0.105	-0.036	-0.483083	0.629037
18952	eudicotyledons	SPECIATION	Pentapetalae	SPECIATION	0.207	False	0.105	0.102	0.406301	0.684522
13952	eudicotyledons	SPECIATION	Pentapetalae	SPECIATION	0.033	False	0.069	-0.036	-0.483083	0.629037
13952	eudicotyledons	SPECIATION	Pentapetalae	SPECIATION	0.088	False	0.069	0.019	-0.128618	0.89766
13952	eudicotyledons	SPECIATION	Pentapetalae	SPECIATION	0.009	False	0.069	-0.06	-0.637759	0.523631
21043	eudicotyledons	SPECIATION	Pentapetalae	SPECIATION	0.112	False	0.084	0.028	-0.0706152	0.943704
21043	eudicotyledons	SPECIATION	Pentapetalae	SPECIATION	0.149	False	0.084	0.065	0.167843	0.866707
47108	eudicotyledons	SPECIATION	Pentapetalae	SPECIATION	0.053	False	0.085	-0.032	-0.457304	0.647453
46993	eudicotyledons	SPECIATION	Pentapetalae	SPECIATION	0.185	False	0.257	-0.072	-0.715096	0.474549
14140	eudicotyledons	SPECIATION	Pentapetalae	SPECIATION	0.033	False	0.081	-0.048	-0.560421	0.575192
12111	eudicotyledons	SPECIATION	Pentapetalae	SPECIATION	0.022	False	0.062	-0.04	-0.508862	0.610849
12111	eudicotyledons	SPECIATION	Pentapetalae	SPECIATION	0.037	False	0.062	-0.025	-0.41219	0.6802
35320	eudicotyledons	SPECIATION	Pentapetalae	SPECIATION	0.072	False	0.108	-0.036	-0.483083	0.629037
31766	eudicotyledons	SPECIATION	Pentapetalae	SPECIATION	0.255	True	0.136	0.119	0.515863	0.60595
31766	eudicotyledons	SPECIATION	Pentapetalae	SPECIATION	0.186	True	0.136	0.05	0.0711707	0.943262
20900	eudicotyledons	SPECIATION	Pentapetalae	SPECIATION	0.066	False	0.063	0.003	-0.231735	0.816743
32018	eudicotyledons	SPECIATION	Pentapetalae	SPECIATION	0.117	False	0.105	0.012	-0.173732	0.862076
32018	eudicotyledons	SPECIATION	Pentapetalae	SPECIATION	0.256	True	0.105	0.151	0.722097	0.470235
32018	eudicotyledons	SPECIATION	Pentapetalae	SPECIATION	0.087	True	0.105	-0.018	-0.367077	0.713562
12181	eudicotyledons	SPECIATION	Pentapetalae	SPECIATION	0.049	False	0.083	-0.034	-0.470194	0.638217
12181	eudicotyledons	SPECIATION	Pentapetalae	SPECIATION	0.12	False	0.083	0.037	-0.0126119	0.989937
46691	eudicotyledons	SPECIATION	Pentapetalae	SPECIATION	0.139	False	0.139	0	-0.25107	0.80176
46691	eudicotyledons	SPECIATION	Pentapetalae	SPECIATION	1.453	True	0.139	1.314	8.21741	2.22045e-16
46691	eudicotyledons	SPECIATION	Pentapetalae	SPECIATION	0.438	True	0.139	0.299	1.67593	0.0937521
46691	eudicotyledons	SPECIATION	Pentapetalae	SPECIATION	0.105	False	0.139	-0.034	-0.470194	0.638217
31394	eudicotyledons	SPECIATION	Pentapetalae	SPECIATION	0.14	False	0.11	0.03	-0.0577256	0.953967
35276	eudicotyledons	SPECIATION	Pentapetalae	SPECIATION	0.128	False	0.074	0.054	0.0969499	0.922766
46871	eudicotyledons	SPECIATION	Pentapetalae	SPECIATION	0.111	False	0.162	-0.051	-0.579755	0.56208
37728	eudicotyledons	SPECIATION	Pentapetalae	SPECIATION	0.317	False	0.276	0.041	0.0131674	0.989494
37898	eudicotyledons	SPECIATION	Pentapetalae	SPECIATION	0.128	False	0.071	0.057	0.116284	0.907427
13454	eudicotyledons	SPECIATION	Pentapetalae	SPECIATION	0.147	False	0.126	0.021	-0.115729	0.907867
28242	eudicotyledons	SPECIATION	Pentapetalae	SPECIATION	0.095	True	0.138	-0.043	-0.528197	0.597363
28242	eudicotyledons	SPECIATION	Pentapetalae	SPECIATION	0.131	True	0.138	-0.007	-0.296184	0.76709
28242	eudicotyledons	SPECIATION	Pentapetalae	SPECIATION	0.039	False	0.138	-0.099	-0.889106	0.373946
28242	eudicotyledons	SPECIATION	Pentapetalae	SPECIATION	0.669	True	0.138	0.531	3.17113	0.0015185
28242	eudicotyledons	SPECIATION	Pentapetalae	SPECIATION	0.62	True	0.138	0.482	2.85533	0.00429922
28242	eudicotyledons	SPECIATION	Pentapetalae	SPECIATION	0.207	True	0.138	0.069	0.193622	0.846472
28242	eudicotyledons	SPECIATION	Pentapetalae	SPECIATION	0.198	True	0.138	0.06	0.135619	0.892123
28242	eudicotyledons	SPECIATION	Pentapetalae	SPECIATION	0.09	True	0.138	-0.048	-0.560421	0.575192
11055	eudicotyledons	SPECIATION	Pentapetalae	SPECIATION	0.174	False	0.076	0.098	0.380522	0.703558
11055	eudicotyledons	SPECIATION	Pentapetalae	SPECIATION	0.069	False	0.076	-0.007	-0.296184	0.76709
11055	eudicotyledons	SPECIATION	Pentapetalae	SPECIATION	0.047	False	0.076	-0.029	-0.437969	0.661408
11055	eudicotyledons	SPECIATION	Pentapetalae	SPECIATION	0.056	False	0.076	-0.02	-0.379966	0.703971
32343	eudicotyledons	SPECIATION	Pentapetalae	SPECIATION	0.035	False	0.069	-0.034	-0.470194	0.638217
32343	eudicotyledons	SPECIATION	Pentapetalae	SPECIATION	0.047	True	0.069	-0.022	-0.392856	0.694426
32343	eudicotyledons	SPECIATION	Pentapetalae	SPECIATION	0.034	True	0.069	-0.035	-0.476638	0.63362
32343	eudicotyledons	SPECIATION	Pentapetalae	SPECIATION	0.056	False	0.069	-0.013	-0.334852	0.737736
32343	eudicotyledons	SPECIATION	Pentapetalae	SPECIATION	0.105	False	0.069	0.036	-0.0190567	0.984796
32343	eudicotyledons	SPECIATION	Pentapetalae	SPECIATION	0.155	True	0.069	0.086	0.303184	0.76175
32343	eudicotyledons	SPECIATION	Pentapetalae	SPECIATION	0.115	True	0.069	0.046	0.0453914	0.963795
32343	eudicotyledons	SPECIATION	Pentapetalae	SPECIATION	0.266	True	0.069	0.197	1.01856	0.308413
32343	eudicotyledons	SPECIATION	Pentapetalae	SPECIATION	0.141	True	0.069	0.072	0.212957	0.831361
32343	eudicotyledons	SPECIATION	Pentapetalae	SPECIATION	0.114	True	0.069	0.045	0.0389466	0.968933
32343	eudicotyledons	SPECIATION	Pentapetalae	SPECIATION	0.078	False	0.069	0.009	-0.193067	0.846907
46867	eudicotyledons	SPECIATION	Pentapetalae	SPECIATION	0.056	False	0.105	-0.049	-0.566866	0.570805
13483	eudicotyledons	SPECIATION	Pentapetalae	SPECIATION	0.188	False	0.115	0.073	0.219401	0.826337
13483	eudicotyledons	SPECIATION	Pentapetalae	SPECIATION	0.172	False	0.115	0.057	0.116284	0.907427
10782	eudicotyledons	SPECIATION	Pentapetalae	SPECIATION	0.153	False	0.112	0.041	0.0131674	0.989494
10782	eudicotyledons	SPECIATION	Pentapetalae	SPECIATION	0.079	False	0.112	-0.033	-0.463749	0.642828
45732	eudicotyledons	SPECIATION	Pentapetalae	SPECIATION	0.057	False	0.035	0.022	-0.109284	0.912977
45732	eudicotyledons	SPECIATION	Pentapetalae	SPECIATION	0.023	True	0.035	-0.012	-0.328408	0.742603
45732	eudicotyledons	SPECIATION	Pentapetalae	SPECIATION	0.012	True	0.035	-0.023	-0.399301	0.689672
33620	eudicotyledons	SPECIATION	Pentapetalae	SPECIATION	0.097	False	0.078	0.019	-0.128618	0.89766
37390	eudicotyledons	SPECIATION	Pentapetalae	SPECIATION	0.102	False	0.11	-0.008	-0.302628	0.762173
11954	eudicotyledons	SPECIATION	Pentapetalae	SPECIATION	0.42	True	0.092	0.328	1.86283	0.0624864
11954	eudicotyledons	SPECIATION	Pentapetalae	SPECIATION	0.108	True	0.092	0.016	-0.147953	0.88238
11954	eudicotyledons	SPECIATION	Pentapetalae	SPECIATION	0.038	False	0.092	-0.054	-0.59909	0.549113
11954	eudicotyledons	SPECIATION	Pentapetalae	SPECIATION	0.056	False	0.092	-0.036	-0.483083	0.629037
46594	eudicotyledons	SPECIATION	Pentapetalae	SPECIATION	0.09	False	0.049	0.041	0.0131674	0.989494
12189	eudicotyledons	SPECIATION	Pentapetalae	SPECIATION	0.028	False	0.065	-0.037	-0.489528	0.624468
12189	eudicotyledons	SPECIATION	Pentapetalae	SPECIATION	0.11	False	0.065	0.045	0.0389466	0.968933
45844	eudicotyledons	SPECIATION	Pentapetalae	SPECIATION	0.152	False	0.097	0.055	0.103395	0.91765
45844	eudicotyledons	SPECIATION	Pentapetalae	SPECIATION	0.221	True	0.097	0.124	0.548087	0.583632
45844	eudicotyledons	SPECIATION	Pentapetalae	SPECIATION	0.185	True	0.097	0.088	0.316074	0.751947
45844	eudicotyledons	SPECIATION	Pentapetalae	SPECIATION	0.119	False	0.097	0.022	-0.109284	0.912977
45844	eudicotyledons	SPECIATION	Pentapetalae	SPECIATION	0.042	False	0.097	-0.055	-0.605535	0.544824
45844	eudicotyledons	SPECIATION	Pentapetalae	SPECIATION	0.096	True	0.097	-0.001	-0.257515	0.796781
45844	eudicotyledons	SPECIATION	Pentapetalae	SPECIATION	0.031	True	0.097	-0.066	-0.676427	0.498769
43096	eudicotyledons	SPECIATION	Pentapetalae	SPECIATION	0.175	False	0.09	0.085	0.296739	0.766666
43096	eudicotyledons	SPECIATION	Pentapetalae	SPECIATION	0.926	True	0.09	0.836	5.13679	2.79467e-07
43096	eudicotyledons	SPECIATION	Pentapetalae	SPECIATION	0.131	True	0.09	0.041	0.0131674	0.989494
43096	eudicotyledons	SPECIATION	Pentapetalae	SPECIATION	0.066	False	0.09	-0.024	-0.405745	0.68493
43096	eudicotyledons	SPECIATION	Pentapetalae	SPECIATION	0.096	False	0.09	0.006	-0.212401	0.831794
43096	eudicotyledons	SPECIATION	Pentapetalae	SPECIATION	0.031	False	0.09	-0.059	-0.631314	0.527835
43096	eudicotyledons	SPECIATION	Pentapetalae	SPECIATION	0.107	False	0.09	0.017	-0.141508	0.887469
43096	eudicotyledons	SPECIATION	Pentapetalae	SPECIATION	0.099	False	0.09	0.009	-0.193067	0.846907
31279	eudicotyledons	SPECIATION	Pentapetalae	SPECIATION	0.046	False	0.086	-0.04	-0.508862	0.610849
31279	eudicotyledons	SPECIATION	Pentapetalae	SPECIATION	0.074	False	0.086	-0.012	-0.328408	0.742603
31279	eudicotyledons	SPECIATION	Pentapetalae	SPECIATION	0.038	False	0.086	-0.048	-0.560421	0.575192
31279	eudicotyledons	SPECIATION	Pentapetalae	SPECIATION	0.074	False	0.086	-0.012	-0.328408	0.742603
31279	eudicotyledons	SPECIATION	Pentapetalae	SPECIATION	0.02	False	0.086	-0.066	-0.676427	0.498769
31279	eudicotyledons	SPECIATION	Pentapetalae	SPECIATION	0.075	False	0.086	-0.011	-0.321963	0.747481
31279	eudicotyledons	SPECIATION	Pentapetalae	SPECIATION	0.229	True	0.086	0.143	0.670538	0.502515
31279	eudicotyledons	SPECIATION	Pentapetalae	SPECIATION	0.188	True	0.086	0.102	0.406301	0.684522
31279	eudicotyledons	SPECIATION	Pentapetalae	SPECIATION	0.183	True	0.086	0.097	0.374077	0.708347
12734	eudicotyledons	SPECIATION	Pentapetalae	SPECIATION	0.035	False	0.046	-0.011	-0.321963	0.747481
24115	eudicotyledons	SPECIATION	Pentapetalae	SPECIATION	0.096	False	0.049	0.047	0.0518362	0.958659
24115	eudicotyledons	SPECIATION	Pentapetalae	SPECIATION	0.049	False	0.049	0	-0.25107	0.80176
24115	eudicotyledons	SPECIATION	Pentapetalae	SPECIATION	0.063	False	0.049	0.014	-0.160843	0.872217
24115	eudicotyledons	SPECIATION	Pentapetalae	SPECIATION	0.13	False	0.049	0.081	0.27096	0.786422
24115	eudicotyledons	SPECIATION	Pentapetalae	SPECIATION	0.075	False	0.049	0.026	-0.0835048	0.93345
24115	eudicotyledons	SPECIATION	Pentapetalae	SPECIATION	0.034	False	0.049	-0.015	-0.347742	0.728034
12133	eudicotyledons	SPECIATION	Pentapetalae	SPECIATION	0.041	False	0.056	-0.015	-0.347742	0.728034
10352	eudicotyledons	SPECIATION	Pentapetalae	SPECIATION	0.115	False	0.082	0.033	-0.0383911	0.969376
10352	eudicotyledons	SPECIATION	Pentapetalae	SPECIATION	0.074	False	0.082	-0.008	-0.302628	0.762173
10352	eudicotyledons	SPECIATION	Pentapetalae	SPECIATION	0.167	False	0.082	0.085	0.296739	0.766666
10352	eudicotyledons	SPECIATION	Pentapetalae	SPECIATION	0.09	False	0.082	0.008	-0.199511	0.841863
10352	eudicotyledons	SPECIATION	Pentapetalae	SPECIATION	0.218	True	0.082	0.136	0.625425	0.531692
10352	eudicotyledons	SPECIATION	Pentapetalae	SPECIATION	0.154	True	0.082	0.072	0.212957	0.831361
10352	eudicotyledons	SPECIATION	Pentapetalae	SPECIATION	1.607	False	0.082	1.525	9.57727	0
10352	eudicotyledons	SPECIATION	Pentapetalae	SPECIATION	0.126	False	0.082	0.044	0.0325018	0.974072
10352	eudicotyledons	SPECIATION	Pentapetalae	SPECIATION	0.044	False	0.082	-0.038	-0.495973	0.619914
12895	eudicotyledons	SPECIATION	Pentapetalae	SPECIATION	0.09	False	0.066	0.024	-0.0963944	0.923207
30618	eudicotyledons	SPECIATION	Pentapetalae	SPECIATION	0.084	False	0.077	0.007	-0.205956	0.836825
14580	eudicotyledons	SPECIATION	Pentapetalae	SPECIATION	0.096	False	0.086	0.01	-0.186622	0.851957
10869	eudicotyledons	SPECIATION	Pentapetalae	SPECIATION	0.076	False	0.074	0.002	-0.23818	0.811741
10869	eudicotyledons	SPECIATION	Pentapetalae	SPECIATION	0.064	False	0.074	-0.01	-0.315518	0.752368
10869	eudicotyledons	SPECIATION	Pentapetalae	SPECIATION	0.054	False	0.074	-0.02	-0.379966	0.703971
10869	eudicotyledons	SPECIATION	Pentapetalae	SPECIATION	0.176	False	0.074	0.102	0.406301	0.684522
10869	eudicotyledons	SPECIATION	Pentapetalae	SPECIATION	0.054	False	0.074	-0.02	-0.379966	0.703971
10869	eudicotyledons	SPECIATION	Pentapetalae	SPECIATION	0.028	False	0.074	-0.046	-0.547531	0.584014
10869	eudicotyledons	SPECIATION	Pentapetalae	SPECIATION	0.046	False	0.074	-0.028	-0.431525	0.666087
10869	eudicotyledons	SPECIATION	Pentapetalae	SPECIATION	0.062	False	0.074	-0.012	-0.328408	0.742603
23317	eudicotyledons	SPECIATION	Pentapetalae	SPECIATION	0.051	False	0.069	-0.018	-0.367077	0.713562
33512	eudicotyledons	SPECIATION	Pentapetalae	SPECIATION	0.189	False	0.147	0.042	0.0196122	0.984353
33512	eudicotyledons	SPECIATION	Pentapetalae	SPECIATION	0.191	False	0.147	0.044	0.0325018	0.974072
33512	eudicotyledons	SPECIATION	Pentapetalae	SPECIATION	0.089	False	0.147	-0.058	-0.624869	0.532057
12195	eudicotyledons	SPECIATION	Pentapetalae	SPECIATION	0.065	False	0.056	0.009	-0.193067	0.846907
42829	eudicotyledons	SPECIATION	Pentapetalae	SPECIATION	0.033	False	0.053	-0.02	-0.379966	0.703971
36498	eudicotyledons	SPECIATION	Pentapetalae	SPECIATION	0.067	False	0.051	0.016	-0.147953	0.88238
47976	eudicotyledons	SPECIATION	Pentapetalae	SPECIATION	0.164	True	0.093	0.071	0.206512	0.836391
47976	eudicotyledons	SPECIATION	Pentapetalae	SPECIATION	0.181	True	0.093	0.088	0.316074	0.751947
47976	eudicotyledons	SPECIATION	Pentapetalae	SPECIATION	0.049	False	0.093	-0.044	-0.534642	0.592898
47976	eudicotyledons	SPECIATION	Pentapetalae	SPECIATION	0.121	True	0.093	0.028	-0.0706152	0.943704
47976	eudicotyledons	SPECIATION	Pentapetalae	SPECIATION	0.164	True	0.093	0.071	0.206512	0.836391
47976	eudicotyledons	SPECIATION	Pentapetalae	SPECIATION	0.078	False	0.093	-0.015	-0.347742	0.728034
47976	eudicotyledons	SPECIATION	Pentapetalae	SPECIATION	0.033	False	0.093	-0.06	-0.637759	0.523631
47976	eudicotyledons	SPECIATION	Pentapetalae	SPECIATION	0.384	True	0.093	0.291	1.62437	0.104297
47976	eudicotyledons	SPECIATION	Pentapetalae	SPECIATION	0.18	True	0.093	0.087	0.309629	0.756843
47976	eudicotyledons	SPECIATION	Pentapetalae	SPECIATION	0.094	False	0.093	0.001	-0.244625	0.806747
47976	eudicotyledons	SPECIATION	Pentapetalae	SPECIATION	0.235	True	0.093	0.142	0.664093	0.506631
47976	eudicotyledons	SPECIATION	Pentapetalae	SPECIATION	0.164	True	0.093	0.071	0.206512	0.836391
13129	eudicotyledons	SPECIATION	Pentapetalae	SPECIATION	0.077	False	0.075	0.002	-0.23818	0.811741
16052	eudicotyledons	SPECIATION	Pentapetalae	SPECIATION	0.103	False	0.084	0.019	-0.128618	0.89766
47125	eudicotyledons	SPECIATION	Pentapetalae	SPECIATION	0.064	False	0.09	-0.026	-0.418635	0.675483
21686	eudicotyledons	SPECIATION	Pentapetalae	SPECIATION	0.108	False	0.101	0.007	-0.205956	0.836825
45878	eudicotyledons	SPECIATION	Pentapetalae	SPECIATION	0.074	False	0.086	-0.012	-0.328408	0.742603
45878	eudicotyledons	SPECIATION	Pentapetalae	SPECIATION	0.299	True	0.086	0.213	1.12168	0.262001
45878	eudicotyledons	SPECIATION	Pentapetalae	SPECIATION	0.197	True	0.086	0.111	0.464304	0.64243
45878	eudicotyledons	SPECIATION	Pentapetalae	SPECIATION	0.096	True	0.086	0.01	-0.186622	0.851957
14052	eudicotyledons	SPECIATION	Pentapetalae	SPECIATION	0.118	False	0.081	0.037	-0.0126119	0.989937
44998	eudicotyledons	SPECIATION	Pentapetalae	SPECIATION	0.03	False	0.044	-0.014	-0.341297	0.73288
23316	eudicotyledons	SPECIATION	Pentapetalae	SPECIATION	0.031	False	0.074	-0.043	-0.528197	0.597363
23316	eudicotyledons	SPECIATION	Pentapetalae	SPECIATION	0.031	False	0.074	-0.043	-0.528197	0.597363
35706	eudicotyledons	SPECIATION	Pentapetalae	SPECIATION	0.079	False	0.097	-0.018	-0.367077	0.713562
34949	eudicotyledons	SPECIATION	Pentapetalae	SPECIATION	0.166	False	0.151	0.015	-0.154398	0.877296
34949	eudicotyledons	SPECIATION	Pentapetalae	SPECIATION	0.171	False	0.151	0.02	-0.122174	0.902761
34949	eudicotyledons	SPECIATION	Pentapetalae	SPECIATION	0.209	False	0.151	0.058	0.122729	0.902322
12818	eudicotyledons	SPECIATION	Pentapetalae	SPECIATION	0.084	False	0.067	0.017	-0.141508	0.887469
35130	eudicotyledons	SPECIATION	Pentapetalae	SPECIATION	1.482	True	0.07	1.412	8.849	0
35130	eudicotyledons	SPECIATION	Pentapetalae	SPECIATION	0.107	True	0.07	0.037	-0.0126119	0.989937
12947	eudicotyledons	SPECIATION	Pentapetalae	SPECIATION	0.076	False	0.095	-0.019	-0.373521	0.70876
12947	eudicotyledons	SPECIATION	Pentapetalae	SPECIATION	0.132	False	0.095	0.037	-0.0126119	0.989937
12947	eudicotyledons	SPECIATION	Pentapetalae	SPECIATION	0.079	False	0.095	-0.016	-0.354187	0.723199
12443	eudicotyledons	SPECIATION	Pentapetalae	SPECIATION	0.039	False	0.069	-0.03	-0.444414	0.656743
48078	eudicotyledons	SPECIATION	Pentapetalae	SPECIATION	0.056	False	0.057	-0.001	-0.257515	0.796781
23112	eudicotyledons	SPECIATION	Pentapetalae	SPECIATION	0.04	False	0.117	-0.077	-0.74732	0.45487
21402	eudicotyledons	SPECIATION	Pentapetalae	SPECIATION	0.233	False	0.166	0.067	0.180732	0.856578
46323	eudicotyledons	SPECIATION	Pentapetalae	SPECIATION	0.091	False	0.065	0.026	-0.0835048	0.93345
34683	eudicotyledons	SPECIATION	Pentapetalae	SPECIATION	0.438	True	0.18	0.258	1.41169	0.158041
34683	eudicotyledons	SPECIATION	Pentapetalae	SPECIATION	0.118	True	0.18	-0.062	-0.650648	0.515274
43521	eudicotyledons	SPECIATION	Pentapetalae	SPECIATION	0.04	False	0.042	-0.002	-0.26396	0.791811
43521	eudicotyledons	SPECIATION	Pentapetalae	SPECIATION	0.051	False	0.042	0.009	-0.193067	0.846907
21649	eudicotyledons	SPECIATION	Pentapetalae	SPECIATION	0.025	False	0.034	-0.009	-0.309073	0.757266
21649	eudicotyledons	SPECIATION	Pentapetalae	SPECIATION	0.048	False	0.034	0.014	-0.160843	0.872217
21649	eudicotyledons	SPECIATION	Pentapetalae	SPECIATION	0.044	False	0.034	0.01	-0.186622	0.851957
21649	eudicotyledons	SPECIATION	Pentapetalae	SPECIATION	0.005	False	0.034	-0.029	-0.437969	0.661408
21649	eudicotyledons	SPECIATION	Pentapetalae	SPECIATION	0.01	False	0.034	-0.024	-0.405745	0.68493
21649	eudicotyledons	SPECIATION	Pentapetalae	SPECIATION	0.016	False	0.034	-0.018	-0.367077	0.713562
21649	eudicotyledons	SPECIATION	Pentapetalae	SPECIATION	0.016	False	0.034	-0.018	-0.367077	0.713562
21649	eudicotyledons	SPECIATION	Pentapetalae	SPECIATION	0.027	False	0.034	-0.007	-0.296184	0.76709
21649	eudicotyledons	SPECIATION	Pentapetalae	SPECIATION	0.024	False	0.034	-0.01	-0.315518	0.752368
21649	eudicotyledons	SPECIATION	Pentapetalae	SPECIATION	0.04	False	0.034	0.006	-0.212401	0.831794
21649	eudicotyledons	SPECIATION	Pentapetalae	SPECIATION	0.123	True	0.034	0.089	0.322518	0.74706
21649	eudicotyledons	SPECIATION	Pentapetalae	SPECIATION	0.074	True	0.034	0.04	0.00672256	0.994636
21649	eudicotyledons	SPECIATION	Pentapetalae	SPECIATION	0.022	False	0.034	-0.012	-0.328408	0.742603
21649	eudicotyledons	SPECIATION	Pentapetalae	SPECIATION	0.078	False	0.034	0.044	0.0325018	0.974072
21649	eudicotyledons	SPECIATION	Pentapetalae	SPECIATION	0.024	False	0.034	-0.01	-0.315518	0.752368
20863	eudicotyledons	SPECIATION	Pentapetalae	SPECIATION	0.025	False	0.066	-0.041	-0.515307	0.606338
20863	eudicotyledons	SPECIATION	Pentapetalae	SPECIATION	0.11	False	0.066	0.044	0.0325018	0.974072
20863	eudicotyledons	SPECIATION	Pentapetalae	SPECIATION	0.061	False	0.066	-0.005	-0.283294	0.776951
38546	eudicotyledons	SPECIATION	Pentapetalae	SPECIATION	0.355	True	0.142	0.213	1.12168	0.262001
38546	eudicotyledons	SPECIATION	Pentapetalae	SPECIATION	0.421	True	0.142	0.279	1.54703	0.121855
46649	eudicotyledons	SPECIATION	Pentapetalae	SPECIATION	0.118	False	0.068	0.05	0.0711707	0.943262
46649	eudicotyledons	SPECIATION	Pentapetalae	SPECIATION	0.045	False	0.068	-0.023	-0.399301	0.689672
31221	eudicotyledons	SPECIATION	Pentapetalae	SPECIATION	0.022	False	0.093	-0.071	-0.708652	0.478541
31221	eudicotyledons	SPECIATION	Pentapetalae	SPECIATION	0.083	False	0.093	-0.01	-0.315518	0.752368
31221	eudicotyledons	SPECIATION	Pentapetalae	SPECIATION	0.061	False	0.093	-0.032	-0.457304	0.647453
31221	eudicotyledons	SPECIATION	Pentapetalae	SPECIATION	0.181	False	0.093	0.088	0.316074	0.751947
31221	eudicotyledons	SPECIATION	Pentapetalae	SPECIATION	0.025	False	0.093	-0.068	-0.689317	0.490624
31221	eudicotyledons	SPECIATION	Pentapetalae	SPECIATION	0.054	False	0.093	-0.039	-0.502418	0.615374
31221	eudicotyledons	SPECIATION	Pentapetalae	SPECIATION	0.09	False	0.093	-0.003	-0.270404	0.786849
31221	eudicotyledons	SPECIATION	Pentapetalae	SPECIATION	0.159	True	0.093	0.066	0.174288	0.861639
31221	eudicotyledons	SPECIATION	Pentapetalae	SPECIATION	0.123	True	0.093	0.03	-0.0577256	0.953967
31221	eudicotyledons	SPECIATION	Pentapetalae	SPECIATION	0.147	True	0.093	0.054	0.0969499	0.922766
31221	eudicotyledons	SPECIATION	Pentapetalae	SPECIATION	0.015	False	0.093	-0.078	-0.753765	0.45099
31221	eudicotyledons	SPECIATION	Pentapetalae	SPECIATION	0.039	False	0.093	-0.054	-0.59909	0.549113
31221	eudicotyledons	SPECIATION	Pentapetalae	SPECIATION	0.014	False	0.093	-0.079	-0.76021	0.447129
31221	eudicotyledons	SPECIATION	Pentapetalae	SPECIATION	0.081	True	0.093	-0.012	-0.328408	0.742603
31221	eudicotyledons	SPECIATION	Pentapetalae	SPECIATION	0.043	True	0.093	-0.05	-0.573311	0.566434
31221	eudicotyledons	SPECIATION	Pentapetalae	SPECIATION	0.208	True	0.093	0.115	0.490083	0.624075
31221	eudicotyledons	SPECIATION	Pentapetalae	SPECIATION	0.186	True	0.093	0.093	0.348298	0.727617
31221	eudicotyledons	SPECIATION	Pentapetalae	SPECIATION	0.337	True	0.093	0.244	1.32146	0.186347
31221	eudicotyledons	SPECIATION	Pentapetalae	SPECIATION	0.099	True	0.093	0.006	-0.212401	0.831794
19853	eudicotyledons	SPECIATION	Pentapetalae	SPECIATION	0.097	False	0.08	0.017	-0.141508	0.887469
34970	eudicotyledons	SPECIATION	Pentapetalae	SPECIATION	0.152	False	0.125	0.027	-0.07706	0.938576
34970	eudicotyledons	SPECIATION	Pentapetalae	SPECIATION	0.204	False	0.125	0.079	0.25807	0.796353
11405	eudicotyledons	SPECIATION	Pentapetalae	SPECIATION	0.023	False	0.034	-0.011	-0.321963	0.747481
11405	eudicotyledons	SPECIATION	Pentapetalae	SPECIATION	0.027	False	0.034	-0.007	-0.296184	0.76709
11405	eudicotyledons	SPECIATION	Pentapetalae	SPECIATION	0.06	False	0.034	0.026	-0.0835048	0.93345
43668	eudicotyledons	SPECIATION	Pentapetalae	SPECIATION	0.085	False	0.065	0.02	-0.122174	0.902761
36374	eudicotyledons	SPECIATION	Pentapetalae	SPECIATION	0.19	False	0.209	-0.019	-0.373521	0.70876
10168	eudicotyledons	SPECIATION	Pentapetalae	SPECIATION	0.294	True	0.073	0.221	1.17323	0.240702
10168	eudicotyledons	SPECIATION	Pentapetalae	SPECIATION	0.279	True	0.073	0.206	1.07656	0.281676
10168	eudicotyledons	SPECIATION	Pentapetalae	SPECIATION	0.233	True	0.073	0.16	0.7801	0.435332
10168	eudicotyledons	SPECIATION	Pentapetalae	SPECIATION	0.181	True	0.073	0.108	0.44497	0.656342
10168	eudicotyledons	SPECIATION	Pentapetalae	SPECIATION	0.272	True	0.073	0.199	1.03145	0.302331
10168	eudicotyledons	SPECIATION	Pentapetalae	SPECIATION	0.275	True	0.073	0.202	1.05078	0.293359
10168	eudicotyledons	SPECIATION	Pentapetalae	SPECIATION	0.156	True	0.073	0.083	0.283849	0.776526
10168	eudicotyledons	SPECIATION	Pentapetalae	SPECIATION	0.075	False	0.073	0.002	-0.23818	0.811741
10168	eudicotyledons	SPECIATION	Pentapetalae	SPECIATION	0.061	False	0.073	-0.012	-0.328408	0.742603
10168	eudicotyledons	SPECIATION	Pentapetalae	SPECIATION	0.115	True	0.073	0.042	0.0196122	0.984353
10168	eudicotyledons	SPECIATION	Pentapetalae	SPECIATION	0.186	True	0.073	0.113	0.477194	0.633224
10168	eudicotyledons	SPECIATION	Pentapetalae	SPECIATION	0.147	False	0.073	0.074	0.225846	0.821321
10168	eudicotyledons	SPECIATION	Pentapetalae	SPECIATION	0.067	False	0.073	-0.006	-0.289739	0.772016
10168	eudicotyledons	SPECIATION	Pentapetalae	SPECIATION	0.055	False	0.073	-0.018	-0.367077	0.713562
22930	eudicotyledons	SPECIATION	Pentapetalae	SPECIATION	0.034	False	0.128	-0.094	-0.856882	0.39151
22930	eudicotyledons	SPECIATION	Pentapetalae	SPECIATION	0.075	False	0.128	-0.053	-0.592645	0.553419
22930	eudicotyledons	SPECIATION	Pentapetalae	SPECIATION	0.029	False	0.128	-0.099	-0.889106	0.373946
22930	eudicotyledons	SPECIATION	Pentapetalae	SPECIATION	0.229	False	0.128	0.101	0.399856	0.689263
22930	eudicotyledons	SPECIATION	Pentapetalae	SPECIATION	0.069	False	0.128	-0.059	-0.631314	0.527835
22930	eudicotyledons	SPECIATION	Pentapetalae	SPECIATION	0.266	False	0.128	0.138	0.638314	0.523269
22930	eudicotyledons	SPECIATION	Pentapetalae	SPECIATION	0.183	False	0.128	0.055	0.103395	0.91765
22930	eudicotyledons	SPECIATION	Pentapetalae	SPECIATION	0.045	False	0.128	-0.083	-0.785989	0.431874
22930	eudicotyledons	SPECIATION	Pentapetalae	SPECIATION	0.195	False	0.128	0.067	0.180732	0.856578
22930	eudicotyledons	SPECIATION	Pentapetalae	SPECIATION	0.083	False	0.128	-0.045	-0.541086	0.588448
22930	eudicotyledons	SPECIATION	Pentapetalae	SPECIATION	0.08	True	0.128	-0.048	-0.560421	0.575192
22930	eudicotyledons	SPECIATION	Pentapetalae	SPECIATION	0.069	True	0.128	-0.059	-0.631314	0.527835
47485	eudicotyledons	SPECIATION	Pentapetalae	SPECIATION	0.036	False	0.047	-0.011	-0.321963	0.747481
10677	eudicotyledons	SPECIATION	Pentapetalae	SPECIATION	0.131	True	0.104	0.027	-0.07706	0.938576
10677	eudicotyledons	SPECIATION	Pentapetalae	SPECIATION	0.095	True	0.104	-0.009	-0.309073	0.757266
34669	eudicotyledons	SPECIATION	Pentapetalae	SPECIATION	0.101	False	0.102	-0.001	-0.257515	0.796781
34669	eudicotyledons	SPECIATION	Pentapetalae	SPECIATION	0.088	False	0.102	-0.014	-0.341297	0.73288
47468	eudicotyledons	SPECIATION	Pentapetalae	SPECIATION	0.049	False	0.074	-0.025	-0.41219	0.6802
45714	eudicotyledons	SPECIATION	Pentapetalae	SPECIATION	0.022	False	0.057	-0.035	-0.476638	0.63362
45714	eudicotyledons	SPECIATION	Pentapetalae	SPECIATION	0.062	False	0.057	0.005	-0.218846	0.82677
45714	eudicotyledons	SPECIATION	Pentapetalae	SPECIATION	0.124	False	0.057	0.067	0.180732	0.856578
45714	eudicotyledons	SPECIATION	Pentapetalae	SPECIATION	0.064	True	0.057	0.007	-0.205956	0.836825
45714	eudicotyledons	SPECIATION	Pentapetalae	SPECIATION	0.055	True	0.057	-0.002	-0.26396	0.791811
45714	eudicotyledons	SPECIATION	Pentapetalae	SPECIATION	0.032	False	0.057	-0.025	-0.41219	0.6802
45714	eudicotyledons	SPECIATION	Pentapetalae	SPECIATION	0.147	True	0.057	0.09	0.328963	0.742184
45714	eudicotyledons	SPECIATION	Pentapetalae	SPECIATION	0.096	True	0.057	0.039	0.000277753	0.999778
45714	eudicotyledons	SPECIATION	Pentapetalae	SPECIATION	0.07	True	0.057	0.013	-0.167287	0.867144
45714	eudicotyledons	SPECIATION	Pentapetalae	SPECIATION	0.038	True	0.057	-0.019	-0.373521	0.70876
31499	eudicotyledons	SPECIATION	Pentapetalae	SPECIATION	0.096	False	0.092	0.004	-0.225291	0.821753
31499	eudicotyledons	SPECIATION	Pentapetalae	SPECIATION	0.051	False	0.092	-0.041	-0.515307	0.606338
31499	eudicotyledons	SPECIATION	Pentapetalae	SPECIATION	0.128	False	0.092	0.036	-0.0190567	0.984796
31499	eudicotyledons	SPECIATION	Pentapetalae	SPECIATION	0.037	False	0.092	-0.055	-0.605535	0.544824
31499	eudicotyledons	SPECIATION	Pentapetalae	SPECIATION	0.078	False	0.092	-0.014	-0.341297	0.73288
31499	eudicotyledons	SPECIATION	Pentapetalae	SPECIATION	0.032	False	0.092	-0.06	-0.637759	0.523631
23147	eudicotyledons	SPECIATION	Pentapetalae	SPECIATION	1.675	True	0.073	1.602	10.0735	0
23147	eudicotyledons	SPECIATION	Pentapetalae	SPECIATION	1.625	True	0.073	1.552	9.75128	0
23147	eudicotyledons	SPECIATION	Pentapetalae	SPECIATION	1.166	True	0.073	1.093	6.79311	1.09741e-11
23147	eudicotyledons	SPECIATION	Pentapetalae	SPECIATION	0.085	True	0.073	0.012	-0.173732	0.862076
23147	eudicotyledons	SPECIATION	Pentapetalae	SPECIATION	0.293	True	0.073	0.22	1.16679	0.243296
23147	eudicotyledons	SPECIATION	Pentapetalae	SPECIATION	0.062	True	0.073	-0.011	-0.321963	0.747481
23147	eudicotyledons	SPECIATION	Pentapetalae	SPECIATION	0.072	False	0.073	-0.001	-0.257515	0.796781
23147	eudicotyledons	SPECIATION	Pentapetalae	SPECIATION	0.073	True	0.073	0	-0.25107	0.80176
23147	eudicotyledons	SPECIATION	Pentapetalae	SPECIATION	0.088	True	0.073	0.015	-0.154398	0.877296
23147	eudicotyledons	SPECIATION	Pentapetalae	SPECIATION	0.044	True	0.073	-0.029	-0.437969	0.661408
23147	eudicotyledons	SPECIATION	Pentapetalae	SPECIATION	1.161	True	0.073	1.088	6.76089	1.3715e-11
23147	eudicotyledons	SPECIATION	Pentapetalae	SPECIATION	0.073	True	0.073	0	-0.25107	0.80176
23147	eudicotyledons	SPECIATION	Pentapetalae	SPECIATION	0.041	False	0.073	-0.032	-0.457304	0.647453
23147	eudicotyledons	SPECIATION	Pentapetalae	SPECIATION	0.055	False	0.073	-0.018	-0.367077	0.713562
23147	eudicotyledons	SPECIATION	Pentapetalae	SPECIATION	0.786	True	0.073	0.713	4.34408	1.3986e-05
23147	eudicotyledons	SPECIATION	Pentapetalae	SPECIATION	0.178	True	0.073	0.105	0.425635	0.670374
23147	eudicotyledons	SPECIATION	Pentapetalae	SPECIATION	0.157	True	0.073	0.084	0.290294	0.771591
23147	eudicotyledons	SPECIATION	Pentapetalae	SPECIATION	0.013	True	0.073	-0.06	-0.637759	0.523631
23147	eudicotyledons	SPECIATION	Pentapetalae	SPECIATION	1.027	True	0.073	0.954	5.89728	3.69541e-09
23147	eudicotyledons	SPECIATION	Pentapetalae	SPECIATION	0.152	True	0.073	0.079	0.25807	0.796353
23147	eudicotyledons	SPECIATION	Pentapetalae	SPECIATION	0.087	True	0.073	0.014	-0.160843	0.872217
23147	eudicotyledons	SPECIATION	Pentapetalae	SPECIATION	0.062	True	0.073	-0.011	-0.321963	0.747481
23147	eudicotyledons	SPECIATION	Pentapetalae	SPECIATION	0.036	False	0.073	-0.037	-0.489528	0.624468
23147	eudicotyledons	SPECIATION	Pentapetalae	SPECIATION	0.025	False	0.073	-0.048	-0.560421	0.575192
37252	eudicotyledons	SPECIATION	Pentapetalae	SPECIATION	0.169	False	0.213	-0.044	-0.534642	0.592898
13509	eudicotyledons	SPECIATION	Pentapetalae	SPECIATION	0.094	False	0.049	0.045	0.0389466	0.968933
13509	eudicotyledons	SPECIATION	Pentapetalae	SPECIATION	0.028	False	0.049	-0.021	-0.386411	0.699192
12831	eudicotyledons	SPECIATION	Pentapetalae	SPECIATION	0.045	False	0.071	-0.026	-0.418635	0.675483
35126	eudicotyledons	SPECIATION	Pentapetalae	SPECIATION	0.023	False	0.058	-0.035	-0.476638	0.63362
10743	eudicotyledons	SPECIATION	Pentapetalae	SPECIATION	0.074	False	0.054	0.02	-0.122174	0.902761
10743	eudicotyledons	SPECIATION	Pentapetalae	SPECIATION	0.175	True	0.054	0.121	0.528752	0.596977
10743	eudicotyledons	SPECIATION	Pentapetalae	SPECIATION	0.119	True	0.054	0.065	0.167843	0.866707
12604	eudicotyledons	SPECIATION	Pentapetalae	SPECIATION	0.081	False	0.102	-0.021	-0.386411	0.699192
12604	eudicotyledons	SPECIATION	Pentapetalae	SPECIATION	0.066	False	0.102	-0.036	-0.483083	0.629037
12497	eudicotyledons	SPECIATION	Pentapetalae	SPECIATION	0.096	False	0.077	0.019	-0.128618	0.89766
12497	eudicotyledons	SPECIATION	Pentapetalae	SPECIATION	0.086	False	0.077	0.009	-0.193067	0.846907
12341	eudicotyledons	SPECIATION	Pentapetalae	SPECIATION	0.09	False	0.082	0.008	-0.199511	0.841863
12341	eudicotyledons	SPECIATION	Pentapetalae	SPECIATION	0.292	True	0.082	0.21	1.10234	0.270314
12341	eudicotyledons	SPECIATION	Pentapetalae	SPECIATION	0.064	True	0.082	-0.018	-0.367077	0.713562
10768	eudicotyledons	SPECIATION	Pentapetalae	SPECIATION	0.104	True	0.036	0.068	0.187177	0.851522
10768	eudicotyledons	SPECIATION	Pentapetalae	SPECIATION	0.104	True	0.036	0.068	0.187177	0.851522
10768	eudicotyledons	SPECIATION	Pentapetalae	SPECIATION	0.069	True	0.036	0.033	-0.0383911	0.969376
10768	eudicotyledons	SPECIATION	Pentapetalae	SPECIATION	0.081	True	0.036	0.045	0.0389466	0.968933
34536	eudicotyledons	SPECIATION	Pentapetalae	SPECIATION	0.352	False	0.319	0.033	-0.0383911	0.969376
34536	eudicotyledons	SPECIATION	Pentapetalae	SPECIATION	0.221	False	0.319	-0.098	-0.882661	0.377419
14152	eudicotyledons	SPECIATION	Pentapetalae	SPECIATION	0.073	False	0.096	-0.023	-0.399301	0.689672
30265	eudicotyledons	SPECIATION	Pentapetalae	SPECIATION	0.076	False	0.071	0.005	-0.218846	0.82677
14359	eudicotyledons	SPECIATION	Pentapetalae	SPECIATION	0.075	False	0.065	0.01	-0.186622	0.851957
28674	eudicotyledons	SPECIATION	Pentapetalae	SPECIATION	0.149	False	0.118	0.031	-0.0512807	0.959102
11741	eudicotyledons	SPECIATION	Pentapetalae	SPECIATION	0.133	False	0.074	0.059	0.129174	0.89722
11741	eudicotyledons	SPECIATION	Pentapetalae	SPECIATION	0.041	False	0.074	-0.033	-0.463749	0.642828
13194	eudicotyledons	SPECIATION	Pentapetalae	SPECIATION	0.036	False	0.076	-0.04	-0.508862	0.610849
13194	eudicotyledons	SPECIATION	Pentapetalae	SPECIATION	0.095	False	0.076	0.019	-0.128618	0.89766
33702	eudicotyledons	SPECIATION	Pentapetalae	SPECIATION	0.426	True	0.215	0.211	1.10879	0.267523
33702	eudicotyledons	SPECIATION	Pentapetalae	SPECIATION	0.215	True	0.215	0	-0.25107	0.80176
33702	eudicotyledons	SPECIATION	Pentapetalae	SPECIATION	0.114	False	0.215	-0.101	-0.901996	0.367059
11129	eudicotyledons	SPECIATION	Pentapetalae	SPECIATION	0.094	False	0.081	0.013	-0.167287	0.867144
11129	eudicotyledons	SPECIATION	Pentapetalae	SPECIATION	0.157	False	0.081	0.076	0.238736	0.81131
11129	eudicotyledons	SPECIATION	Pentapetalae	SPECIATION	0.088	False	0.081	0.007	-0.205956	0.836825
47286	eudicotyledons	SPECIATION	Pentapetalae	SPECIATION	0.249	False	0.222	0.027	-0.07706	0.938576
13468	eudicotyledons	SPECIATION	Pentapetalae	SPECIATION	0.18	False	0.129	0.051	0.0776155	0.938134
13468	eudicotyledons	SPECIATION	Pentapetalae	SPECIATION	0.136	False	0.129	0.007	-0.205956	0.836825
47776	eudicotyledons	SPECIATION	Pentapetalae	SPECIATION	0.209	False	0.174	0.035	-0.0255015	0.979655
24089	eudicotyledons	SPECIATION	Pentapetalae	SPECIATION	0.036	False	0.055	-0.019	-0.373521	0.70876
24089	eudicotyledons	SPECIATION	Pentapetalae	SPECIATION	0.052	False	0.055	-0.003	-0.270404	0.786849
24089	eudicotyledons	SPECIATION	Pentapetalae	SPECIATION	0.023	False	0.055	-0.032	-0.457304	0.647453
24089	eudicotyledons	SPECIATION	Pentapetalae	SPECIATION	0.066	False	0.055	0.011	-0.180177	0.857014
24089	eudicotyledons	SPECIATION	Pentapetalae	SPECIATION	0.061	False	0.055	0.006	-0.212401	0.831794
24089	eudicotyledons	SPECIATION	Pentapetalae	SPECIATION	0.031	True	0.055	-0.024	-0.405745	0.68493
24089	eudicotyledons	SPECIATION	Pentapetalae	SPECIATION	0.031	True	0.055	-0.024	-0.405745	0.68493
24089	eudicotyledons	SPECIATION	Pentapetalae	SPECIATION	0.037	False	0.055	-0.018	-0.367077	0.713562
24089	eudicotyledons	SPECIATION	Pentapetalae	SPECIATION	0.041	False	0.055	-0.014	-0.341297	0.73288
24089	eudicotyledons	SPECIATION	Pentapetalae	SPECIATION	0.023	False	0.055	-0.032	-0.457304	0.647453
24089	eudicotyledons	SPECIATION	Pentapetalae	SPECIATION	0.094	True	0.055	0.039	0.000277753	0.999778
24089	eudicotyledons	SPECIATION	Pentapetalae	SPECIATION	0.08	True	0.055	0.025	-0.0899496	0.928327
21569	eudicotyledons	SPECIATION	Pentapetalae	SPECIATION	0.008	False	0.038	-0.03	-0.444414	0.656743
21569	eudicotyledons	SPECIATION	Pentapetalae	SPECIATION	0.024	False	0.038	-0.014	-0.341297	0.73288
21569	eudicotyledons	SPECIATION	Pentapetalae	SPECIATION	0.039	False	0.038	0.001	-0.244625	0.806747
48191	eudicotyledons	SPECIATION	Pentapetalae	SPECIATION	0.064	False	0.076	-0.012	-0.328408	0.742603
37201	eudicotyledons	SPECIATION	Pentapetalae	SPECIATION	0.147	False	0.126	0.021	-0.115729	0.907867
14552	eudicotyledons	SPECIATION	Pentapetalae	SPECIATION	0.049	False	0.047	0.002	-0.23818	0.811741
14552	eudicotyledons	SPECIATION	Pentapetalae	SPECIATION	0.028	False	0.047	-0.019	-0.373521	0.70876
14552	eudicotyledons	SPECIATION	Pentapetalae	SPECIATION	0.03	False	0.047	-0.017	-0.360632	0.718375
48045	eudicotyledons	SPECIATION	Pentapetalae	SPECIATION	0.291	True	0.163	0.128	0.573866	0.566058
48045	eudicotyledons	SPECIATION	Pentapetalae	SPECIATION	0.124	True	0.163	-0.039	-0.502418	0.615374
13202	eudicotyledons	SPECIATION	Pentapetalae	SPECIATION	0.086	False	0.081	0.005	-0.218846	0.82677
21348	eudicotyledons	SPECIATION	Pentapetalae	SPECIATION	0.059	False	0.059	0	-0.25107	0.80176
43657	eudicotyledons	SPECIATION	Pentapetalae	SPECIATION	0.076	False	0.061	0.015	-0.154398	0.877296
11774	eudicotyledons	SPECIATION	Pentapetalae	SPECIATION	0.061	False	0.054	0.007	-0.205956	0.836825
11774	eudicotyledons	SPECIATION	Pentapetalae	SPECIATION	0.029	False	0.054	-0.025	-0.41219	0.6802
11774	eudicotyledons	SPECIATION	Pentapetalae	SPECIATION	0.078	False	0.054	0.024	-0.0963944	0.923207
19918	eudicotyledons	SPECIATION	Pentapetalae	SPECIATION	0.03	False	0.06	-0.03	-0.444414	0.656743
19918	eudicotyledons	SPECIATION	Pentapetalae	SPECIATION	0.03	False	0.06	-0.03	-0.444414	0.656743
19918	eudicotyledons	SPECIATION	Pentapetalae	SPECIATION	0.137	False	0.06	0.077	0.245181	0.806317
19918	eudicotyledons	SPECIATION	Pentapetalae	SPECIATION	0.003	False	0.06	-0.057	-0.618424	0.536296
43752	eudicotyledons	SPECIATION	Pentapetalae	SPECIATION	0.066	False	0.065	0.001	-0.244625	0.806747
36722	eudicotyledons	SPECIATION	Pentapetalae	SPECIATION	0.223	False	0.161	0.062	0.148508	0.881942
12203	eudicotyledons	SPECIATION	Pentapetalae	SPECIATION	0.176	False	0.114	0.062	0.148508	0.881942
12203	eudicotyledons	SPECIATION	Pentapetalae	SPECIATION	0.01	False	0.114	-0.104	-0.92133	0.356878
12203	eudicotyledons	SPECIATION	Pentapetalae	SPECIATION	0.148	False	0.114	0.034	-0.0319463	0.974515
12663	eudicotyledons	SPECIATION	Pentapetalae	SPECIATION	0.38	True	0.149	0.231	1.23768	0.215834
12663	eudicotyledons	SPECIATION	Pentapetalae	SPECIATION	0.099	True	0.149	-0.05	-0.573311	0.566434
12663	eudicotyledons	SPECIATION	Pentapetalae	SPECIATION	0.18	False	0.149	0.031	-0.0512807	0.959102
12663	eudicotyledons	SPECIATION	Pentapetalae	SPECIATION	0.081	False	0.149	-0.068	-0.689317	0.490624
31811	eudicotyledons	SPECIATION	Pentapetalae	SPECIATION	0.045	False	0.082	-0.037	-0.489528	0.624468
31064	eudicotyledons	SPECIATION	Pentapetalae	SPECIATION	0.043	False	0.124	-0.081	-0.7731	0.439463
34676	eudicotyledons	SPECIATION	Pentapetalae	SPECIATION	0.089	False	0.303	-0.214	-1.63026	0.103047
11804	eudicotyledons	SPECIATION	Pentapetalae	SPECIATION	0.077	False	0.07	0.007	-0.205956	0.836825
11804	eudicotyledons	SPECIATION	Pentapetalae	SPECIATION	0.024	False	0.07	-0.046	-0.547531	0.584014
11804	eudicotyledons	SPECIATION	Pentapetalae	SPECIATION	0.121	False	0.07	0.051	0.0776155	0.938134
47933	eudicotyledons	SPECIATION	Pentapetalae	SPECIATION	0.256	False	0.162	0.094	0.354742	0.722783
47933	eudicotyledons	SPECIATION	Pentapetalae	SPECIATION	0.176	False	0.162	0.014	-0.160843	0.872217
47933	eudicotyledons	SPECIATION	Pentapetalae	SPECIATION	0.218	False	0.162	0.056	0.10984	0.912537
47933	eudicotyledons	SPECIATION	Pentapetalae	SPECIATION	0.124	False	0.162	-0.038	-0.495973	0.619914
47933	eudicotyledons	SPECIATION	Pentapetalae	SPECIATION	0.16	False	0.162	-0.002	-0.26396	0.791811
47933	eudicotyledons	SPECIATION	Pentapetalae	SPECIATION	0.096	False	0.162	-0.066	-0.676427	0.498769
47933	eudicotyledons	SPECIATION	Pentapetalae	SPECIATION	0.166	False	0.162	0.004	-0.225291	0.821753
47933	eudicotyledons	SPECIATION	Pentapetalae	SPECIATION	0.198	False	0.162	0.036	-0.0190567	0.984796
47933	eudicotyledons	SPECIATION	Pentapetalae	SPECIATION	0.201	False	0.162	0.039	0.000277753	0.999778
47933	eudicotyledons	SPECIATION	Pentapetalae	SPECIATION	0.898	False	0.162	0.736	4.49231	7.04542e-06
47933	eudicotyledons	SPECIATION	Pentapetalae	SPECIATION	0.222	False	0.162	0.06	0.135619	0.892123
47933	eudicotyledons	SPECIATION	Pentapetalae	SPECIATION	1.267	True	0.162	1.105	6.87045	6.39999e-12
47933	eudicotyledons	SPECIATION	Pentapetalae	SPECIATION	0.939	True	0.162	0.777	4.75655	1.96931e-06
47933	eudicotyledons	SPECIATION	Pentapetalae	SPECIATION	0.993	True	0.162	0.831	5.10457	3.3155e-07
32440	eudicotyledons	SPECIATION	Pentapetalae	SPECIATION	0.082	False	0.08	0.002	-0.23818	0.811741
32440	eudicotyledons	SPECIATION	Pentapetalae	SPECIATION	0.081	False	0.08	0.001	-0.244625	0.806747
32440	eudicotyledons	SPECIATION	Pentapetalae	SPECIATION	0.051	False	0.08	-0.029	-0.437969	0.661408
11935	eudicotyledons	SPECIATION	Pentapetalae	SPECIATION	0.03	False	0.064	-0.034	-0.470194	0.638217
11935	eudicotyledons	SPECIATION	Pentapetalae	SPECIATION	0.035	False	0.064	-0.029	-0.437969	0.661408
23195	eudicotyledons	SPECIATION	Pentapetalae	SPECIATION	0.064	False	0.087	-0.023	-0.399301	0.689672
36712	eudicotyledons	SPECIATION	Pentapetalae	SPECIATION	0.07	False	0.053	0.017	-0.141508	0.887469
43707	eudicotyledons	SPECIATION	Pentapetalae	SPECIATION	0.044	False	0.076	-0.032	-0.457304	0.647453
47725	eudicotyledons	SPECIATION	Pentapetalae	SPECIATION	0.067	False	0.067	0	-0.25107	0.80176
47275	eudicotyledons	SPECIATION	Pentapetalae	SPECIATION	0.031	False	0.05	-0.019	-0.373521	0.70876
47826	eudicotyledons	SPECIATION	Pentapetalae	SPECIATION	0.075	False	0.103	-0.028	-0.431525	0.666087
42851	eudicotyledons	SPECIATION	Pentapetalae	SPECIATION	0.336	False	0.208	0.128	0.573866	0.566058
42851	eudicotyledons	SPECIATION	Pentapetalae	SPECIATION	0.449	True	0.208	0.241	1.30213	0.192872
42851	eudicotyledons	SPECIATION	Pentapetalae	SPECIATION	0.347	True	0.208	0.139	0.644759	0.519083
42851	eudicotyledons	SPECIATION	Pentapetalae	SPECIATION	0.07	False	0.208	-0.138	-1.14045	0.254097
14494	eudicotyledons	SPECIATION	Pentapetalae	SPECIATION	0.089	False	0.093	-0.004	-0.276849	0.781896
47479	eudicotyledons	SPECIATION	Pentapetalae	SPECIATION	0.084	False	0.099	-0.015	-0.347742	0.728034
32086	eudicotyledons	SPECIATION	Pentapetalae	SPECIATION	0.143	False	0.114	0.029	-0.0641704	0.948835
13471	eudicotyledons	SPECIATION	Pentapetalae	SPECIATION	0.135	False	0.125	0.01	-0.186622	0.851957
23131	eudicotyledons	SPECIATION	Pentapetalae	SPECIATION	0.097	False	0.075	0.022	-0.109284	0.912977
32093	eudicotyledons	SPECIATION	Pentapetalae	SPECIATION	0.126	False	0.102	0.024	-0.0963944	0.923207
32093	eudicotyledons	SPECIATION	Pentapetalae	SPECIATION	0.251	True	0.102	0.149	0.709207	0.478196
32093	eudicotyledons	SPECIATION	Pentapetalae	SPECIATION	0.197	True	0.102	0.095	0.361187	0.717959
32093	eudicotyledons	SPECIATION	Pentapetalae	SPECIATION	0.242	True	0.102	0.14	0.651204	0.514915
32093	eudicotyledons	SPECIATION	Pentapetalae	SPECIATION	0.193	True	0.102	0.091	0.335408	0.737317
32093	eudicotyledons	SPECIATION	Pentapetalae	SPECIATION	0.08	False	0.102	-0.022	-0.392856	0.694426
32093	eudicotyledons	SPECIATION	Pentapetalae	SPECIATION	0.087	False	0.102	-0.015	-0.347742	0.728034
32093	eudicotyledons	SPECIATION	Pentapetalae	SPECIATION	0.095	False	0.102	-0.007	-0.296184	0.76709
32093	eudicotyledons	SPECIATION	Pentapetalae	SPECIATION	0.044	False	0.102	-0.058	-0.624869	0.532057
32093	eudicotyledons	SPECIATION	Pentapetalae	SPECIATION	0.046	False	0.102	-0.056	-0.611979	0.540551
47602	eudicotyledons	SPECIATION	Pentapetalae	SPECIATION	0.18	False	0.187	-0.007	-0.296184	0.76709
47071	eudicotyledons	SPECIATION	Pentapetalae	SPECIATION	0.56	True	0.251	0.309	1.74038	0.0817928
47071	eudicotyledons	SPECIATION	Pentapetalae	SPECIATION	0.425	True	0.251	0.174	0.870327	0.384122
24095	eudicotyledons	SPECIATION	Pentapetalae	SPECIATION	0.03	False	0.046	-0.016	-0.354187	0.723199
48268	eudicotyledons	SPECIATION	Pentapetalae	SPECIATION	0.321	False	0.198	0.123	0.541642	0.588065
11759	eudicotyledons	SPECIATION	Pentapetalae	SPECIATION	0.009	False	0.039	-0.03	-0.444414	0.656743
11759	eudicotyledons	SPECIATION	Pentapetalae	SPECIATION	0.018	False	0.039	-0.021	-0.386411	0.699192
36359	eudicotyledons	SPECIATION	Pentapetalae	SPECIATION	0.101	False	0.086	0.015	-0.154398	0.877296
36805	eudicotyledons	SPECIATION	Pentapetalae	SPECIATION	0.206	False	0.242	-0.036	-0.483083	0.629037
43113	eudicotyledons	SPECIATION	Pentapetalae	SPECIATION	0.053	False	0.03	0.023	-0.102839	0.918091
12233	eudicotyledons	SPECIATION	Pentapetalae	SPECIATION	0.079	True	0.053	0.026	-0.0835048	0.93345
12233	eudicotyledons	SPECIATION	Pentapetalae	SPECIATION	0.092	False	0.053	0.039	0.000277753	0.999778
31311	eudicotyledons	SPECIATION	Pentapetalae	SPECIATION	0.003	False	0.083	-0.08	-0.766655	0.443287
31311	eudicotyledons	SPECIATION	Pentapetalae	SPECIATION	0.074	False	0.083	-0.009	-0.309073	0.757266
31311	eudicotyledons	SPECIATION	Pentapetalae	SPECIATION	0.02	False	0.083	-0.063	-0.657093	0.511121
33527	eudicotyledons	SPECIATION	Pentapetalae	SPECIATION	0.369	True	0.228	0.141	0.657649	0.510764
33527	eudicotyledons	SPECIATION	Pentapetalae	SPECIATION	0.359	True	0.228	0.131	0.5932	0.553047
33527	eudicotyledons	SPECIATION	Pentapetalae	SPECIATION	0.278	False	0.228	0.05	0.0711707	0.943262
43238	eudicotyledons	SPECIATION	Pentapetalae	SPECIATION	0.042	False	0.043	-0.001	-0.257515	0.796781
24326	eudicotyledons	SPECIATION	Pentapetalae	SPECIATION	0.093	True	0.088	0.005	-0.218846	0.82677
24326	eudicotyledons	SPECIATION	Pentapetalae	SPECIATION	0.03	True	0.088	-0.058	-0.624869	0.532057
24326	eudicotyledons	SPECIATION	Pentapetalae	SPECIATION	0	False	0.088	-0.088	-0.818213	0.413235
24326	eudicotyledons	SPECIATION	Pentapetalae	SPECIATION	0.053	False	0.088	-0.035	-0.476638	0.63362
24326	eudicotyledons	SPECIATION	Pentapetalae	SPECIATION	0.009	False	0.088	-0.079	-0.76021	0.447129
24326	eudicotyledons	SPECIATION	Pentapetalae	SPECIATION	0.163	False	0.088	0.075	0.232291	0.816312
24326	eudicotyledons	SPECIATION	Pentapetalae	SPECIATION	0.265	True	0.088	0.177	0.889662	0.373648
24326	eudicotyledons	SPECIATION	Pentapetalae	SPECIATION	0.089	True	0.088	0.001	-0.244625	0.806747
24326	eudicotyledons	SPECIATION	Pentapetalae	SPECIATION	0.265	True	0.088	0.177	0.889662	0.373648
24326	eudicotyledons	SPECIATION	Pentapetalae	SPECIATION	0.193	True	0.088	0.105	0.425635	0.670374
24326	eudicotyledons	SPECIATION	Pentapetalae	SPECIATION	0.052	False	0.088	-0.036	-0.483083	0.629037
34959	eudicotyledons	SPECIATION	Pentapetalae	SPECIATION	0.435	True	0.181	0.254	1.38591	0.165774
34959	eudicotyledons	SPECIATION	Pentapetalae	SPECIATION	0.183	True	0.181	0.002	-0.23818	0.811741
10739	eudicotyledons	SPECIATION	Pentapetalae	SPECIATION	0.062	False	0.044	0.018	-0.135063	0.892562
33927	eudicotyledons	SPECIATION	Pentapetalae	SPECIATION	0.08	False	0.096	-0.016	-0.354187	0.723199
33831	eudicotyledons	SPECIATION	Pentapetalae	SPECIATION	0.26	True	0.091	0.169	0.838103	0.401973
33831	eudicotyledons	SPECIATION	Pentapetalae	SPECIATION	0.233	True	0.091	0.142	0.664093	0.506631
33831	eudicotyledons	SPECIATION	Pentapetalae	SPECIATION	0.105	False	0.091	0.014	-0.160843	0.872217
10885	eudicotyledons	SPECIATION	Pentapetalae	SPECIATION	0.022	False	0.058	-0.036	-0.483083	0.629037
38390	eudicotyledons	SPECIATION	Pentapetalae	SPECIATION	0.171	False	0.131	0.04	0.00672256	0.994636
11679	eudicotyledons	SPECIATION	Pentapetalae	SPECIATION	0.031	False	0.066	-0.035	-0.476638	0.63362
11679	eudicotyledons	SPECIATION	Pentapetalae	SPECIATION	0.114	False	0.066	0.048	0.0582811	0.953525
11679	eudicotyledons	SPECIATION	Pentapetalae	SPECIATION	0.036	False	0.066	-0.03	-0.444414	0.656743
11679	eudicotyledons	SPECIATION	Pentapetalae	SPECIATION	0.038	False	0.066	-0.028	-0.431525	0.666087
11679	eudicotyledons	SPECIATION	Pentapetalae	SPECIATION	0.139	False	0.066	0.073	0.219401	0.826337
11679	eudicotyledons	SPECIATION	Pentapetalae	SPECIATION	0.057	False	0.066	-0.009	-0.309073	0.757266
33391	eudicotyledons	SPECIATION	Pentapetalae	SPECIATION	0	False	0.033	-0.033	-0.463749	0.642828
33391	eudicotyledons	SPECIATION	Pentapetalae	SPECIATION	0	False	0.033	-0.033	-0.463749	0.642828
13114	eudicotyledons	SPECIATION	Pentapetalae	SPECIATION	0.136	False	0.108	0.028	-0.0706152	0.943704
37720	eudicotyledons	SPECIATION	Pentapetalae	SPECIATION	0.1	False	0.103	-0.003	-0.270404	0.786849
43039	eudicotyledons	SPECIATION	Pentapetalae	SPECIATION	0.065	False	0.099	-0.034	-0.470194	0.638217
43039	eudicotyledons	SPECIATION	Pentapetalae	SPECIATION	0.02	False	0.099	-0.079	-0.76021	0.447129
43039	eudicotyledons	SPECIATION	Pentapetalae	SPECIATION	0.046	False	0.099	-0.053	-0.592645	0.553419
13296	eudicotyledons	SPECIATION	Pentapetalae	SPECIATION	0.127	False	0.079	0.048	0.0582811	0.953525
43539	eudicotyledons	SPECIATION	Pentapetalae	SPECIATION	0.078	False	0.092	-0.014	-0.341297	0.73288
43539	eudicotyledons	SPECIATION	Pentapetalae	SPECIATION	0.254	True	0.092	0.162	0.79299	0.427784
43539	eudicotyledons	SPECIATION	Pentapetalae	SPECIATION	0.233	True	0.092	0.141	0.657649	0.510764
43539	eudicotyledons	SPECIATION	Pentapetalae	SPECIATION	0.132	True	0.092	0.04	0.00672256	0.994636
43539	eudicotyledons	SPECIATION	Pentapetalae	SPECIATION	0.052	True	0.092	-0.04	-0.508862	0.610849
43539	eudicotyledons	SPECIATION	Pentapetalae	SPECIATION	0.079	False	0.092	-0.013	-0.334852	0.737736
43539	eudicotyledons	SPECIATION	Pentapetalae	SPECIATION	0.123	True	0.092	0.031	-0.0512807	0.959102
43539	eudicotyledons	SPECIATION	Pentapetalae	SPECIATION	0.098	True	0.092	0.006	-0.212401	0.831794
43539	eudicotyledons	SPECIATION	Pentapetalae	SPECIATION	0.085	False	0.092	-0.007	-0.296184	0.76709
33374	eudicotyledons	SPECIATION	Pentapetalae	SPECIATION	0.06	False	0.117	-0.057	-0.618424	0.536296
31269	eudicotyledons	SPECIATION	Pentapetalae	SPECIATION	0.048	False	0.084	-0.036	-0.483083	0.629037
31269	eudicotyledons	SPECIATION	Pentapetalae	SPECIATION	0.15	True	0.084	0.066	0.174288	0.861639
31269	eudicotyledons	SPECIATION	Pentapetalae	SPECIATION	0.156	True	0.084	0.072	0.212957	0.831361
31269	eudicotyledons	SPECIATION	Pentapetalae	SPECIATION	0.061	False	0.084	-0.023	-0.399301	0.689672
15082	eudicotyledons	SPECIATION	Pentapetalae	SPECIATION	0.1	False	0.081	0.019	-0.128618	0.89766
12922	eudicotyledons	SPECIATION	Pentapetalae	SPECIATION	0.052	False	0.058	-0.006	-0.289739	0.772016
10048	eudicotyledons	SPECIATION	Pentapetalae	SPECIATION	0.033	False	0.059	-0.026	-0.418635	0.675483
10048	eudicotyledons	SPECIATION	Pentapetalae	SPECIATION	0.033	False	0.059	-0.026	-0.418635	0.675483
10048	eudicotyledons	SPECIATION	Pentapetalae	SPECIATION	0.039	False	0.059	-0.02	-0.379966	0.703971
47021	eudicotyledons	SPECIATION	Pentapetalae	SPECIATION	0.056	False	0.089	-0.033	-0.463749	0.642828
13151	eudicotyledons	SPECIATION	Pentapetalae	SPECIATION	0.101	False	0.086	0.015	-0.154398	0.877296
47590	eudicotyledons	SPECIATION	Pentapetalae	SPECIATION	0.095	False	0.136	-0.041	-0.515307	0.606338
43795	eudicotyledons	SPECIATION	Pentapetalae	SPECIATION	0.28	True	0.074	0.206	1.07656	0.281676
43795	eudicotyledons	SPECIATION	Pentapetalae	SPECIATION	0.218	True	0.074	0.144	0.676983	0.498417
43795	eudicotyledons	SPECIATION	Pentapetalae	SPECIATION	0.244	False	0.074	0.17	0.844548	0.398363
43795	eudicotyledons	SPECIATION	Pentapetalae	SPECIATION	0.064	False	0.074	-0.01	-0.315518	0.752368
43795	eudicotyledons	SPECIATION	Pentapetalae	SPECIATION	0.158	True	0.074	0.084	0.290294	0.771591
43795	eudicotyledons	SPECIATION	Pentapetalae	SPECIATION	0.115	True	0.074	0.041	0.0131674	0.989494
43795	eudicotyledons	SPECIATION	Pentapetalae	SPECIATION	0.057	False	0.074	-0.017	-0.360632	0.718375
43795	eudicotyledons	SPECIATION	Pentapetalae	SPECIATION	0.107	True	0.074	0.033	-0.0383911	0.969376
43795	eudicotyledons	SPECIATION	Pentapetalae	SPECIATION	0.106	True	0.074	0.032	-0.0448359	0.964238
43795	eudicotyledons	SPECIATION	Pentapetalae	SPECIATION	0.182	True	0.074	0.108	0.44497	0.656342
43795	eudicotyledons	SPECIATION	Pentapetalae	SPECIATION	0.106	True	0.074	0.032	-0.0448359	0.964238
43795	eudicotyledons	SPECIATION	Pentapetalae	SPECIATION	0.073	True	0.074	-0.001	-0.257515	0.796781
43795	eudicotyledons	SPECIATION	Pentapetalae	SPECIATION	0.073	False	0.074	-0.001	-0.257515	0.796781
43795	eudicotyledons	SPECIATION	Pentapetalae	SPECIATION	0.032	False	0.074	-0.042	-0.521752	0.601843
24106	eudicotyledons	SPECIATION	Pentapetalae	SPECIATION	0.128	False	0.111	0.017	-0.141508	0.887469
12729	eudicotyledons	SPECIATION	Pentapetalae	SPECIATION	0.216	False	0.071	0.145	0.683428	0.494337
32382	eudicotyledons	SPECIATION	Pentapetalae	SPECIATION	0.132	False	0.158	-0.026	-0.418635	0.675483
32382	eudicotyledons	SPECIATION	Pentapetalae	SPECIATION	0.046	False	0.158	-0.112	-0.972889	0.330609
32382	eudicotyledons	SPECIATION	Pentapetalae	SPECIATION	0.098	False	0.158	-0.06	-0.637759	0.523631
32382	eudicotyledons	SPECIATION	Pentapetalae	SPECIATION	0.084	False	0.158	-0.074	-0.727986	0.466622
23001	eudicotyledons	SPECIATION	Pentapetalae	SPECIATION	0.036	True	0.042	-0.006	-0.289739	0.772016
23001	eudicotyledons	SPECIATION	Pentapetalae	SPECIATION	0.066	True	0.042	0.024	-0.0963944	0.923207
23001	eudicotyledons	SPECIATION	Pentapetalae	SPECIATION	0.058	True	0.042	0.016	-0.147953	0.88238
23001	eudicotyledons	SPECIATION	Pentapetalae	SPECIATION	0.007	False	0.042	-0.035	-0.476638	0.63362
33524	eudicotyledons	SPECIATION	Pentapetalae	SPECIATION	0.071	False	0.082	-0.011	-0.321963	0.747481
24071	eudicotyledons	SPECIATION	Pentapetalae	SPECIATION	0.022	False	0.027	-0.005	-0.283294	0.776951
24071	eudicotyledons	SPECIATION	Pentapetalae	SPECIATION	0.03	True	0.027	0.003	-0.231735	0.816743
24071	eudicotyledons	SPECIATION	Pentapetalae	SPECIATION	0.01	True	0.027	-0.017	-0.360632	0.718375
13302	eudicotyledons	SPECIATION	Pentapetalae	SPECIATION	0.047	False	0.083	-0.036	-0.483083	0.629037
43364	eudicotyledons	SPECIATION	Pentapetalae	SPECIATION	0.035	False	0.066	-0.031	-0.450859	0.652091
37761	eudicotyledons	SPECIATION	Pentapetalae	SPECIATION	0.103	False	0.102	0.001	-0.244625	0.806747
34484	eudicotyledons	SPECIATION	Pentapetalae	SPECIATION	0.028	False	0.13	-0.102	-0.908441	0.363645
45894	eudicotyledons	SPECIATION	Pentapetalae	SPECIATION	0.016	False	0.045	-0.029	-0.437969	0.661408
45663	eudicotyledons	SPECIATION	Pentapetalae	SPECIATION	0.128	False	0.088	0.04	0.00672256	0.994636
45663	eudicotyledons	SPECIATION	Pentapetalae	SPECIATION	0.078	False	0.088	-0.01	-0.315518	0.752368
45663	eudicotyledons	SPECIATION	Pentapetalae	SPECIATION	0.115	False	0.088	0.027	-0.07706	0.938576
45663	eudicotyledons	SPECIATION	Pentapetalae	SPECIATION	0.206	False	0.088	0.118	0.509418	0.610459
45663	eudicotyledons	SPECIATION	Pentapetalae	SPECIATION	0.109	True	0.088	0.021	-0.115729	0.907867
45663	eudicotyledons	SPECIATION	Pentapetalae	SPECIATION	0.149	True	0.088	0.061	0.142064	0.88703
43269	eudicotyledons	SPECIATION	Pentapetalae	SPECIATION	0.027	False	0.04	-0.013	-0.334852	0.737736
12608	eudicotyledons	SPECIATION	Pentapetalae	SPECIATION	0.059	False	0.048	0.011	-0.180177	0.857014
12608	eudicotyledons	SPECIATION	Pentapetalae	SPECIATION	0.048	False	0.048	0	-0.25107	0.80176
12608	eudicotyledons	SPECIATION	Pentapetalae	SPECIATION	0.031	False	0.048	-0.017	-0.360632	0.718375
12608	eudicotyledons	SPECIATION	Pentapetalae	SPECIATION	0.074	False	0.048	0.026	-0.0835048	0.93345
12595	eudicotyledons	SPECIATION	Pentapetalae	SPECIATION	0.064	False	0.057	0.007	-0.205956	0.836825
48103	eudicotyledons	SPECIATION	Pentapetalae	SPECIATION	0.146	False	0.085	0.061	0.142064	0.88703
12290	eudicotyledons	SPECIATION	Pentapetalae	SPECIATION	0.118	False	0.061	0.057	0.116284	0.907427
12290	eudicotyledons	SPECIATION	Pentapetalae	SPECIATION	0.329	False	0.061	0.268	1.47614	0.139906
12290	eudicotyledons	SPECIATION	Pentapetalae	SPECIATION	0.056	False	0.061	-0.005	-0.283294	0.776951
33294	eudicotyledons	SPECIATION	Pentapetalae	SPECIATION	0.183	False	0.1	0.083	0.283849	0.776526
33294	eudicotyledons	SPECIATION	Pentapetalae	SPECIATION	0.122	False	0.1	0.022	-0.109284	0.912977
33294	eudicotyledons	SPECIATION	Pentapetalae	SPECIATION	0.104	False	0.1	0.004	-0.225291	0.821753
11850	eudicotyledons	SPECIATION	Pentapetalae	SPECIATION	0.033	True	0.065	-0.032	-0.457304	0.647453
11850	eudicotyledons	SPECIATION	Pentapetalae	SPECIATION	0.013	True	0.065	-0.052	-0.5862	0.557741
11850	eudicotyledons	SPECIATION	Pentapetalae	SPECIATION	0.013	False	0.065	-0.052	-0.5862	0.557741
11850	eudicotyledons	SPECIATION	Pentapetalae	SPECIATION	0.007	False	0.065	-0.058	-0.624869	0.532057
11850	eudicotyledons	SPECIATION	Pentapetalae	SPECIATION	0.116	True	0.065	0.051	0.0776155	0.938134
11850	eudicotyledons	SPECIATION	Pentapetalae	SPECIATION	0.125	True	0.065	0.06	0.135619	0.892123
11850	eudicotyledons	SPECIATION	Pentapetalae	SPECIATION	0.049	False	0.065	-0.016	-0.354187	0.723199
11850	eudicotyledons	SPECIATION	Pentapetalae	SPECIATION	0.029	True	0.065	-0.036	-0.483083	0.629037
11850	eudicotyledons	SPECIATION	Pentapetalae	SPECIATION	0.007	True	0.065	-0.058	-0.624869	0.532057
11850	eudicotyledons	SPECIATION	Pentapetalae	SPECIATION	0.046	False	0.065	-0.019	-0.373521	0.70876
11850	eudicotyledons	SPECIATION	Pentapetalae	SPECIATION	0.039	False	0.065	-0.026	-0.418635	0.675483
11850	eudicotyledons	SPECIATION	Pentapetalae	SPECIATION	0.043	False	0.065	-0.022	-0.392856	0.694426
11850	eudicotyledons	SPECIATION	Pentapetalae	SPECIATION	0.084	False	0.065	0.019	-0.128618	0.89766
11850	eudicotyledons	SPECIATION	Pentapetalae	SPECIATION	0.094	True	0.065	0.029	-0.0641704	0.948835
11850	eudicotyledons	SPECIATION	Pentapetalae	SPECIATION	0.04	True	0.065	-0.025	-0.41219	0.6802
11850	eudicotyledons	SPECIATION	Pentapetalae	SPECIATION	0.107	True	0.065	0.042	0.0196122	0.984353
11850	eudicotyledons	SPECIATION	Pentapetalae	SPECIATION	0.077	True	0.065	0.012	-0.173732	0.862076
11850	eudicotyledons	SPECIATION	Pentapetalae	SPECIATION	0.025	False	0.065	-0.04	-0.508862	0.610849
11850	eudicotyledons	SPECIATION	Pentapetalae	SPECIATION	0.042	False	0.065	-0.023	-0.399301	0.689672
11850	eudicotyledons	SPECIATION	Pentapetalae	SPECIATION	0.071	True	0.065	0.006	-0.212401	0.831794
11850	eudicotyledons	SPECIATION	Pentapetalae	SPECIATION	0.085	True	0.065	0.02	-0.122174	0.902761
11850	eudicotyledons	SPECIATION	Pentapetalae	SPECIATION	0.078	True	0.065	0.013	-0.167287	0.867144
13243	eudicotyledons	SPECIATION	Pentapetalae	SPECIATION	0.122	False	0.08	0.042	0.0196122	0.984353
34659	eudicotyledons	SPECIATION	Pentapetalae	SPECIATION	0.617	True	0.333	0.284	1.57926	0.114277
34659	eudicotyledons	SPECIATION	Pentapetalae	SPECIATION	0.704	True	0.333	0.371	2.13996	0.0323584
43134	eudicotyledons	SPECIATION	Pentapetalae	SPECIATION	0.01	False	0.042	-0.032	-0.457304	0.647453
43134	eudicotyledons	SPECIATION	Pentapetalae	SPECIATION	0.024	False	0.042	-0.018	-0.367077	0.713562
32467	eudicotyledons	SPECIATION	Pentapetalae	SPECIATION	0.084	False	0.048	0.036	-0.0190567	0.984796
32467	eudicotyledons	SPECIATION	Pentapetalae	SPECIATION	0.074	False	0.048	0.026	-0.0835048	0.93345
32467	eudicotyledons	SPECIATION	Pentapetalae	SPECIATION	0.059	True	0.048	0.011	-0.180177	0.857014
32467	eudicotyledons	SPECIATION	Pentapetalae	SPECIATION	0.039	True	0.048	-0.009	-0.309073	0.757266
32467	eudicotyledons	SPECIATION	Pentapetalae	SPECIATION	0.013	False	0.048	-0.035	-0.476638	0.63362
32467	eudicotyledons	SPECIATION	Pentapetalae	SPECIATION	0.038	True	0.048	-0.01	-0.315518	0.752368
32467	eudicotyledons	SPECIATION	Pentapetalae	SPECIATION	0.038	True	0.048	-0.01	-0.315518	0.752368
32467	eudicotyledons	SPECIATION	Pentapetalae	SPECIATION	0.092	False	0.048	0.044	0.0325018	0.974072
32467	eudicotyledons	SPECIATION	Pentapetalae	SPECIATION	0.07	False	0.048	0.022	-0.109284	0.912977
32467	eudicotyledons	SPECIATION	Pentapetalae	SPECIATION	1.724	True	0.048	1.676	10.5504	0
32467	eudicotyledons	SPECIATION	Pentapetalae	SPECIATION	0.045	True	0.048	-0.003	-0.270404	0.786849
32467	eudicotyledons	SPECIATION	Pentapetalae	SPECIATION	0.05	False	0.048	0.002	-0.23818	0.811741
32467	eudicotyledons	SPECIATION	Pentapetalae	SPECIATION	0.006	False	0.048	-0.042	-0.521752	0.601843
32467	eudicotyledons	SPECIATION	Pentapetalae	SPECIATION	0	False	0.048	-0.048	-0.560421	0.575192
32467	eudicotyledons	SPECIATION	Pentapetalae	SPECIATION	0.089	False	0.048	0.041	0.0131674	0.989494
32467	eudicotyledons	SPECIATION	Pentapetalae	SPECIATION	0.012	False	0.048	-0.036	-0.483083	0.629037
35516	eudicotyledons	SPECIATION	Pentapetalae	SPECIATION	0	False	0.137	-0.137	-1.13401	0.256791
31048	eudicotyledons	SPECIATION	Pentapetalae	SPECIATION	0.12	False	0.096	0.024	-0.0963944	0.923207
31048	eudicotyledons	SPECIATION	Pentapetalae	SPECIATION	0.07	False	0.096	-0.026	-0.418635	0.675483
31048	eudicotyledons	SPECIATION	Pentapetalae	SPECIATION	0.025	False	0.096	-0.071	-0.708652	0.478541
31048	eudicotyledons	SPECIATION	Pentapetalae	SPECIATION	0.163	True	0.096	0.067	0.180732	0.856578
31048	eudicotyledons	SPECIATION	Pentapetalae	SPECIATION	0.164	True	0.096	0.068	0.187177	0.851522
31048	eudicotyledons	SPECIATION	Pentapetalae	SPECIATION	0.149	True	0.096	0.053	0.0905051	0.927886
31048	eudicotyledons	SPECIATION	Pentapetalae	SPECIATION	0.03	False	0.096	-0.066	-0.676427	0.498769
31048	eudicotyledons	SPECIATION	Pentapetalae	SPECIATION	0.225	True	0.096	0.129	0.580311	0.561705
31048	eudicotyledons	SPECIATION	Pentapetalae	SPECIATION	0.124	True	0.096	0.028	-0.0706152	0.943704
31048	eudicotyledons	SPECIATION	Pentapetalae	SPECIATION	0.168	True	0.096	0.072	0.212957	0.831361
31048	eudicotyledons	SPECIATION	Pentapetalae	SPECIATION	0.146	True	0.096	0.05	0.0711707	0.943262
31048	eudicotyledons	SPECIATION	Pentapetalae	SPECIATION	0.196	True	0.096	0.1	0.393411	0.694016
31048	eudicotyledons	SPECIATION	Pentapetalae	SPECIATION	0.11	True	0.096	0.014	-0.160843	0.872217
31048	eudicotyledons	SPECIATION	Pentapetalae	SPECIATION	0.059	False	0.096	-0.037	-0.489528	0.624468
31048	eudicotyledons	SPECIATION	Pentapetalae	SPECIATION	0.018	False	0.096	-0.078	-0.753765	0.45099
31048	eudicotyledons	SPECIATION	Pentapetalae	SPECIATION	0.124	True	0.096	0.028	-0.0706152	0.943704
31048	eudicotyledons	SPECIATION	Pentapetalae	SPECIATION	0.098	True	0.096	0.002	-0.23818	0.811741
31048	eudicotyledons	SPECIATION	Pentapetalae	SPECIATION	0.066	False	0.096	-0.03	-0.444414	0.656743
31048	eudicotyledons	SPECIATION	Pentapetalae	SPECIATION	0.088	False	0.096	-0.008	-0.302628	0.762173
11010	eudicotyledons	SPECIATION	Pentapetalae	SPECIATION	0.057	False	0.083	-0.026	-0.418635	0.675483
11010	eudicotyledons	SPECIATION	Pentapetalae	SPECIATION	0.173	True	0.083	0.09	0.328963	0.742184
11010	eudicotyledons	SPECIATION	Pentapetalae	SPECIATION	0.096	True	0.083	0.013	-0.167287	0.867144
11010	eudicotyledons	SPECIATION	Pentapetalae	SPECIATION	0.115	False	0.083	0.032	-0.0448359	0.964238
11010	eudicotyledons	SPECIATION	Pentapetalae	SPECIATION	0.112	False	0.083	0.029	-0.0641704	0.948835
11010	eudicotyledons	SPECIATION	Pentapetalae	SPECIATION	0.072	False	0.083	-0.011	-0.321963	0.747481
43242	eudicotyledons	SPECIATION	Pentapetalae	SPECIATION	0.11	False	0.067	0.043	0.026057	0.979212
12046	eudicotyledons	SPECIATION	Pentapetalae	SPECIATION	0.183	False	0.088	0.095	0.361187	0.717959
45936	eudicotyledons	SPECIATION	Pentapetalae	SPECIATION	0.055	False	0.06	-0.005	-0.283294	0.776951
46347	eudicotyledons	SPECIATION	Pentapetalae	SPECIATION	0.059	False	0.065	-0.006	-0.289739	0.772016
46347	eudicotyledons	SPECIATION	Pentapetalae	SPECIATION	0.053	False	0.065	-0.012	-0.328408	0.742603
46347	eudicotyledons	SPECIATION	Pentapetalae	SPECIATION	1.012	True	0.065	0.947	5.85217	4.85209e-09
46347	eudicotyledons	SPECIATION	Pentapetalae	SPECIATION	0.094	True	0.065	0.029	-0.0641704	0.948835
12655	eudicotyledons	SPECIATION	Pentapetalae	SPECIATION	0.18	True	0.082	0.098	0.380522	0.703558
12655	eudicotyledons	SPECIATION	Pentapetalae	SPECIATION	0.125	True	0.082	0.043	0.026057	0.979212
32444	eudicotyledons	SPECIATION	Pentapetalae	SPECIATION	0.154	False	0.208	-0.054	-0.59909	0.549113
32444	eudicotyledons	SPECIATION	Pentapetalae	SPECIATION	0.145	False	0.208	-0.063	-0.657093	0.511121
32444	eudicotyledons	SPECIATION	Pentapetalae	SPECIATION	0.342	True	0.208	0.134	0.612535	0.540184
32444	eudicotyledons	SPECIATION	Pentapetalae	SPECIATION	0.455	True	0.208	0.247	1.3408	0.179986
32444	eudicotyledons	SPECIATION	Pentapetalae	SPECIATION	0.956	True	0.208	0.748	4.56965	4.88541e-06
32444	eudicotyledons	SPECIATION	Pentapetalae	SPECIATION	0.236	True	0.208	0.028	-0.0706152	0.943704
32444	eudicotyledons	SPECIATION	Pentapetalae	SPECIATION	0.183	False	0.208	-0.025	-0.41219	0.6802
32444	eudicotyledons	SPECIATION	Pentapetalae	SPECIATION	0.274	True	0.208	0.066	0.174288	0.861639
32444	eudicotyledons	SPECIATION	Pentapetalae	SPECIATION	0.171	True	0.208	-0.037	-0.489528	0.624468
32444	eudicotyledons	SPECIATION	Pentapetalae	SPECIATION	0.05	False	0.208	-0.158	-1.26935	0.204316
32444	eudicotyledons	SPECIATION	Pentapetalae	SPECIATION	0.102	False	0.208	-0.106	-0.93422	0.35019
32444	eudicotyledons	SPECIATION	Pentapetalae	SPECIATION	0.27	True	0.208	0.062	0.148508	0.881942
32444	eudicotyledons	SPECIATION	Pentapetalae	SPECIATION	0.323	True	0.208	0.115	0.490083	0.624075
32444	eudicotyledons	SPECIATION	Pentapetalae	SPECIATION	0.185	True	0.208	-0.023	-0.399301	0.689672
32444	eudicotyledons	SPECIATION	Pentapetalae	SPECIATION	0.16	False	0.208	-0.048	-0.560421	0.575192
32444	eudicotyledons	SPECIATION	Pentapetalae	SPECIATION	0.269	False	0.208	0.061	0.142064	0.88703
22925	eudicotyledons	SPECIATION	Pentapetalae	SPECIATION	0.078	False	0.08	-0.002	-0.26396	0.791811
12398	eudicotyledons	SPECIATION	Pentapetalae	SPECIATION	0.086	False	0.102	-0.016	-0.354187	0.723199
13096	eudicotyledons	SPECIATION	Pentapetalae	SPECIATION	0.206	False	0.099	0.107	0.438525	0.661006
45806	eudicotyledons	SPECIATION	Pentapetalae	SPECIATION	0.037	False	0.057	-0.02	-0.379966	0.703971
47964	eudicotyledons	SPECIATION	Pentapetalae	SPECIATION	0.082	False	0.059	0.023	-0.102839	0.918091
12903	eudicotyledons	SPECIATION	Pentapetalae	SPECIATION	0	False	0.061	-0.061	-0.644203	0.519444
12903	eudicotyledons	SPECIATION	Pentapetalae	SPECIATION	0.079	False	0.061	0.018	-0.135063	0.892562
13102	eudicotyledons	SPECIATION	Pentapetalae	SPECIATION	0.137	False	0.113	0.024	-0.0963944	0.923207
13021	eudicotyledons	SPECIATION	Pentapetalae	SPECIATION	0.04	False	0.052	-0.012	-0.328408	0.742603
13718	eudicotyledons	SPECIATION	Pentapetalae	SPECIATION	0.016	False	0.045	-0.029	-0.437969	0.661408
13718	eudicotyledons	SPECIATION	Pentapetalae	SPECIATION	0.092	False	0.045	0.047	0.0518362	0.958659
13718	eudicotyledons	SPECIATION	Pentapetalae	SPECIATION	0.035	False	0.045	-0.01	-0.315518	0.752368
13211	eudicotyledons	SPECIATION	Pentapetalae	SPECIATION	0.096	False	0.09	0.006	-0.212401	0.831794
12461	eudicotyledons	SPECIATION	Pentapetalae	SPECIATION	0.057	False	0.072	-0.015	-0.347742	0.728034
12461	eudicotyledons	SPECIATION	Pentapetalae	SPECIATION	0.12	False	0.072	0.048	0.0582811	0.953525
12461	eudicotyledons	SPECIATION	Pentapetalae	SPECIATION	0.052	False	0.072	-0.02	-0.379966	0.703971
12949	eudicotyledons	SPECIATION	Pentapetalae	SPECIATION	0.143	False	0.112	0.031	-0.0512807	0.959102
11062	eudicotyledons	SPECIATION	Pentapetalae	SPECIATION	0.057	False	0.075	-0.018	-0.367077	0.713562
11062	eudicotyledons	SPECIATION	Pentapetalae	SPECIATION	0.055	False	0.075	-0.02	-0.379966	0.703971
11062	eudicotyledons	SPECIATION	Pentapetalae	SPECIATION	0.067	False	0.075	-0.008	-0.302628	0.762173
11062	eudicotyledons	SPECIATION	Pentapetalae	SPECIATION	0.04	False	0.075	-0.035	-0.476638	0.63362
11062	eudicotyledons	SPECIATION	Pentapetalae	SPECIATION	0.017	False	0.075	-0.058	-0.624869	0.532057
11062	eudicotyledons	SPECIATION	Pentapetalae	SPECIATION	0.073	False	0.075	-0.002	-0.26396	0.791811
11062	eudicotyledons	SPECIATION	Pentapetalae	SPECIATION	0.152	True	0.075	0.077	0.245181	0.806317
11062	eudicotyledons	SPECIATION	Pentapetalae	SPECIATION	0.138	True	0.075	0.063	0.154953	0.876858
11062	eudicotyledons	SPECIATION	Pentapetalae	SPECIATION	0.105	False	0.075	0.03	-0.0577256	0.953967
11062	eudicotyledons	SPECIATION	Pentapetalae	SPECIATION	0.105	False	0.075	0.03	-0.0577256	0.953967
11062	eudicotyledons	SPECIATION	Pentapetalae	SPECIATION	0.012	False	0.075	-0.063	-0.657093	0.511121
11062	eudicotyledons	SPECIATION	Pentapetalae	SPECIATION	0.109	False	0.075	0.034	-0.0319463	0.974515
11062	eudicotyledons	SPECIATION	Pentapetalae	SPECIATION	0.053	False	0.075	-0.022	-0.392856	0.694426
11062	eudicotyledons	SPECIATION	Pentapetalae	SPECIATION	0.054	False	0.075	-0.021	-0.386411	0.699192
11062	eudicotyledons	SPECIATION	Pentapetalae	SPECIATION	0.012	False	0.075	-0.063	-0.657093	0.511121
11062	eudicotyledons	SPECIATION	Pentapetalae	SPECIATION	0.059	False	0.075	-0.016	-0.354187	0.723199
11062	eudicotyledons	SPECIATION	Pentapetalae	SPECIATION	0.218	True	0.075	0.143	0.670538	0.502515
11062	eudicotyledons	SPECIATION	Pentapetalae	SPECIATION	0.123	True	0.075	0.048	0.0582811	0.953525
11062	eudicotyledons	SPECIATION	Pentapetalae	SPECIATION	0.236	True	0.075	0.161	0.786545	0.431548
11062	eudicotyledons	SPECIATION	Pentapetalae	SPECIATION	0.122	True	0.075	0.047	0.0518362	0.958659
11062	eudicotyledons	SPECIATION	Pentapetalae	SPECIATION	0.065	False	0.075	-0.01	-0.315518	0.752368
11062	eudicotyledons	SPECIATION	Pentapetalae	SPECIATION	0.113	False	0.075	0.038	-0.00616706	0.995079
11062	eudicotyledons	SPECIATION	Pentapetalae	SPECIATION	0.057	False	0.075	-0.018	-0.367077	0.713562
11062	eudicotyledons	SPECIATION	Pentapetalae	SPECIATION	0.192	True	0.075	0.117	0.502973	0.614983
11062	eudicotyledons	SPECIATION	Pentapetalae	SPECIATION	0.207	True	0.075	0.132	0.599645	0.548743
11062	eudicotyledons	SPECIATION	Pentapetalae	SPECIATION	0.182	True	0.075	0.107	0.438525	0.661006
11062	eudicotyledons	SPECIATION	Pentapetalae	SPECIATION	0.083	False	0.075	0.008	-0.199511	0.841863
11062	eudicotyledons	SPECIATION	Pentapetalae	SPECIATION	0.029	False	0.075	-0.046	-0.547531	0.584014
11062	eudicotyledons	SPECIATION	Pentapetalae	SPECIATION	0.033	False	0.075	-0.042	-0.521752	0.601843
11062	eudicotyledons	SPECIATION	Pentapetalae	SPECIATION	0.202	True	0.075	0.127	0.567421	0.570428
11062	eudicotyledons	SPECIATION	Pentapetalae	SPECIATION	0.063	True	0.075	-0.012	-0.328408	0.742603
11062	eudicotyledons	SPECIATION	Pentapetalae	SPECIATION	0.088	False	0.075	0.013	-0.167287	0.867144
11062	eudicotyledons	SPECIATION	Pentapetalae	SPECIATION	0.026	False	0.075	-0.049	-0.566866	0.570805
34944	eudicotyledons	SPECIATION	Pentapetalae	SPECIATION	0.08	False	0.081	-0.001	-0.257515	0.796781
36047	eudicotyledons	SPECIATION	Pentapetalae	SPECIATION	0.062	False	0.057	0.005	-0.218846	0.82677
35507	eudicotyledons	SPECIATION	Pentapetalae	SPECIATION	0.147	False	0.188	-0.041	-0.515307	0.606338
31835	eudicotyledons	SPECIATION	Pentapetalae	SPECIATION	0.083	False	0.089	-0.006	-0.289739	0.772016
33281	eudicotyledons	SPECIATION	Pentapetalae	SPECIATION	0.072	False	0.104	-0.032	-0.457304	0.647453
45880	eudicotyledons	SPECIATION	Pentapetalae	SPECIATION	0.024	False	0.064	-0.04	-0.508862	0.610849
21327	eudicotyledons	SPECIATION	Pentapetalae	SPECIATION	0.052	False	0.048	0.004	-0.225291	0.821753
21327	eudicotyledons	SPECIATION	Pentapetalae	SPECIATION	0.054	True	0.048	0.006	-0.212401	0.831794
21327	eudicotyledons	SPECIATION	Pentapetalae	SPECIATION	0.058	True	0.048	0.01	-0.186622	0.851957
36983	eudicotyledons	SPECIATION	Pentapetalae	SPECIATION	0.045	False	0.062	-0.017	-0.360632	0.718375
33879	eudicotyledons	SPECIATION	Pentapetalae	SPECIATION	0.074	False	0.125	-0.051	-0.579755	0.56208
23274	eudicotyledons	SPECIATION	Pentapetalae	SPECIATION	0.131	False	0.094	0.037	-0.0126119	0.989937
47318	eudicotyledons	SPECIATION	Pentapetalae	SPECIATION	0.045	False	0.063	-0.018	-0.367077	0.713562
38400	eudicotyledons	SPECIATION	Pentapetalae	SPECIATION	0.076	False	0.08	-0.004	-0.276849	0.781896
47720	eudicotyledons	SPECIATION	Pentapetalae	SPECIATION	0.067	False	0.125	-0.058	-0.624869	0.532057
48156	eudicotyledons	SPECIATION	Pentapetalae	SPECIATION	0.225	False	0.137	0.088	0.316074	0.751947
28677	eudicotyledons	SPECIATION	Pentapetalae	SPECIATION	0.027	True	0.044	-0.017	-0.360632	0.718375
28677	eudicotyledons	SPECIATION	Pentapetalae	SPECIATION	0	True	0.044	-0.044	-0.534642	0.592898
22809	eudicotyledons	SPECIATION	Pentapetalae	SPECIATION	0.135	False	0.065	0.07	0.200067	0.841428
22809	eudicotyledons	SPECIATION	Pentapetalae	SPECIATION	0.465	True	0.065	0.4	2.32685	0.019973
22809	eudicotyledons	SPECIATION	Pentapetalae	SPECIATION	0.133	True	0.065	0.068	0.187177	0.851522
21262	eudicotyledons	SPECIATION	Pentapetalae	SPECIATION	0.086	False	0.066	0.02	-0.122174	0.902761
21262	eudicotyledons	SPECIATION	Pentapetalae	SPECIATION	0.056	False	0.066	-0.01	-0.315518	0.752368
21262	eudicotyledons	SPECIATION	Pentapetalae	SPECIATION	0.082	False	0.066	0.016	-0.147953	0.88238
47813	eudicotyledons	SPECIATION	Pentapetalae	SPECIATION	0.124	False	0.141	-0.017	-0.360632	0.718375
11200	eudicotyledons	SPECIATION	Pentapetalae	SPECIATION	0.142	True	0.082	0.06	0.135619	0.892123
11200	eudicotyledons	SPECIATION	Pentapetalae	SPECIATION	0.103	True	0.082	0.021	-0.115729	0.907867
11200	eudicotyledons	SPECIATION	Pentapetalae	SPECIATION	0.137	False	0.082	0.055	0.103395	0.91765
35106	eudicotyledons	SPECIATION	Pentapetalae	SPECIATION	0.092	False	0.089	0.003	-0.231735	0.816743
35106	eudicotyledons	SPECIATION	Pentapetalae	SPECIATION	0.122	False	0.089	0.033	-0.0383911	0.969376
33680	eudicotyledons	SPECIATION	Pentapetalae	SPECIATION	0.928	True	0.374	0.554	3.31936	0.000902254
33680	eudicotyledons	SPECIATION	Pentapetalae	SPECIATION	0.039	True	0.374	-0.335	-2.41008	0.0159489
11830	eudicotyledons	SPECIATION	Pentapetalae	SPECIATION	0.03	False	0.045	-0.015	-0.347742	0.728034
31860	eudicotyledons	SPECIATION	Pentapetalae	SPECIATION	0.12	False	0.092	0.028	-0.0706152	0.943704
33784	eudicotyledons	SPECIATION	Pentapetalae	SPECIATION	0.361	False	0.476	-0.115	-0.992223	0.321089
32001	eudicotyledons	SPECIATION	Pentapetalae	SPECIATION	0.053	False	0.061	-0.008	-0.302628	0.762173
46632	eudicotyledons	SPECIATION	Pentapetalae	SPECIATION	0.63	True	0.285	0.345	1.97239	0.0485651
46632	eudicotyledons	SPECIATION	Pentapetalae	SPECIATION	0.359	True	0.285	0.074	0.225846	0.821321
36383	eudicotyledons	SPECIATION	Pentapetalae	SPECIATION	0.126	False	0.111	0.015	-0.154398	0.877296
12866	eudicotyledons	SPECIATION	Pentapetalae	SPECIATION	0.029	False	0.067	-0.038	-0.495973	0.619914
12866	eudicotyledons	SPECIATION	Pentapetalae	SPECIATION	0.135	False	0.067	0.068	0.187177	0.851522
35993	eudicotyledons	SPECIATION	Pentapetalae	SPECIATION	0.135	False	0.104	0.031	-0.0512807	0.959102
43650	eudicotyledons	SPECIATION	Pentapetalae	SPECIATION	0.037	False	0.056	-0.019	-0.373521	0.70876
43650	eudicotyledons	SPECIATION	Pentapetalae	SPECIATION	0.028	False	0.056	-0.028	-0.431525	0.666087
47832	eudicotyledons	SPECIATION	Pentapetalae	SPECIATION	0.16	False	0.109	0.051	0.0776155	0.938134
12448	eudicotyledons	SPECIATION	Pentapetalae	SPECIATION	0.06	False	0.069	-0.009	-0.309073	0.757266
36727	eudicotyledons	SPECIATION	Pentapetalae	SPECIATION	0.189	False	0.13	0.059	0.129174	0.89722
28620	eudicotyledons	SPECIATION	Pentapetalae	SPECIATION	0.117	False	0.076	0.041	0.0131674	0.989494
34186	eudicotyledons	SPECIATION	Pentapetalae	SPECIATION	0.067	False	0.054	0.013	-0.167287	0.867144
43718	eudicotyledons	SPECIATION	Pentapetalae	SPECIATION	0.027	False	0.043	-0.016	-0.354187	0.723199
10457	eudicotyledons	SPECIATION	Pentapetalae	SPECIATION	0.023	False	0.062	-0.039	-0.502418	0.615374
10457	eudicotyledons	SPECIATION	Pentapetalae	SPECIATION	0.096	False	0.062	0.034	-0.0319463	0.974515
10457	eudicotyledons	SPECIATION	Pentapetalae	SPECIATION	0.125	True	0.062	0.063	0.154953	0.876858
10457	eudicotyledons	SPECIATION	Pentapetalae	SPECIATION	0.085	True	0.062	0.023	-0.102839	0.918091
43245	eudicotyledons	SPECIATION	Pentapetalae	SPECIATION	0.019	False	0.063	-0.044	-0.534642	0.592898
43245	eudicotyledons	SPECIATION	Pentapetalae	SPECIATION	0.013	False	0.063	-0.05	-0.573311	0.566434
14194	eudicotyledons	SPECIATION	Pentapetalae	SPECIATION	0.041	False	0.044	-0.003	-0.270404	0.786849
43350	eudicotyledons	SPECIATION	Pentapetalae	SPECIATION	0.1	False	0.078	0.022	-0.109284	0.912977
33604	eudicotyledons	SPECIATION	Pentapetalae	SPECIATION	0.082	False	0.075	0.007	-0.205956	0.836825
33604	eudicotyledons	SPECIATION	Pentapetalae	SPECIATION	0.036	False	0.075	-0.039	-0.502418	0.615374
23003	eudicotyledons	SPECIATION	Pentapetalae	SPECIATION	0.249	False	0.104	0.145	0.683428	0.494337
23003	eudicotyledons	SPECIATION	Pentapetalae	SPECIATION	0.809	False	0.104	0.705	4.29252	1.76655e-05
21091	eudicotyledons	SPECIATION	Pentapetalae	SPECIATION	0.044	False	0.042	0.002	-0.23818	0.811741
21091	eudicotyledons	SPECIATION	Pentapetalae	SPECIATION	0.018	False	0.042	-0.024	-0.405745	0.68493
23216	eudicotyledons	SPECIATION	Pentapetalae	SPECIATION	0.175	False	0.171	0.004	-0.225291	0.821753
10383	eudicotyledons	SPECIATION	Pentapetalae	SPECIATION	0.111	False	0.07	0.041	0.0131674	0.989494
10383	eudicotyledons	SPECIATION	Pentapetalae	SPECIATION	0.083	False	0.07	0.013	-0.167287	0.867144
10383	eudicotyledons	SPECIATION	Pentapetalae	SPECIATION	0.032	False	0.07	-0.038	-0.495973	0.619914
10383	eudicotyledons	SPECIATION	Pentapetalae	SPECIATION	0.079	False	0.07	0.009	-0.193067	0.846907
19970	eudicotyledons	SPECIATION	Pentapetalae	SPECIATION	0	False	0.024	-0.024	-0.405745	0.68493
33650	eudicotyledons	SPECIATION	Pentapetalae	SPECIATION	0.051	False	0.07	-0.019	-0.373521	0.70876
33650	eudicotyledons	SPECIATION	Pentapetalae	SPECIATION	0.033	False	0.07	-0.037	-0.489528	0.624468
14659	eudicotyledons	SPECIATION	Pentapetalae	SPECIATION	0.109	False	0.112	-0.003	-0.270404	0.786849
46136	eudicotyledons	SPECIATION	Pentapetalae	SPECIATION	0.101	False	0.134	-0.033	-0.463749	0.642828
46136	eudicotyledons	SPECIATION	Pentapetalae	SPECIATION	0.119	True	0.134	-0.015	-0.347742	0.728034
46136	eudicotyledons	SPECIATION	Pentapetalae	SPECIATION	0.118	True	0.134	-0.016	-0.354187	0.723199
14003	eudicotyledons	SPECIATION	Pentapetalae	SPECIATION	0.108	False	0.111	-0.003	-0.270404	0.786849
13822	eudicotyledons	SPECIATION	Pentapetalae	SPECIATION	0.026	False	0.062	-0.036	-0.483083	0.629037
13822	eudicotyledons	SPECIATION	Pentapetalae	SPECIATION	0.009	False	0.062	-0.053	-0.592645	0.553419
47858	eudicotyledons	SPECIATION	Pentapetalae	SPECIATION	0.106	False	0.069	0.037	-0.0126119	0.989937
11377	eudicotyledons	SPECIATION	Pentapetalae	SPECIATION	0.043	True	0.046	-0.003	-0.270404	0.786849
11377	eudicotyledons	SPECIATION	Pentapetalae	SPECIATION	0.038	True	0.046	-0.008	-0.302628	0.762173
31088	eudicotyledons	SPECIATION	Pentapetalae	SPECIATION	0.009	False	0.066	-0.057	-0.618424	0.536296
47541	eudicotyledons	SPECIATION	Pentapetalae	SPECIATION	0.074	False	0.082	-0.008	-0.302628	0.762173
37384	eudicotyledons	SPECIATION	Pentapetalae	SPECIATION	0.06	False	0.169	-0.109	-0.953554	0.340309
33668	eudicotyledons	SPECIATION	Pentapetalae	SPECIATION	0	False	0.032	-0.032	-0.457304	0.647453
44080	eudicotyledons	SPECIATION	Pentapetalae	SPECIATION	0.114	True	0.073	0.041	0.0131674	0.989494
44080	eudicotyledons	SPECIATION	Pentapetalae	SPECIATION	0.071	True	0.073	-0.002	-0.26396	0.791811
19302	eudicotyledons	SPECIATION	Pentapetalae	SPECIATION	0.035	False	0.085	-0.05	-0.573311	0.566434
19302	eudicotyledons	SPECIATION	Pentapetalae	SPECIATION	0.061	False	0.085	-0.024	-0.405745	0.68493
19302	eudicotyledons	SPECIATION	Pentapetalae	SPECIATION	0.059	False	0.085	-0.026	-0.418635	0.675483
19302	eudicotyledons	SPECIATION	Pentapetalae	SPECIATION	0.142	False	0.085	0.057	0.116284	0.907427
19302	eudicotyledons	SPECIATION	Pentapetalae	SPECIATION	0.038	False	0.085	-0.047	-0.553976	0.579595
37218	eudicotyledons	SPECIATION	Pentapetalae	SPECIATION	0.176	False	0.148	0.028	-0.0706152	0.943704
47860	eudicotyledons	SPECIATION	Pentapetalae	SPECIATION	0.089	False	0.084	0.005	-0.218846	0.82677
11073	eudicotyledons	SPECIATION	Pentapetalae	SPECIATION	0.021	False	0.05	-0.029	-0.437969	0.661408
11073	eudicotyledons	SPECIATION	Pentapetalae	SPECIATION	0.045	False	0.05	-0.005	-0.283294	0.776951
11073	eudicotyledons	SPECIATION	Pentapetalae	SPECIATION	0.07	True	0.05	0.02	-0.122174	0.902761
11073	eudicotyledons	SPECIATION	Pentapetalae	SPECIATION	0.053	True	0.05	0.003	-0.231735	0.816743
33593	eudicotyledons	SPECIATION	Pentapetalae	SPECIATION	0.062	False	0.11	-0.048	-0.560421	0.575192
33593	eudicotyledons	SPECIATION	Pentapetalae	SPECIATION	0.219	True	0.11	0.109	0.451415	0.651691
33593	eudicotyledons	SPECIATION	Pentapetalae	SPECIATION	0.186	True	0.11	0.076	0.238736	0.81131
39757	eudicotyledons	SPECIATION	Pentapetalae	SPECIATION	0.051	False	0.061	-0.01	-0.315518	0.752368
22050	eudicotyledons	SPECIATION	Pentapetalae	SPECIATION	0.135	False	0.14	-0.005	-0.283294	0.776951
38926	eudicotyledons	SPECIATION	Pentapetalae	SPECIATION	0.077	False	0.208	-0.131	-1.09534	0.273368
38926	eudicotyledons	SPECIATION	Pentapetalae	SPECIATION	0.086	False	0.208	-0.122	-1.03734	0.299579
38926	eudicotyledons	SPECIATION	Pentapetalae	SPECIATION	0.212	False	0.208	0.004	-0.225291	0.821753
35716	eudicotyledons	SPECIATION	Pentapetalae	SPECIATION	0.027	False	0.077	-0.05	-0.573311	0.566434
12395	eudicotyledons	SPECIATION	Pentapetalae	SPECIATION	0.029	False	0.118	-0.089	-0.824658	0.409566
33505	eudicotyledons	SPECIATION	Pentapetalae	SPECIATION	0.158	False	0.085	0.073	0.219401	0.826337
14527	eudicotyledons	SPECIATION	Pentapetalae	SPECIATION	0.185	False	0.135	0.05	0.0711707	0.943262
19378	eudicotyledons	SPECIATION	Pentapetalae	SPECIATION	0.093	False	0.104	-0.011	-0.321963	0.747481
23323	eudicotyledons	SPECIATION	Pentapetalae	SPECIATION	0.043	False	0.08	-0.037	-0.489528	0.624468
23323	eudicotyledons	SPECIATION	Pentapetalae	SPECIATION	0.05	False	0.08	-0.03	-0.444414	0.656743
35094	eudicotyledons	SPECIATION	Pentapetalae	SPECIATION	0.431	True	0.195	0.236	1.26991	0.204118
35094	eudicotyledons	SPECIATION	Pentapetalae	SPECIATION	0.406	True	0.195	0.211	1.10879	0.267523
10961	eudicotyledons	SPECIATION	Pentapetalae	SPECIATION	0.139	False	0.097	0.042	0.0196122	0.984353
11956	eudicotyledons	SPECIATION	Pentapetalae	SPECIATION	0.052	False	0.06	-0.008	-0.302628	0.762173
11142	eudicotyledons	SPECIATION	Pentapetalae	SPECIATION	0.04	False	0.062	-0.022	-0.392856	0.694426
11142	eudicotyledons	SPECIATION	Pentapetalae	SPECIATION	0.098	False	0.062	0.036	-0.0190567	0.984796
11142	eudicotyledons	SPECIATION	Pentapetalae	SPECIATION	0.068	False	0.062	0.006	-0.212401	0.831794
11142	eudicotyledons	SPECIATION	Pentapetalae	SPECIATION	0.106	False	0.062	0.044	0.0325018	0.974072
11142	eudicotyledons	SPECIATION	Pentapetalae	SPECIATION	0.073	False	0.062	0.011	-0.180177	0.857014
11142	eudicotyledons	SPECIATION	Pentapetalae	SPECIATION	0.088	False	0.062	0.026	-0.0835048	0.93345
45633	eudicotyledons	SPECIATION	Pentapetalae	SPECIATION	0.113	False	0.037	0.076	0.238736	0.81131
45633	eudicotyledons	SPECIATION	Pentapetalae	SPECIATION	0.022	False	0.037	-0.015	-0.347742	0.728034
45633	eudicotyledons	SPECIATION	Pentapetalae	SPECIATION	0.057	False	0.037	0.02	-0.122174	0.902761
45633	eudicotyledons	SPECIATION	Pentapetalae	SPECIATION	0.026	False	0.037	-0.011	-0.321963	0.747481
45633	eudicotyledons	SPECIATION	Pentapetalae	SPECIATION	0.063	False	0.037	0.026	-0.0835048	0.93345
45633	eudicotyledons	SPECIATION	Pentapetalae	SPECIATION	0.01	False	0.037	-0.027	-0.42508	0.670778
34126	eudicotyledons	SPECIATION	Pentapetalae	SPECIATION	0.071	False	0.1	-0.029	-0.437969	0.661408
30543	eudicotyledons	SPECIATION	Pentapetalae	SPECIATION	0.069	False	0.084	-0.015	-0.347742	0.728034
35304	eudicotyledons	SPECIATION	Pentapetalae	SPECIATION	0.101	False	0.168	-0.067	-0.682872	0.494688
34377	eudicotyledons	SPECIATION	Pentapetalae	SPECIATION	0.228	False	0.167	0.061	0.142064	0.88703
46978	eudicotyledons	SPECIATION	Pentapetalae	SPECIATION	0.175	False	0.156	0.019	-0.128618	0.89766
47680	eudicotyledons	SPECIATION	Pentapetalae	SPECIATION	0.098	False	0.106	-0.008	-0.302628	0.762173
47489	eudicotyledons	SPECIATION	Pentapetalae	SPECIATION	0.102	False	0.12	-0.018	-0.367077	0.713562
44119	eudicotyledons	SPECIATION	Pentapetalae	SPECIATION	0.022	False	0.052	-0.03	-0.444414	0.656743
10585	eudicotyledons	SPECIATION	Pentapetalae	SPECIATION	0.056	False	0.052	0.004	-0.225291	0.821753
10585	eudicotyledons	SPECIATION	Pentapetalae	SPECIATION	0.026	False	0.052	-0.026	-0.418635	0.675483
10585	eudicotyledons	SPECIATION	Pentapetalae	SPECIATION	0.048	False	0.052	-0.004	-0.276849	0.781896
10585	eudicotyledons	SPECIATION	Pentapetalae	SPECIATION	0.049	False	0.052	-0.003	-0.270404	0.786849
10585	eudicotyledons	SPECIATION	Pentapetalae	SPECIATION	0.016	False	0.052	-0.036	-0.483083	0.629037
15351	eudicotyledons	SPECIATION	Pentapetalae	SPECIATION	0.069	False	0.047	0.022	-0.109284	0.912977
20275	eudicotyledons	SPECIATION	Pentapetalae	SPECIATION	0.111	False	0.064	0.047	0.0518362	0.958659
20275	eudicotyledons	SPECIATION	Pentapetalae	SPECIATION	0.058	False	0.064	-0.006	-0.289739	0.772016
20275	eudicotyledons	SPECIATION	Pentapetalae	SPECIATION	1.636	True	0.064	1.572	9.88017	0
20275	eudicotyledons	SPECIATION	Pentapetalae	SPECIATION	0.03	True	0.064	-0.034	-0.470194	0.638217
17598	eudicotyledons	SPECIATION	Pentapetalae	SPECIATION	0.174	False	0.137	0.037	-0.0126119	0.989937
24960	eudicotyledons	SPECIATION	Pentapetalae	SPECIATION	0	False	0.06	-0.06	-0.637759	0.523631
34128	eudicotyledons	SPECIATION	Pentapetalae	SPECIATION	0.1	False	0.066	0.034	-0.0319463	0.974515
47553	eudicotyledons	SPECIATION	Pentapetalae	SPECIATION	0.139	False	0.13	0.009	-0.193067	0.846907
13232	eudicotyledons	SPECIATION	Pentapetalae	SPECIATION	0.04	False	0.052	-0.012	-0.328408	0.742603
31276	eudicotyledons	SPECIATION	Pentapetalae	SPECIATION	0.141	False	0.114	0.027	-0.07706	0.938576
31276	eudicotyledons	SPECIATION	Pentapetalae	SPECIATION	0.243	False	0.114	0.129	0.580311	0.561705
11266	eudicotyledons	SPECIATION	Pentapetalae	SPECIATION	0.055	False	0.083	-0.028	-0.431525	0.666087
11266	eudicotyledons	SPECIATION	Pentapetalae	SPECIATION	0.228	True	0.083	0.145	0.683428	0.494337
11266	eudicotyledons	SPECIATION	Pentapetalae	SPECIATION	0.169	True	0.083	0.086	0.303184	0.76175
11266	eudicotyledons	SPECIATION	Pentapetalae	SPECIATION	0.075	True	0.083	-0.008	-0.302628	0.762173
11266	eudicotyledons	SPECIATION	Pentapetalae	SPECIATION	0.082	True	0.083	-0.001	-0.257515	0.796781
11266	eudicotyledons	SPECIATION	Pentapetalae	SPECIATION	0.174	False	0.083	0.091	0.335408	0.737317
11266	eudicotyledons	SPECIATION	Pentapetalae	SPECIATION	0.04	False	0.083	-0.043	-0.528197	0.597363
11266	eudicotyledons	SPECIATION	Pentapetalae	SPECIATION	0.12	False	0.083	0.037	-0.0126119	0.989937
11266	eudicotyledons	SPECIATION	Pentapetalae	SPECIATION	0.105	True	0.083	0.022	-0.109284	0.912977
11266	eudicotyledons	SPECIATION	Pentapetalae	SPECIATION	0.12	True	0.083	0.037	-0.0126119	0.989937
35513	eudicotyledons	SPECIATION	Pentapetalae	SPECIATION	0.102	False	0.109	-0.007	-0.296184	0.76709
47068	eudicotyledons	SPECIATION	Pentapetalae	SPECIATION	0.058	False	0.13	-0.072	-0.715096	0.474549
36381	eudicotyledons	SPECIATION	Pentapetalae	SPECIATION	0.265	False	0.297	-0.032	-0.457304	0.647453
46403	eudicotyledons	SPECIATION	Pentapetalae	SPECIATION	0.112	False	0.072	0.04	0.00672256	0.994636
22838	eudicotyledons	SPECIATION	Pentapetalae	SPECIATION	0.164	True	0.088	0.076	0.238736	0.81131
22838	eudicotyledons	SPECIATION	Pentapetalae	SPECIATION	0.118	True	0.088	0.03	-0.0577256	0.953967
22838	eudicotyledons	SPECIATION	Pentapetalae	SPECIATION	0.159	False	0.088	0.071	0.206512	0.836391
22838	eudicotyledons	SPECIATION	Pentapetalae	SPECIATION	0.114	False	0.088	0.026	-0.0835048	0.93345
11644	eudicotyledons	SPECIATION	Pentapetalae	SPECIATION	0.048	False	0.069	-0.021	-0.386411	0.699192
20854	eudicotyledons	SPECIATION	Pentapetalae	SPECIATION	0.025	False	0.07	-0.045	-0.541086	0.588448
20854	eudicotyledons	SPECIATION	Pentapetalae	SPECIATION	0.009	False	0.07	-0.061	-0.644203	0.519444
34271	eudicotyledons	SPECIATION	Pentapetalae	SPECIATION	0.376	False	0.371	0.005	-0.218846	0.82677
13061	eudicotyledons	SPECIATION	Pentapetalae	SPECIATION	0.085	True	0.053	0.032	-0.0448359	0.964238
13061	eudicotyledons	SPECIATION	Pentapetalae	SPECIATION	0.028	True	0.053	-0.025	-0.41219	0.6802
13061	eudicotyledons	SPECIATION	Pentapetalae	SPECIATION	0.044	False	0.053	-0.009	-0.309073	0.757266
11811	eudicotyledons	SPECIATION	Pentapetalae	SPECIATION	0.042	False	0.033	0.009	-0.193067	0.846907
11811	eudicotyledons	SPECIATION	Pentapetalae	SPECIATION	0	False	0.033	-0.033	-0.463749	0.642828
46852	eudicotyledons	SPECIATION	Pentapetalae	SPECIATION	0.1	True	0.055	0.045	0.0389466	0.968933
46852	eudicotyledons	SPECIATION	Pentapetalae	SPECIATION	0.1	True	0.055	0.045	0.0389466	0.968933
23327	eudicotyledons	SPECIATION	Pentapetalae	SPECIATION	0.147	False	0.105	0.042	0.0196122	0.984353
37237	eudicotyledons	SPECIATION	Pentapetalae	SPECIATION	0.113	False	0.145	-0.032	-0.457304	0.647453
44920	eudicotyledons	SPECIATION	Pentapetalae	SPECIATION	0.09	False	0.082	0.008	-0.199511	0.841863
14927	eudicotyledons	SPECIATION	Pentapetalae	SPECIATION	0.069	False	0.066	0.003	-0.231735	0.816743
13634	eudicotyledons	SPECIATION	Pentapetalae	SPECIATION	0.059	False	0.058	0.001	-0.244625	0.806747
12389	eudicotyledons	SPECIATION	Pentapetalae	SPECIATION	0.185	False	0.121	0.064	0.161398	0.87178
46313	eudicotyledons	SPECIATION	Pentapetalae	SPECIATION	0.062	False	0.048	0.014	-0.160843	0.872217
46313	eudicotyledons	SPECIATION	Pentapetalae	SPECIATION	0.051	False	0.048	0.003	-0.231735	0.816743
33142	eudicotyledons	SPECIATION	Pentapetalae	SPECIATION	0.179	False	0.196	-0.017	-0.360632	0.718375
33142	eudicotyledons	SPECIATION	Pentapetalae	SPECIATION	0.209	False	0.196	0.013	-0.167287	0.867144
33142	eudicotyledons	SPECIATION	Pentapetalae	SPECIATION	0.337	True	0.196	0.141	0.657649	0.510764
33142	eudicotyledons	SPECIATION	Pentapetalae	SPECIATION	0.136	True	0.196	-0.06	-0.637759	0.523631
33142	eudicotyledons	SPECIATION	Pentapetalae	SPECIATION	0.059	False	0.196	-0.137	-1.13401	0.256791
22974	eudicotyledons	SPECIATION	Pentapetalae	SPECIATION	0.091	False	0.081	0.01	-0.186622	0.851957
22974	eudicotyledons	SPECIATION	Pentapetalae	SPECIATION	0.099	False	0.081	0.018	-0.135063	0.892562
44307	eudicotyledons	SPECIATION	Pentapetalae	SPECIATION	0.032	False	0.055	-0.023	-0.399301	0.689672
34051	eudicotyledons	SPECIATION	Pentapetalae	SPECIATION	0.041	False	0.067	-0.026	-0.418635	0.675483
34051	eudicotyledons	SPECIATION	Pentapetalae	SPECIATION	0.054	False	0.067	-0.013	-0.334852	0.737736
23163	eudicotyledons	SPECIATION	Pentapetalae	SPECIATION	0.154	False	0.102	0.052	0.0840603	0.933008
23163	eudicotyledons	SPECIATION	Pentapetalae	SPECIATION	0.111	False	0.102	0.009	-0.193067	0.846907
33824	eudicotyledons	SPECIATION	Pentapetalae	SPECIATION	0.072	False	0.081	-0.009	-0.309073	0.757266
31559	eudicotyledons	SPECIATION	Pentapetalae	SPECIATION	0.022	False	0.059	-0.037	-0.489528	0.624468
23054	eudicotyledons	SPECIATION	Pentapetalae	SPECIATION	0.068	False	0.107	-0.039	-0.502418	0.615374
23054	eudicotyledons	SPECIATION	Pentapetalae	SPECIATION	0.07	False	0.107	-0.037	-0.489528	0.624468
23054	eudicotyledons	SPECIATION	Pentapetalae	SPECIATION	0.255	True	0.107	0.148	0.702762	0.482204
23054	eudicotyledons	SPECIATION	Pentapetalae	SPECIATION	0.126	True	0.107	0.019	-0.128618	0.89766
23054	eudicotyledons	SPECIATION	Pentapetalae	SPECIATION	0.199	False	0.107	0.092	0.341853	0.732462
31839	eudicotyledons	SPECIATION	Pentapetalae	SPECIATION	0.04	False	0.113	-0.073	-0.721541	0.470577
31839	eudicotyledons	SPECIATION	Pentapetalae	SPECIATION	0.034	False	0.113	-0.079	-0.76021	0.447129
45859	eudicotyledons	SPECIATION	Pentapetalae	SPECIATION	0.045	False	0.059	-0.014	-0.341297	0.73288
34455	eudicotyledons	SPECIATION	Pentapetalae	SPECIATION	0.131	False	0.101	0.03	-0.0577256	0.953967
11177	eudicotyledons	SPECIATION	Pentapetalae	SPECIATION	0.298	True	0.116	0.182	0.921886	0.356588
11177	eudicotyledons	SPECIATION	Pentapetalae	SPECIATION	0.235	True	0.116	0.119	0.515863	0.60595
11177	eudicotyledons	SPECIATION	Pentapetalae	SPECIATION	0.176	False	0.116	0.06	0.135619	0.892123
11177	eudicotyledons	SPECIATION	Pentapetalae	SPECIATION	0.112	False	0.116	-0.004	-0.276849	0.781896
10031	eudicotyledons	SPECIATION	Pentapetalae	SPECIATION	0	False	0.041	-0.041	-0.515307	0.606338
31326	eudicotyledons	SPECIATION	Pentapetalae	SPECIATION	0.153	False	0.085	0.068	0.187177	0.851522
31326	eudicotyledons	SPECIATION	Pentapetalae	SPECIATION	0.104	False	0.085	0.019	-0.128618	0.89766
43146	eudicotyledons	SPECIATION	Pentapetalae	SPECIATION	0.092	False	0.074	0.018	-0.135063	0.892562
47288	eudicotyledons	SPECIATION	Pentapetalae	SPECIATION	0.064	False	0.13	-0.066	-0.676427	0.498769
31558	eudicotyledons	SPECIATION	Pentapetalae	SPECIATION	0.19	True	0.097	0.093	0.348298	0.727617
31558	eudicotyledons	SPECIATION	Pentapetalae	SPECIATION	0.204	True	0.097	0.107	0.438525	0.661006
31558	eudicotyledons	SPECIATION	Pentapetalae	SPECIATION	0.197	True	0.097	0.1	0.393411	0.694016
31558	eudicotyledons	SPECIATION	Pentapetalae	SPECIATION	0.138	True	0.097	0.041	0.0131674	0.989494
34567	eudicotyledons	SPECIATION	Pentapetalae	SPECIATION	0.471	True	0.245	0.226	1.20546	0.228027
34567	eudicotyledons	SPECIATION	Pentapetalae	SPECIATION	0.27	True	0.245	0.025	-0.0899496	0.928327
13904	eudicotyledons	SPECIATION	Pentapetalae	SPECIATION	0.027	False	0.058	-0.031	-0.450859	0.652091
12547	eudicotyledons	SPECIATION	Pentapetalae	SPECIATION	0.324	False	0.101	0.223	1.18612	0.235574
12547	eudicotyledons	SPECIATION	Pentapetalae	SPECIATION	0.208	False	0.101	0.107	0.438525	0.661006
12547	eudicotyledons	SPECIATION	Pentapetalae	SPECIATION	0.041	False	0.101	-0.06	-0.637759	0.523631
12547	eudicotyledons	SPECIATION	Pentapetalae	SPECIATION	0.051	False	0.101	-0.05	-0.573311	0.566434
12547	eudicotyledons	SPECIATION	Pentapetalae	SPECIATION	0.09	False	0.101	-0.011	-0.321963	0.747481
12547	eudicotyledons	SPECIATION	Pentapetalae	SPECIATION	0.012	False	0.101	-0.089	-0.824658	0.409566
31902	eudicotyledons	SPECIATION	Pentapetalae	SPECIATION	0.069	False	0.083	-0.014	-0.341297	0.73288
31902	eudicotyledons	SPECIATION	Pentapetalae	SPECIATION	0.133	False	0.083	0.05	0.0711707	0.943262
13466	eudicotyledons	SPECIATION	Pentapetalae	SPECIATION	0.148	False	0.099	0.049	0.0647259	0.948392
12317	eudicotyledons	SPECIATION	Pentapetalae	SPECIATION	0.1	False	0.1	0	-0.25107	0.80176
10653	eudicotyledons	SPECIATION	Pentapetalae	SPECIATION	0.091	False	0.07	0.021	-0.115729	0.907867
12321	eudicotyledons	SPECIATION	Pentapetalae	SPECIATION	0.117	True	0.07	0.047	0.0518362	0.958659
12321	eudicotyledons	SPECIATION	Pentapetalae	SPECIATION	0.077	True	0.07	0.007	-0.205956	0.836825
12321	eudicotyledons	SPECIATION	Pentapetalae	SPECIATION	0.033	True	0.07	-0.037	-0.489528	0.624468
12321	eudicotyledons	SPECIATION	Pentapetalae	SPECIATION	0.033	True	0.07	-0.037	-0.489528	0.624468
12321	eudicotyledons	SPECIATION	Pentapetalae	SPECIATION	0.083	True	0.07	0.013	-0.167287	0.867144
12321	eudicotyledons	SPECIATION	Pentapetalae	SPECIATION	0.078	True	0.07	0.008	-0.199511	0.841863
16557	eudicotyledons	SPECIATION	Pentapetalae	SPECIATION	0.129	False	0.093	0.036	-0.0190567	0.984796
16557	eudicotyledons	SPECIATION	Pentapetalae	SPECIATION	0.092	False	0.093	-0.001	-0.257515	0.796781
15503	eudicotyledons	SPECIATION	Pentapetalae	SPECIATION	1.167	True	0.309	0.858	5.27858	1.3019e-07
15503	eudicotyledons	SPECIATION	Pentapetalae	SPECIATION	0.726	True	0.309	0.417	2.43642	0.0148336
15503	eudicotyledons	SPECIATION	Pentapetalae	SPECIATION	0.891	True	0.309	0.582	3.49981	0.000465589
13149	eudicotyledons	SPECIATION	Pentapetalae	SPECIATION	0.074	False	0.07	0.004	-0.225291	0.821753
47436	eudicotyledons	SPECIATION	Pentapetalae	SPECIATION	0.096	False	0.076	0.02	-0.122174	0.902761
10293	eudicotyledons	SPECIATION	Pentapetalae	SPECIATION	0.11	False	0.067	0.043	0.026057	0.979212
10293	eudicotyledons	SPECIATION	Pentapetalae	SPECIATION	0.076	False	0.067	0.009	-0.193067	0.846907
10293	eudicotyledons	SPECIATION	Pentapetalae	SPECIATION	0.041	False	0.067	-0.026	-0.418635	0.675483
47968	eudicotyledons	SPECIATION	Pentapetalae	SPECIATION	0.037	False	0.087	-0.05	-0.573311	0.566434
47968	eudicotyledons	SPECIATION	Pentapetalae	SPECIATION	0.065	False	0.087	-0.022	-0.392856	0.694426
47968	eudicotyledons	SPECIATION	Pentapetalae	SPECIATION	0.165	True	0.087	0.078	0.251625	0.801331
47968	eudicotyledons	SPECIATION	Pentapetalae	SPECIATION	0.158	True	0.087	0.071	0.206512	0.836391
47968	eudicotyledons	SPECIATION	Pentapetalae	SPECIATION	0.083	False	0.087	-0.004	-0.276849	0.781896
47968	eudicotyledons	SPECIATION	Pentapetalae	SPECIATION	0.136	False	0.087	0.049	0.0647259	0.948392
47968	eudicotyledons	SPECIATION	Pentapetalae	SPECIATION	0.098	False	0.087	0.011	-0.180177	0.857014
47968	eudicotyledons	SPECIATION	Pentapetalae	SPECIATION	0.059	False	0.087	-0.028	-0.431525	0.666087
47968	eudicotyledons	SPECIATION	Pentapetalae	SPECIATION	0.034	False	0.087	-0.053	-0.592645	0.553419
47968	eudicotyledons	SPECIATION	Pentapetalae	SPECIATION	0.054	False	0.087	-0.033	-0.463749	0.642828
47968	eudicotyledons	SPECIATION	Pentapetalae	SPECIATION	0.081	False	0.087	-0.006	-0.289739	0.772016
47968	eudicotyledons	SPECIATION	Pentapetalae	SPECIATION	0.094	False	0.087	0.007	-0.205956	0.836825
47968	eudicotyledons	SPECIATION	Pentapetalae	SPECIATION	0.09	False	0.087	0.003	-0.231735	0.816743
33491	eudicotyledons	SPECIATION	Pentapetalae	SPECIATION	0.352	True	0.376	-0.024	-0.405745	0.68493
33491	eudicotyledons	SPECIATION	Pentapetalae	SPECIATION	0.162	True	0.376	-0.214	-1.63026	0.103047
36617	eudicotyledons	SPECIATION	Pentapetalae	SPECIATION	0.05	False	0.381	-0.331	-2.3843	0.0171115
22911	eudicotyledons	SPECIATION	Pentapetalae	SPECIATION	0.152	False	0.1	0.052	0.0840603	0.933008
11606	eudicotyledons	SPECIATION	Pentapetalae	SPECIATION	0.021	False	0.041	-0.02	-0.379966	0.703971
11606	eudicotyledons	SPECIATION	Pentapetalae	SPECIATION	0.059	False	0.041	0.018	-0.135063	0.892562
10606	eudicotyledons	SPECIATION	Pentapetalae	SPECIATION	0.02	False	0.051	-0.031	-0.450859	0.652091
11711	eudicotyledons	SPECIATION	Pentapetalae	SPECIATION	0.024	False	0.042	-0.018	-0.367077	0.713562
11711	eudicotyledons	SPECIATION	Pentapetalae	SPECIATION	0.018	False	0.042	-0.024	-0.405745	0.68493
11711	eudicotyledons	SPECIATION	Pentapetalae	SPECIATION	0.139	True	0.042	0.097	0.374077	0.708347
11711	eudicotyledons	SPECIATION	Pentapetalae	SPECIATION	0.042	True	0.042	-1.04083e-16	-0.25107	0.80176
11711	eudicotyledons	SPECIATION	Pentapetalae	SPECIATION	0	False	0.042	-0.042	-0.521752	0.601843
11711	eudicotyledons	SPECIATION	Pentapetalae	SPECIATION	0.006	True	0.042	-0.036	-0.483083	0.629037
11711	eudicotyledons	SPECIATION	Pentapetalae	SPECIATION	0	True	0.042	-0.042	-0.521752	0.601843
11711	eudicotyledons	SPECIATION	Pentapetalae	SPECIATION	0	True	0.042	-0.042	-0.521752	0.601843
11711	eudicotyledons	SPECIATION	Pentapetalae	SPECIATION	0	True	0.042	-0.042	-0.521752	0.601843
11711	eudicotyledons	SPECIATION	Pentapetalae	SPECIATION	0.03	False	0.042	-0.012	-0.328408	0.742603
33159	eudicotyledons	SPECIATION	Pentapetalae	SPECIATION	0.106	False	0.136	-0.03	-0.444414	0.656743
33159	eudicotyledons	SPECIATION	Pentapetalae	SPECIATION	0.2	True	0.136	0.064	0.161398	0.87178
33159	eudicotyledons	SPECIATION	Pentapetalae	SPECIATION	0.235	True	0.136	0.099	0.386966	0.698781
33159	eudicotyledons	SPECIATION	Pentapetalae	SPECIATION	0.179	True	0.136	0.043	0.026057	0.979212
33159	eudicotyledons	SPECIATION	Pentapetalae	SPECIATION	0.137	True	0.136	0.001	-0.244625	0.806747
35462	eudicotyledons	SPECIATION	Pentapetalae	SPECIATION	0.34	False	0.113	0.227	1.2119	0.22555
34961	eudicotyledons	SPECIATION	Pentapetalae	SPECIATION	0.797	True	0.332	0.465	2.74577	0.00603695
34961	eudicotyledons	SPECIATION	Pentapetalae	SPECIATION	0.221	True	0.332	-0.111	-0.966444	0.333822
33162	eudicotyledons	SPECIATION	Pentapetalae	SPECIATION	0.068	False	0.068	0	-0.25107	0.80176
33162	eudicotyledons	SPECIATION	Pentapetalae	SPECIATION	0.101	False	0.068	0.033	-0.0383911	0.969376
13544	eudicotyledons	SPECIATION	Pentapetalae	SPECIATION	0.118	False	0.078	0.04	0.00672256	0.994636
43979	eudicotyledons	SPECIATION	Pentapetalae	SPECIATION	0.032	False	0.049	-0.017	-0.360632	0.718375
45675	eudicotyledons	SPECIATION	Pentapetalae	SPECIATION	0.121	True	0.06	0.061	0.142064	0.88703
45675	eudicotyledons	SPECIATION	Pentapetalae	SPECIATION	0.104	True	0.06	0.044	0.0325018	0.974072
45675	eudicotyledons	SPECIATION	Pentapetalae	SPECIATION	0.052	False	0.06	-0.008	-0.302628	0.762173
45675	eudicotyledons	SPECIATION	Pentapetalae	SPECIATION	0.062	False	0.06	0.002	-0.23818	0.811741
45675	eudicotyledons	SPECIATION	Pentapetalae	SPECIATION	0.349	True	0.06	0.289	1.61148	0.107075
45675	eudicotyledons	SPECIATION	Pentapetalae	SPECIATION	0.017	True	0.06	-0.043	-0.528197	0.597363
45675	eudicotyledons	SPECIATION	Pentapetalae	SPECIATION	0.215	True	0.06	0.155	0.747876	0.454535
45675	eudicotyledons	SPECIATION	Pentapetalae	SPECIATION	0.316	True	0.06	0.256	1.3988	0.161872
45675	eudicotyledons	SPECIATION	Pentapetalae	SPECIATION	0.057	True	0.06	-0.003	-0.270404	0.786849
33925	eudicotyledons	SPECIATION	Pentapetalae	SPECIATION	0.097	False	0.099	-0.002	-0.26396	0.791811
33925	eudicotyledons	SPECIATION	Pentapetalae	SPECIATION	0.128	False	0.099	0.029	-0.0641704	0.948835
12124	eudicotyledons	SPECIATION	Pentapetalae	SPECIATION	0.093	False	0.094	-0.001	-0.257515	0.796781
12124	eudicotyledons	SPECIATION	Pentapetalae	SPECIATION	0.111	False	0.094	0.017	-0.141508	0.887469
15224	eudicotyledons	SPECIATION	Pentapetalae	SPECIATION	0.027	False	0.068	-0.041	-0.515307	0.606338
47987	eudicotyledons	SPECIATION	Pentapetalae	SPECIATION	0.124	False	0.09	0.034	-0.0319463	0.974515
47987	eudicotyledons	SPECIATION	Pentapetalae	SPECIATION	0.123	False	0.09	0.033	-0.0383911	0.969376
47987	eudicotyledons	SPECIATION	Pentapetalae	SPECIATION	0.152	False	0.09	0.062	0.148508	0.881942
47987	eudicotyledons	SPECIATION	Pentapetalae	SPECIATION	0.209	True	0.09	0.119	0.515863	0.60595
47987	eudicotyledons	SPECIATION	Pentapetalae	SPECIATION	0.217	True	0.09	0.127	0.567421	0.570428
47987	eudicotyledons	SPECIATION	Pentapetalae	SPECIATION	0.186	True	0.09	0.096	0.367632	0.713148
47987	eudicotyledons	SPECIATION	Pentapetalae	SPECIATION	0.091	False	0.09	0.001	-0.244625	0.806747
15544	eudicotyledons	SPECIATION	Pentapetalae	SPECIATION	0.063	False	0.101	-0.038	-0.495973	0.619914
35740	eudicotyledons	SPECIATION	Pentapetalae	SPECIATION	0.268	False	0.317	-0.049	-0.566866	0.570805
34467	eudicotyledons	SPECIATION	Pentapetalae	SPECIATION	0.321	False	0.256	0.065	0.167843	0.866707
31801	eudicotyledons	SPECIATION	Pentapetalae	SPECIATION	0.118	False	0.076	0.042	0.0196122	0.984353
46666	eudicotyledons	SPECIATION	Pentapetalae	SPECIATION	0.036	False	0.102	-0.066	-0.676427	0.498769
43692	eudicotyledons	SPECIATION	Pentapetalae	SPECIATION	0.141	False	0.065	0.076	0.238736	0.81131
12937	eudicotyledons	SPECIATION	Pentapetalae	SPECIATION	0.037	False	0.049	-0.012	-0.328408	0.742603
16469	eudicotyledons	SPECIATION	Pentapetalae	SPECIATION	0.072	False	0.106	-0.034	-0.470194	0.638217
31425	eudicotyledons	SPECIATION	Pentapetalae	SPECIATION	0.076	False	0.067	0.009	-0.193067	0.846907
31425	eudicotyledons	SPECIATION	Pentapetalae	SPECIATION	0.062	False	0.067	-0.005	-0.283294	0.776951
31425	eudicotyledons	SPECIATION	Pentapetalae	SPECIATION	0.093	False	0.067	0.026	-0.0835048	0.93345
31425	eudicotyledons	SPECIATION	Pentapetalae	SPECIATION	0.077	False	0.067	0.01	-0.186622	0.851957
31425	eudicotyledons	SPECIATION	Pentapetalae	SPECIATION	0.087	False	0.067	0.02	-0.122174	0.902761
31425	eudicotyledons	SPECIATION	Pentapetalae	SPECIATION	0.048	False	0.067	-0.019	-0.373521	0.70876
31425	eudicotyledons	SPECIATION	Pentapetalae	SPECIATION	0.047	False	0.067	-0.02	-0.379966	0.703971
31425	eudicotyledons	SPECIATION	Pentapetalae	SPECIATION	0.076	False	0.067	0.009	-0.193067	0.846907
31425	eudicotyledons	SPECIATION	Pentapetalae	SPECIATION	0.115	True	0.067	0.048	0.0582811	0.953525
31425	eudicotyledons	SPECIATION	Pentapetalae	SPECIATION	0.07	True	0.067	0.003	-0.231735	0.816743
36764	eudicotyledons	SPECIATION	Pentapetalae	SPECIATION	0.255	False	0.156	0.099	0.386966	0.698781
12812	eudicotyledons	SPECIATION	Pentapetalae	SPECIATION	0.126	False	0.075	0.051	0.0776155	0.938134
46179	eudicotyledons	SPECIATION	Pentapetalae	SPECIATION	0.089	False	0.133	-0.044	-0.534642	0.592898
45766	eudicotyledons	SPECIATION	Pentapetalae	SPECIATION	0.066	False	0.07	-0.004	-0.276849	0.781896
45766	eudicotyledons	SPECIATION	Pentapetalae	SPECIATION	0.034	False	0.07	-0.036	-0.483083	0.629037
33333	eudicotyledons	SPECIATION	Pentapetalae	SPECIATION	0.099	False	0.266	-0.167	-1.32735	0.184392
33730	eudicotyledons	SPECIATION	Pentapetalae	SPECIATION	0.713	True	0.17	0.543	3.24846	0.0011603
33730	eudicotyledons	SPECIATION	Pentapetalae	SPECIATION	0.19	True	0.17	0.02	-0.122174	0.902761
36011	eudicotyledons	SPECIATION	Pentapetalae	SPECIATION	0.12	False	0.097	0.023	-0.102839	0.918091
43184	eudicotyledons	SPECIATION	Pentapetalae	SPECIATION	0.034	False	0.062	-0.028	-0.431525	0.666087
43184	eudicotyledons	SPECIATION	Pentapetalae	SPECIATION	0.095	False	0.062	0.033	-0.0383911	0.969376
43184	eudicotyledons	SPECIATION	Pentapetalae	SPECIATION	0.039	False	0.062	-0.023	-0.399301	0.689672
34044	eudicotyledons	SPECIATION	Pentapetalae	SPECIATION	0.074	False	0.059	0.015	-0.154398	0.877296
31391	eudicotyledons	SPECIATION	Pentapetalae	SPECIATION	0.116	False	0.226	-0.11	-0.959999	0.337056
31391	eudicotyledons	SPECIATION	Pentapetalae	SPECIATION	0.335	False	0.226	0.109	0.451415	0.651691
31391	eudicotyledons	SPECIATION	Pentapetalae	SPECIATION	0.277	False	0.226	0.051	0.0776155	0.938134
31391	eudicotyledons	SPECIATION	Pentapetalae	SPECIATION	0.303	False	0.226	0.077	0.245181	0.806317
31391	eudicotyledons	SPECIATION	Pentapetalae	SPECIATION	0.272	False	0.226	0.046	0.0453914	0.963795
31391	eudicotyledons	SPECIATION	Pentapetalae	SPECIATION	0.114	False	0.226	-0.112	-0.972889	0.330609
31391	eudicotyledons	SPECIATION	Pentapetalae	SPECIATION	0.37	True	0.226	0.144	0.676983	0.498417
31391	eudicotyledons	SPECIATION	Pentapetalae	SPECIATION	0.291	True	0.226	0.065	0.167843	0.866707
31391	eudicotyledons	SPECIATION	Pentapetalae	SPECIATION	0.303	True	0.226	0.077	0.245181	0.806317
31391	eudicotyledons	SPECIATION	Pentapetalae	SPECIATION	0.262	True	0.226	0.036	-0.0190567	0.984796
31391	eudicotyledons	SPECIATION	Pentapetalae	SPECIATION	0.143	True	0.226	-0.083	-0.785989	0.431874
31956	eudicotyledons	SPECIATION	Pentapetalae	SPECIATION	0.049	False	0.067	-0.018	-0.367077	0.713562
31956	eudicotyledons	SPECIATION	Pentapetalae	SPECIATION	0.045	False	0.067	-0.022	-0.392856	0.694426
31956	eudicotyledons	SPECIATION	Pentapetalae	SPECIATION	0.015	False	0.067	-0.052	-0.5862	0.557741
31956	eudicotyledons	SPECIATION	Pentapetalae	SPECIATION	0.049	False	0.067	-0.018	-0.367077	0.713562
10134	eudicotyledons	SPECIATION	Pentapetalae	SPECIATION	0.053	False	0.059	-0.006	-0.289739	0.772016
10134	eudicotyledons	SPECIATION	Pentapetalae	SPECIATION	0.06	True	0.059	0.001	-0.244625	0.806747
10134	eudicotyledons	SPECIATION	Pentapetalae	SPECIATION	0.024	True	0.059	-0.035	-0.476638	0.63362
31496	eudicotyledons	SPECIATION	Pentapetalae	SPECIATION	0.029	False	0.105	-0.076	-0.740876	0.458769
31496	eudicotyledons	SPECIATION	Pentapetalae	SPECIATION	0.017	False	0.105	-0.088	-0.818213	0.413235
13451	eudicotyledons	SPECIATION	Pentapetalae	SPECIATION	0.104	False	0.125	-0.021	-0.386411	0.699192
35694	eudicotyledons	SPECIATION	Pentapetalae	SPECIATION	0.15	False	0.148	0.002	-0.23818	0.811741
33138	eudicotyledons	SPECIATION	Pentapetalae	SPECIATION	0.069	False	0.319	-0.25	-1.86227	0.0625646
33138	eudicotyledons	SPECIATION	Pentapetalae	SPECIATION	0.713	True	0.319	0.394	2.28819	0.0221267
33138	eudicotyledons	SPECIATION	Pentapetalae	SPECIATION	0.912	True	0.319	0.593	3.5707	0.000356024
33138	eudicotyledons	SPECIATION	Pentapetalae	SPECIATION	0.833	True	0.319	0.514	3.06156	0.00220184
33138	eudicotyledons	SPECIATION	Pentapetalae	SPECIATION	0.404	True	0.319	0.085	0.296739	0.766666
33138	eudicotyledons	SPECIATION	Pentapetalae	SPECIATION	0.112	False	0.319	-0.207	-1.58515	0.112933
31652	eudicotyledons	SPECIATION	Pentapetalae	SPECIATION	0.018	False	0.073	-0.055	-0.605535	0.544824
35718	eudicotyledons	SPECIATION	Pentapetalae	SPECIATION	0.277	False	0.198	0.079	0.25807	0.796353
43345	eudicotyledons	SPECIATION	Pentapetalae	SPECIATION	0.084	False	0.046	0.038	-0.00616706	0.995079
15004	eudicotyledons	SPECIATION	Pentapetalae	SPECIATION	0.057	False	0.084	-0.027	-0.42508	0.670778
47453	eudicotyledons	SPECIATION	Pentapetalae	SPECIATION	0.103	False	0.07	0.033	-0.0383911	0.969376
12645	eudicotyledons	SPECIATION	Pentapetalae	SPECIATION	0.185	False	0.069	0.116	0.496528	0.619522
48321	eudicotyledons	SPECIATION	Pentapetalae	SPECIATION	0.156	False	0.113	0.043	0.026057	0.979212
45090	eudicotyledons	SPECIATION	Pentapetalae	SPECIATION	0.087	False	0.142	-0.055	-0.605535	0.544824
43180	eudicotyledons	SPECIATION	Pentapetalae	SPECIATION	0.067	False	0.097	-0.03	-0.444414	0.656743
43180	eudicotyledons	SPECIATION	Pentapetalae	SPECIATION	0.087	False	0.097	-0.01	-0.315518	0.752368
43180	eudicotyledons	SPECIATION	Pentapetalae	SPECIATION	0.063	False	0.097	-0.034	-0.470194	0.638217
43180	eudicotyledons	SPECIATION	Pentapetalae	SPECIATION	0.099	False	0.097	0.002	-0.23818	0.811741
43180	eudicotyledons	SPECIATION	Pentapetalae	SPECIATION	0.039	False	0.097	-0.058	-0.624869	0.532057
43180	eudicotyledons	SPECIATION	Pentapetalae	SPECIATION	0.171	False	0.097	0.074	0.225846	0.821321
43180	eudicotyledons	SPECIATION	Pentapetalae	SPECIATION	0.074	False	0.097	-0.023	-0.399301	0.689672
31851	eudicotyledons	SPECIATION	Pentapetalae	SPECIATION	0.248	True	0.09	0.158	0.76721	0.442956
31851	eudicotyledons	SPECIATION	Pentapetalae	SPECIATION	0.163	True	0.09	0.073	0.219401	0.826337
31851	eudicotyledons	SPECIATION	Pentapetalae	SPECIATION	0.112	True	0.09	0.022	-0.109284	0.912977
31851	eudicotyledons	SPECIATION	Pentapetalae	SPECIATION	0.039	False	0.09	-0.051	-0.579755	0.56208
31851	eudicotyledons	SPECIATION	Pentapetalae	SPECIATION	0.191	False	0.09	0.101	0.399856	0.689263
45709	eudicotyledons	SPECIATION	Pentapetalae	SPECIATION	0.064	False	0.055	0.009	-0.193067	0.846907
36375	eudicotyledons	SPECIATION	Pentapetalae	SPECIATION	0.085	False	0.072	0.013	-0.167287	0.867144
10416	eudicotyledons	SPECIATION	Pentapetalae	SPECIATION	0.063	False	0.071	-0.008	-0.302628	0.762173
46761	eudicotyledons	SPECIATION	Pentapetalae	SPECIATION	0.121	True	0.089	0.032	-0.0448359	0.964238
46761	eudicotyledons	SPECIATION	Pentapetalae	SPECIATION	0.121	True	0.089	0.032	-0.0448359	0.964238
12560	eudicotyledons	SPECIATION	Pentapetalae	SPECIATION	0.078	False	0.084	-0.006	-0.289739	0.772016
12560	eudicotyledons	SPECIATION	Pentapetalae	SPECIATION	0.045	False	0.084	-0.039	-0.502418	0.615374
26379	eudicotyledons	SPECIATION	Pentapetalae	SPECIATION	0.067	False	0.218	-0.151	-1.22424	0.220863
26379	eudicotyledons	SPECIATION	Pentapetalae	SPECIATION	0.096	True	0.218	-0.122	-1.03734	0.299579
26379	eudicotyledons	SPECIATION	Pentapetalae	SPECIATION	0.078	True	0.218	-0.14	-1.15334	0.248769
26379	eudicotyledons	SPECIATION	Pentapetalae	SPECIATION	0.097	True	0.218	-0.121	-1.03089	0.302591
26379	eudicotyledons	SPECIATION	Pentapetalae	SPECIATION	0.055	True	0.218	-0.163	-1.30157	0.193062
24078	eudicotyledons	SPECIATION	Pentapetalae	SPECIATION	0.248	True	0.071	0.177	0.889662	0.373648
24078	eudicotyledons	SPECIATION	Pentapetalae	SPECIATION	0.29	True	0.071	0.219	1.16034	0.245909
24078	eudicotyledons	SPECIATION	Pentapetalae	SPECIATION	0.189	True	0.071	0.118	0.509418	0.610459
24078	eudicotyledons	SPECIATION	Pentapetalae	SPECIATION	0.196	True	0.071	0.125	0.554532	0.579215
24078	eudicotyledons	SPECIATION	Pentapetalae	SPECIATION	0.105	False	0.071	0.034	-0.0319463	0.974515
24078	eudicotyledons	SPECIATION	Pentapetalae	SPECIATION	0.058	False	0.071	-0.013	-0.334852	0.737736
24078	eudicotyledons	SPECIATION	Pentapetalae	SPECIATION	0.023	False	0.071	-0.048	-0.560421	0.575192
10231	eudicotyledons	SPECIATION	Pentapetalae	SPECIATION	0.075	False	0.059	0.016	-0.147953	0.88238
10231	eudicotyledons	SPECIATION	Pentapetalae	SPECIATION	0.026	False	0.059	-0.033	-0.463749	0.642828
10231	eudicotyledons	SPECIATION	Pentapetalae	SPECIATION	0.041	False	0.059	-0.018	-0.367077	0.713562
10231	eudicotyledons	SPECIATION	Pentapetalae	SPECIATION	0.047	False	0.059	-0.012	-0.328408	0.742603
33603	eudicotyledons	SPECIATION	Pentapetalae	SPECIATION	0.174	False	0.054	0.12	0.522308	0.601456
13134	eudicotyledons	SPECIATION	Pentapetalae	SPECIATION	0.089	False	0.081	0.008	-0.199511	0.841863
23061	eudicotyledons	SPECIATION	Pentapetalae	SPECIATION	0.132	False	0.095	0.037	-0.0126119	0.989937
19876	eudicotyledons	SPECIATION	Pentapetalae	SPECIATION	0.018	True	0.063	-0.045	-0.541086	0.588448
19876	eudicotyledons	SPECIATION	Pentapetalae	SPECIATION	0.014	True	0.063	-0.049	-0.566866	0.570805
19876	eudicotyledons	SPECIATION	Pentapetalae	SPECIATION	0.361	True	0.063	0.298	1.66948	0.0950215
19876	eudicotyledons	SPECIATION	Pentapetalae	SPECIATION	0.016	True	0.063	-0.047	-0.553976	0.579595
12029	eudicotyledons	SPECIATION	Pentapetalae	SPECIATION	0.119	False	0.122	-0.003	-0.270404	0.786849
12964	eudicotyledons	SPECIATION	Pentapetalae	SPECIATION	0.085	False	0.073	0.012	-0.173732	0.862076
35549	eudicotyledons	SPECIATION	Pentapetalae	SPECIATION	0.141	False	0.133	0.008	-0.199511	0.841863
35549	eudicotyledons	SPECIATION	Pentapetalae	SPECIATION	0.212	False	0.133	0.079	0.25807	0.796353
35549	eudicotyledons	SPECIATION	Pentapetalae	SPECIATION	0.168	False	0.133	0.035	-0.0255015	0.979655
11885	eudicotyledons	SPECIATION	Pentapetalae	SPECIATION	0.02	False	0.027	-0.007	-0.296184	0.76709
31115	eudicotyledons	SPECIATION	Pentapetalae	SPECIATION	0.148	False	0.133	0.015	-0.154398	0.877296
31115	eudicotyledons	SPECIATION	Pentapetalae	SPECIATION	0.317	True	0.133	0.184	0.934775	0.349904
31115	eudicotyledons	SPECIATION	Pentapetalae	SPECIATION	0.265	True	0.133	0.132	0.599645	0.548743
10073	eudicotyledons	SPECIATION	Pentapetalae	SPECIATION	0.086	False	0.085	0.001	-0.244625	0.806747
10073	eudicotyledons	SPECIATION	Pentapetalae	SPECIATION	0.13	False	0.085	0.045	0.0389466	0.968933
10073	eudicotyledons	SPECIATION	Pentapetalae	SPECIATION	0.093	False	0.085	0.008	-0.199511	0.841863
35989	eudicotyledons	SPECIATION	Pentapetalae	SPECIATION	0.047	False	0.111	-0.064	-0.663538	0.506986
36366	eudicotyledons	SPECIATION	Pentapetalae	SPECIATION	0.151	False	0.175	-0.024	-0.405745	0.68493
46204	eudicotyledons	SPECIATION	Pentapetalae	SPECIATION	0.038	False	0.088	-0.05	-0.573311	0.566434
46204	eudicotyledons	SPECIATION	Pentapetalae	SPECIATION	0.075	True	0.088	-0.013	-0.334852	0.737736
46204	eudicotyledons	SPECIATION	Pentapetalae	SPECIATION	0.062	True	0.088	-0.026	-0.418635	0.675483
32254	eudicotyledons	SPECIATION	Pentapetalae	SPECIATION	0.293	False	0.113	0.18	0.908996	0.363352
32254	eudicotyledons	SPECIATION	Pentapetalae	SPECIATION	0.131	False	0.113	0.018	-0.135063	0.892562
32254	eudicotyledons	SPECIATION	Pentapetalae	SPECIATION	0.082	False	0.113	-0.031	-0.450859	0.652091
32254	eudicotyledons	SPECIATION	Pentapetalae	SPECIATION	0.222	False	0.113	0.109	0.451415	0.651691
31722	eudicotyledons	SPECIATION	Pentapetalae	SPECIATION	0.186	True	0.115	0.071	0.206512	0.836391
31722	eudicotyledons	SPECIATION	Pentapetalae	SPECIATION	0.109	True	0.115	-0.006	-0.289739	0.772016
31722	eudicotyledons	SPECIATION	Pentapetalae	SPECIATION	0.282	True	0.115	0.167	0.825214	0.40925
31722	eudicotyledons	SPECIATION	Pentapetalae	SPECIATION	0.13	True	0.115	0.015	-0.154398	0.877296
31722	eudicotyledons	SPECIATION	Pentapetalae	SPECIATION	0.082	False	0.115	-0.033	-0.463749	0.642828
31722	eudicotyledons	SPECIATION	Pentapetalae	SPECIATION	0.025	False	0.115	-0.09	-0.831103	0.405915
21162	eudicotyledons	SPECIATION	Pentapetalae	SPECIATION	0.082	False	0.085	-0.003	-0.270404	0.786849
20208	eudicotyledons	SPECIATION	Pentapetalae	SPECIATION	0.042	False	0.093	-0.051	-0.579755	0.56208
20208	eudicotyledons	SPECIATION	Pentapetalae	SPECIATION	0.094	False	0.093	0.001	-0.244625	0.806747
34123	eudicotyledons	SPECIATION	Pentapetalae	SPECIATION	0.107	False	0.09	0.017	-0.141508	0.887469
34123	eudicotyledons	SPECIATION	Pentapetalae	SPECIATION	0.032	False	0.09	-0.058	-0.624869	0.532057
45288	eudicotyledons	SPECIATION	Pentapetalae	SPECIATION	0.105	False	0.087	0.018	-0.135063	0.892562
45288	eudicotyledons	SPECIATION	Pentapetalae	SPECIATION	0.052	False	0.087	-0.035	-0.476638	0.63362
22597	eudicotyledons	SPECIATION	Pentapetalae	SPECIATION	0.148	False	0.109	0.039	0.000277753	0.999778
22597	eudicotyledons	SPECIATION	Pentapetalae	SPECIATION	0.103	False	0.109	-0.006	-0.289739	0.772016
45755	eudicotyledons	SPECIATION	Pentapetalae	SPECIATION	0.063	False	0.06	0.003	-0.231735	0.816743
45755	eudicotyledons	SPECIATION	Pentapetalae	SPECIATION	0.04	False	0.06	-0.02	-0.379966	0.703971
34966	eudicotyledons	SPECIATION	Pentapetalae	SPECIATION	0.05	False	0.091	-0.041	-0.515307	0.606338
33445	eudicotyledons	SPECIATION	Pentapetalae	SPECIATION	0.103	False	0.068	0.035	-0.0255015	0.979655
11670	eudicotyledons	SPECIATION	Pentapetalae	SPECIATION	0.017	False	0.033	-0.016	-0.354187	0.723199
11670	eudicotyledons	SPECIATION	Pentapetalae	SPECIATION	0.02	False	0.033	-0.013	-0.334852	0.737736
13620	eudicotyledons	SPECIATION	Pentapetalae	SPECIATION	0.1	False	0.223	-0.123	-1.04378	0.296586
13620	eudicotyledons	SPECIATION	Pentapetalae	SPECIATION	0.172	False	0.223	-0.051	-0.579755	0.56208
13620	eudicotyledons	SPECIATION	Pentapetalae	SPECIATION	0.527	False	0.223	0.304	1.70815	0.087608
13620	eudicotyledons	SPECIATION	Pentapetalae	SPECIATION	0.33	True	0.223	0.107	0.438525	0.661006
13620	eudicotyledons	SPECIATION	Pentapetalae	SPECIATION	0.871	True	0.223	0.648	3.92517	8.66692e-05
13620	eudicotyledons	SPECIATION	Pentapetalae	SPECIATION	0.124	True	0.223	-0.099	-0.889106	0.373946
13620	eudicotyledons	SPECIATION	Pentapetalae	SPECIATION	0.086	False	0.223	-0.137	-1.13401	0.256791
13620	eudicotyledons	SPECIATION	Pentapetalae	SPECIATION	0.387	False	0.223	0.164	0.805879	0.420312
34058	eudicotyledons	SPECIATION	Pentapetalae	SPECIATION	0.026	False	0.034	-0.008	-0.302628	0.762173
46336	eudicotyledons	SPECIATION	Pentapetalae	SPECIATION	0.036	False	0.147	-0.111	-0.966444	0.333822
10552	eudicotyledons	SPECIATION	Pentapetalae	SPECIATION	0.056	False	0.086	-0.03	-0.444414	0.656743
22938	eudicotyledons	SPECIATION	Pentapetalae	SPECIATION	0.068	False	0.112	-0.044	-0.534642	0.592898
11655	eudicotyledons	SPECIATION	Pentapetalae	SPECIATION	0.014	False	0.044	-0.03	-0.444414	0.656743
11655	eudicotyledons	SPECIATION	Pentapetalae	SPECIATION	0.022	False	0.044	-0.022	-0.392856	0.694426
11655	eudicotyledons	SPECIATION	Pentapetalae	SPECIATION	0.07	False	0.044	0.026	-0.0835048	0.93345
34955	eudicotyledons	SPECIATION	Pentapetalae	SPECIATION	0.106	False	0.125	-0.019	-0.373521	0.70876
48099	eudicotyledons	SPECIATION	Pentapetalae	SPECIATION	0.265	True	0.057	0.208	1.08945	0.275955
48099	eudicotyledons	SPECIATION	Pentapetalae	SPECIATION	0.11	True	0.057	0.053	0.0905051	0.927886
48099	eudicotyledons	SPECIATION	Pentapetalae	SPECIATION	0.046	False	0.057	-0.011	-0.321963	0.747481
48099	eudicotyledons	SPECIATION	Pentapetalae	SPECIATION	0.046	False	0.057	-0.011	-0.321963	0.747481
48014	eudicotyledons	SPECIATION	Pentapetalae	SPECIATION	0.081	False	0.072	0.009	-0.193067	0.846907
48014	eudicotyledons	SPECIATION	Pentapetalae	SPECIATION	0.076	False	0.072	0.004	-0.225291	0.821753
48014	eudicotyledons	SPECIATION	Pentapetalae	SPECIATION	0.028	False	0.072	-0.044	-0.534642	0.592898
48014	eudicotyledons	SPECIATION	Pentapetalae	SPECIATION	0.021	False	0.072	-0.051	-0.579755	0.56208
31711	eudicotyledons	SPECIATION	Pentapetalae	SPECIATION	0.196	True	0.067	0.129	0.580311	0.561705
31711	eudicotyledons	SPECIATION	Pentapetalae	SPECIATION	0.089	True	0.067	0.022	-0.109284	0.912977
44090	eudicotyledons	SPECIATION	Pentapetalae	SPECIATION	0.029	False	0.079	-0.05	-0.573311	0.566434
36073	eudicotyledons	SPECIATION	Pentapetalae	SPECIATION	0.147	False	0.176	-0.029	-0.437969	0.661408
32227	eudicotyledons	SPECIATION	Pentapetalae	SPECIATION	0.155	False	0.097	0.058	0.122729	0.902322
32227	eudicotyledons	SPECIATION	Pentapetalae	SPECIATION	0.534	True	0.097	0.437	2.56531	0.0103083
32227	eudicotyledons	SPECIATION	Pentapetalae	SPECIATION	0.496	True	0.097	0.399	2.32041	0.0203187
32227	eudicotyledons	SPECIATION	Pentapetalae	SPECIATION	0.321	True	0.097	0.224	1.19257	0.233039
32227	eudicotyledons	SPECIATION	Pentapetalae	SPECIATION	0.213	False	0.097	0.116	0.496528	0.619522
32227	eudicotyledons	SPECIATION	Pentapetalae	SPECIATION	0.014	False	0.097	-0.083	-0.785989	0.431874
32227	eudicotyledons	SPECIATION	Pentapetalae	SPECIATION	0.059	False	0.097	-0.038	-0.495973	0.619914
32227	eudicotyledons	SPECIATION	Pentapetalae	SPECIATION	0.24	True	0.097	0.143	0.670538	0.502515
32227	eudicotyledons	SPECIATION	Pentapetalae	SPECIATION	0.131	True	0.097	0.034	-0.0319463	0.974515
32227	eudicotyledons	SPECIATION	Pentapetalae	SPECIATION	0.168	True	0.097	0.071	0.206512	0.836391
32227	eudicotyledons	SPECIATION	Pentapetalae	SPECIATION	0.12	True	0.097	0.023	-0.102839	0.918091
32227	eudicotyledons	SPECIATION	Pentapetalae	SPECIATION	0.015	False	0.097	-0.082	-0.779544	0.435659
32227	eudicotyledons	SPECIATION	Pentapetalae	SPECIATION	0.172	True	0.097	0.075	0.232291	0.816312
32227	eudicotyledons	SPECIATION	Pentapetalae	SPECIATION	0.126	True	0.097	0.029	-0.0641704	0.948835
32227	eudicotyledons	SPECIATION	Pentapetalae	SPECIATION	0.074	False	0.097	-0.023	-0.399301	0.689672
32227	eudicotyledons	SPECIATION	Pentapetalae	SPECIATION	0.613	True	0.097	0.516	3.07445	0.00210889
32227	eudicotyledons	SPECIATION	Pentapetalae	SPECIATION	0.145	True	0.097	0.048	0.0582811	0.953525
32227	eudicotyledons	SPECIATION	Pentapetalae	SPECIATION	0.075	False	0.097	-0.022	-0.392856	0.694426
32227	eudicotyledons	SPECIATION	Pentapetalae	SPECIATION	0.219	False	0.097	0.122	0.535197	0.592514
32227	eudicotyledons	SPECIATION	Pentapetalae	SPECIATION	0.165	True	0.097	0.068	0.187177	0.851522
32227	eudicotyledons	SPECIATION	Pentapetalae	SPECIATION	0.142	True	0.097	0.045	0.0389466	0.968933
32227	eudicotyledons	SPECIATION	Pentapetalae	SPECIATION	0.051	False	0.097	-0.046	-0.547531	0.584014
32227	eudicotyledons	SPECIATION	Pentapetalae	SPECIATION	0.057	False	0.097	-0.04	-0.508862	0.610849
32227	eudicotyledons	SPECIATION	Pentapetalae	SPECIATION	0.125	True	0.097	0.028	-0.0706152	0.943704
32227	eudicotyledons	SPECIATION	Pentapetalae	SPECIATION	0.059	True	0.097	-0.038	-0.495973	0.619914
32227	eudicotyledons	SPECIATION	Pentapetalae	SPECIATION	0.106	True	0.097	0.009	-0.193067	0.846907
32227	eudicotyledons	SPECIATION	Pentapetalae	SPECIATION	0.13	True	0.097	0.033	-0.0383911	0.969376
32227	eudicotyledons	SPECIATION	Pentapetalae	SPECIATION	0.04	False	0.097	-0.057	-0.618424	0.536296
32227	eudicotyledons	SPECIATION	Pentapetalae	SPECIATION	0.137	False	0.097	0.04	0.00672256	0.994636
32227	eudicotyledons	SPECIATION	Pentapetalae	SPECIATION	0.165	True	0.097	0.068	0.187177	0.851522
32227	eudicotyledons	SPECIATION	Pentapetalae	SPECIATION	0.118	True	0.097	0.021	-0.115729	0.907867
32227	eudicotyledons	SPECIATION	Pentapetalae	SPECIATION	0.083	False	0.097	-0.014	-0.341297	0.73288
32227	eudicotyledons	SPECIATION	Pentapetalae	SPECIATION	0.084	False	0.097	-0.013	-0.334852	0.737736
32227	eudicotyledons	SPECIATION	Pentapetalae	SPECIATION	0.081	False	0.097	-0.016	-0.354187	0.723199
32227	eudicotyledons	SPECIATION	Pentapetalae	SPECIATION	0.024	False	0.097	-0.073	-0.721541	0.470577
14094	eudicotyledons	SPECIATION	Pentapetalae	SPECIATION	0.095	False	0.09	0.005	-0.218846	0.82677
19847	eudicotyledons	SPECIATION	Pentapetalae	SPECIATION	0.106	True	0.08	0.026	-0.0835048	0.93345
19847	eudicotyledons	SPECIATION	Pentapetalae	SPECIATION	0.098	True	0.08	0.018	-0.135063	0.892562
36373	eudicotyledons	SPECIATION	Pentapetalae	SPECIATION	0.163	False	0.15	0.013	-0.167287	0.867144
47848	eudicotyledons	SPECIATION	Pentapetalae	SPECIATION	0.205	False	0.102	0.103	0.412746	0.679793
11721	eudicotyledons	SPECIATION	Pentapetalae	SPECIATION	0.007	False	0.041	-0.034	-0.470194	0.638217
11721	eudicotyledons	SPECIATION	Pentapetalae	SPECIATION	0.058	True	0.041	0.017	-0.141508	0.887469
11721	eudicotyledons	SPECIATION	Pentapetalae	SPECIATION	0.059	True	0.041	0.018	-0.135063	0.892562
23426	eudicotyledons	SPECIATION	Pentapetalae	SPECIATION	0.152	False	0.064	0.088	0.316074	0.751947
23426	eudicotyledons	SPECIATION	Pentapetalae	SPECIATION	0.04	False	0.064	-0.024	-0.405745	0.68493
23426	eudicotyledons	SPECIATION	Pentapetalae	SPECIATION	0.059	False	0.064	-0.005	-0.283294	0.776951
23426	eudicotyledons	SPECIATION	Pentapetalae	SPECIATION	0.035	False	0.064	-0.029	-0.437969	0.661408
43173	eudicotyledons	SPECIATION	Pentapetalae	SPECIATION	0.099	False	0.069	0.03	-0.0577256	0.953967
43173	eudicotyledons	SPECIATION	Pentapetalae	SPECIATION	0.068	False	0.069	-0.001	-0.257515	0.796781
43173	eudicotyledons	SPECIATION	Pentapetalae	SPECIATION	0.053	False	0.069	-0.016	-0.354187	0.723199
43173	eudicotyledons	SPECIATION	Pentapetalae	SPECIATION	0.064	False	0.069	-0.005	-0.283294	0.776951
43173	eudicotyledons	SPECIATION	Pentapetalae	SPECIATION	0.073	False	0.069	0.004	-0.225291	0.821753
32116	eudicotyledons	SPECIATION	Pentapetalae	SPECIATION	0.053	False	0.065	-0.012	-0.328408	0.742603
32116	eudicotyledons	SPECIATION	Pentapetalae	SPECIATION	0.046	False	0.065	-0.019	-0.373521	0.70876
32116	eudicotyledons	SPECIATION	Pentapetalae	SPECIATION	0.062	False	0.065	-0.003	-0.270404	0.786849
32116	eudicotyledons	SPECIATION	Pentapetalae	SPECIATION	0.124	False	0.065	0.059	0.129174	0.89722
32116	eudicotyledons	SPECIATION	Pentapetalae	SPECIATION	0.039	False	0.065	-0.026	-0.418635	0.675483
32116	eudicotyledons	SPECIATION	Pentapetalae	SPECIATION	0.078	False	0.065	0.013	-0.167287	0.867144
32116	eudicotyledons	SPECIATION	Pentapetalae	SPECIATION	0.043	False	0.065	-0.022	-0.392856	0.694426
32116	eudicotyledons	SPECIATION	Pentapetalae	SPECIATION	0.122	False	0.065	0.057	0.116284	0.907427
32116	eudicotyledons	SPECIATION	Pentapetalae	SPECIATION	0.032	False	0.065	-0.033	-0.463749	0.642828
32116	eudicotyledons	SPECIATION	Pentapetalae	SPECIATION	0.119	False	0.065	0.054	0.0969499	0.922766
32116	eudicotyledons	SPECIATION	Pentapetalae	SPECIATION	0.025	False	0.065	-0.04	-0.508862	0.610849
13673	eudicotyledons	SPECIATION	Pentapetalae	SPECIATION	0.185	False	0.091	0.094	0.354742	0.722783
46913	eudicotyledons	SPECIATION	Pentapetalae	SPECIATION	0.264	True	0.156	0.108	0.44497	0.656342
46913	eudicotyledons	SPECIATION	Pentapetalae	SPECIATION	0.176	True	0.156	0.02	-0.122174	0.902761
34945	eudicotyledons	SPECIATION	Pentapetalae	SPECIATION	0.333	False	0.168	0.165	0.812324	0.416606
34945	eudicotyledons	SPECIATION	Pentapetalae	SPECIATION	0.191	False	0.168	0.023	-0.102839	0.918091
34945	eudicotyledons	SPECIATION	Pentapetalae	SPECIATION	0.125	False	0.168	-0.043	-0.528197	0.597363
43317	eudicotyledons	SPECIATION	Pentapetalae	SPECIATION	0.084	False	0.077	0.007	-0.205956	0.836825
43317	eudicotyledons	SPECIATION	Pentapetalae	SPECIATION	0.075	False	0.077	-0.002	-0.26396	0.791811
33492	eudicotyledons	SPECIATION	Pentapetalae	SPECIATION	0.041	False	0.148	-0.107	-0.940665	0.346877
33492	eudicotyledons	SPECIATION	Pentapetalae	SPECIATION	0.287	False	0.148	0.139	0.644759	0.519083
33492	eudicotyledons	SPECIATION	Pentapetalae	SPECIATION	0.119	False	0.148	-0.029	-0.437969	0.661408
33492	eudicotyledons	SPECIATION	Pentapetalae	SPECIATION	0.163	False	0.148	0.015	-0.154398	0.877296
47780	eudicotyledons	SPECIATION	Pentapetalae	SPECIATION	0.294	False	0.19	0.104	0.419191	0.675077
45883	eudicotyledons	SPECIATION	Pentapetalae	SPECIATION	0.103	False	0.074	0.029	-0.0641704	0.948835
45883	eudicotyledons	SPECIATION	Pentapetalae	SPECIATION	0.041	False	0.074	-0.033	-0.463749	0.642828
16263	eudicotyledons	SPECIATION	Pentapetalae	SPECIATION	0.113	False	0.1	0.013	-0.167287	0.867144
12777	eudicotyledons	SPECIATION	Pentapetalae	SPECIATION	0	False	0.026	-0.026	-0.418635	0.675483
12777	eudicotyledons	SPECIATION	Pentapetalae	SPECIATION	0.01	False	0.026	-0.016	-0.354187	0.723199
34121	eudicotyledons	SPECIATION	Pentapetalae	SPECIATION	0.085	False	0.119	-0.034	-0.470194	0.638217
36800	eudicotyledons	SPECIATION	Pentapetalae	SPECIATION	0.186	False	0.136	0.05	0.0711707	0.943262
28532	eudicotyledons	SPECIATION	Pentapetalae	SPECIATION	0.11	False	0.112	-0.002	-0.26396	0.791811
12170	eudicotyledons	SPECIATION	Pentapetalae	SPECIATION	0.053	False	0.079	-0.026	-0.418635	0.675483
12170	eudicotyledons	SPECIATION	Pentapetalae	SPECIATION	0.076	False	0.079	-0.003	-0.270404	0.786849
23322	eudicotyledons	SPECIATION	Pentapetalae	SPECIATION	0.116	False	0.105	0.011	-0.180177	0.857014
23322	eudicotyledons	SPECIATION	Pentapetalae	SPECIATION	0.045	False	0.105	-0.06	-0.637759	0.523631
23322	eudicotyledons	SPECIATION	Pentapetalae	SPECIATION	0.044	False	0.105	-0.061	-0.644203	0.519444
48175	eudicotyledons	SPECIATION	Pentapetalae	SPECIATION	0.164	False	0.076	0.088	0.316074	0.751947
31840	eudicotyledons	SPECIATION	Pentapetalae	SPECIATION	0.085	False	0.097	-0.012	-0.328408	0.742603
34209	eudicotyledons	SPECIATION	Pentapetalae	SPECIATION	0.169	False	0.12	0.049	0.0647259	0.948392
34209	eudicotyledons	SPECIATION	Pentapetalae	SPECIATION	0.109	False	0.12	-0.011	-0.321963	0.747481
14363	eudicotyledons	SPECIATION	Pentapetalae	SPECIATION	0.061	False	0.09	-0.029	-0.437969	0.661408
14363	eudicotyledons	SPECIATION	Pentapetalae	SPECIATION	0.188	True	0.09	0.098	0.380522	0.703558
14363	eudicotyledons	SPECIATION	Pentapetalae	SPECIATION	0.191	True	0.09	0.101	0.399856	0.689263
47460	eudicotyledons	SPECIATION	Pentapetalae	SPECIATION	0.133	False	0.129	0.004	-0.225291	0.821753
33344	eudicotyledons	SPECIATION	Pentapetalae	SPECIATION	0.15	False	0.14	0.01	-0.186622	0.851957
33344	eudicotyledons	SPECIATION	Pentapetalae	SPECIATION	0.111	False	0.14	-0.029	-0.437969	0.661408
31747	eudicotyledons	SPECIATION	Pentapetalae	SPECIATION	0.047	False	0.074	-0.027	-0.42508	0.670778
31747	eudicotyledons	SPECIATION	Pentapetalae	SPECIATION	0.112	False	0.074	0.038	-0.00616706	0.995079
31747	eudicotyledons	SPECIATION	Pentapetalae	SPECIATION	0.019	False	0.074	-0.055	-0.605535	0.544824
23333	eudicotyledons	SPECIATION	Pentapetalae	SPECIATION	0.192	True	0.089	0.103	0.412746	0.679793
23333	eudicotyledons	SPECIATION	Pentapetalae	SPECIATION	0.09	True	0.089	0.001	-0.244625	0.806747
37258	eudicotyledons	SPECIATION	Pentapetalae	SPECIATION	0.275	False	0.249	0.026	-0.0835048	0.93345
11071	eudicotyledons	SPECIATION	Pentapetalae	SPECIATION	0.02	False	0.042	-0.022	-0.392856	0.694426
11071	eudicotyledons	SPECIATION	Pentapetalae	SPECIATION	0.007	False	0.042	-0.035	-0.476638	0.63362
11071	eudicotyledons	SPECIATION	Pentapetalae	SPECIATION	0.027	False	0.042	-0.015	-0.347742	0.728034
11071	eudicotyledons	SPECIATION	Pentapetalae	SPECIATION	0.033	False	0.042	-0.009	-0.309073	0.757266
19306	eudicotyledons	SPECIATION	Pentapetalae	SPECIATION	0.076	False	0.131	-0.055	-0.605535	0.544824
31168	eudicotyledons	SPECIATION	Pentapetalae	SPECIATION	0.19	True	0.101	0.089	0.322518	0.74706
31168	eudicotyledons	SPECIATION	Pentapetalae	SPECIATION	0.194	True	0.101	0.093	0.348298	0.727617
31168	eudicotyledons	SPECIATION	Pentapetalae	SPECIATION	0.044	False	0.101	-0.057	-0.618424	0.536296
31168	eudicotyledons	SPECIATION	Pentapetalae	SPECIATION	0.039	False	0.101	-0.062	-0.650648	0.515274
31734	eudicotyledons	SPECIATION	Pentapetalae	SPECIATION	0.078	False	0.057	0.021	-0.115729	0.907867
31734	eudicotyledons	SPECIATION	Pentapetalae	SPECIATION	0.052	False	0.057	-0.005	-0.283294	0.776951
31734	eudicotyledons	SPECIATION	Pentapetalae	SPECIATION	0.021	False	0.057	-0.036	-0.483083	0.629037
31734	eudicotyledons	SPECIATION	Pentapetalae	SPECIATION	0.066	False	0.057	0.009	-0.193067	0.846907
31734	eudicotyledons	SPECIATION	Pentapetalae	SPECIATION	0.042	False	0.057	-0.015	-0.347742	0.728034
31734	eudicotyledons	SPECIATION	Pentapetalae	SPECIATION	0.095	True	0.057	0.038	-0.00616706	0.995079
31734	eudicotyledons	SPECIATION	Pentapetalae	SPECIATION	0.062	True	0.057	0.005	-0.218846	0.82677
31734	eudicotyledons	SPECIATION	Pentapetalae	SPECIATION	0.105	True	0.057	0.048	0.0582811	0.953525
31734	eudicotyledons	SPECIATION	Pentapetalae	SPECIATION	0.095	True	0.057	0.038	-0.00616706	0.995079
31734	eudicotyledons	SPECIATION	Pentapetalae	SPECIATION	0.051	True	0.057	-0.006	-0.289739	0.772016
31734	eudicotyledons	SPECIATION	Pentapetalae	SPECIATION	0.106	True	0.057	0.049	0.0647259	0.948392
31734	eudicotyledons	SPECIATION	Pentapetalae	SPECIATION	0.02	True	0.057	-0.037	-0.489528	0.624468
31734	eudicotyledons	SPECIATION	Pentapetalae	SPECIATION	0.021	False	0.057	-0.036	-0.483083	0.629037
31734	eudicotyledons	SPECIATION	Pentapetalae	SPECIATION	0	False	0.057	-0.057	-0.618424	0.536296
31734	eudicotyledons	SPECIATION	Pentapetalae	SPECIATION	0.032	False	0.057	-0.025	-0.41219	0.6802
31734	eudicotyledons	SPECIATION	Pentapetalae	SPECIATION	0.084	True	0.057	0.027	-0.07706	0.938576
31734	eudicotyledons	SPECIATION	Pentapetalae	SPECIATION	0.042	True	0.057	-0.015	-0.347742	0.728034
31734	eudicotyledons	SPECIATION	Pentapetalae	SPECIATION	0.168	False	0.057	0.111	0.464304	0.64243
31734	eudicotyledons	SPECIATION	Pentapetalae	SPECIATION	0.109	False	0.057	0.052	0.0840603	0.933008
31734	eudicotyledons	SPECIATION	Pentapetalae	SPECIATION	0.175	True	0.057	0.118	0.509418	0.610459
31734	eudicotyledons	SPECIATION	Pentapetalae	SPECIATION	0.101	True	0.057	0.044	0.0325018	0.974072
31734	eudicotyledons	SPECIATION	Pentapetalae	SPECIATION	0.055	True	0.057	-0.002	-0.26396	0.791811
22951	eudicotyledons	SPECIATION	Pentapetalae	SPECIATION	0.098	False	0.087	0.011	-0.180177	0.857014
22951	eudicotyledons	SPECIATION	Pentapetalae	SPECIATION	0.074	False	0.087	-0.013	-0.334852	0.737736
22951	eudicotyledons	SPECIATION	Pentapetalae	SPECIATION	0.097	False	0.087	0.01	-0.186622	0.851957
22951	eudicotyledons	SPECIATION	Pentapetalae	SPECIATION	0.176	False	0.087	0.089	0.322518	0.74706
22951	eudicotyledons	SPECIATION	Pentapetalae	SPECIATION	1.133	True	0.087	1.046	6.4902	8.57205e-11
22951	eudicotyledons	SPECIATION	Pentapetalae	SPECIATION	0.188	True	0.087	0.101	0.399856	0.689263
22951	eudicotyledons	SPECIATION	Pentapetalae	SPECIATION	0.027	False	0.087	-0.06	-0.637759	0.523631
22951	eudicotyledons	SPECIATION	Pentapetalae	SPECIATION	0.038	False	0.087	-0.049	-0.566866	0.570805
22951	eudicotyledons	SPECIATION	Pentapetalae	SPECIATION	0.463	True	0.087	0.376	2.17218	0.0298421
22951	eudicotyledons	SPECIATION	Pentapetalae	SPECIATION	0.337	True	0.087	0.25	1.36013	0.173788
22951	eudicotyledons	SPECIATION	Pentapetalae	SPECIATION	0.059	False	0.087	-0.028	-0.431525	0.666087
21049	eudicotyledons	SPECIATION	Pentapetalae	SPECIATION	0.103	False	0.085	0.018	-0.135063	0.892562
21049	eudicotyledons	SPECIATION	Pentapetalae	SPECIATION	0.115	False	0.085	0.03	-0.0577256	0.953967
47285	eudicotyledons	SPECIATION	Pentapetalae	SPECIATION	0.119	False	0.096	0.023	-0.102839	0.918091
47488	eudicotyledons	SPECIATION	Pentapetalae	SPECIATION	0.151	False	0.195	-0.044	-0.534642	0.592898
37706	eudicotyledons	SPECIATION	Pentapetalae	SPECIATION	0.242	False	0.22	0.022	-0.109284	0.912977
46281	eudicotyledons	SPECIATION	Pentapetalae	SPECIATION	0.027	False	0.056	-0.029	-0.437969	0.661408
46281	eudicotyledons	SPECIATION	Pentapetalae	SPECIATION	0.026	False	0.056	-0.03	-0.444414	0.656743
46281	eudicotyledons	SPECIATION	Pentapetalae	SPECIATION	0.013	False	0.056	-0.043	-0.528197	0.597363
31651	eudicotyledons	SPECIATION	Pentapetalae	SPECIATION	0.3	True	0.111	0.189	0.967	0.333544
31651	eudicotyledons	SPECIATION	Pentapetalae	SPECIATION	0.176	True	0.111	0.065	0.167843	0.866707
31651	eudicotyledons	SPECIATION	Pentapetalae	SPECIATION	0.045	False	0.111	-0.066	-0.676427	0.498769
35997	eudicotyledons	SPECIATION	Pentapetalae	SPECIATION	0.214	False	0.224	-0.01	-0.315518	0.752368
35997	eudicotyledons	SPECIATION	Pentapetalae	SPECIATION	0.151	False	0.224	-0.073	-0.721541	0.470577
22100	eudicotyledons	SPECIATION	Pentapetalae	SPECIATION	0.137	False	0.11	0.027	-0.07706	0.938576
45760	eudicotyledons	SPECIATION	Pentapetalae	SPECIATION	0.157	True	0.076	0.081	0.27096	0.786422
45760	eudicotyledons	SPECIATION	Pentapetalae	SPECIATION	0.132	True	0.076	0.056	0.10984	0.912537
45760	eudicotyledons	SPECIATION	Pentapetalae	SPECIATION	0.128	True	0.076	0.052	0.0840603	0.933008
33698	eudicotyledons	SPECIATION	Pentapetalae	SPECIATION	0.152	False	0.174	-0.022	-0.392856	0.694426
33698	eudicotyledons	SPECIATION	Pentapetalae	SPECIATION	0.207	False	0.174	0.033	-0.0383911	0.969376
33698	eudicotyledons	SPECIATION	Pentapetalae	SPECIATION	0.106	False	0.174	-0.068	-0.689317	0.490624
10502	eudicotyledons	SPECIATION	Pentapetalae	SPECIATION	0.118	False	0.095	0.023	-0.102839	0.918091
10502	eudicotyledons	SPECIATION	Pentapetalae	SPECIATION	0.067	False	0.095	-0.028	-0.431525	0.666087
10502	eudicotyledons	SPECIATION	Pentapetalae	SPECIATION	0.041	False	0.095	-0.054	-0.59909	0.549113
10502	eudicotyledons	SPECIATION	Pentapetalae	SPECIATION	0.069	False	0.095	-0.026	-0.418635	0.675483
10502	eudicotyledons	SPECIATION	Pentapetalae	SPECIATION	0.118	False	0.095	0.023	-0.102839	0.918091
34129	eudicotyledons	SPECIATION	Pentapetalae	SPECIATION	0.13	False	0.084	0.046	0.0453914	0.963795
47252	eudicotyledons	SPECIATION	Pentapetalae	SPECIATION	0.042	False	0.056	-0.014	-0.341297	0.73288
15952	eudicotyledons	SPECIATION	Pentapetalae	SPECIATION	0.081	False	0.083	-0.002	-0.26396	0.791811
35459	eudicotyledons	SPECIATION	Pentapetalae	SPECIATION	0.194	False	0.179	0.015	-0.154398	0.877296
45188	eudicotyledons	SPECIATION	Pentapetalae	SPECIATION	0.053	False	0.059	-0.006	-0.289739	0.772016
28309	eudicotyledons	SPECIATION	Pentapetalae	SPECIATION	0.102	False	0.089	0.013	-0.167287	0.867144
31966	eudicotyledons	SPECIATION	Pentapetalae	SPECIATION	0.145	True	0.083	0.062	0.148508	0.881942
31966	eudicotyledons	SPECIATION	Pentapetalae	SPECIATION	0.047	True	0.083	-0.036	-0.483083	0.629037
10744	eudicotyledons	SPECIATION	Pentapetalae	SPECIATION	0.065	True	0.039	0.026	-0.0835048	0.93345
10744	eudicotyledons	SPECIATION	Pentapetalae	SPECIATION	0	True	0.039	-0.039	-0.502418	0.615374
10744	eudicotyledons	SPECIATION	Pentapetalae	SPECIATION	0.053	False	0.039	0.014	-0.160843	0.872217
10744	eudicotyledons	SPECIATION	Pentapetalae	SPECIATION	0.04	False	0.039	0.001	-0.244625	0.806747
31057	eudicotyledons	SPECIATION	Pentapetalae	SPECIATION	0.125	False	0.081	0.044	0.0325018	0.974072
33149	eudicotyledons	SPECIATION	Pentapetalae	SPECIATION	0	False	0.041	-0.041	-0.515307	0.606338
33149	eudicotyledons	SPECIATION	Pentapetalae	SPECIATION	0	False	0.041	-0.041	-0.515307	0.606338
13604	eudicotyledons	SPECIATION	Pentapetalae	SPECIATION	0.079	False	0.075	0.004	-0.225291	0.821753
21531	eudicotyledons	SPECIATION	Pentapetalae	SPECIATION	0.091	False	0.091	0	-0.25107	0.80176
36018	eudicotyledons	SPECIATION	Pentapetalae	SPECIATION	0.061	False	0.109	-0.048	-0.560421	0.575192
11239	eudicotyledons	SPECIATION	Pentapetalae	SPECIATION	0.321	False	0.071	0.25	1.36013	0.173788
11239	eudicotyledons	SPECIATION	Pentapetalae	SPECIATION	0.01	False	0.071	-0.061	-0.644203	0.519444
11239	eudicotyledons	SPECIATION	Pentapetalae	SPECIATION	0.274	False	0.071	0.203	1.05723	0.290408
20941	eudicotyledons	SPECIATION	Pentapetalae	SPECIATION	0.076	False	0.065	0.011	-0.180177	0.857014
34786	eudicotyledons	SPECIATION	Pentapetalae	SPECIATION	0.242	False	0.154	0.088	0.316074	0.751947
48059	eudicotyledons	SPECIATION	Pentapetalae	SPECIATION	0.212	False	0.205	0.007	-0.205956	0.836825
48059	eudicotyledons	SPECIATION	Pentapetalae	SPECIATION	0.084	False	0.205	-0.121	-1.03089	0.302591
48059	eudicotyledons	SPECIATION	Pentapetalae	SPECIATION	0.525	True	0.205	0.32	1.81127	0.0700991
48059	eudicotyledons	SPECIATION	Pentapetalae	SPECIATION	0.314	True	0.205	0.109	0.451415	0.651691
48059	eudicotyledons	SPECIATION	Pentapetalae	SPECIATION	0.275	True	0.205	0.07	0.200067	0.841428
48059	eudicotyledons	SPECIATION	Pentapetalae	SPECIATION	0.092	False	0.205	-0.113	-0.979334	0.327415
48059	eudicotyledons	SPECIATION	Pentapetalae	SPECIATION	0.568	True	0.205	0.363	2.0884	0.0367621
48059	eudicotyledons	SPECIATION	Pentapetalae	SPECIATION	0.472	True	0.205	0.267	1.46969	0.141644
14091	eudicotyledons	SPECIATION	Pentapetalae	SPECIATION	0.085	False	0.08	0.005	-0.218846	0.82677
20955	eudicotyledons	SPECIATION	Pentapetalae	SPECIATION	0.296	False	0.116	0.18	0.908996	0.363352
16017	eudicotyledons	SPECIATION	Pentapetalae	SPECIATION	0.066	False	0.064	0.002	-0.23818	0.811741
13547	eudicotyledons	SPECIATION	Pentapetalae	SPECIATION	0.102	False	0.113	-0.011	-0.321963	0.747481
13547	eudicotyledons	SPECIATION	Pentapetalae	SPECIATION	0.097	False	0.113	-0.016	-0.354187	0.723199
13547	eudicotyledons	SPECIATION	Pentapetalae	SPECIATION	0.063	False	0.113	-0.05	-0.573311	0.566434
45765	eudicotyledons	SPECIATION	Pentapetalae	SPECIATION	0.025	False	0.047	-0.022	-0.392856	0.694426
31285	eudicotyledons	SPECIATION	Pentapetalae	SPECIATION	0.084	False	0.078	0.006	-0.212401	0.831794
34807	eudicotyledons	SPECIATION	Pentapetalae	SPECIATION	0.711	True	0.207	0.504	2.99712	0.00272548
34807	eudicotyledons	SPECIATION	Pentapetalae	SPECIATION	0.459	True	0.207	0.252	1.37302	0.169745
21349	eudicotyledons	SPECIATION	Pentapetalae	SPECIATION	0.069	False	0.083	-0.014	-0.341297	0.73288
21349	eudicotyledons	SPECIATION	Pentapetalae	SPECIATION	0.066	False	0.083	-0.017	-0.360632	0.718375
37766	eudicotyledons	SPECIATION	Pentapetalae	SPECIATION	0.148	False	0.123	0.025	-0.0899496	0.928327
47604	eudicotyledons	SPECIATION	Pentapetalae	SPECIATION	0.177	False	0.123	0.054	0.0969499	0.922766
31619	eudicotyledons	SPECIATION	Pentapetalae	SPECIATION	0.065	False	0.051	0.014	-0.160843	0.872217
21077	eudicotyledons	SPECIATION	Pentapetalae	SPECIATION	0.156	False	0.141	0.015	-0.154398	0.877296
12708	eudicotyledons	SPECIATION	Pentapetalae	SPECIATION	0.092	False	0.076	0.016	-0.147953	0.88238
45629	eudicotyledons	SPECIATION	Pentapetalae	SPECIATION	0.027	False	0.052	-0.025	-0.41219	0.6802
45629	eudicotyledons	SPECIATION	Pentapetalae	SPECIATION	0.068	False	0.052	0.016	-0.147953	0.88238
45629	eudicotyledons	SPECIATION	Pentapetalae	SPECIATION	0.071	False	0.052	0.019	-0.128618	0.89766
45629	eudicotyledons	SPECIATION	Pentapetalae	SPECIATION	0.039	False	0.052	-0.013	-0.334852	0.737736
42698	eudicotyledons	SPECIATION	Pentapetalae	SPECIATION	0.092	False	0.067	0.025	-0.0899496	0.928327
42698	eudicotyledons	SPECIATION	Pentapetalae	SPECIATION	0.035	False	0.067	-0.032	-0.457304	0.647453
31348	eudicotyledons	SPECIATION	Pentapetalae	SPECIATION	0.047	False	0.089	-0.042	-0.521752	0.601843
31348	eudicotyledons	SPECIATION	Pentapetalae	SPECIATION	0.079	False	0.089	-0.01	-0.315518	0.752368
31348	eudicotyledons	SPECIATION	Pentapetalae	SPECIATION	0.045	False	0.089	-0.044	-0.534642	0.592898
35483	eudicotyledons	SPECIATION	Pentapetalae	SPECIATION	0.29	False	0.191	0.099	0.386966	0.698781
20426	eudicotyledons	SPECIATION	Pentapetalae	SPECIATION	0.053	False	0.058	-0.005	-0.283294	0.776951
28066	eudicotyledons	SPECIATION	Pentapetalae	SPECIATION	0.13	False	0.077	0.053	0.0905051	0.927886
36786	eudicotyledons	SPECIATION	Pentapetalae	SPECIATION	0.267	False	0.24	0.027	-0.07706	0.938576
47948	eudicotyledons	SPECIATION	Pentapetalae	SPECIATION	0.074	False	0.056	0.018	-0.135063	0.892562
47948	eudicotyledons	SPECIATION	Pentapetalae	SPECIATION	0.04	False	0.056	-0.016	-0.354187	0.723199
47948	eudicotyledons	SPECIATION	Pentapetalae	SPECIATION	0.045	False	0.056	-0.011	-0.321963	0.747481
35098	eudicotyledons	SPECIATION	Pentapetalae	SPECIATION	0.099	False	0.24	-0.141	-1.15979	0.246135
36807	eudicotyledons	SPECIATION	Pentapetalae	SPECIATION	0.213	False	0.144	0.069	0.193622	0.846472
14083	eudicotyledons	SPECIATION	Pentapetalae	SPECIATION	0.383	True	0.065	0.318	1.79838	0.0721168
14083	eudicotyledons	SPECIATION	Pentapetalae	SPECIATION	0.171	True	0.065	0.106	0.43208	0.665683
44579	eudicotyledons	SPECIATION	Pentapetalae	SPECIATION	0.081	False	0.081	0	-0.25107	0.80176
24320	eudicotyledons	SPECIATION	Pentapetalae	SPECIATION	0.287	True	0.081	0.206	1.07656	0.281676
24320	eudicotyledons	SPECIATION	Pentapetalae	SPECIATION	0.151	True	0.081	0.07	0.200067	0.841428
24320	eudicotyledons	SPECIATION	Pentapetalae	SPECIATION	0.075	False	0.081	-0.006	-0.289739	0.772016
24320	eudicotyledons	SPECIATION	Pentapetalae	SPECIATION	0.023	False	0.081	-0.058	-0.624869	0.532057
24320	eudicotyledons	SPECIATION	Pentapetalae	SPECIATION	0.119	True	0.081	0.038	-0.00616706	0.995079
24320	eudicotyledons	SPECIATION	Pentapetalae	SPECIATION	0.162	True	0.081	0.081	0.27096	0.786422
24320	eudicotyledons	SPECIATION	Pentapetalae	SPECIATION	0.143	True	0.081	0.062	0.148508	0.881942
24320	eudicotyledons	SPECIATION	Pentapetalae	SPECIATION	0.084	False	0.081	0.003	-0.231735	0.816743
24320	eudicotyledons	SPECIATION	Pentapetalae	SPECIATION	0.099	False	0.081	0.018	-0.135063	0.892562
34281	eudicotyledons	SPECIATION	Pentapetalae	SPECIATION	0.231	True	0.198	0.033	-0.0383911	0.969376
34281	eudicotyledons	SPECIATION	Pentapetalae	SPECIATION	0.185	True	0.198	-0.013	-0.334852	0.737736
34954	eudicotyledons	SPECIATION	Pentapetalae	SPECIATION	0.16	False	0.107	0.053	0.0905051	0.927886
34954	eudicotyledons	SPECIATION	Pentapetalae	SPECIATION	0.158	False	0.107	0.051	0.0776155	0.938134
33919	eudicotyledons	SPECIATION	Pentapetalae	SPECIATION	0.562	True	0.149	0.413	2.41064	0.0159247
33919	eudicotyledons	SPECIATION	Pentapetalae	SPECIATION	0.525	True	0.149	0.376	2.17218	0.0298421
33919	eudicotyledons	SPECIATION	Pentapetalae	SPECIATION	0.416	True	0.149	0.267	1.46969	0.141644
33919	eudicotyledons	SPECIATION	Pentapetalae	SPECIATION	0.59	True	0.149	0.441	2.59109	0.00956719
33919	eudicotyledons	SPECIATION	Pentapetalae	SPECIATION	0.317	True	0.149	0.168	0.831658	0.405602
11108	eudicotyledons	SPECIATION	Pentapetalae	SPECIATION	0.021	False	0.054	-0.033	-0.463749	0.642828
11108	eudicotyledons	SPECIATION	Pentapetalae	SPECIATION	0.038	False	0.054	-0.016	-0.354187	0.723199
10678	eudicotyledons	SPECIATION	Pentapetalae	SPECIATION	0.013	False	0.044	-0.031	-0.450859	0.652091
10678	eudicotyledons	SPECIATION	Pentapetalae	SPECIATION	0.021	False	0.044	-0.023	-0.399301	0.689672
13844	eudicotyledons	SPECIATION	Pentapetalae	SPECIATION	0.097	True	0.088	0.009	-0.193067	0.846907
13844	eudicotyledons	SPECIATION	Pentapetalae	SPECIATION	0.112	True	0.088	0.024	-0.0963944	0.923207
13844	eudicotyledons	SPECIATION	Pentapetalae	SPECIATION	0.079	False	0.088	-0.009	-0.309073	0.757266
13844	eudicotyledons	SPECIATION	Pentapetalae	SPECIATION	0.042	False	0.088	-0.046	-0.547531	0.584014
13844	eudicotyledons	SPECIATION	Pentapetalae	SPECIATION	0.198	False	0.088	0.11	0.457859	0.647053
13844	eudicotyledons	SPECIATION	Pentapetalae	SPECIATION	0.053	False	0.088	-0.035	-0.476638	0.63362
13844	eudicotyledons	SPECIATION	Pentapetalae	SPECIATION	0.202	False	0.088	0.114	0.483639	0.628642
18804	eudicotyledons	SPECIATION	Pentapetalae	SPECIATION	0.051	False	0.036	0.015	-0.154398	0.877296
13374	eudicotyledons	SPECIATION	Pentapetalae	SPECIATION	0.049	False	0.066	-0.017	-0.360632	0.718375
19282	eudicotyledons	SPECIATION	Pentapetalae	SPECIATION	0.417	True	0.12	0.297	1.66304	0.0963046
19282	eudicotyledons	SPECIATION	Pentapetalae	SPECIATION	0.3	True	0.12	0.18	0.908996	0.363352
19282	eudicotyledons	SPECIATION	Pentapetalae	SPECIATION	0.044	False	0.12	-0.076	-0.740876	0.458769
19282	eudicotyledons	SPECIATION	Pentapetalae	SPECIATION	0.137	False	0.12	0.017	-0.141508	0.887469
11040	eudicotyledons	SPECIATION	Pentapetalae	SPECIATION	0.047	False	0.068	-0.021	-0.386411	0.699192
11040	eudicotyledons	SPECIATION	Pentapetalae	SPECIATION	0.058	False	0.068	-0.01	-0.315518	0.752368
11040	eudicotyledons	SPECIATION	Pentapetalae	SPECIATION	0.036	False	0.068	-0.032	-0.457304	0.647453
11040	eudicotyledons	SPECIATION	Pentapetalae	SPECIATION	0.149	True	0.068	0.081	0.27096	0.786422
11040	eudicotyledons	SPECIATION	Pentapetalae	SPECIATION	0.174	True	0.068	0.106	0.43208	0.665683
11040	eudicotyledons	SPECIATION	Pentapetalae	SPECIATION	0.113	True	0.068	0.045	0.0389466	0.968933
11040	eudicotyledons	SPECIATION	Pentapetalae	SPECIATION	0.118	False	0.068	0.05	0.0711707	0.943262
11040	eudicotyledons	SPECIATION	Pentapetalae	SPECIATION	0.036	False	0.068	-0.032	-0.457304	0.647453
11040	eudicotyledons	SPECIATION	Pentapetalae	SPECIATION	0.053	False	0.068	-0.015	-0.347742	0.728034
11040	eudicotyledons	SPECIATION	Pentapetalae	SPECIATION	0.058	False	0.068	-0.01	-0.315518	0.752368
11040	eudicotyledons	SPECIATION	Pentapetalae	SPECIATION	0.026	False	0.068	-0.042	-0.521752	0.601843
22976	eudicotyledons	SPECIATION	Pentapetalae	SPECIATION	0.05	False	0.047	0.003	-0.231735	0.816743
47384	eudicotyledons	SPECIATION	Pentapetalae	SPECIATION	0.087	False	0.089	-0.002	-0.26396	0.791811
44176	eudicotyledons	SPECIATION	Pentapetalae	SPECIATION	0.071	False	0.075	-0.004	-0.276849	0.781896
21404	eudicotyledons	SPECIATION	Pentapetalae	SPECIATION	0.105	False	0.092	0.013	-0.167287	0.867144
47957	eudicotyledons	SPECIATION	Pentapetalae	SPECIATION	0.098	False	0.075	0.023	-0.102839	0.918091
15561	eudicotyledons	SPECIATION	Pentapetalae	SPECIATION	0.12	False	0.102	0.018	-0.135063	0.892562
47319	eudicotyledons	SPECIATION	Pentapetalae	SPECIATION	0.055	False	0.078	-0.023	-0.399301	0.689672
47319	eudicotyledons	SPECIATION	Pentapetalae	SPECIATION	0.044	False	0.078	-0.034	-0.470194	0.638217
47319	eudicotyledons	SPECIATION	Pentapetalae	SPECIATION	0.269	True	0.078	0.191	0.979889	0.327141
47319	eudicotyledons	SPECIATION	Pentapetalae	SPECIATION	0.202	True	0.078	0.124	0.548087	0.583632
47319	eudicotyledons	SPECIATION	Pentapetalae	SPECIATION	0.053	False	0.078	-0.025	-0.41219	0.6802
11800	eudicotyledons	SPECIATION	Pentapetalae	SPECIATION	0.042	False	0.05	-0.008	-0.302628	0.762173
11800	eudicotyledons	SPECIATION	Pentapetalae	SPECIATION	0.049	False	0.05	-0.001	-0.257515	0.796781
13366	eudicotyledons	SPECIATION	Pentapetalae	SPECIATION	0.173	False	0.11	0.063	0.154953	0.876858
35991	eudicotyledons	SPECIATION	Pentapetalae	SPECIATION	0.183	False	0.151	0.032	-0.0448359	0.964238
45910	eudicotyledons	SPECIATION	Pentapetalae	SPECIATION	0.012	False	0.045	-0.033	-0.463749	0.642828
33648	eudicotyledons	SPECIATION	Pentapetalae	SPECIATION	0.075	False	0.105	-0.03	-0.444414	0.656743
11847	eudicotyledons	SPECIATION	Pentapetalae	SPECIATION	0.025	False	0.023	0.002	-0.23818	0.811741
46235	eudicotyledons	SPECIATION	Pentapetalae	SPECIATION	0.265	True	0.175	0.09	0.328963	0.742184
46235	eudicotyledons	SPECIATION	Pentapetalae	SPECIATION	0.192	True	0.175	0.017	-0.141508	0.887469
42826	eudicotyledons	SPECIATION	Pentapetalae	SPECIATION	0.035	False	0.044	-0.009	-0.309073	0.757266
42826	eudicotyledons	SPECIATION	Pentapetalae	SPECIATION	0.02	False	0.044	-0.024	-0.405745	0.68493
45643	eudicotyledons	SPECIATION	Pentapetalae	SPECIATION	0.126	True	0.16	-0.034	-0.470194	0.638217
45643	eudicotyledons	SPECIATION	Pentapetalae	SPECIATION	0.22	True	0.16	0.06	0.135619	0.892123
45643	eudicotyledons	SPECIATION	Pentapetalae	SPECIATION	0.195	True	0.16	0.035	-0.0255015	0.979655
45643	eudicotyledons	SPECIATION	Pentapetalae	SPECIATION	0.176	False	0.16	0.016	-0.147953	0.88238
45643	eudicotyledons	SPECIATION	Pentapetalae	SPECIATION	0.076	False	0.16	-0.084	-0.792434	0.428108
42980	eudicotyledons	SPECIATION	Pentapetalae	SPECIATION	0.058	False	0.033	0.025	-0.0899496	0.928327
31606	eudicotyledons	SPECIATION	Pentapetalae	SPECIATION	0.043	False	0.083	-0.04	-0.508862	0.610849
31485	eudicotyledons	SPECIATION	Pentapetalae	SPECIATION	0.038	False	0.067	-0.029	-0.437969	0.661408
31485	eudicotyledons	SPECIATION	Pentapetalae	SPECIATION	0.057	True	0.067	-0.01	-0.315518	0.752368
31485	eudicotyledons	SPECIATION	Pentapetalae	SPECIATION	0.072	True	0.067	0.005	-0.218846	0.82677
31485	eudicotyledons	SPECIATION	Pentapetalae	SPECIATION	0.034	False	0.067	-0.033	-0.463749	0.642828
13803	eudicotyledons	SPECIATION	Pentapetalae	SPECIATION	0.044	False	0.07	-0.026	-0.418635	0.675483
13803	eudicotyledons	SPECIATION	Pentapetalae	SPECIATION	0.035	False	0.07	-0.035	-0.476638	0.63362
13803	eudicotyledons	SPECIATION	Pentapetalae	SPECIATION	0.07	False	0.07	0	-0.25107	0.80176
10290	eudicotyledons	SPECIATION	Pentapetalae	SPECIATION	0.074	False	0.054	0.02	-0.122174	0.902761
43447	eudicotyledons	SPECIATION	Pentapetalae	SPECIATION	0.052	False	0.076	-0.024	-0.405745	0.68493
43447	eudicotyledons	SPECIATION	Pentapetalae	SPECIATION	0.012	False	0.076	-0.064	-0.663538	0.506986
43447	eudicotyledons	SPECIATION	Pentapetalae	SPECIATION	0.055	False	0.076	-0.021	-0.386411	0.699192
43447	eudicotyledons	SPECIATION	Pentapetalae	SPECIATION	0.096	False	0.076	0.02	-0.122174	0.902761
43447	eudicotyledons	SPECIATION	Pentapetalae	SPECIATION	0.191	True	0.076	0.115	0.490083	0.624075
43899	eudicotyledons	SPECIATION	Pentapetalae	SPECIATION	0.362	True	0.096	0.266	1.46325	0.143399
43899	eudicotyledons	SPECIATION	Pentapetalae	SPECIATION	0.49	True	0.096	0.394	2.28819	0.0221267
43899	eudicotyledons	SPECIATION	Pentapetalae	SPECIATION	0.089	True	0.096	-0.007	-0.296184	0.76709
45937	eudicotyledons	SPECIATION	Pentapetalae	SPECIATION	0.094	False	0.076	0.018	-0.135063	0.892562
36060	eudicotyledons	SPECIATION	Pentapetalae	SPECIATION	0.092	False	0.085	0.007	-0.205956	0.836825
44272	eudicotyledons	SPECIATION	Pentapetalae	SPECIATION	0.051	False	0.061	-0.01	-0.315518	0.752368
44272	eudicotyledons	SPECIATION	Pentapetalae	SPECIATION	0.036	False	0.061	-0.025	-0.41219	0.6802
21136	eudicotyledons	SPECIATION	Pentapetalae	SPECIATION	0.04	False	0.067	-0.027	-0.42508	0.670778
21136	eudicotyledons	SPECIATION	Pentapetalae	SPECIATION	0.045	False	0.067	-0.022	-0.392856	0.694426
21136	eudicotyledons	SPECIATION	Pentapetalae	SPECIATION	0.02	False	0.067	-0.047	-0.553976	0.579595
21136	eudicotyledons	SPECIATION	Pentapetalae	SPECIATION	0.106	True	0.067	0.039	0.000277753	0.999778
21136	eudicotyledons	SPECIATION	Pentapetalae	SPECIATION	0.024	True	0.067	-0.043	-0.528197	0.597363
21136	eudicotyledons	SPECIATION	Pentapetalae	SPECIATION	0.055	False	0.067	-0.012	-0.328408	0.742603
21136	eudicotyledons	SPECIATION	Pentapetalae	SPECIATION	0.039	False	0.067	-0.028	-0.431525	0.666087
47712	eudicotyledons	SPECIATION	Pentapetalae	SPECIATION	0.161	False	0.109	0.052	0.0840603	0.933008
42918	eudicotyledons	SPECIATION	Pentapetalae	SPECIATION	0.017	False	0.047	-0.03	-0.444414	0.656743
42918	eudicotyledons	SPECIATION	Pentapetalae	SPECIATION	0.06	False	0.047	0.013	-0.167287	0.867144
13923	eudicotyledons	SPECIATION	Pentapetalae	SPECIATION	0.078	False	0.081	-0.003	-0.270404	0.786849
46681	eudicotyledons	SPECIATION	Pentapetalae	SPECIATION	0.165	False	0.172	-0.007	-0.296184	0.76709
27005	eudicotyledons	SPECIATION	Pentapetalae	SPECIATION	0.221	True	0.113	0.108	0.44497	0.656342
27005	eudicotyledons	SPECIATION	Pentapetalae	SPECIATION	0.687	True	0.113	0.574	3.44825	0.000564227
27005	eudicotyledons	SPECIATION	Pentapetalae	SPECIATION	0.105	True	0.113	-0.008	-0.302628	0.762173
27005	eudicotyledons	SPECIATION	Pentapetalae	SPECIATION	0	False	0.113	-0.113	-0.979334	0.327415
27005	eudicotyledons	SPECIATION	Pentapetalae	SPECIATION	0.153	True	0.113	0.04	0.00672256	0.994636
27005	eudicotyledons	SPECIATION	Pentapetalae	SPECIATION	0.105	True	0.113	-0.008	-0.302628	0.762173
27005	eudicotyledons	SPECIATION	Pentapetalae	SPECIATION	0.054	False	0.113	-0.059	-0.631314	0.527835
27005	eudicotyledons	SPECIATION	Pentapetalae	SPECIATION	0.063	False	0.113	-0.05	-0.573311	0.566434
34131	eudicotyledons	SPECIATION	Pentapetalae	SPECIATION	0.166	False	0.099	0.067	0.180732	0.856578
34131	eudicotyledons	SPECIATION	Pentapetalae	SPECIATION	0.096	False	0.099	-0.003	-0.270404	0.786849
36319	eudicotyledons	SPECIATION	Pentapetalae	SPECIATION	0.036	False	0.051	-0.015	-0.347742	0.728034
31862	eudicotyledons	SPECIATION	Pentapetalae	SPECIATION	0.055	False	0.044	0.011	-0.180177	0.857014
33413	eudicotyledons	SPECIATION	Pentapetalae	SPECIATION	0.218	True	0.121	0.097	0.374077	0.708347
33413	eudicotyledons	SPECIATION	Pentapetalae	SPECIATION	0.197	True	0.121	0.076	0.238736	0.81131
33413	eudicotyledons	SPECIATION	Pentapetalae	SPECIATION	0.037	False	0.121	-0.084	-0.792434	0.428108
47863	eudicotyledons	SPECIATION	Pentapetalae	SPECIATION	0.534	True	0.29	0.244	1.32146	0.186347
47863	eudicotyledons	SPECIATION	Pentapetalae	SPECIATION	0.312	True	0.29	0.022	-0.109284	0.912977
12857	eudicotyledons	SPECIATION	Pentapetalae	SPECIATION	0.081	False	0.09	-0.009	-0.309073	0.757266
37210	eudicotyledons	SPECIATION	Pentapetalae	SPECIATION	0.198	False	0.214	-0.016	-0.354187	0.723199
14226	eudicotyledons	SPECIATION	Pentapetalae	SPECIATION	0.024	False	0.067	-0.043	-0.528197	0.597363
47258	eudicotyledons	SPECIATION	Pentapetalae	SPECIATION	0.106	False	0.134	-0.028	-0.431525	0.666087
47258	eudicotyledons	SPECIATION	Pentapetalae	SPECIATION	0.165	False	0.134	0.031	-0.0512807	0.959102
47255	eudicotyledons	SPECIATION	Pentapetalae	SPECIATION	0.098	False	0.197	-0.099	-0.889106	0.373946
12276	eudicotyledons	SPECIATION	Pentapetalae	SPECIATION	0.226	True	0.095	0.131	0.5932	0.553047
12276	eudicotyledons	SPECIATION	Pentapetalae	SPECIATION	0.136	True	0.095	0.041	0.0131674	0.989494
12276	eudicotyledons	SPECIATION	Pentapetalae	SPECIATION	0.064	False	0.095	-0.031	-0.450859	0.652091
12276	eudicotyledons	SPECIATION	Pentapetalae	SPECIATION	0.047	False	0.095	-0.048	-0.560421	0.575192
35100	eudicotyledons	SPECIATION	Pentapetalae	SPECIATION	0.069	False	0.087	-0.018	-0.367077	0.713562
10394	eudicotyledons	SPECIATION	Pentapetalae	SPECIATION	0.064	True	0.031	0.033	-0.0383911	0.969376
10394	eudicotyledons	SPECIATION	Pentapetalae	SPECIATION	0.026	True	0.031	-0.005	-0.283294	0.776951
24413	eudicotyledons	SPECIATION	Pentapetalae	SPECIATION	0.078	False	0.122	-0.044	-0.534642	0.592898
33591	eudicotyledons	SPECIATION	Pentapetalae	SPECIATION	0.086	False	0.083	0.003	-0.231735	0.816743
33591	eudicotyledons	SPECIATION	Pentapetalae	SPECIATION	0.08	False	0.083	-0.003	-0.270404	0.786849
12980	eudicotyledons	SPECIATION	Pentapetalae	SPECIATION	0.056	False	0.068	-0.012	-0.328408	0.742603
12904	eudicotyledons	SPECIATION	Pentapetalae	SPECIATION	0.157	False	0.154	0.003	-0.231735	0.816743
10802	eudicotyledons	SPECIATION	Pentapetalae	SPECIATION	0.1	True	0.073	0.027	-0.07706	0.938576
10802	eudicotyledons	SPECIATION	Pentapetalae	SPECIATION	0.03	True	0.073	-0.043	-0.528197	0.597363
46213	eudicotyledons	SPECIATION	Pentapetalae	SPECIATION	0.059	False	0.158	-0.099	-0.889106	0.373946
13793	eudicotyledons	SPECIATION	Pentapetalae	SPECIATION	0.064	False	0.099	-0.035	-0.476638	0.63362
13793	eudicotyledons	SPECIATION	Pentapetalae	SPECIATION	0.186	True	0.099	0.087	0.309629	0.756843
13793	eudicotyledons	SPECIATION	Pentapetalae	SPECIATION	0.092	True	0.099	-0.007	-0.296184	0.76709
13793	eudicotyledons	SPECIATION	Pentapetalae	SPECIATION	0.185	False	0.099	0.086	0.303184	0.76175
13793	eudicotyledons	SPECIATION	Pentapetalae	SPECIATION	0.136	False	0.099	0.037	-0.0126119	0.989937
13793	eudicotyledons	SPECIATION	Pentapetalae	SPECIATION	0.129	False	0.099	0.03	-0.0577256	0.953967
47539	eudicotyledons	SPECIATION	Pentapetalae	SPECIATION	0.141	False	0.109	0.032	-0.0448359	0.964238
43943	eudicotyledons	SPECIATION	Pentapetalae	SPECIATION	0.046	False	0.072	-0.026	-0.418635	0.675483
45747	eudicotyledons	SPECIATION	Pentapetalae	SPECIATION	0.113	False	0.092	0.021	-0.115729	0.907867
45747	eudicotyledons	SPECIATION	Pentapetalae	SPECIATION	0.072	False	0.092	-0.02	-0.379966	0.703971
31251	eudicotyledons	SPECIATION	Pentapetalae	SPECIATION	0.05	False	0.138	-0.088	-0.818213	0.413235
31251	eudicotyledons	SPECIATION	Pentapetalae	SPECIATION	0.136	True	0.138	-0.002	-0.26396	0.791811
31251	eudicotyledons	SPECIATION	Pentapetalae	SPECIATION	0.131	True	0.138	-0.007	-0.296184	0.76709
31251	eudicotyledons	SPECIATION	Pentapetalae	SPECIATION	0.073	False	0.138	-0.065	-0.669983	0.502869
31251	eudicotyledons	SPECIATION	Pentapetalae	SPECIATION	0.292	True	0.138	0.154	0.741431	0.458432
31251	eudicotyledons	SPECIATION	Pentapetalae	SPECIATION	0.222	True	0.138	0.084	0.290294	0.771591
31251	eudicotyledons	SPECIATION	Pentapetalae	SPECIATION	0.245	False	0.138	0.107	0.438525	0.661006
31251	eudicotyledons	SPECIATION	Pentapetalae	SPECIATION	0.815	True	0.138	0.677	4.11207	3.92131e-05
31251	eudicotyledons	SPECIATION	Pentapetalae	SPECIATION	0.111	True	0.138	-0.027	-0.42508	0.670778
31251	eudicotyledons	SPECIATION	Pentapetalae	SPECIATION	0.134	False	0.138	-0.004	-0.276849	0.781896
31251	eudicotyledons	SPECIATION	Pentapetalae	SPECIATION	0.025	False	0.138	-0.113	-0.979334	0.327415
31251	eudicotyledons	SPECIATION	Pentapetalae	SPECIATION	0.079	False	0.138	-0.059	-0.631314	0.527835
31251	eudicotyledons	SPECIATION	Pentapetalae	SPECIATION	0.119	True	0.138	-0.019	-0.373521	0.70876
31251	eudicotyledons	SPECIATION	Pentapetalae	SPECIATION	0.124	True	0.138	-0.014	-0.341297	0.73288
12363	eudicotyledons	SPECIATION	Pentapetalae	SPECIATION	0.089	False	0.106	-0.017	-0.360632	0.718375
12363	eudicotyledons	SPECIATION	Pentapetalae	SPECIATION	0.061	False	0.106	-0.045	-0.541086	0.588448
47996	eudicotyledons	SPECIATION	Pentapetalae	SPECIATION	0.146	False	0.129	0.017	-0.141508	0.887469
48065	eudicotyledons	SPECIATION	Pentapetalae	SPECIATION	0.655	True	0.204	0.451	2.65554	0.00791815
48065	eudicotyledons	SPECIATION	Pentapetalae	SPECIATION	0.771	True	0.204	0.567	3.40314	0.000666165
48065	eudicotyledons	SPECIATION	Pentapetalae	SPECIATION	0.397	True	0.204	0.193	0.992779	0.320818
13007	eudicotyledons	SPECIATION	Pentapetalae	SPECIATION	0.069	False	0.066	0.003	-0.231735	0.816743
10408	eudicotyledons	SPECIATION	Pentapetalae	SPECIATION	0.067	False	0.069	-0.002	-0.26396	0.791811
45286	eudicotyledons	SPECIATION	Pentapetalae	SPECIATION	0.138	False	0.121	0.017	-0.141508	0.887469
36363	eudicotyledons	SPECIATION	Pentapetalae	SPECIATION	0.049	False	0.077	-0.028	-0.431525	0.666087
45764	eudicotyledons	SPECIATION	Pentapetalae	SPECIATION	0.117	True	0.153	-0.036	-0.483083	0.629037
45764	eudicotyledons	SPECIATION	Pentapetalae	SPECIATION	0.284	True	0.153	0.131	0.5932	0.553047
45764	eudicotyledons	SPECIATION	Pentapetalae	SPECIATION	0.827	True	0.153	0.674	4.09273	4.26318e-05
45764	eudicotyledons	SPECIATION	Pentapetalae	SPECIATION	0.141	True	0.153	-0.012	-0.328408	0.742603
45764	eudicotyledons	SPECIATION	Pentapetalae	SPECIATION	0.334	True	0.153	0.181	0.915441	0.35996
45764	eudicotyledons	SPECIATION	Pentapetalae	SPECIATION	0.27	True	0.153	0.117	0.502973	0.614983
42769	eudicotyledons	SPECIATION	Pentapetalae	SPECIATION	0.103	False	0.054	0.049	0.0647259	0.948392
42769	eudicotyledons	SPECIATION	Pentapetalae	SPECIATION	0.151	True	0.054	0.097	0.374077	0.708347
42769	eudicotyledons	SPECIATION	Pentapetalae	SPECIATION	0.129	True	0.054	0.075	0.232291	0.816312
45995	eudicotyledons	SPECIATION	Pentapetalae	SPECIATION	0.035	False	0.043	-0.008	-0.302628	0.762173
46446	eudicotyledons	SPECIATION	Pentapetalae	SPECIATION	0.025	False	0.059	-0.034	-0.470194	0.638217
10701	eudicotyledons	SPECIATION	Pentapetalae	SPECIATION	0.06	False	0.046	0.014	-0.160843	0.872217
10701	eudicotyledons	SPECIATION	Pentapetalae	SPECIATION	0.026	False	0.046	-0.02	-0.379966	0.703971
12714	eudicotyledons	SPECIATION	Pentapetalae	SPECIATION	0.065	False	0.081	-0.016	-0.354187	0.723199
12714	eudicotyledons	SPECIATION	Pentapetalae	SPECIATION	0.156	False	0.081	0.075	0.232291	0.816312
12714	eudicotyledons	SPECIATION	Pentapetalae	SPECIATION	0.085	False	0.081	0.004	-0.225291	0.821753
23133	eudicotyledons	SPECIATION	Pentapetalae	SPECIATION	0.005	False	0.039	-0.034	-0.470194	0.638217
47856	eudicotyledons	SPECIATION	Pentapetalae	SPECIATION	0.137	False	0.053	0.084	0.290294	0.771591
47201	eudicotyledons	SPECIATION	Pentapetalae	SPECIATION	0.258	True	0.086	0.172	0.857438	0.391203
47201	eudicotyledons	SPECIATION	Pentapetalae	SPECIATION	0.215	True	0.086	0.129	0.580311	0.561705
21071	eudicotyledons	SPECIATION	Pentapetalae	SPECIATION	0.062	False	0.07	-0.008	-0.302628	0.762173
46101	eudicotyledons	SPECIATION	Pentapetalae	SPECIATION	0.026	False	0.077	-0.051	-0.579755	0.56208
48235	eudicotyledons	SPECIATION	Pentapetalae	SPECIATION	0.208	False	0.17	0.038	-0.00616706	0.995079
31084	eudicotyledons	SPECIATION	Pentapetalae	SPECIATION	0.078	False	0.068	0.01	-0.186622	0.851957
45666	eudicotyledons	SPECIATION	Pentapetalae	SPECIATION	0.079	False	0.069	0.01	-0.186622	0.851957
45666	eudicotyledons	SPECIATION	Pentapetalae	SPECIATION	0.045	False	0.069	-0.024	-0.405745	0.68493
45666	eudicotyledons	SPECIATION	Pentapetalae	SPECIATION	0.106	False	0.069	0.037	-0.0126119	0.989937
45666	eudicotyledons	SPECIATION	Pentapetalae	SPECIATION	0.036	False	0.069	-0.033	-0.463749	0.642828
45666	eudicotyledons	SPECIATION	Pentapetalae	SPECIATION	0.248	True	0.069	0.179	0.902551	0.366764
45666	eudicotyledons	SPECIATION	Pentapetalae	SPECIATION	0.144	True	0.069	0.075	0.232291	0.816312
45666	eudicotyledons	SPECIATION	Pentapetalae	SPECIATION	0.056	False	0.069	-0.013	-0.334852	0.737736
45666	eudicotyledons	SPECIATION	Pentapetalae	SPECIATION	0.077	False	0.069	0.008	-0.199511	0.841863
45666	eudicotyledons	SPECIATION	Pentapetalae	SPECIATION	0.052	False	0.069	-0.017	-0.360632	0.718375
10871	eudicotyledons	SPECIATION	Pentapetalae	SPECIATION	0.024	False	0.041	-0.017	-0.360632	0.718375
10871	eudicotyledons	SPECIATION	Pentapetalae	SPECIATION	0.008	False	0.041	-0.033	-0.463749	0.642828
10871	eudicotyledons	SPECIATION	Pentapetalae	SPECIATION	0.027	False	0.041	-0.014	-0.341297	0.73288
46803	eudicotyledons	SPECIATION	Pentapetalae	SPECIATION	0.064	False	0.079	-0.015	-0.347742	0.728034
11038	eudicotyledons	SPECIATION	Pentapetalae	SPECIATION	0.039	False	0.053	-0.014	-0.341297	0.73288
11525	eudicotyledons	SPECIATION	Pentapetalae	SPECIATION	0.054	False	0.071	-0.017	-0.360632	0.718375
12640	eudicotyledons	SPECIATION	Pentapetalae	SPECIATION	0.075	False	0.091	-0.016	-0.354187	0.723199
47717	eudicotyledons	SPECIATION	Pentapetalae	SPECIATION	0.071	False	0.057	0.014	-0.160843	0.872217
13887	eudicotyledons	SPECIATION	Pentapetalae	SPECIATION	0.082	False	0.086	-0.004	-0.276849	0.781896
13251	eudicotyledons	SPECIATION	Pentapetalae	SPECIATION	0.057	False	0.1	-0.043	-0.528197	0.597363
15197	eudicotyledons	SPECIATION	Pentapetalae	SPECIATION	0.231	False	0.193	0.038	-0.00616706	0.995079
35461	eudicotyledons	SPECIATION	Pentapetalae	SPECIATION	0.422	True	0.189	0.233	1.25057	0.211091
35461	eudicotyledons	SPECIATION	Pentapetalae	SPECIATION	0.308	True	0.189	0.119	0.515863	0.60595
14795	eudicotyledons	SPECIATION	Pentapetalae	SPECIATION	0.15	False	0.1	0.05	0.0711707	0.943262
47367	eudicotyledons	SPECIATION	Pentapetalae	SPECIATION	0.263	False	0.075	0.188	0.960555	0.336776
47435	eudicotyledons	SPECIATION	Pentapetalae	SPECIATION	0.134	False	0.114	0.02	-0.122174	0.902761
36321	eudicotyledons	SPECIATION	Pentapetalae	SPECIATION	0.454	True	0.24	0.214	1.12812	0.259269
36321	eudicotyledons	SPECIATION	Pentapetalae	SPECIATION	0.218	True	0.24	-0.022	-0.392856	0.694426
14027	eudicotyledons	SPECIATION	Pentapetalae	SPECIATION	0.051	False	0.07	-0.019	-0.373521	0.70876
11746	eudicotyledons	SPECIATION	Pentapetalae	SPECIATION	0.042	False	0.151	-0.109	-0.953554	0.340309
11746	eudicotyledons	SPECIATION	Pentapetalae	SPECIATION	0.11	False	0.151	-0.041	-0.515307	0.606338
11746	eudicotyledons	SPECIATION	Pentapetalae	SPECIATION	0.397	True	0.151	0.246	1.33435	0.182088
11746	eudicotyledons	SPECIATION	Pentapetalae	SPECIATION	0.259	True	0.151	0.108	0.44497	0.656342
11746	eudicotyledons	SPECIATION	Pentapetalae	SPECIATION	0.482	True	0.151	0.331	1.88216	0.0598139
11746	eudicotyledons	SPECIATION	Pentapetalae	SPECIATION	0.216	True	0.151	0.065	0.167843	0.866707
11746	eudicotyledons	SPECIATION	Pentapetalae	SPECIATION	0.239	True	0.151	0.088	0.316074	0.751947
11746	eudicotyledons	SPECIATION	Pentapetalae	SPECIATION	0.378	True	0.151	0.227	1.2119	0.22555
11746	eudicotyledons	SPECIATION	Pentapetalae	SPECIATION	0.092	True	0.151	-0.059	-0.631314	0.527835
44083	eudicotyledons	SPECIATION	Pentapetalae	SPECIATION	0.048	False	0.068	-0.02	-0.379966	0.703971
44083	eudicotyledons	SPECIATION	Pentapetalae	SPECIATION	0.026	False	0.068	-0.042	-0.521752	0.601843
44083	eudicotyledons	SPECIATION	Pentapetalae	SPECIATION	0.108	True	0.068	0.04	0.00672256	0.994636
44083	eudicotyledons	SPECIATION	Pentapetalae	SPECIATION	0.09	True	0.068	0.022	-0.109284	0.912977
44083	eudicotyledons	SPECIATION	Pentapetalae	SPECIATION	0.03	False	0.068	-0.038	-0.495973	0.619914
31953	eudicotyledons	SPECIATION	Pentapetalae	SPECIATION	0.131	False	0.105	0.026	-0.0835048	0.93345
31953	eudicotyledons	SPECIATION	Pentapetalae	SPECIATION	0.092	False	0.105	-0.013	-0.334852	0.737736
31953	eudicotyledons	SPECIATION	Pentapetalae	SPECIATION	0.101	False	0.105	-0.004	-0.276849	0.781896
31953	eudicotyledons	SPECIATION	Pentapetalae	SPECIATION	0.075	False	0.105	-0.03	-0.444414	0.656743
31029	eudicotyledons	SPECIATION	Pentapetalae	SPECIATION	0.076	False	0.121	-0.045	-0.541086	0.588448
31029	eudicotyledons	SPECIATION	Pentapetalae	SPECIATION	0.066	False	0.121	-0.055	-0.605535	0.544824
46668	eudicotyledons	SPECIATION	Pentapetalae	SPECIATION	0.018	False	0.042	-0.024	-0.405745	0.68493
46701	eudicotyledons	SPECIATION	Pentapetalae	SPECIATION	0.047	True	0.053	-0.006	-0.289739	0.772016
46701	eudicotyledons	SPECIATION	Pentapetalae	SPECIATION	0.047	True	0.053	-0.006	-0.289739	0.772016
31756	eudicotyledons	SPECIATION	Pentapetalae	SPECIATION	0.046	False	0.059	-0.013	-0.334852	0.737736
37604	eudicotyledons	SPECIATION	Pentapetalae	SPECIATION	0.202	False	0.12	0.082	0.277405	0.781469
35709	eudicotyledons	SPECIATION	Pentapetalae	SPECIATION	0.019	False	0.069	-0.05	-0.573311	0.566434
34355	eudicotyledons	SPECIATION	Pentapetalae	SPECIATION	0.478	True	0.178	0.3	1.68237	0.0924964
34355	eudicotyledons	SPECIATION	Pentapetalae	SPECIATION	0.367	True	0.178	0.189	0.967	0.333544
19384	eudicotyledons	SPECIATION	Pentapetalae	SPECIATION	0.12	False	0.066	0.054	0.0969499	0.922766
19384	eudicotyledons	SPECIATION	Pentapetalae	SPECIATION	0.049	False	0.066	-0.017	-0.360632	0.718375
19384	eudicotyledons	SPECIATION	Pentapetalae	SPECIATION	0.041	False	0.066	-0.025	-0.41219	0.6802
15967	eudicotyledons	SPECIATION	Pentapetalae	SPECIATION	0.174	False	0.08	0.094	0.354742	0.722783
11353	eudicotyledons	SPECIATION	Pentapetalae	SPECIATION	0.011	False	0.03	-0.019	-0.373521	0.70876
11353	eudicotyledons	SPECIATION	Pentapetalae	SPECIATION	0.041	False	0.03	0.011	-0.180177	0.857014
11353	eudicotyledons	SPECIATION	Pentapetalae	SPECIATION	0.017	False	0.03	-0.013	-0.334852	0.737736
11353	eudicotyledons	SPECIATION	Pentapetalae	SPECIATION	0.017	False	0.03	-0.013	-0.334852	0.737736
11353	eudicotyledons	SPECIATION	Pentapetalae	SPECIATION	0.004	False	0.03	-0.026	-0.418635	0.675483
11353	eudicotyledons	SPECIATION	Pentapetalae	SPECIATION	0.025	False	0.03	-0.005	-0.283294	0.776951
11353	eudicotyledons	SPECIATION	Pentapetalae	SPECIATION	0.011	False	0.03	-0.019	-0.373521	0.70876
11353	eudicotyledons	SPECIATION	Pentapetalae	SPECIATION	0.006	False	0.03	-0.024	-0.405745	0.68493
35774	eudicotyledons	SPECIATION	Pentapetalae	SPECIATION	0	False	0.026	-0.026	-0.418635	0.675483
45274	eudicotyledons	SPECIATION	Pentapetalae	SPECIATION	0.085	False	0.079	0.006	-0.212401	0.831794
47999	eudicotyledons	SPECIATION	Pentapetalae	SPECIATION	0.016	False	0.08	-0.064	-0.663538	0.506986
47999	eudicotyledons	SPECIATION	Pentapetalae	SPECIATION	0.016	False	0.08	-0.064	-0.663538	0.506986
47999	eudicotyledons	SPECIATION	Pentapetalae	SPECIATION	0.032	False	0.08	-0.048	-0.560421	0.575192
47999	eudicotyledons	SPECIATION	Pentapetalae	SPECIATION	0.096	False	0.08	0.016	-0.147953	0.88238
47999	eudicotyledons	SPECIATION	Pentapetalae	SPECIATION	0.033	False	0.08	-0.047	-0.553976	0.579595
47999	eudicotyledons	SPECIATION	Pentapetalae	SPECIATION	0.019	False	0.08	-0.061	-0.644203	0.519444
47999	eudicotyledons	SPECIATION	Pentapetalae	SPECIATION	0.009	False	0.08	-0.071	-0.708652	0.478541
47999	eudicotyledons	SPECIATION	Pentapetalae	SPECIATION	0.115	True	0.08	0.035	-0.0255015	0.979655
47999	eudicotyledons	SPECIATION	Pentapetalae	SPECIATION	0.052	True	0.08	-0.028	-0.431525	0.666087
47999	eudicotyledons	SPECIATION	Pentapetalae	SPECIATION	0.109	False	0.08	0.029	-0.0641704	0.948835
47999	eudicotyledons	SPECIATION	Pentapetalae	SPECIATION	0.044	False	0.08	-0.036	-0.483083	0.629037
47999	eudicotyledons	SPECIATION	Pentapetalae	SPECIATION	0.033	False	0.08	-0.047	-0.553976	0.579595
47999	eudicotyledons	SPECIATION	Pentapetalae	SPECIATION	0.382	True	0.08	0.302	1.69526	0.0900255
47999	eudicotyledons	SPECIATION	Pentapetalae	SPECIATION	0.094	True	0.08	0.014	-0.160843	0.872217
47999	eudicotyledons	SPECIATION	Pentapetalae	SPECIATION	0.017	False	0.08	-0.063	-0.657093	0.511121
47999	eudicotyledons	SPECIATION	Pentapetalae	SPECIATION	0	False	0.08	-0.08	-0.766655	0.443287
46633	eudicotyledons	SPECIATION	Pentapetalae	SPECIATION	0.063	False	0.07	-0.007	-0.296184	0.76709
46633	eudicotyledons	SPECIATION	Pentapetalae	SPECIATION	0.053	False	0.07	-0.017	-0.360632	0.718375
18860	eudicotyledons	SPECIATION	Pentapetalae	SPECIATION	0.091	True	0.046	0.045	0.0389466	0.968933
18860	eudicotyledons	SPECIATION	Pentapetalae	SPECIATION	0.046	True	0.046	0	-0.25107	0.80176
18860	eudicotyledons	SPECIATION	Pentapetalae	SPECIATION	0.061	True	0.046	0.015	-0.154398	0.877296
18860	eudicotyledons	SPECIATION	Pentapetalae	SPECIATION	0.042	True	0.046	-0.004	-0.276849	0.781896
18860	eudicotyledons	SPECIATION	Pentapetalae	SPECIATION	0.018	False	0.046	-0.028	-0.431525	0.666087
18860	eudicotyledons	SPECIATION	Pentapetalae	SPECIATION	0.209	True	0.046	0.163	0.799434	0.424039
18860	eudicotyledons	SPECIATION	Pentapetalae	SPECIATION	0.017	True	0.046	-0.029	-0.437969	0.661408
18860	eudicotyledons	SPECIATION	Pentapetalae	SPECIATION	0.051	False	0.046	0.005	-0.218846	0.82677
18860	eudicotyledons	SPECIATION	Pentapetalae	SPECIATION	0.031	False	0.046	-0.015	-0.347742	0.728034
47697	eudicotyledons	SPECIATION	Pentapetalae	SPECIATION	0.138	False	0.102	0.036	-0.0190567	0.984796
15970	eudicotyledons	SPECIATION	Pentapetalae	SPECIATION	0.112	False	0.097	0.015	-0.154398	0.877296
37213	eudicotyledons	SPECIATION	Pentapetalae	SPECIATION	0.014	False	0.079	-0.065	-0.669983	0.502869
19375	eudicotyledons	SPECIATION	Pentapetalae	SPECIATION	0.081	False	0.045	0.036	-0.0190567	0.984796
19375	eudicotyledons	SPECIATION	Pentapetalae	SPECIATION	0.024	True	0.045	-0.021	-0.386411	0.699192
19375	eudicotyledons	SPECIATION	Pentapetalae	SPECIATION	0.02	True	0.045	-0.025	-0.41219	0.6802
19375	eudicotyledons	SPECIATION	Pentapetalae	SPECIATION	0.016	False	0.045	-0.029	-0.437969	0.661408
19375	eudicotyledons	SPECIATION	Pentapetalae	SPECIATION	0.013	False	0.045	-0.032	-0.457304	0.647453
19375	eudicotyledons	SPECIATION	Pentapetalae	SPECIATION	0.013	False	0.045	-0.032	-0.457304	0.647453
19375	eudicotyledons	SPECIATION	Pentapetalae	SPECIATION	0.002	False	0.045	-0.043	-0.528197	0.597363
13002	eudicotyledons	SPECIATION	Pentapetalae	SPECIATION	0.081	False	0.098	-0.017	-0.360632	0.718375
18896	eudicotyledons	SPECIATION	Pentapetalae	SPECIATION	0.107	False	0.064	0.043	0.026057	0.979212
18896	eudicotyledons	SPECIATION	Pentapetalae	SPECIATION	0.152	True	0.064	0.088	0.316074	0.751947
18896	eudicotyledons	SPECIATION	Pentapetalae	SPECIATION	0.06	True	0.064	-0.004	-0.276849	0.781896
18896	eudicotyledons	SPECIATION	Pentapetalae	SPECIATION	0.049	False	0.064	-0.015	-0.347742	0.728034
18896	eudicotyledons	SPECIATION	Pentapetalae	SPECIATION	0.028	False	0.064	-0.036	-0.483083	0.629037
18896	eudicotyledons	SPECIATION	Pentapetalae	SPECIATION	0.086	False	0.064	0.022	-0.109284	0.912977
18896	eudicotyledons	SPECIATION	Pentapetalae	SPECIATION	0.139	True	0.064	0.075	0.232291	0.816312
18896	eudicotyledons	SPECIATION	Pentapetalae	SPECIATION	0.097	True	0.064	0.033	-0.0383911	0.969376
18896	eudicotyledons	SPECIATION	Pentapetalae	SPECIATION	0.11	True	0.064	0.046	0.0453914	0.963795
18896	eudicotyledons	SPECIATION	Pentapetalae	SPECIATION	0.062	True	0.064	-0.002	-0.26396	0.791811
11757	eudicotyledons	SPECIATION	Pentapetalae	SPECIATION	0.13	False	0.081	0.049	0.0647259	0.948392
11757	eudicotyledons	SPECIATION	Pentapetalae	SPECIATION	0.081	False	0.081	0	-0.25107	0.80176
11757	eudicotyledons	SPECIATION	Pentapetalae	SPECIATION	0.054	False	0.081	-0.027	-0.42508	0.670778
24203	eudicotyledons	SPECIATION	Pentapetalae	SPECIATION	0.049	False	0.119	-0.07	-0.702207	0.48255
24203	eudicotyledons	SPECIATION	Pentapetalae	SPECIATION	0.07	False	0.119	-0.049	-0.566866	0.570805
24203	eudicotyledons	SPECIATION	Pentapetalae	SPECIATION	0.021	False	0.119	-0.098	-0.882661	0.377419
24203	eudicotyledons	SPECIATION	Pentapetalae	SPECIATION	0.252	True	0.119	0.133	0.60609	0.544455
24203	eudicotyledons	SPECIATION	Pentapetalae	SPECIATION	0.215	True	0.119	0.096	0.367632	0.713148
24203	eudicotyledons	SPECIATION	Pentapetalae	SPECIATION	0.487	False	0.119	0.368	2.12062	0.0339537
31371	eudicotyledons	SPECIATION	Pentapetalae	SPECIATION	0.281	True	0.104	0.177	0.889662	0.373648
31371	eudicotyledons	SPECIATION	Pentapetalae	SPECIATION	0.294	True	0.104	0.19	0.973444	0.330333
31371	eudicotyledons	SPECIATION	Pentapetalae	SPECIATION	0.096	False	0.104	-0.008	-0.302628	0.762173
31371	eudicotyledons	SPECIATION	Pentapetalae	SPECIATION	0.157	False	0.104	0.053	0.0905051	0.927886
31371	eudicotyledons	SPECIATION	Pentapetalae	SPECIATION	0.05	False	0.104	-0.054	-0.59909	0.549113
31104	eudicotyledons	SPECIATION	Pentapetalae	SPECIATION	0.111	False	0.129	-0.018	-0.367077	0.713562
31104	eudicotyledons	SPECIATION	Pentapetalae	SPECIATION	0.115	False	0.129	-0.014	-0.341297	0.73288
13624	eudicotyledons	SPECIATION	Pentapetalae	SPECIATION	0.217	False	0.1	0.117	0.502973	0.614983
20852	eudicotyledons	SPECIATION	Pentapetalae	SPECIATION	0.024	False	0.036	-0.012	-0.328408	0.742603
20852	eudicotyledons	SPECIATION	Pentapetalae	SPECIATION	0.018	False	0.036	-0.018	-0.367077	0.713562
12834	eudicotyledons	SPECIATION	Pentapetalae	SPECIATION	0.025	False	0.057	-0.032	-0.457304	0.647453
46809	eudicotyledons	SPECIATION	Pentapetalae	SPECIATION	0.044	False	0.065	-0.021	-0.386411	0.699192
23168	eudicotyledons	SPECIATION	Pentapetalae	SPECIATION	0.126	False	0.129	-0.003	-0.270404	0.786849
13457	eudicotyledons	SPECIATION	Pentapetalae	SPECIATION	0.153	False	0.106	0.047	0.0518362	0.958659
10412	eudicotyledons	SPECIATION	Pentapetalae	SPECIATION	0.11	False	0.07	0.04	0.00672256	0.994636
37261	eudicotyledons	SPECIATION	Pentapetalae	SPECIATION	0.213	False	0.23	-0.017	-0.360632	0.718375
31587	eudicotyledons	SPECIATION	Pentapetalae	SPECIATION	0.123	False	0.143	-0.02	-0.379966	0.703971
31587	eudicotyledons	SPECIATION	Pentapetalae	SPECIATION	0.164	False	0.143	0.021	-0.115729	0.907867
31134	eudicotyledons	SPECIATION	Pentapetalae	SPECIATION	0.127	False	0.097	0.03	-0.0577256	0.953967
11587	eudicotyledons	SPECIATION	Pentapetalae	SPECIATION	0.008	False	0.041	-0.033	-0.463749	0.642828
46468	eudicotyledons	SPECIATION	Pentapetalae	SPECIATION	0.123	False	0.13	-0.007	-0.296184	0.76709
35728	eudicotyledons	SPECIATION	Pentapetalae	SPECIATION	0.098	False	0.133	-0.035	-0.476638	0.63362
47457	eudicotyledons	SPECIATION	Pentapetalae	SPECIATION	0.124	False	0.077	0.047	0.0518362	0.958659
32379	eudicotyledons	SPECIATION	Pentapetalae	SPECIATION	0.059	False	0.053	0.006	-0.212401	0.831794
32166	eudicotyledons	SPECIATION	Pentapetalae	SPECIATION	0.126	False	0.141	-0.015	-0.347742	0.728034
32166	eudicotyledons	SPECIATION	Pentapetalae	SPECIATION	0.066	False	0.141	-0.075	-0.734431	0.462686
32166	eudicotyledons	SPECIATION	Pentapetalae	SPECIATION	0.039	False	0.141	-0.102	-0.908441	0.363645
32166	eudicotyledons	SPECIATION	Pentapetalae	SPECIATION	0.1	False	0.141	-0.041	-0.515307	0.606338
32166	eudicotyledons	SPECIATION	Pentapetalae	SPECIATION	0.204	False	0.141	0.063	0.154953	0.876858
32166	eudicotyledons	SPECIATION	Pentapetalae	SPECIATION	0.148	False	0.141	0.007	-0.205956	0.836825
32166	eudicotyledons	SPECIATION	Pentapetalae	SPECIATION	0.246	False	0.141	0.105	0.425635	0.670374
32166	eudicotyledons	SPECIATION	Pentapetalae	SPECIATION	0.132	True	0.141	-0.009	-0.309073	0.757266
32166	eudicotyledons	SPECIATION	Pentapetalae	SPECIATION	0.121	True	0.141	-0.02	-0.379966	0.703971
10638	eudicotyledons	SPECIATION	Pentapetalae	SPECIATION	0.399	True	0.071	0.328	1.86283	0.0624864
10638	eudicotyledons	SPECIATION	Pentapetalae	SPECIATION	0.223	True	0.071	0.152	0.728541	0.466282
10638	eudicotyledons	SPECIATION	Pentapetalae	SPECIATION	0.218	True	0.071	0.147	0.696317	0.48623
10638	eudicotyledons	SPECIATION	Pentapetalae	SPECIATION	0.149	True	0.071	0.078	0.251625	0.801331
10638	eudicotyledons	SPECIATION	Pentapetalae	SPECIATION	0.044	True	0.071	-0.027	-0.42508	0.670778
10638	eudicotyledons	SPECIATION	Pentapetalae	SPECIATION	0.042	True	0.071	-0.029	-0.437969	0.661408
12790	eudicotyledons	SPECIATION	Pentapetalae	SPECIATION	0.113	False	0.097	0.016	-0.147953	0.88238
37221	eudicotyledons	SPECIATION	Pentapetalae	SPECIATION	0.168	False	0.167	0.001	-0.244625	0.806747
36371	eudicotyledons	SPECIATION	Pentapetalae	SPECIATION	0.084	False	0.082	0.002	-0.23818	0.811741
37723	eudicotyledons	SPECIATION	Pentapetalae	SPECIATION	0.29	False	0.243	0.047	0.0518362	0.958659
31458	eudicotyledons	SPECIATION	Pentapetalae	SPECIATION	0.197	True	0.119	0.078	0.251625	0.801331
31458	eudicotyledons	SPECIATION	Pentapetalae	SPECIATION	0.149	True	0.119	0.03	-0.0577256	0.953967
20889	eudicotyledons	SPECIATION	Pentapetalae	SPECIATION	0.232	True	0.093	0.139	0.644759	0.519083
20889	eudicotyledons	SPECIATION	Pentapetalae	SPECIATION	0.143	True	0.093	0.05	0.0711707	0.943262
46837	eudicotyledons	SPECIATION	Pentapetalae	SPECIATION	0.103	False	0.142	-0.039	-0.502418	0.615374
14386	eudicotyledons	SPECIATION	Pentapetalae	SPECIATION	0.143	False	0.135	0.008	-0.199511	0.841863
11686	eudicotyledons	SPECIATION	Pentapetalae	SPECIATION	0.08	False	0.098	-0.018	-0.367077	0.713562
11686	eudicotyledons	SPECIATION	Pentapetalae	SPECIATION	0.093	False	0.098	-0.005	-0.283294	0.776951
43527	eudicotyledons	SPECIATION	Pentapetalae	SPECIATION	0.054	False	0.059	-0.005	-0.283294	0.776951
11749	eudicotyledons	SPECIATION	Pentapetalae	SPECIATION	0.039	False	0.045	-0.006	-0.289739	0.772016
11749	eudicotyledons	SPECIATION	Pentapetalae	SPECIATION	0.014	False	0.045	-0.031	-0.450859	0.652091
14021	eudicotyledons	SPECIATION	Pentapetalae	SPECIATION	0.112	False	0.098	0.014	-0.160843	0.872217
35761	eudicotyledons	SPECIATION	Pentapetalae	SPECIATION	0.283	False	0.183	0.1	0.393411	0.694016
43072	eudicotyledons	SPECIATION	Pentapetalae	SPECIATION	0.092	False	0.111	-0.019	-0.373521	0.70876
13808	eudicotyledons	SPECIATION	Pentapetalae	SPECIATION	0.521	True	0.089	0.432	2.53309	0.0113062
13808	eudicotyledons	SPECIATION	Pentapetalae	SPECIATION	0.026	True	0.089	-0.063	-0.657093	0.511121
15350	eudicotyledons	SPECIATION	Pentapetalae	SPECIATION	0.035	False	0.073	-0.038	-0.495973	0.619914
15350	eudicotyledons	SPECIATION	Pentapetalae	SPECIATION	0.036	False	0.073	-0.037	-0.489528	0.624468
17605	eudicotyledons	SPECIATION	Pentapetalae	SPECIATION	0.08	False	0.056	0.024	-0.0963944	0.923207
24104	eudicotyledons	SPECIATION	Pentapetalae	SPECIATION	0.184	False	0.113	0.071	0.206512	0.836391
45865	eudicotyledons	SPECIATION	Pentapetalae	SPECIATION	0.095	False	0.095	0	-0.25107	0.80176
19328	eudicotyledons	SPECIATION	Pentapetalae	SPECIATION	0.14	True	0.089	0.051	0.0776155	0.938134
19328	eudicotyledons	SPECIATION	Pentapetalae	SPECIATION	0.09	True	0.089	0.001	-0.244625	0.806747
30602	eudicotyledons	SPECIATION	Pentapetalae	SPECIATION	0.103	False	0.064	0.039	0.000277753	0.999778
10139	eudicotyledons	SPECIATION	Pentapetalae	SPECIATION	0.065	False	0.062	0.003	-0.231735	0.816743
11477	eudicotyledons	SPECIATION	Pentapetalae	SPECIATION	0.219	False	0.127	0.092	0.341853	0.732462
11477	eudicotyledons	SPECIATION	Pentapetalae	SPECIATION	0.06	False	0.127	-0.067	-0.682872	0.494688
11477	eudicotyledons	SPECIATION	Pentapetalae	SPECIATION	0.089	False	0.127	-0.038	-0.495973	0.619914
45096	eudicotyledons	SPECIATION	Pentapetalae	SPECIATION	0.07	False	0.076	-0.006	-0.289739	0.772016
22746	eudicotyledons	SPECIATION	Pentapetalae	SPECIATION	0.078	False	0.082	-0.004	-0.276849	0.781896
47074	eudicotyledons	SPECIATION	Pentapetalae	SPECIATION	0.661	True	0.589	0.072	0.212957	0.831361
47074	eudicotyledons	SPECIATION	Pentapetalae	SPECIATION	0.44	True	0.589	-0.149	-1.21135	0.225762
47074	eudicotyledons	SPECIATION	Pentapetalae	SPECIATION	0.796	True	0.589	0.207	1.08301	0.278806
47074	eudicotyledons	SPECIATION	Pentapetalae	SPECIATION	0.027	False	0.589	-0.562	-3.87305	0.00010748
47794	eudicotyledons	SPECIATION	Pentapetalae	SPECIATION	0.168	False	0.097	0.071	0.206512	0.836391
31077	eudicotyledons	SPECIATION	Pentapetalae	SPECIATION	0.061	False	0.088	-0.027	-0.42508	0.670778
10516	eudicotyledons	SPECIATION	Pentapetalae	SPECIATION	0.077	False	0.051	0.026	-0.0835048	0.93345
10516	eudicotyledons	SPECIATION	Pentapetalae	SPECIATION	0.052	False	0.051	0.001	-0.244625	0.806747
10516	eudicotyledons	SPECIATION	Pentapetalae	SPECIATION	0.084	False	0.051	0.033	-0.0383911	0.969376
10516	eudicotyledons	SPECIATION	Pentapetalae	SPECIATION	0.094	False	0.051	0.043	0.026057	0.979212
10516	eudicotyledons	SPECIATION	Pentapetalae	SPECIATION	0.087	True	0.051	0.036	-0.0190567	0.984796
10516	eudicotyledons	SPECIATION	Pentapetalae	SPECIATION	0.087	True	0.051	0.036	-0.0190567	0.984796
10516	eudicotyledons	SPECIATION	Pentapetalae	SPECIATION	0.039	True	0.051	-0.012	-0.328408	0.742603
10516	eudicotyledons	SPECIATION	Pentapetalae	SPECIATION	0.052	False	0.051	0.001	-0.244625	0.806747
34201	eudicotyledons	SPECIATION	Pentapetalae	SPECIATION	0.072	False	0.096	-0.024	-0.405745	0.68493
34201	eudicotyledons	SPECIATION	Pentapetalae	SPECIATION	0.814	True	0.096	0.718	4.37631	1.20708e-05
34201	eudicotyledons	SPECIATION	Pentapetalae	SPECIATION	0.158	True	0.096	0.062	0.148508	0.881942
31062	eudicotyledons	SPECIATION	Pentapetalae	SPECIATION	0.067	False	0.079	-0.012	-0.328408	0.742603
31062	eudicotyledons	SPECIATION	Pentapetalae	SPECIATION	0.111	False	0.079	0.032	-0.0448359	0.964238
31062	eudicotyledons	SPECIATION	Pentapetalae	SPECIATION	0.083	False	0.079	0.004	-0.225291	0.821753
31062	eudicotyledons	SPECIATION	Pentapetalae	SPECIATION	0.028	False	0.079	-0.051	-0.579755	0.56208
31062	eudicotyledons	SPECIATION	Pentapetalae	SPECIATION	0.039	False	0.079	-0.04	-0.508862	0.610849
31062	eudicotyledons	SPECIATION	Pentapetalae	SPECIATION	0.049	False	0.079	-0.03	-0.444414	0.656743
31062	eudicotyledons	SPECIATION	Pentapetalae	SPECIATION	0.167	True	0.079	0.088	0.316074	0.751947
31062	eudicotyledons	SPECIATION	Pentapetalae	SPECIATION	0.182	True	0.079	0.103	0.412746	0.679793
31062	eudicotyledons	SPECIATION	Pentapetalae	SPECIATION	0.06	False	0.079	-0.019	-0.373521	0.70876
31062	eudicotyledons	SPECIATION	Pentapetalae	SPECIATION	0.145	False	0.079	0.066	0.174288	0.861639
31062	eudicotyledons	SPECIATION	Pentapetalae	SPECIATION	0.035	False	0.079	-0.044	-0.534642	0.592898
31062	eudicotyledons	SPECIATION	Pentapetalae	SPECIATION	0.028	False	0.079	-0.051	-0.579755	0.56208
31062	eudicotyledons	SPECIATION	Pentapetalae	SPECIATION	0.033	False	0.079	-0.046	-0.547531	0.584014
31062	eudicotyledons	SPECIATION	Pentapetalae	SPECIATION	0.062	True	0.079	-0.017	-0.360632	0.718375
31062	eudicotyledons	SPECIATION	Pentapetalae	SPECIATION	0.024	True	0.079	-0.055	-0.605535	0.544824
31570	eudicotyledons	SPECIATION	Pentapetalae	SPECIATION	0.064	False	0.083	-0.019	-0.373521	0.70876
11082	eudicotyledons	SPECIATION	Pentapetalae	SPECIATION	0.05	False	0.056	-0.006	-0.289739	0.772016
23142	eudicotyledons	SPECIATION	Pentapetalae	SPECIATION	0.032	False	0.063	-0.031	-0.450859	0.652091
23142	eudicotyledons	SPECIATION	Pentapetalae	SPECIATION	0.039	False	0.063	-0.024	-0.405745	0.68493
12701	eudicotyledons	SPECIATION	Pentapetalae	SPECIATION	0.09	False	0.094	-0.004	-0.276849	0.781896
12701	eudicotyledons	SPECIATION	Pentapetalae	SPECIATION	0.066	False	0.094	-0.028	-0.431525	0.666087
12701	eudicotyledons	SPECIATION	Pentapetalae	SPECIATION	0.114	False	0.094	0.02	-0.122174	0.902761
12701	eudicotyledons	SPECIATION	Pentapetalae	SPECIATION	0.106	True	0.094	0.012	-0.173732	0.862076
12701	eudicotyledons	SPECIATION	Pentapetalae	SPECIATION	0.09	True	0.094	-0.004	-0.276849	0.781896
31544	eudicotyledons	SPECIATION	Pentapetalae	SPECIATION	0.083	False	0.094	-0.011	-0.321963	0.747481
35986	eudicotyledons	SPECIATION	Pentapetalae	SPECIATION	0.168	False	0.247	-0.079	-0.76021	0.447129
45779	eudicotyledons	SPECIATION	Pentapetalae	SPECIATION	0.055	False	0.065	-0.01	-0.315518	0.752368
45779	eudicotyledons	SPECIATION	Pentapetalae	SPECIATION	0.033	False	0.065	-0.032	-0.457304	0.647453
33541	eudicotyledons	SPECIATION	Pentapetalae	SPECIATION	0.094	False	0.118	-0.024	-0.405745	0.68493
33541	eudicotyledons	SPECIATION	Pentapetalae	SPECIATION	0.299	True	0.118	0.181	0.915441	0.35996
33541	eudicotyledons	SPECIATION	Pentapetalae	SPECIATION	0.164	True	0.118	0.046	0.0453914	0.963795
33541	eudicotyledons	SPECIATION	Pentapetalae	SPECIATION	0.187	True	0.118	0.069	0.193622	0.846472
33541	eudicotyledons	SPECIATION	Pentapetalae	SPECIATION	0.129	True	0.118	0.011	-0.180177	0.857014
11089	eudicotyledons	SPECIATION	Pentapetalae	SPECIATION	0.035	False	0.054	-0.019	-0.373521	0.70876
11089	eudicotyledons	SPECIATION	Pentapetalae	SPECIATION	0.052	False	0.054	-0.002	-0.26396	0.791811
28441	eudicotyledons	SPECIATION	Pentapetalae	SPECIATION	0.062	False	0.061	0.001	-0.244625	0.806747
31707	eudicotyledons	SPECIATION	Pentapetalae	SPECIATION	0.054	False	0.117	-0.063	-0.657093	0.511121
31707	eudicotyledons	SPECIATION	Pentapetalae	SPECIATION	0.013	False	0.117	-0.104	-0.92133	0.356878
31707	eudicotyledons	SPECIATION	Pentapetalae	SPECIATION	0.127	False	0.117	0.01	-0.186622	0.851957
31707	eudicotyledons	SPECIATION	Pentapetalae	SPECIATION	0.14	False	0.117	0.023	-0.102839	0.918091
31707	eudicotyledons	SPECIATION	Pentapetalae	SPECIATION	0.055	False	0.117	-0.062	-0.650648	0.515274
31707	eudicotyledons	SPECIATION	Pentapetalae	SPECIATION	0.23	True	0.117	0.113	0.477194	0.633224
31707	eudicotyledons	SPECIATION	Pentapetalae	SPECIATION	0.1	True	0.117	-0.017	-0.360632	0.718375
31707	eudicotyledons	SPECIATION	Pentapetalae	SPECIATION	0.042	False	0.117	-0.075	-0.734431	0.462686
31707	eudicotyledons	SPECIATION	Pentapetalae	SPECIATION	0.078	False	0.117	-0.039	-0.502418	0.615374
31707	eudicotyledons	SPECIATION	Pentapetalae	SPECIATION	0.103	False	0.117	-0.014	-0.341297	0.73288
31707	eudicotyledons	SPECIATION	Pentapetalae	SPECIATION	0.068	False	0.117	-0.049	-0.566866	0.570805
31707	eudicotyledons	SPECIATION	Pentapetalae	SPECIATION	0.22	True	0.117	0.103	0.412746	0.679793
31707	eudicotyledons	SPECIATION	Pentapetalae	SPECIATION	0.179	True	0.117	0.062	0.148508	0.881942
31707	eudicotyledons	SPECIATION	Pentapetalae	SPECIATION	0.099	False	0.117	-0.018	-0.367077	0.713562
31707	eudicotyledons	SPECIATION	Pentapetalae	SPECIATION	0.064	False	0.117	-0.053	-0.592645	0.553419
31707	eudicotyledons	SPECIATION	Pentapetalae	SPECIATION	0.087	False	0.117	-0.03	-0.444414	0.656743
31707	eudicotyledons	SPECIATION	Pentapetalae	SPECIATION	0.136	False	0.117	0.019	-0.128618	0.89766
31707	eudicotyledons	SPECIATION	Pentapetalae	SPECIATION	0.097	False	0.117	-0.02	-0.379966	0.703971
31707	eudicotyledons	SPECIATION	Pentapetalae	SPECIATION	0.037	False	0.117	-0.08	-0.766655	0.443287
31707	eudicotyledons	SPECIATION	Pentapetalae	SPECIATION	0.085	False	0.117	-0.032	-0.457304	0.647453
31707	eudicotyledons	SPECIATION	Pentapetalae	SPECIATION	0.521	True	0.117	0.404	2.35263	0.018641
31707	eudicotyledons	SPECIATION	Pentapetalae	SPECIATION	0.05	True	0.117	-0.067	-0.682872	0.494688
31707	eudicotyledons	SPECIATION	Pentapetalae	SPECIATION	0.312	True	0.117	0.195	1.00567	0.314575
31707	eudicotyledons	SPECIATION	Pentapetalae	SPECIATION	0.103	True	0.117	-0.014	-0.341297	0.73288
15180	eudicotyledons	SPECIATION	Pentapetalae	SPECIATION	0.133	False	0.149	-0.016	-0.354187	0.723199
12749	eudicotyledons	SPECIATION	Pentapetalae	SPECIATION	0.056	False	0.068	-0.012	-0.328408	0.742603
45914	eudicotyledons	SPECIATION	Pentapetalae	SPECIATION	0.037	False	0.142	-0.105	-0.927775	0.353524
45914	eudicotyledons	SPECIATION	Pentapetalae	SPECIATION	0.191	False	0.142	0.049	0.0647259	0.948392
45914	eudicotyledons	SPECIATION	Pentapetalae	SPECIATION	0.068	False	0.142	-0.074	-0.727986	0.466622
45914	eudicotyledons	SPECIATION	Pentapetalae	SPECIATION	0.026	False	0.142	-0.116	-0.998668	0.317956
45914	eudicotyledons	SPECIATION	Pentapetalae	SPECIATION	0.123	True	0.142	-0.019	-0.373521	0.70876
[truncated: 1,046,576+ more rows]
