# Supplementary material for: Unveiling the functional fate of duplicated genes through expression profiling and structural analysis
Source: HighWire-hosted journal article supplement (doi:10.1101/gr.280166.124), 2025-08-14
Supplement: Supplemental_Table_S3.xlsx [file Supplemental_Table_S3.xlsx]

## Sheet: Supplemental_Table_S3
Supplemental Table S3. Number of duplications per major lineage and category. The first column shows the lineage name, the second to the seventh columns represent the duplication categories (normal-normal, short-short, long-long, normal-short, normal-long, short-long), the eighth column indicates the total number of duplications per lineage, and the ninth shows the percentage of duplication from …
Taxa	normal-normal	short-short	long-long	normal-long	short-normal	short-long	total	percentage
Protostomia	28807	132	1314	5337	379	23	35992	3.88
Deuterostomia	112581	436	9640	23825	550	80	147112	15.87
Fungi	10589	33	1572	4686	40	8	16928	1.83
Amoebozoa	5240	36	143	856	66	1	6342	0.68
Excavates	5182	111	107	455	85	0	5940	0.64
Alveolata-Stramenopiles	8385	141	123	526	234	0	9409	1.02
Viridiplantae	540411	1280	18788	69712	2126	196	632513	68.25
Archaea	1727	13	155	298	38	1	2232	0.24
Eubacteria	14366	46	922	3140	160	2	18636	2.01
NEMVE	4388	49	47	393	45	0	4922	0.53
TRIAD	1856	7	33	230	19	0	2145	0.23
MONBE	959	14	35	126	7	0	1141	0.12
Bilateria	5682	4	934	2104	0	0	8724	0.94
Eumetazoa	8246	0	515	1580	26	0	10367	1.12
Metazoa-Choanoflagellida	1006	0	356	299	0	0	1661	0.18
Opisthokonts	1383	0	186	242	0	0	1811	0.2
Unikonts	1188	0	156	418	0	0	1762	0.19
Eukaryota	14205	0	182	1837	2	0	16226	1.75
Bikonts	523	0	92	170	0	0	785	0.08
SAR/HA_supergroup	1099	0	355	602	0	0	2056	0.22
Archaea-Eukaryota	47	0	5	58	0	0	110	0.01
