# Supplementary material for: Unveiling the functional fate of duplicated genes through expression profiling and structural analysis
Source: HighWire-hosted journal article supplement (doi:10.1101/gr.280166.124), 2025-08-14
Supplement: Supplemental_Table_S4.xlsx [file Supplemental_Table_S4.xlsx]

## Sheet: Supplemental_Table_S4
Supplemental Table S4. Relevant comparisons between the distribution of the LDDT values between paralogues and orthologues. Columns in order show: threshold of percentage of identity used (MDO-og1 - LDO-og2), duplication category (symmetric or asymmetric), comparison made, LDDT median value for the first list, LDDT median value for the second list, p value calculated using the Mann–Whitney U test.
pident_diff	category	comparison	median_1	median_2	p_val
5	Symmetric	ldo-og1, mdo-og1	0.8646	0.8515	1.3e-256**
5	Symmetric	ldo-og2, mdo-og2	0.8543	0.847	3.1e-78**
5	Symmetric	ldo-og2, mdo-og1	0.8543	0.8515	1.1e-10**
5	Asymmetric	ldo-og1, mdo-og1	0.7767	0.7095	0.e+0**
5	Asymmetric	ldo-og2, mdo-og2	0.7228	0.6969	2.9e-77**
5	Asymmetric	ldo-og2, mdo-og1	0.7228	0.7095	5.6e-23**
10	Symmetric	ldo-og1, mdo-og1	0.8651	0.8503	0.e+0**
10	Symmetric	ldo-og2, mdo-og2	0.8542	0.8452	4.1e-214**
10	Symmetric	ldo-og2, mdo-og1	0.8542	0.8503	6.9e-36**
10	Asymmetric	ldo-og1, mdo-og1	0.7894	0.7164	0.e+0**
10	Asymmetric	ldo-og2, mdo-og2	0.7399	0.7039	8.1e-275**
10	Asymmetric	ldo-og2, mdo-og1	0.7399	0.7164	4.5e-128**
20	Symmetric	ldo-og1, mdo-og1	0.8677	0.8506	0.e+0**
20	Symmetric	ldo-og2, mdo-og2	0.8557	0.8441	0.e+0**
20	Symmetric	ldo-og2, mdo-og1	0.8557	0.8506	2.e-100**
20	Asymmetric	ldo-og1, mdo-og1	0.8102	0.723	0.e+0**
20	Asymmetric	ldo-og2, mdo-og2	0.7662	0.7117	0.e+0**
20	Asymmetric	ldo-og2, mdo-og1	0.7662	0.723	0.e+0**
30	Symmetric	ldo-og1, mdo-og1	0.869	0.8506	0.e+0**
30	Symmetric	ldo-og2, mdo-og2	0.8562	0.8429	0.e+0**
30	Symmetric	ldo-og2, mdo-og1	0.8562	0.8506	1.2e-145**
30	Asymmetric	ldo-og1, mdo-og1	0.8218	0.7217	0.e+0**
30	Asymmetric	ldo-og2, mdo-og2	0.7827	0.7128	0.e+0**
30	Asymmetric	ldo-og2, mdo-og1	0.7827	0.7217	0.e+0**
40	Symmetric	ldo-og1, mdo-og1	0.8699	0.8508	0.e+0**
40	Symmetric	ldo-og2, mdo-og2	0.8567	0.8423	0.e+0**
40	Symmetric	ldo-og2, mdo-og1	0.8567	0.8508	2.e-175**
40	Asymmetric	ldo-og1, mdo-og1	0.8291	0.7202	0.e+0**
40	Asymmetric	ldo-og2, mdo-og2	0.7911	0.7124	0.e+0**
40	Asymmetric	ldo-og2, mdo-og1	0.7911	0.7202	0.e+0**
50	Symmetric	ldo-og1, mdo-og1	0.8703	0.8508	0.e+0**
50	Symmetric	ldo-og2, mdo-og2	0.8569	0.8421	0.e+0**
50	Symmetric	ldo-og2, mdo-og1	0.8569	0.8508	1.9e-189**
50	Asymmetric	ldo-og1, mdo-og1	0.832	0.7194	0.e+0**
50	Asymmetric	ldo-og2, mdo-og2	0.795	0.7117	0.e+0**
50	Asymmetric	ldo-og2, mdo-og1	0.795	0.7194	0.e+0**
