# Supplementary material for: Unveiling the functional fate of duplicated genes through expression profiling and structural analysis
Source: HighWire-hosted journal article supplement (doi:10.1101/gr.280166.124), 2025-08-14
Supplement: Supplemental_Table_S5.xlsx [file Supplemental_Table_S5.xlsx]

## Sheet: Supplemental_Table_S5
Supplemental Table S5. Number of RNA-seq experiments used per anatomical entity in plants and animals. The first column shows the mnemonic, the second, the SRA code, and the following column is the anatomical entity name.
mnemonic	SRA	anatomical_entity
BOVIN	SRX2081420	uterus
BOVIN	SRX477501	uterus
BOVIN	SRX477502	uterus
BOVIN	SRX477503	uterus
BOVIN	SRX477504	uterus
BOVIN	SRX477505	uterus
BOVIN	SRX477506	uterus
BOVIN	SRX477507	uterus
BOVIN	SRX477508	uterus
BOVIN	SRX196344	brain
BOVIN	SRX196353	brain
BOVIN	SRX196362	brain
BOVIN	SRX1584571	pituitary gland
BOVIN	SRX1584572	pituitary gland
BOVIN	SRX1584573	pituitary gland
BOVIN	SRX1584574	pituitary gland
BOVIN	SRX1584575	pituitary gland
BOVIN	SRX1584576	pituitary gland
BOVIN	SRX1584577	pituitary gland
BOVIN	SRX1584578	pituitary gland
BOVIN	SRX1584583	pituitary gland
BOVIN	SRX1584594	pituitary gland
BOVIN	SRX1584605	pituitary gland
BOVIN	SRX1584616	pituitary gland
BOVIN	SRX1584627	pituitary gland
BOVIN	SRX1584638	pituitary gland
BOVIN	SRX1584647	pituitary gland
BOVIN	SRX1584648	pituitary gland
BOVIN	SRX626748	pituitary gland
BOVIN	SRX626749	pituitary gland
BOVIN	SRX626750	pituitary gland
BOVIN	SRX626751	pituitary gland
BOVIN	SRX626753	pituitary gland
BOVIN	SRX626752	pituitary gland
BOVIN	SRX626754	pituitary gland
BOVIN	SRX625446	pituitary gland
BOVIN	SRX477486	pituitary gland
BOVIN	SRX477487	pituitary gland
BOVIN	SRX477488	pituitary gland
BOVIN	SRX477489	pituitary gland
BOVIN	SRX477490	pituitary gland
BOVIN	SRX477491	pituitary gland
BOVIN	SRX477492	pituitary gland
BOVIN	ERX480074	kidney
BOVIN	SRX562380	blood
BOVIN	SRX242927	blood
BOVIN	SRX1529960	blood
BOVIN	SRX1529961	blood
BOVIN	SRX1529962	blood
BOVIN	SRX1529963	blood
BOVIN	SRX1529964	blood
BOVIN	SRX1529965	blood
BOVIN	SRX1529966	blood
BOVIN	SRX1529967	blood
BOVIN	SRX1529976	blood
BOVIN	SRX1529977	blood
BOVIN	SRX1529978	blood
BOVIN	SRX1529979	blood
BOVIN	SRX1529980	blood
BOVIN	SRX1529981	blood
BOVIN	SRX1529982	blood
BOVIN	SRX1529983	blood
BOVIN	SRX1529992	blood
BOVIN	SRX1529993	blood
BOVIN	SRX1529994	blood
BOVIN	SRX1529995	blood
BOVIN	SRX1529996	blood
BOVIN	SRX1529997	blood
BOVIN	SRX1529998	blood
BOVIN	SRX1529999	blood
BOVIN	SRX1529968	blood
BOVIN	SRX1529969	blood
BOVIN	SRX1529970	blood
BOVIN	SRX1529971	blood
BOVIN	SRX1529972	blood
BOVIN	SRX1529973	blood
BOVIN	SRX1529974	blood
BOVIN	SRX1529975	blood
BOVIN	SRX1529984	blood
BOVIN	SRX1529985	blood
BOVIN	SRX1529986	blood
BOVIN	SRX1529987	blood
BOVIN	SRX1529988	blood
BOVIN	SRX1529989	blood
BOVIN	SRX1529990	blood
BOVIN	SRX1529991	blood
BOVIN	SRX1530000	blood
BOVIN	SRX1530001	blood
BOVIN	SRX1530002	blood
BOVIN	SRX1530003	blood
BOVIN	SRX1530004	blood
BOVIN	SRX1530005	blood
BOVIN	SRX1530006	blood
BOVIN	SRX1530007	blood
BOVIN	SRX747953	testis
BOVIN	SRX358238	testis
BOVIN	SRX357347	testis
BOVIN	SRX357348	testis
BOVIN	SRX357349	testis
BOVIN	SRX357350	testis
BOVIN	SRX357345	testis
BOVIN	SRX357346	testis
BOVIN	SRX2081416	testis
BOVIN	SRX1757675	testis
BOVIN	SRX196352	testis
BOVIN	SRX196361	testis
BOVIN	SRX196370	testis
BOVIN	SRX1761351	testis
BOVIN	SRX1759154	testis
BOVIN	SRX388838	testis
BOVIN	SRX1177191	heart
BOVIN	SRX1177227	heart
BOVIN	SRX562369	heart
BOVIN	SRX1538119	heart
BOVIN	SRX1538120	heart
BOVIN	SRX1538121	heart
BOVIN	SRX196346	heart
BOVIN	SRX196355	heart
BOVIN	SRX196364	heart
BOVIN	SRX562375	ovary
BOVIN	SRX477493	ovary
BOVIN	SRX477494	ovary
BOVIN	SRX477495	ovary
BOVIN	SRX477496	ovary
BOVIN	SRX477497	ovary
BOVIN	SRX477498	ovary
BOVIN	SRX477499	ovary
BOVIN	SRX477500	ovary
BOVIN	SRX1302580	ovary
BOVIN	SRX1177230	esophagus
BOVIN	SRX747732	esophagus
BOVIN	SRX1177213	buccal salivary gland
BOVIN	SRX747717	buccal salivary gland
BOVIN	SRX1177192	liver
BOVIN	SRX1177231	liver
BOVIN	SRX144207	liver
BOVIN	SRX144208	liver
BOVIN	SRX144209	liver
BOVIN	SRX144210	liver
BOVIN	SRX144211	liver
BOVIN	SRX144212	liver
BOVIN	SRX144213	liver
BOVIN	SRX144214	liver
BOVIN	SRX144215	liver
BOVIN	SRX144216	liver
BOVIN	SRX144217	liver
BOVIN	SRX747758	liver
BOVIN	SRX211579	liver
BOVIN	SRX211580	liver
BOVIN	SRX815582	liver
BOVIN	SRX815591	liver
BOVIN	SRX1584597	liver
BOVIN	SRX1584598	liver
BOVIN	SRX1584599	liver
BOVIN	SRX1584600	liver
BOVIN	SRX1584601	liver
BOVIN	SRX1584602	liver
BOVIN	SRX1584603	liver
BOVIN	SRX1584604	liver
BOVIN	SRX1584606	liver
BOVIN	SRX1584607	liver
BOVIN	SRX1584608	liver
BOVIN	SRX1584609	liver
BOVIN	SRX1584610	liver
BOVIN	SRX1584611	liver
BOVIN	SRX1584612	liver
BOVIN	SRX1584613	liver
BOVIN	SRX562296	liver
BOVIN	SRX1538122	liver
BOVIN	SRX1538123	liver
BOVIN	SRX1538124	liver
BOVIN	SRX2422991	liver
BOVIN	SRX2422992	liver
BOVIN	SRX2422993	liver
BOVIN	SRX2422994	liver
BOVIN	SRX2423001	liver
BOVIN	SRX2423002	liver
BOVIN	SRX2423003	liver
BOVIN	SRX2423004	liver
BOVIN	SRX2423007	liver
BOVIN	SRX2423008	liver
BOVIN	SRX2423011	liver
BOVIN	SRX2423012	liver
BOVIN	SRX2423019	liver
BOVIN	SRX2423020	liver
BOVIN	SRX2423021	liver
BOVIN	SRX2423022	liver
BOVIN	SRX2423027	liver
BOVIN	SRX2423028	liver
BOVIN	SRX2422995	liver
BOVIN	SRX2422996	liver
BOVIN	SRX2422997	liver
BOVIN	SRX2422998	liver
BOVIN	SRX2422999	liver
BOVIN	SRX2423000	liver
BOVIN	SRX2423005	liver
BOVIN	SRX2423006	liver
BOVIN	SRX2423009	liver
BOVIN	SRX2423010	liver
BOVIN	SRX2423013	liver
BOVIN	SRX2423014	liver
BOVIN	SRX2423015	liver
BOVIN	SRX2423016	liver
BOVIN	SRX2423017	liver
BOVIN	SRX2423018	liver
BOVIN	SRX2423023	liver
BOVIN	SRX2423024	liver
BOVIN	SRX2423025	liver
BOVIN	SRX2423026	liver
BOVIN	SRX1445303	liver
BOVIN	SRX1473894	liver
BOVIN	SRX1473895	liver
BOVIN	SRX1473896	liver
BOVIN	SRX1473897	liver
BOVIN	SRX1473898	liver
BOVIN	SRX1473899	liver
BOVIN	SRX1473900	liver
BOVIN	SRX1473901	liver
BOVIN	SRX1473902	liver
BOVIN	SRX1473903	liver
BOVIN	ERX1403310	liver
BOVIN	ERX1403311	liver
BOVIN	ERX1403312	liver
BOVIN	ERX1403338	liver
BOVIN	SRX728601	liver
BOVIN	SRX728602	liver
BOVIN	SRX728603	liver
BOVIN	SRX728604	liver
BOVIN	SRX728605	liver
BOVIN	SRX728606	liver
BOVIN	SRX728607	liver
BOVIN	SRX728608	liver
BOVIN	SRX728609	liver
BOVIN	SRX728610	liver
BOVIN	SRX728611	liver
BOVIN	SRX728612	liver
BOVIN	SRX728613	liver
BOVIN	SRX728614	liver
BOVIN	SRX728615	liver
BOVIN	SRX728616	liver
BOVIN	SRX728617	liver
BOVIN	SRX728618	liver
BOVIN	SRX728619	liver
BOVIN	SRX728620	liver
BOVIN	SRX728621	liver
BOVIN	SRX728622	liver
BOVIN	SRX728623	liver
BOVIN	SRX728624	liver
BOVIN	SRX728625	liver
BOVIN	SRX728626	liver
BOVIN	SRX728627	liver
BOVIN	SRX728628	liver
BOVIN	SRX728629	liver
BOVIN	SRX728630	liver
BOVIN	SRX728631	liver
BOVIN	SRX728632	liver
BOVIN	SRX728633	liver
BOVIN	SRX728634	liver
BOVIN	SRX728635	liver
BOVIN	SRX728636	liver
BOVIN	SRX728637	liver
BOVIN	SRX728638	liver
BOVIN	SRX728639	liver
BOVIN	SRX728640	liver
BOVIN	SRX728641	liver
BOVIN	SRX728642	liver
BOVIN	SRX728643	liver
BOVIN	SRX728644	liver
BOVIN	SRX728645	liver
BOVIN	SRX728646	liver
BOVIN	SRX728647	liver
BOVIN	SRX728648	liver
BOVIN	SRX477531	liver
BOVIN	SRX477532	liver
BOVIN	SRX477533	liver
BOVIN	SRX477534	liver
BOVIN	SRX477535	liver
BOVIN	SRX477536	liver
BOVIN	SRX477537	liver
BOVIN	SRX477538	liver
BOVIN	SRX196348	liver
BOVIN	SRX196357	liver
BOVIN	SRX196366	liver
BOVIN	SRX1445120	liver
BOVIN	SRX1445127	liver
BOVIN	SRX1445129	liver
BOVIN	SRX1445130	liver
BOVIN	SRX1445131	liver
BOVIN	SRX1445132	liver
BOVIN	SRX1445138	liver
BOVIN	SRX1445139	liver
BOVIN	SRX1445141	liver
BOVIN	SRX1445142	liver
BOVIN	SRX1445143	liver
BOVIN	SRX1445144	liver
BOVIN	SRX1445145	liver
BOVIN	SRX1445146	liver
BOVIN	SRX1445147	liver
BOVIN	SRX2992350	liver
BOVIN	SRX2992351	liver
BOVIN	SRX2992353	liver
BOVIN	SRX2992354	liver
BOVIN	SRX2992355	liver
BOVIN	SRX2992356	liver
BOVIN	SRX2992357	liver
BOVIN	SRX2992358	liver
BOVIN	SRX2992359	liver
BOVIN	SRX2992360	liver
BOVIN	SRX2992361	liver
BOVIN	SRX2992362	liver
BOVIN	SRX2992363	liver
BOVIN	SRX2992364	liver
BOVIN	SRX2992365	liver
BOVIN	SRX2992367	liver
BOVIN	SRX2992368	liver
BOVIN	SRX2992378	liver
BOVIN	SRX2992381	liver
BOVIN	SRX2992382	liver
BOVIN	SRX2992383	liver
BOVIN	SRX2992384	liver
BOVIN	SRX2992386	liver
BOVIN	SRX2992387	liver
BOVIN	SRX2992388	liver
BOVIN	SRX2992404	liver
BOVIN	SRX2992405	liver
BOVIN	SRX2992406	liver
BOVIN	SRX2992407	liver
BOVIN	SRX2992408	liver
BOVIN	SRX2992409	liver
BOVIN	SRX2992410	liver
BOVIN	SRX2992411	liver
BOVIN	SRX2992412	liver
BOVIN	SRX2992413	liver
BOVIN	SRX2992425	liver
BOVIN	SRX2992430	liver
BOVIN	SRX2982275	liver
BOVIN	SRX2982277	liver
BOVIN	SRX2982279	liver
BOVIN	SRX2982281	liver
BOVIN	SRX2982283	liver
BOVIN	SRX2982285	liver
BOVIN	SRX2982287	liver
BOVIN	SRX2982289	liver
BOVIN	SRX2982291	liver
BOVIN	SRX2982293	liver
BOVIN	SRX2982296	liver
BOVIN	SRX2982298	liver
BOVIN	SRX2982300	liver
BOVIN	SRX2982302	liver
BOVIN	SRX2982304	liver
BOVIN	SRX2982305	liver
BOVIN	SRX2982307	liver
BOVIN	SRX2982309	liver
BOVIN	SRX2982311	liver
BOVIN	SRX2982313	liver
BOVIN	ERX480069	liver
BOVIN	SRX747897	thyroid gland
BOVIN	SRX562378	thyroid gland
BOVIN	SRX1177223	adrenal gland
BOVIN	SRX747745	adrenal gland
BOVIN	SRX562366	adrenal gland
BOVIN	SRX1177248	bladder organ
BOVIN	SRX747813	bladder organ
BOVIN	SRX1177275	tongue
BOVIN	SRX747999	tongue
BOVIN	SRX562379	tongue
BOVIN	SRX477478	hypothalamus
BOVIN	SRX477479	hypothalamus
BOVIN	SRX477480	hypothalamus
BOVIN	SRX477481	hypothalamus
BOVIN	SRX477482	hypothalamus
BOVIN	SRX477483	hypothalamus
BOVIN	SRX477484	hypothalamus
BOVIN	SRX477485	hypothalamus
BOVIN	ERX480068	hypothalamus
BOVIN	SRX381025	placenta
BOVIN	SRX1629203	placenta
BOVIN	SRX1177216	cerebellum
BOVIN	SRX747766	cerebellum
BOVIN	SRX562368	cerebellum
BOVIN	SRX1177226	lung
BOVIN	SRX1254108	lung
BOVIN	SRX1254113	lung
BOVIN	SRX1254118	lung
BOVIN	SRX1254123	lung
BOVIN	SRX562371	lung
BOVIN	SRX2506196	lung
BOVIN	SRX2506198	lung
BOVIN	SRX2506200	lung
BOVIN	SRX2433648	lung
BOVIN	SRX196349	lung
BOVIN	SRX196358	lung
BOVIN	SRX196367	lung
BOVIN	ERX480073	lung
BOVIN	SRX1177200	spleen
BOVIN	SRX1177264	spleen
BOVIN	SRX747893	spleen
BOVIN	SRX562376	spleen
BOVIN	SRX2506270	spleen
BOVIN	SRX2506271	spleen
BOVIN	SRX2506272	spleen
BOVIN	SRX196351	spleen
BOVIN	SRX196360	spleen
BOVIN	SRX196369	spleen
BOVIN	SRX748006	prostate gland
BOVIN	SRX562377	thymus
BOVIN	SRX1177272	bone marrow
BOVIN	SRX747894	bone marrow
CHICK	SRX196371	brain
CHICK	SRX196380	brain
CHICK	SRX217701	brain
CHICK	SRX081869	brain
CHICK	SRX081870	brain
CHICK	SRX191155	brain
CHICK	SRX196374	kidney
CHICK	SRX196383	kidney
CHICK	SRX196392	kidney
CHICK	SRX2506321	kidney
CHICK	SRX2506322	kidney
CHICK	SRX2506323	kidney
CHICK	SRX2506330	kidney
CHICK	SRX2506331	kidney
CHICK	SRX2506332	kidney
CHICK	SRX081875	kidney
CHICK	SRX081876	kidney
CHICK	SRX191157	kidney
CHICK	SRX196379	testis
CHICK	SRX196388	testis
CHICK	SRX196397	testis
CHICK	SRX217703	testis
CHICK	SRX081879	testis
CHICK	SRX081880	testis
CHICK	SRX196373	heart
CHICK	SRX196382	heart
CHICK	SRX196391	heart
CHICK	SRX2506220	heart
CHICK	SRX2506223	heart
CHICK	SRX2506226	heart
CHICK	SRX2506253	heart
CHICK	SRX2506256	heart
CHICK	SRX2506259	heart
CHICK	SRX081873	heart
CHICK	SRX081874	heart
CHICK	SRX191158	heart
CHICK	SRX217702	ovary
CHICK	SRX328086	ovary
CHICK	SRX196375	liver
CHICK	SRX196384	liver
CHICK	SRX2506291	liver
CHICK	SRX2506293	liver
CHICK	SRX2506295	liver
CHICK	SRX2506315	liver
CHICK	SRX2506317	liver
CHICK	SRX2506319	liver
CHICK	SRX081877	liver
CHICK	SRX081878	liver
CHICK	SRX191156	liver
CHICK	SRX081871	cerebellum
CHICK	SRX081872	cerebellum
CHICK	SRX196376	lung
CHICK	SRX196385	lung
CHICK	SRX196394	lung
CHICK	SRX2506221	lung
CHICK	SRX2506224	lung
CHICK	SRX2506227	lung
CHICK	SRX2506254	lung
CHICK	SRX2506257	lung
CHICK	SRX2506260	lung
CHICK	SRX196378	spleen
CHICK	SRX196387	spleen
CHICK	SRX196396	spleen
CHICK	SRX2506292	spleen
CHICK	SRX2506294	spleen
CHICK	SRX2506296	spleen
CHICK	SRX2506316	spleen
CHICK	SRX2506318	spleen
CHICK	SRX2506320	spleen
DROME	SRX4084634	brain
DROME	SRX4084635	brain
DROME	SRX4084636	brain
DROME	SRX4084637	brain
DROME	SRX122590	brain
DROME	SRX122591	brain
DROME	SRX122592	brain
DROME	SRX122593	brain
DROME	SRX122594	brain
DROME	SRX122595	brain
DROME	SRX122596	brain
DROME	SRX122597	brain
DROME	SRX122598	brain
DROME	SRX122599	brain
DROME	SRX122600	brain
DROME	SRX122601	brain
DROME	SRX493950	testis
DROME	SRX493999	testis
DROME	SRX1720957	testis
DROME	SRX1720958	testis
DROME	SRX109278	testis
DROME	SRX109279	testis
DROME	SRX493957	ovary
DROME	SRX494031	ovary
DROME	SRX494041	ovary
DROME	SRX494116	ovary
DROME	SRX109275	ovary
DROME	SRX109276	ovary
DROME	SRX109277	ovary
DROME	SRX109311	ovary
DROME	SRX494036	buccal salivary gland
DROME	SRX494065	buccal salivary gland
DROME	SRX493955	buccal salivary gland
DROME	SRX493985	buccal salivary gland
DROME	SRX109295	buccal salivary gland
DROME	SRX109296	buccal salivary gland
DROME	SRX109301	buccal salivary gland
DROME	SRX109302	buccal salivary gland
DROME	SRX494096	malpighian tubule
DROME	SRX494017	malpighian tubule
FELCA	SRX1610311	uterus
FELCA	SRX569925	brain
FELCA	SRX569484	brain
FELCA	SRX999198	testis
FELCA	SRX999203	testis
FELCA	SRX999205	testis
FELCA	SRX998633	testis
FELCA	SRX999190	testis
FELCA	SRX999192	testis
FELCA	SRX999211	testis
FELCA	SRX999212	testis
FELCA	SRX999213	testis
FELCA	SRX211594	liver
FELCA	SRX211595	liver
FELCA	SRX211596	liver
FELCA	ERX1403298	liver
FELCA	ERX1403299	liver
FELCA	SRX1625944	spleen
FELCA	SRX1625946	spleen
GORGO	SRX081954	testis
GORGO	SRX217686	testis
GORGO	SRX081948	heart
GORGO	SRX081949	heart
GORGO	SRX081952	liver
GORGO	SRX081953	liver
GORGO	SRX081946	cerebellum
GORGO	SRX081947	cerebellum
HORSE	SRX1847935	blood
HORSE	SRX1847913	blood
HORSE	SRX1847934	blood
HORSE	SRX1847936	blood
HORSE	SRX1847937	blood
HORSE	SRX1847901	blood
HORSE	SRX1847903	blood
HORSE	SRX1847904	blood
HORSE	SRX1847909	blood
HORSE	SRX1847911	blood
HORSE	SRX1847914	blood
HORSE	SRX1847916	blood
HORSE	SRX1847921	blood
HORSE	SRX1847923	blood
HORSE	SRX1847925	blood
HORSE	SRX1847928	blood
HORSE	SRX1847930	blood
HORSE	SRX1847931	blood
HORSE	SRX1847933	blood
HORSE	SRX1847902	blood
HORSE	SRX1847905	blood
HORSE	SRX1847906	blood
HORSE	SRX1847907	blood
HORSE	SRX1847908	blood
HORSE	SRX1847910	blood
HORSE	SRX1847912	blood
HORSE	SRX1847915	blood
HORSE	SRX1847917	blood
HORSE	SRX1847918	blood
HORSE	SRX1847919	blood
HORSE	SRX1847920	blood
HORSE	SRX1847922	blood
HORSE	SRX1847924	blood
HORSE	SRX1847926	blood
HORSE	SRX1847927	blood
HORSE	SRX1847929	blood
HORSE	SRX1847932	blood
HORSE	SRX147028	blood
HORSE	SRX147029	blood
HORSE	SRX147034	blood
HORSE	SRX147035	blood
HORSE	SRX147024	blood
HORSE	SRX147025	blood
HORSE	SRX147026	blood
HORSE	SRX147027	blood
HORSE	SRX147030	blood
HORSE	SRX147031	blood
HORSE	SRX147032	blood
HORSE	SRX147033	blood
HORSE	SRX277445	testis
HORSE	SRX3022257	testis
HORSE	SRX3022258	testis
HORSE	SRX3022259	testis
HORSE	SRX3022260	testis
HORSE	SRX3022262	testis
HORSE	SRX3022263	testis
HORSE	SRX273056	testis
HORSE	SRX1101151	testis
HORSE	SRX211589	liver
HORSE	SRX211590	liver
HORSE	SRX211591	liver
HORSE	SRX277446	cerebellum
HORSE	SRX273057	cerebellum
HORSE	SRX2033089	cerebellum
HORSE	SRX2033090	cerebellum
HORSE	SRX2033097	cerebellum
HORSE	SRX2033095	cerebellum
HORSE	SRX2033098	cerebellum
HORSE	SRX752839	bone marrow
HORSE	SRX752840	bone marrow
HORSE	SRX752841	bone marrow
HORSE	SRX752842	bone marrow
HORSE	SRX752843	bone marrow
HUMAN	ERX288542	pancreas
HUMAN	ERX288592	pancreas
HUMAN	ERX288604	pancreas
HUMAN	ERX288633	pancreas
HUMAN	SRX4794900	pancreas
HUMAN	SRX4794909	pancreas
HUMAN	SRX4794916	pancreas
HUMAN	SRX4794926	pancreas
HUMAN	SRX4794940	pancreas
HUMAN	SRX4794953	pancreas
HUMAN	SRX4794962	pancreas
HUMAN	SRX4794982	pancreas
HUMAN	ERX011186	brain
HUMAN	ERX011200	brain
HUMAN	SRX328074	brain
HUMAN	SRX328092	brain
HUMAN	SRX328093	brain
HUMAN	SRX080219	brain
HUMAN	SRX080222	brain
HUMAN	SRX080223	brain
HUMAN	SRX4794864	brain
HUMAN	SRX4794865	brain
HUMAN	SRX4794866	brain
HUMAN	SRX4794867	brain
HUMAN	SRX4794868	brain
HUMAN	SRX4794869	brain
HUMAN	SRX4794935	brain
HUMAN	SRX4794946	brain
HUMAN	SRX4794980	brain
HUMAN	SRX223286	pituitary gland
HUMAN	SRX579162	pituitary gland
HUMAN	SRX616895	pituitary gland
HUMAN	SRX409156	pituitary gland
HUMAN	SRX573804	pituitary gland
HUMAN	SRX635924	pituitary gland
HUMAN	SRX259901	pituitary gland
HUMAN	SRX260562	pituitary gland
HUMAN	SRX421865	pituitary gland
HUMAN	SRX575566	pituitary gland
HUMAN	SRX629516	pituitary gland
HUMAN	SRX409411	pituitary gland
HUMAN	SRX571686	pituitary gland
HUMAN	SRX581148	pituitary gland
HUMAN	SRX589885	pituitary gland
HUMAN	SRX622290	pituitary gland
HUMAN	SRX261231	pituitary gland
HUMAN	SRX419017	pituitary gland
HUMAN	SRX565812	pituitary gland
HUMAN	SRX568590	pituitary gland
HUMAN	SRX592793	pituitary gland
HUMAN	SRX601049	pituitary gland
HUMAN	SRX603731	pituitary gland
HUMAN	SRX617419	pituitary gland
HUMAN	SRX618901	pituitary gland
HUMAN	SRX633217	pituitary gland
HUMAN	SRX633225	pituitary gland
HUMAN	SRX636455	pituitary gland
HUMAN	SRX640643	pituitary gland
HUMAN	SRX640828	pituitary gland
HUMAN	SRX262028	pituitary gland
HUMAN	SRX409284	pituitary gland
HUMAN	SRX564614	pituitary gland
HUMAN	SRX572198	pituitary gland
HUMAN	SRX583350	pituitary gland
HUMAN	SRX585257	pituitary gland
HUMAN	SRX592805	pituitary gland
HUMAN	SRX259972	pituitary gland
HUMAN	SRX261222	pituitary gland
HUMAN	SRX558997	pituitary gland
HUMAN	SRX559159	pituitary gland
HUMAN	SRX565636	pituitary gland
HUMAN	SRX565982	pituitary gland
HUMAN	SRX566768	pituitary gland
HUMAN	SRX573608	pituitary gland
HUMAN	SRX577778	pituitary gland
HUMAN	SRX579100	pituitary gland
HUMAN	SRX581170	pituitary gland
HUMAN	SRX583472	pituitary gland
HUMAN	SRX598975	pituitary gland
HUMAN	SRX601692	pituitary gland
HUMAN	SRX601813	pituitary gland
HUMAN	SRX605293	pituitary gland
HUMAN	SRX614112	pituitary gland
HUMAN	SRX617827	pituitary gland
HUMAN	SRX618940	pituitary gland
HUMAN	SRX623489	pituitary gland
HUMAN	SRX623894	pituitary gland
HUMAN	SRX628012	pituitary gland
HUMAN	SRX630716	pituitary gland
HUMAN	SRX631755	pituitary gland
HUMAN	SRX633107	pituitary gland
HUMAN	SRX563660	pituitary gland
HUMAN	SRX565347	pituitary gland
HUMAN	SRX577419	pituitary gland
HUMAN	SRX613110	pituitary gland
HUMAN	SRX815503	intestine
HUMAN	SRX815504	intestine
HUMAN	SRX815505	intestine
HUMAN	SRX815506	intestine
HUMAN	SRX815507	intestine
HUMAN	SRX815508	intestine
HUMAN	SRX815509	intestine
HUMAN	SRX1715773	intestine
HUMAN	SRX1715774	intestine
HUMAN	SRX1715775	intestine
HUMAN	SRX815510	kidney
HUMAN	SRX815511	kidney
HUMAN	SRX815512	kidney
HUMAN	SRX080220	kidney
HUMAN	SRX1715767	kidney
HUMAN	SRX1715768	kidney
HUMAN	SRX1715769	kidney
HUMAN	SRX4794848	kidney
HUMAN	SRX4794849	kidney
HUMAN	SRX4794850	kidney
HUMAN	SRX4794851	kidney
HUMAN	SRX4794852	kidney
HUMAN	SRX4794937	kidney
HUMAN	SRX4794960	kidney
HUMAN	SRX199093	blood
HUMAN	SRX199671	blood
HUMAN	SRX203706	blood
HUMAN	SRX221673	blood
HUMAN	SRX222304	blood
HUMAN	SRX222570	blood
HUMAN	SRX223310	blood
HUMAN	SRX223416	blood
HUMAN	SRX260287	blood
HUMAN	SRX579571	blood
HUMAN	SRX583762	blood
HUMAN	SRX589746	blood
HUMAN	SRX630396	blood
HUMAN	SRX630597	blood
HUMAN	SRX634800	blood
HUMAN	SRX198165	blood
HUMAN	SRX199187	blood
HUMAN	SRX199561	blood
HUMAN	SRX221948	blood
HUMAN	SRX222576	blood
HUMAN	SRX259996	blood
HUMAN	SRX405715	blood
HUMAN	SRX412778	blood
HUMAN	SRX562864	blood
HUMAN	SRX570767	blood
HUMAN	SRX598346	blood
HUMAN	SRX603164	blood
HUMAN	SRX618266	blood
HUMAN	SRX632188	blood
HUMAN	SRX634198	blood
HUMAN	SRX223368	blood
HUMAN	SRX563125	blood
HUMAN	SRX602437	blood
HUMAN	SRX624232	blood
HUMAN	SRX199181	blood
HUMAN	SRX221373	blood
HUMAN	SRX221951	blood
HUMAN	SRX222353	blood
HUMAN	SRX222463	blood
HUMAN	SRX223101	blood
HUMAN	SRX260441	blood
HUMAN	SRX561395	blood
HUMAN	SRX562502	blood
HUMAN	SRX562746	blood
HUMAN	SRX568607	blood
HUMAN	SRX573723	blood
HUMAN	SRX579293	blood
HUMAN	SRX581954	blood
HUMAN	SRX592004	blood
HUMAN	SRX607634	blood
HUMAN	SRX615177	blood
HUMAN	SRX615636	blood
HUMAN	SRX618827	blood
HUMAN	SRX631319	blood
HUMAN	SRX198227	blood
HUMAN	SRX198329	blood
HUMAN	SRX199426	blood
HUMAN	SRX203930	blood
HUMAN	SRX203947	blood
HUMAN	SRX221309	blood
HUMAN	SRX221611	blood
HUMAN	SRX222181	blood
HUMAN	SRX222185	blood
HUMAN	SRX222375	blood
HUMAN	SRX259860	blood
HUMAN	SRX260354	blood
HUMAN	SRX261266	blood
HUMAN	SRX408679	blood
HUMAN	SRX412203	blood
HUMAN	SRX560178	blood
HUMAN	SRX560649	blood
HUMAN	SRX569334	blood
HUMAN	SRX577036	blood
HUMAN	SRX578131	blood
HUMAN	SRX578512	blood
HUMAN	SRX583405	blood
HUMAN	SRX589871	blood
HUMAN	SRX601342	blood
HUMAN	SRX605192	blood
HUMAN	SRX629923	blood
HUMAN	SRX632563	blood
HUMAN	SRX634575	blood
HUMAN	SRX637242	blood
HUMAN	SRX199154	blood
HUMAN	SRX199630	blood
HUMAN	SRX199681	blood
HUMAN	SRX203771	blood
HUMAN	SRX221328	blood
HUMAN	SRX222312	blood
HUMAN	SRX222592	blood
HUMAN	SRX222664	blood
HUMAN	SRX223116	blood
HUMAN	SRX223199	blood
HUMAN	SRX260026	blood
HUMAN	SRX260741	blood
HUMAN	SRX260858	blood
HUMAN	SRX261348	blood
HUMAN	SRX261518	blood
HUMAN	SRX404826	blood
HUMAN	SRX408842	blood
HUMAN	SRX410952	blood
HUMAN	SRX568480	blood
HUMAN	SRX571093	blood
HUMAN	SRX575875	blood
HUMAN	SRX594188	blood
HUMAN	SRX596423	blood
HUMAN	SRX604919	blood
HUMAN	SRX605641	blood
HUMAN	SRX606008	blood
HUMAN	SRX615540	blood
HUMAN	SRX617266	blood
HUMAN	SRX624157	blood
HUMAN	SRX625212	blood
HUMAN	SRX628591	blood
HUMAN	SRX629592	blood
HUMAN	SRX640054	blood
HUMAN	SRX203738	blood
HUMAN	SRX203968	blood
HUMAN	SRX222364	blood
HUMAN	SRX222589	blood
HUMAN	SRX222900	blood
HUMAN	SRX260583	blood
HUMAN	SRX260865	blood
HUMAN	SRX410281	blood
HUMAN	SRX421955	blood
HUMAN	SRX422087	blood
HUMAN	SRX568325	blood
HUMAN	SRX569801	blood
HUMAN	SRX571560	blood
HUMAN	SRX574639	blood
HUMAN	SRX581870	blood
HUMAN	SRX592514	blood
HUMAN	SRX596035	blood
HUMAN	SRX597473	blood
HUMAN	SRX599021	blood
HUMAN	SRX599490	blood
HUMAN	SRX601926	blood
HUMAN	SRX619911	blood
HUMAN	SRX633423	blood
HUMAN	SRX633714	blood
HUMAN	SRX635959	blood
HUMAN	SRX637904	blood
HUMAN	SRX637992	blood
HUMAN	SRX199550	blood
HUMAN	SRX199698	blood
HUMAN	SRX199801	blood
HUMAN	SRX203653	blood
HUMAN	SRX203829	blood
HUMAN	SRX203837	blood
HUMAN	SRX203864	blood
HUMAN	SRX203868	blood
HUMAN	SRX203878	blood
HUMAN	SRX221260	blood
HUMAN	SRX222238	blood
HUMAN	SRX222343	blood
HUMAN	SRX222659	blood
HUMAN	SRX222804	blood
HUMAN	SRX222807	blood
HUMAN	SRX222956	blood
HUMAN	SRX223068	blood
HUMAN	SRX223168	blood
HUMAN	SRX223170	blood
HUMAN	SRX223528	blood
HUMAN	SRX260453	blood
HUMAN	SRX260540	blood
HUMAN	SRX260681	blood
HUMAN	SRX260719	blood
HUMAN	SRX260946	blood
HUMAN	SRX261157	blood
HUMAN	SRX261218	blood
HUMAN	SRX261291	blood
HUMAN	SRX261597	blood
HUMAN	SRX406606	blood
HUMAN	SRX409183	blood
HUMAN	SRX414334	blood
HUMAN	SRX415197	blood
HUMAN	SRX416257	blood
HUMAN	SRX420692	blood
HUMAN	SRX420740	blood
HUMAN	SRX558462	blood
HUMAN	SRX563135	blood
HUMAN	SRX563301	blood
HUMAN	SRX567505	blood
HUMAN	SRX567810	blood
HUMAN	SRX569139	blood
HUMAN	SRX569145	blood
HUMAN	SRX571306	blood
HUMAN	SRX571675	blood
HUMAN	SRX571939	blood
HUMAN	SRX574527	blood
HUMAN	SRX576195	blood
HUMAN	SRX576332	blood
HUMAN	SRX576936	blood
HUMAN	SRX580057	blood
HUMAN	SRX580913	blood
HUMAN	SRX584147	blood
HUMAN	SRX589294	blood
HUMAN	SRX590661	blood
HUMAN	SRX591402	blood
HUMAN	SRX594563	blood
HUMAN	SRX595118	blood
HUMAN	SRX599698	blood
HUMAN	SRX601453	blood
HUMAN	SRX613404	blood
HUMAN	SRX613859	blood
HUMAN	SRX614598	blood
HUMAN	SRX615727	blood
HUMAN	SRX616859	blood
HUMAN	SRX617708	blood
HUMAN	SRX621839	blood
HUMAN	SRX622548	blood
HUMAN	SRX624701	blood
HUMAN	SRX624810	blood
HUMAN	SRX632118	blood
HUMAN	SRX632676	blood
HUMAN	SRX634698	blood
HUMAN	SRX636467	blood
HUMAN	SRX638180	blood
HUMAN	SRX198155	blood
HUMAN	SRX199019	blood
HUMAN	SRX204007	blood
HUMAN	SRX221626	blood
HUMAN	SRX260131	blood
HUMAN	SRX260151	blood
HUMAN	SRX406779	blood
HUMAN	SRX411315	blood
HUMAN	SRX416818	blood
HUMAN	SRX421800	blood
HUMAN	SRX558905	blood
HUMAN	SRX560883	blood
HUMAN	SRX561811	blood
HUMAN	SRX562409	blood
HUMAN	SRX562513	blood
HUMAN	SRX567271	blood
HUMAN	SRX571639	blood
HUMAN	SRX576232	blood
HUMAN	SRX578975	blood
HUMAN	SRX579108	blood
HUMAN	SRX589155	blood
HUMAN	SRX599184	blood
HUMAN	SRX607548	blood
HUMAN	SRX617179	blood
HUMAN	SRX619028	blood
HUMAN	SRX619633	blood
HUMAN	SRX624161	blood
HUMAN	SRX629188	blood
HUMAN	SRX633080	blood
HUMAN	SRX633374	blood
HUMAN	SRX637588	blood
HUMAN	SRX199066	blood
HUMAN	SRX199084	blood
HUMAN	SRX199356	blood
HUMAN	SRX199664	blood
HUMAN	SRX199736	blood
HUMAN	SRX203421	blood
HUMAN	SRX203588	blood
HUMAN	SRX203932	blood
HUMAN	SRX222258	blood
HUMAN	SRX222322	blood
HUMAN	SRX222768	blood
HUMAN	SRX223529	blood
HUMAN	SRX260107	blood
HUMAN	SRX260684	blood
HUMAN	SRX261338	blood
HUMAN	SRX261897	blood
HUMAN	SRX406301	blood
HUMAN	SRX412849	blood
HUMAN	SRX415972	blood
HUMAN	SRX559423	blood
HUMAN	SRX560023	blood
HUMAN	SRX562208	blood
HUMAN	SRX565866	blood
HUMAN	SRX567073	blood
HUMAN	SRX569230	blood
HUMAN	SRX572043	blood
HUMAN	SRX575901	blood
HUMAN	SRX575945	blood
HUMAN	SRX577271	blood
HUMAN	SRX577403	blood
HUMAN	SRX580450	blood
HUMAN	SRX581197	blood
HUMAN	SRX583509	blood
HUMAN	SRX585362	blood
HUMAN	SRX588404	blood
HUMAN	SRX590971	blood
HUMAN	SRX591953	blood
HUMAN	SRX596389	blood
HUMAN	SRX598823	blood
HUMAN	SRX602535	blood
HUMAN	SRX603752	blood
HUMAN	SRX604563	blood
HUMAN	SRX606898	blood
HUMAN	SRX607695	blood
HUMAN	SRX607819	blood
HUMAN	SRX613119	blood
HUMAN	SRX614778	blood
HUMAN	SRX615188	blood
HUMAN	SRX616978	blood
HUMAN	SRX617012	blood
HUMAN	SRX617734	blood
HUMAN	SRX618626	blood
HUMAN	SRX619382	blood
HUMAN	SRX624133	blood
HUMAN	SRX624148	blood
HUMAN	SRX625132	blood
HUMAN	SRX628234	blood
HUMAN	SRX629412	blood
HUMAN	SRX632729	blood
HUMAN	SRX636549	blood
HUMAN	SRX636772	blood
HUMAN	SRX640739	blood
HUMAN	SRX640812	blood
HUMAN	SRX410067	blood
HUMAN	SRX414257	blood
HUMAN	SRX562139	blood
HUMAN	SRX566966	blood
HUMAN	SRX601718	blood
HUMAN	SRX632122	blood
HUMAN	SRX399459	blood
HUMAN	SRX399460	blood
HUMAN	SRX399461	blood
HUMAN	SRX399471	blood
HUMAN	SRX399472	blood
HUMAN	SRX399473	blood
HUMAN	SRX399482	blood
HUMAN	SRX399483	blood
HUMAN	SRX399484	blood
HUMAN	SRX399494	blood
HUMAN	SRX399495	blood
HUMAN	SRX399496	blood
HUMAN	SRX399456	blood
HUMAN	SRX399457	blood
HUMAN	SRX399458	blood
HUMAN	SRX399468	blood
HUMAN	SRX399469	blood
HUMAN	SRX399470	blood
HUMAN	SRX399479	blood
HUMAN	SRX399480	blood
HUMAN	SRX399481	blood
HUMAN	SRX399491	blood
HUMAN	SRX399492	blood
HUMAN	SRX399493	blood
HUMAN	SRX399462	blood
HUMAN	SRX399463	blood
HUMAN	SRX399464	blood
HUMAN	SRX399465	blood
HUMAN	SRX399466	blood
HUMAN	SRX399467	blood
HUMAN	SRX399474	blood
HUMAN	SRX399475	blood
HUMAN	SRX399476	blood
HUMAN	SRX399477	blood
HUMAN	SRX399478	blood
HUMAN	SRX399485	blood
HUMAN	SRX399486	blood
HUMAN	SRX399487	blood
HUMAN	SRX399488	blood
HUMAN	SRX399489	blood
HUMAN	SRX399490	blood
HUMAN	SRX399497	blood
HUMAN	SRX399498	blood
HUMAN	SRX399499	blood
HUMAN	SRX399500	blood
HUMAN	SRX399501	blood
HUMAN	SRX399502	blood
HUMAN	SRX2633955	blood
HUMAN	SRX2633956	blood
HUMAN	SRX2633957	blood
HUMAN	SRX2633958	blood
HUMAN	SRX2633959	blood
HUMAN	SRX2633960	blood
HUMAN	SRX2633961	blood
HUMAN	SRX2633962	blood
HUMAN	SRX2633963	blood
HUMAN	SRX2633964	blood
HUMAN	SRX2633965	blood
HUMAN	SRX2633966	blood
HUMAN	SRX2633967	blood
HUMAN	SRX2633968	blood
HUMAN	SRX2633969	blood
HUMAN	SRX2633970	blood
HUMAN	SRX2633971	blood
HUMAN	SRX2633972	blood
HUMAN	SRX2633973	blood
HUMAN	SRX2633974	blood
HUMAN	SRX2633975	blood
HUMAN	SRX2633976	blood
HUMAN	SRX2633977	blood
HUMAN	SRX3503722	blood
HUMAN	SRX3503723	blood
HUMAN	SRX3503724	blood
HUMAN	SRX3503725	blood
HUMAN	SRX3503726	blood
HUMAN	SRX3503727	blood
HUMAN	SRX3503728	blood
HUMAN	SRX3503729	blood
HUMAN	SRX3529283	blood
HUMAN	SRX3529314	blood
HUMAN	SRX3529276	blood
HUMAN	SRX3529303	blood
HUMAN	SRX3529307	blood
HUMAN	SRX3529309	blood
HUMAN	SRX3529310	blood
HUMAN	SRX3529317	blood
HUMAN	SRX3529266	blood
HUMAN	SRX3529268	blood
HUMAN	SRX3529269	blood
HUMAN	SRX3529273	blood
HUMAN	SRX3529290	blood
HUMAN	SRX3529291	blood
HUMAN	SRX3529299	blood
HUMAN	SRX3529301	blood
HUMAN	SRX3529328	blood
HUMAN	SRX3529271	blood
HUMAN	SRX3529272	blood
HUMAN	SRX3529277	blood
HUMAN	SRX3529278	blood
HUMAN	SRX3529284	blood
HUMAN	SRX3529293	blood
HUMAN	SRX3529298	blood
HUMAN	SRX3529300	blood
HUMAN	SRX3529306	blood
HUMAN	SRX3529308	blood
HUMAN	SRX3529316	blood
HUMAN	SRX3529320	blood
HUMAN	SRX3529321	blood
HUMAN	SRX3529327	blood
HUMAN	SRX3529282	blood
HUMAN	SRX3529311	blood
HUMAN	SRX3529315	blood
HUMAN	SRX3529326	blood
HUMAN	SRX3529264	blood
HUMAN	SRX3529265	blood
HUMAN	SRX3529267	blood
HUMAN	SRX3529274	blood
HUMAN	SRX3529275	blood
HUMAN	SRX3529280	blood
HUMAN	SRX3529285	blood
HUMAN	SRX3529289	blood
HUMAN	SRX3529295	blood
HUMAN	SRX3529296	blood
HUMAN	SRX3529302	blood
HUMAN	SRX3529313	blood
HUMAN	SRX3529324	blood
HUMAN	SRX3529325	blood
HUMAN	SRX3529270	blood
HUMAN	SRX3529279	blood
HUMAN	SRX3529286	blood
HUMAN	SRX3529288	blood
HUMAN	SRX3529292	blood
HUMAN	SRX3529294	blood
HUMAN	SRX3529297	blood
HUMAN	SRX3529305	blood
HUMAN	SRX3529318	blood
HUMAN	SRX3529319	blood
HUMAN	SRX3529323	blood
HUMAN	SRX3529287	blood
HUMAN	SRX3529304	blood
HUMAN	SRX3529281	blood
HUMAN	SRX3529312	blood
HUMAN	SRX3529322	blood
HUMAN	SRX4794988	blood
HUMAN	SRX4794989	blood
HUMAN	SRX4794990	blood
HUMAN	SRX4794991	blood
HUMAN	SRX4794992	blood
HUMAN	SRX4794993	blood
HUMAN	ERX288501	testis
HUMAN	ERX288512	testis
HUMAN	ERX288544	testis
HUMAN	ERX288563	testis
HUMAN	ERX288568	testis
HUMAN	ERX288608	testis
HUMAN	ERX288610	testis
HUMAN	ERX288638	testis
HUMAN	SRX081998	testis
HUMAN	SRX081999	testis
HUMAN	ERX011202	testis
HUMAN	ERX011203	testis
HUMAN	SRX217682	testis
HUMAN	SRX080228	testis
HUMAN	SRX1038912	testis
HUMAN	SRX1038911	testis
HUMAN	ERX288494	stomach
HUMAN	ERX288516	stomach
HUMAN	ERX288572	stomach
HUMAN	ERX288605	stomach
HUMAN	SRX815519	stomach
HUMAN	SRX815520	stomach
HUMAN	SRX815521	stomach
HUMAN	SRX815522	stomach
HUMAN	SRX815523	stomach
HUMAN	SRX815524	stomach
HUMAN	SRX815525	stomach
HUMAN	SRX1020485	stomach
HUMAN	SRX1020499	stomach
HUMAN	SRX1020502	stomach
HUMAN	SRX1020501	stomach
HUMAN	SRX1020500	stomach
HUMAN	SRX1020498	stomach
HUMAN	SRX4794888	stomach
HUMAN	SRX4794889	stomach
HUMAN	SRX4794890	stomach
HUMAN	SRX4794891	stomach
HUMAN	SRX4794892	stomach
HUMAN	SRX4794893	stomach
HUMAN	SRX4794898	stomach
HUMAN	SRX4794907	stomach
HUMAN	SRX4794914	stomach
HUMAN	SRX4794936	stomach
HUMAN	SRX4794958	stomach
HUMAN	SRX4794965	stomach
HUMAN	SRX4794971	stomach
HUMAN	SRX4794977	stomach
HUMAN	SRX4794981	stomach
HUMAN	ERX288526	heart
HUMAN	ERX288536	heart
HUMAN	ERX288549	heart
HUMAN	ERX288573	heart
HUMAN	ERX288574	heart
HUMAN	ERX288578	heart
HUMAN	ERX288579	heart
HUMAN	ERX288585	heart
HUMAN	ERX288601	heart
HUMAN	SRX081991	heart
HUMAN	SRX081990	heart
HUMAN	SRX081992	heart
HUMAN	ERX011183	heart
HUMAN	ERX011197	heart
HUMAN	SRX815496	heart
HUMAN	SRX815497	heart
HUMAN	SRX815498	heart
HUMAN	SRX815499	heart
HUMAN	SRX815500	heart
HUMAN	SRX815501	heart
HUMAN	SRX815502	heart
HUMAN	SRX1020487	heart
HUMAN	SRX1020486	heart
HUMAN	SRX1038907	heart
HUMAN	SRX1038908	heart
HUMAN	ERX288488	ovary
HUMAN	ERX288493	ovary
HUMAN	ERX288538	ovary
HUMAN	ERX288624	ovary
HUMAN	ERX537312	ovary
HUMAN	ERX011184	ovary
HUMAN	ERX011196	ovary
HUMAN	SRX217684	ovary
HUMAN	SRX328076	ovary
HUMAN	SRX4794877	ovary
HUMAN	SRX4794878	ovary
HUMAN	SRX4794944	ovary
HUMAN	SRX4794970	ovary
HUMAN	ERX288477	esophagus
HUMAN	ERX288486	esophagus
HUMAN	ERX288503	esophagus
HUMAN	ERX288510	esophagus
HUMAN	ERX288521	esophagus
HUMAN	ERX288566	esophagus
HUMAN	SRX583233	esophagus
HUMAN	SRX407817	esophagus
HUMAN	SRX4794882	esophagus
HUMAN	SRX4794883	esophagus
HUMAN	SRX4794884	esophagus
HUMAN	SRX4794885	esophagus
HUMAN	SRX4794886	esophagus
HUMAN	SRX4794887	esophagus
HUMAN	SRX4794941	esophagus
HUMAN	SRX4794948	esophagus
HUMAN	SRX4795005	esophagus
HUMAN	SRX4795006	esophagus
HUMAN	SRX4795007	esophagus
HUMAN	ERX288492	buccal salivary gland
HUMAN	ERX288495	buccal salivary gland
HUMAN	ERX288504	buccal salivary gland
HUMAN	ERX288534	buccal salivary gland
HUMAN	ERX288599	buccal salivary gland
HUMAN	ERX288606	buccal salivary gland
HUMAN	ERX016338	liver
HUMAN	ERX016354	liver
HUMAN	ERX016362	liver
HUMAN	ERX288481	liver
HUMAN	ERX288509	liver
HUMAN	ERX288554	liver
HUMAN	ERX288580	liver
HUMAN	ERX288588	liver
HUMAN	ERX1403313	liver
HUMAN	ERX1403333	liver
HUMAN	SRX081997	liver
HUMAN	SRX081996	liver
HUMAN	ERX011211	liver
HUMAN	ERX011229	liver
HUMAN	SRX014818	liver
HUMAN	SRX014819	liver
HUMAN	SRX014820	liver
HUMAN	SRX014821	liver
HUMAN	SRX014822	liver
HUMAN	SRX014823	liver
HUMAN	SRX014824	liver
HUMAN	SRX014825	liver
HUMAN	SRX014826	liver
HUMAN	SRX014827	liver
HUMAN	SRX014828	liver
HUMAN	SRX014829	liver
HUMAN	SRX080221	liver
HUMAN	SRX1020495	liver
HUMAN	SRX1020493	liver
HUMAN	SRX1038909	liver
HUMAN	SRX1038910	liver
HUMAN	SRX1458822	liver
HUMAN	SRX1458823	liver
HUMAN	SRX1458824	liver
HUMAN	SRX1715764	liver
HUMAN	SRX1715765	liver
HUMAN	SRX1715766	liver
HUMAN	SRX4794858	liver
HUMAN	SRX4794859	liver
HUMAN	SRX4794860	liver
HUMAN	SRX4794861	liver
HUMAN	SRX4794862	liver
HUMAN	SRX4794863	liver
HUMAN	SRX4794931	liver
HUMAN	SRX4794961	liver
HUMAN	SRX4795008	liver
HUMAN	SRX4795009	liver
HUMAN	SRX4795010	liver
HUMAN	ERX288515	thyroid gland
HUMAN	ERX288556	thyroid gland
HUMAN	ERX288570	thyroid gland
HUMAN	ERX288582	thyroid gland
HUMAN	ERX288602	thyroid gland
HUMAN	ERX288613	thyroid gland
HUMAN	ERX288621	thyroid gland
HUMAN	ERX288627	thyroid gland
HUMAN	ERX288634	thyroid gland
HUMAN	ERX011194	thyroid gland
HUMAN	ERX011213	thyroid gland
HUMAN	SRX199108	thyroid gland
HUMAN	SRX222533	thyroid gland
HUMAN	SRX605094	thyroid gland
HUMAN	SRX576863	thyroid gland
HUMAN	SRX596015	thyroid gland
HUMAN	SRX605752	thyroid gland
HUMAN	SRX407017	thyroid gland
HUMAN	SRX577606	thyroid gland
HUMAN	SRX617167	thyroid gland
HUMAN	SRX619322	thyroid gland
HUMAN	SRX199483	thyroid gland
HUMAN	SRX221407	thyroid gland
HUMAN	SRX222720	thyroid gland
HUMAN	SRX407488	thyroid gland
HUMAN	SRX559198	thyroid gland
HUMAN	SRX594429	thyroid gland
HUMAN	SRX598811	thyroid gland
HUMAN	SRX203566	thyroid gland
HUMAN	SRX221576	thyroid gland
HUMAN	SRX415425	thyroid gland
HUMAN	SRX416834	thyroid gland
HUMAN	SRX420633	thyroid gland
HUMAN	SRX604580	thyroid gland
HUMAN	SRX624388	thyroid gland
HUMAN	SRX203754	thyroid gland
HUMAN	SRX203875	thyroid gland
HUMAN	SRX221539	thyroid gland
HUMAN	SRX222293	thyroid gland
HUMAN	SRX223043	thyroid gland
HUMAN	SRX259885	thyroid gland
HUMAN	SRX261552	thyroid gland
HUMAN	SRX261742	thyroid gland
HUMAN	SRX261966	thyroid gland
HUMAN	SRX415488	thyroid gland
HUMAN	SRX563972	thyroid gland
HUMAN	SRX564057	thyroid gland
HUMAN	SRX578995	thyroid gland
HUMAN	SRX589853	thyroid gland
HUMAN	SRX594942	thyroid gland
HUMAN	SRX605489	thyroid gland
HUMAN	SRX605637	thyroid gland
HUMAN	SRX606896	thyroid gland
HUMAN	SRX607930	thyroid gland
HUMAN	SRX621871	thyroid gland
HUMAN	SRX625108	thyroid gland
HUMAN	SRX629275	thyroid gland
HUMAN	SRX634501	thyroid gland
HUMAN	SRX640104	thyroid gland
HUMAN	SRX221390	thyroid gland
HUMAN	SRX584212	thyroid gland
HUMAN	SRX199265	thyroid gland
HUMAN	SRX199576	thyroid gland
HUMAN	SRX203936	thyroid gland
HUMAN	SRX221550	thyroid gland
HUMAN	SRX223447	thyroid gland
HUMAN	SRX407742	thyroid gland
HUMAN	SRX572640	thyroid gland
HUMAN	SRX601331	thyroid gland
HUMAN	SRX628518	thyroid gland
HUMAN	SRX630799	thyroid gland
HUMAN	SRX221359	thyroid gland
HUMAN	SRX638272	thyroid gland
HUMAN	SRX4794899	thyroid gland
HUMAN	SRX4794908	thyroid gland
HUMAN	SRX4794915	thyroid gland
HUMAN	SRX4794925	thyroid gland
HUMAN	SRX4794938	thyroid gland
HUMAN	SRX4794951	thyroid gland
HUMAN	ERX288498	adrenal gland
HUMAN	ERX288529	adrenal gland
HUMAN	ERX288533	adrenal gland
HUMAN	ERX288547	adrenal gland
HUMAN	ERX288583	adrenal gland
HUMAN	ERX288631	adrenal gland
HUMAN	ERX011198	adrenal gland
HUMAN	ERX011217	adrenal gland
HUMAN	SRX4794904	adrenal gland
HUMAN	SRX4794912	adrenal gland
HUMAN	SRX4794921	adrenal gland
HUMAN	SRX4794939	adrenal gland
HUMAN	SRX4794952	adrenal gland
HUMAN	SRX4794986	adrenal gland
HUMAN	ERX288528	bladder organ
HUMAN	ERX288557	bladder organ
HUMAN	ERX288567	bladder organ
HUMAN	ERX288584	bladder organ
HUMAN	ERX288617	bladder organ
HUMAN	ERX288630	bladder organ
HUMAN	SRX411352	bladder organ
HUMAN	SRX416648	bladder organ
HUMAN	SRX417526	bladder organ
HUMAN	SRX406187	bladder organ
HUMAN	SRX410364	bladder organ
HUMAN	SRX419522	bladder organ
HUMAN	SRX4794918	bladder organ
HUMAN	SRX4794922	bladder organ
HUMAN	SRX4794927	bladder organ
HUMAN	SRX4794928	bladder organ
HUMAN	SRX4794959	bladder organ
HUMAN	SRX199835	amygdala
HUMAN	SRX198992	amygdala
HUMAN	SRX198145	amygdala
HUMAN	SRX262027	amygdala
HUMAN	SRX571989	amygdala
HUMAN	SRX221477	amygdala
HUMAN	SRX583637	amygdala
HUMAN	SRX606264	amygdala
HUMAN	SRX631715	amygdala
HUMAN	SRX221233	amygdala
HUMAN	SRX221643	amygdala
HUMAN	SRX221647	amygdala
HUMAN	SRX261496	amygdala
HUMAN	SRX580004	amygdala
HUMAN	SRX589867	amygdala
HUMAN	SRX595633	amygdala
HUMAN	SRX603058	amygdala
HUMAN	SRX613454	amygdala
HUMAN	SRX619397	amygdala
HUMAN	SRX620184	amygdala
HUMAN	SRX628882	amygdala
HUMAN	SRX631494	amygdala
HUMAN	SRX637056	amygdala
HUMAN	SRX637596	amygdala
HUMAN	SRX198221	amygdala
HUMAN	SRX199498	amygdala
HUMAN	SRX199573	amygdala
HUMAN	SRX222756	amygdala
HUMAN	SRX562145	amygdala
HUMAN	SRX640192	amygdala
HUMAN	SRX198280	amygdala
HUMAN	SRX199500	amygdala
HUMAN	SRX222326	amygdala
HUMAN	SRX563674	amygdala
HUMAN	SRX565796	amygdala
HUMAN	SRX577670	amygdala
HUMAN	SRX578721	amygdala
HUMAN	SRX598636	amygdala
HUMAN	SRX607874	amygdala
HUMAN	SRX617951	amygdala
HUMAN	SRX624997	amygdala
HUMAN	SRX640928	amygdala
HUMAN	SRX641005	amygdala
HUMAN	SRX605701	amygdala
HUMAN	SRX637857	amygdala
HUMAN	SRX613840	hypothalamus
HUMAN	SRX198338	hypothalamus
HUMAN	SRX199600	hypothalamus
HUMAN	SRX406595	hypothalamus
HUMAN	SRX578743	hypothalamus
HUMAN	SRX600213	hypothalamus
HUMAN	SRX637372	hypothalamus
HUMAN	SRX575711	hypothalamus
HUMAN	SRX629636	hypothalamus
HUMAN	SRX632553	hypothalamus
HUMAN	SRX203736	hypothalamus
HUMAN	SRX221421	hypothalamus
HUMAN	SRX222886	hypothalamus
HUMAN	SRX223094	hypothalamus
HUMAN	SRX261834	hypothalamus
HUMAN	SRX412031	hypothalamus
HUMAN	SRX561375	hypothalamus
HUMAN	SRX561762	hypothalamus
HUMAN	SRX561773	hypothalamus
HUMAN	SRX562050	hypothalamus
HUMAN	SRX563334	hypothalamus
HUMAN	SRX576543	hypothalamus
HUMAN	SRX597609	hypothalamus
HUMAN	SRX606232	hypothalamus
HUMAN	SRX617139	hypothalamus
HUMAN	SRX617727	hypothalamus
HUMAN	SRX630759	hypothalamus
HUMAN	SRX199168	hypothalamus
HUMAN	SRX199614	hypothalamus
HUMAN	SRX199788	hypothalamus
HUMAN	SRX222408	hypothalamus
HUMAN	SRX261472	hypothalamus
HUMAN	SRX559976	hypothalamus
HUMAN	SRX567056	hypothalamus
HUMAN	SRX613209	hypothalamus
HUMAN	SRX203950	hypothalamus
HUMAN	SRX405977	hypothalamus
HUMAN	SRX558810	hypothalamus
HUMAN	SRX562948	hypothalamus
HUMAN	SRX563109	hypothalamus
HUMAN	SRX565421	hypothalamus
HUMAN	SRX575300	hypothalamus
HUMAN	SRX594994	hypothalamus
HUMAN	SRX597456	hypothalamus
HUMAN	SRX613895	hypothalamus
HUMAN	SRX614785	hypothalamus
HUMAN	SRX618352	hypothalamus
HUMAN	SRX619328	hypothalamus
HUMAN	SRX628082	hypothalamus
HUMAN	SRX629463	hypothalamus
HUMAN	SRX636552	hypothalamus
HUMAN	SRX637275	hypothalamus
HUMAN	SRX638191	hypothalamus
HUMAN	SRX561297	hypothalamus
HUMAN	SRX612993	hypothalamus
HUMAN	ERX288518	placenta
HUMAN	ERX288539	placenta
HUMAN	ERX288541	placenta
HUMAN	ERX288564	placenta
HUMAN	ERX288569	placenta
HUMAN	ERX288611	placenta
HUMAN	ERX288612	placenta
HUMAN	SRX217683	placenta
HUMAN	SRX328075	placenta
HUMAN	SRX328094	placenta
HUMAN	SRX081989	cerebellum
HUMAN	SRX081988	cerebellum
HUMAN	SRX025578	cerebellum
HUMAN	ERX288491	lung
HUMAN	ERX288496	lung
HUMAN	ERX288531	lung
HUMAN	ERX288596	lung
HUMAN	ERX288597	lung
HUMAN	ERX288615	lung
HUMAN	ERX288620	lung
HUMAN	ERX288640	lung
HUMAN	ERX011222	lung
HUMAN	ERX011227	lung
HUMAN	SRX815513	lung
HUMAN	SRX815514	lung
HUMAN	SRX815515	lung
HUMAN	SRX815516	lung
HUMAN	SRX815517	lung
HUMAN	SRX815518	lung
HUMAN	SRX1020489	lung
HUMAN	SRX1020488	lung
HUMAN	SRX4794870	lung
HUMAN	SRX4794871	lung
HUMAN	SRX4794872	lung
HUMAN	SRX4794873	lung
HUMAN	SRX4794874	lung
HUMAN	SRX4794906	lung
HUMAN	SRX4794942	lung
HUMAN	ERX288522	spleen
HUMAN	ERX288543	spleen
HUMAN	ERX288586	spleen
HUMAN	ERX288616	spleen
HUMAN	ERX288641	spleen
HUMAN	SRX414004	spleen
HUMAN	SRX416668	spleen
HUMAN	SRX576182	spleen
HUMAN	SRX413981	spleen
HUMAN	SRX417714	spleen
HUMAN	SRX558541	spleen
HUMAN	SRX435031	spleen
HUMAN	SRX637176	spleen
HUMAN	SRX419000	spleen
HUMAN	SRX559179	spleen
HUMAN	SRX562830	spleen
HUMAN	SRX564577	spleen
HUMAN	SRX598525	spleen
HUMAN	SRX600469	spleen
HUMAN	SRX640547	spleen
HUMAN	SRX409945	spleen
HUMAN	SRX416022	spleen
HUMAN	SRX588875	spleen
HUMAN	SRX589881	spleen
HUMAN	SRX595968	spleen
HUMAN	SRX615817	spleen
HUMAN	SRX629147	spleen
HUMAN	SRX634294	spleen
HUMAN	SRX634496	spleen
HUMAN	SRX407654	spleen
HUMAN	SRX408000	spleen
HUMAN	SRX412511	spleen
HUMAN	SRX413962	spleen
HUMAN	SRX573527	spleen
HUMAN	SRX576979	spleen
HUMAN	SRX600425	spleen
HUMAN	SRX603229	spleen
HUMAN	SRX606410	spleen
HUMAN	SRX607442	spleen
HUMAN	SRX566391	spleen
HUMAN	SRX598364	spleen
HUMAN	SRX599993	spleen
HUMAN	SRX605574	spleen
HUMAN	SRX605743	spleen
HUMAN	SRX615434	spleen
HUMAN	SRX617064	spleen
HUMAN	SRX618540	spleen
HUMAN	SRX623998	spleen
HUMAN	SRX629609	spleen
HUMAN	SRX404964	spleen
HUMAN	SRX405011	spleen
HUMAN	SRX410750	spleen
HUMAN	SRX419587	spleen
HUMAN	SRX424151	spleen
HUMAN	SRX565721	spleen
HUMAN	SRX566940	spleen
HUMAN	SRX569587	spleen
HUMAN	SRX577216	spleen
HUMAN	SRX577635	spleen
HUMAN	SRX583945	spleen
HUMAN	SRX585307	spleen
HUMAN	SRX588013	spleen
HUMAN	SRX600420	spleen
HUMAN	SRX601629	spleen
HUMAN	SRX602358	spleen
HUMAN	SRX606669	spleen
HUMAN	SRX618271	spleen
HUMAN	SRX620037	spleen
HUMAN	SRX622581	spleen
HUMAN	SRX628372	spleen
HUMAN	SRX633035	spleen
HUMAN	SRX418619	spleen
HUMAN	SRX558117	spleen
HUMAN	SRX558825	spleen
HUMAN	SRX570397	spleen
HUMAN	SRX574657	spleen
HUMAN	SRX575359	spleen
HUMAN	SRX617483	spleen
HUMAN	SRX628907	spleen
HUMAN	SRX640964	spleen
HUMAN	SRX406563	spleen
HUMAN	SRX407097	spleen
HUMAN	SRX410332	spleen
HUMAN	SRX413006	spleen
HUMAN	SRX564471	spleen
HUMAN	SRX569722	spleen
HUMAN	SRX589768	spleen
HUMAN	SRX614367	spleen
HUMAN	ERX288513	prostate gland
HUMAN	ERX288524	prostate gland
HUMAN	ERX288546	prostate gland
HUMAN	ERX288577	prostate gland
HUMAN	ERX288595	prostate gland
HUMAN	ERX288635	prostate gland
HUMAN	ERX288637	prostate gland
HUMAN	ERX011205	prostate gland
HUMAN	ERX011214	prostate gland
HUMAN	SRX406881	prostate gland
HUMAN	SRX410610	prostate gland
HUMAN	SRX416541	prostate gland
HUMAN	SRX559187	prostate gland
HUMAN	SRX600540	prostate gland
HUMAN	SRX605083	prostate gland
HUMAN	SRX613739	prostate gland
HUMAN	SRX623819	prostate gland
HUMAN	SRX632813	prostate gland
HUMAN	SRX636523	prostate gland
HUMAN	SRX413940	prostate gland
HUMAN	SRX416363	prostate gland
HUMAN	SRX564685	prostate gland
HUMAN	SRX576524	prostate gland
HUMAN	SRX589010	prostate gland
HUMAN	SRX591981	prostate gland
HUMAN	SRX599223	prostate gland
HUMAN	SRX628087	prostate gland
HUMAN	SRX631269	prostate gland
HUMAN	SRX640437	prostate gland
HUMAN	SRX261250	prostate gland
HUMAN	SRX404918	prostate gland
HUMAN	SRX407595	prostate gland
HUMAN	SRX409775	prostate gland
HUMAN	SRX412344	prostate gland
HUMAN	SRX413720	prostate gland
HUMAN	SRX416763	prostate gland
HUMAN	SRX420215	prostate gland
HUMAN	SRX420570	prostate gland
HUMAN	SRX570282	prostate gland
HUMAN	SRX591387	prostate gland
HUMAN	SRX618148	prostate gland
HUMAN	SRX630179	prostate gland
HUMAN	SRX405066	prostate gland
HUMAN	SRX408183	prostate gland
HUMAN	SRX413758	prostate gland
HUMAN	SRX417005	prostate gland
HUMAN	SRX557814	prostate gland
HUMAN	SRX562110	prostate gland
HUMAN	SRX572245	prostate gland
HUMAN	SRX572403	prostate gland
HUMAN	SRX576043	prostate gland
HUMAN	SRX583583	prostate gland
HUMAN	SRX599051	prostate gland
HUMAN	SRX599351	prostate gland
HUMAN	SRX599719	prostate gland
HUMAN	SRX613816	prostate gland
HUMAN	SRX623355	prostate gland
HUMAN	SRX637779	prostate gland
HUMAN	SRX221427	prostate gland
HUMAN	SRX260694	prostate gland
HUMAN	SRX407956	prostate gland
HUMAN	SRX416777	prostate gland
HUMAN	SRX561061	prostate gland
HUMAN	SRX565690	prostate gland
HUMAN	SRX577897	prostate gland
HUMAN	SRX582798	prostate gland
HUMAN	SRX594167	prostate gland
HUMAN	SRX616179	prostate gland
HUMAN	SRX616180	prostate gland
HUMAN	SRX617938	prostate gland
HUMAN	SRX622539	prostate gland
HUMAN	SRX628141	prostate gland
HUMAN	SRX633698	prostate gland
HUMAN	SRX637434	prostate gland
HUMAN	SRX595438	prostate gland
HUMAN	SRX4794879	prostate gland
HUMAN	SRX4794880	prostate gland
HUMAN	SRX4794881	prostate gland
HUMAN	SRX4794974	prostate gland
HUMAN	SRX4794978	prostate gland
HUMAN	SRX4794987	prostate gland
HUMAN	ERX288484	bone marrow
HUMAN	ERX288517	bone marrow
HUMAN	ERX288530	bone marrow
HUMAN	ERX288540	bone marrow
HUMAN	ERX288551	bone marrow
HUMAN	ERX288576	bone marrow
HUMAN	ERX288600	bone marrow
HUMAN	ERX288609	bone marrow
HUMAN	ERX537302	fallopian
HUMAN	ERX537304	fallopian
HUMAN	ERX537305	fallopian
HUMAN	ERX537317	fallopian
HUMAN	ERX537326	fallopian
LEPOC	SRX543528	brain
LEPOC	SRX661015	brain
LEPOC	SRX661022	intestine
LEPOC	SRX543514	testis
LEPOC	SRX661025	testis
LEPOC	SRX543532	heart
LEPOC	SRX661017	heart
LEPOC	SRX661024	ovary
LEPOC	SRX543376	liver
LEPOC	SRX661019	liver
MACMU	SRX081922	brain
MACMU	SRX081923	brain
MACMU	SRX217687	brain
MACMU	SRX196317	brain
MACMU	SRX196326	brain
MACMU	SRX196335	brain
MACMU	SRX080237	brain
MACMU	SRX209571	kidney
MACMU	SRX080239	kidney
MACMU	SRX111328	testis
MACMU	SRX1038925	testis
MACMU	SRX081933	testis
MACMU	SRX081934	testis
MACMU	SRX217688	testis
MACMU	SRX196325	testis
MACMU	SRX196334	testis
MACMU	SRX196343	testis
MACMU	SRX080241	testis
MACMU	SRX494639	heart
MACMU	SRX1038923	heart
MACMU	SRX081927	heart
MACMU	SRX081928	heart
MACMU	SRX196319	heart
MACMU	SRX196328	heart
MACMU	SRX196337	heart
MACMU	SRX111326	liver
MACMU	SRX1038924	liver
MACMU	SRX014842	liver
MACMU	SRX014843	liver
MACMU	SRX014844	liver
MACMU	SRX014845	liver
MACMU	SRX014846	liver
MACMU	SRX014847	liver
MACMU	SRX014848	liver
MACMU	SRX014849	liver
MACMU	SRX014850	liver
MACMU	SRX014851	liver
MACMU	SRX014852	liver
MACMU	SRX014853	liver
MACMU	ERX016335	liver
MACMU	ERX016343	liver
MACMU	SRX081931	liver
MACMU	SRX081932	liver
MACMU	ERX1403307	liver
MACMU	ERX1403306	liver
MACMU	ERX1403308	liver
MACMU	ERX1403309	liver
MACMU	SRX196321	liver
MACMU	SRX196330	liver
MACMU	SRX196339	liver
MACMU	SRX080240	liver
MACMU	SRX209570	cerebellum
MACMU	SRX025579	cerebellum
MACMU	SRX081925	cerebellum
MACMU	SRX081926	cerebellum
MACMU	DRX002703	cerebellum
MACMU	DRX002704	cerebellum
MACMU	SRX209572	lung
MACMU	SRX196322	lung
MACMU	SRX196331	lung
MACMU	SRX196340	lung
MACMU	SRX858064	spleen
MACMU	SRX196324	spleen
MACMU	SRX196333	spleen
MACMU	SRX196342	spleen
MONDO	SRX1462218	uterus
MONDO	SRX1462219	uterus
MONDO	SRX1462220	uterus
MONDO	SRX1462170	uterus
MONDO	SRX1462098	uterus
MONDO	SRX1462099	uterus
MONDO	SRX3316194	brain
MONDO	SRX132008	brain
MONDO	SRX132007	brain
MONDO	SRX217694	brain
MONDO	SRX081894	brain
MONDO	SRX081893	brain
MONDO	SRX149635	brain
MONDO	SRX3316204	kidney
MONDO	SRX149627	kidney
MONDO	SRX149629	blood
MONDO	SRX3316223	testis
MONDO	SRX217697	testis
MONDO	SRX081904	testis
MONDO	SRX081903	testis
MONDO	SRX149630	testis
MONDO	SRX3316199	heart
MONDO	SRX081898	heart
MONDO	SRX081897	heart
MONDO	SRX149631	heart
MONDO	SRX217695	ovary
MONDO	SRX328081	ovary
MONDO	SRX149633	ovary
MONDO	ERX016329	liver
MONDO	ERX016333	liver
MONDO	ERX016352	liver
MONDO	SRX3316209	liver
MONDO	SRX132010	liver
MONDO	SRX132009	liver
MONDO	SRX081902	liver
MONDO	SRX081901	liver
MONDO	SRX149634	liver
MONDO	ERX1403288	liver
MONDO	ERX1403330	liver
MONDO	ERX1403345	liver
MONDO	SRX1629207	placenta
MONDO	SRX217696	placenta
MONDO	SRX328082	placenta
MONDO	SRX328083	placenta
MONDO	SRX081896	cerebellum
MONDO	SRX081895	cerebellum
MONDO	SRX3316214	lung
MONDO	SRX149628	lung
MOUSE	SRX4744186	uterus
MOUSE	SRX4744187	uterus
MOUSE	ERX2187492	pancreas
MOUSE	ERX2187493	pancreas
MOUSE	ERX2187494	pancreas
MOUSE	SRX217689	brain
MOUSE	SRX262971	brain
MOUSE	SRX262970	brain
MOUSE	SRX081905	brain
MOUSE	SRX081906	brain
MOUSE	SRX081907	brain
MOUSE	SRX080230	brain
MOUSE	SRX196273	brain
MOUSE	SRX196281	brain
MOUSE	SRX196264	brain
MOUSE	ERX1174326	brain
MOUSE	ERX1174329	brain
MOUSE	ERX1174306	brain
MOUSE	ERX1174309	brain
MOUSE	ERX1174310	brain
MOUSE	ERX1174313	brain
MOUSE	ERX1174314	brain
MOUSE	ERX1174317	brain
MOUSE	ERX1174318	brain
MOUSE	ERX1174321	brain
MOUSE	ERX1174322	brain
MOUSE	ERX1174325	brain
MOUSE	SRX211701	brain
MOUSE	SRX211702	brain
MOUSE	SRX211703	brain
MOUSE	SRX219280	brain
MOUSE	ERX2187466	brain
MOUSE	ERX2187467	brain
MOUSE	ERX2187468	brain
MOUSE	SRX191149	brain
MOUSE	SRX191150	brain
MOUSE	SRX2334715	intestine
MOUSE	SRX2334716	intestine
MOUSE	SRX2334717	intestine
MOUSE	SRX2334718	intestine
MOUSE	SRX2334719	intestine
MOUSE	SRX2334720	intestine
MOUSE	SRX1603101	intestine
MOUSE	SRX1603102	intestine
MOUSE	SRX1603271	intestine
MOUSE	SRX1603272	intestine
MOUSE	SRX1603017	kidney
MOUSE	SRX1603018	kidney
MOUSE	SRX1603137	kidney
MOUSE	SRX1603138	kidney
MOUSE	SRX217693	testis
MOUSE	SRX263004	testis
MOUSE	SRX263005	testis
MOUSE	SRX081920	testis
MOUSE	SRX081921	testis
MOUSE	SRX080234	testis
MOUSE	SRX196280	testis
MOUSE	SRX196289	testis
MOUSE	SRX196272	testis
MOUSE	ERX1174328	testis
MOUSE	ERX1174308	testis
MOUSE	ERX1174312	testis
MOUSE	ERX1174316	testis
MOUSE	ERX1174320	testis
MOUSE	ERX1174324	testis
MOUSE	SRX219282	testis
MOUSE	SRX1038931	testis
MOUSE	SRX262950	stomach
MOUSE	SRX262949	stomach
MOUSE	SRX1603302	stomach
MOUSE	SRX1603303	stomach
MOUSE	SRX1603121	stomach
MOUSE	SRX1603122	stomach
MOUSE	ERX2187498	stomach
MOUSE	ERX2187499	stomach
MOUSE	ERX2187500	stomach
MOUSE	SRX262994	heart
MOUSE	SRX262999	heart
MOUSE	SRX081911	heart
MOUSE	SRX081912	heart
MOUSE	SRX081913	heart
MOUSE	ERX012344	heart
MOUSE	ERX012348	heart
[truncated: 51,834 more rows]
