# Supplementary material for: Unveiling the functional fate of duplicated genes through expression profiling and structural analysis
Source: HighWire-hosted journal article supplement (doi:10.1101/gr.280166.124), 2025-08-14
Supplement: Supplemental_Table_S7.xlsx [file Supplemental_Table_S7.xlsx]

## Sheet: Supplemental_Table_S7
Supplemental Table S7. Table showing the differences in branch length (asymmetry strength) and the delta LDDT between MDO-og1 and LDO-og2. The columns indicate: fam_id: family ID from PANTHER database, ldo_branch_length: branch length of the LDO copy, mdo_branch_length: branch length of the MDO copy, species: mnemonic of the species where the duplication is observed, ldo_gene: LDO gene ID, mdo_ge…
fam_id	ldo_branch_length	mdo_branch_length	species	ldo_gene	mdo_gene	struct_mdo_og1_lddt	struct_ldo_og2_lddt	delta_sym	delta_lddt
10003	0.147	0.292	AMBTC	U5D3P0	U5DDV0	0.9492	0.9578	0.145	0.0086
10015	0.081	0.353	AMBTC	U5CZX6	U5DG16	0.7773	0.8285	0.272	0.0512
10015	0.145	0.25	AMBTC	U5CZX6	W1PT52	0.9112	0.7982	0.105	-0.113
10015	0.12	0.44	AMBTC	U5CZX6	W1P0P7	0.8239	0.8316	0.32	0.0077
10015	0.195	0.268	AMBTC	W1NQR1	U5DFW5	0.8021	0.812	0.073	0.0099
10015	0.195	0.567	AMBTC	W1NQR1	W1NJ12	0.8695	0.812	0.372	-0.0575
10015	0.151	0.272	AMBTC	U5DFW5	W1NDG4	0.8368	0.8562	0.121	0.0194
10015	0.114	0.152	AMBTC	W1NQR1	W1NRD5	0.8356	0.8236	0.038	-0.012
10026	0.162	0.433	AMBTC	U5D644	W1PYT2	0.7586	0.7911	0.271	0.0325
10030	0.17	0.189	AMBTC	U5DG98	W1NH51	0.9093	0.9332	0.019	0.0239
10031	0	0	AMBTC	Q70Y12	W1NYB8	1	1	0	0
10091	0.3	0.331	AMBTC	W1NF27	W1NFX5	0.8964	0.9103	0.031	0.0139
10106	0.372	0.392	AMBTC	W1PTG2	W1NH32	0.9012	0.8973	0.02	-0.0039
10108	0.247	0.319	AMBTC	W1PE59	W1NH05	0.821	0.9042	0.072	0.0832
10108	0.247	0.356	AMBTC	W1PE59	U5D3E2	0.8529	0.9042	0.109	0.0513
10108	0.247	0.256	AMBTC	W1PE59	U5DAT7	0.8601	0.9042	0.009	0.0441
10108	0.23	0.248	AMBTC	W1PQ41	W1PK51	0.9051	0.7876	0.018	-0.1175
10108	0.309	0.317	AMBTC	U5CZB9	U5DEF0	0.9359	0.8793	0.008	-0.0566
10110	0.217	0.255	AMBTC	U5D7U2	W1PWA7	0.7984	0.8985	0.038	0.1001
10110	0.217	0.222	AMBTC	U5D7U2	U5D615	0.8832	0.8985	0.005	0.0153
10110	0.2	0.303	AMBTC	U5D7U2	W1PI39	0.8481	0.6609	0.103	-0.1872
10113	0.032	0.046	AMBTC	W1P7A0	U5D4Z3	0.9924	0.9767	0.014	-0.0157
10114	0.214	0.224	AMBTC	W1NIK6	W1PJA3	0.9648	0.9821	0.01	0.0173
10121	0.197	0.214	AMBTC	W1Q0T0	W1NPB3	0.9592	0.9457	0.017	-0.0135
10134	0.093	0.101	AMBTC	W1NN60	W1NSI5	0.9793	0.87	0.008	-0.1093
10168	0.163	0.322	AMBTC	W1PF59	W1NPD5	0.9051	0.9324	0.159	0.0273
10168	0.163	0.435	AMBTC	W1PF59	U5CYS5	0.7773	0.9324	0.272	0.1551
10168	0.163	0.405	AMBTC	W1PF59	W1Q0P8	0.7791	0.9324	0.242	0.1533
10168	0.405	0.443	AMBTC	W1NPD5	U5CUD3	0.8706	0.905	0.038	0.0344
10168	0.405	0.469	AMBTC	W1NPD5	U5D3C3	0.8302	0.9085	0.064	0.0783
10168	0.405	0.43	AMBTC	W1NPD5	U5D3V3	0.8659	0.905	0.025	0.0391
10177	0.255	0.272	AMBTC	U5DDD7	W1NMG8	0.833	0.8656	0.017	0.0326
10177	0.368	0.441	AMBTC	W1NXX5	W1P5G1	0.7385	0.7595	0.073	0.021
10177	0.368	0.636	AMBTC	W1NXX5	W1NUR1	0.7263	0.6989	0.268	-0.0274
10177	0.368	0.401	AMBTC	W1NXX5	U5D874	0.7349	0.6989	0.033	-0.036
10177	0.368	0.459	AMBTC	W1NXX5	U5CZ45	0.7301	0.6989	0.091	-0.0312
10177	0.297	0.577	AMBTC	W1P5G1	W1PUD0	0.7532	0.7815	0.28	0.0283
10182	0.433	0.491	AMBTC	W1PX53	U5DA29	0.8815	0.8229	0.058	-0.0586
10188	0.138	0.186	AMBTC	U5CWJ3	W1NY43	0.8032	0.9002	0.048	0.097
10188	0.221	0.312	AMBTC	U5D8L2	W1NKG8	0.8845	0.8596	0.091	-0.0249
10188	0.102	0.118	AMBTC	W1NKG8	U5D428	0.863	0.9217	0.016	0.0587
10201	0.342	0.354	AMBTC	U5D7X4	W1P1E5	0.7835	0.3773	0.012	-0.4062
10202	0.32	0.389	AMBTC	W1PC62	W1NQ31	0.8562	0.8517	0.069	-0.0045
10209	0.348	0.483	AMBTC	W1NL42	W1NK65	0.8176	0.8729	0.135	0.0553
10209	0.235	0.316	AMBTC	U5CYV4	W1NSU0	0.8691	0.8883	0.081	0.0192
10209	0.19	0.207	AMBTC	U5CYV4	U5D467	0.9603	0.9602	0.017	-0.0001
10210	0.176	0.179	AMBTC	U5DCI7	W1PND3	0.9482	0.9498	0.003	0.0016
10210	0.043	0.06	AMBTC	W1PGY9	W1PV73	0.9101	0.9187	0.017	0.0086
10218	0.4	0.545	AMBTC	W1PMM3	W1PTH2	0.6881	0.6576	0.145	-0.0305
10218	0.301	0.34	AMBTC	W1PTH2	U5D5G0	0.8021	0.7789	0.039	-0.0232
10218	0.159	0.236	AMBTC	W1PTH2	U5CQT3	0.8568	0.8482	0.077	-0.0086
10219	0.304	0.406	AMBTC	W1PGQ4	W1NNR9	0.916	0.8911	0.102	-0.0249
10219	0.19	0.203	AMBTC	W1PGQ4	W1PJ88	0.9509	0.8506	0.013	-0.1003
10219	0.402	0.678	AMBTC	U5D8K5	U5D2S1	0.8327	0.8761	0.276	0.0434
10241	0.699	0.795	AMBTC	W1PDY6	U5D433	0.6759	0.6984	0.096	0.0225
10245	0.26	0.306	AMBTC	W1P7L7	W1NSB0	0.8923	0.8548	0.046	-0.0375
10252	0.189	0.189	AMBTC	W1NQ90	U5CXS2	0.8425	0.8195	0	-0.023
10252	0.074	0.091	AMBTC	W1NEF6	W1P484	0.7736	0.8197	0.017	0.0461
10252	0.296	0.395	AMBTC	W1P484	W1NI10	0.7992	0.739	0.099	-0.0602
10257	0.146	0.169	AMBTC	W1Q0R1	W1NNS4	0.9266	0.9219	0.023	-0.0047
10257	0.146	0.18	AMBTC	W1Q0R1	W1P023	0.939	0.9219	0.034	-0.0171
10257	0.146	0.238	AMBTC	W1Q0R1	W1P135	0.9057	0.9176	0.092	0.0119
10281	0.18	0.398	AMBTC	W1NH97	W1NQ71	0.8863	0.9219	0.218	0.0356
10285	0.314	0.425	AMBTC	W1P7I3	W1NZ01	0.6109	0.8634	0.111	0.2525
10285	0.13	0.196	AMBTC	W1PRY0	U5CX30	0.9042	0.9261	0.066	0.0219
10285	0.142	0.159	AMBTC	U5CX30	U5D9I4	0.942	0.9514	0.017	0.0094
10286	0.04	0.058	AMBTC	W1NHP8	W1PQ48	0.9686	0.9547	0.018	-0.0139
10286	0.028	0.034	AMBTC	W1P0M0	U5DH94	0.9376	0.9557	0.006	0.0181
10288	0.258	0.333	AMBTC	W1PU48	W1PNI4	0.8177	0.8153	0.075	-0.0024
10288	0.451	0.531	AMBTC	U5CZP6	W1NYE1	0.7259	0.772	0.08	0.0461
10288	0.307	0.366	AMBTC	U5CZP6	W1PSA7	0.8119	0.8145	0.059	0.0026
10288	0.121	0.159	AMBTC	W1NYE1	W1NRU0	0.7999	0.8719	0.038	0.072
10288	0.475	0.549	AMBTC	U5D1I1	W1PIK4	0.7591	0.8232	0.074	0.0641
10288	0.475	0.531	AMBTC	U5D1I1	W1PHJ8	0.7709	0.8013	0.056	0.0304
10288	0.475	0.583	AMBTC	U5D1I1	W1NQM4	0.7636	0.8013	0.108	0.0377
10288	0.475	0.535	AMBTC	U5D1I1	W1NFD8	0.7836	0.8232	0.06	0.0396
10288	0.311	0.529	AMBTC	W1PIK4	U5D1X6	0.8009	0.8127	0.218	0.0118
10288	0.314	0.429	AMBTC	W1P0D8	W1NU12	0.7919	0.779	0.115	-0.0129
10288	0.123	0.349	AMBTC	W1NU12	W1P5E2	0.731	0.846	0.226	0.115
10291	0.351	0.403	AMBTC	U5D721	W1Q0C4	0.8376	0.8715	0.052	0.0339
10302	0.338	0.554	AMBTC	U5CZX7	U5DC96	0.7869	0.8205	0.216	0.0336
10314	0.157	0.346	AMBTC	U5DFL6	W1NIG6	0.9281	0.911	0.189	-0.0171
10314	0.15	0.154	AMBTC	U5DFL6	W1NNH8	0.9536	0.915	0.004	-0.0386
10314	0.126	0.137	AMBTC	U5DFL6	W1NDT2	0.9289	0.9178	0.011	-0.0111
10314	0.192	0.256	AMBTC	W1NDT2	W1NDH2	0.8938	0.9384	0.064	0.0446
10315	0.069	0.102	AMBTC	U5CZM7	W1Q051	0.9542	0.9622	0.033	0.008
10315	0.069	0.161	AMBTC	U5CZM7	W1NNY2	0.9338	0.9622	0.092	0.0284
10315	0.069	0.297	AMBTC	U5CZM7	W1NE48	0.9156	0.926	0.228	0.0104
10332	0.163	0.193	AMBTC	W1NUS3	W1NTF1	0.932	0.9486	0.03	0.0166
10332	0.413	0.486	AMBTC	W1PFM1	W1P1M9	0.8977	0.8951	0.073	-0.0026
10334	0.148	0.19	AMBTC	W1PV75	W1PPB6	0.919	0.8703	0.042	-0.0487
10334	0.504	0.516	AMBTC	W1PV75	W1PH28	0.8682	0.8703	0.012	0.0021
10334	0.212	0.242	AMBTC	W1PH28	W1PBI4	0.98	0.9875	0.03	0.0075
10334	0.212	0.258	AMBTC	W1PH28	W1PHT7	0.922	0.9872	0.046	0.0652
10335	0.136	0.136	AMBTC	W1NWS2	W1NHJ5	0.9603	0.9646	0	0.0043
10336	0.24	0.407	AMBTC	W1PBB3	W1PC16	0.8494	0.8934	0.167	0.044
10352	0.41	0.43	AMBTC	W1PKT1	U5CTH5	0.8463	0.8618	0.02	0.0155
10352	0.497	0.654	AMBTC	W1NFP8	W1NGJ9	0.8623	0.723	0.157	-0.1393
10352	0.497	0.558	AMBTC	W1NFP8	W1NQ21	0.8739	0.723	0.061	-0.1509
10352	0.323	0.374	AMBTC	W1NQ21	W1NUS0	0.8496	0.844	0.051	-0.0056
10352	0.061	0.151	AMBTC	W1PY56	W1PGE8	0.8771	0.8114	0.09	-0.0657
10353	0.25	0.31	AMBTC	W1PXY9	W1NQP6	0.873	0.8592	0.06	-0.0138
10353	0.25	0.255	AMBTC	W1PXY9	W1PNI8	0.8948	0.8592	0.005	-0.0356
10353	0.154	0.324	AMBTC	W1PXY9	U5DAK9	0.8518	0.8592	0.17	0.0074
10353	0.149	0.177	AMBTC	W1NQP6	W1PG60	0.9311	0.9351	0.028	0.004
10353	0.149	0.175	AMBTC	W1NQP6	W1PAM9	0.926	0.9299	0.026	0.0039
10353	0.149	0.158	AMBTC	W1NQP6	W1PGW7	0.9693	0.9318	0.009	-0.0375
10353	0.363	0.437	AMBTC	U5CUR2	W1PEP6	0.8873	0.8786	0.074	-0.0087
10353	0.363	0.41	AMBTC	U5CUR2	W1P3V4	0.9005	0.8954	0.047	-0.0051
10353	0.363	0.41	AMBTC	U5CUR2	U5D4A3	0.874	0.9198	0.047	0.0458
10353	0.363	0.517	AMBTC	U5CUR2	W1P968	0.8808	0.8786	0.154	-0.0022
10353	0.394	0.448	AMBTC	W1PNM9	W1PUY4	0.9418	0.971	0.054	0.0292
10353	0.394	0.4	AMBTC	W1PNM9	W1PU96	0.9656	0.9617	0.006	-0.0039
10353	0.603	0.752	AMBTC	U5DDI2	W1P6K3	0.5465	0.8069	0.149	0.2604
10358	0.152	0.183	AMBTC	U5D9W4	W1PP27	0.7475	0.749	0.031	0.0015
10361	0.297	0.402	AMBTC	U5D3I7	W1PLC4	0.8809	0.8693	0.105	-0.0116
10362	0.143	0.189	AMBTC	W1PEM3	W1PT25	0.9095	0.9403	0.046	0.0308
10362	0.18	0.313	AMBTC	W1PEM3	U5D0G3	0.9431	0.9476	0.133	0.0045
10362	0.134	0.154	AMBTC	W1PT25	W1PTP0	0.9294	0.9062	0.02	-0.0232
10362	0.134	0.136	AMBTC	W1PT25	W1PMF7	0.9264	0.9062	0.002	-0.0202
10366	0.527	0.623	AMBTC	W1PWV2	W1PGZ1	0.8099	0.7626	0.096	-0.0473
10366	0.527	0.651	AMBTC	W1PWV2	W1P9X2	0.6301	0.7073	0.124	0.0772
10366	0.527	0.547	AMBTC	W1PWV2	W1PUQ2	0.8268	0.7199	0.02	-0.1069
10366	0.527	0.544	AMBTC	W1PWV2	U5D8W9	0.8468	0.7199	0.017	-0.1269
10366	0.149	0.194	AMBTC	W1PWV2	W1PXN5	0.9651	0.9708	0.045	0.0057
10366	0.149	0.218	AMBTC	W1PWV2	W1PYQ0	0.9588	0.9743	0.069	0.0155
10366	0.149	0.293	AMBTC	W1PWV2	W1PRL1	0.8928	0.9576	0.144	0.0648
10366	0.149	0.171	AMBTC	W1PWV2	W1PXG8	0.9718	0.7199	0.022	-0.2519
10366	0.237	0.25	AMBTC	W1PLS5	W1PMI1	0.9573	0.9254	0.013	-0.0319
10366	0.377	0.385	AMBTC	W1PU00	W1PUM2	0.8827	0.8584	0.008	-0.0243
10366	0.377	0.402	AMBTC	W1PU00	W1PNC5	0.9293	0.922	0.025	-0.0073
10381	0.486	0.49	AMBTC	W1P3R1	W1PLN1	0.714	0.8515	0.004	0.1375
10381	0.337	0.503	AMBTC	W1PNQ2	W1NSF0	0.9202	0.8777	0.166	-0.0425
10381	0.337	0.548	AMBTC	W1PNQ2	W1P3F2	0.9006	0.8542	0.211	-0.0464
10381	0.213	0.509	AMBTC	W1PNQ2	Q70XY2	0.8986	0.8542	0.296	-0.0444
10383	0.194	0.24	AMBTC	W1P7L9	U5D0F3	0.811	0.896	0.046	0.085
10383	0.274	0.295	AMBTC	W1PQR4	W1PHD2	0.8324	0.8533	0.021	0.0209
10388	0.286	0.56	AMBTC	W1PGC8	W1NUX1	0.782	0.8006	0.274	0.0186
10394	0.047	0.068	AMBTC	W1NV66	U5DA24	0.9768	0.9706	0.021	-0.0062
10404	0.237	0.287	AMBTC	U5CPU4	W1NE27	0.8483	0.8895	0.05	0.0412
10404	0.274	0.278	AMBTC	U5CPU4	U5D1C0	0.9134	0.8931	0.004	-0.0203
10410	0	0.006	AMBTC	U5DDA2	W1PTY3	0.9791	0.9539	0.006	-0.0252
10426	0.161	0.321	AMBTC	W1NE80	W1PP35	0.825	0.8397	0.16	0.0147
10426	0.281	0.459	AMBTC	W1NE80	W1PGX4	0.8751	0.7488	0.178	-0.1263
10430	0.307	0.407	AMBTC	W1PY67	W1NPK4	0.7229	0.8318	0.1	0.1089
10438	0.522	0.804	AMBTC	U5CYL6	W1PZS4	0.7058	0.6351	0.282	-0.0707
10438	0.606	0.685	AMBTC	U5CYL6	W1NUG2	0.8426	0.6523	0.079	-0.1903
10438	0.155	0.405	AMBTC	W1NUG2	W1PW25	0.8544	0.8207	0.25	-0.0337
10438	0.443	0.527	AMBTC	W1NUG2	W1PB45	0.8685	0.879	0.084	0.0105
10438	0.443	0.476	AMBTC	W1NUG2	W1P0A1	0.8911	0.879	0.033	-0.0121
10438	0.443	0.531	AMBTC	W1NUG2	W1NKA4	0.8872	0.8207	0.088	-0.0665
10438	0.372	0.392	AMBTC	W1P0A1	W1NUQ4	0.8987	0.9127	0.02	0.014
10442	0.132	0.132	AMBTC	W1P5H0	W1PEP0	0.9875	0.9953	0	0.0078
10459	0.373	0.534	AMBTC	U5D6J7	U5D9N4	0.7206	0.8828	0.161	0.1622
10460	0.472	0.728	AMBTC	W1P337	W1Q007	0.9	0.8583	0.256	-0.0417
10476	0.208	0.244	AMBTC	U5DBU5	U5D4X4	0.911	0.6518	0.036	-0.2592
10497	0.092	0.108	AMBTC	U5CXM0	W1P254	0.9863	0.9953	0.016	0.009
10501	0.179	0.18	AMBTC	W1Q0B1	W1PAZ0	0.8015	0.8396	0.001	0.0381
10502	0.293	0.296	AMBTC	W1NKC0	W1NL18	0.9362	0.9598	0.003	0.0236
10509	0.181	0.369	AMBTC	U5CX90	U5CZ55	0.9114	0.9191	0.188	0.0077
10516	0.244	0.527	AMBTC	W1NY70	W1PLC9	0.7217	0.7585	0.283	0.0368
10527	0.135	0.158	AMBTC	W1PF60	W1NNS5	0.9353	0.9439	0.023	0.0086
10535	0.316	0.714	AMBTC	U5DFX7	W1NSF3	0.8926	0.829	0.398	-0.0636
10535	0.164	0.298	AMBTC	U5DFX7	W1PN09	0.9372	0.9093	0.134	-0.0279
10543	0.209	0.314	AMBTC	U5D425	W1PZE4	0.9047	0.9668	0.105	0.0621
10543	0.527	0.62	AMBTC	W1PVR9	W1NUN2	0.6297	0.6473	0.093	0.0176
10543	0.358	0.369	AMBTC	W1NGY7	W1NHS9	0.8695	0.7536	0.011	-0.1159
10543	0.158	0.171	AMBTC	W1NUN2	U5D374	0.8704	0.884	0.013	0.0136
10543	0.145	0.18	AMBTC	W1PVR9	W1PP70	0.9576	0.855	0.035	-0.1026
10545	0.234	0.269	AMBTC	W1NH98	W1NRC3	0.8897	0.8794	0.035	-0.0103
10551	0.244	0.301	AMBTC	W1NJG0	W1NGE2	0.8928	0.884	0.057	-0.0088
10551	0.239	0.334	AMBTC	W1NGE2	W1PGI0	0.8886	0.8433	0.095	-0.0453
10551	0.239	0.285	AMBTC	W1NGE2	W1NFG8	0.9448	0.954	0.046	0.0092
10553	0.707	0.838	AMBTC	W1PP03	W1PZJ3	0.8576	0.7857	0.131	-0.0719
10556	0.219	0.285	AMBTC	W1NDJ4	W1NET2	0.9038	0.8897	0.066	-0.0141
10578	0.352	0.369	AMBTC	W1NVK9	W1PCY1	0.4821	0.68	0.017	0.1979
10579	0.51	0.831	AMBTC	W1PMJ3	U5DA52	0.5553	0.1714	0.321	-0.3839
10579	0.329	0.777	AMBTC	U5CYF4	W1NS26	0.6214	0.6381	0.448	0.0167
10579	0.39	0.457	AMBTC	W1PMJ3	U5D0F1	0.8436	0.8495	0.067	0.0059
10585	0.127	0.241	AMBTC	W1PMX7	W1PJ90	0.9033	0.9465	0.114	0.0432
10585	0.078	0.089	AMBTC	W1PMX7	W1Q0M5	0.9895	0.9693	0.011	-0.0202
10585	0.093	0.219	AMBTC	W1NQT9	W1NS87	0.9698	0.9276	0.126	-0.0422
10593	0.095	0.222	AMBTC	W1P1R3	W1PF66	0.7039	0.8572	0.127	0.1533
10593	0.095	0.165	AMBTC	W1P1R3	U5D0B8	0.7202	0.8615	0.07	0.1413
10593	0.104	0.265	AMBTC	U5D0B8	U5D6M3	0.7603	0.8087	0.161	0.0484
10593	0.103	0.2	AMBTC	W1P1R3	U5CUI9	0.8574	0.876	0.097	0.0186
10593	0.103	0.133	AMBTC	W1P1R3	U5D4M7	0.854	0.8322	0.03	-0.0218
10593	0.103	0.121	AMBTC	W1P1R3	W1PC96	0.8726	0.876	0.018	0.0034
10593	0.103	0.138	AMBTC	W1P1R3	U5CW60	0.8314	0.832	0.035	0.0006
10621	0.203	0.229	AMBTC	W1PHF9	W1PEF1	0.8546	0.8655	0.026	0.0109
10623	0.304	0.409	AMBTC	W1PF67	W1NGS3	0.8761	0.8765	0.105	0.0004
10625	0.567	0.577	AMBTC	U5D6R7	U5D3F3	0.6405	0.7355	0.01	0.095
10625	0.567	0.577	AMBTC	U5D6R7	W1NXH7	0.7127	0.7382	0.01	0.0255
10625	0.196	0.258	AMBTC	W1PXY4	W1NGP3	0.8523	0.905	0.062	0.0527
10625	0.098	0.181	AMBTC	W1P6A4	U5DE08	0.9225	0.9001	0.083	-0.0224
10629	0.302	0.326	AMBTC	U5CQZ8	W1PTM9	0.8801	0.859	0.024	-0.0211
10634	0.19	0.282	AMBTC	W1P7I1	W1PSR8	0.8683	0.9253	0.092	0.057
10634	0.19	0.371	AMBTC	W1P7I1	W1PWK5	0.8596	0.8548	0.181	-0.0048
10634	0.19	0.327	AMBTC	W1P7I1	W1PUK9	0.894	0.8784	0.137	-0.0156
10639	0.237	0.272	AMBTC	W1PPY4	W1NJ89	0.8413	0.8447	0.035	0.0034
10641	0.202	0.306	AMBTC	U5CXF7	W1NG63	0.8474	0.7867	0.104	-0.0607
10641	0.202	0.234	AMBTC	U5CXF7	U5CXA2	0.8732	0.7544	0.032	-0.1188
10641	0.202	0.227	AMBTC	U5CXF7	W1NFG1	0.8719	0.7867	0.025	-0.0852
10641	0.069	0.212	AMBTC	W1P7G7	W1PFQ6	0.7372	0.8115	0.143	0.0743
10648	0.049	0.102	AMBTC	U5CQS6	W1PIA3	0.9723	0.9798	0.053	0.0075
10682	0.159	0.205	AMBTC	U5D4V1	U5CYG1	0.9277	0.8409	0.046	-0.0868
10687	0.15	0.166	AMBTC	W1P679	U5D5F3	0.8436	0.8866	0.016	0.043
10693	0.797	0.818	AMBTC	W1PCA0	U5D0Z0	0.7505	0.6525	0.021	-0.098
10693	0.797	0.798	AMBTC	W1PCA0	W1PS35	0.7428	0.6525	0.001	-0.0903
10696	0.342	0.711	AMBTC	U5CPR8	U5D2X9	0.8185	0.7824	0.369	-0.0361
10696	0.342	0.683	AMBTC	U5CPR8	U5DEU5	0.809	0.8909	0.341	0.0819
10732	0.124	0.133	AMBTC	W1PKE0	U5D458	0.9603	0.9518	0.009	-0.0085
10742	0.252	0.374	AMBTC	W1PG48	W1PXN1	0.8603	0.7645	0.122	-0.0958
10742	0.294	0.523	AMBTC	W1PG48	U5DD78	0.7521	0.7645	0.229	0.0124
10742	0.111	0.164	AMBTC	W1NUD9	W1PQT7	0.919	0.8775	0.053	-0.0415
10742	0.282	0.309	AMBTC	W1P8X5	U5CXI1	0.8865	0.8939	0.027	0.0074
10742	0.282	0.296	AMBTC	W1P8X5	W1PFV8	0.8994	0.8939	0.014	-0.0055
10742	0.076	0.112	AMBTC	W1PFV8	W1PM43	0.8466	0.9387	0.036	0.0921
10743	0.206	0.29	AMBTC	W1NGV8	U5D8I5	0.9093	0.9332	0.084	0.0239
10744	0.025	0.025	AMBTC	U5CVW0	U5D6Q0	0.93	0.9108	0	-0.0192
10763	0.734	1.022	AMBTC	W1PPV7	W1PVD2	0.6534	0.632	0.288	-0.0214
10766	0.341	0.348	AMBTC	U5DEE3	U5DE68	0.8868	0.8805	0.007	-0.0063
10766	0.212	0.216	AMBTC	W1PIB4	U5D9B1	0.9333	0.9255	0.004	-0.0078
10772	0.163	0.175	AMBTC	W1NF74	W1NUY2	0.9684	0.9685	0.012	0.0001
10774	0.657	0.737	AMBTC	W1NLZ4	U5DCV3	0.6084	0.7056	0.08	0.0972
10774	0.657	0.731	AMBTC	W1NLZ4	U5CWK3	0.6069	0.5736	0.074	-0.0333
10774	0.197	0.259	AMBTC	U5DCV3	W1PMI8	0.9065	0.8798	0.062	-0.0267
10783	0.129	0.265	AMBTC	W1PMW0	W1NGE3	0.7894	0.7896	0.136	0.0002
10783	0.311	0.332	AMBTC	W1NGE3	W1NFG9	0.8295	0.7744	0.021	-0.0551
10783	0.353	0.36	AMBTC	W1PMW0	U5D8M0	0.8167	0.7896	0.007	-0.0271
10788	0.177	0.225	AMBTC	W1PBR9	W1PFS8	0.9003	0.9345	0.048	0.0342
10788	0.177	0.205	AMBTC	W1PBR9	W1NFB4	0.919	0.9345	0.028	0.0155
10788	0.177	0.179	AMBTC	W1PBR9	W1PVQ2	0.9361	0.9384	0.002	0.0023
10788	0.177	0.196	AMBTC	W1PBR9	U5CZC8	0.9417	0.9384	0.019	-0.0033
10791	0.399	0.414	AMBTC	W1PF50	W1PF56	0.7698	0.7354	0.015	-0.0344
10791	0.427	0.427	AMBTC	W1Q131	W1PP30	0.8839	0.9329	0	0.049
10792	0.088	0.095	AMBTC	W1NNH0	U5D125	0.9391	0.907	0.007	-0.0321
10792	0.249	0.257	AMBTC	U5D914	W1NTK7	0.9331	0.9644	0.008	0.0313
10794	0.465	0.672	AMBTC	W1PTW9	W1PLK0	0.7711	0.7229	0.207	-0.0482
10795	0.316	0.354	AMBTC	W1NDH5	W1PUI3	0.825	0.8262	0.038	0.0012
10795	0.316	0.375	AMBTC	W1NDH5	W1PZQ0	0.8198	0.8262	0.059	0.0064
10795	0.316	0.363	AMBTC	W1NDH5	U5DG74	0.8182	0.8262	0.047	0.008
10795	0.296	0.385	AMBTC	W1NM31	W1NN44	0.9122	0.8975	0.089	-0.0147
10795	0.38	0.483	AMBTC	W1PR18	W1P270	0.851	0.9019	0.103	0.0509
10795	0.38	0.455	AMBTC	W1PR18	W1NUK9	0.818	0.9019	0.075	0.0839
10795	0.288	0.461	AMBTC	W1NLI0	U5D332	0.8455	0.8944	0.173	0.0489
10795	0.288	0.357	AMBTC	W1NLI0	W1PTD0	0.8319	0.8944	0.069	0.0625
10795	0.288	0.336	AMBTC	W1NLI0	U5DCV9	0.8989	0.8944	0.048	-0.0045
10795	0.288	0.406	AMBTC	W1NLI0	U5DDC5	0.8513	0.8944	0.118	0.0431
10795	0.288	0.36	AMBTC	W1NLI0	W1P6Q7	0.8705	0.8944	0.072	0.0239
10795	0.288	0.361	AMBTC	W1NLI0	W1P1I0	0.8958	0.8944	0.073	-0.0014
10795	0.288	0.503	AMBTC	W1NLI0	W1PKZ3	0.8069	0.8944	0.215	0.0875
10795	0.288	0.494	AMBTC	W1NLI0	U5D1C9	0.8523	0.8944	0.206	0.0421
10795	0.288	0.342	AMBTC	W1NLI0	U5DDE5	0.8211	0.8944	0.054	0.0733
10795	0.288	0.508	AMBTC	W1NLI0	W1PND1	0.8083	0.8944	0.22	0.0861
10795	0.288	0.459	AMBTC	W1NLI0	W1PBK5	0.8305	0.8944	0.171	0.0639
10795	0.288	0.537	AMBTC	W1NLI0	W1PNF5	0.8301	0.8944	0.249	0.0643
10795	0.251	0.349	AMBTC	W1NLI0	W1P891	0.8494	0.8052	0.098	-0.0442
10797	0.189	0.403	AMBTC	U5CZ85	U5CSG5	0.9186	0.9044	0.214	-0.0142
10797	0.416	0.523	AMBTC	U5CSG5	W1PKI8	0.8009	0.8519	0.107	0.051
10797	0.416	0.523	AMBTC	U5CSG5	U5D445	0.9452	0.9217	0.107	-0.0235
10797	0.416	0.709	AMBTC	U5CSG5	U5DEM1	0.8636	0.8519	0.293	-0.0117
10806	0.083	0.142	AMBTC	W1PDV1	W1NQJ6	0.8304	0.933	0.059	0.1026
10806	0.056	0.127	AMBTC	W1PDV1	W1PDS4	0.9747	0.929	0.071	-0.0457
10809	0.079	0.484	AMBTC	W1P6G8	W1P6V2	0.5937	0.8768	0.405	0.2831
10809	0.288	0.388	AMBTC	W1NYJ3	U5D3P6	0.8467	0.8287	0.1	-0.018
10809	0.288	0.435	AMBTC	W1NYJ3	W1NU41	0.8213	0.8287	0.147	0.0074
10811	0.192	0.198	AMBTC	W1PZ91	W1NMD6	0.8464	0.5536	0.006	-0.2928
10811	0.222	0.412	AMBTC	W1NMD6	W1PJV8	0.849	0.8485	0.19	-0.0005
10811	0.222	0.411	AMBTC	W1NMD6	W1PJ37	0.8485	0.8485	0.189	0
10811	0.222	0.391	AMBTC	W1NMD6	W1PWB7	0.8622	0.8485	0.169	-0.0137
10836	0.093	0.117	AMBTC	U5D3A4	U5CPG1	0.8858	0.919	0.024	0.0332
10853	0.163	0.286	AMBTC	W1PWY4	U5DIE3	0.9202	0.8993	0.123	-0.0209
10869	0.115	0.185	AMBTC	W1P9V7	W1PIE1	0.9188	0.8425	0.07	-0.0763
10871	0.032	0.04	AMBTC	W1PG57	W1P888	0.973	0.9787	0.008	0.0057
10882	0.118	0.124	AMBTC	W1PK36	W1PVU1	0.9822	0.9645	0.006	-0.0177
10891	0.43	0.456	AMBTC	W1PZ29	W1PB90	0.6752	0.5765	0.026	-0.0987
10891	0.467	0.54	AMBTC	W1PB90	W1P593	0.6415	0.7096	0.073	0.0681
10891	0.467	0.685	AMBTC	W1PB90	W1PXC8	0.5666	0.7096	0.218	0.143
10891	0.467	0.467	AMBTC	W1PB90	W1NNC0	0.8017	0.6778	0	-0.1239
10891	0.467	0.57	AMBTC	W1PB90	W1PTR5	0.7677	0.6778	0.103	-0.0899
10891	0.467	0.816	AMBTC	W1PB90	W1NH42	0.6826	0.7096	0.349	0.027
10891	0.467	0.614	AMBTC	W1PB90	W1NJU6	0.7413	0.6778	0.147	-0.0635
10891	0.624	0.675	AMBTC	W1NH42	W1NNJ5	0.6769	0.7079	0.051	0.031
10894	0.773	0.783	AMBTC	W1PAB1	W1NUR4	0.7299	0.6676	0.01	-0.0623
10896	0.209	0.497	AMBTC	U5CM29	W1PBI0	0.7556	0.818	0.288	0.0624
10896	0.231	0.282	AMBTC	U5CM29	W1NSM4	0.8417	0.833	0.051	-0.0087
10903	0.361	0.459	AMBTC	U5DHR9	U5DC30	0.742	0.791	0.098	0.049
10903	0.309	0.315	AMBTC	U5D517	W1NRE7	0.8467	0.8434	0.006	-0.0033
10906	0.372	0.627	AMBTC	W1PHP9	W1PXM5	0.7507	0.7648	0.255	0.0141
10926	0.234	0.287	AMBTC	U5D6N3	W1NVC7	0.9155	0.8991	0.053	-0.0164
10926	0.234	0.246	AMBTC	U5D6N3	W1NEE2	0.9382	0.9186	0.012	-0.0196
10934	0.091	0.231	AMBTC	U5D3B2	W1P2Y5	0.9331	0.9401	0.14	0.007
10938	0.605	0.693	AMBTC	W1NFF4	U5D0L3	0.7486	0.727	0.088	-0.0216
10943	0.117	0.13	AMBTC	W1PCQ6	U5CUL6	0.9552	0.933	0.013	-0.0222
10953	0.726	1.383	AMBTC	W1NQ46	W1P0Q5	0.6573	0.6652	0.657	0.0079
10953	0.726	1.38	AMBTC	W1NQ46	W1PMH5	0.5632	0.6652	0.654	0.102
10953	0.726	1.285	AMBTC	W1NQ46	W1PPE0	0.7074	0.6652	0.559	-0.0422
10956	0.072	0.138	AMBTC	W1PVK5	U5D4U8	0.9663	0.9663	0.066	0
10971	0.159	0.627	AMBTC	W1PT86	W1PFN1	0.8634	0.8805	0.468	0.0171
10972	0.084	0.095	AMBTC	U5CXS1	W1PJK2	0.9516	0.9609	0.011	0.0093
10972	0.099	0.162	AMBTC	W1NIP5	W1PUK8	0.8008	0.8643	0.063	0.0635
10972	0.099	0.123	AMBTC	W1NIP5	W1P4I9	0.8525	0.8613	0.024	0.0088
10980	0.298	0.342	AMBTC	U5D7V1	U5DBV3	0.7087	0.8488	0.044	0.1401
10980	0.298	0.306	AMBTC	U5D7V1	W1PGM5	0.6954	0.8488	0.008	0.1534
10984	0.572	0.582	AMBTC	U5DH44	W1NFH0	0.7779	0.7527	0.01	-0.0252
10992	0.505	0.529	AMBTC	W1P8H6	W1PG59	0.8966	0.9043	0.024	0.0077
10992	0.505	0.744	AMBTC	W1P8H6	W1PB33	0.8154	0.8351	0.239	0.0197
10992	0.505	0.561	AMBTC	W1P8H6	W1PS37	0.8572	0.8875	0.056	0.0303
10992	0.505	0.521	AMBTC	W1P8H6	W1PCP3	0.8917	0.8946	0.016	0.0029
10992	0.505	0.561	AMBTC	W1P8H6	W1P9F0	0.8548	0.893	0.056	0.0382
10992	0.294	0.384	AMBTC	W1PIV1	U5DCX7	0.7893	0.8706	0.09	0.0813
10993	0.15	0.161	AMBTC	W1NQ40	W1NUT1	0.9503	0.7643	0.011	-0.186
10994	0.639	0.667	AMBTC	W1PNL9	W1PDE3	0.7851	0.7538	0.028	-0.0313
10994	0.639	0.667	AMBTC	W1PNL9	W1P859	0.7063	0.8253	0.028	0.119
10994	0.639	0.692	AMBTC	W1PNL9	W1PLS8	0.7116	0.7482	0.053	0.0366
10994	0.639	0.735	AMBTC	W1PNL9	W1NQQ5	0.6878	0.7482	0.096	0.0604
10994	0.639	0.66	AMBTC	W1PNL9	W1P368	0.696	0.7482	0.021	0.0522
11002	0.286	0.362	AMBTC	W1PFE6	W1P036	0.8428	0.8335	0.076	-0.0093
11003	0.57	0.614	AMBTC	U5CWN2	W1NWJ8	0.8171	0.589	0.044	-0.2281
11003	0.222	0.299	AMBTC	W1NWJ8	W1NHD8	0.8429	0.8394	0.077	-0.0035
11003	0.174	0.348	AMBTC	W1NWJ8	W1NGJ1	0.8588	0.8667	0.174	0.0079
11005	0.412	0.555	AMBTC	W1NMY6	W1NM25	0.8968	0.8715	0.143	-0.0253
11006	0.42	0.485	AMBTC	U5D246	W1NRF1	0.7376	0.8481	0.065	0.1105
11006	0.199	0.233	AMBTC	W1NRF1	W1PK17	0.7122	0.7567	0.034	0.0445
11011	0.33	0.457	AMBTC	W1P942	W1PZQ7	0.8389	0.8497	0.127	0.0108
11011	0.381	0.429	AMBTC	W1PZQ7	W1PYN3	0.9177	0.8395	0.048	-0.0782
11014	0.15	0.177	AMBTC	U5D771	W1NTT6	0.9112	0.7715	0.027	-0.1397
11014	0.15	0.157	AMBTC	U5D771	U5D466	0.8456	0.7983	0.007	-0.0473
11014	0.15	0.164	AMBTC	U5D771	W1NSM1	0.9229	0.7718	0.014	-0.1511
11024	0.117	0.117	AMBTC	W1NWK9	U5D1C4	0.9765	0.9758	0	-0.0007
11034	0.193	0.209	AMBTC	U5DFW7	U5D539	0.9185	0.9391	0.016	0.0206
11040	0.238	0.245	AMBTC	W1PKL7	W1PJW0	0.8215	0.8344	0.007	0.0129
11040	0.241	0.276	AMBTC	U5D4L1	U5DGX0	0.8424	0.8203	0.035	-0.0221
11040	0.241	0.427	AMBTC	U5D4L1	U5CY57	0.8495	0.8203	0.186	-0.0292
11040	0.241	0.498	AMBTC	U5D4L1	W1PC88	0.7864	0.7899	0.257	0.0035
11040	0.182	0.349	AMBTC	U5DGX0	U5DAY2	0.6541	0.5832	0.167	-0.0709
11040	0.151	0.258	AMBTC	U5CY57	W1NRA3	0.5785	0.7194	0.107	0.1409
11040	0.151	0.23	AMBTC	U5CY57	U5D3H0	0.8479	0.8455	0.079	-0.0024
11040	0.151	0.258	AMBTC	U5CY57	U5CV22	0.8988	0.7194	0.107	-0.1794
11054	0.435	0.49	AMBTC	W1PRS0	U5CX26	0.8823	0.9033	0.055	0.021
11062	0.131	0.415	AMBTC	W1PQI5	U5CW66	0.7439	0.8682	0.284	0.1243
11062	0.318	0.318	AMBTC	W1NG58	W1NQX4	0.8849	0.8787	0	-0.0062
11062	0.564	0.603	AMBTC	U5D0K2	W1P9P6	0.6522	0.5906	0.039	-0.0616
11062	0.161	0.358	AMBTC	U5D0K2	U5DB78	0.8093	0.679	0.197	-0.1303
11062	0.154	0.363	AMBTC	U5D0K2	W1PJJ7	0.9102	0.8568	0.209	-0.0534
11062	0.328	0.39	AMBTC	W1PG19	U5CXI9	0.8854	0.9112	0.062	0.0258
11062	0.328	0.365	AMBTC	W1PG19	U5CXJ7	0.8687	0.9112	0.037	0.0425
11062	0.334	0.359	AMBTC	U5CXI9	U5D733	0.9141	0.8631	0.025	-0.051
11062	0.334	0.354	AMBTC	U5CXI9	U5D9E0	0.8578	0.8837	0.02	0.0259
11062	0.171	0.258	AMBTC	W1NZL9	U5D435	0.8152	0.8926	0.087	0.0774
11062	0.269	0.423	AMBTC	W1NEQ1	W1PFN9	0.8033	0.8501	0.154	0.0468
11064	0.14	0.194	AMBTC	W1PCW5	W1PGH0	0.767	0.7217	0.054	-0.0453
11064	0.054	0.236	AMBTC	U5CWP9	U5D406	0.799	0.8221	0.182	0.0231
11070	0.549	0.7	AMBTC	U5D1T4	W1P0E7	0.643	0.6594	0.151	0.0164
11071	0.117	0.237	AMBTC	W1PIL0	W1PKP2	0.9033	0.9188	0.12	0.0155
11073	0.138	0.142	AMBTC	W1PPK6	W1P585	0.9815	0.9661	0.004	-0.0154
11081	0.293	0.366	AMBTC	U5D0K8	W1PAM5	0.7126	0.6512	0.073	-0.0614
11089	0.866	1.019	AMBTC	W1NSM0	W1NI91	0.5983	0.5958	0.153	-0.0025
11093	0.541	0.61	AMBTC	U5D3I2	W1Q0R5	0.8363	0.8862	0.069	0.0499
11097	1.017	1.028	AMBTC	W1PR78	W1PWV7	0.7754	0.7862	0.011	0.0108
11097	1.017	1.181	AMBTC	W1PR78	U5DB17	0.8392	0.7875	0.164	-0.0517
11108	0.095	0.14	AMBTC	W1NKQ0	U5D238	0.8569	0.8673	0.045	0.0104
11119	0.19	0.26	AMBTC	W1PYP2	U5CW71	0.8748	0.8949	0.07	0.0201
11119	0.263	0.316	AMBTC	W1NK09	U5DDX9	0.9136	0.9296	0.053	0.016
11119	0.263	0.286	AMBTC	W1NK09	W1NW97	0.9119	0.9296	0.023	0.0177
11119	0.263	0.287	AMBTC	W1NK09	W1NRP2	0.925	0.9252	0.024	0.0002
11119	0.263	0.353	AMBTC	W1NK09	U5CZ62	0.8991	0.8698	0.09	-0.0293
11122	0.213	0.23	AMBTC	W1PIB2	W1Q0X0	0.9153	0.9277	0.017	0.0124
11122	0.213	0.269	AMBTC	W1PIB2	W1PTB9	0.632	0.8474	0.056	0.2154
11125	0.209	0.289	AMBTC	W1P2U7	W1NL62	0.8134	0.8132	0.08	-0.0002
11132	0.702	0.762	AMBTC	W1NXA5	U5DAK5	0.7692	0.8068	0.06	0.0376
11132	0.702	0.742	AMBTC	W1NXA5	W1NXM4	0.7672	0.8068	0.04	0.0396
11132	0.052	0.1	AMBTC	W1NXA5	W1Q0I1	0.9674	0.8841	0.048	-0.0833
11132	0.117	0.391	AMBTC	U5DAK5	U5D0D9	0.8797	0.892	0.274	0.0123
11132	0.144	0.247	AMBTC	W1PBB8	W1PC52	0.8824	0.9445	0.103	0.0621
11132	0.085	0.176	AMBTC	W1P939	W1PMI3	0.9553	0.9021	0.091	-0.0532
11132	0.095	0.1	AMBTC	U5DDN7	W1PTR4	0.9079	0.9098	0.005	0.0019
11132	0.219	0.228	AMBTC	W1PDV9	W1NQS8	0.8719	0.762	0.009	-0.1099
11132	0.084	0.088	AMBTC	U5CW89	W1P1Q5	0.9367	0.8982	0.004	-0.0385
11132	0.184	0.208	AMBTC	W1PPV2	U5DBF4	0.8695	0.8213	0.024	-0.0482
11136	0.199	0.227	AMBTC	W1PDH1	W1PJ91	0.8087	0.7782	0.028	-0.0305
11141	0.261	0.338	AMBTC	W1NJI6	W1P397	0.8912	0.8716	0.077	-0.0196
11141	0.222	0.244	AMBTC	W1NJI6	U5CQY5	0.9336	0.935	0.022	0.0014
11143	0.09	0.097	AMBTC	W1PVD8	U5D8M2	0.9572	0.9545	0.007	-0.0027
11157	0.382	0.524	AMBTC	W1PKF5	U5DB29	0.865	0.8556	0.142	-0.0094
11178	0.437	0.538	AMBTC	U5D508	W1PI20	0.9165	0.9297	0.101	0.0132
11183	0.125	0.328	AMBTC	U5DCH5	W1NJW3	0.8548	0.8093	0.203	-0.0455
11183	0.329	0.475	AMBTC	W1NJW3	W1PWY3	0.945	0.8449	0.146	-0.1001
11183	0.12	0.506	AMBTC	U5DCH5	W1PXS3	0.8111	0.869	0.386	0.0579
11183	0.183	0.199	AMBTC	W1NXR3	W1P6I9	0.8702	0.8688	0.016	-0.0014
11203	0.58	0.672	AMBTC	W1NK91	W1NH44	0.7568	0.7215	0.092	-0.0353
11203	0.085	0.092	AMBTC	W1NH44	W1NHI4	0.9464	0.9412	0.007	-0.0052
11205	0.015	0.015	AMBTC	W1NVE5	U5D4A2	0.997	0.985	0	-0.012
11206	0.421	0.463	AMBTC	W1PCG4	W1PDE8	0.9282	0.9346	0.042	0.0064
11206	0.421	0.682	AMBTC	W1PCG4	U5CXX6	0.8753	0.9346	0.261	0.0593
11206	0.226	0.28	AMBTC	W1NIA1	W1NHI9	0.9303	0.867	0.054	-0.0633
11206	0.223	0.264	AMBTC	W1Q073	W1Q077	0.9668	0.8805	0.041	-0.0863
11206	0.257	0.309	AMBTC	U5D5A8	U5D5X5	0.9657	0.9498	0.052	-0.0159
11206	0.257	0.267	AMBTC	U5D5A8	U5DB49	0.908	0.9677	0.01	0.0597
11206	0.293	0.48	AMBTC	W1PCG4	W1PF22	0.9291	0.9445	0.187	0.0154
11206	0.293	0.406	AMBTC	W1PCG4	W1PF46	0.9414	0.9445	0.113	0.0031
11206	0.293	0.48	AMBTC	W1PCG4	W1PF07	0.9415	0.9364	0.187	-0.0051
11206	0.293	0.47	AMBTC	W1PCG4	W1P6Z5	0.948	0.9445	0.177	-0.0035
11206	0.365	0.46	AMBTC	U5CLS2	U5CW70	0.8453	0.8265	0.095	-0.0188
11206	0.365	0.425	AMBTC	U5CLS2	U5DJ81	0.8493	0.8265	0.06	-0.0228
11206	0.209	0.27	AMBTC	U5CW70	W1PAR6	0.9336	0.954	0.061	0.0204
11206	0.309	0.68	AMBTC	U5DJ81	W1NX30	0.8953	0.9503	0.371	0.055
11206	0.372	0.428	AMBTC	U5DD65	U5DDD2	0.9164	0.9303	0.056	0.0139
11208	0.288	0.296	AMBTC	U5DCY0	W1P999	0.8356	0.8478	0.008	0.0122
11208	0.288	0.301	AMBTC	U5DCY0	U5DF87	0.8222	0.8809	0.013	0.0587
11214	0.194	0.533	AMBTC	W1P6Q1	W1NV59	0.7209	0.6072	0.339	-0.1137
11214	0.193	0.238	AMBTC	W1NV59	W1NZX7	0.8055	0.7951	0.045	-0.0104
11214	0.192	0.235	AMBTC	W1P6Q1	W1NH52	0.863	0.8262	0.043	-0.0368
11214	0.304	0.453	AMBTC	W1PA71	U5CMF5	0.849	0.861	0.149	0.012
11214	0.204	0.216	AMBTC	U5DC62	W1Q0Y8	0.8088	0.8152	0.012	0.0064
11214	0.066	0.091	AMBTC	W1PMA7	U5D4I4	0.9204	0.9338	0.025	0.0134
11214	0.057	0.175	AMBTC	U5D4I4	W1NL88	0.918	0.9271	0.118	0.0091
11214	0.077	0.14	AMBTC	W1PMA7	W1NWU9	0.904	0.907	0.063	0.003
11214	0.077	0.09	AMBTC	W1PMA7	W1P306	0.9389	0.907	0.013	-0.0319
11214	0.331	0.423	AMBTC	W1PHW7	U5CV58	0.8839	0.8729	0.092	-0.011
11220	0.395	0.666	AMBTC	W1P437	U5CW10	0.7542	0.8368	0.271	0.0826
11227	0.116	0.162	AMBTC	W1P9C0	U5D3J6	0.8658	0.8322	0.046	-0.0336
11239	0.876	1.249	AMBTC	W1NY17	W1NUM1	0.5443	0.7374	0.373	0.1931
11239	0.876	0.948	AMBTC	W1NY17	U5DAJ6	0.7111	0.7425	0.072	0.0314
11246	0.086	0.098	AMBTC	W1NGL3	W1NL76	0.9303	0.9358	0.012	0.0055
11255	0.563	0.623	AMBTC	W1NS86	W1PJE9	0.6725	0.688	0.06	0.0155
11255	0.499	0.591	AMBTC	W1PJE9	W1P7G1	0.744	0.6654	0.092	-0.0786
11255	0.257	0.278	AMBTC	W1NS86	U5DFF5	0.853	0.7941	0.021	-0.0589
11260	0.34	0.452	AMBTC	W1NVG0	W1NQ43	0.8207	0.7894	0.112	-0.0313
11260	0.34	0.414	AMBTC	W1NVG0	W1PUT4	0.8365	0.7894	0.074	-0.0471
11260	0.34	0.519	AMBTC	W1NVG0	W1NWG6	0.8021	0.7894	0.179	-0.0127
11260	0.34	0.404	AMBTC	W1NVG0	W1NM19	0.8197	0.7894	0.064	-0.0303
11260	0.413	0.734	AMBTC	W1NM19	U5CM34	0.751	0.7708	0.321	0.0198
11260	0.413	0.854	AMBTC	W1NM19	W1NH15	0.5168	0.7708	0.441	0.254
11260	0.413	0.712	AMBTC	W1NM19	W1NG46	0.6781	0.7708	0.299	0.0927
11260	0.413	0.445	AMBTC	W1NM19	W1NMP7	0.7661	0.7708	0.032	0.0047
11260	0.413	0.429	AMBTC	W1NM19	W1PS01	0.7665	0.7708	0.016	0.0043
11260	0.413	0.445	AMBTC	W1NM19	W1PLC7	0.7715	0.7708	0.032	-0.0007
11260	0.413	0.479	AMBTC	W1NM19	W1PLD6	0.7507	0.7708	0.066	0.0201
11260	0.413	0.757	AMBTC	W1NM19	U5CMC3	0.683	0.7708	0.344	0.0878
11260	0.413	0.757	AMBTC	W1NM19	W1NGX7	0.7117	0.7708	0.344	0.0591
11260	0.413	0.829	AMBTC	W1NM19	W1NF75	0.5358	0.7708	0.416	0.235
11260	0.413	0.757	AMBTC	W1NM19	U5CYQ9	0.7443	0.7708	0.344	0.0265
11260	0.413	0.445	AMBTC	W1NM19	W1NLZ6	0.7441	0.7708	0.032	0.0267
11260	0.413	0.413	AMBTC	W1NM19	W1PSI4	0.7124	0.7708	0	0.0584
11260	0.413	0.628	AMBTC	W1NM19	W1NG49	0.7653	0.7708	0.215	0.0055
11260	0.413	0.429	AMBTC	W1NM19	W1PRZ3	0.7466	0.7708	0.016	0.0242
11260	0.367	0.374	AMBTC	W1NVG0	W1NMN3	0.9311	0.9094	0.007	-0.0217
11260	0.367	0.395	AMBTC	W1NVG0	W1NLR0	0.944	0.9254	0.028	-0.0186
11266	0.285	0.307	AMBTC	U5DER1	U5D5D1	0.6934	0.8681	0.022	0.1747
11278	0.059	0.092	AMBTC	W1PFQ2	U5D192	0.988	0.9841	0.033	-0.0039
11349	0.273	0.377	AMBTC	W1P2H2	W1Q0Q8	0.9578	0.963	0.104	0.0052
11349	0.318	0.449	AMBTC	W1P2H2	W1Q081	0.9317	0.9608	0.131	0.0291
11352	0.075	0.084	AMBTC	W1NI23	W1PPJ2	0.9862	0.9969	0.009	0.0107
11353	0.746	0.882	AMBTC	W1PUP3	W1NK85	0.8359	0.8789	0.136	0.043
11353	0.746	1.012	AMBTC	W1PUP3	W1NDW8	0.82	0.8668	0.266	0.0468
11353	0.746	0.777	AMBTC	W1PUP3	W1P8J8	0.8704	0.8913	0.031	0.0209
11353	0.746	0.823	AMBTC	W1PUP3	W1PG16	0.8726	0.8795	0.077	0.0069
11353	0.746	0.979	AMBTC	W1PUP3	W1NFQ8	0.8294	0.8789	0.233	0.0495
11353	0.746	0.786	AMBTC	W1PUP3	W1NTG8	0.8365	0.8795	0.04	0.043
11353	0.046	0.112	AMBTC	W1NK85	W1NKD8	0.9336	0.9758	0.066	0.0422
11353	0.046	0.131	AMBTC	W1NK85	W1NKI4	0.9068	0.947	0.085	0.0402
11359	0.121	0.124	AMBTC	W1PCG3	W1P1C2	0.9404	0.8941	0.003	-0.0463
11362	0.175	0.354	AMBTC	W1PUF0	W1P971	0.8928	0.8182	0.179	-0.0746
11363	0.062	0.068	AMBTC	W1NKZ0	W1P4T0	0.9856	0.9982	0.006	0.0126
11363	0.062	0.077	AMBTC	W1NKZ0	W1P0L2	0.9936	0.9982	0.015	0.0046
11365	0.081	0.101	AMBTC	W1PJ36	W1PKU4	0.9698	0.9645	0.02	-0.0053
11377	0.085	0.483	AMBTC	W1PEL8	U5CZE2	0.7395	0.8341	0.398	0.0946
11377	0.085	0.101	AMBTC	W1PEL8	U5D4S8	0.9587	0.9696	0.016	0.0109
11377	0.085	0.491	AMBTC	W1PEL8	U5CYV9	0.7671	0.8341	0.406	0.067
11406	0.074	0.095	AMBTC	U5DGY2	U5DBW2	0.9885	0.9501	0.021	-0.0384
11413	0.392	0.721	AMBTC	W1NUZ1	U5CY66	0.833	0.6935	0.329	-0.1395
11426	0.024	0.032	AMBTC	W1NIS1	W1PKL8	0.9265	0.8764	0.008	-0.0501
11426	0	0.016	AMBTC	W1NIS1	W1PZ25	0.9844	0.9879	0.016	0.0035
11426	0.016	0.016	AMBTC	W1PKL8	U5D3L5	0.9855	0.9943	0	0.0088
11440	0.364	0.39	AMBTC	U5D0I9	U5D3D9	0.9201	0.8342	0.026	-0.0859
11449	0.109	0.139	AMBTC	W1NIG0	W1NUP4	0.9411	0.9601	0.03	0.019
11452	0.346	0.421	AMBTC	W1Q0D8	W1PQA0	0.826	0.7096	0.075	-0.1164
11452	0.099	0.125	AMBTC	W1PQA0	W1PJS8	0.9134	0.9407	0.026	0.0273
11452	0.27	0.493	AMBTC	W1Q0D8	W1PZ90	0.8894	0.8061	0.223	-0.0833
11453	0.144	0.145	AMBTC	W1P5Y4	W1P6H9	0.9054	0.8648	0.001	-0.0406
11453	0.144	0.224	AMBTC	W1P5Y4	U5D1S0	0.8679	0.8648	0.08	-0.0031
11465	0.114	0.159	AMBTC	W1NKX7	W1NLL7	0.9841	0.9542	0.045	-0.0299
11467	0.299	0.839	AMBTC	W1P1G4	W1P0W0	0.731	0.7015	0.54	-0.0295
11467	0.299	0.52	AMBTC	W1P1G4	U5CMT7	0.8153	0.8754	0.221	0.0601
11467	0.299	0.411	AMBTC	W1P1G4	U5D3K3	0.8574	0.8754	0.112	0.018
11472	0.858	0.948	AMBTC	U5D9X9	W1PA87	0.52	0.4349	0.09	-0.0851
11472	0.858	1.216	AMBTC	U5D9X9	W1PQJ6	0.5375	0.4349	0.358	-0.1026
11472	0.858	0.927	AMBTC	U5D9X9	W1NTN6	0.5407	0.4349	0.069	-0.1058
11489	0.114	0.133	AMBTC	W1NFT7	W1PYX2	0.9207	0.9038	0.019	-0.0169
11502	0.005	0.01	AMBTC	U5D275	U5CNL2	1	1	0.005	0
11502	0.005	0.038	AMBTC	U5D275	W1PAQ5	0.9995	0.9988	0.033	-0.0007
11514	0.527	0.542	AMBTC	W1NVY0	W1Q0R8	0.6731	0.6887	0.015	0.0156
11514	0.527	0.601	AMBTC	W1NVY0	W1NNW7	0.6582	0.6887	0.074	0.0305
11514	0.527	0.565	AMBTC	W1NVY0	W1NU90	0.7116	0.6887	0.038	-0.0229
11516	0.06	0.153	AMBTC	U5DCT3	W1P0G3	0.9122	0.9048	0.093	-0.0074
11524	0.188	0.451	AMBTC	U5CR73	W1NZ19	0.9512	0.9744	0.263	0.0232
11524	0.093	0.111	AMBTC	U5CR73	U5DFK6	0.9995	0.9894	0.018	-0.0101
11524	0.093	0.116	AMBTC	U5CR73	U5CPP4	0.9846	0.9957	0.023	0.0111
11527	0.152	0.196	AMBTC	W1PCQ5	W1PA77	0.8773	0.8655	0.044	-0.0118
11527	0.152	0.163	AMBTC	W1PCQ5	W1PAV8	0.9181	0.8793	0.011	-0.0388
11527	0.152	0.219	AMBTC	W1PCQ5	W1PB43	0.8691	0.9025	0.067	0.0334
11527	0.152	0.185	AMBTC	W1PCQ5	W1P4M7	0.898	0.8654	0.033	-0.0326
11527	0.165	0.253	AMBTC	W1NFA8	W1NFU9	0.716	0.7838	0.088	0.0678
11527	0.414	0.456	AMBTC	W1NFA8	W1NYL8	0.6717	0.7471	0.042	0.0754
11527	0.414	0.499	AMBTC	W1NFA8	W1PX51	0.7682	0.7435	0.085	-0.0247
11527	0.656	0.715	AMBTC	W1NFU9	U5DGT4	0.5358	0.8025	0.059	0.2667
11527	0.656	0.717	AMBTC	W1NFU9	U5D569	0.5374	0.8025	0.061	0.2651
11528	0.244	0.434	AMBTC	W1NLW5	W1PSE3	0.8386	0.9428	0.19	0.1042
11528	0.204	0.217	AMBTC	W1PSE3	W1P7C0	0.9214	0.9358	0.013	0.0144
11528	0.028	0.038	AMBTC	W1NLW5	U5D9W5	0.9765	0.9789	0.01	0.0024
11538	0.045	0.258	AMBTC	W1PCT5	W1NVE1	0.888	0.9293	0.213	0.0413
11540	0.313	0.336	AMBTC	W1NG77	U5CVQ6	0.8902	0.9174	0.023	0.0272
11540	0.313	0.346	AMBTC	W1NG77	W1PZT1	0.9264	0.9174	0.033	-0.009
11545	0.046	0.053	AMBTC	U5D410	W1P2E7	0.9848	0.9663	0.007	-0.0185
11550	0.105	0.121	AMBTC	U5DIZ3	U5CU14	0.9562	0.9618	0.016	0.0056
11558	0.163	0.245	AMBTC	U5DCG1	W1PW86	0.8419	0.9053	0.082	0.0634
11558	0.106	0.226	AMBTC	U5DCG1	W1PDY2	0.9281	0.9079	0.12	-0.0202
11564	0.058	0.069	AMBTC	U5D9V4	W1PD82	0.97	0.9441	0.011	-0.0259
11566	0.486	0.653	AMBTC	U5CYX5	W1NTW8	0.807	0.8312	0.167	0.0242
11566	0.1	0.201	AMBTC	W1NTW8	W1PVR2	0.9563	0.9454	0.101	-0.0109
11566	0.1	0.111	AMBTC	W1NTW8	W1PUK2	0.951	0.9454	0.011	-0.0056
11566	0.122	0.16	AMBTC	U5CYX5	W1PHI5	0.9174	0.9272	0.038	0.0098
11586	0.57	0.742	AMBTC	W1P989	W1P940	0.6707	0.6675	0.172	-0.0032
11588	0.046	0.094	AMBTC	W1NFZ1	U5D1H7	0.9772	0.9842	0.048	0.007
11588	0.015	0.028	AMBTC	W1NFZ1	U5D474	0.8967	0.976	0.013	0.0793
11588	0.013	0.016	AMBTC	W1PQX2	U5D348	0.9836	0.9915	0.003	0.0079
11588	0.011	0.018	AMBTC	U5D348	W1P311	0.9856	0.9906	0.007	0.005
11588	0.023	0.039	AMBTC	W1PQX2	W1NIS3	0.9767	0.9915	0.016	0.0148
11588	0.007	0.021	AMBTC	W1NR03	W1NSU8	0.9244	0.9159	0.014	-0.0085
11593	0.1	0.106	AMBTC	W1PCH2	W1PQ98	0.976	0.9693	0.006	-0.0067
11593	0.1	0.113	AMBTC	W1PCH2	W1PQ80	0.9819	0.9693	0.013	-0.0126
11593	0.1	0.119	AMBTC	W1PCH2	W1PPJ3	0.9635	0.9693	0.019	0.0058
11593	0.1	0.106	AMBTC	W1PCH2	W1PQJ2	0.9638	0.9693	0.006	0.0055
11595	0.298	0.3	AMBTC	W1PPQ0	U5CN57	0.8808	0.8059	0.002	-0.0749
11599	0.073	0.163	AMBTC	W1P6L5	W1P0C4	0.7046	0.9541	0.09	0.2495
11599	0.05	0.056	AMBTC	W1NH10	W1P576	0.9721	0.9682	0.006	-0.0039
11599	1.012	1.091	AMBTC	W1P9V8	U5DD87	0.7961	0.8083	0.079	0.0122
11599	1.012	1.17	AMBTC	W1P9V8	W1PX71	0.8436	0.8083	0.158	-0.0353
11599	0.081	0.088	AMBTC	W1P1S2	W1NVB4	0.9793	0.9546	0.007	-0.0247
11606	0.12	0.123	AMBTC	W1P0J9	W1NDU7	0.9934	0.9903	0.003	-0.0031
11607	0.189	0.209	AMBTC	W1PGE1	W1NSD0	0.8949	0.9113	0.02	0.0164
11614	0.28	0.329	AMBTC	W1PAD5	W1P8P3	0.8555	0.8744	0.049	0.0189
11614	0.413	0.424	AMBTC	W1PIZ2	W1PKR7	0.8591	0.8393	0.011	-0.0198
11614	0.255	0.26	AMBTC	W1PKR7	U5D6I9	0.9311	0.8848	0.005	-0.0463
11614	0.321	0.394	AMBTC	W1PLW9	U5D452	0.8937	0.8648	0.073	-0.0289
11618	0.84	1.392	AMBTC	U5D2B5	W1NDX7	0.6307	0.7097	0.552	0.079
11620	0.045	0.06	AMBTC	W1NKZ6	W1PNY1	0.973	0.9613	0.015	-0.0117
11627	0.118	0.123	AMBTC	W1NLZ8	W1PF21	0.9611	0.9712	0.005	0.0101
11627	0.226	0.301	AMBTC	W1PYU5	U5DAC2	0.8819	0.9072	0.075	0.0253
11629	0.164	0.217	AMBTC	W1NL63	W1PB44	0.9303	0.9544	0.053	0.0241
11630	0.66	0.719	AMBTC	U5DIX5	W1PEG8	0.7745	0.7433	0.059	-0.0312
11630	0.66	0.664	AMBTC	U5DIX5	W1PSV0	0.7655	0.7646	0.004	-0.0009
11630	0.66	0.782	AMBTC	U5DIX5	W1NHX4	0.7223	0.75	0.122	0.0277
11630	0.66	0.674	AMBTC	U5DIX5	W1NL82	0.7947	0.7646	0.014	-0.0301
11630	0.66	0.751	AMBTC	U5DIX5	U5D5N4	0.7448	0.7646	0.091	0.0198
11630	0.66	0.667	AMBTC	U5DIX5	W1P0N2	0.7584	0.7646	0.007	0.0062
11638	0.061	0.066	AMBTC	W1NX18	U5DB51	0.9442	0.9414	0.005	-0.0028
11639	0.341	0.794	AMBTC	U5CZT2	U5D5P8	0.634	0.6757	0.453	0.0417
11649	0.345	0.351	AMBTC	W1NRQ5	U5CZ20	0.8553	0.7474	0.006	-0.1079
11652	0.009	0.009	AMBTC	W1PHX6	W1PAF2	0.9872	0.9988	0	0.0116
11654	0.375	0.647	AMBTC	W1PNR4	W1PJY4	0.8268	0.7844	0.272	-0.0424
11654	0.375	0.651	AMBTC	W1PNR4	W1P5H2	0.8416	0.7844	0.276	-0.0572
11654	0.375	0.628	AMBTC	W1PNR4	W1PG78	0.8154	0.7844	0.253	-0.031
11654	0.349	0.437	AMBTC	W1PJY4	W1NRD8	0.8029	0.8239	0.088	0.021
11654	0.349	0.647	AMBTC	W1PJY4	W1NTW0	0.7853	0.8239	0.298	0.0386
11654	0.349	0.529	AMBTC	W1PJY4	W1P1B7	0.7913	0.8239	0.18	0.0326
11654	0.349	0.445	AMBTC	W1PJY4	W1P137	0.8015	0.8239	0.096	0.0224
11654	0.246	0.308	AMBTC	W1P5H2	W1NYB5	0.8903	0.8118	0.062	-0.0785
11654	0.596	0.733	AMBTC	W1PG78	W1PCI7	0.834	0.8406	0.137	0.0066
11654	0.596	0.673	AMBTC	W1PG78	W1PST3	0.8695	0.8785	0.077	0.009
11654	0.481	0.541	AMBTC	W1PCI7	W1NQ37	0.8041	0.8501	0.06	0.046
11654	0.481	0.481	AMBTC	W1PCI7	U5D6R3	0.8642	0.8527	0	-0.0115
11654	0.373	0.586	AMBTC	W1PW07	W1PGI9	0.8857	0.8772	0.213	-0.0085
11654	0.111	0.238	AMBTC	W1PST3	W1PTR8	0.9299	0.8979	0.127	-0.032
11654	0.111	0.247	AMBTC	W1PST3	W1PM48	0.9304	0.8979	0.136	-0.0325
11654	0.145	0.377	AMBTC	W1PNR4	W1NLR8	0.8522	0.7844	0.232	-0.0678
11654	0.177	0.205	AMBTC	U5D9M3	U5CZJ4	0.9395	0.9647	0.028	0.0252
11654	0.177	0.249	AMBTC	U5D9M3	U5CZV0	0.925	0.8137	0.072	-0.1113
11654	0.177	0.238	AMBTC	U5D9M3	U5CZY9	0.9446	0.9417	0.061	-0.0029
11654	0.236	0.521	AMBTC	W1PNR4	W1NQI1	0.8549	0.9413	0.285	0.0864
11654	0.236	0.49	AMBTC	W1PNR4	W1PNI0	0.8117	0.9413	0.254	0.1296
11654	0.236	0.536	AMBTC	W1PNR4	W1PW93	0.8061	0.7844	0.3	-0.0217
11654	0.164	0.227	AMBTC	W1PNI0	U5CZK5	0.8847	0.8167	0.063	-0.068
11654	0.174	0.224	AMBTC	W1PNR4	W1PPR3	0.9639	0.9471	0.05	-0.0168
11655	0.083	0.104	AMBTC	W1PKI0	U5CZU0	0.9601	0.9815	0.021	0.0214
11655	0.109	0.138	AMBTC	W1PFL8	W1NQ45	0.9036	0.966	0.029	0.0624
11661	0.57	0.969	AMBTC	U5D9G6	W1NWL4	0.7421	0.8704	0.399	0.1283
11661	0.031	0.038	AMBTC	W1NWL4	W1PKS6	0.9999	0.9975	0.007	-0.0024
11661	0.395	0.574	AMBTC	U5D9G6	W1NM85	0.8731	0.8704	0.179	-0.0027
11662	0.218	0.377	AMBTC	W1PPU1	W1PNQ1	0.8038	0.8476	0.159	0.0438
11662	0.316	0.345	AMBTC	W1PNQ1	W1PI87	0.8415	0.8802	0.029	0.0387
11662	0.159	0.178	AMBTC	W1PPU1	W1NII8	0.9436	0.9427	0.019	-0.0009
11668	0.097	0.101	AMBTC	W1P294	W1P9L9	0.9826	0.9777	0.004	-0.0049
11668	0.097	0.114	AMBTC	W1P294	W1NI78	0.9282	0.9777	0.017	0.0495
11668	0.076	0.1	AMBTC	W1NI78	W1PPR2	0.9892	0.9059	0.024	-0.0833
11669	0.567	0.94	AMBTC	U5DAQ8	W1NDX9	0.7207	0.7686	0.373	0.0479
11669	0.401	0.434	AMBTC	W1NWT7	W1PZD3	0.8757	0.7463	0.033	-0.1294
11669	0.401	0.472	AMBTC	W1NWT7	W1NNV7	0.8528	0.7471	0.071	-0.1057
11669	0.245	0.386	AMBTC	W1NWT7	W1Q087	0.8423	0.8608	0.141	0.0185
11673	0.055	0.061	AMBTC	U5DE55	W1P9E6	0.9917	0.9957	0.006	0.004
11680	0.148	0.225	AMBTC	W1PQW2	U5DJ90	0.9428	0.91	0.077	-0.0328
11685	0.646	0.705	AMBTC	W1NLE7	W1NKS5	0.8042	0.8037	0.059	-0.0005
11685	0.646	0.66	AMBTC	W1NLE7	W1NLH5	0.7715	0.8037	0.014	0.0322
11685	0.646	0.675	AMBTC	W1NLE7	W1NJV9	0.8148	0.8037	0.029	-0.0111
11685	0.539	0.669	AMBTC	U5D3H3	U5D883	0.7248	0.6766	0.13	-0.0482
11685	0.197	0.332	AMBTC	U5D573	U5D280	0.8269	0.7953	0.135	-0.0316
11685	0.333	0.403	AMBTC	W1PAK0	U5D098	0.7231	0.754	0.07	0.0309
11686	0.365	0.39	AMBTC	W1NF36	W1P045	0.8775	0.894	0.025	0.0165
11686	0.553	0.637	AMBTC	W1P045	W1NU22	0.917	0.9058	0.084	-0.0112
11686	0.553	0.561	AMBTC	W1P045	W1NTU3	0.9246	0.9183	0.008	-0.0063
11686	0.553	0.553	AMBTC	W1P045	W1NZB3	0.9231	0.9183	0	-0.0048
11686	0.315	0.422	AMBTC	W1NF36	W1NFT8	0.8175	0.8468	0.107	0.0293
11689	0.211	0.368	AMBTC	W1NZQ1	W1NVS8	0.8443	0.8703	0.157	0.026
11689	0.255	0.367	AMBTC	W1NVS8	W1PQL9	0.8894	0.8863	0.112	-0.0031
11689	0.255	0.279	AMBTC	W1NVS8	U5CW26	0.8798	0.8962	0.024	0.0164
11699	0.219	0.373	AMBTC	W1PE54	W1P7L1	0.9596	0.9026	0.154	-0.057
11702	0.416	0.513	AMBTC	W1PNW2	W1NUH6	0.6571	0.7102	0.097	0.0531
11706	0.167	0.223	AMBTC	W1NVH1	W1P7S2	0.8812	0.848	0.056	-0.0332
11709	0.309	0.575	AMBTC	W1NGG4	W1NGX9	0.7284	0.6858	0.266	-0.0426
11709	0.219	0.271	AMBTC	W1NGX9	W1PCV3	0.8887	0.8951	0.052	0.0064
11709	0.271	0.346	AMBTC	W1NGX9	W1NFT0	0.8843	0.8951	0.075	0.0108
11709	0.271	0.309	AMBTC	W1NGX9	W1P4R1	0.8921	0.8881	0.038	-0.004
11709	0.271	0.288	AMBTC	W1NGX9	U5D121	0.9151	0.8881	0.017	-0.027
11709	0.318	0.335	AMBTC	W1NFT0	W1NEX4	0.9252	0.9067	0.017	-0.0185
11709	0.127	0.208	AMBTC	W1PCV3	U5DA76	0.9554	0.9622	0.081	0.0068
11709	0.127	0.175	AMBTC	W1PCV3	W1PLC3	0.9572	0.9622	0.048	0.005
11709	0.127	0.151	AMBTC	W1PCV3	W1PJB2	0.9575	0.9622	0.024	0.0047
11709	0.127	0.186	AMBTC	W1PCV3	U5DD45	0.9626	0.9622	0.059	-0.0004
11709	0.127	0.182	AMBTC	W1PCV3	W1PLD4	0.954	0.9622	0.055	0.0082
11709	0.213	0.248	AMBTC	W1P4Q5	W1PMP1	0.8784	0.8629	0.035	-0.0155
11709	0.17	0.264	AMBTC	W1NGG4	W1NFI7	0.9355	0.9389	0.094	0.0034
11710	0.115	0.15	AMBTC	W1P3R6	W1NYZ1	0.9501	0.9481	0.035	-0.002
11712	0.369	0.727	AMBTC	W1P1Z7	W1PEQ2	0.8197	0.7384	0.358	-0.0813
11712	0.051	0.146	AMBTC	W1PH81	W1Q122	0.9819	0.9471	0.095	-0.0348
11715	0.381	0.433	AMBTC	U5D0M9	W1PQ01	0.8809	0.9118	0.052	0.0309
11721	0.089	0.119	AMBTC	W1NQE7	U5D199	0.9588	0.9532	0.03	-0.0056
11722	0.136	0.154	AMBTC	W1PNU8	W1PWL1	0.9929	0.9984	0.018	0.0055
11726	0.024	0.029	AMBTC	W1NS23	W1P8K5	0.9803	0.9964	0.005	0.0161
11727	0.532	0.687	AMBTC	W1PQQ7	U5DG25	0.6407	0.7032	0.155	0.0625
11727	0.175	0.49	AMBTC	W1PQQ7	W1P2T0	0.8551	0.8181	0.315	-0.037
11732	0.378	0.39	AMBTC	W1NIH4	W1PJZ3	0.865	0.8271	0.012	-0.0379
11732	0.26	0.271	AMBTC	W1PSN8	W1NYN6	0.8989	0.8812	0.011	-0.0177
11732	0.36	0.4	AMBTC	W1PSN8	W1PV79	0.9099	0.9254	0.04	0.0155
11732	0.36	0.431	AMBTC	W1PSN8	W1PSP5	0.914	0.9364	0.071	0.0224
11732	0.34	0.416	AMBTC	W1NIH4	W1PHS0	0.7655	0.8359	0.076	0.0704
11732	0.225	0.233	AMBTC	W1PJZ3	W1PLM5	0.8981	0.904	0.008	0.0059
11739	0.114	0.158	AMBTC	W1NVN1	W1PYP5	0.9884	0.9532	0.044	-0.0352
11740	0.09	0.201	AMBTC	W1NTX4	W1P960	0.941	0.9355	0.111	-0.0055
11743	0.374	0.457	AMBTC	W1P9X3	W1PJM2	0.9669	0.9586	0.083	-0.0083
11743	0.374	0.394	AMBTC	W1P9X3	W1NYT6	0.9646	0.9586	0.02	-0.006
11743	0.28	0.374	AMBTC	W1P9X3	W1NE21	0.9546	0.9038	0.094	-0.0508
11746	0.143	0.34	AMBTC	U5DBV9	W1P041	0.8049	0.7212	0.197	-0.0837
11746	0.286	0.453	AMBTC	U5DBV9	W1NLC7	0.8234	0.7171	0.167	-0.1063
11753	0.046	0.395	AMBTC	W1P8W1	W1PBE4	0.7325	0.9595	0.349	0.227
11753	0.007	0.262	AMBTC	U5DCC1	W1NYB3	0.8117	0.926	0.255	0.1143
11757	0.52	0.654	AMBTC	U5CWI5	W1PQB4	0.8286	0.7517	0.134	-0.0769
11757	0.186	0.198	AMBTC	W1PQB4	W1PR15	0.9738	0.9347	0.012	-0.0391
11758	0.122	0.548	AMBTC	W1PSF0	U5CZL6	0.9288	0.9746	0.426	0.0458
11758	0.033	0.033	AMBTC	W1PSF0	W1NEL6	0.9997	0.99	0	-0.0097
11759	0.045	0.057	AMBTC	Q70XX6	W1NKW6	0.9949	0.9868	0.012	-0.0081
11759	0.045	0.045	AMBTC	Q70XX6	U5CL94	0.9848	0.9265	0	-0.0583
11761	0.053	0.108	AMBTC	W1NJZ6	Q70XX4	0.9802	1	0.055	0.0198
11771	0.42	0.447	AMBTC	W1Q0W6	U5DD53	0.6429	0.626	0.027	-0.0169
11771	0.294	0.299	AMBTC	W1PUA6	W1PUB1	0.913	0.9154	0.005	0.0024
11772	0.132	0.14	AMBTC	W1NJF2	W1PDZ5	0.9409	0.962	0.008	0.0211
11776	0.186	0.187	AMBTC	W1P4H9	W1NES7	0.8109	0.9482	0.001	0.1373
11780	0.026	0.029	AMBTC	W1NGA0	W1NZX4	0.9778	0.9865	0.003	0.0087
11782	0.513	0.596	AMBTC	W1NGZ8	W1NQ36	0.6395	0.5421	0.083	-0.0974
11787	0.113	0.121	AMBTC	U5D3J5	U5D227	0.9863	0.983	0.008	-0.0033
11800	0.649	0.841	AMBTC	U5CZT5	U5DCR5	0.7269	0.7971	0.192	0.0702
11802	0.384	0.398	AMBTC	W1P1U2	U5D5A9	0.8395	0.83	0.014	-0.0095
11802	0.214	0.487	AMBTC	U5D2U3	W1NQD3	0.8839	0.9187	0.273	0.0348
11802	0.257	0.397	AMBTC	W1PIW4	W1PGF2	0.8641	0.89	0.14	0.0259
11802	0.257	0.315	AMBTC	W1PIW4	W1PVV3	0.8408	0.8982	0.058	0.0574
11802	0.369	0.486	AMBTC	W1PK78	W1PHG1	0.8455	0.7639	0.117	-0.0816
11802	0.369	0.61	AMBTC	W1PK78	W1PGK2	0.8074	0.8468	0.241	0.0394
11802	0.369	0.515	AMBTC	W1PK78	W1P8S9	0.8018	0.7639	0.146	-0.0379
11802	0.369	0.425	AMBTC	W1PK78	W1PQD4	0.8313	0.8468	0.056	0.0155
11802	0.369	0.479	AMBTC	W1PK78	W1P642	0.8271	0.8468	0.11	0.0197
11802	0.369	0.409	AMBTC	W1PK78	W1NPB9	0.7977	0.8468	0.04	0.0491
11802	0.369	0.423	AMBTC	W1PK78	U5CX91	0.7861	0.8468	0.054	0.0607
11802	0.232	0.298	AMBTC	U5CZY8	W1P129	0.8969	0.887	0.066	-0.0099
11802	0.214	0.28	AMBTC	U5CX91	U5CN25	0.9154	0.7765	0.066	-0.1389
11808	0.36	0.546	AMBTC	W1PL61	U5D4T7	0.7584	0.7502	0.186	-0.0082
11811	0.18	0.181	AMBTC	U5D8X3	U5D9M0	0.9724	0.9918	0.001	0.0194
11811	0.11	0.119	AMBTC	U5D8X3	W1PU23	0.9629	0.9658	0.009	0.0029
11814	0.419	0.557	AMBTC	W1P7T0	W1NFH8	0.8257	0.8341	0.138	0.0084
11814	0.318	0.497	AMBTC	W1NFH8	W1NEP5	0.8849	0.8974	0.179	0.0125
11814	0.318	0.463	AMBTC	W1NFH8	W1PE78	0.9331	0.8974	0.145	-0.0357
11814	0.318	0.36	AMBTC	W1NFH8	W1NFY0	0.9527	0.8974	0.042	-0.0553
11814	0.318	0.335	AMBTC	W1NFH8	W1P1N7	0.9468	0.8974	0.017	-0.0494
11814	0.318	0.374	AMBTC	W1NFH8	W1PE83	0.9434	0.8974	0.056	-0.046
11817	0.496	0.668	AMBTC	W1PR98	W1PTA9	0.794	0.8538	0.172	0.0598
11817	0.12	0.213	AMBTC	W1PTA9	U5DHI4	0.9417	0.9179	0.093	-0.0238
11817	0.147	0.158	AMBTC	W1PPZ6	W1PBP5	0.9671	0.9026	0.011	-0.0645
11817	0.185	0.368	AMBTC	W1NV14	U5CVS3	0.8506	0.9311	0.183	0.0805
11817	0.095	0.137	AMBTC	W1PR98	W1NNF7	0.9665	0.97	0.042	0.0035
11822	0.075	0.118	AMBTC	U5DCQ0	W1P6Z2	0.9776	0.9791	0.043	0.0015
11830	0.068	0.068	AMBTC	W1PR86	W1P1P4	0.9706	0.9756	0	0.005
11831	0.712	1.169	AMBTC	W1NG07	U5DF89	0.7402	0.8317	0.457	0.0915
11835	0.507	0.509	AMBTC	W1NLC5	W1PY37	0.7804	0.7508	0.002	-0.0296
11839	0.364	0.406	AMBTC	W1P0V6	U5D129	0.8045	0.9047	0.042	0.1002
11843	0.135	0.168	AMBTC	W1NQR3	W1PJ14	0.9031	0.7819	0.033	-0.1212
11845	0.243	0.279	AMBTC	W1PJ53	W1PF78	0.8078	0.9238	0.036	0.116
11847	0.025	0.035	AMBTC	W1P0N0	W1NXY7	0.9888	0.9997	0.01	0.0109
11847	0.025	0.035	AMBTC	W1P0N0	W1NSV2	0.9999	1	0.01	0.0001
11850	0.097	0.179	AMBTC	W1PT02	W1NL03	0.8677	0.807	0.082	-0.0607
11850	0.282	0.346	AMBTC	W1PKD2	W1P515	0.7758	0.7289	0.064	-0.0469
11850	0.282	0.326	AMBTC	W1PKD2	W1P2I3	0.7586	0.7289	0.044	-0.0297
11850	0.282	0.319	AMBTC	W1PKD2	W1NR95	0.7899	0.7289	0.037	-0.061
11850	0.173	0.285	AMBTC	U5D0Z5	W1NKY8	0.7758	0.7593	0.112	-0.0165
11850	0.173	0.307	AMBTC	U5D0Z5	W1NI56	0.7714	0.7593	0.134	-0.0121
11850	0.173	0.179	AMBTC	U5D0Z5	W1P0U2	0.8086	0.7593	0.006	-0.0493
11850	0.173	0.34	AMBTC	U5D0Z5	W1PW03	0.7639	0.7593	0.167	-0.0046
11850	0.173	0.305	AMBTC	U5D0Z5	U5D5A0	0.8318	0.7593	0.132	-0.0725
11851	0.209	0.229	AMBTC	U5D1S3	U5CZ12	0.9124	0.9654	0.02	0.053
11851	0.302	0.395	AMBTC	W1NS84	U5D2G9	0.9169	0.8882	0.093	-0.0287
11863	0.272	0.429	AMBTC	U5DBX7	W1PHL5	0.9271	0.8544	0.157	-0.0727
11863	0.217	0.246	AMBTC	U5DBX7	U5DBX3	0.9382	0.9329	0.029	-0.0053
11863	0.217	0.217	AMBTC	U5DBX7	U5D8Y4	0.8346	0.6537	0	-0.1809
11871	0.174	0.264	AMBTC	U5D243	W1NYQ2	0.8733	0.871	0.09	-0.0023
11871	0.052	0.104	AMBTC	U5D243	W1PQ04	0.9125	0.9491	0.052	0.0366
11875	0.204	0.211	AMBTC	W1NWK0	W1NG31	0.8953	0.8904	0.007	-0.0049
11875	0.126	0.143	AMBTC	W1NE22	W1P0V2	0.9022	0.8395	0.017	-0.0627
11877	0.326	0.35	AMBTC	W1NXZ8	U5D7K1	0.9029	0.9108	0.024	0.0079
11877	0.159	0.422	AMBTC	U5D0H5	W1NT79	0.5083	0.6932	0.263	0.1849
11877	0.159	0.393	AMBTC	U5D0H5	W1NZ07	0.5834	0.6932	0.234	0.1098
11885	0.02	0.056	AMBTC	U5DAN3	W1NRW1	0.997	0.999	0.036	0.002
11886	0.424	0.465	AMBTC	W1NV92	W1P7D4	0.6173	0.9404	0.041	0.3231
11886	0.131	0.386	AMBTC	W1NG56	W1PHL8	0.845	0.8317	0.255	-0.0133
11895	0.357	0.403	AMBTC	W1PLG2	U5DCI1	0.8734	0.7502	0.046	-0.1232
11902	0.173	0.229	AMBTC	W1PYC8	U5CU29	0.9339	0.7724	0.056	-0.1615
11902	0.052	0.055	AMBTC	U5CU29	W1PE11	0.9533	0.9936	0.003	0.0403
11903	0.281	0.302	AMBTC	W1NXW2	W1NSE1	0.8623	0.8724	0.021	0.0101
11909	0.175	0.399	AMBTC	U5CZD6	U5DEG4	0.8979	0.9037	0.224	0.0058
11909	0.046	0.118	AMBTC	U5CPN8	W1P7J9	0.943	0.9127	0.072	-0.0303
11909	0.046	0.07	AMBTC	U5CPN8	W1PTW2	0.9335	0.9127	0.024	-0.0208
11909	0.058	0.13	AMBTC	U5CZD6	W1NU04	0.9436	0.9392	0.072	-0.0044
11913	0.198	0.227	AMBTC	W1PBF8	W1PKX5	0.9499	0.9682	0.029	0.0183
11913	0.25	0.265	AMBTC	W1PBF8	W1PKV8	0.9737	0.9682	0.015	-0.0055
11913	0.136	0.145	AMBTC	W1PBF8	W1P4H1	0.9959	0.9719	0.009	-0.024
11926	0.542	0.604	AMBTC	W1NFN9	U5CXN6	0.8305	0.8177	0.062	-0.0128
11926	0.542	0.548	AMBTC	W1NFN9	W1NFL7	0.8242	0.8076	0.006	-0.0166
11926	0.542	0.611	AMBTC	W1NFN9	U5D2S8	0.8145	0.8233	0.069	0.0088
11926	0.542	0.555	AMBTC	W1NFN9	W1PLB6	0.8444	0.8014	0.013	-0.043
11926	0.542	0.542	AMBTC	W1NFN9	U5D817	0.8314	0.8014	0	-0.03
11926	0.509	0.531	AMBTC	W1PE57	U5DBW3	0.8075	0.8194	0.022	0.0119
11926	0.382	0.513	AMBTC	U5DFQ6	W1PLP3	0.7934	0.8342	0.131	0.0408
11926	0.382	0.47	AMBTC	U5DFQ6	U5DI88	0.8434	0.8699	0.088	0.0265
11926	0.382	0.437	AMBTC	U5DFQ6	U5DCP2	0.8404	0.8474	0.055	0.007
11926	0.382	0.479	AMBTC	U5DFQ6	U5DDJ3	0.8248	0.8474	0.097	0.0226
11926	0.382	0.437	AMBTC	U5DFQ6	U5DI97	0.8166	0.8474	0.055	0.0308
11926	0.382	0.462	AMBTC	U5DFQ6	U5DDK2	0.8377	0.8474	0.08	0.0097
11926	0.382	0.513	AMBTC	U5DFQ6	U5CUG8	0.8227	0.8474	0.131	0.0247
11926	0.382	0.615	AMBTC	U5DFQ6	U5D531	0.7652	0.8298	0.233	0.0646
11926	0.382	0.445	AMBTC	U5DFQ6	U5DFQ3	0.8229	0.8474	0.063	0.0245
11926	0.382	0.513	AMBTC	U5DFQ6	U5DI92	0.8108	0.8607	0.131	0.0499
11926	0.382	0.522	AMBTC	U5DFQ6	U5D3V6	0.8146	0.8474	0.14	0.0328
11926	0.382	0.39	AMBTC	U5DFQ6	U5DCN3	0.8418	0.8474	0.008	0.0056
11926	0.39	0.408	AMBTC	U5CUN6	W1PX60	0.6778	0.7536	0.018	0.0758
11926	0.39	0.391	AMBTC	U5CUN6	U5CNG3	0.6819	0.7536	0.001	0.0717
11926	0.479	0.558	AMBTC	W1PX56	W1PV81	0.7258	0.7866	0.079	0.0608
11926	0.479	0.502	AMBTC	W1PX56	W1PVY0	0.8612	0.8105	0.023	-0.0507
11926	0.479	0.635	AMBTC	W1PX56	W1PW70	0.6807	0.7822	0.156	0.1015
11937	0.023	0.196	AMBTC	U5D6L2	W1NVU4	0.9695	0.9645	0.173	-0.005
11937	0.023	0.034	AMBTC	U5D6L2	U5D6Q9	0.9944	0.9941	0.011	-0.0003
11937	0	0.004	AMBTC	U5D6L2	W1PJM6	0.9938	0.9926	0.004	-0.0012
11945	0.753	0.772	AMBTC	W1NL13	W1NT98	0.7312	0.7186	0.019	-0.0126
11945	0.753	0.854	AMBTC	W1NL13	W1PIS8	0.7259	0.6627	0.101	-0.0632
11945	0.753	0.828	AMBTC	W1NL13	Q5D725	0.7	0.7186	0.075	0.0186
11945	0.753	0.924	AMBTC	W1NL13	W1PXS0	0.7271	0.7186	0.171	-0.0085
11945	0.721	0.836	AMBTC	W1NQY5	W1NM60	0.6347	0.7419	0.115	0.1072
11952	0.33	0.428	AMBTC	U5D0X9	W1NYX2	0.5567	0.6879	0.098	0.1312
11953	0.805	1.089	AMBTC	W1PKV6	U5D122	0.7409	0.7669	0.284	0.026
11960	0.23	0.231	AMBTC	U5CXZ1	U5D018	0.6863	0.7986	0.001	0.1123
11964	0.041	0.05	AMBTC	U5D2Y2	W1P238	0.9937	0.9929	0.009	-0.0008
11972	0.162	0.237	AMBTC	W1P7B1	W1NIQ4	0.8681	0.8688	0.075	0.0007
11972	0.162	0.226	AMBTC	W1P7B1	W1PEN5	0.8624	0.8688	0.064	0.0064
11972	0.162	0.2	AMBTC	W1P7B1	W1P925	0.8524	0.8688	0.038	0.0164
11972	0.162	0.315	AMBTC	W1P7B1	W1PFH7	0.8872	0.8194	0.153	-0.0678
11972	0.165	0.202	AMBTC	W1NIQ4	U5DF75	0.9077	0.8843	0.037	-0.0234
11977	0.471	0.559	AMBTC	W1PXT4	W1PNY7	0.8298	0.7945	0.088	-0.0353
11977	0.471	0.476	AMBTC	W1PXT4	W1PJV7	0.8465	0.7946	0.005	-0.0519
11985	0.186	0.324	AMBTC	W1PQY1	W1NIE1	0.9107	0.8526	0.138	-0.0581
11993	0.054	0.084	AMBTC	Q70XV8	W1NR53	0.7842	0.7728	0.03	-0.0114
11994	0.013	0.019	AMBTC	W1PBP8	W1PXF8	0.9928	0.9847	0.006	-0.0081
11995	0.022	0.029	AMBTC	W1P5D9	Q70XZ9	0.9271	0.9084	0.007	-0.0187
11995	0.022	0.162	AMBTC	W1P5D9	W1NY20	0.8472	0.8919	0.14	0.0447
11995	0.101	0.101	AMBTC	W1NL92	U5D3A3	0.9134	0.978	0	0.0646
11999	0.179	0.299	AMBTC	U5D096	W1NVB5	0.9433	0.9556	0.12	0.0123
11999	0.269	0.465	AMBTC	W1NVB5	W1PSS2	0.9193	0.9165	0.196	-0.0028
11999	0.269	0.269	AMBTC	W1NVB5	W1NV50	0.9559	0.9543	0	-0.0016
12000	0.21	0.219	AMBTC	U5CYX6	W1P0Q1	0.851	0.6866	0.009	-0.1644
12000	0.383	0.383	AMBTC	W1P0Q1	W1P0Y4	0.9397	0.8633	0	-0.0764
12050	0.34	0.42	AMBTC	W1PZM1	U5D4N1	0.8247	0.8597	0.08	0.035
12058	0.325	0.666	AMBTC	W1PD86	U5D8Z7	0.7563	0.7249	0.341	-0.0314
12058	0.173	0.177	AMBTC	W1PD86	U5DDE3	0.9529	0.9471	0.004	-0.0058
12064	0.153	0.181	AMBTC	W1NFC9	U5D7S4	0.8745	0.9081	0.028	0.0336
12081	0.292	0.338	AMBTC	U5D432	W1NTM7	0.8361	0.853	0.046	0.0169
12096	0.09	0.101	AMBTC	U5D237	U5D416	0.9284	0.8926	0.011	-0.0358
12121	0.353	0.393	AMBTC	W1PGZ8	U5CT09	0.8236	0.7023	0.04	-0.1213
12124	0.906	0.909	AMBTC	W1NEK2	U5D4J8	0.6398	0.5558	0.003	-0.084
12126	0.415	0.511	AMBTC	W1PDS2	U5CZE8	0.7625	0.7494	0.096	-0.0131
12131	0.371	0.414	AMBTC	U5DI10	W1PYG0	0.8607	0.8772	0.043	0.0165
12136	0.684	0.687	AMBTC	W1PRA0	W1PK29	0.6018	0.4583	0.003	-0.1435
12136	0.684	0.72	AMBTC	W1PRA0	U5D2P2	0.5667	0.5885	0.036	0.0218
12136	0.393	0.518	AMBTC	W1PRA0	W1PBX9	0.7883	0.4583	0.125	-0.33
12146	0.103	0.11	AMBTC	W1PFE4	W1NME5	0.962	0.8819	0.007	-0.0801
12151	0.232	0.538	AMBTC	U5DAW4	W1NG64	0.9408	0.8868	0.306	-0.054
12161	0.208	0.457	AMBTC	W1NGN0	W1NNU1	0.7662	0.8097	0.249	0.0435
12161	0.378	0.392	AMBTC	W1NGN0	W1P8F9	0.9405	0.865	0.014	-0.0755
12161	0.378	0.428	AMBTC	W1NGN0	U5CZN9	0.8955	0.7961	0.05	-0.0994
12169	0.642	0.71	AMBTC	W1NT27	W1PJ16	0.7185	0.662	0.068	-0.0565
12174	0.112	0.181	AMBTC	W1NHM0	W1PPD4	0.8736	0.7399	0.069	-0.1337
12176	0.205	0.293	AMBTC	W1P2S2	W1NI99	0.883	0.8434	0.088	-0.0396
12192	0.285	0.403	AMBTC	U5D9M6	W1PCB3	0.7727	0.8447	0.118	0.072
12203	0.235	0.327	AMBTC	W1PQ25	W1PAR3	0.874	0.7722	0.092	-0.1018
12203	0.421	0.608	AMBTC	W1PQ25	U5CP57	0.8657	0.8215	0.187	-0.0442
12210	0.109	0.188	AMBTC	W1PRQ2	W1NZW4	0.8712	0.8202	0.079	-0.051
12210	0.108	0.116	AMBTC	W1P4R7	W1NLE5	0.8895	0.8832	0.008	-0.0063
12210	0.439	0.586	AMBTC	W1PH97	W1PFL1	0.8799	0.7793	0.147	-0.1006
12224	0.208	0.215	AMBTC	W1NVG2	W1Q027	0.914	0.9414	0.007	0.0274
12265	0.705	0.8	AMBTC	W1NPV0	W1PHA7	0.6114	0.5874	0.095	-0.024
12265	0.264	0.352	AMBTC	W1PHA7	W1NGU4	0.7713	0.7462	0.088	-0.0251
12266	0.271	0.322	AMBTC	W1PUD5	W1NDX1	0.7977	0.6925	0.051	-0.1052
12276	0.292	0.342	AMBTC	U5CPX1	W1PMK4	0.8658	0.8182	0.05	-0.0476
12277	0.31	0.413	AMBTC	W1PUI9	W1PK86	0.6558	0.6279	0.103	-0.0279
12277	0.108	0.143	AMBTC	W1PUI9	U5D5U6	0.904	0.9333	0.035	0.0293
12277	0.078	0.101	AMBTC	W1PUI9	W1PDR8	0.8992	0.8977	0.023	-0.0015
12280	0.07	0.178	AMBTC	W1P623	W1NXS0	0.8348	0.7873	0.108	-0.0475
12297	0.076	0.386	AMBTC	W1NW76	W1NMU6	0.7159	0.7134	0.31	-0.0025
12297	0.076	0.346	AMBTC	W1NW76	W1PYA8	0.7372	0.6648	0.27	-0.0724
12299	0.338	0.482	AMBTC	U5D1H8	W1PJ57	0.7363	0.6656	0.144	-0.0707
12299	0.298	0.36	AMBTC	U5D1H8	W1NZY8	0.7964	0.8374	0.062	0.041
12300	0.447	0.482	AMBTC	U5CW50	W1PMS4	0.7263	0.5453	0.035	-0.181
12300	0.635	0.717	AMBTC	W1PMS4	W1PF23	0.7086	0.8056	0.082	0.097
12300	0.145	0.276	AMBTC	W1PMS4	U5D436	0.8235	0.9006	0.131	0.0771
12300	0.145	0.157	AMBTC	W1PMS4	W1NUP2	0.8468	0.8953	0.012	0.0485
12300	0.345	0.382	AMBTC	W1PF23	W1Q0U9	0.8841	0.7824	0.037	-0.1017
12300	0.345	0.393	AMBTC	W1PF23	W1NG12	0.8176	0.7824	0.048	-0.0352
12304	0.369	0.432	AMBTC	U5DD96	W1PXT6	0.9046	0.7819	0.063	-0.1227
12317	0.388	0.469	AMBTC	W1PUY1	W1NY37	0.8822	0.943	0.081	0.0608
12320	0.474	0.631	AMBTC	W1NGA7	W1PG89	0.7311	0.7428	0.157	0.0117
12320	0.475	0.497	AMBTC	W1NGA7	U5CW67	0.8792	0.7841	0.022	-0.0951
12321	0.121	0.23	AMBTC	W1NS15	W1PCA5	0.9031	0.8907	0.109	-0.0124
12321	0.121	0.125	AMBTC	W1NS15	W1PMF2	0.8928	0.9038	0.004	0.011
12323	0.235	0.349	AMBTC	W1PIB7	W1PFY4	0.7186	0.7422	0.114	0.0236
12323	0.235	0.245	AMBTC	W1PIB7	W1P2H7	0.8566	0.8263	0.01	-0.0303
12329	0.342	0.471	AMBTC	W1PBL5	W1NV55	0.8355	0.7838	0.129	-0.0517
12329	0.342	0.458	AMBTC	W1PBL5	U5DA30	0.8029	0.7838	0.116	-0.0191
12357	0.195	0.472	AMBTC	U5D4M4	U5DHQ3	0.7733	0.8447	0.277	0.0714
12358	0.694	0.732	AMBTC	W1P8Z6	W1PZ16	0.6503	0.6033	0.038	-0.047
12377	0.225	0.344	AMBTC	U5D2D0	U5D7S9	0.7915	0.9233	0.119	0.1318
12378	0.276	0.302	AMBTC	W1NY72	U5DB14	0.803	0.7639	0.026	-0.0391
12378	0.19	0.279	AMBTC	U5DB14	W1P195	0.7969	0.8261	0.089	0.0292
12378	0.192	0.224	AMBTC	W1NY72	U5CPW2	0.8359	0.8479	0.032	0.012
12396	0.359	0.375	AMBTC	W1PX67	W1PQY0	0.7993	0.7355	0.016	-0.0638
12399	0.134	0.143	AMBTC	W1P0H9	W1P0Q7	0.8967	0.9114	0.009	0.0147
12411	0.099	0.099	AMBTC	W1PV31	W1PUR8	0.9068	0.9284	0	0.0216
12411	0.092	0.15	AMBTC	W1NL21	W1PP61	0.9365	0.8595	0.058	-0.077
12411	0.174	0.375	AMBTC	U5D9T6	W1PTD1	0.8706	0.85	0.201	-0.0206
12411	0.174	0.411	AMBTC	U5D9T6	W1NRE5	0.8691	0.85	0.237	-0.0191
12411	0.174	0.274	AMBTC	U5D9T6	W1Q0E8	0.8948	0.9409	0.1	0.0461
12411	0.174	0.435	AMBTC	U5D9T6	W1NHB4	0.8694	0.85	0.261	-0.0194
12411	0.174	0.317	AMBTC	U5D9T6	W1PVD5	0.8827	0.7967	0.143	-0.086
12411	0.174	0.213	AMBTC	U5D9T6	U5DCW1	0.9033	0.9409	0.039	0.0376
12411	0.174	0.223	AMBTC	U5D9T6	U5D0W1	0.8722	0.9409	0.049	0.0687
12411	0.174	0.423	AMBTC	U5D9T6	W1NPY1	0.7048	0.7512	0.249	0.0464
12411	0.174	0.363	AMBTC	U5D9T6	W1P145	0.9233	0.8155	0.189	-0.1078
12411	0.174	0.448	AMBTC	U5D9T6	W1NNU6	0.8777	0.85	0.274	-0.0277
12411	0.174	0.223	AMBTC	U5D9T6	U5DFQ8	0.8802	0.9409	0.049	0.0607
12411	0.193	0.215	AMBTC	U5D5J0	W1PZA3	0.8894	0.876	0.022	-0.0134
12411	0.193	0.262	AMBTC	U5D5J0	W1P019	0.8736	0.876	0.069	0.0024
12411	0.193	0.264	AMBTC	U5D5J0	W1Q0E9	0.7792	0.876	0.071	0.0968
12411	0.132	0.178	AMBTC	U5D5J0	W1PEL7	0.8863	0.8715	0.046	-0.0148
12419	0.117	0.117	AMBTC	W1P1Z9	W1NF90	0.894	0.9074	0	0.0134
12419	0.288	0.319	AMBTC	W1PYV9	W1PNY3	0.8364	0.7943	0.031	-0.0421
12419	0.251	0.327	AMBTC	W1NGC0	W1PFG7	0.8059	0.7744	0.076	-0.0315
12419	0.251	0.38	AMBTC	W1NGC0	U5CXC8	0.796	0.7744	0.129	-0.0216
12428	0.568	0.608	AMBTC	U5CYK2	W1PFC7	0.6051	0.6225	0.04	0.0174
12428	0.134	0.149	AMBTC	W1PJ89	W1PZW2	0.8216	0.8345	0.015	0.0129
12436	0.461	0.493	AMBTC	U5D2L7	W1PWY7	0.8038	0.639	0.032	-0.1648
12447	0.173	0.381	AMBTC	U5DEI4	U5CVL8	0.7993	0.8266	0.208	0.0273
12447	0.173	0.18	AMBTC	U5DEI4	U5CRA2	0.8595	0.869	0.007	0.0095
12447	0.179	0.394	AMBTC	U5DEI4	U5D4R8	0.7495	0.8266	0.215	0.0771
12460	0.434	0.464	AMBTC	W1NFK2	W1PEX9	0.7441	0.775	0.03	0.0309
12460	0.358	0.484	AMBTC	W1NFK2	W1NUU2	0.7991	0.8023	0.126	0.0032
12482	0.222	0.32	AMBTC	W1PV34	W1PJI9	0.7465	0.6958	0.098	-0.0507
12482	0.26	0.304	AMBTC	W1PJI9	W1NX38	0.766	0.7877	0.044	0.0217
12482	0.229	0.361	AMBTC	W1PJI9	W1PKA6	0.8031	0.827	0.132	0.0239
12483	0.221	0.424	AMBTC	W1PTZ8	W1PW78	0.6766	0.7602	0.203	0.0836
12483	0.496	0.636	AMBTC	W1PW78	W1PX64	0.7176	0.7218	0.14	0.0042
12506	0.395	0.49	AMBTC	W1PQQ6	U5D978	0.7778	0.8395	0.095	0.0617
12506	0.395	0.459	AMBTC	W1PQQ6	W1PZX5	0.7634	0.8395	0.064	0.0761
12537	0.433	0.637	AMBTC	W1NJG1	W1NDV7	0.8237	0.8488	0.204	0.0251
12537	0.173	0.228	AMBTC	W1NGB1	W1PYD1	0.9395	0.8266	0.055	-0.1129
12537	0.173	0.188	AMBTC	W1NGB1	W1PIY2	0.9441	0.8172	0.015	-0.1269
12542	0.335	0.659	AMBTC	U5CSC4	W1PHH8	0.7516	0.7662	0.324	0.0146
12542	0.335	0.457	AMBTC	U5CSC4	W1NW13	0.8023	0.7746	0.122	-0.0277
12542	0.485	0.575	AMBTC	W1NW13	W1PIG8	0.7955	0.788	0.09	-0.0075
12542	0.485	0.557	AMBTC	W1NW13	W1PMJ7	0.7719	0.788	0.072	0.0161
12542	0.485	0.497	AMBTC	W1NW13	W1PQ65	0.8217	0.8121	0.012	-0.0096
12542	0.485	0.734	AMBTC	W1NW13	W1PWG9	0.7523	0.788	0.249	0.0357
12542	0.485	0.508	AMBTC	W1NW13	W1NJ63	0.805	0.788	0.023	-0.017
12547	0.157	0.497	AMBTC	W1NZZ3	W1P9Y1	0.7479	0.6998	0.34	-0.0481
12548	0.176	0.176	AMBTC	W1PRZ4	W1P928	0.8896	0.864	0	-0.0256
12549	0.437	0.651	AMBTC	U5D4J3	W1PNW4	0.8096	0.7195	0.214	-0.0901
12549	0.437	0.445	AMBTC	U5D4J3	W1Q0S2	0.806	0.7647	0.008	-0.0413
12555	0.168	0.447	AMBTC	W1PLB3	W1Q0X4	0.8524	0.8879	0.279	0.0355
12555	0.168	0.503	AMBTC	W1PLB3	W1P554	0.7931	0.8879	0.335	0.0948
12560	0.342	0.355	AMBTC	W1PDZ3	W1P0X7	0.8746	0.7323	0.013	-0.1423
12565	0.161	0.38	AMBTC	W1PQP6	W1P8H8	0.7538	0.8101	0.219	0.0563
12565	0.161	0.396	AMBTC	W1PQP6	W1PUI6	0.7372	0.8101	0.235	0.0729
12565	0.161	0.31	AMBTC	W1PQP6	W1P9P1	0.8155	0.8101	0.149	-0.0054
12565	0.222	0.402	AMBTC	W1PQP6	U5DAU6	0.8389	0.7978	0.18	-0.0411
12565	0.222	0.326	AMBTC	W1PQP6	W1NHQ1	0.8155	0.7897	0.104	-0.0258
12570	0.133	0.178	AMBTC	W1PS43	W1P548	0.9164	0.9188	0.045	0.0024
12570	0.102	0.183	AMBTC	W1PS43	W1PS29	0.9842	0.9188	0.081	-0.0654
12585	0.636	0.643	AMBTC	U5D6P6	U5D1V2	0.7841	0.8153	0.007	0.0312
12588	0.283	0.303	AMBTC	U5CYJ9	U5CPZ5	0.9279	0.9369	0.02	0.009
12608	0.289	0.301	AMBTC	U5D7D9	W1NWC4	0.6575	0.6725	0.012	0.015
12608	0.306	0.448	AMBTC	W1NFY4	W1P4P9	0.7626	0.7923	0.142	0.0297
12612	0.125	0.219	AMBTC	W1PIQ5	W1NDK9	0.9483	0.9351	0.094	-0.0132
12620	0.082	0.087	AMBTC	W1PT66	W1PUX5	0.9155	0.8963	0.005	-0.0192
12626	0.203	0.318	AMBTC	W1PZC9	W1P7B3	0.8519	0.8644	0.115	0.0125
12628	0.562	0.584	AMBTC	W1PR00	W1NN25	0.7741	0.7897	0.022	0.0156
12629	0.208	0.262	AMBTC	W1PBY5	W1PEF4	0.7772	0.7768	0.054	-0.0004
12629	0.208	0.287	AMBTC	W1PBY5	W1NJZ9	0.84	0.8583	0.079	0.0183
12632	0.516	0.604	AMBTC	W1P1S1	U5CZP7	0.8372	0.8066	0.088	-0.0306
12632	0.516	0.636	AMBTC	W1P1S1	W1NEA1	0.8383	0.8222	0.12	-0.0161
12632	0.516	0.62	AMBTC	W1P1S1	W1PME3	0.82	0.8066	0.104	-0.0134
12632	0.516	0.545	AMBTC	W1P1S1	W1PJ78	0.8316	0.7316	0.029	-0.1
12634	0.195	0.201	AMBTC	W1PKR1	W1PEI6	0.7111	0.8123	0.006	0.1012
12654	0.249	0.278	AMBTC	U5D9G1	W1NWJ7	0.8595	0.8879	0.029	0.0284
12665	0.1	0.108	AMBTC	W1PJR0	U5DD04	0.9693	0.9624	0.008	-0.0069
12668	0.356	0.519	AMBTC	W1PAZ7	U5DB82	0.6449	0.7435	0.163	0.0986
12687	0.478	0.622	AMBTC	W1PVT5	U5CNQ8	0.7349	0.7789	0.144	0.044
12700	0.123	0.123	AMBTC	W1P6D3	W1NU32	0.9913	0.9805	0	-0.0108
12702	0.381	0.385	AMBTC	U5D3X0	W1NX03	0.8353	0.9168	0.004	0.0815
12725	0.464	0.519	AMBTC	W1PJU0	W1P1I8	0.8299	0.6462	0.055	-0.1837
12725	0.464	0.476	AMBTC	W1PJU0	W1P6C7	0.8451	0.8569	0.012	0.0118
12770	0.506	0.832	AMBTC	W1NQL0	W1NS03	0.7461	0.3646	0.326	-0.3815
12771	0.344	0.462	AMBTC	W1NWD7	W1P0J8	0.8918	0.7772	0.118	-0.1146
12782	0.221	0.329	AMBTC	W1PL43	W1PXM0	0.8625	0.9021	0.108	0.0396
12785	0.047	0.047	AMBTC	W1NUV2	W1PIM2	0.9315	0.871	0	-0.0605
12791	0.112	0.133	AMBTC	U5CP95	U5CYY8	0.8959	0.9009	0.021	0.005
12801	0.29	0.407	AMBTC	W1PG29	W1PHR4	0.8512	0.7927	0.117	-0.0585
12802	0.306	0.585	AMBTC	U5D4F0	W1NLT1	0.6525	0.7284	0.279	0.0759
12802	0.194	0.307	AMBTC	W1NLT1	W1NKM0	0.8659	0.8911	0.113	0.0252
12802	0.227	0.451	AMBTC	W1P9R5	W1PF08	0.751	0.6353	0.224	-0.1157
12802	0.614	0.731	AMBTC	W1PF08	W1PUN3	0.7573	0.7814	0.117	0.0241
12802	0.498	0.527	AMBTC	W1P9R5	U5D7V5	0.7106	0.6842	0.029	-0.0264
12804	0.168	0.55	AMBTC	W1PWR2	W1PAP9	0.8035	0.7756	0.382	-0.0279
12847	0.417	0.425	AMBTC	W1Q0Z1	U5CZJ7	0.8094	0.7756	0.008	-0.0338
12850	0.129	0.139	AMBTC	W1NGP4	U5D872	0.9112	0.923	0.01	0.0118
12872	0.3	0.357	AMBTC	W1PXI1	U5DA95	0.9054	0.925	0.057	0.0196
12882	0.124	0.138	AMBTC	U5D3Y4	W1P6X7	0.9803	0.9568	0.014	-0.0235
12896	0.27	0.375	AMBTC	W1NYY5	W1P5M8	0.7256	0.6953	0.105	-0.0303
12899	0.168	0.323	AMBTC	W1NXZ9	W1PTZ3	0.8134	0.8192	0.155	0.0058
12900	0.135	0.434	AMBTC	W1PVT2	W1NPZ5	0.6438	0.7348	0.299	0.091
12942	0.122	0.519	AMBTC	U5D9F6	U5DEB2	0.7523	0.808	0.397	0.0557
12947	0.21	0.426	AMBTC	W1PHV5	W1PAF8	0.8649	0.7226	0.216	-0.1423
12947	0.3	0.354	AMBTC	W1PAF8	U5CU06	0.8417	0.8675	0.054	0.0258
12953	0.19	0.226	AMBTC	W1NRW3	W1Q0K9	0.7693	0.8101	0.036	0.0408
12956	0.235	0.302	AMBTC	W1NGU2	W1PX80	0.8728	0.8345	0.067	-0.0383
12956	0.16	0.177	AMBTC	U5DCJ0	U5CU92	0.8975	0.9349	0.017	0.0374
12956	0.306	0.592	AMBTC	U5D9Q8	W1P649	0.6787	0.8171	0.286	0.1384
13018	0.453	0.566	AMBTC	U5D2F6	W1NQI7	0.7515	0.6756	0.113	-0.0759
13018	0.201	0.371	AMBTC	U5D2F6	W1PEK1	0.8618	0.8599	0.17	-0.0019
13018	0.196	0.223	AMBTC	W1PEK1	W1PX19	0.9522	0.9702	0.027	0.018
13021	0.091	0.096	AMBTC	U5D3Q1	W1PB82	0.8889	0.9563	0.005	0.0674
13028	0.208	0.5	AMBTC	W1PWF6	W1NF69	0.7225	0.7789	0.292	0.0564
13038	0.344	0.383	AMBTC	W1NHD7	W1PDR0	0.8732	0.8818	0.039	0.0086
13048	0.017	0.04	AMBTC	W1PPG4	W1NR72	0.963	0.9972	0.023	0.0342
13068	0.711	0.896	AMBTC	W1PVV7	W1PUU8	0.508	0.6094	0.185	0.1014
13068	0.711	0.778	AMBTC	W1PVV7	W1NY46	0.6731	0.5914	0.067	-0.0817
13068	0.445	0.545	AMBTC	W1PVV7	W1PWJ1	0.6792	0.5718	0.1	-0.1074
13068	0.555	0.6	AMBTC	W1PPC8	W1PSL3	0.8208	0.8553	0.045	0.0345
13068	0.555	0.631	AMBTC	W1PPC8	W1PHU6	0.7982	0.8109	0.076	0.0127
13068	0.555	0.623	AMBTC	W1PPC8	U5CMF9	0.823	0.839	0.068	0.016
13068	0.343	0.399	AMBTC	W1NFR5	W1PW38	0.799	0.8045	0.056	0.0055
13068	0.703	1.001	AMBTC	U5D736	W1NJB1	0.6127	0.7555	0.298	0.1428
13068	0.703	0.756	AMBTC	U5D736	W1PFK5	0.5855	0.7555	0.053	0.17
13068	0.703	0.736	AMBTC	U5D736	W1NVD9	0.6545	0.7555	0.033	0.101
13087	0.403	0.407	AMBTC	W1NZR1	W1PZL6	0.8493	0.7977	0.004	-0.0516
13097	0.283	0.298	AMBTC	U5D683	W1PK02	0.8389	0.7562	0.015	-0.0827
13131	0.208	0.241	AMBTC	W1PZR6	W1Q0Q0	0.8851	0.9565	0.033	0.0714
13169	0.229	0.442	AMBTC	W1NFN6	W1PE84	0.91	0.8303	0.213	-0.0797
13169	0.229	0.309	AMBTC	W1NFN6	W1NS78	0.8267	0.7918	0.08	-0.0349
13202	0.336	0.336	AMBTC	W1NX74	W1PPK2	0.8942	0.8993	0	0.0051
13208	0.314	0.314	AMBTC	W1NKI2	W1NUM6	0.8312	0.8181	0	-0.0131
13215	0.423	0.521	AMBTC	W1PNM2	W1Q0S0	0.8099	0.8041	0.098	-0.0058
13234	0.335	0.354	AMBTC	W1PLS1	W1PMR4	0.8237	0.8901	0.019	0.0664
13268	0.545	0.564	AMBTC	W1PHM7	W1NX25	0.7207	0.7762	0.019	0.0555
13268	0.355	0.533	AMBTC	W1NX25	W1PNZ1	0.781	0.7611	0.178	-0.0199
13268	0.355	0.376	AMBTC	W1NX25	W1PRJ8	0.7979	0.7595	0.021	-0.0384
13269	0.407	0.417	AMBTC	W1PZU6	W1PKF3	0.7052	0.7778	0.01	0.0726
13286	0.282	0.343	AMBTC	U5D848	W1NID8	0.8589	0.8601	0.061	0.0012
13301	0.081	0.11	AMBTC	U5D002	U5D323	0.8724	0.8964	0.029	0.024
13301	0.081	0.111	AMBTC	U5D002	W1PUL0	0.8935	0.8869	0.03	-0.0066
13301	0.081	0.117	AMBTC	U5D002	W1PBW9	0.8656	0.8964	0.036	0.0308
13301	0.055	0.061	AMBTC	W1NWR2	W1PN60	0.8581	0.8546	0.006	-0.0035
13301	0.055	0.074	AMBTC	W1NWR2	W1NEQ0	0.8759	0.8546	0.019	-0.0213
13301	0.424	0.478	AMBTC	U5D0T7	U5DFN1	0.9066	0.8365	0.054	-0.0701
13301	0.381	0.396	AMBTC	W1PMY2	W1PM01	0.8559	0.8813	0.015	0.0254
13301	0.381	0.463	AMBTC	W1PMY2	W1PKG6	0.8085	0.769	0.082	-0.0395
13301	0.095	0.126	AMBTC	W1NWR2	W1P3T9	0.8645	0.8546	0.031	-0.0099
13301	0.095	0.097	AMBTC	W1NWR2	W1NZS3	0.8981	0.8546	0.002	-0.0435
13301	0.03	0.138	AMBTC	W1P3T9	W1P112	0.9251	0.9219	0.108	-0.0032
13318	0.372	0.462	AMBTC	W1NK61	W1P029	0.8652	0.8923	0.09	0.0271
13318	0.372	0.783	AMBTC	W1NK61	W1PNS3	0.6053	0.8115	0.411	0.2062
13355	0.38	0.397	AMBTC	W1PPH4	W1PNX8	0.9628	0.9346	0.017	-0.0282
13360	0.21	0.28	AMBTC	W1NSQ1	W1NU13	0.8916	0.8538	0.07	-0.0378
13377	0.393	0.401	AMBTC	U5D127	W1PIG7	0.8245	0.8906	0.008	0.0661
13382	0.355	0.376	AMBTC	W1NL27	W1Q0S3	0.7568	0.7859	0.021	0.0291
13439	0.359	0.397	AMBTC	W1PBB5	U5D385	0.8945	0.9302	0.038	0.0357
13509	0.227	0.397	AMBTC	W1PVX1	W1PUT7	0.6905	0.8082	0.17	0.1177
13509	0.136	0.175	AMBTC	W1PUT7	U5CQD1	0.8055	0.7947	0.039	-0.0108
13516	0.124	0.222	AMBTC	W1PL21	U5DEP1	0.9065	0.834	0.098	-0.0725
13520	0.634	0.661	AMBTC	W1NRS2	W1NG02	0.744	0.7575	0.027	0.0135
13533	0.113	0.118	AMBTC	W1P574	W1P8K4	0.9515	0.9713	0.005	0.0198
13547	0.265	0.32	AMBTC	U5D6E0	W1NSF2	0.8505	0.8614	0.055	0.0109
13586	0.441	0.565	AMBTC	W1PMU6	W1NH11	0.8396	0.8112	0.124	-0.0284
13593	0.296	0.298	AMBTC	U5CX09	U5D949	0.9024	0.9077	0.002	0.0053
13678	0.365	0.736	AMBTC	W1NU49	W1NK21	0.8784	0.8716	0.371	-0.0068
13683	0.676	0.69	AMBTC	W1NUP3	W1PE67	0.7246	0.5775	0.014	-0.1471
13683	0.423	0.62	AMBTC	W1NUP3	U5D7G0	0.6185	0.435	0.197	-0.1835
13683	0.423	0.539	AMBTC	W1NUP3	W1NLU5	0.6341	0.5689	0.116	-0.0652
13683	0.506	0.516	AMBTC	U5D7G0	W1NFT3	0.4168	0.7943	0.01	0.3775
13683	0.283	0.287	AMBTC	W1Q127	W1PBW8	0.8124	0.7782	0.004	-0.0342
13683	0.283	0.402	AMBTC	W1Q127	W1PNR8	0.8536	0.7782	0.119	-0.0754
13683	0.199	0.335	AMBTC	W1NUP3	W1PMX6	0.7719	0.7783	0.136	0.0064
13693	1.038	1.191	AMBTC	W1NK89	W1PJL3	0.7595	0.7804	0.153	0.0209
13748	0.279	0.322	AMBTC	U5CMD6	U5CR06	0.8442	0.7607	0.043	-0.0835
13763	0.704	0.886	AMBTC	W1NUC9	U5DES9	0.8331	0.7059	0.182	-0.1272
13778	0.296	0.359	AMBTC	W1PCQ9	U5D5V3	0.9113	0.9226	0.063	0.0113
13778	0.296	0.317	AMBTC	W1PCQ9	U5D3K8	0.7943	0.9226	0.021	0.1283
13778	0.241	0.316	AMBTC	W1PCQ9	W1PQW0	0.9333	0.9111	0.075	-0.0222
13778	0.243	0.309	AMBTC	U5D3K8	W1P3B3	0.8882	0.8063	0.066	-0.0819
13780	0.108	0.128	AMBTC	W1PLF1	W1PP77	0.7966	0.8165	0.02	0.0199
13806	0.234	0.234	AMBTC	W1PP95	W1PCJ5	0.9347	0.8637	0	-0.071
13832	0.13	0.149	AMBTC	W1PNA8	W1NWT1	0.7983	0.7531	0.019	-0.0452
13832	0.205	0.212	AMBTC	W1PH14	W1P3I3	0.8473	0.82	0.007	-0.0273
13832	0.175	0.245	AMBTC	U5D8N5	W1NRU9	0.9051	0.8591	0.07	-0.046
13832	0.162	0.168	AMBTC	U5D8N5	W1PE28	0.8388	0.8824	0.006	0.0436
13832	0.162	0.168	AMBTC	U5D8N5	W1P8D9	0.8428	0.8788	0.006	0.036
13832	0.344	0.415	AMBTC	U5CTV8	W1P4Y6	0.7337	0.7363	0.071	0.0026
13832	0.435	0.529	AMBTC	W1NDT3	W1PXS7	0.6798	0.6882	0.094	0.0084
13832	0.195	0.432	AMBTC	W1NDT3	W1NPR6	0.7244	0.6089	0.237	-0.1155
13832	0.253	0.341	AMBTC	W1NPR6	W1P6G6	0.8012	0.8572	0.088	0.056
13832	0.253	0.262	AMBTC	W1NPR6	U5CV25	0.8163	0.8505	0.009	0.0342
13844	0.436	0.468	AMBTC	U5CMQ2	U5D7T4	0.777	0.7004	0.032	-0.0766
13844	0.466	0.541	AMBTC	W1NH33	W1NLH7	0.8696	0.8341	0.075	-0.0355
13844	0.359	0.37	AMBTC	W1NLH7	W1PNT1	0.9198	0.9128	0.011	-0.007
13848	0.354	0.411	AMBTC	W1NEC1	W1PZ72	0.9463	0.8407	0.057	-0.1056
13848	0.231	0.281	AMBTC	W1NEC1	W1PIH5	0.9287	0.9111	0.05	-0.0176
13848	0.237	0.465	AMBTC	W1NEC1	W1PE29	0.8518	0.9023	0.228	0.0505
13871	0.369	0.387	AMBTC	U5D4F3	W1NXQ1	0.7909	0.7493	0.018	-0.0416
13871	0.35	0.52	AMBTC	W1NXQ1	W1NR79	0.8714	0.8423	0.17	-0.0291
13872	0.435	0.471	AMBTC	W1PQE4	U5D421	0.9064	0.8093	0.036	-0.0971
13878	0.345	0.418	AMBTC	W1NUG7	W1PP63	0.8097	0.7991	0.073	-0.0106
13878	0.345	0.419	AMBTC	W1NUG7	W1PTT2	0.846	0.8289	0.074	-0.0171
13878	0.345	0.361	AMBTC	W1NUG7	W1PC48	0.8701	0.8289	0.016	-0.0412
13878	0.261	0.548	AMBTC	W1PC48	U5D3V5	0.804	0.8104	0.287	0.0064
13878	0.398	0.421	AMBTC	W1NSN4	W1PKS5	0.8511	0.876	0.023	0.0249
13890	0.225	0.37	AMBTC	W1NUW8	W1NIF2	0.8483	0.7772	0.145	-0.0711
13890	0.162	0.186	AMBTC	W1NIF2	U5CPJ6	0.8702	0.8409	0.024	-0.0293
13890	0.222	0.244	AMBTC	U5CZ36	W1PLS2	0.8753	0.8513	0.022	-0.024
13890	0.207	0.289	AMBTC	W1PLS2	W1PLI8	0.9067	0.9005	0.082	-0.0062
13890	0.207	0.241	AMBTC	W1PLS2	W1PN77	0.8659	0.9005	0.034	0.0346
13890	0.09	0.256	AMBTC	W1PH77	W1PHQ0	0.8779	0.8446	0.166	-0.0333
13902	0.146	0.174	AMBTC	W1Q0D2	U5DFY2	0.8445	0.7721	0.028	-0.0724
13902	0.146	0.451	AMBTC	W1Q0D2	W1NWD3	0.9072	0.7987	0.305	-0.1085
13902	0.146	0.165	AMBTC	W1Q0D2	U5D0W9	0.8207	0.7721	0.019	-0.0486
13902	0.146	0.27	AMBTC	W1Q0D2	W1PCM4	0.8577	0.7987	0.124	-0.059
13902	0.146	0.194	AMBTC	W1Q0D2	W1Q0A8	0.857	0.7987	0.048	-0.0583
13902	0.23	0.238	AMBTC	W1NWD3	W1NVI9	0.9736	0.9231	0.008	-0.0505
13902	0.23	0.238	AMBTC	W1NWD3	W1NRL7	0.9696	0.9392	0.008	-0.0304
13935	0.566	0.763	AMBTC	U5D7C2	W1NZY2	0.6468	0.7277	0.197	0.0809
13946	0.864	0.98	AMBTC	U5D9C3	U5D302	0.8382	0.7255	0.116	-0.1127
13980	0.145	0.215	AMBTC	W1NNZ7	U5D0Q6	0.8609	0.8225	0.07	-0.0384
13989	0.735	0.779	AMBTC	W1PK50	W1P6D1	0.6158	0.6772	0.044	0.0614
13989	0.491	0.577	AMBTC	W1P6D1	W1PK55	0.7235	0.8136	0.086	0.0901
14000	0.686	0.707	AMBTC	U5D3W5	W1PP68	0.8105	0.8738	0.021	0.0633
14030	0.803	0.898	AMBTC	W1PUJ6	W1PP57	0.7061	0.82	0.095	0.1139
14068	0.09	0.097	AMBTC	U5D4S3	W1P7A2	0.9645	0.971	0.007	0.0065
14089	0.078	0.129	AMBTC	W1PFB3	W1PLL1	0.8142	0.8821	0.051	0.0679
14110	0.48	0.763	AMBTC	W1PD39	U5DA19	0.6754	0.7501	0.283	0.0747
14145	0.042	0.059	AMBTC	W1PCU7	W1PZL8	0.991	0.995	0.017	0.004
14155	0.282	0.473	AMBTC	W1P0N9	W1NJK4	0.687	0.6788	0.191	-0.0082
14167	0.3	0.422	AMBTC	U5CZV7	W1PSG7	0.9081	0.59	0.122	-0.3181
14167	0.3	0.321	AMBTC	U5CZV7	W1NL64	0.8812	0.9095	0.021	0.0283
14209	0.436	0.61	AMBTC	W1NXM8	W1PQ17	0.7546	0.7325	0.174	-0.0221
14209	0.357	0.376	AMBTC	W1NXM8	W1PZU1	0.8957	0.8986	0.019	0.0029
14221	0.397	0.484	AMBTC	W1NJ49	U5DAQ5	0.7168	0.7803	0.087	0.0635
14221	0.436	0.58	AMBTC	U5DAQ5	U5D6V7	0.7775	0.7467	0.144	-0.0308
14221	0.39	0.414	AMBTC	W1NJ49	U5D6F9	0.8146	0.7873	0.024	-0.0273
14237	0.317	0.356	AMBTC	U5DG62	U5D8F0	0.755	0.7598	0.039	0.0048
14237	0.338	0.636	AMBTC	U5DG62	U5D327	0.7812	0.7767	0.298	-0.0045
14255	0.382	0.499	AMBTC	W1PXV9	W1NPH2	0.7346	0.6658	0.117	-0.0688
14255	0.359	0.424	AMBTC	W1NPH2	W1P049	0.6908	0.78	0.065	0.0892
14255	0.117	0.142	AMBTC	W1NPH2	W1NTQ6	0.8984	0.8378	0.025	-0.0606
14296	0.518	0.535	AMBTC	W1P9Y4	W1P8I0	0.7671	0.7747	0.017	0.0076
14326	0.466	0.695	AMBTC	U5D282	U5DGD3	0.7262	0.6722	0.229	-0.054
14363	0.294	0.38	AMBTC	U5D1R2	W1NX76	0.8811	0.8706	0.086	-0.0105
14363	0.294	0.353	AMBTC	U5D1R2	W1NYX5	0.8829	0.8706	0.059	-0.0123
14379	0.277	0.684	AMBTC	W1NXC0	W1PXJ7	0.638	0.6618	0.407	0.0238
14493	0.151	0.238	AMBTC	W1P021	W1PDX7	0.7458	0.7708	0.087	0.025
14493	0.277	0.383	AMBTC	U5D1G8	U5D5M3	0.7139	0.7993	0.106	0.0854
14552	0.232	0.261	AMBTC	W1PJY0	U5CZL9	0.9768	0.9359	0.029	-0.0409
14552	0.232	0.234	AMBTC	W1PJY0	U5D1X2	0.9292	0.9359	0.002	0.0067
14552	0.104	0.132	AMBTC	U5D1X2	W1PGB6	0.9418	0.9463	0.028	0.0045
14552	0.104	0.123	AMBTC	U5D1X2	U5DGQ6	0.9015	0.9463	0.019	0.0448
14552	0.104	0.113	AMBTC	U5D1X2	U5DAR7	0.9071	0.9144	0.009	0.0073
14677	0.279	0.487	AMBTC	W1PI31	W1P1N8	0.8143	0.8088	0.208	-0.0055
14738	0.65	0.989	AMBTC	W1PX97	W1PP14	0.8255	0.7342	0.339	-0.0913
14741	0.325	0.338	AMBTC	W1P8I8	W1PHC3	0.9267	0.7606	0.013	-0.1661
14773	0.746	0.757	AMBTC	W1PK22	W1PSU1	0.7873	0.7799	0.011	-0.0074
14791	0.368	0.666	AMBTC	W1PGG4	U5CWS9	0.7065	0.6108	0.298	-0.0957
14795	0.364	0.421	AMBTC	W1PU66	W1NF52	0.7885	0.7959	0.057	0.0074
14898	0.228	0.369	AMBTC	W1PWN6	U5DF14	0.7633	0.8618	0.141	0.0985
14939	0.47	0.517	AMBTC	W1PRK7	W1PPA5	0.7733	0.728	0.047	-0.0453
14950	0.427	0.518	AMBTC	W1PCN6	W1P6G4	0.8488	0.8368	0.091	-0.012
14950	0.427	0.682	AMBTC	W1PCN6	W1PPG0	0.7626	0.822	0.255	0.0594
15004	0.449	0.449	AMBTC	W1NXQ0	U5DE95	0.8702	0.8573	0	-0.0129
15160	0.489	0.683	AMBTC	W1NKE0	W1PMV4	0.6413	0.7136	0.194	0.0723
15184	0.011	0.011	AMBTC	W1NP03	Q70XZ6	0.987	0.9893	0	0.0023
15184	0.011	0.011	AMBTC	W1NP03	W1NZ42	0.9983	0.9893	0	-0.009
15204	0.467	0.535	AMBTC	U5D1M5	W1NLK9	0.7717	0.7876	0.068	0.0159
15288	0.329	0.439	AMBTC	U5D0Y0	W1PVD0	0.7716	0.7426	0.11	-0.029
15315	0.174	0.278	AMBTC	W1NID7	W1PZM8	0.8328	0.8366	0.104	0.0038
15315	0.153	0.219	AMBTC	W1NID7	W1PP01	0.8951	0.9007	0.066	0.0056
15319	0.436	0.471	AMBTC	W1P7H3	U5CXU0	0.5495	0.4921	0.035	-0.0574
15319	0.436	0.436	AMBTC	W1P7H3	W1NXU1	0.6267	0.5984	0	-0.0283
15319	0.436	0.544	AMBTC	W1P7H3	W1NMN2	0.5468	0.4426	0.108	-0.1042
15319	0.436	0.436	AMBTC	W1P7H3	W1P5F6	0.6683	0.4443	0	-0.224
15350	0.18	0.209	AMBTC	U5DAK4	U5D637	0.9566	0.9656	0.029	0.009
15371	0.282	0.304	AMBTC	W1PRX8	W1PYE6	0.8502	0.9288	0.022	0.0786
15454	0.347	0.348	AMBTC	W1NS02	U5CXI3	0.7679	0.8004	0.001	0.0325
15486	0.233	0.34	AMBTC	W1NIJ3	W1P0G0	0.8459	0.9278	0.107	0.0819
15486	0.233	0.263	AMBTC	W1NIJ3	W1P927	0.9296	0.9278	0.03	-0.0018
15486	0.41	0.425	AMBTC	W1P0G0	W1PXU4	0.9068	0.877	0.015	-0.0298
15546	0.674	0.677	AMBTC	U5DIY9	U5D2Z6	0.7914	0.7696	0.003	-0.0218
15574	0.249	0.284	AMBTC	W1NL95	W1PD00	0.8782	0.8596	0.035	-0.0186
15592	0.122	0.15	AMBTC	W1NYE2	W1NH53	0.8687	0.8749	0.028	0.0062
15592	0.098	0.137	AMBTC	U5D0N1	W1PCA2	0.925	0.9315	0.039	0.0065
15601	0.198	0.339	AMBTC	W1PSB1	W1PP52	0.8098	0.6414	0.141	-0.1684
15615	0.366	0.459	AMBTC	W1PWX9	W1PXL9	0.5903	0.6128	0.093	0.0225
15615	0.287	0.555	AMBTC	W1PWX9	W1NTG3	0.8172	0.8697	0.268	0.0525
15615	0.287	0.353	AMBTC	W1PWX9	W1NU03	0.9007	0.7992	0.066	-0.1015
15629	0.241	0.245	AMBTC	W1NZ80	W1NP88	0.8624	0.8767	0.004	0.0143
15663	0.205	0.222	AMBTC	W1PIZ1	W1NYY8	0.8976	0.9336	0.017	0.036
15672	0.407	0.526	AMBTC	W1PZN7	W1NV13	0.7036	0.7478	0.119	0.0442
15696	0.437	0.501	AMBTC	U5D3W4	U5D9D5	0.7081	0.7264	0.064	0.0183
15710	0.374	0.537	AMBTC	W1NXJ0	W1P7W0	0.5265	0.5563	0.163	0.0298
15710	0.518	0.852	AMBTC	W1P7W0	W1PIY4	0.6952	0.5128	0.334	-0.1824
15710	0.518	0.708	AMBTC	W1P7W0	W1PDF0	0.8396	0.5128	0.19	-0.3268
15710	0.518	0.52	AMBTC	W1P7W0	W1PIY0	0.803	0.5128	0.002	-0.2902
15710	0.518	0.52	AMBTC	W1P7W0	W1PNU5	0.8852	0.5128	0.002	-0.3724
15710	0.163	0.746	AMBTC	W1PDF0	W1NVT3	0.7423	0.6468	0.583	-0.0955
15710	0.163	0.29	AMBTC	W1PDF0	W1NH61	0.784	0.8053	0.127	0.0213
15725	0.597	0.678	AMBTC	W1PA63	W1PHS8	0.7925	0.7287	0.081	-0.0638
15835	0.418	0.452	AMBTC	W1PIE4	W1NX08	0.7164	0.8013	0.034	0.0849
15852	0.167	0.218	AMBTC	W1PSM5	W1NU37	0.8468	0.8003	0.051	-0.0465
15893	0.316	0.431	AMBTC	W1PPU8	U5CTW9	0.7584	0.7574	0.115	-0.001
15907	0.316	0.526	AMBTC	W1NFT2	W1NU01	0.5283	0.6212	0.21	0.0929
15907	0.303	0.466	AMBTC	W1NFT2	W1NFR7	0.7627	0.593	0.163	-0.1697
16099	0.31	0.408	AMBTC	W1P4Q9	W1P6F7	0.7742	0.8475	0.098	0.0733
16134	0.199	0.244	AMBTC	W1P742	W1P7H0	0.9155	0.9393	0.045	0.0238
16134	0.211	0.242	AMBTC	W1P742	W1P8I7	0.9266	0.9431	0.031	0.0165
16201	0.355	0.386	AMBTC	W1NWI0	U5D592	0.7491	0.7485	0.031	-0.0006
16201	0.284	0.311	AMBTC	W1NWI0	W1NUQ0	0.6847	0.7299	0.027	0.0452
16223	0.131	0.238	AMBTC	W1PT28	W1NSL6	0.8564	0.8274	0.107	-0.029
16223	0.144	0.29	AMBTC	W1NSL6	W1PNR7	0.6466	0.702	0.146	0.0554
16223	0.144	0.29	AMBTC	W1NSL6	W1PXR5	0.7548	0.702	0.146	-0.0528
16223	0.144	0.246	AMBTC	W1NSL6	W1PPJ0	0.7421	0.702	0.102	-0.0401
16223	0.256	0.293	AMBTC	W1NG05	W1NHF6	0.7578	0.6462	0.037	-0.1116
16255	0.295	0.386	AMBTC	W1NJY3	W1P9F1	0.798	0.8077	0.091	0.0097
16469	0.444	0.71	AMBTC	W1NST7	W1NY88	0.7764	0.8377	0.266	0.0613
16469	0.444	0.71	AMBTC	W1NST7	W1PRQ8	0.6824	0.7607	0.266	0.0783
16517	0.033	0.041	AMBTC	W1NGY4	W1PZG2	0.7815	0.7805	0.008	-0.001
16517	0.141	0.228	AMBTC	W1PZG2	W1PSZ7	0.7801	0.7842	0.087	0.0041
16517	0.157	0.187	AMBTC	W1NGY4	U5CU96	0.8608	0.7993	0.03	-0.0615
16517	0.157	0.323	AMBTC	W1NGY4	W1NPG7	0.805	0.8462	0.166	0.0412
16719	0.387	0.433	AMBTC	W1NH24	U5DBG7	0.8875	0.792	0.046	-0.0955
17204	0.359	0.454	AMBTC	U5D3C6	W1PX04	0.8002	0.7324	0.095	-0.0678
17224	0.387	0.45	AMBTC	U5DA64	U5DDY3	0.8918	0.9302	0.063	0.0384
17224	0.387	0.464	AMBTC	U5DA64	U5D218	0.9071	0.9302	0.077	0.0231
17224	0.099	0.211	AMBTC	U5D218	W1P2D1	0.872	0.7903	0.112	-0.0817
17605	0.372	0.382	AMBTC	W1PMN9	W1PC89	0.9343	0.9198	0.01	-0.0145
17630	0.311	0.344	AMBTC	W1PX30	W1PY30	0.8616	0.9002	0.033	0.0386
17901	0.193	0.239	AMBTC	U5CZ39	U5CMN8	0.8349	0.9691	0.046	0.1342
17985	0.357	0.484	AMBTC	U5D9Z3	U5D442	0.8952	0.9107	0.127	0.0155
18829	0.528	0.546	AMBTC	W1PBJ9	W1PT16	0.6928	0.7357	0.018	0.0429
18860	0.06	0.154	AMBTC	U5CX75	W1P5M0	0.9821	0.9589	0.094	-0.0232
18860	0.067	0.134	AMBTC	W1NXG6	U5CWX5	0.9807	0.9772	0.067	-0.0035
18896	0.322	0.356	AMBTC	W1NKC5	W1P7V6	0.8578	0.76	0.034	-0.0978
18896	0.182	0.427	AMBTC	W1P7V6	W1PII8	0.8553	0.9083	0.245	0.053
18896	0.226	0.281	AMBTC	W1NKC5	U5D1C5	0.8667	0.8648	0.055	-0.0019
18896	0.226	0.235	AMBTC	W1NKC5	U5DET4	0.9065	0.9072	0.009	0.0007
18901	0.287	0.297	AMBTC	W1PH70	W1NRA9	0.9198	0.9492	0.01	0.0294
18929	0.462	0.588	AMBTC	U5D3J4	W1NSD6	0.7839	0.796	0.126	0.0121
18934	0.156	0.171	AMBTC	W1PDK0	W1NDI4	0.8858	0.8869	0.015	0.0011
18952	0.474	0.5	AMBTC	U5CTF7	W1PCH5	0.7017	0.694	0.026	-0.0077
18952	0.331	0.58	AMBTC	W1PCH5	W1PKH6	0.847	0.7722	0.249	-0.0748
18952	0.331	0.58	AMBTC	W1PCH5	W1PHZ1	0.8897	0.7722	0.249	-0.1175
18966	0.471	0.663	AMBTC	U5D3Z6	W1PHR0	0.8085	0.6233	0.192	-0.1852
18966	0.471	0.732	AMBTC	U5D3Z6	W1Q0E4	0.7798	0.822	0.261	0.0422
18966	0.471	0.475	AMBTC	U5D3Z6	U5DAL3	0.871	0.8363	0.004	-0.0347
19211	0.07	0.115	AMBTC	W1PU83	W1P0D5	0.9519	0.8976	0.045	-0.0543
19248	0.028	0.112	AMBTC	U5DC51	W1NTU5	0.9813	0.9796	0.084	-0.0017
19282	0.385	0.576	AMBTC	W1NJ23	W1PNK4	0.6591	0.7821	0.191	0.123
19282	0.385	0.504	AMBTC	W1NJ23	U5D2Z5	0.6741	0.7821	0.119	0.108
19282	0.25	0.262	AMBTC	W1PNK4	W1PNG4	0.8796	0.8649	0.012	-0.0147
19288	0.542	0.978	AMBTC	U5D3F5	U5DDH4	0.5618	0.6757	0.436	0.1139
19288	0.374	0.376	AMBTC	U5D3F5	U5DFL1	0.8354	0.8164	0.002	-0.019
19308	0.503	0.567	AMBTC	W1P5P2	W1PXA2	0.6939	0.5742	0.064	-0.1197
19308	0.318	0.372	AMBTC	W1P5P2	W1P0E3	0.8445	0.8596	0.054	0.0151
19308	0.092	0.582	AMBTC	W1P5P2	W1PHN2	0.8356	0.7809	0.49	-0.0547
19316	0.728	0.747	AMBTC	W1PLE8	W1P977	0.6907	0.7366	0.019	0.0459
19321	0.303	0.427	AMBTC	W1P218	W1PPF3	0.8978	0.8781	0.124	-0.0197
19321	0.303	0.331	AMBTC	W1P218	W1PT57	0.8993	0.8781	0.028	-0.0212
19321	0.303	0.374	AMBTC	W1P218	W1NWL5	0.9062	0.8781	0.071	-0.0281
19321	0.303	0.365	AMBTC	W1P218	W1PY75	0.8898	0.8756	0.062	-0.0142
19338	0.892	1.128	AMBTC	W1NPN5	W1PDN9	0.5979	0.504	0.236	-0.0939
19338	0.892	0.974	AMBTC	W1NPN5	U5DAI9	0.8201	0.7037	0.082	-0.1164
19338	0.892	1.128	AMBTC	W1NPN5	W1P1Y0	0.6375	0.6436	0.236	0.0061
19338	0.892	1.128	AMBTC	W1NPN5	W1NEG2	0.6214	0.6436	0.236	0.0222
19359	0.112	0.481	AMBTC	W1PLY1	U5DHZ8	0.8384	0.8008	0.369	-0.0376
19359	0.169	0.202	AMBTC	W1PLY1	W1PL46	0.8493	0.9191	0.033	0.0698
19375	0.128	0.216	AMBTC	W1NRJ1	W1NFB7	0.9555	0.9497	0.088	-0.0058
19375	0.049	0.052	AMBTC	W1NIA7	W1NZ92	0.9775	0.9743	0.003	-0.0032
19375	0.044	0.072	AMBTC	U5D6M8	W1PNA1	0.9711	0.9705	0.028	-0.0006
19411	0.057	0.064	AMBTC	W1P3A2	U5CPZ3	0.9781	0.9976	0.007	0.0195
19431	0.086	0.094	AMBTC	W1NIV8	W1NXE4	0.9854	0.9793	0.008	-0.0061
19432	0.246	0.317	AMBTC	W1NF25	U5CM42	0.7753	0.7657	0.071	-0.0096
19432	0.199	0.212	AMBTC	U5CM42	W1PRG5	0.872	0.9044	0.013	0.0324
19432	0.138	0.229	AMBTC	W1NF25	W1NGR0	0.834	0.8686	0.091	0.0346
19443	0.186	0.295	AMBTC	U5D4A0	W1PB02	0.9001	0.9149	0.109	0.0148
19443	0.186	0.291	AMBTC	U5D4A0	W1NQ25	0.9007	0.9149	0.105	0.0142
19443	0.178	0.205	AMBTC	W1NQ25	U5DE94	0.7654	0.7697	0.027	0.0043
19861	0.143	0.147	AMBTC	W1PMD8	U5D8D0	0.862	0.8425	0.004	-0.0195
19876	0.042	0.236	AMBTC	W1NLI2	W1PCJ0	0.8776	0.6703	0.194	-0.2073
19918	0.117	0.208	AMBTC	U5D4Q3	W1PJL7	0.9222	0.9131	0.091	-0.0091
19918	0.159	0.427	AMBTC	U5D5L2	U5CKR7	0.928	0.8194	0.268	-0.1086
19918	0.159	0.173	AMBTC	U5D5L2	W1PBE0	0.8206	0.9235	0.014	0.1029
19918	0.159	0.173	AMBTC	U5D5L2	W1NNB5	0.8964	0.9142	0.014	0.0178
19919	0.21	0.25	AMBTC	W1PEL2	W1PZN0	0.9521	0.9769	0.04	0.0248
19919	0.173	0.301	AMBTC	W1PEL2	W1NM71	0.9256	0.8738	0.128	-0.0518
19957	0.144	0.3	AMBTC	W1NQA9	W1PPW1	0.8282	0.8464	0.156	0.0182
19957	0.153	0.304	AMBTC	W1NDI9	W1PZ02	0.8385	0.8395	0.151	0.001
19957	0.223	0.329	AMBTC	W1PZ02	W1NWC7	0.8404	0.8403	0.106	-0.0001
19957	0.223	0.239	AMBTC	W1PZ02	W1NZY4	0.8705	0.8403	0.016	-0.0302
19957	0.377	0.398	AMBTC	W1NWC7	W1P1P3	0.8002	0.8748	0.021	0.0746
19957	0.139	0.147	AMBTC	U5D9N6	W1PM72	0.9122	0.9252	0.008	0.013
19957	0.162	0.212	AMBTC	U5DBI9	W1PFD2	0.8492	0.7641	0.05	-0.0851
19961	0.233	0.24	AMBTC	W1PFQ4	U5DD49	0.8452	0.8506	0.007	0.0054
19965	0.245	0.275	AMBTC	W1PI99	W1NG52	0.739	0.7843	0.03	0.0453
20852	0.102	0.165	AMBTC	W1PCQ1	W1PX38	0.9612	0.9778	0.063	0.0166
20852	0.102	0.105	AMBTC	W1PCQ1	W1NJA2	0.9798	0.9778	0.003	-0.002
20852	0.081	0.109	AMBTC	W1PCQ1	W1NKU0	1	0.9971	0.028	-0.0029
20855	0.256	0.426	AMBTC	U5D8R5	U5CWK0	0.8749	0.8295	0.17	-0.0454
20855	0.256	0.43	AMBTC	U5D8R5	W1PHC7	0.8685	0.8226	0.174	-0.0459
20856	0.029	0.137	AMBTC	P60282	W1NYV8	0.8442	0.8302	0.108	-0.014
20861	0.208	0.271	AMBTC	W1PC83	W1PYD2	0.849	0.7468	0.063	-0.1022
20863	0.228	0.496	AMBTC	W1NT38	W1PYL7	0.8434	0.8726	0.268	0.0292
20863	0.228	0.257	AMBTC	W1NT38	W1PBV2	0.8265	0.8521	0.029	0.0256
20881	0.166	0.22	AMBTC	U5D9Q5	U5DCS9	0.9192	0.8711	0.054	-0.0481
20884	0.202	0.612	AMBTC	W1PCP7	W1PIY8	0.7367	0.7801	0.41	0.0434
20889	0.313	0.313	AMBTC	U5CZ81	U5CZR2	0.917	0.8958	0	-0.0212
20921	0.363	0.381	AMBTC	W1P136	U5D4V6	0.8885	0.8488	0.018	-0.0397
20922	0.707	0.758	AMBTC	U5DCB5	W1NLW2	0.6664	0.6182	0.051	-0.0482
20922	0.707	0.713	AMBTC	U5DCB5	W1NGE1	0.5567	0.628	0.006	0.0713
20953	0.326	0.399	AMBTC	W1PZU5	W1NWS4	0.7963	0.5786	0.073	-0.2177
20953	0.234	0.328	AMBTC	W1PZU5	W1P028	0.8363	0.8622	0.094	0.0259
20961	0.518	0.58	AMBTC	W1PDB2	W1P719	0.848	0.8582	0.062	0.0102
20961	0.433	0.457	AMBTC	W1NWA3	W1NTU9	0.8825	0.6897	0.024	-0.1928
20961	0.537	0.691	AMBTC	W1P1X1	U5CQW9	0.7486	0.794	0.154	0.0454
20963	0.255	0.255	AMBTC	W1NQ92	W1PDT4	0.919	0.9012	0	-0.0178
20981	0.08	0.093	AMBTC	W1P933	W1PSX2	0.9914	0.9889	0.013	-0.0025
21022	0.139	0.156	AMBTC	W1Q003	U5CVN8	0.8722	0.8211	0.017	-0.0511
21049	0.408	0.438	AMBTC	U5D4I6	W1PKU2	0.9271	0.9069	0.03	-0.0202
21057	0.081	0.085	AMBTC	W1PIV7	U5DCB1	0.9854	0.9836	0.004	-0.0018
21068	0.6	0.663	AMBTC	U5DCT0	W1NFL4	0.4685	0.6017	0.063	0.1332
21087	0.31	0.549	AMBTC	W1NFV3	W1PF38	0.7712	0.6492	0.239	-0.122
21089	0.208	0.273	AMBTC	U5D5Z9	U5D353	0.9167	0.8946	0.065	-0.0221
21089	0.208	0.283	AMBTC	U5D5Z9	U5D8Z0	0.9174	0.9467	0.075	0.0293
21091	0.113	0.361	AMBTC	W1P3Y2	W1PGT2	0.8797	0.9555	0.248	0.0758
21094	0.183	0.222	AMBTC	W1NGX4	W1NNW8	0.9009	0.8596	0.039	-0.0413
21136	0.636	0.707	AMBTC	W1PXR4	U5D9G5	0.6424	0.6523	0.071	0.0099
21136	0.247	0.319	AMBTC	U5D9G5	U5D2X7	0.7689	0.8093	0.072	0.0404
21136	0.247	0.382	AMBTC	U5D9G5	U5CUN8	0.8436	0.8577	0.135	0.0141
21136	0.221	0.336	AMBTC	W1PXR4	U5CXE3	0.8611	0.827	0.115	-0.0341
21145	0.202	0.272	AMBTC	U5D896	W1PFX5	0.9157	0.9152	0.07	-0.0005
21181	0.292	0.302	AMBTC	U5CZD9	U5CYV6	0.8628	0.861	0.01	-0.0018
21229	0.224	0.244	AMBTC	W1NIH0	W1NR75	0.8599	0.8785	0.02	0.0186
21229	0.326	0.48	AMBTC	W1P0Q2	U5D085	0.7948	0.8246	0.154	0.0298
21229	0.326	0.43	AMBTC	W1P0Q2	W1PKK1	0.8303	0.8446	0.104	0.0143
21229	0.183	0.674	AMBTC	W1PKK1	U5DE78	0.8266	0.8777	0.491	0.0511
21230	0.107	0.146	AMBTC	W1P4V6	W1P5X4	0.7785	0.7776	0.039	-0.0009
21230	0.059	0.07	AMBTC	W1NUF6	U5D3V8	0.974	0.9609	0.011	-0.0131
21231	1.197	1.204	AMBTC	W1NK71	W1P8J9	0.7001	0.6876	0.007	-0.0125
21237	0.385	0.391	AMBTC	W1NF00	U5D1I4	0.8924	0.8925	0.006	0.0001
21237	0.345	0.398	AMBTC	W1PKQ1	W1NNE9	0.924	0.9218	0.053	-0.0022
21243	0.458	0.604	AMBTC	W1NHY8	W1NZS4	0.814	0.8279	0.146	0.0139
21250	0.479	0.521	AMBTC	W1NDG7	W1PFP2	0.8883	0.8181	0.042	-0.0702
21277	0.44	0.587	AMBTC	W1PHC8	W1P7S0	0.7434	0.7443	0.147	0.0009
21292	0.091	0.296	AMBTC	W1P9C6	W1Q062	0.7302	0.8266	0.205	0.0964
21297	0.541	0.554	AMBTC	W1NQB2	U5DCM4	0.7933	0.6542	0.013	-0.1391
21314	0.128	0.149	AMBTC	W1NES3	W1NFE8	0.9315	0.7929	0.021	-0.1386
21319	0.293	0.303	AMBTC	U5D652	W1P810	0.9392	0.9351	0.01	-0.0041
21319	0.293	0.296	AMBTC	U5D652	W1NXW7	0.935	0.9351	0.003	0.0001
21321	1.364	1.414	AMBTC	W1NI63	W1PWB2	0.6494	0.6793	0.05	0.0299
21337	0.089	0.091	AMBTC	W1NJW2	W1P279	0.9782	0.9724	0.002	-0.0058
21349	0.373	0.463	AMBTC	U5DDA4	U5D9Q3	0.8187	0.6933	0.09	-0.1254
21377	0.528	0.707	AMBTC	W1NWB8	U5D740	0.7012	0.7299	0.179	0.0287
21428	0.08	0.329	AMBTC	W1PK35	W1NEY4	0.8024	0.9203	0.249	0.1179
21450	0.591	0.786	AMBTC	U5D9Y4	W1NU05	0.7308	0.7407	0.195	0.0099
21450	0.591	0.676	AMBTC	U5D9Y4	W1NVA3	0.7686	0.7756	0.085	0.007
21450	0.591	0.667	AMBTC	U5D9Y4	W1NGF2	0.7609	0.7756	0.076	0.0147
21450	0.591	0.609	AMBTC	U5D9Y4	W1NX56	0.7445	0.7756	0.018	0.0311
21461	0.426	0.453	AMBTC	W1Q0R3	U5D7A5	0.326	0.742	0.027	0.416
21481	0.584	0.612	AMBTC	U5D418	W1PIJ9	0.7343	0.6824	0.028	-0.0519
21493	0.105	0.201	AMBTC	W1NZT8	W1P230	0.9546	0.8818	0.096	-0.0728
21495	0.214	0.828	AMBTC	W1PZ44	U5D5C1	0.6853	0.6857	0.614	0.0004
21562	0.4	0.468	AMBTC	W1NHY1	W1PJB1	0.8384	0.7729	0.068	-0.0655
21569	0.131	0.14	AMBTC	W1P380	U5D6S7	0.9614	0.9694	0.009	0.008
21576	0.158	0.173	AMBTC	W1PP59	W1PQ52	0.8616	0.8537	0.015	-0.0079
21576	0.238	0.27	AMBTC	W1PTL5	W1PKH3	0.853	0.9204	0.032	0.0674
21600	0.38	0.426	AMBTC	W1PFR8	W1PAY1	0.7475	0.657	0.046	-0.0905
21631	0.075	0.095	AMBTC	W1NEA3	W1NF26	0.9812	0.9695	0.02	-0.0117
21631	0.075	0.092	AMBTC	W1NEA3	W1NEA8	0.981	0.9662	0.017	-0.0148
21641	0.33	0.337	AMBTC	U5D585	W1P8G4	0.7906	0.8395	0.007	0.0489
21646	0.319	0.429	AMBTC	W1NDK1	W1NXN1	0.5439	0.7532	0.11	0.2093
21646	0.105	0.135	AMBTC	W1NDK1	W1PV19	0.8221	0.7113	0.03	-0.1108
21649	0.148	0.247	AMBTC	W1PQ43	W1NW18	0.8905	0.8311	0.099	-0.0594
21654	0.138	0.157	AMBTC	W1PGN0	U5CZV3	0.8251	0.6254	0.019	-0.1997
21660	0.829	0.852	AMBTC	W1NSH4	W1PZ50	0.845	0.7871	0.023	-0.0579
21668	0	0	AMBTC	U5D5U4	W1PCQ0	0.9665	0.9649	0	-0.0016
21717	0.628	0.632	AMBTC	W1PLA4	W1NI31	0.8222	0.8372	0.004	0.015
22166	0.338	0.364	AMBTC	W1P082	W1P3Q3	0.8743	0.813	0.026	-0.0613
22298	0.321	0.371	AMBTC	W1PTV9	W1PBR2	0.9253	0.9005	0.05	-0.0248
22298	0.139	0.258	AMBTC	W1PWF4	W1PN08	0.9243	0.9197	0.119	-0.0046
22298	0.139	0.212	AMBTC	W1PWF4	W1NXV0	0.9351	0.9197	0.073	-0.0154
22298	0.16	0.176	AMBTC	W1NXV0	W1NWT6	0.9807	0.9357	0.016	-0.045
22298	0.229	0.271	AMBTC	U5DBI1	U5DDA8	0.9014	0.9081	0.042	0.0067
22298	0.229	0.434	AMBTC	U5DBI1	U5DHG6	0.8321	0.904	0.205	0.0719
22298	0.277	0.319	AMBTC	W1NRV2	W1PT14	0.8844	0.9043	0.042	0.0199
22298	0.277	0.318	AMBTC	W1NRV2	W1NEF7	0.9083	0.9043	0.041	-0.004
22298	0.277	0.28	AMBTC	W1NRV2	W1NWQ4	0.8782	0.9043	0.003	0.0261
22298	0.277	0.326	AMBTC	W1NRV2	W1P5J7	0.7426	0.9063	0.049	0.1637
22572	0.134	0.169	AMBTC	W1PJY2	W1PDN1	0.9906	0.9865	0.035	-0.0041
22594	0.152	0.306	AMBTC	W1NFW1	W1PP82	0.8947	0.8513	0.154	-0.0434
22595	0.555	0.622	AMBTC	U5D412	W1PW01	0.7378	0.7059	0.067	-0.0319
22595	0.205	0.207	AMBTC	U5D412	W1NLJ5	0.8439	0.7059	0.002	-0.138
22595	0.181	0.187	AMBTC	U5D412	U5DDN8	0.7767	0.7268	0.006	-0.0499
22595	0.228	0.339	AMBTC	W1NLJ5	W1P395	0.9312	0.7763	0.111	-0.1549
22595	0.295	0.314	AMBTC	W1NLJ5	W1NMC3	0.8903	0.9314	0.019	0.0411
22599	0.035	0.094	AMBTC	U5CR51	W1PML4	0.9769	0.9293	0.059	-0.0476
22600	0.222	0.25	AMBTC	U5DFH7	U5DFF4	0.8307	0.9404	0.028	0.1097
22601	0.278	0.435	AMBTC	W1PZ78	U5D664	0.8909	0.9335	0.157	0.0426
22601	0.278	0.343	AMBTC	W1PZ78	U5DAH2	0.9144	0.9418	0.065	0.0274
22601	0.167	0.247	AMBTC	W1PZ78	W1PYH0	0.9659	0.9124	0.08	-0.0535
22601	0.167	0.247	AMBTC	W1PZ78	W1PZ00	0.9106	0.9889	0.08	0.0783
22601	0.167	0.247	AMBTC	W1PZ78	W1PZ04	0.8466	0.9889	0.08	0.1423
22691	0.671	0.682	AMBTC	W1PL42	U5D3U7	0.833	0.8324	0.011	-0.0006
22748	0.356	0.678	AMBTC	U5DAW1	W1PUQ5	0.6543	0.6799	0.322	0.0256
22753	0.286	0.32	AMBTC	U5D377	W1PE52	0.7612	0.8078	0.034	0.0466
22753	0.224	0.234	AMBTC	U5D377	U5CUA2	0.9106	0.781	0.01	-0.1296
22761	0.23	0.526	AMBTC	W1P8S1	W1NSW9	0.8386	0.8378	0.296	-0.0008
22761	0.034	0.213	AMBTC	W1P856	U5CSA4	0.831	0.8198	0.179	-0.0112
22762	0.392	0.448	AMBTC	W1NX46	W1P8D8	0.9039	0.8852	0.056	-0.0187
22762	0.144	0.164	AMBTC	W1P8D8	W1P8K7	0.9429	0.9081	0.02	-0.0348
22765	0.131	0.315	AMBTC	W1NSJ5	W1PE64	0.8099	0.8164	0.184	0.0065
22768	0.242	0.301	AMBTC	U5DEA4	W1NGZ1	0.7799	0.8666	0.059	0.0867
22773	0.019	0.019	AMBTC	P0CC25	P0CC26	0.971	0.9622	0	-0.0088
22792	0.326	0.345	AMBTC	U5DFH0	W1PPY0	0.7924	0.8298	0.019	0.0374
22792	0.326	0.4	AMBTC	U5DFH0	W1PIR5	0.8524	0.7893	0.074	-0.0631
22809	0.497	0.693	AMBTC	U5CT54	W1NI87	0.7177	0.8486	0.196	0.1309
22811	0.624	0.66	AMBTC	U5DCT2	W1P1H9	0.866	0.7012	0.036	-0.1648
22814	0.333	0.448	AMBTC	W1PSW7	W1NFL6	0.8583	0.6488	0.115	-0.2095
22814	0.213	0.435	AMBTC	W1PH39	W1NLM9	0.748	0.8666	0.222	0.1186
22835	0.279	0.381	AMBTC	W1NKF0	W1PZT0	0.7042	0.7352	0.102	0.031
22835	0.39	0.436	AMBTC	W1PUZ9	W1P558	0.7865	0.8152	0.046	0.0287
22835	0.39	0.496	AMBTC	W1PUZ9	W1Q0X8	0.7564	0.8152	0.106	0.0588
22835	0.271	0.297	AMBTC	W1Q0X8	W1Q0D5	0.8762	0.8612	0.026	-0.015
22835	0.271	0.397	AMBTC	W1Q0X8	W1PZM2	0.8417	0.8678	0.126	0.0261
22838	0.369	0.369	AMBTC	W1PKN2	U5D678	0.888	0.8835	0	-0.0045
22844	0.42	0.509	AMBTC	W1NPM7	W1PDJ4	0.7929	0.7638	0.089	-0.0291
22847	0.146	0.272	AMBTC	W1NZR8	W1NZR5	0.9536	0.9663	0.126	0.0127
22849	0.163	0.456	AMBTC	W1NEM8	U5D7Z6	0.7414	0.3794	0.293	-0.362
22849	0.354	0.385	AMBTC	W1NEM8	W1PNG6	0.7859	0.7643	0.031	-0.0216
22849	0.543	0.714	AMBTC	W1NEM8	W1PML5	0.7294	0.7625	0.171	0.0331
22849	0.543	0.681	AMBTC	W1NEM8	U5D0X3	0.7763	0.7625	0.138	-0.0138
22849	0.543	0.677	AMBTC	W1NEM8	U5DFU2	0.7117	0.7643	0.134	0.0526
22849	0.543	0.602	AMBTC	W1NEM8	U5D1J3	0.7449	0.7643	0.059	0.0194
22849	0.503	0.598	AMBTC	U5D1J3	U5CS89	0.8451	0.8611	0.095	0.016
22850	0.109	0.381	AMBTC	W1NQR5	W1NT51	0.8672	0.8847	0.272	0.0175
22850	0.109	0.535	AMBTC	W1NQR5	W1NYJ6	0.6757	0.7704	0.426	0.0947
22870	0.164	0.398	AMBTC	U5D1X0	U5D9N0	0.8342	0.8253	0.234	-0.0089
22870	0.164	0.248	AMBTC	U5D1X0	U5D1G7	0.8741	0.8253	0.084	-0.0488
22870	0.164	0.269	AMBTC	U5D1X0	U5D4V2	0.8528	0.8253	0.105	-0.0275
22870	0.104	0.145	AMBTC	U5D1X0	W1NGS8	0.8722	0.8704	0.041	-0.0018
22883	0.297	0.397	AMBTC	W1PIX0	W1NGA6	0.8528	0.8452	0.1	-0.0076
22883	0.472	0.599	AMBTC	W1P9D1	W1NWM3	0.7174	0.754	0.127	0.0366
22883	0.126	0.202	AMBTC	W1PYE9	W1NSC4	0.8439	0.8899	0.076	0.046
22883	0.087	0.203	AMBTC	W1PEX4	U5D7G7	0.8336	0.6477	0.116	-0.1859
22883	0.2	0.266	AMBTC	W1PEX4	W1PF63	0.9266	0.8978	0.066	-0.0288
22883	0.2	0.342	AMBTC	W1PEX4	W1NU73	0.8549	0.8489	0.142	-0.006
22883	0.2	0.216	AMBTC	W1PEX4	W1PNH4	0.9057	0.8489	0.016	-0.0568
22883	0.153	0.162	AMBTC	W1PNH4	W1NL74	0.8881	0.8996	0.009	0.0115
22890	0.327	0.345	AMBTC	W1P6Z7	W1PYC6	0.9316	0.9138	0.018	-0.0178
22891	0.183	0.572	AMBTC	U5D4D1	W1NHV8	0.796	0.7665	0.389	-0.0295
22891	0.098	0.109	AMBTC	U5D4D1	W1NN88	0.9355	0.9216	0.011	-0.0139
22891	0.098	0.641	AMBTC	U5D4D1	W1PFL0	0.7608	0.7844	0.543	0.0236
22891	0.098	0.68	AMBTC	U5D4D1	U5CXE5	0.7693	0.7749	0.582	0.0056
22891	0.09	0.138	AMBTC	W1NN88	W1P3F4	0.9637	0.9406	0.048	-0.0231
22891	0.122	0.523	AMBTC	U5D4D1	W1PJH9	0.838	0.8633	0.401	0.0253
22891	0.122	0.387	AMBTC	U5D4D1	W1PMN5	0.8962	0.8312	0.265	-0.065
22891	0.122	0.357	AMBTC	U5D4D1	W1P392	0.906	0.8312	0.235	-0.0748
22893	0.224	0.467	AMBTC	U5DCY5	U5D4X9	0.8638	0.8593	0.243	-0.0045
22893	0.173	0.234	AMBTC	U5DCY5	U5D3A9	0.9812	0.9788	0.061	-0.0024
22893	0.173	0.226	AMBTC	U5DCY5	U5DC35	0.9804	0.9749	0.053	-0.0055
22893	0.173	0.287	AMBTC	U5DCY5	W1P2L9	0.9358	0.9332	0.114	-0.0026
22893	0.173	0.173	AMBTC	U5DCY5	U5DC32	0.9825	0.979	0	-0.0035
22912	0.111	0.111	AMBTC	U5D2D1	W1PN41	0.9586	0.9752	0	0.0166
22930	0.467	0.686	AMBTC	W1PR35	U5CVY4	0.4209	0.8496	0.219	0.4287
22930	0.467	0.544	AMBTC	W1PR35	W1P1T4	0.5102	0.8496	0.077	0.3394
22932	0.391	0.421	AMBTC	W1NDY3	W1NX93	0.8368	0.7758	0.03	-0.061
22936	0.224	0.409	AMBTC	U5DFY4	U5DJ94	0.7637	0.8227	0.185	0.059
22937	0.568	0.658	AMBTC	W1PVF5	W1PIC3	0.8093	0.7778	0.09	-0.0315
22937	0.78	0.845	AMBTC	W1PVF5	W1PWE9	0.7775	0.8414	0.065	0.0639
22937	0.78	0.939	AMBTC	W1PVF5	W1P9I4	0.8186	0.8414	0.159	0.0228
22942	0.659	0.673	AMBTC	W1NKP5	W1NV31	0.8217	0.8631	0.014	0.0414
22950	0.264	0.273	AMBTC	U5DDQ5	U5D1P6	0.8653	0.6904	0.009	-0.1749
22950	0.33	0.387	AMBTC	U5DDQ5	W1PCC9	0.8838	0.8614	0.057	-0.0224
22950	0.269	0.304	AMBTC	U5DDQ5	W1PDT2	0.9364	0.9177	0.035	-0.0187
22950	0.269	0.35	AMBTC	U5DDQ5	W1PCW4	0.9275	0.9177	0.081	-0.0098
22950	0.269	0.318	AMBTC	U5DDQ5	W1PDL1	0.9411	0.9177	0.049	-0.0234
22951	0.163	0.536	AMBTC	W1NZH0	W1PSA9	0.7614	0.7612	0.373	-0.0002
22951	0.387	0.592	AMBTC	W1PSA9	U5D2M7	0.7935	0.801	0.205	0.0075
22951	0.387	0.517	AMBTC	W1PSA9	W1PTM0	0.8321	0.801	0.13	-0.0311
22951	0.242	0.248	AMBTC	W1NZH0	W1PB16	0.8544	0.8636	0.006	0.0092
22951	0.242	0.256	AMBTC	W1NZH0	W1PYA2	0.8548	0.8636	0.014	0.0088
22952	0.17	0.19	AMBTC	W1NUD8	W1NWE8	0.7647	0.762	0.02	-0.0027
22952	0.151	0.244	AMBTC	W1NUD8	W1NE71	0.6118	0.7074	0.093	0.0956
22952	0.151	0.421	AMBTC	W1NUD8	W1PY53	0.7656	0.6847	0.27	-0.0809
22953	0.412	0.419	AMBTC	U5DBQ9	U5CRL6	0.6951	0.6945	0.007	-0.0006
22953	0.328	0.636	AMBTC	U5DBQ9	W1P2U4	0.7742	0.8044	0.308	0.0302
22953	0.328	0.561	AMBTC	U5DBQ9	W1PSR3	0.9094	0.8097	0.233	-0.0997
22953	0.212	0.246	AMBTC	W1P2U4	U5CYW7	0.9508	0.9355	0.034	-0.0153
22953	0.22	0.233	AMBTC	W1P2U4	W1P0V8	0.9424	0.9355	0.013	-0.0069
22953	0.605	0.614	AMBTC	W1PSR3	W1PXS5	0.8439	0.8566	0.009	0.0127
22953	0.142	0.155	AMBTC	U5CRL6	W1PPI1	0.9196	0.9519	0.013	0.0323
22957	0.242	0.412	AMBTC	U5DI31	U5DBK0	0.6586	0.6092	0.17	-0.0494
22966	0.245	0.326	AMBTC	W1Q0E6	W1PFL4	0.7916	0.7891	0.081	-0.0025
22966	0.245	0.336	AMBTC	W1Q0E6	W1P7B7	0.7246	0.7142	0.091	-0.0104
22996	0.235	0.257	AMBTC	W1PQP5	U5D0L4	0.815	0.7957	0.022	-0.0193
22999	0.541	0.639	AMBTC	U5D5I4	W1NTP2	0.7795	0.802	0.098	0.0225
23001	0.736	0.956	AMBTC	U5DCM3	U5CRW7	0.7158	0.8004	0.22	0.0846
23001	0.057	0.065	AMBTC	U5CRW7	U5D111	0.9205	0.9155	0.008	-0.005
23003	0.524	0.663	AMBTC	W1NU17	W1NIT1	0.7973	0.7923	0.139	-0.005
23012	0.162	0.398	AMBTC	W1NGY8	U5DIE8	0.7184	0.7579	0.236	0.0395
23012	0.162	0.384	AMBTC	W1NGY8	W1NXS1	0.6819	0.7579	0.222	0.076
23023	0.767	0.865	AMBTC	W1PC92	W1NL25	0.6264	0.6438	0.098	0.0174
23023	0.305	0.438	AMBTC	W1PC92	W1PSS4	0.8689	0.857	0.133	-0.0119
23024	0.363	0.728	AMBTC	W1NFS3	W1PT03	0.7528	0.7982	0.365	0.0454
23024	0.363	0.506	AMBTC	W1NFS3	W1NS76	0.7897	0.7982	0.143	0.0085
23024	0.315	0.336	AMBTC	W1NE33	W1NE36	0.8903	0.9171	0.021	0.0268
23024	0.319	0.335	AMBTC	U5D7P6	W1NVV1	0.8093	0.7799	0.016	-0.0294
23024	0.374	0.433	AMBTC	W1NVV1	W1NWN5	0.8348	0.8437	0.059	0.0089
23032	0.379	0.423	AMBTC	W1PRB7	W1P8N2	0.7742	0.7995	0.044	0.0253
23050	0.17	0.595	AMBTC	W1PSL2	U5DCY9	0.6154	0.8397	0.425	0.2243
23050	0.17	0.181	AMBTC	W1PSL2	W1P1N0	0.953	0.8876	0.011	-0.0654
23050	0.17	0.183	AMBTC	W1PSL2	U5CQU6	0.9559	0.8876	0.013	-0.0683
23054	0.549	0.582	AMBTC	W1NZP4	U5CWC9	0.7449	0.6996	0.033	-0.0453
23054	0.549	0.58	AMBTC	W1NZP4	W1PN20	0.7446	0.6996	0.031	-0.045
23056	0.18	0.207	AMBTC	W1P0J0	U5D2A4	0.8044	0.9451	0.027	0.1407
23063	0.601	0.631	AMBTC	W1NM62	U5DAZ7	0.685	0.6318	0.03	-0.0532
23064	0.203	0.563	AMBTC	U5DCC4	W1P2K9	0.7258	0.8489	0.36	0.1231
23070	0.507	0.537	AMBTC	W1PGS7	W1PJX5	0.599	0.6561	0.03	0.0571
23070	0.507	0.55	AMBTC	W1PGS7	W1PIF0	0.6678	0.6561	0.043	-0.0117
23070	0.507	0.543	AMBTC	W1PGS7	W1PJL9	0.6734	0.6561	0.036	-0.0173
23070	0.507	0.586	AMBTC	W1PGS7	W1PT12	0.662	0.6561	0.079	-0.0059
23070	0.292	0.371	AMBTC	W1PIF0	W1PDW4	0.8511	0.8732	0.079	0.0221
23070	0.292	0.339	AMBTC	W1PIF0	W1PJX1	0.8721	0.8732	0.047	0.0011
23070	0.292	0.422	AMBTC	W1PIF0	W1PHF1	0.8661	0.7623	0.13	-0.1038
23070	0.371	0.529	AMBTC	W1PGS7	W1PI44	0.8307	0.846	0.158	0.0153
23070	0.371	0.399	AMBTC	W1PGS7	U5CQB4	0.8631	0.881	0.028	0.0179
23076	0.465	0.486	AMBTC	W1NEV8	W1NT02	0.867	0.9085	0.021	0.0415
23076	0.465	0.733	AMBTC	W1NEV8	W1PCZ6	0.7506	0.8887	0.268	0.1381
23077	0.476	0.501	AMBTC	W1PYU1	W1PZL4	0.8213	0.7968	0.025	-0.0245
23077	0.476	0.915	AMBTC	W1PYU1	U5D081	0.6465	0.7257	0.439	0.0792
23077	0.476	0.909	AMBTC	W1PYU1	U5CNX9	0.6569	0.7257	0.433	0.0688
23077	0.148	0.188	AMBTC	W1PYU1	W1NQS5	0.7966	0.7761	0.04	-0.0205
23079	0.362	0.373	AMBTC	W1PVQ6	W1NRA4	0.8259	0.8349	0.011	0.009
23079	0.318	0.323	AMBTC	W1P1P2	W1P753	0.9001	0.9028	0.005	0.0027
23081	0.568	0.625	AMBTC	W1NZC5	W1P8K8	0.7392	0.64	0.057	-0.0992
23081	0.224	0.277	AMBTC	W1NHH4	W1PRB0	0.8671	0.8279	0.053	-0.0392
23084	0.214	0.264	AMBTC	W1P265	W1PIR6	0.77	0.7173	0.05	-0.0527
23086	0.2	0.33	AMBTC	W1NNP9	W1PMT8	0.7689	0.8081	0.13	0.0392
23086	0.2	0.304	AMBTC	W1NNP9	W1P053	0.779	0.8081	0.104	0.0291
23086	0.2	0.251	AMBTC	W1NNP9	W1NRF6	0.8648	0.8081	0.051	-0.0567
23088	0.161	0.215	AMBTC	W1PU47	W1PU51	0.9596	0.9637	0.054	0.0041
23089	0.128	0.147	AMBTC	W1NTX5	U5DGX8	0.8898	0.8282	0.019	-0.0616
23101	0.356	0.376	AMBTC	W1PJV0	W1NWQ7	0.7759	0.7129	0.02	-0.063
23105	1.073	1.214	AMBTC	W1PP17	W1PFJ7	0.6505	0.7852	0.141	0.1347
23105	0.025	0.041	AMBTC	W1PHW5	W1PAY9	0.9906	0.9753	0.016	-0.0153
23105	0.039	0.048	AMBTC	W1PP17	W1PRY3	0.9792	0.9735	0.009	-0.0057
23111	0.162	0.637	AMBTC	U5D3W9	W1NJ61	0.7317	0.8313	0.475	0.0996
23112	0.296	0.349	AMBTC	W1PTZ4	W1NHK0	0.6255	0.7122	0.053	0.0867
23115	0.49	0.84	AMBTC	U5DC81	W1NZI6	0.7485	0.698	0.35	-0.0505
23115	0.49	0.807	AMBTC	U5DC81	W1NFJ0	0.78	0.7287	0.317	-0.0513
23130	0.361	0.525	AMBTC	W1PWR9	U5D730	0.8291	0.8271	0.164	-0.002
23130	0.361	0.612	AMBTC	W1PWR9	W1NFN8	0.7428	0.8271	0.251	0.0843
23130	0.361	0.5	AMBTC	W1PWR9	U5D7R2	0.7877	0.8271	0.139	0.0394
23137	0.365	0.387	AMBTC	W1NVZ1	W1PVT1	0.6753	0.7084	0.022	0.0331
23138	0.483	0.72	AMBTC	W1NXA2	W1P8B8	0.7961	0.89	0.237	0.0939
23139	0.639	0.804	AMBTC	W1NJ84	U5D811	0.7767	0.7349	0.165	-0.0418
23147	0.315	0.34	AMBTC	U5D163	W1PYF9	0.8283	0.8436	0.025	0.0153
23147	0.046	0.267	AMBTC	W1PJB8	W1NRA2	0.6869	0.7427	0.221	0.0558
23147	0.059	0.077	AMBTC	W1PIQ6	W1PD81	0.8807	0.8422	0.018	-0.0385
23147	0.298	0.366	AMBTC	U5D8B9	U5DD41	0.7313	0.8085	0.068	0.0772
23147	0.074	0.149	AMBTC	W1PQ87	W1NT36	0.8743	0.8634	0.075	-0.0109
23149	0.286	0.346	AMBTC	W1NKU3	W1NLD9	0.7584	0.6979	0.06	-0.0605
23151	0.12	0.138	AMBTC	W1PZ58	W1P030	0.9023	0.9135	0.018	0.0112
23172	0.373	0.461	AMBTC	W1NLX2	W1NHL9	0.7964	0.7891	0.088	-0.0073
23177	0.132	0.183	AMBTC	U5D3M1	W1PY74	0.9399	0.8561	0.051	-0.0838
23177	0.132	0.198	AMBTC	U5D3M1	W1PL31	0.9031	0.8561	0.066	-0.047
23180	0.271	0.379	AMBTC	W1PGK6	W1PNW5	0.8596	0.8338	0.108	-0.0258
23201	0.375	0.422	AMBTC	W1P433	W1NJ06	0.8485	0.9209	0.047	0.0724
23201	0.234	0.234	AMBTC	W1PZM7	U5D1R5	0.9888	0.881	0	-0.1078
23213	0.59	0.779	AMBTC	U5DFP5	U5D7E0	0.5398	0.7683	0.189	0.2285
23213	0.59	0.652	AMBTC	U5DFP5	W1NNT0	0.6149	0.4368	0.062	-0.1781
23213	0.59	0.702	AMBTC	U5DFP5	W1P018	0.6068	0.7559	0.112	0.1491
23213	0.59	0.598	AMBTC	U5DFP5	W1PUD4	0.6216	0.4368	0.008	-0.1848
23222	0.683	0.692	AMBTC	W1PEY8	W1P2C5	0.785	0.7958	0.009	0.0108
23222	0.069	0.158	AMBTC	W1PEY8	U5DBS8	0.9207	0.9351	0.089	0.0144
23236	0.067	0.086	AMBTC	W1NJ38	W1NZG2	0.888	0.8537	0.019	-0.0343
23245	0.248	0.415	AMBTC	W1PWA4	W1NS14	0.7571	0.7437	0.167	-0.0134
23257	0.275	0.331	AMBTC	W1P2N3	W1Q0B3	0.8671	0.8514	0.056	-0.0157
23272	0.521	0.59	AMBTC	W1PZ34	U5D9E5	0.7788	0.8619	0.069	0.0831
23273	0.436	0.559	AMBTC	W1PVB0	W1PII2	0.7765	0.692	0.123	-0.0845
23284	0.616	0.73	AMBTC	W1PDW5	W1P2V7	0.6019	0.6736	0.114	0.0717
23291	0.274	0.322	AMBTC	W1P0N1	W1NIM7	0.9529	0.9343	0.048	-0.0186
23306	0.368	0.382	AMBTC	U5D5G4	U5D8G3	0.9375	0.9522	0.014	0.0147
23309	0.21	0.34	AMBTC	W1P5G0	W1NSF6	0.9457	0.9007	0.13	-0.045
23309	0.172	0.179	AMBTC	W1NSF6	W1NRV5	0.9664	0.9652	0.007	-0.0012
23315	0.354	0.699	AMBTC	W1PKK6	W1NW90	0.6989	0.6095	0.345	-0.0894
23315	0.354	0.434	AMBTC	W1PKK6	W1NRI5	0.7657	0.6932	0.08	-0.0725
23315	0.205	0.257	AMBTC	U5DAG3	W1PBD9	0.866	0.8061	0.052	-0.0599
23315	0.378	0.474	AMBTC	W1PMP7	W1P688	0.821	0.8425	0.096	0.0215
23315	0.378	0.682	AMBTC	W1PMP7	U5D4E5	0.8532	0.8425	0.304	-0.0107
23315	0.378	0.549	AMBTC	W1PMP7	W1PFR5	0.7711	0.8425	0.171	0.0714
23315	0.166	0.301	AMBTC	W1NRI5	W1NZ98	0.8407	0.8657	0.135	0.025
23315	0.166	0.367	AMBTC	W1NRI5	W1NKY1	0.8016	0.9171	0.201	0.1155
23315	0.244	0.321	AMBTC	W1NZ98	W1PWP7	0.7688	0.7601	0.077	-0.0087
23315	0.185	0.486	AMBTC	W1PKK6	U5DCY4	0.8171	0.7264	0.301	-0.0907
23315	0.185	0.466	AMBTC	W1PKK6	W1P4B4	0.8357	0.7264	0.281	-0.1093
23315	0.185	0.779	AMBTC	W1PKK6	W1PIF9	0.7425	0.6932	0.594	-0.0493
23315	0.149	0.206	AMBTC	W1PKK6	U5D8G1	0.79	0.8212	0.057	0.0312
23322	0.63	0.635	AMBTC	U5DFZ4	U5D6Y6	0.8246	0.8167	0.005	-0.0079
23326	0.298	0.358	AMBTC	W1PSI2	W1PEV9	0.8463	0.8556	0.06	0.0093
23326	0.132	0.138	AMBTC	W1PIP6	W1NEI1	0.8704	0.8757	0.006	0.0053
23334	0.328	0.345	AMBTC	W1PVM0	W1PKC1	0.7683	0.7746	0.017	0.0063
23335	0.361	0.635	AMBTC	U5D2P6	U5D8P3	0.7469	0.7342	0.274	-0.0127
23335	0.361	0.487	AMBTC	U5D2P6	W1PQ64	0.7566	0.7283	0.126	-0.0283
23335	0.361	0.397	AMBTC	U5D2P6	W1P4S2	0.8116	0.7808	0.036	-0.0308
23336	0.214	0.39	AMBTC	W1NYP7	W1PEY6	0.8388	0.8367	0.176	-0.0021
23336	0.214	0.289	AMBTC	W1NYP7	W1NLV8	0.8446	0.8367	0.075	-0.0079
23359	0.218	0.339	AMBTC	W1NYF3	W1PEX1	0.8768	0.8995	0.121	0.0227
23359	0.154	0.266	AMBTC	W1NYF3	W1NXI3	0.7968	0.8995	0.112	0.1027
23359	0.153	0.244	AMBTC	U5DC05	W1PK61	0.8973	0.7628	0.091	-0.1345
23359	0.184	0.401	AMBTC	W1PNV9	W1PGZ7	0.702	0.8629	0.217	0.1609
23405	0.214	0.348	AMBTC	W1Q0A3	W1P2J8	0.8407	0.8288	0.134	-0.0119
23406	0.205	0.234	AMBTC	W1NZD6	W1NHB5	0.9286	0.945	0.029	0.0164
23409	0.139	0.166	AMBTC	W1PRN8	W1PX26	0.9366	0.9407	0.027	0.0041
23418	0.113	0.207	AMBTC	W1NV53	W1P0Q3	0.8914	0.952	0.094	0.0606
23421	0.333	0.367	AMBTC	U5D6G3	W1NQB6	0.8635	0.7774	0.034	-0.0861
23421	0.267	0.348	AMBTC	U5D6G3	W1PCA7	0.8826	0.8699	0.081	-0.0127
23421	0.267	0.329	AMBTC	U5D6G3	U5D6S8	0.8869	0.8699	0.062	-0.017
23421	0.267	0.423	AMBTC	U5D6G3	W1NF92	0.8621	0.8699	0.156	0.0078
23421	0.267	0.288	AMBTC	U5D6G3	W1P006	0.8907	0.8699	0.021	-0.0208
23421	0.267	0.315	AMBTC	U5D6G3	W1NFR4	0.8939	0.8699	0.048	-0.024
23421	0.267	0.374	AMBTC	U5D6G3	U5D7F8	0.8739	0.8316	0.107	-0.0423
23421	0.267	0.314	AMBTC	U5D6G3	U5D378	0.8767	0.8699	0.047	-0.0068
23422	0.221	0.286	AMBTC	U5D4T4	W1PJ01	0.948	0.9629	0.065	0.0149
23426	0.321	0.567	AMBTC	W1NQS1	W1NU15	0.7032	0.7343	0.246	0.0311
23426	0.075	0.095	AMBTC	W1P9A8	W1Q0N8	0.8769	0.9163	0.02	0.0394
23428	0.018	0.018	AMBTC	W1P509	W1NET9	0.9359	0.9331	0	-0.0028
23429	0.357	0.432	AMBTC	W1PZ45	W1P8W3	0.8706	0.8599	0.075	-0.0107
23429	0.043	0.05	AMBTC	W1P8W3	U5CWN8	0.9606	0.9475	0.007	-0.0131
23430	0.036	0.073	AMBTC	W1NSS5	U5DAL6	0.9109	0.9349	0.037	0.024
23430	0.018	0.201	AMBTC	W1NSS5	W1PFA3	0.9412	0.9447	0.183	0.0035
23430	0.018	0.037	AMBTC	W1NSS5	U5CYG0	0.9756	0.9832	0.019	0.0076
23430	0.057	0.218	AMBTC	U5D6G0	W1PFY2	0.9595	0.9612	0.161	0.0017
23500	0.252	0.343	AMBTC	W1P752	U5CXD6	0.9172	0.7556	0.091	-0.1616
23500	0.252	0.32	AMBTC	W1P752	W1NY38	0.9414	0.774	0.068	-0.1674
23500	0.186	0.291	AMBTC	U5CXD6	U5D2N5	0.8957	0.9007	0.105	0.005
23500	0.2	0.21	AMBTC	W1NY38	W1NZR3	0.9491	0.7139	0.01	-0.2352
23500	0.239	0.481	AMBTC	W1P752	W1PNM1	0.7651	0.5973	0.242	-0.1678
23500	0.239	0.269	AMBTC	W1P752	W1PQB3	0.8704	0.7669	0.03	-0.1035
23500	0.104	0.287	AMBTC	W1NZP8	U5CXP9	0.919	0.9131	0.183	-0.0059
23500	0.334	0.495	AMBTC	U5CXP9	W1PCB6	0.8239	0.8841	0.161	0.0602
23500	0.338	0.358	AMBTC	U5CW76	W1NIF9	0.8966	0.8492	0.02	-0.0474
23500	0.338	0.35	AMBTC	U5CW76	W1NV61	0.9106	0.8492	0.012	-0.0614
23500	0.165	0.221	AMBTC	W1NIF9	W1NHI3	0.9248	0.9163	0.056	-0.0085
23500	0.165	0.281	AMBTC	W1NIF9	W1PTM2	0.9181	0.9163	0.116	-0.0018
23500	0.241	0.326	AMBTC	U5CW76	W1NGQ0	0.9432	0.9384	0.085	-0.0048
23500	0.241	0.333	AMBTC	U5CW76	W1NFT4	0.9528	0.9384	0.092	-0.0144
23500	0.241	0.247	AMBTC	U5CW76	U5D825	0.943	0.9702	0.006	0.0272
23504	0.374	0.389	AMBTC	W1NU56	W1NRH1	0.8716	0.8956	0.015	0.024
23504	0.374	0.394	AMBTC	W1NU56	W1NP53	0.8917	0.844	0.02	-0.0477
23505	0.511	0.516	AMBTC	W1NG60	U5D566	0.7906	0.6912	0.005	-0.0994
23515	0.203	0.203	AMBTC	W1NYM0	W1P4L1	0.9372	0.8811	0	-0.0561
24006	0.264	0.335	AMBTC	U5D8Z9	W1NUM8	0.7661	0.7877	0.071	0.0216
24006	0.174	0.578	AMBTC	U5D8Z9	W1PGW6	0.7842	0.7877	0.404	0.0035
24006	0.204	0.335	AMBTC	U5D8Z9	W1P2K8	0.8147	0.7804	0.131	-0.0343
24007	0.247	0.3	AMBTC	U5CVV6	U5D688	0.828	0.8438	0.053	0.0158
24009	0.344	0.395	AMBTC	W1NWB2	W1NNF1	0.7141	0.7833	0.051	0.0692
24012	0.158	0.24	AMBTC	W1PA26	U5D311	0.907	0.862	0.082	-0.045
24015	0.566	0.664	AMBTC	W1PN50	W1P9G9	0.8099	0.8274	0.098	0.0175
24015	0.566	0.585	AMBTC	W1PN50	W1PM12	0.7868	0.8274	0.019	0.0406
24015	0.566	0.773	AMBTC	W1PN50	W1NS59	0.8458	0.8274	0.207	-0.0184
24015	0.489	0.614	AMBTC	W1P2Y3	W1NGI1	0.7415	0.8468	0.125	0.1053
24015	0.489	0.741	AMBTC	W1P2Y3	U5D285	0.8047	0.8468	0.252	0.0421
24015	0.489	0.582	AMBTC	W1P2Y3	W1P8Y6	0.6721	0.8468	0.093	0.1747
24015	0.489	0.685	AMBTC	W1P2Y3	W1P3G6	0.7579	0.8468	0.196	0.0889
24015	0.489	0.657	AMBTC	W1P2Y3	U5CZ16	0.7688	0.8468	0.168	0.078
24015	0.489	0.767	AMBTC	W1P2Y3	W1NN85	0.8045	0.8468	0.278	0.0423
24015	0.489	0.503	AMBTC	W1P2Y3	W1NF71	0.7585	0.8468	0.014	0.0883
24015	0.489	0.633	AMBTC	W1P2Y3	W1NIR6	0.7672	0.8468	0.144	0.0796
24015	0.489	0.615	AMBTC	W1P2Y3	U5DA01	0.7816	0.8468	0.126	0.0652
24015	0.489	0.634	AMBTC	W1P2Y3	W1P8W4	0.7491	0.8468	0.145	0.0977
24015	0.489	0.656	AMBTC	W1P2Y3	W1P590	0.7172	0.8468	0.167	0.1296
24015	0.489	0.624	AMBTC	W1P2Y3	U5DC37	0.7813	0.8468	0.135	0.0655
24015	0.489	0.571	AMBTC	W1P2Y3	U5CZK2	0.7864	0.8468	0.082	0.0604
24015	0.489	0.7	AMBTC	W1P2Y3	U5D6A9	0.76	0.8468	0.211	0.0868
24015	0.489	0.534	AMBTC	W1P2Y3	W1PNX0	0.7966	0.8468	0.045	0.0502
24015	0.489	0.74	AMBTC	W1P2Y3	W1NL50	0.7	0.8468	0.251	0.1468
24015	0.489	0.62	AMBTC	W1P2Y3	W1NLK8	0.7407	0.8468	0.131	0.1061
24015	0.489	0.602	AMBTC	W1P2Y3	W1NHQ9	0.7392	0.8468	0.113	0.1076
24015	0.489	0.756	AMBTC	W1P2Y3	U5DIG2	0.7783	0.8468	0.267	0.0685
24015	0.489	0.628	AMBTC	W1P2Y3	W1NY76	0.7447	0.8468	0.139	0.1021
24015	0.489	0.597	AMBTC	W1P2Y3	W1NGX3	0.7417	0.8468	0.108	0.1051
24015	0.489	0.61	AMBTC	W1P2Y3	W1P7X0	0.8207	0.8468	0.121	0.0261
24015	0.489	0.584	AMBTC	W1P2Y3	W1NPK0	0.7884	0.8468	0.095	0.0584
24015	0.489	0.652	AMBTC	W1P2Y3	U5D328	0.7499	0.8468	0.163	0.0969
24015	0.489	0.73	AMBTC	W1P2Y3	W1NFX4	0.7755	0.8468	0.241	0.0713
24015	0.489	0.705	AMBTC	W1P2Y3	W1PGA7	0.761	0.8468	0.216	0.0858
24015	0.489	0.632	AMBTC	W1P2Y3	W1P9T1	0.679	0.8468	0.143	0.1678
24015	0.489	0.825	AMBTC	W1P2Y3	W1NJS9	0.7847	0.8468	0.336	0.0621
24015	0.489	0.615	AMBTC	W1P2Y3	W1PZ55	0.7168	0.8468	0.126	0.13
24015	0.489	0.524	AMBTC	W1P2Y3	W1P844	0.7744	0.8468	0.035	0.0724
24015	0.489	0.652	AMBTC	W1P2Y3	W1NES9	0.8109	0.8468	0.163	0.0359
24015	0.489	0.685	AMBTC	W1P2Y3	W1P1B2	0.7422	0.8468	0.196	0.1046
24015	0.489	0.629	AMBTC	W1P2Y3	W1NJR2	0.7535	0.8468	0.14	0.0933
24015	0.489	0.69	AMBTC	W1P2Y3	W1PJQ9	0.8045	0.8468	0.201	0.0423
24015	0.489	0.73	AMBTC	W1P2Y3	W1NRM7	0.7711	0.8468	0.241	0.0757
24015	0.489	0.676	AMBTC	W1P2Y3	W1NL69	0.8166	0.8468	0.187	0.0302
24015	0.489	0.585	AMBTC	W1P2Y3	W1PUK6	0.7935	0.8468	0.096	0.0533
24015	0.489	0.75	AMBTC	W1P2Y3	W1NDX2	0.8037	0.8468	0.261	0.0431
24015	0.489	0.675	AMBTC	W1P2Y3	W1NR80	0.7556	0.8468	0.186	0.0912
24031	0.101	0.171	AMBTC	W1NUR9	U5DGF7	0.7995	0.8987	0.07	0.0992
24031	0.285	0.324	AMBTC	W1NXC2	W1NJ14	0.8596	0.8356	0.039	-0.024
24034	0.159	0.209	AMBTC	W1P9B0	U5D3I1	0.9408	0.9344	0.05	-0.0064
24054	0.042	0.042	AMBTC	W1NDW2	W1P7T9	0.995	0.9532	0	-0.0418
24055	0.36	0.368	AMBTC	W1PW82	W1NKX0	0.8274	0.7678	0.008	-0.0596
24055	0.04	0.052	AMBTC	W1PW82	W1PUE3	0.844	0.9107	0.012	0.0667
24055	0.15	0.205	AMBTC	W1NKX0	W1PGG6	0.9547	0.9303	0.055	-0.0244
24055	0.15	0.167	AMBTC	W1NKX0	W1NKH8	0.967	0.954	0.017	-0.013
24055	0.128	0.187	AMBTC	W1PGG6	W1NKQ3	0.9358	0.9473	0.059	0.0115
24055	0.131	0.348	AMBTC	W1NKX0	W1NMI0	0.854	0.8562	0.217	0.0022
24055	0.131	0.191	AMBTC	W1NKX0	W1NMI1	0.9121	0.8562	0.06	-0.0559
24056	0.322	0.334	AMBTC	W1P377	W1PL96	0.8003	0.8514	0.012	0.0511
24056	0.06	0.092	AMBTC	W1P377	U5CL22	0.9298	0.9236	0.032	-0.0062
24056	0.026	0.026	AMBTC	W1PL96	W1PIG3	0.961	0.97	0	0.009
24056	0.269	0.41	AMBTC	U5D076	U5CUE2	0.766	0.8466	0.141	0.0806
24056	0.036	0.041	AMBTC	U5CUE2	U5DD83	0.876	0.8659	0.005	-0.0101
24056	0.04	0.072	AMBTC	U5CUE2	W1P8P5	0.9091	0.8241	0.032	-0.085
24056	0.074	0.252	AMBTC	U5DD83	U5D925	0.8362	0.8687	0.178	0.0325
24056	0.074	0.241	AMBTC	U5DD83	W1PHD0	0.8356	0.8687	0.167	0.0331
24056	0.074	0.099	AMBTC	U5DD83	W1NVN4	0.8736	0.8687	0.025	-0.0049
24056	0.094	0.321	AMBTC	W1PHD0	U5CZC0	0.7858	0.8748	0.227	0.089
24057	0.056	0.128	AMBTC	W1P3A3	W1NTC3	0.8929	0.9285	0.072	0.0356
24057	0.056	0.059	AMBTC	W1P3A3	W1PHE8	0.913	0.9285	0.003	0.0155
24057	0.056	0.096	AMBTC	W1P3A3	U5DHR5	0.9044	0.9285	0.04	0.0241
24057	0.057	0.081	AMBTC	W1P3A3	W1P0A5	0.9742	0.9572	0.024	-0.017
24064	0.15	0.23	AMBTC	W1NHD1	W1NVV6	0.9112	0.916	0.08	0.0048
24064	0.15	0.187	AMBTC	W1NHD1	W1P8I1	0.9146	0.916	0.037	0.0014
24064	0.101	0.101	AMBTC	W1NHD1	W1NI53	0.9008	0.9502	0	0.0494
24067	0.016	0.024	AMBTC	W1P1V9	W1NDY9	0.9981	0.9905	0.008	-0.0076
24067	0.025	0.125	AMBTC	W1PII4	W1P704	0.9895	0.9012	0.1	-0.0883
24068	0	0	AMBTC	W1P8J1	W1PUG2	1	0.9975	0	-0.0025
24068	0.011	0.011	AMBTC	W1P8J1	W1P2L3	1	0.9995	0	-0.0005
24068	0.011	0.057	AMBTC	W1PUG2	W1PMT5	0.9837	0.9998	0.046	0.0161
24068	0.011	0.036	AMBTC	U5CXH1	W1NVJ4	0.989	0.9697	0.025	-0.0193
24068	0.011	0.011	AMBTC	U5CXH1	W1PX48	0.9929	0.9697	0	-0.0232
24068	0.093	0.127	AMBTC	W1NHJ8	U5CWS0	0.9176	0.9609	0.034	0.0433
24068	0.056	0.144	AMBTC	W1PDY0	W1NEC3	0.928	0.9649	0.088	0.0369
24068	0.041	0.112	AMBTC	W1PDY0	U5D186	0.9985	0.9742	0.071	-0.0243
24068	0.145	0.171	AMBTC	W1PWM7	W1PBP9	0.9426	0.9471	0.026	0.0045
24071	0.039	0.043	AMBTC	W1PEZ6	W1P9A4	0.9635	0.9204	0.004	-0.0431
24071	0.039	0.044	AMBTC	W1PEZ6	W1NHH6	0.9521	0.9204	0.005	-0.0317
24072	0.014	0.014	AMBTC	W1PVF0	W1PL29	0.9707	0.9716	0	0.0009
24073	0.149	0.189	AMBTC	U5D6L1	W1NRB8	0.9213	0.9804	0.04	0.0591
24073	0.075	0.237	AMBTC	U5D6L1	W1PN13	0.9493	0.9776	0.162	0.0283
24078	0.193	0.591	AMBTC	W1P0A6	W1PLY7	0.8764	0.7673	0.398	-0.1091
24078	0.234	0.324	AMBTC	W1P0A6	W1PEK9	0.8995	0.8794	0.09	-0.0201
24089	0.494	0.695	AMBTC	W1PNX4	W1PRD6	0.7443	0.6333	0.201	-0.111
24089	0.308	0.329	AMBTC	W1NDY0	U5CZR8	0.8658	0.7586	0.021	-0.1072
24089	0.166	0.449	AMBTC	W1P0B3	W1PX50	0.7272	0.7845	0.283	0.0573
24089	0.281	0.281	AMBTC	W1NV58	U5CZC5	0.8963	0.9033	0	0.007
24093	0.223	0.244	AMBTC	W1PB71	W1PLL0	0.8928	0.8749	0.021	-0.0179
24096	0.168	0.169	AMBTC	W1PH53	U5D2C7	0.9226	0.8794	0.001	-0.0432
24096	0.498	0.56	AMBTC	W1PZ89	U5CQV7	0.7682	0.7799	0.062	0.0117
24096	0.498	0.523	AMBTC	W1PZ89	W1NKP7	0.7888	0.6959	0.025	-0.0929
24096	0.498	0.554	AMBTC	W1PZ89	W1PUD6	0.709	0.6959	0.056	-0.0131
24096	0.264	0.279	AMBTC	W1NKP7	W1NMB8	0.9112	0.8747	0.015	-0.0365
24115	0.46	0.669	AMBTC	W1PUG1	U5D1E8	0.7964	0.8349	0.209	0.0385
24115	0.312	0.45	AMBTC	W1P3T7	W1Q059	0.7368	0.7078	0.138	-0.029
24115	0.17	0.334	AMBTC	W1Q059	W1P9X0	0.8826	0.8922	0.164	0.0096
24115	0.355	0.56	AMBTC	W1PD52	W1NIG7	0.7227	0.7042	0.205	-0.0185
24128	0.294	0.336	AMBTC	W1PHL9	U5D100	0.8275	0.8501	0.042	0.0226
24206	0.225	0.313	AMBTC	W1NVD0	W1NIS4	0.8583	0.9132	0.088	0.0549
24206	0.225	0.273	AMBTC	W1NVD0	U5CZ69	0.8801	0.9132	0.048	0.0331
24206	0.225	0.266	AMBTC	W1NVD0	W1PQZ3	0.8384	0.9132	0.041	0.0748
24209	0.188	0.192	AMBTC	W1PVA9	U5CWB4	0.8705	0.873	0.004	0.0025
24221	0.3	0.593	AMBTC	W1NVP6	W1PZT2	0.882	0.796	0.293	-0.086
24282	0.353	0.744	AMBTC	U5D813	W1P012	0.8318	0.7207	0.391	-0.1111
24282	0.353	0.781	AMBTC	U5D813	W1P1Z3	0.8538	0.7207	0.428	-0.1331
24282	0.352	0.429	AMBTC	W1NQF0	W1P1M7	0.9045	0.9091	0.077	0.0046
24282	0.352	0.422	AMBTC	W1NQF0	W1NSY8	0.9144	0.9091	0.07	-0.0053
24282	0.352	0.372	AMBTC	W1NQF0	W1NR52	0.932	0.9091	0.02	-0.0229
24286	0.204	0.205	AMBTC	W1PC10	U5D5E4	0.8433	0.8464	0.001	0.0031
24286	0.361	0.368	AMBTC	W1PC10	W1PCP2	0.9154	0.9068	0.007	-0.0086
24286	0.679	0.702	AMBTC	U5D5I0	W1PNA0	0.8107	0.7292	0.023	-0.0815
24286	0.651	0.743	AMBTC	W1PII6	U5DB53	0.7871	0.7233	0.092	-0.0638
24286	0.651	0.799	AMBTC	W1PII6	U5DD47	0.7531	0.7233	0.148	-0.0298
24286	0.651	0.785	AMBTC	W1PII6	U5D5Z8	0.7756	0.7233	0.134	-0.0523
24286	0.35	0.391	AMBTC	U5DB53	W1P134	0.8865	0.8541	0.041	-0.0324
24286	0.195	0.195	AMBTC	U5D5Z8	U5D6J0	0.9177	0.8572	0	-0.0605
24286	0.301	0.5	AMBTC	W1PNA0	W1P132	0.8054	0.7462	0.199	-0.0592
24286	0.59	0.602	AMBTC	U5D5I0	U5DCG5	0.8309	0.7836	0.012	-0.0473
24286	0.398	0.542	AMBTC	W1Q032	W1P2V0	0.7754	0.8321	0.144	0.0567
24286	0.398	0.511	AMBTC	W1Q032	U5DBR3	0.7753	0.8321	0.113	0.0568
24286	0.398	0.484	AMBTC	W1Q032	W1NNF5	0.7837	0.8321	0.086	0.0484
24286	0.501	0.517	AMBTC	W1Q032	W1Q0U8	0.8618	0.8203	0.016	-0.0415
24286	0.501	0.512	AMBTC	W1Q032	W1PZV5	0.8916	0.8379	0.011	-0.0537
24286	0.501	0.506	AMBTC	W1Q032	W1PUM0	0.88	0.8379	0.005	-0.0421
24286	0.501	0.533	AMBTC	W1Q032	W1PZV3	0.8536	0.8321	0.032	-0.0215
24286	0.501	0.528	AMBTC	W1Q032	W1PZB6	0.8762	0.8379	0.027	-0.0383
24286	0.273	0.282	AMBTC	W1NH38	W1PJU5	0.9053	0.9046	0.009	-0.0007
24286	0.273	0.293	AMBTC	W1NH38	W1NTB6	0.8946	0.9046	0.02	0.01
24291	0.164	0.21	AMBTC	W1P1A0	U5D0Z2	0.9487	0.8612	0.046	-0.0875
24296	0.48	0.48	AMBTC	W1NGD3	W1NUU9	0.7213	0.6407	0	-0.0806
24296	0.251	0.357	AMBTC	W1NGD3	U5DAA2	0.813	0.8292	0.106	0.0162
24296	0.251	0.393	AMBTC	W1NGD3	U5DAD1	0.788	0.8137	0.142	0.0257
24296	0.36	0.38	AMBTC	W1NUU9	W1PXV1	0.8809	0.7552	0.02	-0.1257
24296	0.36	0.392	AMBTC	W1NUU9	W1NUV0	0.8556	0.7552	0.032	-0.1004
24296	0.36	0.385	AMBTC	W1NUU9	W1PJ05	0.8319	0.7552	0.025	-0.0767
24296	0.452	0.662	AMBTC	W1NID9	W1NKY2	0.7874	0.7183	0.21	-0.0691
24296	0.452	0.512	AMBTC	W1NID9	W1PRR6	0.8323	0.7183	0.06	-0.114
24296	0.452	0.48	AMBTC	W1NID9	W1PNP8	0.8573	0.8267	0.028	-0.0306
24296	0.696	0.707	AMBTC	W1NKY2	W1NDG9	0.8328	0.8135	0.011	-0.0193
24296	0.696	0.707	AMBTC	W1NKY2	U5DDY6	0.8018	0.7853	0.011	-0.0165
24296	0.696	0.719	AMBTC	W1NKY2	W1NK50	0.5872	0.7516	0.023	0.1644
24296	0.287	0.354	AMBTC	W1PRR6	W1PTD2	0.8131	0.8789	0.067	0.0658
24299	0.318	0.71	AMBTC	W1NZJ8	W1NMQ3	0.7055	0.7493	0.392	0.0438
24320	0.392	0.432	AMBTC	W1NQK7	W1NGS1	0.8619	0.7778	0.04	-0.0841
24320	0.197	0.24	AMBTC	W1NHL6	W1NIE4	0.9479	0.9143	0.043	-0.0336
24320	0.246	0.484	AMBTC	W1PJC0	W1NXE0	0.848	0.798	0.238	-0.05
24326	0.084	0.122	AMBTC	W1P1R9	W1NIU7	0.8183	0.8217	0.038	0.0034
24326	0.306	0.52	AMBTC	W1P1R9	U5D5T9	0.8534	0.8311	0.214	-0.0223
24326	0.306	0.398	AMBTC	W1P1R9	W1NGU8	0.8681	0.8311	0.092	-0.037
24326	0.306	0.5	AMBTC	W1P1R9	W1PL75	0.8585	0.8311	0.194	-0.0274
24326	0.306	0.316	AMBTC	W1P1R9	W1PDW9	0.8303	0.8311	0.01	0.0008
24326	0.394	0.692	AMBTC	W1P1R9	W1Q052	0.805	0.8217	0.298	0.0167
24326	0.394	0.468	AMBTC	W1P1R9	W1NU60	0.8208	0.8494	0.074	0.0286
24343	0.079	0.35	AMBTC	W1NU23	W1PED4	0.8273	0.7726	0.271	-0.0547
24343	0.075	0.118	AMBTC	W1NNK5	W1PLN2	0.888	0.8374	0.043	-0.0506
24343	0.075	0.095	AMBTC	W1NNK5	U5CZ56	0.8708	0.8374	0.02	-0.0334
24343	0.068	0.068	AMBTC	W1NNK5	W1P0C0	0.8938	0.876	0	-0.0178
24348	0.257	0.37	AMBTC	U5D660	W1NHP2	0.7853	0.7351	0.113	-0.0502
24348	0.169	0.189	AMBTC	W1PK13	W1NMW7	0.8284	0.8512	0.02	0.0228
24349	0.453	0.603	AMBTC	W1PZD8	W1PI04	0.7417	0.7003	0.15	-0.0414
24349	0.301	0.321	AMBTC	W1PZD8	W1PJR2	0.6983	0.6743	0.02	-0.024
24349	0.039	0.058	AMBTC	W1PJR2	W1NNK0	0.9168	0.8044	0.019	-0.1124
24349	0.103	0.218	AMBTC	W1PI04	W1P146	0.781	0.848	0.115	0.067
24349	0.133	0.175	AMBTC	W1P146	W1PCB9	0.9047	0.8493	0.042	-0.0554
24349	0.133	0.173	AMBTC	W1P146	W1NZV6	0.873	0.8493	0.04	-0.0237
24349	0.177	0.188	AMBTC	W1PI04	U5DAC8	0.9054	0.848	0.011	-0.0574
24349	0.177	0.188	AMBTC	W1PI04	W1PSD6	0.8738	0.8981	0.011	0.0243
24349	0.177	0.178	AMBTC	W1PI04	W1NL75	0.8896	0.9005	0.001	0.0109
24349	0.084	0.27	AMBTC	W1PI04	W1NGM2	0.8893	0.9062	0.186	0.0169
24349	0.134	0.138	AMBTC	W1NE61	U5D4H5	0.8994	0.8581	0.004	-0.0413
24349	0.134	0.152	AMBTC	W1NE61	W1PLD0	0.895	0.8581	0.018	-0.0369
24350	0.108	0.252	AMBTC	U5CPW7	U5D1H0	0.9444	0.9802	0.144	0.0358
24356	0.12	0.145	AMBTC	U5CX69	W1PAZ4	0.8261	0.8756	0.025	0.0495
24361	0.17	0.21	AMBTC	W1P4Q7	U5CPT4	0.8135	0.8456	0.04	0.0321
24414	0.667	0.832	AMBTC	W1P3Q2	W1P3D3	0.6578	0.7671	0.165	0.1093
24414	0.545	0.61	AMBTC	W1P3Q2	W1P0Y0	0.8585	0.8146	0.065	-0.0439
24414	0.406	0.772	AMBTC	W1NES1	W1PI28	0.6465	0.8491	0.366	0.2026
24414	0.406	0.746	AMBTC	W1NES1	W1NGQ3	0.634	0.8491	0.34	0.2151
26312	0.694	0.71	AMBTC	W1PA43	W1P7S1	0.7083	0.8838	0.016	0.1755
27000	0.666	0.764	AMBTC	W1NM67	U5DCV8	0.7259	0.7366	0.098	0.0107
27000	0.666	0.838	AMBTC	W1NM67	W1NZV5	0.6878	0.7366	0.172	0.0488
27000	0.666	0.834	AMBTC	W1NM67	U5D1H2	0.7354	0.7366	0.168	0.0012
27000	0.666	0.726	AMBTC	W1NM67	U5CYF2	0.6737	0.7366	0.06	0.0629
27000	0.666	0.717	AMBTC	W1NM67	W1PNX7	0.7396	0.7366	0.051	-0.003
27000	0.666	0.761	AMBTC	W1NM67	W1PXU7	0.7005	0.7366	0.095	0.0361
27000	0.666	0.75	AMBTC	W1NM67	U5CVR4	0.7257	0.7366	0.084	0.0109
27000	0.666	0.734	AMBTC	W1NM67	W1PVJ4	0.7652	0.7366	0.068	-0.0286
27000	0.666	0.896	AMBTC	W1NM67	W1PRC1	0.6041	0.7366	0.23	0.1325
27000	0.666	0.741	AMBTC	W1NM67	U5D2T2	0.8008	0.7366	0.075	-0.0642
27001	0.556	0.711	AMBTC	W1NJK9	W1P557	0.6734	0.5807	0.155	-0.0927
27001	0.556	0.687	AMBTC	W1NJK9	W1PL27	0.6002	0.5583	0.131	-0.0419
27001	0.315	0.321	AMBTC	W1PC36	W1PM45	0.7966	0.7985	0.006	0.0019
27001	0.37	0.377	AMBTC	W1P557	W1PQM3	0.7257	0.7733	0.007	0.0476
27002	0.233	0.293	AMBTC	W1PS15	U5CZI6	0.7617	0.7824	0.06	0.0207
27003	0.059	0.112	AMBTC	W1P316	W1NVJ9	0.824	0.8322	0.053	0.0082
27003	0.152	0.172	AMBTC	W1P316	W1PAH5	0.7932	0.8023	0.02	0.0091
27003	0.152	0.214	AMBTC	W1P316	W1P990	0.7677	0.8322	0.062	0.0645
27003	0.152	0.171	AMBTC	W1P316	W1PUN5	0.7801	0.8322	0.019	0.0521
27003	0.152	0.152	AMBTC	W1P316	W1P687	0.7915	0.8023	0	0.0108
27003	0.108	0.214	AMBTC	W1PAH5	W1NLN9	0.8077	0.879	0.106	0.0713
27003	0.108	0.167	AMBTC	W1PAH5	W1NKV1	0.828	0.879	0.059	0.051
27003	0.077	0.098	AMBTC	W1P990	W1PFE5	0.8609	0.8597	0.021	-0.0012
27004	0.436	0.515	AMBTC	W1NJW1	W1NIJ5	0.3887	0.6029	0.079	0.2142
27004	0.436	0.625	AMBTC	W1NJW1	W1PUN9	0.4841	0.4115	0.189	-0.0726
27004	0.436	0.536	AMBTC	W1NJW1	W1NI09	0.5905	0.3737	0.1	-0.2168
27004	0.436	0.625	AMBTC	W1NJW1	W1NNM9	0.5294	0.3737	0.189	-0.1557
27004	0.436	0.625	AMBTC	W1NJW1	U5DBP6	0.4881	0.3737	0.189	-0.1144
27004	0.436	0.602	AMBTC	W1NJW1	W1NIP8	0.6053	0.6029	0.166	-0.0024
27004	0.436	0.602	AMBTC	W1NJW1	W1NHM4	0.4723	0.3737	0.166	-0.0986
27004	0.436	0.697	AMBTC	W1NJW1	W1NIU9	0.6178	0.3737	0.261	-0.2441
27004	0.436	0.557	AMBTC	W1NJW1	U5D1B3	0.5358	0.6029	0.121	0.0671
27004	0.436	0.475	AMBTC	W1NJW1	W1NKI7	0.5005	0.4115	0.039	-0.089
27004	0.436	0.455	AMBTC	W1NJW1	W1NJW6	0.5635	0.4115	0.019	-0.152
27005	0.365	0.395	AMBTC	W1P084	U5D8C2	0.8211	0.6301	0.03	-0.191
27005	0.268	0.459	AMBTC	W1P084	W1PW09	0.6823	0.826	0.191	0.1437
27005	0.216	0.394	AMBTC	W1PW09	W1PVU4	0.8498	0.85	0.178	0.0002
27005	0.216	0.258	AMBTC	W1PW09	W1PUN2	0.8531	0.85	0.042	-0.0031
27007	0.345	0.441	AMBTC	W1PDH2	W1PUU9	0.7511	0.6284	0.096	-0.1227
27007	0.345	0.742	AMBTC	W1PDH2	W1P4E2	0.7263	0.6284	0.397	-0.0979
27007	0.345	0.437	AMBTC	W1PDH2	U5DG95	0.7086	0.6284	0.092	-0.0802
27007	0.266	0.344	AMBTC	W1PUU9	W1PZI1	0.843	0.8689	0.078	0.0259
27007	0.266	0.359	AMBTC	W1PUU9	W1Q004	0.8381	0.8689	0.093	0.0308
27007	0.282	0.3	AMBTC	U5DG95	U5D4G5	0.8387	0.8592	0.018	0.0205
27007	0.263	0.268	AMBTC	W1PDH2	W1PLI1	0.8834	0.8675	0.005	-0.0159
27007	0.263	0.274	AMBTC	W1PDH2	W1PR09	0.8742	0.8196	0.011	-0.0546
27007	0.263	0.437	AMBTC	W1PDH2	W1PJS1	0.8346	0.8238	0.174	-0.0108
27007	0.263	0.302	AMBTC	W1PDH2	W1PJT2	0.8285	0.8238	0.039	-0.0047
27007	0.263	0.313	AMBTC	W1PDH2	W1PJZ1	0.8403	0.8238	0.05	-0.0165
27007	0.263	0.279	AMBTC	W1PDH2	W1PJ13	0.854	0.8196	0.016	-0.0344
27007	0.263	0.291	AMBTC	W1PDH2	W1PLG6	0.8582	0.8306	0.028	-0.0276
27007	0.263	0.274	AMBTC	W1PDH2	W1PLH6	0.8816	0.8306	0.011	-0.051
27007	0.263	0.386	AMBTC	W1PDH2	W1PDH5	0.8924	0.8365	0.123	-0.0559
27007	0.263	0.405	AMBTC	W1PDH2	W1PDH8	0.8535	0.8238	0.142	-0.0297
27007	0.263	0.392	AMBTC	W1PDH2	W1PJ08	0.8601	0.8238	0.129	-0.0363
27007	0.263	0.285	AMBTC	W1PDH2	W1PDI2	0.7896	0.7568	0.022	-0.0328
27007	0.364	0.407	AMBTC	W1NQV2	U5DFQ4	0.8403	0.7432	0.043	-0.0971
27007	0.364	0.389	AMBTC	W1NQV2	U5CXK9	0.7895	0.7432	0.025	-0.0463
27007	0.364	0.663	AMBTC	W1NQV2	W1P6Z1	0.7476	0.7432	0.299	-0.0044
27007	0.364	0.44	AMBTC	W1NQV2	W1PUN8	0.7635	0.7432	0.076	-0.0203
27007	0.364	0.451	AMBTC	W1NQV2	W1NT12	0.72	0.7432	0.087	0.0232
27007	0.147	0.214	AMBTC	U5CXK9	U5DCD1	0.8518	0.8542	0.067	0.0024
27007	0.147	0.176	AMBTC	U5CXK9	U5D762	0.8583	0.8721	0.029	0.0138
27007	0.147	0.147	AMBTC	U5CXK9	U5D9F9	0.8516	0.8721	0	0.0205
27007	0.147	0.191	AMBTC	U5CXK9	U5CWT3	0.9038	0.848	0.044	-0.0558
27009	0.284	0.289	AMBTC	W1P2I1	W1P4G2	0.864	0.8546	0.005	-0.0094
27009	0.284	0.289	AMBTC	W1P2I1	W1NN53	0.8752	0.8537	0.005	-0.0215
27009	0.284	0.284	AMBTC	W1P2I1	W1NXX1	0.8743	0.8537	0	-0.0206
28018	0.337	0.454	AMBTC	W1P841	W1P5N2	0.7291	0.8207	0.117	0.0916
28039	0.448	0.73	AMBTC	W1PWU2	W1PVV8	0.861	0.9209	0.282	0.0599
28039	0.448	0.693	AMBTC	W1PWU2	W1PQA8	0.8578	0.9209	0.245	0.0631
28242	0.244	0.456	AMBTC	W1NNW6	U5CYW2	0.9152	0.916	0.212	0.0008
28242	0.244	0.631	AMBTC	W1NNW6	W1P816	0.8569	0.916	0.387	0.0591
28242	0.244	0.467	AMBTC	W1NNW6	W1PXX0	0.8264	0.92	0.223	0.0936
28637	0.78	0.834	AMBTC	W1NGJ2	W1PJU4	0.8148	0.8152	0.054	0.0004
30031	0.032	0.161	AMBTC	U5D1D0	W1PVV2	0.9331	0.9151	0.129	-0.018
30031	0.032	0.089	AMBTC	U5D1D0	W1PVU6	0.8999	0.8562	0.057	-0.0437
30031	0.032	0.099	AMBTC	U5D1D0	W1PLN9	0.8716	0.8484	0.067	-0.0232
30314	0.152	0.207	AMBTC	W1PJX4	W1P236	0.9248	0.9138	0.055	-0.011
30457	0.425	0.477	AMBTC	U5DIG7	U5CZB3	0.8261	0.7883	0.052	-0.0378
30519	0.096	0.167	AMBTC	W1NDZ4	W1P812	0.9822	0.9729	0.071	-0.0093
30540	0.365	0.398	AMBTC	W1PGW3	W1NQ22	0.8265	0.6963	0.033	-0.1302
30540	0.365	0.445	AMBTC	W1PGW3	W1PM26	0.8442	0.6963	0.08	-0.1479
30540	0.365	0.391	AMBTC	W1PGW3	W1PGI6	0.806	0.6963	0.026	-0.1097
30540	0.336	0.384	AMBTC	W1PM26	W1PUF9	0.8581	0.8577	0.048	-0.0004
30540	0.389	0.423	AMBTC	W1NXS5	W1PUK7	0.8757	0.8712	0.034	-0.0045
30540	0.1	0.186	AMBTC	W1NXS5	W1PGV1	0.8871	0.8712	0.086	-0.0159
30540	0.319	0.349	AMBTC	W1PGI6	W1PEG4	0.8707	0.8771	0.03	0.0064
30540	0.319	0.411	AMBTC	W1PGI6	U5CUH8	0.8994	0.8771	0.092	-0.0223
30540	0.248	0.326	AMBTC	W1PGW3	W1PE71	0.9128	0.8683	0.078	-0.0445
30540	0.248	0.375	AMBTC	W1PGW3	W1PCF5	0.9017	0.8683	0.127	-0.0334
30540	0.248	0.292	AMBTC	W1PGW3	W1PCA1	0.9022	0.8683	0.044	-0.0339
30540	0.248	0.442	AMBTC	W1PGW3	W1PMX3	0.8462	0.7841	0.194	-0.0621
30540	0.131	0.133	AMBTC	W1PGW3	U5CUF8	0.9356	0.9266	0.002	-0.009
30546	0.266	0.342	AMBTC	W1PY03	W1NDV8	0.9515	0.8691	0.076	-0.0824
30546	0.133	0.27	AMBTC	W1PY03	W1PFQ0	0.9414	0.953	0.137	0.0116
30612	0.172	0.361	AMBTC	W1P303	W1PFK3	0.8105	0.8867	0.189	0.0762
30620	0.246	0.304	AMBTC	W1NE16	W1PPJ1	0.9575	0.9441	0.058	-0.0134
30620	0.252	0.289	AMBTC	W1NE16	W1NE06	0.9702	0.97	0.037	-0.0002
31003	0.246	0.285	AMBTC	U5CWT6	W1NMG1	0.8144	0.7891	0.039	-0.0253
31003	0.302	0.383	AMBTC	W1NMG1	W1NSQ5	0.8047	0.8014	0.081	-0.0033
31009	0.497	0.575	AMBTC	W1NHF8	W1PNB8	0.8764	0.8689	0.078	-0.0075
31009	0.497	0.504	AMBTC	W1NHF8	U5D0V3	0.8584	0.8705	0.007	0.0121
31009	0.497	0.582	AMBTC	W1NHF8	W1PGE4	0.8598	0.8705	0.085	0.0107
31009	0.497	0.553	AMBTC	W1NHF8	W1NGL4	0.883	0.8893	0.056	0.0063
31009	0.497	0.56	AMBTC	W1NHF8	U5DA47	0.8649	0.8705	0.063	0.0056
31009	0.497	0.651	AMBTC	W1NHF8	W1NFR3	0.8616	0.8689	0.154	0.0073
31009	0.497	0.553	AMBTC	W1NHF8	W1PZL5	0.8645	0.8689	0.056	0.0044
31009	0.497	0.524	AMBTC	W1NHF8	U5DCV1	0.8687	0.8893	0.027	0.0206
31016	0.712	0.788	AMBTC	W1P346	W1NIV0	0.673	0.7763	0.076	0.1033
31033	0.36	0.379	AMBTC	U5CZR3	W1NKL8	0.7366	0.7968	0.019	0.0602
31042	0.334	0.406	AMBTC	U5D1V9	W1NWL6	0.8816	0.893	0.072	0.0114
31042	0.334	0.381	AMBTC	U5D1V9	W1P8V1	0.8701	0.893	0.047	0.0229
31044	0.345	0.552	AMBTC	W1P582	W1NSD1	0.9054	0.6809	0.207	-0.2245
31044	0.345	0.445	AMBTC	W1P582	W1NV41	0.8178	0.6809	0.1	-0.1369
31044	0.345	0.519	AMBTC	W1P582	W1PSC8	0.8622	0.6809	0.174	-0.1813
31044	0.345	0.605	AMBTC	W1P582	W1PZV1	0.741	0.6809	0.26	-0.0601
31044	0.345	0.404	AMBTC	W1P582	W1PPP9	0.8171	0.6809	0.059	-0.1362
31044	0.345	0.573	AMBTC	W1P582	W1P1Y8	0.7956	0.6809	0.228	-0.1147
31044	0.345	0.654	AMBTC	W1P582	W1NTI0	0.7591	0.6809	0.309	-0.0782
31044	0.382	0.469	AMBTC	W1PSC8	W1PTJ8	0.9108	0.9123	0.087	0.0015
31048	0.338	0.466	AMBTC	W1Q0D4	W1P0S5	0.7572	0.7573	0.128	0.0001
31048	0.338	0.355	AMBTC	W1Q0D4	W1NF62	0.9351	0.7785	0.017	-0.1566
31048	0.343	0.552	AMBTC	W1Q0D4	W1PJH3	0.84	0.7785	0.209	-0.0615
31048	0.343	0.509	AMBTC	W1Q0D4	U5CNN8	0.8399	0.7785	0.166	-0.0614
31048	0.343	0.357	AMBTC	W1Q0D4	U5D853	0.8719	0.8052	0.014	-0.0667
31048	0.343	0.405	AMBTC	W1Q0D4	W1PN90	0.8195	0.7785	0.062	-0.041
31048	0.343	0.485	AMBTC	W1Q0D4	W1PLF3	0.8842	0.7785	0.142	-0.1057
31048	0.343	0.378	AMBTC	W1Q0D4	W1PZA1	0.7345	0.7785	0.035	0.044
31048	0.343	0.368	AMBTC	W1Q0D4	W1PXA5	0.871	0.8052	0.025	-0.0658
31048	0.343	0.381	AMBTC	W1Q0D4	W1PUH4	0.9036	0.8052	0.038	-0.0984
31048	0.228	0.522	AMBTC	W1PJH3	W1NPX5	0.8387	0.7708	0.294	-0.0679
31048	0.367	0.526	AMBTC	U5CNN8	U5D057	0.8053	0.8238	0.159	0.0185
31048	0.367	0.526	AMBTC	U5CNN8	U5CXS3	0.7897	0.8238	0.159	0.0341
31048	0.164	0.321	AMBTC	W1PXA5	U5D2Q1	0.7231	0.8725	0.157	0.1494
31050	0.567	0.618	AMBTC	W1NXU7	W1NRB9	0.7879	0.7688	0.051	-0.0191
31050	0.567	0.601	AMBTC	W1NXU7	W1NV79	0.8074	0.7021	0.034	-0.1053
31050	0.567	0.601	AMBTC	W1NXU7	W1NXV4	0.8085	0.7472	0.034	-0.0613
31050	0.567	0.636	AMBTC	W1NXU7	W1NW62	0.8216	0.7104	0.069	-0.1112
31051	0.231	0.24	AMBTC	W1NTA0	W1PHW6	0.9673	0.9462	0.009	-0.0211
31052	0.444	0.506	AMBTC	U5D317	U5DFR5	0.8483	0.8262	0.062	-0.0221
31060	0.568	0.641	AMBTC	U5CZU3	W1PNN7	0.6878	0.7445	0.073	0.0567
31060	0.339	0.376	AMBTC	U5D6X0	U5D9X0	0.7859	0.8069	0.037	0.021
31060	0.378	0.488	AMBTC	W1NLW6	U5CWB8	0.8172	0.8571	0.11	0.0399
31060	0.378	0.464	AMBTC	W1NLW6	W1NJM7	0.8338	0.8571	0.086	0.0233
31060	0.378	0.732	AMBTC	W1NLW6	U5D2L9	0.7036	0.8571	0.354	0.1535
31061	0.241	0.322	AMBTC	U5D3H9	W1NX97	0.8775	0.8694	0.081	-0.0081
31061	0.375	0.375	AMBTC	U5D3H9	W1PEN3	0.8471	0.8694	0	0.0223
31062	0.221	0.241	AMBTC	U5CZG1	W1PT24	0.7621	0.8214	0.02	0.0593
31062	0.079	0.217	AMBTC	W1PKB3	W1NEC4	0.8406	0.9119	0.138	0.0713
31062	0.235	0.267	AMBTC	W1PKB3	U5D867	0.88	0.9119	0.032	0.0319
31062	0.051	0.082	AMBTC	W1PKB3	W1PKB6	0.9844	0.9344	0.031	-0.05
31062	0.051	0.105	AMBTC	W1PKB3	W1PBU6	0.9676	0.9344	0.054	-0.0332
31062	0.051	0.051	AMBTC	W1PKB3	W1PRH7	0.9776	0.9234	0	-0.0542
31062	0.3	0.383	AMBTC	W1PBV0	W1NSN8	0.8778	0.8255	0.083	-0.0523
31062	0.3	0.347	AMBTC	W1PBV0	U5D879	0.8302	0.8255	0.047	-0.0047
31062	0.18	0.274	AMBTC	W1PBV0	W1PI40	0.9244	0.8421	0.094	-0.0823
31062	0.18	0.232	AMBTC	W1PBV0	U5DGE5	0.9123	0.8421	0.052	-0.0702
31062	0.18	0.274	AMBTC	W1PBV0	W1PIE0	0.9065	0.8421	0.094	-0.0644
31062	0.18	0.246	AMBTC	W1PBV0	U5D1L2	0.9421	0.8421	0.066	-0.1
31065	0.12	0.126	AMBTC	W1NZN8	W1PN14	0.7231	0.8377	0.006	0.1146
31065	0.18	0.307	AMBTC	W1NZN8	W1NJH2	0.8937	0.8788	0.127	-0.0149
31065	0.267	0.564	AMBTC	U5D5R1	U5D0Y4	0.8114	0.8337	0.297	0.0223
31065	0.269	0.341	AMBTC	U5D0Y4	U5CYP9	0.7557	0.743	0.072	-0.0127
31066	0.462	0.488	AMBTC	W1NDM6	U5D9K6	0.7968	0.6729	0.026	-0.1239
31066	0.462	0.527	AMBTC	W1NDM6	W1Q095	0.8057	0.6729	0.065	-0.1328
31066	0.462	0.473	AMBTC	W1NDM6	W1P6D9	0.7721	0.6729	0.011	-0.0992
31066	0.368	0.553	AMBTC	U5D9K6	W1NVE4	0.7586	0.7579	0.185	-0.0007
31071	0.552	0.714	AMBTC	W1PF52	W1PE98	0.8682	0.771	0.162	-0.0972
31071	0.552	0.744	AMBTC	W1PF52	W1P1F4	0.8498	0.771	0.192	-0.0788
31071	0.552	0.556	AMBTC	W1PF52	U5DBU2	0.8951	0.771	0.004	-0.1241
31072	0.134	0.209	AMBTC	W1P5T0	W1NQ88	0.7258	0.6782	0.075	-0.0476
31072	0.134	0.443	AMBTC	W1P5T0	W1P2I2	0.7342	0.6933	0.309	-0.0409
31072	0.134	0.379	AMBTC	W1P5T0	W1NTM0	0.8043	0.6933	0.245	-0.111
31072	0.134	0.319	AMBTC	W1P5T0	W1PIK2	0.7984	0.6672	0.185	-0.1312
31072	0.134	0.209	AMBTC	W1P5T0	W1PPS9	0.7308	0.7029	0.075	-0.0279
31072	0.134	0.262	AMBTC	W1P5T0	W1NQM0	0.8095	0.7151	0.128	-0.0944
31072	0.134	0.134	AMBTC	W1P5T0	W1PVB3	0.7944	0.6869	0	-0.1075
31072	0.195	0.258	AMBTC	W1PMY6	U5DA90	0.7696	0.7312	0.063	-0.0384
31072	0.195	0.47	AMBTC	W1PMY6	W1PHC6	0.6971	0.7312	0.275	0.0341
31072	0.195	0.306	AMBTC	W1PMY6	W1PF11	0.7317	0.7312	0.111	-0.0005
31072	0.237	0.61	AMBTC	W1PHC6	W1NH94	0.6828	0.7197	0.373	0.0369
31072	0.306	0.318	AMBTC	W1PMY6	W1NG17	0.7719	0.7627	0.012	-0.0092
31079	0.366	0.372	AMBTC	W1NK30	W1Q0B7	0.7923	0.7763	0.006	-0.016
31079	0.366	0.46	AMBTC	W1NK30	W1PVI8	0.8544	0.7763	0.094	-0.0781
31080	0.553	0.649	AMBTC	W1P2M7	W1NFC1	0.8505	0.829	0.096	-0.0215
31080	0.553	0.756	AMBTC	W1P2M7	W1NG39	0.8291	0.829	0.203	-0.0001
31080	0.735	1.073	AMBTC	W1P8K9	W1P0G9	0.8517	0.7412	0.338	-0.1105
31080	0.735	0.874	AMBTC	W1P8K9	W1P5E1	0.7882	0.7759	0.139	-0.0123
31080	0.735	0.735	AMBTC	W1P8K9	W1NV71	0.857	0.7823	0	-0.0747
31080	0.63	0.644	AMBTC	W1PAD4	W1PXU6	0.7986	0.8314	0.014	0.0328
[truncated: 544,513+ more rows]
