# Supplementary material for: Unveiling the functional fate of duplicated genes through expression profiling and structural analysis
Source: HighWire-hosted journal article supplement (doi:10.1101/gr.280166.124), 2025-08-14
Supplement: Supplemental_Table_S8.xlsx [file Supplemental_Table_S8.xlsx]

## Sheet: Supplemental_Table_S8
Supplemental Table S8. Table presenting expression data comparisons between paralogues (MDO-LDO), paralogous and co-orthologous genes. The following measures are shown: Pearson correlation between paralogues, Pearson correlation between paralogues and orthologues, specificity measure of each paralogue and the orthologue, and tissue specificity difference (delta_tau). The columns indicate: fam_id:…
fam_id	ldo_category	mdo_category	species	ldo_gene	mdo_gene	outgroup_species	out_gene	pcc_stat	pcc_p	out_ldo_pcc_stat	out_ldo_pcc_p	out_mdo_pcc_stat	out_mdo_pcc_p	ldo_tau	mdo_tau	out_tau	sp_group	delta_tau	symmetry
10003	normal	normal	AMBTC	U5D3P0	U5DDV0	PHYPA	A0A2K1IVN7							0.193848	0.161455	0.10572	Plants	-0.0323933	True
10015	normal	normal	AMBTC	U5CZX6	U5DG16	PHYPA	A0A2K1LAL8							0.331013	0.420465	0.0768133	Plants	0.0894526	True
10106	normal	normal	AMBTC	W1PTG2	W1NH32	PHYPA	A9TAL6							0.4032	0.224867	0.262045	Plants	-0.178333	True
10209	normal	normal	AMBTC	W1P845	W1NHT6	PHYPA	A0A2K1J090							0.431826	0.490177	0.189091	Plants	0.0583502	True
10286	normal	normal	AMBTC	W1NHP8	W1PQ48	PHYPA	A9SZJ2							0.452569	0.274835	0.122814	Plants	-0.177734	True
10314	normal	normal	AMBTC	U5DFL6	W1NNH8	PHYPA	A0A2K1IZX4							0.258867	0.462953	0.116433	Plants	0.204085	True
10334	normal	normal	AMBTC	W1PV75	W1PPB6	PHYPA	A0A7I4E338							0.885258		0.601745	Plants		True
10353	normal	normal	AMBTC	W1PXY9	W1NQP6	PHYPA	A0A2K1IU55							0.720347	0.632627	0.564773	Plants	-0.0877194	True
10353	normal	normal	AMBTC	W1PXY9	W1PNI8	PHYPA	A0A2K1IU55							0.720347	0.643498	0.564773	Plants	-0.0768488	True
10383	normal	normal	AMBTC	W1P7L9	U5D0F3	PHYPA	A0A2K1JGI1							0.750578	0.723948	0.069919	Plants	-0.0266303	True
10426	normal	normal	AMBTC	W1NE80	W1PP35	PHYPA	A9TWP7							0.319552	0.794643	0.358374	Plants	0.475091	True
10438	normal	normal	AMBTC	W1NUG2	W1PW25	PHYPA	A0A7I4D2L6							0.166114	0.682608	0.151897	Plants	0.516493	True
10501	normal	normal	AMBTC	W1Q0B1	W1PAZ0	PHYPA	A0A2K1KHK8							0.165593	0.25966	0.0887706	Plants	0.0940662	True
10687	normal	normal	AMBTC	W1P679	U5D5F3	PHYPA	A0A2K1L936							0.273751	0.199466	0.0658932	Plants	-0.0742852	True
10795	normal	normal	AMBTC	W1NDH5	W1PUI3	PHYPA	A0A7I4AB75							0.825022	0.525	0.544752	Plants	-0.300022	True
10795	normal	normal	AMBTC	W1NDH5	W1PZQ0	PHYPA	A0A7I4AB75							0.825022	0.586538	0.544752	Plants	-0.238484	True
10795	normal	normal	AMBTC	W1NDH5	U5DG74	PHYPA	A0A7I4AB75							0.825022	0.998863	0.544752	Plants	0.173841	True
10869	normal	normal	AMBTC	W1P9V7	W1PIE1	PHYPA	A0A067XNN2							0.34399	0.168064	0.0820939	Plants	-0.175926	True
11062	normal	normal	AMBTC	W1PQI5	U5CW66	PHYPA	A0A7I4DBB8							0.310615	0.383104	0.138584	Plants	0.0724888	True
11062	normal	normal	AMBTC	U5D0K2	U5DB78	PHYPA	A0A7I4B421							0.3998	0.346599	0.706279	Plants	-0.0532004	True
11062	normal	normal	AMBTC	W1NEQ1	W1PFN9	PHYPA	A0A2K1IBM1							0.451701	0.601292	0.286639	Plants	0.14959	True
11064	normal	normal	AMBTC	U5CWP9	U5D406	PHYPA	A0A0I9QPN3							0.404453	0.99543	0.147065	Plants	0.590977	True
11071	normal	normal	AMBTC	W1PIL0	W1PKP2	PHYPA	A0A2K1IH38							0.101316	0.214074	0.0928642	Plants	0.112758	True
11214	normal	normal	AMBTC	W1PMA7	U5D4I4	PHYPA	A9TM47							0.24186	0.396527	0.168923	Plants	0.154668	True
11362	normal	normal	AMBTC	W1PUF0	W1P971	PHYPA	A0A2K1LBT0							0.864947	0.761293	0.733071	Plants	-0.103654	True
11426	normal	normal	AMBTC	W1NIS1	W1PZ25	PHYPA	A0A2K1J0T4							0.0765509	0.690286	0.255343	Plants	0.613735	True
11592	normal	normal	AMBTC	U5DF98	U5D7U6	PHYPA	A0A7I4DL31							0.491064	0.335998	0.170262	Plants	-0.155066	True
11592	normal	normal	AMBTC	U5DF98	W1NIN7	PHYPA	A0A7I4DL31							0.491064	0.258808	0.170262	Plants	-0.232255	True
11699	normal	normal	AMBTC	W1PE54	W1P7L1	PHYPA	A0A2K1KQU3							0.349845	0.497064	0.156696	Plants	0.147219	True
11709	normal	normal	AMBTC	W1NGX9	W1PCV3	PHYPA	A0A7I4E4H0							0.7429	0.877556	0.813202	Plants	0.134656	True
11732	normal	normal	AMBTC	W1PJZ3	W1PLM5	PHYPA	A0A7I4AIK5							0.639797	0.371	0.339474	Plants	-0.268797	True
11746	normal	normal	AMBTC	U5DBV9	W1NLC7	PHYPA	A9RIC0							0.90858	0.443869	0.409765	Plants	-0.464711	True
11913	normal	normal	AMBTC	W1PBF8	W1PKX5	PHYPA	A9TF31							0.719226	0.271853	0.0701022	Plants	-0.447372	True
11926	normal	normal	AMBTC	U5CUN6	U5D3G1	PHYPA	A0A2K1J9H0								0.571004	0.475365	Plants		True
11926	normal	normal	AMBTC	U5CUN6	W1PX56	PHYPA	A0A2K1J9H0								0.421714	0.475365	Plants		True
12174	normal	normal	AMBTC	W1NHM0	W1PPD4	PHYPA	A0A7I4DCY2							0.218628	0.184189	0.152028	Plants	-0.0344384	True
12176	normal	normal	AMBTC	W1P2S2	W1NI99	PHYPA	A0A2K1IY55							0.366215	0.36622	0.261438	Plants	4.92902e-06	True
12224	normal	normal	AMBTC	W1NVG2	W1Q027	PHYPA	A0A2K1IVM4							0.368849	0.27064	0.184849	Plants	-0.0982081	True
12378	normal	normal	AMBTC	W1NY72	U5DB14	PHYPA	A0A2K1JVH5							0.360002	0.228596	0.0797948	Plants	-0.131407	True
12570	normal	normal	AMBTC	W1PS43	W1P548	PHYPA	A0A2K1IK03							0.157253	0.280973	0.320607	Plants	0.12372	True
13301	normal	normal	AMBTC	W1NWR2	W1PN60	PHYPA	Q06FC6							0.411502	0.416744	0.756969	Plants	0.00524181	True
13301	normal	normal	AMBTC	W1NWR2	W1NEQ0	PHYPA	Q06FC6							0.411502	0.75232	0.756969	Plants	0.340818	True
13878	normal	normal	AMBTC	W1NSN4	W1PKS5	PHYPA	A0A2K1ISQ8							0.738294	0.859127		Plants	0.120833	True
15486	normal	normal	AMBTC	W1NIJ3	W1P0G0	PHYPA	A0A2K1KAW9							0.43984	0.788291	0.513993	Plants	0.348452	True
15486	normal	normal	AMBTC	W1NIJ3	W1P927	PHYPA	A0A2K1KAW9							0.43984	0.986352	0.513993	Plants	0.546513	True
15852	normal	normal	AMBTC	W1PSM5	W1NU37	PHYPA	A0A2K1IZB8							0.475698	0.483574	0.209717	Plants	0.00787578	True
16134	normal	normal	AMBTC	W1P742	W1P7H0	PHYPA	A0A2K1II60							0.354732	0.153301	0.154348	Plants	-0.201432	True
21022	normal	normal	AMBTC	W1Q003	U5CVN8	PHYPA	A0A2K1J547							0.512128	0.505902	0.138287	Plants	-0.00622541	True
21562	normal	normal	AMBTC	W1NHY1	W1PJB1	PHYPA	A0A2K1KA84							0.336083	0.396611	0.466073	Plants	0.0605288	True
22814	normal	normal	AMBTC	W1PSW7	W1NFL6	PHYPA	A9SR07							0.145182	0.413845	0.0889327	Plants	0.268663	True
22849	normal	normal	AMBTC	W1NEM8	W1PNG6	PHYPA	A0A7I4DI60							0.610234	0.416835	0.475411	Plants	-0.193399	True
22883	normal	normal	AMBTC	W1PEX4	U5D7G7	PHYPA	A0A2K1JHV5							0.385179	0.790352	0.107451	Plants	0.405173	True
22953	normal	normal	AMBTC	W1P2U4	U5CYW7	PHYPA	A9TI15							0.869444	0.305229	0.36219	Plants	-0.564215	True
22953	normal	normal	AMBTC	U5CRL6	W1PPI1	PHYPA	A0A7I4CW83							0.448839	0.447837	0.262681	Plants	-0.00100169	True
23024	normal	normal	AMBTC	U5D7P6	W1NVV1	PHYPA	A9LY13							0.254547	0.275421	0.655374	Plants	0.0208746	True
23089	normal	normal	AMBTC	W1NTX5	U5DGX8	PHYPA	A0A2K1KUC9							0.243109	0.325298	0.111131	Plants	0.0821883	True
24006	normal	normal	AMBTC	W1PGW6	W1P653	PHYPA	A0A2K1KL41							0.268653	0.508013	0.207872	Plants	0.23936	True
24096	normal	normal	AMBTC	W1PH53	U5D2C7	PHYPA	A0A7I4BM96							0.558977	0.510936	0.30402	Plants	-0.048041	True
24221	normal	normal	AMBTC	U5D9Z2	U5CQP3	PHYPA	A0A2K1LAZ2							0.697988	0.679966	0.613949	Plants	-0.0180225	True
24326	normal	normal	AMBTC	W1P1R9	W1NIU7	PHYPA	A9RG47							0.38019	0.433662	0.156929	Plants	0.0534718	True
27003	normal	normal	AMBTC	W1P316	W1NVJ9	PHYPA	A0A2K1IVI4							0.770648	0.409249	0.566058	Plants	-0.361399	True
27005	normal	normal	AMBTC	W1P084	U5D8C2	PHYPA	A0A2K1J8E0							0.856225	0.495491	0.10606	Plants	-0.360734	True
31048	normal	normal	AMBTC	W1Q0D4	W1P0S5	PHYPA	A0A2K1J8Z3							0.432535	0.786465	0.264032	Plants	0.35393	True
31048	normal	normal	AMBTC	W1Q0D4	W1NF62	PHYPA	A0A2K1J8Z3							0.432535	0.663566	0.264032	Plants	0.231032	True
31061	normal	normal	AMBTC	U5D3H9	W1NX97	PHYPA	A0A2K1JG99							0.525942	0.490548	0.180944	Plants	-0.0353936	True
31062	normal	normal	AMBTC	W1PKB3	W1NEC4	PHYPA	A0A2K1J2S1								0.511903	0.789724	Plants		True
31089	normal	normal	AMBTC	W1NNG2	W1PZP4	PHYPA	H1ACT2							0.513284	0.59063	0.178855	Plants	0.0773457	True
31194	normal	normal	AMBTC	U5D480	W1P069	PHYPA	A0A7I4FHT4							0.831174	0.780958	0.562003	Plants	-0.0502157	True
31235	normal	normal	AMBTC	W1PK41	W1PLT2	PHYPA	A0A2K1KT85							0.641729	0.388287	0.732016	Plants	-0.253442	True
31235	normal	normal	AMBTC	W1NFG4	W1P9G5	PHYPA	A9RJ25							0.587054	0.761596	0.777368	Plants	0.174542	True
31235	normal	normal	AMBTC	U5D338	W1PJ38	PHYPA	A0A2K1L8S5							0.998399	0.759389	0.658833	Plants	-0.239009	True
31241	normal	normal	AMBTC	W1NID0	W1PC93	PHYPA	A0A2K1JYP7							0.470644		0.463485	Plants		True
31311	normal	normal	AMBTC	W1P765	W1NUQ2	PHYPA	A9TDP7							0.245602	0.205748	0.278464	Plants	-0.0398535	True
31314	normal	normal	AMBTC	U5DF83	W1PWA8	PHYPA	A0A2K1JK89							0.363004	0.843458	0.0995987	Plants	0.480454	True
31321	normal	normal	AMBTC	W1PLH3	W1P6M7	PHYPA	A0A2K1JS66							0.806592	0.6822	0.882405	Plants	-0.124393	True
31375	normal	normal	AMBTC	W1NTK6	W1P399	PHYPA	A0A2K1II07							0.794811	0.656049	0.440907	Plants	-0.138762	True
31384	normal	normal	AMBTC	E0WD85	W1NVC5	PHYPA	A0A2K1L302							0.50334	0.437495	0.0791677	Plants	-0.0658454	True
31388	normal	normal	AMBTC	W1P4L3	W1PCI2	PHYPA	A0A2K1KPM1							0.612259	0.652364	0.9988	Plants	0.0401046	True
31451	normal	normal	AMBTC	W1NGP9	U5D4H7	PHYPA	A0A2K1KIJ7							0.703012	0.625512	0.286502	Plants	-0.0774999	True
31485	normal	normal	AMBTC	U5CSQ7	U5CM99	PHYPA	A0A2K1JZ74							0.193384	0.173762	0.216569	Plants	-0.0196215	True
31521	normal	normal	AMBTC	U5D3F6	W1PCU4	PHYPA	A0A2K1IQS3							0.495983	0.483193	0.177125	Plants	-0.0127896	True
31683	normal	normal	AMBTC	W1Q050	W1P880	PHYPA	A0A2K1ISB5							0.701899	0.657943	0.688993	Plants	-0.0439562	True
31707	normal	normal	AMBTC	W1NZV2	W1NJN7	PHYPA	A0A2K1IZH0							0.95796	0.531195	0.363879	Plants	-0.426766	True
31719	normal	normal	AMBTC	W1P8R5	W1NQU5	PHYPA	A0A2K1KTP6							0.758802	0.714364	0.401178	Plants	-0.0444382	True
31953	normal	normal	AMBTC	W1NHU3	U5DB97	PHYPA	A0A2K1JE50							0.32824	0.364973	0.359106	Plants	0.0367335	True
31985	normal	normal	AMBTC	U5CPK5	W1Q123	PHYPA	A0A2K1KGA6							0.655883	0.543483	0.496439	Plants	-0.1124	True
31992	normal	normal	AMBTC	W1PSB2	W1PG94	PHYPA	A0A7I4BJ79							0.543335	0.723594	0.215164	Plants	0.180259	True
32191	normal	normal	AMBTC	W1P0M2	W1NQU7	PHYPA	A9TS82							0.802952	0.709128	0.36543	Plants	-0.0938248	True
32227	normal	normal	AMBTC	W1NXW9	W1PGA6	PHYPA	A0A2K1JTK1							0.30493	0.761381	0.532695	Plants	0.456451	True
32227	normal	normal	AMBTC	W1PV67	W1NUZ0	PHYPA	A0A2K1KG28							0.758053	0.783328	0.395231	Plants	0.0252749	True
32246	normal	normal	AMBTC	W1PAE9	W1P8M9	PHYPA	A9TVM3							0.58211	0.645654	0.528763	Plants	0.0635436	True
32246	normal	normal	AMBTC	W1PAE9	W1NHK2	PHYPA	A9TVM3							0.58211	0.318817	0.528763	Plants	-0.263293	True
32285	normal	normal	AMBTC	W1PYJ8	U5D3B6	PHYPA	A0A2K1KJM5							0.388942	0.455481	0.803243	Plants	0.0665392	True
32295	normal	normal	AMBTC	W1PKS2	W1PDJ1	PHYPA	A0A2K1KM12							0.764718	0.635146	0.69875	Plants	-0.129572	True
32467	normal	normal	AMBTC	U5DDS3	W1PVC7	PHYPA	A0A7I4AY79							0.787614	0.762136	0.397214	Plants	-0.0254781	True
33021	normal	normal	AMBTC	U5D9C1	W1NYV6	PHYPA	A0A2K1KAS3							0.983821	0.949698	0.995561	Plants	-0.0341237	True
33044	normal	normal	AMBTC	W1P203	W1NZY0	PHYPA	A0A2K1JUC8							0.844753	0.550262	0.475876	Plants	-0.294491	True
33077	normal	normal	AMBTC	W1NJI7	W1NUX6	PHYPA	A0A2K1IE17							0.251547	0.194437	0.231142	Plants	-0.0571102	True
33101	normal	normal	AMBTC	W1NM13	W1NPI1	PHYPA	A0A060PRG1							0.521159	0.661212	0.437893	Plants	0.140053	True
33122	normal	normal	AMBTC	W1PWH4	W1PTB7	PHYPA	A9SY69							0.975992	0.754934	0.533309	Plants	-0.221058	True
33184	normal	normal	AMBTC	U5D5N6	W1NXA8	PHYPA	A0A2K1IPE6							0.939242		0.301735	Plants		True
36586	normal	normal	AMBTC	W1NYW0	U5CS52	PHYPA	A0A2K1JU94							0.722629	0.691014		Plants	-0.031615	True
36586	normal	normal	AMBTC	W1NYW0	U5D1F0	PHYPA	A0A2K1JU94							0.722629	0.586592		Plants	-0.136038	True
42683	normal	normal	AMBTC	W1PYG1	W1PMB2	PHYPA	A9T4F7							0.879194	0.602443	0.910385	Plants	-0.276752	True
42861	normal	normal	AMBTC	W1PVZ5	W1PYZ6	PHYPA	A0A2K1K3F6							0.284477	0.393675	0.254179	Plants	0.109197	True
42893	normal	normal	AMBTC	W1PP65	W1NK69	PHYPA	A0A2K1KFT5							0.321537	0.397426	0.284677	Plants	0.0758893	True
43390	normal	normal	AMBTC	W1NRS5	U5DBC9	PHYPA	A0A2K1IJE7							0.436184	0.274518	0.144105	Plants	-0.161666	True
43490	normal	normal	AMBTC	W1PGU9	U5D3R3	PHYPA	A0A7I4CUL0							0.401712	0.603483	0.579382	Plants	0.201771	True
43523	normal	normal	AMBTC	U5DCE7	U5D3K2	PHYPA	A9SGH8							0.518628	0.714013	0.222563	Plants	0.195385	True
43768	normal	normal	AMBTC	W1NGB3	W1P6L8	PHYPA	A0A2K1KP99							0.395976	0.287125	0.349931	Plants	-0.10885	True
43874	normal	normal	AMBTC	W1PN71	U5DAC9	PHYPA	A0A2K1II86							0.742896	0.497402	0.319306	Plants	-0.245494	True
43874	normal	normal	AMBTC	W1P5D2	U5D3J9	PHYPA	A0A2K1KAV9							0.27722	0.443474	0.131683	Plants	0.166254	True
43880	normal	normal	AMBTC	W1NTK8	U5DEP8	PHYPA	A9SCG3							0.444316	0.622859	0.107962	Plants	0.178543	True
45614	normal	normal	AMBTC	W1PP87	W1P759	PHYPA	A0A2K1IID2							0.525492	0.32872	0.0719013	Plants	-0.196772	True
45693	normal	normal	AMBTC	W1NF20	U5D7X6	PHYPA	A0A2K1L1Q7							0.326603	0.871528	0.276781	Plants	0.544925	True
45719	normal	normal	AMBTC	W1PD02	U5DCT4	PHYPA	A0A2K1JG72							0.329122	0.349044	0.142817	Plants	0.0199227	True
45752	normal	normal	AMBTC	W1PUV9	W1PNG1	PHYPA	A0A2K1JPF6							0.310963	0.34205	0.095783	Plants	0.0310865	True
45764	normal	normal	AMBTC	W1P3A9	U5D8N1	PHYPA	A0A2K1JM15							0.329779	0.702847	0.20873	Plants	0.373068	True
45826	normal	normal	AMBTC	U5CZQ4	W1P7J5	PHYPA	A0A7I4E2X5							0.458269	0.306483	0.0396886	Plants	-0.151786	True
45974	normal	normal	AMBTC	W1NYP2	W1PP90	PHYPA	A0A2K1L202							0.845037	0.466215	0.258756	Plants	-0.378823	True
46034	normal	normal	AMBTC	W1NWR0	U5DDZ3	PHYPA	A0A2K1J9T9							0.754222	0.2113	0.209829	Plants	-0.542922	True
46284	normal	normal	AMBTC	W1PHT2	W1PG28	PHYPA	A0A2K1L0G7							0.336936	0.577104	0.158577	Plants	0.240168	True
46398	normal	normal	AMBTC	W1NHT9	W1NFA3	PHYPA	A0A7I4CGE2							0.360673	0.412398	0.0744273	Plants	0.0517259	True
47973	normal	normal	AMBTC	U5CXK6	W1PIG9	PHYPA	A0A2K1IU34							0.562098	0.508699	0.851667	Plants	-0.0533984	True
47990	normal	normal	AMBTC	W1PER1	U5D983	PHYPA	A0A2K1IW31							0.406342	0.647131	0.460792	Plants	0.240789	True
48017	normal	normal	AMBTC	U5CW92	W1PNN6	PHYPA	A0A2K1IFQ8							0.728871	0.425901	0.94862	Plants	-0.30297	True
10015	normal	normal	AMBTC	U5DG16	U5D1P9	SELML	D8S3C3	1	1	1	1	1	1	0.420465	0.569897	0.453525	Plants	0.149432	True
10015	normal	normal	AMBTC	U5DG16	W1PPW2	SELML	D8S3C3	1	1	1	1	1	1	0.420465	0.380874	0.453525	Plants	-0.0395916	True
10015	normal	normal	AMBTC	U5DG16	W1NP87	SELML	D8S3C3	-1	1	1	1	-1	1	0.420465	0.397734	0.453525	Plants	-0.0227313	True
10015	normal	normal	AMBTC	U5CZX6	W1PT52	SELML	D8RHL1	1	1	1	1	1	1	0.331013	0.548646	0.265811	Plants	0.217633	True
10015	normal	normal	AMBTC	W1NQR1	U5DFW5	SELML	D8SDI5	1	1	-1	1	-1	1	0.838635	0.269249	0.404471	Plants	-0.569387	True
10015	normal	normal	AMBTC	W1NQR1	W1NJ12	SELML	D8SDI5	1	1	-1	1	-1	1	0.838635	0.595178	0.404471	Plants	-0.243458	True
10026	normal	normal	AMBTC	U5D644	W1PYT2	SELML	D8QRB2	1	1	1	1	1	1	0.231835	0.299992	0.134461	Plants	0.0681572	True
10030	normal	normal	AMBTC	U5DG98	W1NH51	SELML	D8T3M8	-1	1	1	1	-1	1	0.471079	0.485206	0.160442	Plants	0.0141267	True
10091	normal	normal	AMBTC	W1NF27	W1NFX5	SELML	D8SZU0	1	1	-1	1	-1	1	0.268494	0.449494	0.0435803	Plants	0.181	True
10106	normal	normal	AMBTC	W1NH32	W1NJT3	SELML	D8SEJ9	1	1	-1	1	-1	1	0.224867	0.921893	0.0922036	Plants	0.697026	True
10106	normal	normal	AMBTC	W1NH32	W1NIZ4	SELML	D8SEJ9	1	1	-1	1	-1	1	0.224867	0.744724	0.0922036	Plants	0.519858	True
10108	normal	normal	AMBTC	W1PE59	W1NH05	SELML	D8S250	1	1	-1	1	-1	1	0.349544	0.202951	0.159878	Plants	-0.146593	True
10108	normal	normal	AMBTC	W1PE59	U5D3E2	SELML	D8S250	1	1	-1	1	-1	1	0.349544	0.438562	0.159878	Plants	0.0890176	True
10108	normal	normal	AMBTC	W1PE59	U5DAT7	SELML	D8S250	1	1	-1	1	-1	1	0.349544	0.487701	0.159878	Plants	0.138157	True
10108	normal	normal	AMBTC	W1PQ41	W1PK51	SELML	D8SQL8	1	1	1	1	1	1	0.672605	0.467968	0.0827018	Plants	-0.204638	True
10108	normal	normal	AMBTC	W1PNK1	W1NKG2	SELML	D8RE71	1	1	1	1	1	1	0.258357	0.562217	0.117721	Plants	0.30386	True
10108	normal	normal	AMBTC	W1PNK1	W1PP83	SELML	D8RE71	1	1	1	1	1	1	0.258357	0.475733	0.117721	Plants	0.217376	True
10108	normal	normal	AMBTC	U5CZB9	U5DEF0	SELML	D8S4R1	-1	1	-1	1	1	1	0.500416	0.170001	0.109544	Plants	-0.330416	True
10110	normal	normal	AMBTC	U5D7U2	W1PWA7	SELML	D8TC88	-1	1	1	1	-1	1	0.581401	0.46614	0.184379	Plants	-0.115261	True
10110	normal	normal	AMBTC	U5D7U2	U5D615	SELML	D8TC88	1	1	1	1	1	1	0.581401	0.304315	0.184379	Plants	-0.277086	True
10113	normal	normal	AMBTC	W1P7A0	U5D4Z3	SELML	D8RRF8	-1	1	1	1	-1	1	0.238708	0.267468	0.0435733	Plants	0.0287591	True
10114	normal	normal	AMBTC	W1NIK6	W1PJA3	SELML	D8R598	1	1	1	1	1	1	0.348173	0.213978	0.140864	Plants	-0.134195	True
10168	normal	normal	AMBTC	W1PF59	W1NPD5	SELML	D8SY53	1	1	-1	1	-1	1	0.515849	0.863625	0.242862	Plants	0.347776	True
10168	normal	normal	AMBTC	W1PF59	U5CYS5	SELML	D8SY53	1	1	-1	1	-1	1	0.515849	0.566611	0.242862	Plants	0.0507623	True
10168	normal	normal	AMBTC	W1PF59	W1Q0P8	SELML	D8SY53	1	1	-1	1	-1	1	0.515849	0.27067	0.242862	Plants	-0.245179	True
10177	normal	normal	AMBTC	U5DDD7	W1NMG8	SELML	D8SLS0	1	1	-1	1	-1	1	0.617566	0.742654	0.589645	Plants	0.125089	True
10177	normal	normal	AMBTC	W1NXX5	W1P5G1	SELML	D8SCR3	-1	1	1	1	-1	1	0.606302	0.430088	0.3711	Plants	-0.176214	True
10177	normal	normal	AMBTC	W1NXX5	W1NUR1	SELML	D8SCR3	-1	1	1	1	-1	1	0.606302	0.6663	0.3711	Plants	0.0599977	True
10177	normal	normal	AMBTC	W1NXX5	U5D874	SELML	D8SCR3	-1	1	1	1	-1	1	0.606302	0.6107	0.3711	Plants	0.00439756	True
10177	normal	normal	AMBTC	W1NXX5	U5CZ45	SELML	D8SCR3	-1	1	1	1	-1	1	0.606302	0.701153	0.3711	Plants	0.0948509	True
10188	normal	normal	AMBTC	U5D8L2	W1NKG8	SELML	D8T3N6	1	1	1	1	1	1	0.419686	0.177271	0.0533424	Plants	-0.242415	True
10202	normal	normal	AMBTC	W1PC62	W1NQ31	SELML	D8RGP0	1	1	1	1	1	1	0.417371	0.37744	0.0566262	Plants	-0.0399307	True
10209	normal	normal	AMBTC	W1NHT6	W1NL42	SELML	D8RAH1	-1	1	-1	1	1	1	0.490177	0.673075	0.541825	Plants	0.182898	True
10209	normal	normal	AMBTC	W1NHT6	W1Q0H8	SELML	D8RAH1	1	1	-1	1	-1	1	0.490177	0.320288	0.541825	Plants	-0.169889	True
10209	normal	normal	AMBTC	U5CYV4	W1NSU0	SELML	D8T5M6	-1	1	-1	1	1	1	0.41508	0.435332	0.076163	Plants	0.020252	True
10210	normal	normal	AMBTC	U5DCI7	W1PND3	SELML	D8SCN8	1	1	1	1	1	1	0.235169	0.265345	0.147943	Plants	0.0301761	True
10218	normal	normal	AMBTC	W1PTH2	U5D5G0	SELML	D8QZS9	1	1	-1	1	-1	1	0.392236	0.294462	0.101017	Plants	-0.0977737	True
10219	normal	normal	AMBTC	W1PGQ4	W1NNR9	SELML	D8RRI2	1	1	1	1	1	1	0.377739	0.284167	0.13619	Plants	-0.0935724	True
10219	normal	normal	AMBTC	U5D8K5	U5D2S1	SELML	D8SPI2	1	1	1	1	1	1	0.165802	0.742508	0.185064	Plants	0.576706	True
10241	normal	normal	AMBTC	W1PDY6	U5D433	SELML	D8TCS9	1	1	1	1	1	1	0.346302	0.425923	0.0630859	Plants	0.0796216	True
10252	normal	normal	AMBTC	W1NQ90	U5CXS2	SELML	D8RUW5	-1	1	1	1	-1	1	0.319354	0.308836	0.107082	Plants	-0.0105181	True
10252	normal	normal	AMBTC	W1P484	W1NI10	SELML	D8QRD2	1	1	1	1	1	1	0.8776	0.975393	0.117377	Plants	0.0977927	True
10257	normal	normal	AMBTC	W1Q0R1	W1NNS4	SELML	D8REL8	-1	1	1	1	-1	1	0.306317	0.409771	0.047299	Plants	0.103454	True
10257	normal	normal	AMBTC	W1Q0R1	W1P023	SELML	D8REL8	-1	1	1	1	-1	1	0.306317	0.217337	0.047299	Plants	-0.0889806	True
10257	normal	normal	AMBTC	W1Q0R1	W1P135	SELML	D8REL8	-1	1	1	1	-1	1	0.306317	0.42461	0.047299	Plants	0.118293	True
10285	normal	normal	AMBTC	W1PRY0	U5CX30	SELML	D8R9M8	1	1	-1	1	-1	1	0.455063	0.679076	0.18027	Plants	0.224013	True
10286	normal	normal	AMBTC	W1PQ48	W1P0M0	SELML	D8R4K3	1	1	-1	1	-1	1	0.274835	0.284678	0.0502738	Plants	0.00984326	True
10288	normal	normal	AMBTC	U5CZP6	W1NYE1	SELML	D8QRQ4	1	1	1	1	1	1	0.405732	0.518771	0.0648852	Plants	0.113039	True
10288	normal	normal	AMBTC	U5D1I1	W1PIK4	SELML	D8QQD9	-1	1	1	1	-1	1	0.388325	0.352866	0.204992	Plants	-0.0354588	True
10288	normal	normal	AMBTC	U5D1I1	W1PHJ8	SELML	D8QQD9	-1	1	1	1	-1	1	0.388325	0.455887	0.204992	Plants	0.0675625	True
10288	normal	normal	AMBTC	U5D1I1	W1NQM4	SELML	D8QQD9	1	1	1	1	1	1	0.388325	0.315438	0.204992	Plants	-0.0728865	True
10288	normal	normal	AMBTC	U5D1I1	W1NFD8	SELML	D8QQD9	1	1	1	1	1	1	0.388325	0.245707	0.204992	Plants	-0.142618	True
10288	normal	normal	AMBTC	W1P0D8	W1NU12	SELML	D8RDI2	-1	1					0.332504	0.216515		Plants	-0.115989	True
10302	normal	normal	AMBTC	U5CZX7	U5DC96	SELML	D8SFR0	1	1	1	1	1	1	0.34231	0.372206	0.228892	Plants	0.0298958	True
10314	normal	normal	AMBTC	U5DFL6	W1NDT2	SELML	D8RT31	-1	1	1	1	-1	1	0.258867	0.294633	0.0674237	Plants	0.0357662	True
10315	normal	normal	AMBTC	U5CZM7	W1Q051	SELML	D8RML3	-1	1	1	1	-1	1	0.2628	0.27313	0.0500478	Plants	0.0103294	True
10315	normal	normal	AMBTC	U5CZM7	W1NNY2	SELML	D8RML3	1	1	1	1	1	1	0.2628	0.401568	0.0500478	Plants	0.138767	True
10315	normal	normal	AMBTC	U5CZM7	W1NE48	SELML	D8RML3	1	1	1	1	1	1	0.2628	0.282065	0.0500478	Plants	0.019265	True
10332	normal	normal	AMBTC	W1PFM1	W1P1M9	SELML	D8SPK2	-1	1	1	1	-1	1	0.302656	0.805958	0.105146	Plants	0.503303	True
10334	normal	normal	AMBTC	W1PV75	W1PH28	SELML	D8RTI3	1	1	-1	1	-1	1	0.885258	0.948593	0.757285	Plants	0.0633346	True
10334	normal	normal	AMBTC	W1PI23	W1Q0T2	SELML	D8SF50	-1	1	-1	1	1	1	0.751919	0.604757	0.628347	Plants	-0.147162	True
10334	normal	normal	AMBTC	W1PI23	W1PJJ4	SELML	D8SF50	-1	1	-1	1	1	1	0.751919	0.880907	0.628347	Plants	0.128989	True
10352	normal	normal	AMBTC	W1NFP8	W1NGJ9	SELML	D8QPY6	1	1	-1	1	-1	1	0.388576	0.26944	0.757585	Plants	-0.119136	True
10352	normal	normal	AMBTC	W1NFP8	W1NQ21	SELML	D8QPY6	-1	1	-1	1	1	1	0.388576	0.280329	0.757585	Plants	-0.108248	True
10353	normal	normal	AMBTC	W1PXY9	U5DAK9	SELML	D8QQG8	1	1	-1	1	-1	1	0.720347	0.67869	0.398822	Plants	-0.0416569	True
10353	normal	normal	AMBTC	W1PNI8	U5CUR2	SELML	D8S8X6	1	1	1	1	1	1	0.643498	0.759842	0.274872	Plants	0.116344	True
10353	normal	normal	AMBTC	W1PNI8	W1PNM9	SELML	D8S8X6	1	1	1	1	1	1	0.643498	0.833564	0.274872	Plants	0.190066	True
10362	normal	normal	AMBTC	W1PEM3	W1PT25	SELML	D8SHP7	1	1	1	1	1	1	0.43996	0.730426	0.0818906	Plants	0.290465	True
10366	normal	normal	AMBTC	W1P6F6	U5D3X9	SELML	D8T0W8	-1	1	-1	1	1	1	0.370143	0.356828	0.101206	Plants	-0.0133153	True
10378	normal	normal	AMBTC	U5DBG5	U5DD57	SELML	D8QP20	1	1	1	1	1	1	0.35603	0.309357	0.0430214	Plants	-0.0466725	True
10383	normal	normal	AMBTC	W1PQR4	W1PHD2	SELML	D8S736	1	1	1	1	1	1	0.389678	0.195493	0.0739928	Plants	-0.194184	True
10388	normal	normal	AMBTC	W1PGC8	W1NUX1	SELML	D8RYL2	-1	1	1	1	-1	1	0.395456	0.456153	0.13747	Plants	0.060697	True
10404	normal	normal	AMBTC	U5CPU4	W1NE27	SELML	D8SFR8	-1	1	1	1	-1	1	0.815556	0.529106	0.220999	Plants	-0.28645	True
10438	normal	normal	AMBTC	W1NUG2	W1PB45	SELML	D8QYT7	1	1	1	1	1	1	0.166114	0.305982	0.0811112	Plants	0.139868	True
10438	normal	normal	AMBTC	W1NUG2	W1P0A1	SELML	D8QYT7	1	1	1	1	1	1	0.166114	0.79368	0.0811112	Plants	0.627566	True
10438	normal	normal	AMBTC	W1NUG2	W1NKA4	SELML	D8QYT7	1	1	1	1	1	1	0.166114	0.201487	0.0811112	Plants	0.0353724	True
10442	normal	normal	AMBTC	W1P5H0	W1PEP0	SELML	D8RRX8	1	1	1	1	1	1	0.28901	0.127913	0.147655	Plants	-0.161097	True
10460	normal	normal	AMBTC	W1P337	W1Q007	SELML	D8SCZ2	-1	1	1	1	-1	1	0.455025	0.531493	0.161762	Plants	0.0764679	True
10501	normal	normal	AMBTC	W1NJE6	W1P2K6	SELML	D8T867	1	1	1	1	1	1	0.344183	0.316281	0.109987	Plants	-0.0279025	True
10509	normal	normal	AMBTC	U5CX90	U5CZ55	SELML	D8RYY7	1	1	-1	1	-1	1	0.369938	0.601567	0.233262	Plants	0.231628	True
10527	normal	normal	AMBTC	W1PF60	W1NNS5	SELML	D8STL4	1	1	1	1	1	1	0.256393	0.53601	0.0449086	Plants	0.279618	True
10535	normal	normal	AMBTC	U5DFX7	W1NSF3	SELML	D8S8M8	-1	1	1	1	-1	1	0.439257	0.300946	0.0204202	Plants	-0.138312	True
10543	normal	normal	AMBTC	W1NUN2	U5D374	SELML	D8SCD9	-1	1	-1	1	1	1	0.798042	0.975252	0.559298	Plants	0.17721	True
10551	normal	normal	AMBTC	W1NJG0	W1NGE2	SELML	D8SWU6	-1	1	1	1	-1	1	0.50621	0.881681	0.295756	Plants	0.375472	True
10579	normal	normal	AMBTC	W1PMJ3	U5CYF4	SELML	D8SAN7	-1	1	-1	1	1	1	0.405772	0.277445	0.111616	Plants	-0.128327	True
10579	normal	normal	AMBTC	W1PMJ3	U5DA52	SELML	D8SAN7	-1	1	-1	1	1	1	0.405772	0.469405	0.111616	Plants	0.0636325	True
10585	normal	normal	AMBTC	W1PMX7	W1PJ90	SELML	D8SF76	-1	1	1	1	-1	1	0.194424	0.578506	0.0783423	Plants	0.384082	True
10585	normal	normal	AMBTC	W1NQT9	W1NS87	SELML	D8QPH2	1	1	1	1	1	1	0.397283	0.357475	0.198066	Plants	-0.0398073	True
10593	normal	normal	AMBTC	W1P1R3	W1PF66	SELML	D8RHP2	1	1	-1	1	-1	1	0.42848	0.829077	0.101151	Plants	0.400597	True
10593	normal	normal	AMBTC	W1P1R3	U5D0B8	SELML	D8RHP2	-1	1	-1	1	1	1	0.42848	0.524234	0.101151	Plants	0.0957537	True
10621	normal	normal	AMBTC	W1PHF9	W1PEF1	SELML	D8R1C4	1	1	1	1	1	1	0.242145	0.28713	0.0469254	Plants	0.0449851	True
10634	normal	normal	AMBTC	W1P7I1	W1PSR8	SELML	D8RW78	-1	1	-1	1	1	1	0.418312	0.234799	0.0856055	Plants	-0.183514	True
10634	normal	normal	AMBTC	W1P7I1	W1PWK5	SELML	D8RW78	-1	1	-1	1	1	1	0.418312	0.199261	0.0856055	Plants	-0.219051	True
10634	normal	normal	AMBTC	W1P7I1	W1PUK9	SELML	D8RW78	-1	1	-1	1	1	1	0.418312	0.0908041	0.0856055	Plants	-0.327508	True
10641	normal	normal	AMBTC	U5CXF7	W1NG63	SELML	D8SAB1	-1	1	1	1	-1	1	0.935314	0.662782	0.129814	Plants	-0.272532	True
10641	normal	normal	AMBTC	U5CXF7	U5CXA2	SELML	D8SAB1	1	1	1	1	1	1	0.935314	0.861179	0.129814	Plants	-0.0741351	True
10641	normal	normal	AMBTC	U5CXF7	W1NFG1	SELML	D8SAB1	-1	1	1	1	-1	1	0.935314	0.545808	0.129814	Plants	-0.389507	True
10663	normal	normal	AMBTC	W1PYB3	W1PW51	SELML	D8SJM0	1	1	-1	1	-1	1	0.288868	0.428061	0.0415626	Plants	0.139193	True
10663	normal	normal	AMBTC	W1P3E0	W1PNA9	SELML	D8SQT4	1	1	1	1	1	1	0.265528	0.91067	0.05155	Plants	0.645142	True
10682	normal	normal	AMBTC	U5D4V1	U5CYG1	SELML	D8RMK3	-1	1	-1	1	1	1	0.131149	0.135163	0.0760545	Plants	0.00401401	True
10693	normal	normal	AMBTC	W1PCA0	U5D0Z0	SELML	D8T729	1	1	1	1	1	1	0.214574	0.331399	0.332065	Plants	0.116825	True
10693	normal	normal	AMBTC	W1PCA0	W1PS35	SELML	D8T729	1	1	1	1	1	1	0.214574	0.247978	0.332065	Plants	0.0334041	True
10694	normal	normal	AMBTC	W1NI36	W1Q0V7	SELML	D8RE62	-1	1	1	1	-1	1	0.458041	0.520111	0.117869	Plants	0.0620699	True
10732	normal	normal	AMBTC	W1PKE0	U5D458	SELML	D8RLW3	1	1	1	1	1	1	0.158211	0.341922	0.231161	Plants	0.183711	True
10742	normal	normal	AMBTC	W1PG48	W1PXN1	SELML	D8R2P3	-1	1	1	1	-1	1	0.595254	0.592757	0.550234	Plants	-0.00249722	True
10742	normal	normal	AMBTC	W1NUD9	W1PQT7	SELML	D8SL65	1	1	-1	1	-1	1	0.218427	0.39643	0.280478	Plants	0.178002	True
10742	normal	normal	AMBTC	W1P8X5	U5CXI1	SELML	D8QXD7	-1	1	-1	1	1	1	0.356501	0.365144	0.174409	Plants	0.00864262	True
10742	normal	normal	AMBTC	W1P8X5	W1PFV8	SELML	D8QXD7	-1	1	-1	1	1	1	0.356501	0.500793	0.174409	Plants	0.144292	True
10766	normal	normal	AMBTC	W1PIB4	U5D9B1	SELML	D8SBI9	1	1	1	1	1	1	0.293935	0.163846	0.0650145	Plants	-0.130089	True
10774	normal	normal	AMBTC	U5DCV3	W1PMI8	SELML	D8QNF2	-1	1	-1	1	1	1	0.28139	0.479124	0.0855945	Plants	0.197734	True
10783	normal	normal	AMBTC	W1NGE3	W1NFG9	SELML	D8QZQ1	-1	1	-1	1	1	1	0.478791	0.323668	0.537341	Plants	-0.155122	True
10783	normal	normal	AMBTC	W1PMW0	U5D8M0	SELML	D8TBH5	-1	1	1	1	-1	1	0.801719	0.92498	0.266948	Plants	0.123261	True
10788	normal	normal	AMBTC	W1PBR9	W1PFS8	SELML	D8T0H9	1	1	-1	1	-1	1	0.35219	0.426313	0.0763993	Plants	0.0741222	True
10788	normal	normal	AMBTC	W1PBR9	W1NFB4	SELML	D8T0H9	1	1	-1	1	-1	1	0.35219	0.304905	0.0763993	Plants	-0.0472855	True
10788	normal	normal	AMBTC	W1PBR9	W1PVQ2	SELML	D8T0H9	1	1	-1	1	-1	1	0.35219	0.398491	0.0763993	Plants	0.0463002	True
10788	normal	normal	AMBTC	W1PBR9	U5CZC8	SELML	D8T0H9	-1	1	-1	1	1	1	0.35219	0.519183	0.0763993	Plants	0.166993	True
10791	normal	normal	AMBTC	U5DEL5	W1PD49	SELML	D8R855	-1	1	1	1	-1	1	0.544127	0.374126	0.800866	Plants	-0.170001	True
10791	normal	normal	AMBTC	U5DEL5	W1Q131	SELML	D8R855	-1	1	1	1	-1	1	0.544127	0.679929	0.800866	Plants	0.135802	True
10791	normal	normal	AMBTC	W1PFZ9	W1P3E6	SELML	D8RNG5	-1	1	1	1	-1	1	0.64112	0.510191	0.594365	Plants	-0.130929	True
10792	normal	normal	AMBTC	W1NNH0	U5D125	SELML	D8QZE9	1	1	1	1	1	1	0.257354	0.198657	0.197934	Plants	-0.0586972	True
10795	normal	normal	AMBTC	W1PUI3	W1NM31	SELML	D8TBM4	1	1	-1	1	-1	1	0.525	0.534797	0.312251	Plants	0.00979708	True
10795	normal	normal	AMBTC	U5DG74	U5DAC1	SELML	D8S9F4	-1	1					0.998863	0.808817		Plants	-0.190046	True
10795	normal	normal	AMBTC	U5DG74	W1PVA4	SELML	D8S9F4	1	1					0.998863	0.995048		Plants	-0.00381521	True
10795	normal	normal	AMBTC	U5DG74	W1PKD4	SELML	D8S9F4	1	1					0.998863	0.663121		Plants	-0.335742	True
10795	normal	normal	AMBTC	W1PR18	W1P270	SELML	D8TC12	1	1	-1	1	-1	1	0.441311	0.726435	0.218114	Plants	0.285123	True
10795	normal	normal	AMBTC	W1PR18	W1NUK9	SELML	D8TC12	1	1	-1	1	-1	1	0.441311	0.633486	0.218114	Plants	0.192174	True
10795	normal	normal	AMBTC	W1NLI0	U5D332	SELML	D8TFM9	-1	1	-1	1	1	1	0.624895	0.914455	0.295959	Plants	0.28956	True
10795	normal	normal	AMBTC	W1NLI0	W1PTD0	SELML	D8TFM9	1	1	-1	1	-1	1	0.624895	0.517144	0.295959	Plants	-0.107751	True
10795	normal	normal	AMBTC	W1NLI0	U5DCV9	SELML	D8TFM9	1	1	-1	1	-1	1	0.624895	0.467318	0.295959	Plants	-0.157577	True
10795	normal	normal	AMBTC	W1NLI0	U5DDC5	SELML	D8TFM9	-1	1	-1	1	1	1	0.624895	0.627222	0.295959	Plants	0.00232682	True
10795	normal	normal	AMBTC	W1NLI0	W1P6Q7	SELML	D8TFM9	-1	1	-1	1	1	1	0.624895	0.221406	0.295959	Plants	-0.403489	True
10795	normal	normal	AMBTC	W1NLI0	W1P1I0	SELML	D8TFM9	-1	1	-1	1	1	1	0.624895	0.455072	0.295959	Plants	-0.169823	True
10795	normal	normal	AMBTC	W1NLI0	W1PKZ3	SELML	D8TFM9			-1	1			0.624895		0.295959	Plants		True
10795	normal	normal	AMBTC	W1NLI0	U5D1C9	SELML	D8TFM9	1	1	-1	1	-1	1	0.624895	0.998676	0.295959	Plants	0.373781	True
10795	normal	normal	AMBTC	W1NLI0	U5DDE5	SELML	D8TFM9	-1	1	-1	1	1	1	0.624895	0.622694	0.295959	Plants	-0.00220144	True
10795	normal	normal	AMBTC	W1NLI0	W1PND1	SELML	D8TFM9	1	1	-1	1	-1	1	0.624895	0.999553	0.295959	Plants	0.374658	True
10795	normal	normal	AMBTC	W1NLI0	W1PBK5	SELML	D8TFM9	-1	1	-1	1	1	1	0.624895	0.846606	0.295959	Plants	0.221711	True
10795	normal	normal	AMBTC	W1NLI0	W1PNF5	SELML	D8TFM9	1	1	-1	1	-1	1	0.624895	0.771709	0.295959	Plants	0.146813	True
10797	normal	normal	AMBTC	U5CZ85	U5CSG5	SELML	D8R3P7	1	1	-1	1	-1	1	0.218532	0.615355	0.0542351	Plants	0.396823	True
10806	normal	normal	AMBTC	W1PDV1	W1NQJ6	SELML	D8S5U3	1	1	1	1	1	1	0.268752	0.460796	0.0975435	Plants	0.192044	True
10809	normal	normal	AMBTC	W1NYJ3	U5D3P6	SELML	D8RJK1	1	1	1	1	1	1	0.0956635	0.193982	0.0619879	Plants	0.0983188	True
10809	normal	normal	AMBTC	W1NYJ3	W1NU41	SELML	D8RJK1	-1	1	1	1	-1	1	0.0956635	0.323567	0.0619879	Plants	0.227904	True
10811	normal	normal	AMBTC	W1NMD6	W1PJV8	SELML	D8RRC1	1	1	-1	1	-1	1	0.426001	0.370497	0.129469	Plants	-0.0555032	True
10811	normal	normal	AMBTC	W1NMD6	W1PJ37	SELML	D8RRC1			-1	1			0.426001		0.129469	Plants		True
10811	normal	normal	AMBTC	W1NMD6	W1PWB7	SELML	D8RRC1	-1	1	-1	1	1	1	0.426001	0.38931	0.129469	Plants	-0.0366901	True
10891	normal	normal	AMBTC	W1PB90	W1P593	SELML	D8SGJ7	-1	1	-1	1	1	1	0.465201	0.358031	0.178659	Plants	-0.107171	True
10891	normal	normal	AMBTC	W1PB90	W1PXC8	SELML	D8SGJ7	1	1	-1	1	-1	1	0.465201	0.801888	0.178659	Plants	0.336687	True
10891	normal	normal	AMBTC	W1PB90	W1NNC0	SELML	D8SGJ7	1	1	-1	1	-1	1	0.465201	0.721921	0.178659	Plants	0.25672	True
10891	normal	normal	AMBTC	W1PB90	W1PTR5	SELML	D8SGJ7	-1	1	-1	1	1	1	0.465201	0.69698	0.178659	Plants	0.231779	True
10891	normal	normal	AMBTC	W1PB90	W1NH42	SELML	D8SGJ7	-1	1	-1	1	1	1	0.465201	0.35335	0.178659	Plants	-0.111851	True
10891	normal	normal	AMBTC	W1PB90	W1NJU6	SELML	D8SGJ7	-1	1	-1	1	1	1	0.465201	0.72017	0.178659	Plants	0.254968	True
10896	normal	normal	AMBTC	U5CM29	W1PBI0	SELML	D8SAS5	1	1	1	1	1	1	0.459725	0.804337	0.124607	Plants	0.344612	True
10903	normal	normal	AMBTC	W1Q0E3	W1P3S0	SELML	D8RE08	-1	1	-1	1	1	1	0.281519	0.435547	0.14125	Plants	0.154028	True
10903	normal	normal	AMBTC	W1Q0E3	U5D517	SELML	D8RE08	-1	1	-1	1	1	1	0.281519	0.351049	0.14125	Plants	0.0695293	True
10926	normal	normal	AMBTC	U5D6N3	W1NVC7	SELML	D8QUQ2	1	1	1	1	1	1	0.458444	0.254079	0.112708	Plants	-0.204365	True
10926	normal	normal	AMBTC	U5D6N3	W1NEE2	SELML	D8QUQ2	1	1	1	1	1	1	0.458444	0.262193	0.112708	Plants	-0.196252	True
10971	normal	normal	AMBTC	W1PT86	W1PFN1	SELML	D8RG20	1	1	1	1	1	1	0.351964	0.408606	0.222459	Plants	0.0566419	True
10972	normal	normal	AMBTC	W1NIP5	W1PUK8	SELML	D8SK53	1	1	1	1	1	1	0.359986	0.477492	0.0418551	Plants	0.117506	True
10972	normal	normal	AMBTC	W1NIP5	W1P4I9	SELML	D8SK53	-1	1	1	1	-1	1	0.359986	0.301228	0.0418551	Plants	-0.0587583	True
10980	normal	normal	AMBTC	U5D7V1	U5DBV3	SELML	D8SAV8	-1	1	1	1	-1	1	0.491437	0.573892	0.299039	Plants	0.0824553	True
10980	normal	normal	AMBTC	U5D7V1	W1PGM5	SELML	D8SAV8	1	1	1	1	1	1	0.491437	0.461232	0.299039	Plants	-0.0302048	True
10992	normal	normal	AMBTC	W1PIV1	U5DCX7	SELML	D8S8C1	1	1	1	1	1	1	0.362802	0.261569	0.308045	Plants	-0.101232	True
10994	normal	normal	AMBTC	W1PNL9	W1PDE3	SELML	D8SH24	1	1	-1	1	-1	1	0.450216	0.386355	0.0543012	Plants	-0.063861	True
10994	normal	normal	AMBTC	W1PNL9	W1P859	SELML	D8SH24	-1	1	-1	1	1	1	0.450216	0.409544	0.0543012	Plants	-0.0406724	True
10994	normal	normal	AMBTC	W1PNL9	W1PLS8	SELML	D8SH24	-1	1	-1	1	1	1	0.450216	0.215939	0.0543012	Plants	-0.234277	True
10994	normal	normal	AMBTC	W1PNL9	W1NQQ5	SELML	D8SH24	1	1	-1	1	-1	1	0.450216	0.30391	0.0543012	Plants	-0.146306	True
10994	normal	normal	AMBTC	W1PNL9	W1P368	SELML	D8SH24	1	1	-1	1	-1	1	0.450216	0.265598	0.0543012	Plants	-0.184619	True
11002	normal	normal	AMBTC	W1PFE6	W1P036	SELML	D8RL10	-1	1	1	1	-1	1	0.345779	0.461092	0.371106	Plants	0.115313	True
11003	normal	normal	AMBTC	W1NWJ8	W1NHD8	SELML	D8RZP3	-1	1	1	1	-1	1	0.265772	0.579309	0.158834	Plants	0.313538	True
11011	normal	normal	AMBTC	W1P942	W1PZQ7	SELML	D8RU98	-1	1	1	1	-1	1	0.956316	0.84964	0.964401	Plants	-0.106676	True
11014	normal	normal	AMBTC	W1NTR6	W1PKC8	SELML	D8RBI5	-1	1	1	1	-1	1	0.358237	0.391279	0.20957	Plants	0.0330421	True
11040	normal	normal	AMBTC	W1PKL7	W1PJW0	SELML	D8SQ63	-1	1	-1	1	1	1	0.166354	0.82529	0.15607	Plants	0.658937	True
11040	normal	normal	AMBTC	U5D4L1	U5DGX0	SELML	D8SD96	-1	1	-1	1	1	1	0.315805	0.469126	0.0631427	Plants	0.153322	True
11040	normal	normal	AMBTC	U5D4L1	U5CY57	SELML	D8SD96	1	1	-1	1	-1	1	0.315805	0.69265	0.0631427	Plants	0.376846	True
11040	normal	normal	AMBTC	U5D4L1	W1PC88	SELML	D8SD96	-1	1	-1	1	1	1	0.315805	0.358222	0.0631427	Plants	0.0424179	True
11054	normal	normal	AMBTC	W1PRS0	U5CX26	SELML	D8SZN4	1	1	1	1	1	1	0.297689	0.3012	0.206853	Plants	0.00351082	True
11062	normal	normal	AMBTC	W1NG58	W1NQX4	SELML	D8SXQ8	1	1	1	1	1	1	0.485761	0.550712	0.187832	Plants	0.064951	True
11062	normal	normal	AMBTC	W1PG19	U5CXI9	SELML	D8R0F2	1	1	-1	1	-1	1	0.776168	0.934064	0.0969674	Plants	0.157896	True
11062	normal	normal	AMBTC	W1PG19	U5CXJ7	SELML	D8R0F2	-1	1	-1	1	1	1	0.776168	0.794338	0.0969674	Plants	0.0181697	True
11108	normal	normal	AMBTC	W1NKQ0	U5D238	SELML	D8R742	-1	1	1	1	-1	1	0.447441	0.293633	0.138857	Plants	-0.153808	True
11119	normal	normal	AMBTC	W1PYP2	U5CW71	SELML	D8SQ31	1	1	1	1	1	1	0.434727	0.500356	0.127628	Plants	0.0656292	True
11119	normal	normal	AMBTC	W1NK09	U5DDX9	SELML	D8T4D2	1	1	-1	1	-1	1	0.581414	0.59329	0.451592	Plants	0.0118758	True
11119	normal	normal	AMBTC	W1NK09	W1NW97	SELML	D8T4D2	1	1	-1	1	-1	1	0.581414	0.347725	0.451592	Plants	-0.233689	True
11119	normal	normal	AMBTC	W1NK09	W1NRP2	SELML	D8T4D2	1	1	-1	1	-1	1	0.581414	0.460782	0.451592	Plants	-0.120632	True
11119	normal	normal	AMBTC	W1NK09	U5CZ62	SELML	D8T4D2	1	1	-1	1	-1	1	0.581414	0.574784	0.451592	Plants	-0.0066298	True
11122	normal	normal	AMBTC	W1PIB2	W1Q0X0	SELML	D8QWH7	-1	1	1	1	-1	1	0.184217	0.290987	0.2268	Plants	0.10677	True
11122	normal	normal	AMBTC	W1PIB2	W1PTB9	SELML	D8QWH7	1	1	1	1	1	1	0.184217	0.676881	0.2268	Plants	0.492664	True
11132	normal	normal	AMBTC	W1NXA5	W1Q0I1	SELML	D8QNT1	-1	1	1	1	-1	1	0.577175	0.523363	0.013297	Plants	-0.0538119	True
11132	normal	normal	AMBTC	U5DAK5	U5D0D9	SELML	D8QPB7	-1	1	1	1	-1	1	0.243347	0.716629	0.248682	Plants	0.473282	True
11132	normal	normal	AMBTC	W1PBB8	W1PC52	SELML	D8R3J5	1	1	1	1	1	1	0.192351	0.381369	0.0655666	Plants	0.189018	True
11132	normal	normal	AMBTC	W1P939	W1PMI3	SELML	D8S5T7	1	1	1	1	1	1	0.291151	0.79501	0.0772253	Plants	0.503859	True
11132	normal	normal	AMBTC	W1PPV2	U5DBF4	SELML	D8SQM2	1	1	1	1	1	1	0.402018	0.449046	0.0582738	Plants	0.0470287	True
11136	normal	normal	AMBTC	W1PDH1	W1PJ91	SELML	D8QMQ8	-1	1	-1	1	1	1	0.441572	0.345723	0.703407	Plants	-0.0958494	True
11141	normal	normal	AMBTC	W1NJI6	U5CQY5	SELML	D8R5T0	-1	1	1	1	-1	1	0.247764	0.246247	0.0452491	Plants	-0.00151707	True
11157	normal	normal	AMBTC	W1PKF5	U5DB29	SELML	D8TBF2	-1	1	-1	1	1	1	0.644687	0.309838	0.076501	Plants	-0.334849	True
11183	normal	normal	AMBTC	U5DCH5	W1NJW3	SELML	D8T3N3	1	1	-1	1	-1	1	0.449146	0.877938	0.240188	Plants	0.428792	True
11206	normal	normal	AMBTC	W1PCG4	W1PDE8	SELML	D8QNE2	-1	1	-1	1	1	1	0.579553	0.44232	0.442517	Plants	-0.137232	True
11206	normal	normal	AMBTC	W1PCG4	U5CXX6	SELML	D8QNE2	1	1	-1	1	-1	1	0.579553	0.342949	0.442517	Plants	-0.236604	True
11206	normal	normal	AMBTC	U5CW70	W1PAR6	SELML	D8SD92	-1	1	1	1	-1	1	0.69991	0.91404	0.15408	Plants	0.214131	True
11208	normal	normal	AMBTC	U5DCY0	W1P999	SELML	D8RS18	1	1	1	1	1	1	0.265393	0.486458	0.101624	Plants	0.221065	True
11208	normal	normal	AMBTC	U5DCY0	U5DF87	SELML	D8RS18	-1	1	1	1	-1	1	0.265393	0.380714	0.101624	Plants	0.115321	True
11214	normal	normal	AMBTC	W1NV59	W1NZX7	SELML	D8RWA4	-1	1	1	1	-1	1	0.297118	0.277942	0.0416764	Plants	-0.019176	True
11214	normal	normal	AMBTC	W1P6Q1	W1NH52	SELML	D8SVH6	1	1	1	1	1	1	0.732312	0.600275	0.0679472	Plants	-0.132037	True
11214	normal	normal	AMBTC	W1PA71	U5CMF5	SELML	D8SLD2	1	1	1	1	1	1	0.31764	0.395944	0.0469512	Plants	0.0783039	True
11214	normal	normal	AMBTC	U5DC62	W1Q0Y8	SELML	D8S4B7	1	1	1	1	1	1	0.320066	0.477924	0.0999333	Plants	0.157858	True
11214	normal	normal	AMBTC	W1PMA7	W1NWU9	SELML	D8S234			1	1			0.24186	0.822818	0.0491971	Plants	0.580959	True
11214	normal	normal	AMBTC	W1PMA7	W1P306	SELML	D8S234	1	1	1	1	1	1	0.24186	0.551307	0.0491971	Plants	0.309448	True
11220	normal	normal	AMBTC	W1P437	U5CW10	SELML	D8R2V0	-1	1	-1	1	1	1	0.38307	0.439021	0.195309	Plants	0.0559506	True
11227	normal	normal	AMBTC	W1P9C0	U5D3J6	SELML	D8RGP5	1	1	1	1	1	1	0.213026	0.189687	0.0792018	Plants	-0.0233392	True
11254	normal	normal	AMBTC	U5DAJ3	U5CMH7	SELML	D8T159	-1	1	-1	1	1	1	0.375644	0.254647	0.183781	Plants	-0.120997	True
11255	normal	normal	AMBTC	W1NS86	U5DFF5	SELML	D8RSG5	1	1	-1	1	-1	1	0.609221	0.480576	0.1368	Plants	-0.128645	True
11260	normal	normal	AMBTC	W1NVG0	W1NQ43	SELML	D8RR97	1	1	-1	1	-1	1	0.262474	0.42303	0.127862	Plants	0.160556	True
11260	normal	normal	AMBTC	W1NVG0	W1PUT4	SELML	D8RR97	-1	1	-1	1	1	1	0.262474	0.533681	0.127862	Plants	0.271207	True
11260	normal	normal	AMBTC	W1NVG0	W1NWG6	SELML	D8RR97	1	1	-1	1	-1	1	0.262474	0.704963	0.127862	Plants	0.442489	True
11260	normal	normal	AMBTC	W1NVG0	W1NM19	SELML	D8RR97	1	1	-1	1	-1	1	0.262474	0.9166	0.127862	Plants	0.654125	True
11266	normal	normal	AMBTC	U5DER1	U5D5D1	SELML	D8SIY3	-1	1	1	1	-1	1	0.301977	0.55848	0.0754344	Plants	0.256503	True
11352	normal	normal	AMBTC	W1NI23	W1PPJ2	SELML	D8SBJ8	1	1	-1	1	-1	1	0.508312	0.63957	0.237666	Plants	0.131258	True
11359	normal	normal	AMBTC	W1PCG3	W1P1C2	SELML	D8R9K0	1	1	1	1	1	1	0.384313	0.439008	0.164162	Plants	0.0546951	True
11362	normal	normal	AMBTC	W1P971	U5D3E6	SELML	D8SRU3	-1	1	-1	1	1	1	0.761293	0.772481	0.599662	Plants	0.011188	True
11362	normal	normal	AMBTC	W1P971	W1NUA1	SELML	D8SRU3	1	1	-1	1	-1	1	0.761293	0.959771	0.599662	Plants	0.198478	True
11406	normal	normal	AMBTC	U5DGY2	U5DBW2	SELML	D8RMZ2	-1	1	1	1	-1	1	0.359728	0.114508	0.165115	Plants	-0.24522	True
11413	normal	normal	AMBTC	W1NUZ1	U5CY66	SELML	D8S4N5			1	1			0.173818		0.180502	Plants		True
11426	normal	normal	AMBTC	W1PKL8	U5D3L5	SELML	D8QUA3	1	1	-1	1	-1	1	0.511585	0.422371	0.601699	Plants	-0.0892141	True
11440	normal	normal	AMBTC	U5D8V8	W1PMG6	SELML	D8QRR6	-1	1	-1	1	1	1	0.442926	0.320318	0.141183	Plants	-0.122608	True
11440	normal	normal	AMBTC	U5D0I9	U5D3D9	SELML	D8SJ51	1	1	1	1	1	1	0.354632	0.275051	0.299791	Plants	-0.0795808	True
11449	normal	normal	AMBTC	W1NIG0	W1NUP4	SELML	D8SRB8	1	1	1	1	1	1	0.356857	0.173028	0.181214	Plants	-0.183829	True
11452	normal	normal	AMBTC	W1PQA0	W1PJS8	SELML	D8QPT1	1	1	-1	1	-1	1	0.600614	0.558584	0.0925336	Plants	-0.0420306	True
11453	normal	normal	AMBTC	W1P5Y4	W1P6H9	SELML	D8QUK8	1	1	1	1	1	1	0.584935	0.584771	0.214068	Plants	-0.000164357	True
11453	normal	normal	AMBTC	W1P5Y4	U5D1S0	SELML	D8QUK8	1	1	1	1	1	1	0.584935	0.637133	0.214068	Plants	0.0521983	True
11467	normal	normal	AMBTC	W1P1G4	W1P0W0	SELML	D8SA40	-1	1	1	1	-1	1	0.198524	0.386276	0.152462	Plants	0.187752	True
11467	normal	normal	AMBTC	W1P1G4	U5CMT7	SELML	D8SA40	1	1	1	1	1	1	0.198524	0.747781	0.152462	Plants	0.549257	True
11467	normal	normal	AMBTC	W1P1G4	U5D3K3	SELML	D8SA40	-1	1	1	1	-1	1	0.198524	0.335128	0.152462	Plants	0.136604	True
11514	normal	normal	AMBTC	W1NVY0	W1Q0R8	SELML	D8SW86	1	1	-1	1	-1	1	0.308275	0.514579	0.082876	Plants	0.206304	True
11514	normal	normal	AMBTC	W1NVY0	W1NNW7	SELML	D8SW86	-1	1	-1	1	1	1	0.308275	0.803648	0.082876	Plants	0.495372	True
11514	normal	normal	AMBTC	W1NVY0	W1NU90	SELML	D8SW86	1	1	-1	1	-1	1	0.308275	0.345933	0.082876	Plants	0.0376575	True
11524	normal	normal	AMBTC	U5CR73	W1NZ19	SELML	D8RWP2	-1	1	1	1	-1	1	0.304435	0.233868	0.175932	Plants	-0.0705668	True
11527	normal	normal	AMBTC	W1NFA8	W1NYL8	SELML	D8RXW4	1	1	1	1	1	1	0.400094	0.921665	0.723692	Plants	0.521571	True
11527	normal	normal	AMBTC	W1NFA8	W1PX51	SELML	D8RXW4	1	1	1	1	1	1	0.400094	0.589708	0.723692	Plants	0.189614	True
11527	normal	normal	AMBTC	W1NFU9	U5DGT4	SELML	D8RYL7	-1	1	1	1	-1	1	0.934198	0.38123	0.690355	Plants	-0.552968	True
11527	normal	normal	AMBTC	W1NFU9	U5D569	SELML	D8RYL7	-1	1	1	1	-1	1	0.934198	0.554607	0.690355	Plants	-0.379592	True
11528	normal	normal	AMBTC	W1PSE3	W1P7C0	SELML	D8TAK0	1	1	1	1	1	1	0.471904	0.39969	0.084722	Plants	-0.0722148	True
11528	normal	normal	AMBTC	W1NLW5	U5D9W5	SELML	D8SDB6	-1	1	-1	1	1	1	0.446724	0.214205	0.114018	Plants	-0.232519	True
11550	normal	normal	AMBTC	U5DIZ3	U5CU14	SELML	D8RLY5	1	1	-1	1	-1	1	0.346444	0.483202	0.171769	Plants	0.136757	True
11558	normal	normal	AMBTC	U5DCG1	W1PW86	SELML	D8RS72	1	1	1	1	1	1	0.36352	0.544217	0.193761	Plants	0.180698	True
11566	normal	normal	AMBTC	W1NTW8	W1PVR2	SELML	D8SVZ5	1	1	1	1	1	1	0.2828	0.205137	0.086474	Plants	-0.0776624	True
11566	normal	normal	AMBTC	W1NTW8	W1PUK2	SELML	D8SVZ5	1	1	1	1	1	1	0.2828	0.534935	0.086474	Plants	0.252135	True
11570	normal	normal	AMBTC	W1PB32	W1NG83	SELML	D8RS12	-1	1	-1	1	1	1	0.307682	0.278807	0.308067	Plants	-0.028875	True
11570	normal	normal	AMBTC	W1PB32	W1PX66	SELML	D8RS12	1	1	-1	1	-1	1	0.307682	0.6629	0.308067	Plants	0.355217	True
11588	normal	normal	AMBTC	U5D348	W1P311	SELML	D8QNM6	1	1	1	1	1	1	0.186592	0.278197	0.202385	Plants	0.0916044	True
11588	normal	normal	AMBTC	W1PQX2	W1NHZ7	SELML	D8QX25	1	1	-1	1	-1	1	0.588774	0.332556	0.229918	Plants	-0.256218	True
11588	normal	normal	AMBTC	W1PQX2	W1NE84	SELML	D8QX25	1	1	-1	1	-1	1	0.588774	0.215464	0.229918	Plants	-0.37331	True
11588	normal	normal	AMBTC	W1PQX2	W1NIS3	SELML	D8QX25	1	1	-1	1	-1	1	0.588774	0.268746	0.229918	Plants	-0.320027	True
11592	normal	normal	AMBTC	W1NIN7	W1PW69	SELML	D8SJ05	-1	1	1	1	-1	1	0.258808	0.672061	0.0606578	Plants	0.413253	True
11595	normal	normal	AMBTC	W1PPQ0	U5CN57	SELML	D8T6B0	1	1	1	1	1	1	0.240799	0.131949	0.127774	Plants	-0.108849	True
11606	normal	normal	AMBTC	W1P0J9	W1NDU7	SELML	D8TB19	1	1	1	1	1	1	0.535615	0.314792	0.135715	Plants	-0.220823	True
11607	normal	normal	AMBTC	W1PGE1	W1NSD0	SELML	D8QZD8	-1	1	-1	1	1	1	0.418928	0.55924	0.0867396	Plants	0.140313	True
11614	normal	normal	AMBTC	W1PAD5	W1P8P3	SELML	D8SB16	1	1	1	1	1	1	0.156655	0.501181	0.115432	Plants	0.344526	True
11614	normal	normal	AMBTC	W1PIZ2	W1PKR7	SELML	D8TA66	-1	1	-1	1	1	1	0.640953	0.500706	0.123797	Plants	-0.140247	True
11614	normal	normal	AMBTC	W1PWI6	U5D3N5	SELML	D8R543	-1	1	-1	1	1	1	0.604395	0.449263	0.267312	Plants	-0.155132	True
11614	normal	normal	AMBTC	W1PLW9	U5D452	SELML	D8RGA7	1	1	1	1	1	1	0.359521	0.240768	0.0560294	Plants	-0.118753	True
11627	normal	normal	AMBTC	W1NLZ8	W1PF21	SELML	D8RHD1	-1	1	-1	1	1	1	0.224484	0.485896	0.128827	Plants	0.261412	True
11629	normal	normal	AMBTC	W1NL63	W1PB44	SELML	D8SZB7	1	1	-1	1	-1	1	0.233719	0.403978	0.0584703	Plants	0.170259	True
11649	normal	normal	AMBTC	W1NRQ5	U5CZ20	SELML	D8T7B3	1	1	1	1	1	1	0.572399	0.464291	0.177748	Plants	-0.108108	True
11652	normal	normal	AMBTC	W1PHX6	W1PAF2	SELML	D8R982	1	1	1	1	1	1	0.157082	0.157407	0.198729	Plants	0.000324608	True
11654	normal	normal	AMBTC	W1PJY4	W1NRD8	SELML	D8TAG5	-1	1	1	1	-1	1	0.612644	0.973409	0.471955	Plants	0.360765	True
11654	normal	normal	AMBTC	W1PJY4	W1NTW0	SELML	D8TAG5	-1	1	1	1	-1	1	0.612644	0.829339	0.471955	Plants	0.216695	True
11654	normal	normal	AMBTC	W1PJY4	W1P1B7	SELML	D8TAG5	1	1	1	1	1	1	0.612644	0.548132	0.471955	Plants	-0.0645118	True
11654	normal	normal	AMBTC	W1PJY4	W1P137	SELML	D8TAG5	1	1	1	1	1	1	0.612644	0.813861	0.471955	Plants	0.201217	True
11654	normal	normal	AMBTC	W1P7Y3	W1P4M6	SELML	D8S585	1	1					0.701755	0.64072		Plants	-0.0610345	True
11654	normal	normal	AMBTC	W1NWQ3	W1P3C3	SELML	D8RGN0	1	1	-1	1	-1	1	0.7999	0.994111	0.346317	Plants	0.194211	True
11654	normal	normal	AMBTC	W1NWQ3	W1PR01	SELML	D8RGN0	1	1	-1	1	-1	1	0.7999	0.917874	0.346317	Plants	0.117974	True
11654	normal	normal	AMBTC	W1P5H2	W1NYB5	SELML	D8S6H7	-1	1	1	1	-1	1	0.516333	0.928366	0.456213	Plants	0.412033	True
11654	normal	normal	AMBTC	W1PG78	W1PCI7	SELML	D8T4B4	1	1	1	1	1	1	0.530746	0.500535	0.631201	Plants	-0.0302113	True
11654	normal	normal	AMBTC	W1PG78	W1PST3	SELML	D8T4B4	-1	1	1	1	-1	1	0.530746	0.20652	0.631201	Plants	-0.324226	True
11654	normal	normal	AMBTC	W1PNR4	W1NQI1	SELML	D8RMW0	1	1	-1	1	-1	1	0.301979	0.587647	0.276689	Plants	0.285669	True
11654	normal	normal	AMBTC	W1PNR4	W1PNI0	SELML	D8RMW0	1	1	-1	1	-1	1	0.301979	0.695191	0.276689	Plants	0.393212	True
11654	normal	normal	AMBTC	W1PNR4	W1PW93	SELML	D8RMW0	-1	1	-1	1	1	1	0.301979	0.920747	0.276689	Plants	0.618769	True
11662	normal	normal	AMBTC	W1PNQ1	W1PI87	SELML	D8QMS2	-1	1	-1	1	1	1	0.647077	0.476318	0.276376	Plants	-0.170758	True
11662	normal	normal	AMBTC	W1PPU1	W1NII8	SELML	D8S6L2	1	1	1	1	1	1	0.629127	0.63257	0.38113	Plants	0.00344252	True
11668	normal	normal	AMBTC	W1P294	W1P9L9	SELML	D8T291	-1	1	-1	1	1	1	0.280802	0.511556	0.050728	Plants	0.230754	True
11668	normal	normal	AMBTC	W1P294	W1NI78	SELML	D8T291	-1	1	-1	1	1	1	0.280802	0.146352	0.050728	Plants	-0.13445	True
11669	normal	normal	AMBTC	W1NWT7	W1PZD3	SELML	D8QZZ4	-1	1	-1	1	1	1	0.566788	0.652842	0.102825	Plants	0.0860531	True
11669	normal	normal	AMBTC	W1NWT7	W1PUG8	SELML	D8QZZ4	1	1	-1	1	-1	1	0.566788	0.667984	0.102825	Plants	0.101196	True
11669	normal	normal	AMBTC	W1NWT7	W1NNV7	SELML	D8QZZ4	1	1	-1	1	-1	1	0.566788	0.410148	0.102825	Plants	-0.156641	True
11670	normal	normal	AMBTC	W1NSR4	W1NLB8	SELML	D8SB74	-1	1	1	1	-1	1	0.245005	0.283353	0.0837442	Plants	0.038348	True
11673	normal	normal	AMBTC	U5DE55	W1P9E6	SELML	D8R032	-1	1	-1	1	1	1	0.17861	0.258102	0.0633596	Plants	0.079492	True
11685	normal	normal	AMBTC	W1PAK0	U5D098	SELML	D8SXD4	-1	1	1	1	-1	1	0.195693	0.408398	0.211737	Plants	0.212705	True
11686	normal	normal	AMBTC	W1NF36	W1P045	SELML	D8SA21	1	1	-1	1	-1	1	0.326855	0.996749	0.317383	Plants	0.669894	True
11689	normal	normal	AMBTC	W1NVS8	W1PQL9	SELML	D8SQP8	-1	1	-1	1	1	1	0.484094	0.5883	0.075405	Plants	0.104206	True
11689	normal	normal	AMBTC	W1NVS8	U5CW26	SELML	D8SQP8	1	1	-1	1	-1	1	0.484094	0.359628	0.075405	Plants	-0.124467	True
11706	normal	normal	AMBTC	W1NVH1	W1P7S2	SELML	D8S4K8	1	1	1	1	1	1	0.345912	0.82967	0.133485	Plants	0.483758	True
11709	normal	normal	AMBTC	W1NGX9	W1NFT0	SELML	D8T7R1	1	1	-1	1	-1	1	0.7429	0.473161	0.468175	Plants	-0.269739	True
11709	normal	normal	AMBTC	W1NGX9	W1P4R1	SELML	D8T7R1	1	1	-1	1	-1	1	0.7429	0.795799	0.468175	Plants	0.0528987	True
11709	normal	normal	AMBTC	W1NGX9	U5D121	SELML	D8T7R1	1	1	-1	1	-1	1	0.7429	0.754749	0.468175	Plants	0.0118495	True
11709	normal	normal	AMBTC	W1PCV3	W1NID6	SELML	D8S0U4	-1	1	1	1	-1	1	0.877556	0.834411	0.348488	Plants	-0.0431449	True
11709	normal	normal	AMBTC	W1PCV3	W1PQW4	SELML	D8S0U4	-1	1	1	1	-1	1	0.877556	0.859462	0.348488	Plants	-0.0180943	True
11709	normal	normal	AMBTC	W1P4Q5	W1PMP1	SELML	D8SMQ7	1	1	1	1	1	1	0.606478	0.480289	0.223028	Plants	-0.126189	True
11712	normal	normal	AMBTC	W1PH81	W1Q122	SELML	D8R1E0	1	1	1	1	1	1	0.260272	0.557779	0.168248	Plants	0.297507	True
11715	normal	normal	AMBTC	U5D0M9	W1PQ01	SELML	D8SC67	-1	1	-1	1	1	1	0.206558	0.526223	0.142102	Plants	0.319665	True
11727	normal	normal	AMBTC	W1PQQ7	W1P2T0	SELML	D8SFS3	1	1	-1	1	-1	1	0.395246	0.613061	0.0859986	Plants	0.217815	True
11732	normal	normal	AMBTC	W1PSN8	W1NYN6	SELML	D8SXF9	-1	1	-1	1	1	1	0.556227	0.875493	0.13486	Plants	0.319267	True
11740	normal	normal	AMBTC	W1NTX4	W1P960	SELML	D8SA44	1	1	-1	1	-1	1	0.124804	0.234101	0.0830158	Plants	0.109297	True
11743	normal	normal	AMBTC	W1P9X3	W1PJM2	SELML	D8RPV4	1	1	1	1	1	1	0.302652	0.445124	0.28099	Plants	0.142471	True
11743	normal	normal	AMBTC	W1P9X3	W1NYT6	SELML	D8RPV4	1	1	1	1	1	1	0.302652	0.19098	0.28099	Plants	-0.111672	True
11758	normal	normal	AMBTC	W1PSF0	U5CZL6	SELML	D8RPG1	-1	1	-1	1	1	1	0.128897	0.246156	0.171603	Plants	0.117259	True
11771	normal	normal	AMBTC	W1Q0W6	W1PUA6	SELML	D8QNB6	-1	1	-1	1	1	1	0.552617	0.571702	0.121517	Plants	0.0190843	True
11771	normal	normal	AMBTC	W1Q0W6	W1PMR3	SELML	D8QNB6	-1	1	-1	1	1	1	0.552617	0.405458	0.121517	Plants	-0.147159	True
11772	normal	normal	AMBTC	W1NJF2	W1PDZ5	SELML	D8QYR0	-1	1	1	1	-1	1	0.284666	0.460102	0.0762487	Plants	0.175436	True
11776	normal	normal	AMBTC	W1P4H9	W1NES7	SELML	D8T1L7	1	1	-1	1	-1	1	0.262861	0.308887	0.148201	Plants	0.0460263	True
11787	normal	normal	AMBTC	U5D3J5	U5D227	SELML	D8T0M5	-1	1	1	1	-1	1	0.308434	0.635596	0.0713461	Plants	0.327162	True
11802	normal	normal	AMBTC	W1PIW4	W1PGF2	SELML	D8QV65	1	1	-1	1	-1	1	0.463349	0.356302	0.374449	Plants	-0.107047	True
11802	normal	normal	AMBTC	W1PIW4	W1PVV3	SELML	D8QV65	-1	1	-1	1	1	1	0.463349	0.452316	0.374449	Plants	-0.0110333	True
11802	normal	normal	AMBTC	W1PK78	W1PHG1	SELML	D8QPJ4	-1	1	-1	1	1	1	0.673336	0.449031	0.243643	Plants	-0.224304	True
11802	normal	normal	AMBTC	W1PK78	W1PGK2	SELML	D8QPJ4	1	1	-1	1	-1	1	0.673336	0.420504	0.243643	Plants	-0.252832	True
11802	normal	normal	AMBTC	W1PK78	W1P8S9	SELML	D8QPJ4	1	1	-1	1	-1	1	0.673336	0.877632	0.243643	Plants	0.204296	True
11802	normal	normal	AMBTC	W1PK78	W1PQD4	SELML	D8QPJ4	1	1	-1	1	-1	1	0.673336	0.806383	0.243643	Plants	0.133047	True
11802	normal	normal	AMBTC	W1PK78	W1P642	SELML	D8QPJ4	-1	1	-1	1	1	1	0.673336	0.698016	0.243643	Plants	0.0246806	True
11802	normal	normal	AMBTC	W1PK78	W1NPB9	SELML	D8QPJ4	1	1	-1	1	-1	1	0.673336	0.998858	0.243643	Plants	0.325523	True
11802	normal	normal	AMBTC	W1PK78	U5CX91	SELML	D8QPJ4	-1	1	-1	1	1	1	0.673336	0.755013	0.243643	Plants	0.081677	True
11811	normal	normal	AMBTC	U5D8X3	U5D9M0	SELML	D8R545	1	1	1	1	1	1	0.363198	0.219637	0.0858665	Plants	-0.143561	True
11814	normal	normal	AMBTC	W1NFH8	W1NEP5	SELML	D8SC46	1	1	-1	1	-1	1	0.371505	0.622724	0.2938	Plants	0.251219	True
11814	normal	normal	AMBTC	W1NFH8	W1PE78	SELML	D8SC46	-1	1	-1	1	1	1	0.371505	0.837095	0.2938	Plants	0.46559	True
11814	normal	normal	AMBTC	W1NFH8	W1NFY0	SELML	D8SC46	1	1	-1	1	-1	1	0.371505	0.721441	0.2938	Plants	0.349936	True
11814	normal	normal	AMBTC	W1NFH8	W1P1N7	SELML	D8SC46	1	1	-1	1	-1	1	0.371505	0.458782	0.2938	Plants	0.0872762	True
11814	normal	normal	AMBTC	W1NFH8	W1PE83	SELML	D8SC46	-1	1	-1	1	1	1	0.371505	0.711248	0.2938	Plants	0.339742	True
11817	normal	normal	AMBTC	W1PTA9	U5DHI4	SELML	D8R256	1	1	1	1	1	1	0.360701	0.317125	0.0953376	Plants	-0.0435768	True
11817	normal	normal	AMBTC	W1PPZ6	W1PBP5	SELML	D8SK58	1	1	1	1	1	1	0.333743	0.492622	0.138456	Plants	0.15888	True
11817	normal	normal	AMBTC	W1NV14	U5CVS3	SELML	D8SPP5	1	1	-1	1	-1	1	0.318242	0.247937	0.0501855	Plants	-0.0703053	True
11817	normal	normal	AMBTC	W1PR98	W1NNF7	SELML	D8SKP8	1	1	1	1	1	1	0.334169	0.363784	0.0250825	Plants	0.0296143	True
11822	normal	normal	AMBTC	U5DCQ0	W1P6Z2	SELML	D8SDL9	-1	1	1	1	-1	1	0.180777	0.177714	0.095112	Plants	-0.00306362	True
11839	normal	normal	AMBTC	W1P0V6	U5D129	SELML	D8SG97	1	1	1	1	1	1	0.416879	0.35777	0.199583	Plants	-0.0591089	True
11845	normal	normal	AMBTC	W1PJ53	W1PF78	SELML	D8STV3	1	1	1	1	1	1	0.310341	0.285955	0.0694092	Plants	-0.0243858	True
11850	normal	normal	AMBTC	W1PT02	W1NL03	SELML	D8TAX1	1	1	1	1	1	1	0.426296	0.373161	0.232416	Plants	-0.053135	True
11850	normal	normal	AMBTC	W1PKD2	W1P515	SELML	D8S2C7	-1	1	-1	1	1	1	0.737327	0.762874	0.497367	Plants	0.0255474	True
11850	normal	normal	AMBTC	W1PKD2	W1P2I3	SELML	D8S2C7	1	1	-1	1	-1	1	0.737327	0.692933	0.497367	Plants	-0.0443939	True
11850	normal	normal	AMBTC	W1PKD2	W1NR95	SELML	D8S2C7	1	1	-1	1	-1	1	0.737327	0.748914	0.497367	Plants	0.0115874	True
11850	normal	normal	AMBTC	U5D0Z5	W1NKY8	SELML	D8RU42	1	1	1	1	1	1	0.500067	0.656876	0.204166	Plants	0.156809	True
11850	normal	normal	AMBTC	U5D0Z5	W1NI56	SELML	D8RU42	1	1	1	1	1	1	0.500067	0.631727	0.204166	Plants	0.13166	True
11850	normal	normal	AMBTC	U5D0Z5	W1P0U2	SELML	D8RU42	1	1	1	1	1	1	0.500067	0.341611	0.204166	Plants	-0.158456	True
11850	normal	normal	AMBTC	U5D0Z5	W1PW03	SELML	D8RU42	1	1	1	1	1	1	0.500067	0.664505	0.204166	Plants	0.164438	True
11850	normal	normal	AMBTC	U5D0Z5	U5D5A0	SELML	D8RU42	1	1	1	1	1	1	0.500067	0.670574	0.204166	Plants	0.170508	True
11851	normal	normal	AMBTC	U5D1S3	U5CZ12	SELML	D8SW59	1	1	1	1	1	1	0.487347	0.282191	0.105589	Plants	-0.205156	True
11851	normal	normal	AMBTC	W1NS84	U5D2G9	SELML	D8RE06	1	1	1	1	1	1	0.135164	0.620612	0.0945971	Plants	0.485447	True
11863	normal	normal	AMBTC	W1PYD5	W1NEZ7	SELML	D8R8H2	1	1	1	1	1	1	0.311736	0.228955	0.0889541	Plants	-0.0827806	True
11871	normal	normal	AMBTC	U5D243	W1NYQ2	SELML	D8T2I4	-1	1	1	1	-1	1	0.309969	0.519086	0.0494704	Plants	0.209117	True
11877	normal	normal	AMBTC	W1NXZ8	U5D7K1	SELML	D8SQD7	-1	1	1	1	-1	1	0.723374	0.827276	0.996031	Plants	0.103902	True
11886	normal	normal	AMBTC	W1NV92	W1P7D4	SELML	D8QV98	1	1	1	1	1	1	0.393202	0.890342	0.399036	Plants	0.49714	True
11886	normal	normal	AMBTC	W1NG56	W1P3R9	SELML	D8SY93	-1	1	-1	1	1	1	0.363536	0.721829	0.223625	Plants	0.358293	True
11903	normal	normal	AMBTC	W1NXW2	W1NSE1	SELML	D8QQX3	1	1	-1	1	-1	1	0.785168	0.713662	0.166192	Plants	-0.0715062	True
11909	normal	normal	AMBTC	U5CPN8	W1P7J9	SELML	D8QQC5	1	1	1	1	1	1	0.271397	0.262653	0.10014	Plants	-0.00874425	True
11909	normal	normal	AMBTC	U5CPN8	W1PTW2	SELML	D8QQC5	1	1	1	1	1	1	0.271397	0.24564	0.10014	Plants	-0.0257569	True
11909	normal	normal	AMBTC	U5CZD6	W1NU04	SELML	D8SXS4	1	1	-1	1	-1	1	0.224786	0.38566	0.0582993	Plants	0.160874	True
11913	normal	normal	AMBTC	W1PBF8	W1PKV8	SELML	D8REJ7	1	1	1	1	1	1	0.719226	0.19904	0.0363954	Plants	-0.520186	True
11913	normal	normal	AMBTC	W1PKX5	W1PKQ0	SELML	D8QVL6	1	1	-1	1	-1	1	0.271853	0.450186	0.325448	Plants	0.178332	True
11926	normal	normal	AMBTC	U5D3G1	W1NFN9	SELML	D8S2I7	1	1	1	1	1	1	0.571004	0.632775	0.220248	Plants	0.0617715	True
11926	normal	normal	AMBTC	U5D3G1	W1PE57	SELML	D8S2I7	-1	1	1	1	-1	1	0.571004	0.622953	0.220248	Plants	0.051949	True
11926	normal	normal	AMBTC	U5D3G1	U5DFQ6	SELML	D8S2I7	-1	1	1	1	-1	1	0.571004	0.855004	0.220248	Plants	0.284001	True
11926	normal	normal	AMBTC	U5CUN6	W1PX60	SELML	D8RHR8					1	1		0.574173	0.630281	Plants		True
11926	normal	normal	AMBTC	U5CUN6	U5CNG3	SELML	D8RHR8					-1	1		0.934723	0.630281	Plants		True
11937	normal	normal	AMBTC	U5D6L2	W1NVU4	SELML	D8S0X0			1	1			0.123028		0.0504849	Plants		True
11937	normal	normal	AMBTC	U5D6L2	U5D6Q9	SELML	D8S0X0	1	1	1	1	1	1	0.123028	0.212437	0.0504849	Plants	0.0894099	True
11945	normal	normal	AMBTC	W1NL13	W1NT98	SELML	D8RIH9	1	1					0.492649	0.966391	0.999602	Plants	0.473742	True
11945	normal	normal	AMBTC	W1NL13	W1PIS8	SELML	D8RIH9	-1	1					0.492649	0.462045	0.999602	Plants	-0.0306041	True
11945	normal	normal	AMBTC	W1NL13	Q5D725	SELML	D8RIH9	-1	1					0.492649	0.305244	0.999602	Plants	-0.187405	True
11945	normal	normal	AMBTC	W1NL13	W1PXS0	SELML	D8RIH9	-1	1					0.492649	0.953272	0.999602	Plants	0.460622	True
11960	normal	normal	AMBTC	U5CXZ1	U5D018	SELML	D8SVJ0	1	1	-1	1	-1	1	0.222149	0.198456	0.0491081	Plants	-0.0236935	True
11964	normal	normal	AMBTC	U5D2Y2	W1P238	SELML	D8SGD2	1	1	-1	1	-1	1	0.21476	0.247112	0.191691	Plants	0.0323528	True
11972	normal	normal	AMBTC	W1NLR2	W1PUW7	SELML	D8RY99	-1	1	-1	1	1	1	0.872084	0.75801	0.254226	Plants	-0.114073	True
11972	normal	normal	AMBTC	W1P7B1	W1NIQ4	SELML	D8RMU6	1	1	1	1	1	1	0.801473	0.711267	0.136415	Plants	-0.0902057	True
11972	normal	normal	AMBTC	W1P7B1	W1PEN5	SELML	D8RMU6	1	1	1	1	1	1	0.801473	0.721554	0.136415	Plants	-0.0799193	True
11972	normal	normal	AMBTC	W1P7B1	W1P925	SELML	D8RMU6	1	1	1	1	1	1	0.801473	0.414044	0.136415	Plants	-0.38743	True
11972	normal	normal	AMBTC	W1P7B1	W1PFH7	SELML	D8RMU6	1	1	1	1	1	1	0.801473	0.803108	0.136415	Plants	0.00163481	True
11977	normal	normal	AMBTC	W1PXT4	W1PNY7	SELML	D8S7L1	1	1	-1	1	-1	1	0.315147	0.522429	0.143034	Plants	0.207282	True
11977	normal	normal	AMBTC	W1PXT4	W1PJV7	SELML	D8S7L1	1	1	-1	1	-1	1	0.315147	0.351617	0.143034	Plants	0.0364702	True
11985	normal	normal	AMBTC	W1PQY1	W1NIE1	SELML	D8T467	1	1	1	1	1	1	0.250919	0.433988	0.0810437	Plants	0.183069	True
11995	normal	normal	AMBTC	W1NL92	U5D3A3	SELML	D8QPW6	1	1	-1	1	-1	1	0.546975	0.289039	0.0514872	Plants	-0.257936	True
11999	normal	normal	AMBTC	U5D096	W1NVB5	SELML	D8RAK9	-1	1	1	1	-1	1	0.365775	0.622463	0.197176	Plants	0.256688	True
12000	normal	normal	AMBTC	U5CYX6	W1P0Q1	SELML	D8QP71	-1	1	1	1	-1	1	0.133851	0.430748	0.393092	Plants	0.296897	True
12050	normal	normal	AMBTC	W1PZM1	U5D4N1	SELML	D8R9E7	1	1	1	1	1	1	0.205001	0.319792	0.0911893	Plants	0.114792	True
12058	normal	normal	AMBTC	W1PD86	U5D8Z7	SELML	D8RD91	1	1	1	1	1	1	0.342805	0.550149	0.0914628	Plants	0.207345	True
12064	normal	normal	AMBTC	W1NFC9	U5D7S4	SELML	D8R522	1	1	-1	1	-1	1	0.354776	0.333061	0.137244	Plants	-0.0217152	True
12121	normal	normal	AMBTC	W1PGZ8	U5CT09	SELML	D8RXR2	1	1	1	1	1	1	0.381967	0.50422	0.120513	Plants	0.122253	True
12151	normal	normal	AMBTC	U5DAW4	W1NG64	SELML	D8SHA0	-1	1	1	1	-1	1	0.430204	0.32826	0.225585	Plants	-0.101944	True
12161	normal	normal	AMBTC	W1NGN0	W1P8F9	SELML	D8QRQ1	1	1	1	1	1	1	0.293827	0.3217	0.134358	Plants	0.0278731	True
12161	normal	normal	AMBTC	W1NGN0	U5CZN9	SELML	D8QRQ1	-1	1	1	1	-1	1	0.293827	0.374977	0.134358	Plants	0.08115	True
12192	normal	normal	AMBTC	U5D9M6	W1PCB3	SELML	D8TEX5	1	1	1	1	1	1	0.253354	0.137695	0.345783	Plants	-0.115659	True
12203	normal	normal	AMBTC	W1PQ25	W1PAR3	SELML	D8RCW8	-1	1	-1	1	1	1	0.490889	0.315948	0.0786308	Plants	-0.174941	True
12210	normal	normal	AMBTC	W1PRQ2	W1NZW4	SELML	D8SWY6	1	1	-1	1	-1	1	0.351729	0.204371	0.0913907	Plants	-0.147358	True
12242	normal	normal	AMBTC	W1P444	W1P090	SELML	D8S6A9	-1	1	-1	1	1	1	0.667638	0.293228	0.188621	Plants	-0.37441	True
12265	normal	normal	AMBTC	W1PHA7	W1NGU4	SELML	D8RGI5	1	1	1	1	1	1	0.373864	0.424158	0.130664	Plants	0.0502941	True
12266	normal	normal	AMBTC	W1PUD5	W1NDX1	SELML	D8RIB0	-1	1	-1	1	1	1	0.284525	0.339327	0.0583425	Plants	0.0548016	True
12276	normal	normal	AMBTC	U5CPX1	W1PMK4	SELML	D8QRR0	-1	1	-1	1	1	1	0.334325	0.220923	0.0618254	Plants	-0.113401	True
12277	normal	normal	AMBTC	W1PUI9	U5D5U6	SELML	D8S6A7	-1	1	-1	1	1	1	0.508276	0.509332	0.0197384	Plants	0.00105574	True
12299	normal	normal	AMBTC	U5D1H8	W1PJ57	SELML	D8S726	1	1	1	1	1	1	0.266299	0.367544	0.0743712	Plants	0.101245	True
12300	normal	normal	AMBTC	W1PF23	W1Q0U9	SELML	D8RTZ3	1	1	1	1	1	1	0.643872	0.6999	0.103446	Plants	0.0560282	True
12300	normal	normal	AMBTC	W1PF23	W1NG12	SELML	D8RTZ3	1	1	1	1	1	1	0.643872	0.390575	0.103446	Plants	-0.253297	True
12321	normal	normal	AMBTC	W1NS15	W1PCA5	SELML	D8RRH6	1	1	-1	1	-1	1	0.33165	0.220421	0.0443343	Plants	-0.111229	True
12321	normal	normal	AMBTC	W1NS15	W1PMF2	SELML	D8RRH6	1	1	-1	1	-1	1	0.33165	0.182565	0.0443343	Plants	-0.149085	True
12329	normal	normal	AMBTC	W1PBL5	W1NV55	SELML	D8RX35	1	1	1	1	1	1	0.390362	0.434238	0.221192	Plants	0.0438757	True
12329	normal	normal	AMBTC	W1PBL5	U5DA30	SELML	D8RX35	1	1	1	1	1	1	0.390362	0.44192	0.221192	Plants	0.0515571	True
12377	normal	normal	AMBTC	U5D2D0	U5D7S9	SELML	D8RPB5	1	1	1	1	1	1	0.415589	0.351438	0.0791873	Plants	-0.0641507	True
12378	normal	normal	AMBTC	U5DB14	W1PL08	SELML	D8SX27	-1	1	-1	1	1	1	0.228596	0.288218	0.0840297	Plants	0.0596225	True
12378	normal	normal	AMBTC	W1NY72	U5CPW2	SELML	D8SW61	1	1	1	1	1	1	0.360002	0.381059	0.106809	Plants	0.0210564	True
12396	normal	normal	AMBTC	W1PX67	W1PQY0	SELML	D8T7N7	1	1	-1	1	-1	1	0.243632	0.204055	0.0823235	Plants	-0.0395762	True
12411	normal	normal	AMBTC	W1NL21	W1PP61	SELML	D8QNL4	1	1	1	1	1	1	0.143015	0.791258	0.118256	Plants	0.648243	True
12411	normal	normal	AMBTC	U5D5J0	W1PZA3	SELML	D8QW56	1	1	-1	1	-1	1	0.135948	0.781253	0.157218	Plants	0.645304	True
12411	normal	normal	AMBTC	U5D5J0	W1P019	SELML	D8QW56	1	1	-1	1	-1	1	0.135948	0.44115	0.157218	Plants	0.305202	True
12411	normal	normal	AMBTC	U5D5J0	W1Q0E9	SELML	D8QW56	-1	1	-1	1	1	1	0.135948	0.505033	0.157218	Plants	0.369084	True
12419	normal	normal	AMBTC	W1PYV9	W1PNY3	SELML	D8T269	1	1	-1	1	-1	1	0.406861	0.275022	0.0972263	Plants	-0.131839	True
12419	normal	normal	AMBTC	W1NGC0	W1PFG7	SELML	D8R7N7	1	1	-1	1	-1	1	0.177871	0.316288	0.132193	Plants	0.138417	True
12419	normal	normal	AMBTC	W1NGC0	U5CXC8	SELML	D8R7N7	1	1	-1	1	-1	1	0.177871	0.332853	0.132193	Plants	0.154982	True
12428	normal	normal	AMBTC	W1PJ89	W1PZW2	SELML	D8SGI9	1	1	1	1	1	1	0.290899	0.469992	0.180749	Plants	0.179093	True
12447	normal	normal	AMBTC	U5DEI4	U5CVL8	SELML	D8T9X2	1	1	-1	1	-1	1	0.497609	0.798864	0.0314126	Plants	0.301255	True
12447	normal	normal	AMBTC	U5DEI4	U5CRA2	SELML	D8T9X2	1	1	-1	1	-1	1	0.497609	0.269428	0.0314126	Plants	-0.228181	True
12460	normal	normal	AMBTC	W1NFK2	W1PEX9	SELML	D8T9Z3	-1	1	1	1	-1	1	0.35201	0.395482	0.11146	Plants	0.0434718	True
12482	normal	normal	AMBTC	W1PJI9	W1NX38	SELML	D8S3F1	-1	1	-1	1	1	1	0.459058	0.336243	0.115842	Plants	-0.122815	True
12483	normal	normal	AMBTC	W1PTZ8	W1PW78	SELML	D8RZ69	-1	1	1	1	-1	1	0.186211	0.373068	0.102907	Plants	0.186857	True
12506	normal	normal	AMBTC	W1PQQ6	U5D978	SELML	D8TCC9	1	1	1	1	1	1	0.31439	0.221289	0.0645131	Plants	-0.093101	True
12506	normal	normal	AMBTC	W1PQQ6	W1PZX5	SELML	D8TCC9	-1	1	1	1	-1	1	0.31439	0.354248	0.0645131	Plants	0.0398581	True
12537	normal	normal	AMBTC	W1NGB1	W1PYD1	SELML	D8R6C6	1	1	1	1	1	1	0.265791	0.439173	0.105414	Plants	0.173382	True
12537	normal	normal	AMBTC	W1NGB1	W1PIY2	SELML	D8R6C6	1	1	1	1	1	1	0.265791	0.400258	0.105414	Plants	0.134467	True
12542	normal	normal	AMBTC	W1NW13	W1PIG8	SELML	D8RZH2	-1	1	1	1	-1	1	0.525413	0.431267	0.0499248	Plants	-0.0941456	True
12542	normal	normal	AMBTC	W1NW13	W1PMJ7	SELML	D8RZH2	1	1	1	1	1	1	0.525413	0.726191	0.0499248	Plants	0.200778	True
12542	normal	normal	AMBTC	W1NW13	W1PQ65	SELML	D8RZH2	1	1	1	1	1	1	0.525413	0.315221	0.0499248	Plants	-0.210192	True
12542	normal	normal	AMBTC	W1NW13	W1PWG9	SELML	D8RZH2	1	1	1	1	1	1	0.525413	0.501626	0.0499248	Plants	-0.0237867	True
12542	normal	normal	AMBTC	W1NW13	W1NJ63	SELML	D8RZH2	1	1	1	1	1	1	0.525413	0.340715	0.0499248	Plants	-0.184698	True
12550	normal	normal	AMBTC	W1PWU0	W1PN04	SELML	D8QU50	-1	1	-1	1	1	1	0.429952	0.388779	0.118811	Plants	-0.0411726	True
12565	normal	normal	AMBTC	W1PQP6	W1P8H8	SELML	D8R134	-1	1	1	1	-1	1	0.518393	0.644206	0.156495	Plants	0.125813	True
12565	normal	normal	AMBTC	W1PQP6	W1PUI6	SELML	D8R134	-1	1	1	1	-1	1	0.518393	0.480605	0.156495	Plants	-0.0377876	True
12565	normal	normal	AMBTC	W1PQP6	W1P9P1	SELML	D8R134	-1	1	1	1	-1	1	0.518393	0.42638	0.156495	Plants	-0.0920127	True
12570	normal	normal	AMBTC	W1P548	W1PTQ8	SELML	D8QPJ8	-1	1	-1	1	1	1	0.280973	0.428232	0.370617	Plants	0.147259	True
12570	normal	normal	AMBTC	W1P548	W1P5K8	SELML	D8QPJ8	-1	1	-1	1	1	1	0.280973	0.403666	0.370617	Plants	0.122693	True
12570	normal	normal	AMBTC	W1PS43	W1PS29	SELML	D8SJV4	1	1	-1	1	-1	1	0.157253	0.631144	0.113181	Plants	0.473891	True
12588	normal	normal	AMBTC	U5CYJ9	U5CPZ5	SELML	D8R4U3	1	1	1	1	1	1	0.664795	0.246101	0.336886	Plants	-0.418694	True
12601	normal	normal	AMBTC	W1Q0T3	W1PGJ4	SELML	D8RLI5	1	1	1	1	1	1	0.621883	0.586796	0.46615	Plants	-0.0350871	True
12612	normal	normal	AMBTC	W1PIQ5	W1NDK9	SELML	D8R4W2	1	1	1	1	1	1	0.183965	0.671664	0.177584	Plants	0.487698	True
12620	normal	normal	AMBTC	W1PT66	W1PUX5	SELML	D8RJJ5	1	1	-1	1	-1	1	0.344584	0.373988	0.0888058	Plants	0.029404	True
12626	normal	normal	AMBTC	W1PZC9	W1P7B3	SELML	D8QYP1	-1	1	-1	1	1	1	0.198075	0.555718	0.0488701	Plants	0.357643	True
12628	normal	normal	AMBTC	W1PR00	W1NN25	SELML	D8SY00	-1	1	-1	1	1	1	0.477824	0.446177	0.0605662	Plants	-0.0316466	True
12629	normal	normal	AMBTC	W1PBY5	W1PEF4	SELML	D8QNW5	1	1	1	1	1	1	0.299353	0.179382	0.222566	Plants	-0.119971	True
12629	normal	normal	AMBTC	W1PBY5	W1NJZ9	SELML	D8QNW5	1	1	1	1	1	1	0.299353	0.519792	0.222566	Plants	0.220439	True
12634	normal	normal	AMBTC	W1PKR1	W1PEI6	SELML	D8S9Q2	-1	1	-1	1	1	1	0.183095	0.369199	0.116074	Plants	0.186104	True
12654	normal	normal	AMBTC	U5D9G1	W1NWJ7	SELML	D8RGA8	-1	1	-1	1	1	1	0.556125	0.472715	0.132304	Plants	-0.0834094	True
12663	normal	normal	AMBTC	U5D0V9	U5CZ75	SELML	D8SK10	1	1	1	1	1	1	0.488879	0.343356	0.168452	Plants	-0.145522	True
12663	normal	normal	AMBTC	U5D0V9	W1PLJ6	SELML	D8SK10	-1	1	1	1	-1	1	0.488879	0.491589	0.168452	Plants	0.00271044	True
12668	normal	normal	AMBTC	W1PAZ7	U5DB82	SELML	D8T874	-1	1	1	1	-1	1	0.445767	0.396529	0.096707	Plants	-0.0492381	True
12687	normal	normal	AMBTC	W1PVT5	U5CNQ8	SELML	D8R4W0	1	1	-1	1	-1	1	0.36497	0.439396	0.0674648	Plants	0.074426	True
12702	normal	normal	AMBTC	U5D3X0	W1NX03	SELML	D8T378	-1	1	1	1	-1	1	0.315494	0.524312	0.0650846	Plants	0.208818	True
12725	normal	normal	AMBTC	W1PJU0	W1P1I8	SELML	D8QQV7	1	1	-1	1	-1	1	0.354208	0.502437	0.256082	Plants	0.14823	True
12725	normal	normal	AMBTC	W1PJU0	W1P6C7	SELML	D8QQV7	-1	1	-1	1	1	1	0.354208	0.462734	0.256082	Plants	0.108526	True
12741	normal	normal	AMBTC	U5D9P5	W1P001	SELML	D8TE42	1	1	-1	1	-1	1	0.181004	0.301011	0.168848	Plants	0.120007	True
12741	normal	normal	AMBTC	W1PMN8	W1NHC8	SELML	D8S294	-1	1	1	1	-1	1	0.598382	0.616175	0.187676	Plants	0.0177925	True
12741	normal	normal	AMBTC	W1PMN8	U5D4H1	SELML	D8S294	1	1	1	1	1	1	0.598382	0.463997	0.187676	Plants	-0.134385	True
12771	normal	normal	AMBTC	W1NWD7	W1P0J8	SELML	D8QTV7	1	1	1	1	1	1	0.182038	0.375088	0.174827	Plants	0.19305	True
12802	normal	normal	AMBTC	W1PF08	W1PUN3	SELML	D8RRU3	1	1	-1	1	-1	1	0.382816	0.370027	0.0654376	Plants	-0.0127889	True
12802	normal	normal	AMBTC	W1P9R5	U5D7V5	SELML	D8RSG6	1	1	1	1	1	1	0.227806	0.291917	0.0674792	Plants	0.0641109	True
12850	normal	normal	AMBTC	W1NGP4	U5D872	SELML	D8RLJ6	1	1	1	1	1	1	0.116136	0.196036	0.176097	Plants	0.0798999	True
12872	normal	normal	AMBTC	W1PXI1	U5DA95	SELML	D8S289	1	1	1	1	1	1	0.45812	0.50994	0.112701	Plants	0.0518198	True
12947	normal	normal	AMBTC	W1PHV5	W1PAF8	SELML	D8T1W0	1	1	1	1	1	1	0.349915	0.311974	0.0521142	Plants	-0.0379415	True
12953	normal	normal	AMBTC	W1NRW3	W1Q0K9	SELML	D8RHG5	1	1	1	1	1	1	0.3983	0.482922	0.115051	Plants	0.0846225	True
12956	normal	normal	AMBTC	W1NGU2	W1PX80	SELML	D8RUQ6	-1	1	1	1	-1	1	0.479173	0.399868	0.063406	Plants	-0.079305	True
12956	normal	normal	AMBTC	U5D9Q8	W1P649	SELML	D8R917	-1	1	1	1	-1	1	0.344113	0.373077	0.0462122	Plants	0.0289642	True
13068	normal	normal	AMBTC	W1NFR5	W1PW38	SELML	D8RFQ1	1	1	1	1	1	1	0.359077	0.465411	0.266588	Plants	0.106335	True
13068	normal	normal	AMBTC	U5D736	W1NJB1	SELML	D8RJH6	-1	1	-1	1	1	1	0.593235	0.346711	0.173807	Plants	-0.246524	True
13068	normal	normal	AMBTC	U5D736	W1PFK5	SELML	D8RJH6	1	1	-1	1	-1	1	0.593235	0.509727	0.173807	Plants	-0.0835083	True
13068	normal	normal	AMBTC	U5D736	W1NVD9	SELML	D8RJH6	1	1	-1	1	-1	1	0.593235	0.687941	0.173807	Plants	0.0947054	True
13097	normal	normal	AMBTC	U5D683	W1PK02	SELML	D8SGW9	-1	1	1	1	-1	1	0.227578	0.599939	0.0666288	Plants	0.372361	True
13140	normal	normal	AMBTC	U5D0E7	W1PU99	SELML	D8SGE3	-1	1	-1	1	1	1	0.369879	0.436056	0.0989152	Plants	0.0661775	True
13140	normal	normal	AMBTC	W1P702	W1PNJ9	SELML	D8S643	1	1	-1	1	-1	1	0.515731	0.483841	0.0649955	Plants	-0.0318897	True
13169	normal	normal	AMBTC	W1NFN6	W1PE84	SELML	D8RAQ1	1	1	1	1	1	1	0.225383	0.312264	0.0483783	Plants	0.0868806	True
13169	normal	normal	AMBTC	W1NFN6	W1NS78	SELML	D8RAQ1	1	1	1	1	1	1	0.225383	0.256373	0.0483783	Plants	0.03099	True
13268	normal	normal	AMBTC	W1PHM7	W1NX25	SELML	D8S027	-1	1	1	1	-1	1	0.240771	0.306759	0.137184	Plants	0.0659876	True
13286	normal	normal	AMBTC	U5D848	W1NID8	SELML	D8QXJ9	1	1	-1	1	-1	1	0.331284	0.356852	0.187769	Plants	0.0255678	True
13301	normal	normal	AMBTC	U5D002	U5D323	SELML	D8R581	1	1	1	1	1	1	0.421074	0.653386	0.258975	Plants	0.232313	True
13301	normal	normal	AMBTC	U5D002	W1PUL0	SELML	D8R581	1	1	1	1	1	1	0.421074	0.8261	0.258975	Plants	0.405027	True
13301	normal	normal	AMBTC	U5D002	W1PBW9	SELML	D8R581	1	1	1	1	1	1	0.421074	0.653681	0.258975	Plants	0.232608	True
13301	normal	normal	AMBTC	W1PN60	W1PL32	SELML	D8QXH9	1	1	-1	1	-1	1	0.416744	0.424508	0.0881567	Plants	0.00776412	True
13301	normal	normal	AMBTC	W1NEQ0	W1NR73	SELML	D8QPL4	1	1	-1	1	-1	1	0.75232	0.543334	0.38454	Plants	-0.208986	True
13301	normal	normal	AMBTC	W1NEQ0	U5DBY3	SELML	D8QPL4	1	1	-1	1	-1	1	0.75232	0.744332	0.38454	Plants	-0.00798716	True
13301	normal	normal	AMBTC	W1NWR2	W1P3T9	SELML	D8QPC9	1	1	-1	1	-1	1	0.411502	0.31052	0.0930857	Plants	-0.100982	True
13301	normal	normal	AMBTC	W1NWR2	W1NZS3	SELML	D8QPC9	1	1	-1	1	-1	1	0.411502	0.323424	0.0930857	Plants	-0.0880779	True
13318	normal	normal	AMBTC	W1NK61	W1P029	SELML	D8QPI6	1	1	-1	1	-1	1	0.370101	0.265874	0.0293435	Plants	-0.104227	True
13318	normal	normal	AMBTC	W1NK61	W1PNS3	SELML	D8QPI6	-1	1	-1	1	1	1	0.370101	0.382812	0.0293435	Plants	0.0127109	True
13377	normal	normal	AMBTC	U5D127	W1PIG7	SELML	D8TBX1	1	1	1	1	1	1	0.236344	0.357131	0.0797814	Plants	0.120787	True
13382	normal	normal	AMBTC	W1NL27	W1Q0S3	SELML	D8RNV8	1	1	1	1	1	1	0.398358	0.253419	0.194138	Plants	-0.144939	True
13439	normal	normal	AMBTC	W1PBB5	U5D385	SELML	D8QRS3	-1	1	1	1	-1	1	0.412379	0.334199	0.276609	Plants	-0.0781802	True
13462	normal	normal	AMBTC	W1P9N7	U5DB19	SELML	D8R9N3	-1	1	1	1	-1	1	0.32498	0.62392	0.28443	Plants	0.29894	True
13509	normal	normal	AMBTC	W1PVX1	W1PUT7	SELML	D8RB01	1	1	1	1	1	1	0.281107	0.317592	0.417412	Plants	0.0364853	True
13516	normal	normal	AMBTC	W1PL21	U5DEP1	SELML	D8S3L2	-1	1	1	1	-1	1	0.302455	0.396586	0.0298251	Plants	0.0941315	True
13520	normal	normal	AMBTC	W1NRS2	W1NG02	SELML	D8R205	1	1	1	1	1	1	0.375145	0.515551	0.0882344	Plants	0.140407	True
13547	normal	normal	AMBTC	U5D6E0	W1NSF2	SELML	D8R3H5	1	1	1	1	1	1	0.420931	0.550958	0.0417787	Plants	0.130027	True
13593	normal	normal	AMBTC	U5CX09	U5D949	SELML	D8SKW6	1	1	1	1	1	1	0.875097	0.501189	0.164845	Plants	-0.373908	True
13683	normal	normal	AMBTC	U5D7G0	W1NFT3	SELML	D8R116	-1	1					0.410871	0.435825		Plants	0.0249537	True
13683	normal	normal	AMBTC	W1Q127	W1PBW8	SELML	D8T438	1	1	1	1	1	1	0.609018	0.419971	0.0812277	Plants	-0.189046	True
13683	normal	normal	AMBTC	W1Q127	W1PNR8	SELML	D8T438	1	1	1	1	1	1	0.609018	0.616858	0.0812277	Plants	0.00784014	True
13683	normal	normal	AMBTC	W1NUP3	W1PMX6	SELML	D8RJK2	1	1	1	1	1	1	0.406329	0.268395	0.171636	Plants	-0.137933	True
13748	normal	normal	AMBTC	U5CMD6	U5CR06	SELML	D8QYT8	-1	1	1	1	-1	1	0.481025	0.385193	0.16267	Plants	-0.0958323	True
13778	normal	normal	AMBTC	W1PCQ9	U5D5V3	SELML	D8SQ62	1	1	1	1	1	1	0.470367	0.493829	0.402793	Plants	0.0234619	True
13778	normal	normal	AMBTC	W1PCQ9	U5D3K8	SELML	D8SQ62	1	1	1	1	1	1	0.470367	0.234956	0.402793	Plants	-0.235411	True
13780	normal	normal	AMBTC	W1PLF1	W1PP77	SELML	D8STQ7	1	1	-1	1	-1	1	0.176085	0.301826	0.0515185	Plants	0.125741	True
13832	normal	normal	AMBTC	W1PNA8	W1NWT1	SELML	D8S2X3	1	1	1	1	1	1	0.572682	0.487126	0.121627	Plants	-0.0855558	True
13832	normal	normal	AMBTC	U5D8N5	W1NRU9	SELML	D8SW35	1	1	1	1	1	1	0.588977	0.657486	0.272557	Plants	0.0685086	True
13832	normal	normal	AMBTC	W1NPR6	W1P6G6	SELML	D8S222	1	1	1	1	1	1	0.45912	0.492163	0.13735	Plants	0.0330428	True
13832	normal	normal	AMBTC	W1NPR6	U5CV25	SELML	D8S222	1	1	1	1	1	1	0.45912	0.307264	0.13735	Plants	-0.151856	True
13844	normal	normal	AMBTC	U5CMQ2	U5D7T4	SELML	D8S2Z3	-1	1	1	1	-1	1	0.277193	0.162888	0.0846379	Plants	-0.114304	True
13844	normal	normal	AMBTC	W1NH33	W1NLH7	SELML	D8SNZ3	-1	1	-1	1	1	1	0.231972	0.382406	0.121368	Plants	0.150434	True
13848	normal	normal	AMBTC	W1NEC1	W1PIH5	SELML	D8RMG6	-1	1	1	1	-1	1	0.131319	0.303643	0.138493	Plants	0.172324	True
13871	normal	normal	AMBTC	U5D4F3	W1NXQ1	SELML	D8R3X1	-1	1	-1	1	1	1	0.288329	0.331045	0.0683256	Plants	0.0427164	True
13878	normal	normal	AMBTC	W1NUG7	W1PP63	SELML	D8RNN8	1	1	-1	1	-1	1	0.382926	0.647104	0.690885	Plants	0.264178	True
13878	normal	normal	AMBTC	W1NUG7	W1PTT2	SELML	D8RNN8	-1	1	-1	1	1	1	0.382926	0.425071	0.690885	Plants	0.0421447	True
13878	normal	normal	AMBTC	W1NUG7	W1PC48	SELML	D8RNN8	-1	1	-1	1	1	1	0.382926	0.734232	0.690885	Plants	0.351306	True
13890	normal	normal	AMBTC	U5CZ36	W1PLS2	SELML	D8SB35	-1	1	1	1	-1	1	0.276355	0.51635	0.0877666	Plants	0.239995	True
13902	normal	normal	AMBTC	W1Q0D2	U5DFY2	SELML	D8SWL2	-1	1	1	1	-1	1	0.357444	0.417895	0.478559	Plants	0.0604515	True
13902	normal	normal	AMBTC	W1Q0D2	W1NWD3	SELML	D8SWL2	1	1	1	1	1	1	0.357444	0.45025	0.478559	Plants	0.0928066	True
13902	normal	normal	AMBTC	W1Q0D2	U5D0W9	SELML	D8SWL2	1	1	1	1	1	1	0.357444	0.407711	0.478559	Plants	0.0502677	True
13902	normal	normal	AMBTC	W1Q0D2	W1PCM4	SELML	D8SWL2	-1	1	1	1	-1	1	0.357444	0.691024	0.478559	Plants	0.33358	True
13902	normal	normal	AMBTC	W1Q0D2	W1Q0A8	SELML	D8SWL2	1	1	1	1	1	1	0.357444	0.309878	0.478559	Plants	-0.047566	True
14000	normal	normal	AMBTC	U5D3W5	W1PP68	SELML	D8RKE9	-1	1	1	1	-1	1	0.33376	0.237724	0.0872764	Plants	-0.0960359	True
14030	normal	normal	AMBTC	W1PUJ6	W1PP57	SELML	D8QUV6	1	1	1	1	1	1	0.518278	0.587863	0.560322	Plants	0.069585	True
14155	normal	normal	AMBTC	W1P0N9	W1NJK4	SELML	D8SNW3	1	1	1	1	1	1	0.73442	0.33841	0.0842151	Plants	-0.39601	True
14167	normal	normal	AMBTC	U5CZV7	W1PSG7	SELML	D8QRJ8	-1	1	1	1	-1	1	0.422847	0.402584	0.0453471	Plants	-0.0202625	True
14167	normal	normal	AMBTC	U5CZV7	W1NL64	SELML	D8QRJ8	1	1	1	1	1	1	0.422847	0.184116	0.0453471	Plants	-0.238731	True
14209	normal	normal	AMBTC	W1NXM8	W1PZU1	SELML	D8T0B0	-1	1	-1	1	1	1	0.237727	0.437193	0.0559269	Plants	0.199466	True
14221	normal	normal	AMBTC	W1NJ49	U5DAQ5	SELML	D8SSU5	1	1	-1	1	-1	1	0.328856	0.336141	0.11451	Plants	0.0072853	True
14237	normal	normal	AMBTC	U5DG62	U5D8F0	SELML	D8SY42	-1	1	-1	1	1	1	0.631823	0.390882	0.123083	Plants	-0.240941	True
14255	normal	normal	AMBTC	W1NPH2	W1P049	SELML	D8T342	-1	1	-1	1	1	1	0.352387	0.580665	0.298945	Plants	0.228278	True
14296	normal	normal	AMBTC	W1P9Y4	W1P8I0	SELML	D8RGW8	-1	1	-1	1	1	1	0.249918	0.454448	0.126677	Plants	0.204531	True
14326	normal	normal	AMBTC	U5D282	U5DGD3	SELML	D8SMP2	-1	1	1	1	-1	1	0.643255	0.554044	0.518904	Plants	-0.0892109	True
14363	normal	normal	AMBTC	U5D1R2	W1NX76	SELML	D8S0W9	1	1	-1	1	-1	1	0.559253	0.885888	0.224778	Plants	0.326636	True
14363	normal	normal	AMBTC	U5D1R2	W1NYX5	SELML	D8S0W9	-1	1	-1	1	1	1	0.559253	0.408201	0.224778	Plants	-0.151052	True
14379	normal	normal	AMBTC	W1PXJ7	W1P2W5	SELML	D8RTA4	1	1	1	1	1	1	0.561535	0.35944	0.312534	Plants	-0.202095	True
14493	normal	normal	AMBTC	W1P021	W1PDX7	SELML	D8QRK0	-1	1	-1	1	1	1	0.376195	0.172381	0.0759073	Plants	-0.203814	True
14552	normal	normal	AMBTC	W1PJY0	U5CZL9	SELML	D8RZG0	1	1	1	1	1	1	0.779565	0.804274	0.250415	Plants	0.0247095	True
14552	normal	normal	AMBTC	W1PJY0	U5D1X2	SELML	D8RZG0	1	1	1	1	1	1	0.779565	0.342711	0.250415	Plants	-0.436854	True
14614	normal	normal	AMBTC	W1P5N3	U5DFB7	SELML	D8SL63	1	1	1	1	1	1	0.416377	0.32286	0.0894097	Plants	-0.0935171	True
14738	normal	normal	AMBTC	W1PX97	W1PP14	SELML	D8TCK4	-1	1	1	1	-1	1	0.483133	0.245006	0.0617663	Plants	-0.238127	True
14741	normal	normal	AMBTC	W1P8I8	W1PHC3	SELML	D8QRK6	-1	1	-1	1	1	1	0.265029	0.29974	0.0825195	Plants	0.0347101	True
14791	normal	normal	AMBTC	W1PGG4	U5CWS9	SELML	D8RQL3	-1	1	-1	1	1	1	0.277294	0.593801	0.0748816	Plants	0.316507	True
14795	normal	normal	AMBTC	W1PU66	W1NF52	SELML	D8T4M2	-1	1	-1	1	1	1	0.362822	0.56529	0.178001	Plants	0.202468	True
14950	normal	normal	AMBTC	U5CYK5	W1PH60	SELML	D8T7C6	-1	1					0.423517	0.560244		Plants	0.136726	True
14950	normal	normal	AMBTC	U5CYK5	W1PRK2	SELML	D8T7C6	-1	1					0.423517	0.547303		Plants	0.123786	True
14950	normal	normal	AMBTC	U5CYK5	W1PCN6	SELML	D8T7C6	1	1					0.423517	0.461612		Plants	0.0380946	True
15204	normal	normal	AMBTC	U5D1M5	W1NLK9	SELML	D8QRQ0	1	1	-1	1	-1	1	0.315579	0.390318	0.0858284	Plants	0.0747391	True
15288	normal	normal	AMBTC	U5D0Y0	W1PVD0	SELML	D8SK60	1	1	1	1	1	1	0.411269	0.389767	0.134846	Plants	-0.0215023	True
15315	normal	normal	AMBTC	W1NID7	W1PZM8	SELML	D8SBK0	1	1	-1	1	-1	1	0.323601	0.6087	0.4757	Plants	0.285099	True
15454	normal	normal	AMBTC	W1NS02	U5CXI3	SELML	D8T3K3	-1	1	-1	1	1	1	0.262774	0.209837	0.0907923	Plants	-0.0529375	True
15486	normal	normal	AMBTC	W1P0G0	W1PLE3	SELML	D8T357	-1	1	1	1	-1	1	0.788291	0.799786	0.558262	Plants	0.0114947	True
15574	normal	normal	AMBTC	W1NL95	W1PD00	SELML	D8R0H0	1	1	1	1	1	1	0.165128	0.320949	0.116774	Plants	0.15582	True
15592	normal	normal	AMBTC	W1NYE2	W1NH53	SELML	D8RYT6	1	1	1	1	1	1	0.35938	0.252323	0.128772	Plants	-0.107057	True
15615	normal	normal	AMBTC	W1PWX9	W1NTG3	SELML	D8TFJ1	1	1	1	1	1	1	0.525157	0.599819	0.163286	Plants	0.0746627	True
15615	normal	normal	AMBTC	W1PWX9	W1NU03	SELML	D8TFJ1	1	1	1	1	1	1	0.525157	0.602949	0.163286	Plants	0.0777919	True
15629	normal	normal	AMBTC	W1NZ80	W1NP88	SELML	D8T2E2	-1	1	1	1	-1	1	0.3455	0.322489	0.14648	Plants	-0.023011	True
15672	normal	normal	AMBTC	W1PZN7	W1NV13	SELML	D8TCD7	-1	1	1	1	-1	1	0.308779	0.108572	0.082577	Plants	-0.200207	True
15680	normal	normal	AMBTC	W1NY15	W1P0R3	SELML	D8QXF3	-1	1	-1	1	1	1	0.408979	0.474554	0.261754	Plants	0.0655745	True
15696	normal	normal	AMBTC	U5D3W4	U5D9D5	SELML	D8RDU1	1	1	1	1	1	1	0.449117	0.341794	0.0748102	Plants	-0.107323	True
15710	normal	normal	AMBTC	W1P7W0	W1PIY4	SELML	D8T3I3					-1	1		0.730804	0.0645671	Plants		True
15710	normal	normal	AMBTC	W1P7W0	W1PDF0	SELML	D8T3I3					1	1		0.223806	0.0645671	Plants		True
15710	normal	normal	AMBTC	W1P7W0	W1PIY0	SELML	D8T3I3					1	1		0.842498	0.0645671	Plants		True
15710	normal	normal	AMBTC	W1P7W0	W1PNU5	SELML	D8T3I3					-1	1		0.377998	0.0645671	Plants		True
15725	normal	normal	AMBTC	W1PA63	W1PHS8	SELML	D8RIL4	1	1	-1	1	-1	1	0.21032	0.283185	0.0383353	Plants	0.0728644	True
15835	normal	normal	AMBTC	W1PIE4	W1NX08	SELML	D8RTX8	1	1	-1	1	-1	1	0.326098	0.316419	0.072765	Plants	-0.00967867	True
16134	normal	normal	AMBTC	W1P742	W1P8I7	SELML	D8SDE6	1	1	-1	1	-1	1	0.354732	0.469452	0.170531	Plants	0.11472	True
16201	normal	normal	AMBTC	W1NWI0	U5D592	SELML	D8SN70	1	1	1	1	1	1	0.425228	0.625461	0.165913	Plants	0.200233	True
16223	normal	normal	AMBTC	W1PT28	W1NSL6	SELML	D8SHL1	1	1	1	1	1	1	0.505328	0.525443	0.187374	Plants	0.0201152	True
16223	normal	normal	AMBTC	U5DE19	W1NKT7	SELML	D8SSS4	-1	1	1	1	-1	1	0.414461	0.36058	0.416376	Plants	-0.053881	True
16517	normal	normal	AMBTC	W1NGY4	U5CU96	SELML	D8SMF3	1	1	1	1	1	1	0.400616	0.227581	0.125183	Plants	-0.173035	True
16517	normal	normal	AMBTC	W1NGY4	W1NPG7	SELML	D8SMF3	-1	1	1	1	-1	1	0.400616	0.137183	0.125183	Plants	-0.263433	True
17204	normal	normal	AMBTC	U5D3C6	W1PX04	SELML	D8R0D1	-1	1	-1	1	1	1	0.372383	0.483953	0.0813213	Plants	0.11157	True
17224	normal	normal	AMBTC	U5DA64	U5DDY3	SELML	D8R1F3	-1	1	1	1	-1	1	0.317977	0.337401	0.113712	Plants	0.0194248	True
17224	normal	normal	AMBTC	U5DA64	U5D218	SELML	D8R1F3	1	1	1	1	1	1	0.317977	0.459393	0.113712	Plants	0.141416	True
18860	normal	normal	AMBTC	U5CX75	W1P5M0	SELML	D8R448	-1	1	1	1	-1	1	0.131948	0.250123	0.0842587	Plants	0.118175	True
18896	normal	normal	AMBTC	W1P7V6	W1PII8	SELML	D8TAE8	1	1	1	1	1	1	0.285922	0.834233	0.0853395	Plants	0.548311	True
18896	normal	normal	AMBTC	W1NKC5	U5D1C5	SELML	D8SYL9	1	1	1	1	1	1	0.341043	0.174893	0.183778	Plants	-0.16615	True
18896	normal	normal	AMBTC	W1NKC5	U5DET4	SELML	D8SYL9	1	1	1	1	1	1	0.341043	0.411439	0.183778	Plants	0.0703955	True
18934	normal	normal	AMBTC	W1PDK0	W1NDI4	SELML	D8SPU1	-1	1	1	1	-1	1	0.216048	0.509933	0.124748	Plants	0.293885	True
18966	normal	normal	AMBTC	U5D3Z6	W1PHR0	SELML	D8RU20			-1	1			0.481471		0.168743	Plants		True
18966	normal	normal	AMBTC	U5D3Z6	W1Q0E4	SELML	D8RU20	-1	1	-1	1	1	1	0.481471	0.552214	0.168743	Plants	0.0707436	True
18966	normal	normal	AMBTC	U5D3Z6	U5DAL3	SELML	D8RU20	-1	1	-1	1	1	1	0.481471	0.529111	0.168743	Plants	0.04764	True
19241	normal	normal	AMBTC	W1NMF1	U5D0Y6	SELML	D8T613	-1	1	-1	1	1	1	0.366084	0.643101	0.24998	Plants	0.277018	True
19241	normal	normal	AMBTC	W1NMF1	U5CY98	SELML	D8T613	-1	1	-1	1	1	1	0.366084	0.430136	0.24998	Plants	0.0640524	True
19241	normal	normal	AMBTC	W1NMF1	W1NPQ9	SELML	D8T613	-1	1	-1	1	1	1	0.366084	0.631326	0.24998	Plants	0.265243	True
19241	normal	normal	AMBTC	W1NMF1	W1PPR0	SELML	D8T613	1	1	-1	1	-1	1	0.366084	0.527361	0.24998	Plants	0.161277	True
19282	normal	normal	AMBTC	W1NJ23	W1PNK4	SELML	D8SLK3	-1	1	-1	1	1	1	0.207467	0.260171	0.0723492	Plants	0.0527037	True
19282	normal	normal	AMBTC	W1NJ23	U5D2Z5	SELML	D8SLK3	-1	1	-1	1	1	1	0.207467	0.204408	0.0723492	Plants	-0.00305875	True
19308	normal	normal	AMBTC	W1P5P2	W1P0E3	SELML	D8S225	1	1	1	1	1	1	0.324326	0.242354	0.102343	Plants	-0.0819721	True
19321	normal	normal	AMBTC	W1P218	W1PPF3	SELML	D8RWP3	1	1	1	1	1	1	0.480525	0.636895	0.433633	Plants	0.15637	True
19321	normal	normal	AMBTC	W1P218	W1PT57	SELML	D8RWP3	-1	1	1	1	-1	1	0.480525	0.46413	0.433633	Plants	-0.0163949	True
19321	normal	normal	AMBTC	W1P218	W1NWL5	SELML	D8RWP3	1	1	1	1	1	1	0.480525	0.497928	0.433633	Plants	0.0174026	True
19321	normal	normal	AMBTC	W1P218	W1PY75	SELML	D8RWP3	1	1	1	1	1	1	0.480525	0.767457	0.433633	Plants	0.286932	True
19359	normal	normal	AMBTC	W1PLY1	W1PL46	SELML	D8SRW7	1	1	1	1	1	1	0.225353	0.248102	0.0605167	Plants	0.0227496	True
19375	normal	normal	AMBTC	W1NIA7	W1NZ92	SELML	D8RF84	1	1	1	1	1	1	0.140468	0.292011	0.123726	Plants	0.151543	True
19432	normal	normal	AMBTC	U5CM42	W1PRG5	SELML	D8QRT6	1	1	1	1	1	1	0.490664	0.687804	0.445032	Plants	0.197141	True
19443	normal	normal	AMBTC	U5D4A0	W1PB02	SELML	D8SXJ2	-1	1	1	1	-1	1	0.289587	0.510129	0.059456	Plants	0.220542	True
19443	normal	normal	AMBTC	U5D4A0	W1NQ25	SELML	D8SXJ2	-1	1	1	1	-1	1	0.289587	0.591413	0.059456	Plants	0.301827	True
19876	normal	normal	AMBTC	W1NLI2	W1PCJ0	SELML	D8SFK2	1	1	1	1	1	1	0.243523	0.435927	0.0386475	Plants	0.192405	True
19918	normal	normal	AMBTC	U5D4Q3	W1PJL7	SELML	D8T1H3	-1	1	1	1	-1	1	0.260444	0.643502	0.0622132	Plants	0.383058	True
19919	normal	normal	AMBTC	W1PEL2	W1PZN0	SELML	D8RDQ3	-1	1	1	1	-1	1	0.345448	0.464832	0.0684288	Plants	0.119384	True
19957	normal	normal	AMBTC	W1NQA9	W1PPW1	SELML	D8T3Y6	1	1	1	1	1	1	0.334681	0.389241	0.0304274	Plants	0.0545593	True
19957	normal	normal	AMBTC	W1PZ02	W1NWC7	SELML	D8T822	1	1	1	1	1	1	0.370741	0.708286	0.654735	Plants	0.337545	True
19957	normal	normal	AMBTC	W1PZ02	W1NZY4	SELML	D8T822	-1	1	1	1	-1	1	0.370741	0.756685	0.654735	Plants	0.385945	True
19957	normal	normal	AMBTC	U5DBI9	W1PFD2	SELML	D8SNX3	1	1	1	1	1	1	0.183379	0.323384	0.100258	Plants	0.140006	True
19961	normal	normal	AMBTC	W1PFQ4	U5DD49	SELML	D8S323	-1	1	1	1	-1	1	0.606216	0.332815	0.0900892	Plants	-0.273401	True
19965	normal	normal	AMBTC	W1PI99	W1NG52	SELML	D8R7W2	-1	1	-1	1	1	1	0.34615	0.276646	0.0589459	Plants	-0.0695036	True
20852	normal	normal	AMBTC	W1PCQ1	W1PX38	SELML	D8R0E7	-1	1	-1	1	1	1	0.35966	0.486377	0.185172	Plants	0.126717	True
20852	normal	normal	AMBTC	W1PCQ1	W1NJA2	SELML	D8R0E7	1	1	-1	1	-1	1	0.35966	0.69832	0.185172	Plants	0.338659	True
20855	normal	normal	AMBTC	U5D8R5	U5CWK0	SELML	D8QNS3	-1	1	1	1	-1	1	0.411325	0.588356	0.272602	Plants	0.177031	True
20855	normal	normal	AMBTC	U5D8R5	W1PHC7	SELML	D8QNS3	1	1	1	1	1	1	0.411325	0.402555	0.272602	Plants	-0.00876923	True
20863	normal	normal	AMBTC	W1NT38	W1PYL7	SELML	D8RZE7	1	1	1	1	1	1	0.239773	0.279231	0.111385	Plants	0.0394584	True
20863	normal	normal	AMBTC	W1NT38	W1PBV2	SELML	D8RZE7	1	1	1	1	1	1	0.239773	0.29267	0.111385	Plants	0.0528975	True
20884	normal	normal	AMBTC	W1PCP7	W1PIY8	SELML	D8RPY2	1	1	1	1	1	1	0.251007	0.254205	0.370014	Plants	0.00319748	True
20921	normal	normal	AMBTC	W1P136	U5D4V6	SELML	D8R4B4	1	1	-1	1	-1	1	0.300933	0.324886	0.144448	Plants	0.0239525	True
20953	normal	normal	AMBTC	W1PZU5	W1P028	SELML	D8RG55	1	1	1	1	1	1	0.554909	0.431868	0.357558	Plants	-0.123041	True
21022	normal	normal	AMBTC	U5CVN8	W1PCZ5	SELML	D8R0E4	-1	1	1	1	-1	1	0.505902	0.204685	0.0542521	Plants	-0.301217	True
21049	normal	normal	AMBTC	U5D4I6	W1PKU2	SELML	D8S9N9	1	1	1	1	1	1	0.291333	0.298646	0.0764248	Plants	0.00731269	True
21087	normal	normal	AMBTC	W1NFV3	W1PF38	SELML	D8RHD3	-1	1	-1	1	1	1	0.406139	0.470203	0.13341	Plants	0.0640635	True
21094	normal	normal	AMBTC	W1NGX4	W1NNW8	SELML	D8RQ98	1	1	1	1	1	1	0.257746	0.494026	0.112929	Plants	0.23628	True
21136	normal	normal	AMBTC	U5D9G5	U5D2X7	SELML	D8R7R7	1	1	1	1	1	1	0.191119	0.247768	0.0617877	Plants	0.0566487	True
21136	normal	normal	AMBTC	U5D9G5	U5CUN8	SELML	D8R7R7	1	1	1	1	1	1	0.191119	0.545293	0.0617877	Plants	0.354174	True
21136	normal	normal	AMBTC	W1PXR4	U5CXE3	SELML	D8RCT6	-1	1	-1	1	1	1	0.264155	0.222407	0.0406294	Plants	-0.0417478	True
21145	normal	normal	AMBTC	U5D896	W1PFX5	SELML	D8R1Y1	-1	1	-1	1	1	1	0.280381	0.488616	0.164948	Plants	0.208235	True
21229	normal	normal	AMBTC	W1NIH0	W1NR75	SELML	D8SP97	1	1	1	1	1	1	0.146136	0.404315	0.207932	Plants	0.258179	True
21229	normal	normal	AMBTC	W1P0Q2	U5D085	SELML	D8RNL8	-1	1	1	1	-1	1	0.260241	0.74381	0.0683467	Plants	0.483568	True
21229	normal	normal	AMBTC	W1P0Q2	W1PKK1	SELML	D8RNL8	1	1	1	1	1	1	0.260241	0.264995	0.0683467	Plants	0.00475361	True
21230	normal	normal	AMBTC	W1P4V6	W1P5X4	SELML	D8T3M4	1	1	1	1	1	1	0.176011	0.379473	0.0541404	Plants	0.203462	True
21237	normal	normal	AMBTC	W1PKQ1	W1NNE9	SELML	D8SI85	1	1	1	1	1	1	0.242805	0.479192	0.117496	Plants	0.236387	True
21319	normal	normal	AMBTC	U5D652	W1P810	SELML	D8QUF0	-1	1	1	1	-1	1	0.413503	0.323696	0.0840106	Plants	-0.0898071	True
21319	normal	normal	AMBTC	U5D652	W1NXW7	SELML	D8QUF0	1	1	1	1	1	1	0.413503	0.240676	0.0840106	Plants	-0.172827	True
21349	normal	normal	AMBTC	U5DDA4	U5D9Q3	SELML	D8REE6	-1	1	1	1	-1	1	0.271959	0.339646	0.197449	Plants	0.0676868	True
21450	normal	normal	AMBTC	U5D9Y4	W1NU05	SELML	D8T1Z3	-1	1	-1	1	1	1	0.652608	0.509344	0.692675	Plants	-0.143264	True
21450	normal	normal	AMBTC	U5D9Y4	W1NVA3	SELML	D8T1Z3	1	1	-1	1	-1	1	0.652608	0.710797	0.692675	Plants	0.0581895	True
21450	normal	normal	AMBTC	U5D9Y4	W1NGF2	SELML	D8T1Z3	-1	1	-1	1	1	1	0.652608	0.303754	0.692675	Plants	-0.348854	True
21450	normal	normal	AMBTC	U5D9Y4	W1NX56	SELML	D8T1Z3	1	1	-1	1	-1	1	0.652608	0.37702	0.692675	Plants	-0.275588	True
21461	normal	normal	AMBTC	W1Q0R3	U5D7A5	SELML	D8R554	1	1					0.733116	0.325815		Plants	-0.407301	True
21481	normal	normal	AMBTC	U5D418	W1PIJ9	SELML	D8R072	-1	1	-1	1	1	1	0.500961	0.300377	0.0769751	Plants	-0.200584	True
21495	normal	normal	AMBTC	W1PZ44	U5D5C1	SELML	D8QQR5	-1	1	1	1	-1	1	0.986708	0.451196	0.15896	Plants	-0.535512	True
21562	normal	normal	AMBTC	W1PJB1	W1P535	SELML	D8S7I0	1	1	-1	1	-1	1	0.396611	0.606474	0.439705	Plants	0.209863	True
21600	normal	normal	AMBTC	W1PFR8	W1PAY1	SELML	D8SN49	-1	1	-1	1	1	1	0.549474	0.395505	0.10539	Plants	-0.153969	True
21646	normal	normal	AMBTC	W1NDK1	W1PV19	SELML	D8RAC9	-1	1	-1	1	1	1	0.407457	0.403494	0.0711368	Plants	-0.00396309	True
21649	normal	normal	AMBTC	W1PQ43	W1NW18	SELML	D8SSC7	1	1	1	1	1	1	0.572456	0.686509	0.268253	Plants	0.114053	True
21654	normal	normal	AMBTC	W1PGN0	W1NMD2	SELML	D8RM02	-1	1	-1	1	1	1	0.600101	0.340182	0.233257	Plants	-0.259919	True
21654	normal	normal	AMBTC	W1PGN0	W1P1V2	SELML	D8RM02	-1	1	-1	1	1	1	0.600101	0.448535	0.233257	Plants	-0.151566	True
21654	normal	normal	AMBTC	W1PGN0	W1PZY4	SELML	D8RM02	1	1	-1	1	-1	1	0.600101	0.911366	0.233257	Plants	0.311265	True
21660	normal	normal	AMBTC	W1NSH4	W1PZ50	SELML	D8R538	1	1	1	1	1	1	0.460117	0.238582	0.2401	Plants	-0.221535	True
21726	normal	normal	AMBTC	W1P8T1	U5D8R8	SELML	D8S240	-1	1	-1	1	1	1	0.591751	0.557054	0.229761	Plants	-0.0346968	True
22298	normal	normal	AMBTC	W1PTV9	W1PBR2	SELML	D8TC94			-1	1			0.702819		0.325144	Plants		True
22298	normal	normal	AMBTC	W1PWF4	W1PN08	SELML	D8RRD2	1	1	1	1	1	1	0.523242	0.894708	0.294254	Plants	0.371466	True
22298	normal	normal	AMBTC	W1PWF4	W1NXV0	SELML	D8RRD2	1	1	1	1	1	1	0.523242	0.755012	0.294254	Plants	0.231771	True
22298	normal	normal	AMBTC	U5DBI1	U5DDA8	SELML	D8QPV4	1	1	-1	1	-1	1	0.384466	0.468302	0.253612	Plants	0.0838358	True
22298	normal	normal	AMBTC	U5DBI1	U5DHG6	SELML	D8QPV4	1	1	-1	1	-1	1	0.384466	0.741725	0.253612	Plants	0.357259	True
22298	normal	normal	AMBTC	W1NRV2	W1PT14	SELML	D8S1X9	-1	1	1	1	-1	1	0.974716	0.770506	0.875913	Plants	-0.20421	True
22298	normal	normal	AMBTC	W1NRV2	W1NEF7	SELML	D8S1X9	1	1	1	1	1	1	0.974716	0.695216	0.875913	Plants	-0.2795	True
22298	normal	normal	AMBTC	W1NRV2	W1NWQ4	SELML	D8S1X9	1	1	1	1	1	1	0.974716	0.74056	0.875913	Plants	-0.234156	True
22298	normal	normal	AMBTC	W1NRV2	W1P5J7	SELML	D8S1X9	1	1	1	1	1	1	0.974716	0.567467	0.875913	Plants	-0.407249	True
22594	normal	normal	AMBTC	W1NFW1	W1PP82	SELML	D8RG18	-1	1	-1	1	1	1	0.282938	0.602487	0.0467622	Plants	0.319548	True
22595	normal	normal	AMBTC	U5D412	U5DDN8	SELML	D8SYT1	-1	1	-1	1	1	1	0.865782	0.463786	0.799536	Plants	-0.401997	True
22595	normal	normal	AMBTC	W1NLJ5	W1P395	SELML	D8SUW7	-1	1	-1	1	1	1	0.553307	0.685683	0.300879	Plants	0.132376	True
22600	normal	normal	AMBTC	U5DFH7	U5DFF4	SELML	D8SEX9	-1	1	1	1	-1	1	0.471389	0.421066	0.0808791	Plants	-0.050323	True
22601	normal	normal	AMBTC	W1PZ78	U5D664	SELML	D8RL69	-1	1	-1	1	1	1	0.455114	0.378673	0.192602	Plants	-0.0764411	True
22601	normal	normal	AMBTC	W1PZ78	U5DAH2	SELML	D8RL69	-1	1	-1	1	1	1	0.455114	0.555734	0.192602	Plants	0.10062	True
22753	normal	normal	AMBTC	U5D377	W1PE52	SELML	D8RYA3	1	1	1	1	1	1	0.519057	0.627732	0.192658	Plants	0.108675	True
22762	normal	normal	AMBTC	W1NX46	W1P8D8	SELML	D8SY09	1	1	1	1	1	1	0.4738	0.6632	0.130548	Plants	0.1894	True
22765	normal	normal	AMBTC	W1P8N3	W1NJT1	SELML	D8SY68	1	1	-1	1	-1	1	0.28758	0.58977	0.0477431	Plants	0.302189	True
22792	normal	normal	AMBTC	U5DFH0	W1PPY0	SELML	D8QWC1	1	1	1	1	1	1	0.394799	0.68998	0.0841215	Plants	0.295181	True
22792	normal	normal	AMBTC	U5DFH0	W1PIR5	SELML	D8QWC1	-1	1	1	1	-1	1	0.394799	0.227805	0.0841215	Plants	-0.166995	True
22814	normal	normal	AMBTC	W1NFL6	W1PAQ8	SELML	D8SQL6	1	1	-1	1	-1	1	0.413845	0.651848	0.350439	Plants	0.238003	True
22814	normal	normal	AMBTC	W1NFL6	W1PLT1	SELML	D8SQL6	1	1	-1	1	-1	1	0.413845	0.649867	0.350439	Plants	0.236021	True
22814	normal	normal	AMBTC	W1NFL6	W1PH39	SELML	D8SQL6	1	1	-1	1	-1	1	0.413845	0.764279	0.350439	Plants	0.350433	True
22814	normal	normal	AMBTC	W1NFL6	W1PDU4	SELML	D8SQL6	-1	1	-1	1	1	1	0.413845	0.859397	0.350439	Plants	0.445552	True
22814	normal	normal	AMBTC	W1NFL6	W1P899	SELML	D8SQL6	1	1	-1	1	-1	1	0.413845	0.727503	0.350439	Plants	0.313658	True
22814	normal	normal	AMBTC	W1NFL6	W1PZN9	SELML	D8SQL6	1	1	-1	1	-1	1	0.413845	0.949726	0.350439	Plants	0.535881	True
22835	normal	normal	AMBTC	W1NKF0	W1PZT0	SELML	D8SZX8	1	1	-1	1	-1	1	0.538323	0.76597	0.782305	Plants	0.227647	True
22835	normal	normal	AMBTC	W1PW92	W1P6R2	SELML	D8RM28	1	1					0.676901	0.393227		Plants	-0.283674	True
22835	normal	normal	AMBTC	W1PUZ9	W1P558	SELML	D8RYH2	-1	1	-1	1	1	1	0.724563	0.373936	0.768791	Plants	-0.350627	True
22835	normal	normal	AMBTC	W1PUZ9	W1Q0X8	SELML	D8RYH2	1	1	-1	1	-1	1	0.724563	0.94372	0.768791	Plants	0.219157	True
22838	normal	normal	AMBTC	W1PKN2	U5D678	SELML	D8SHE6	-1	1	-1	1	1	1	0.275604	0.319007	0.054677	Plants	0.043403	True
22847	normal	normal	AMBTC	W1NZR8	W1NZR5	SELML	D8RBM7	1	1	-1	1	-1	1	0.284602	0.298663	0.0574658	Plants	0.0140617	True
22849	normal	normal	AMBTC	W1PNG6	W1PFP8	SELML	D8RSL5	-1	1	1	1	-1	1	0.416835	0.594183	0.243039	Plants	0.177348	True
22849	normal	normal	AMBTC	W1NEM8	W1PML5	SELML	D8T718	1	1	1	1	1	1	0.610234	0.70075	0.249651	Plants	0.0905159	True
22849	normal	normal	AMBTC	W1NEM8	U5D0X3	SELML	D8T718	1	1	1	1	1	1	0.610234	0.458309	0.249651	Plants	-0.151926	True
22849	normal	normal	AMBTC	W1NEM8	U5DFU2	SELML	D8T718	-1	1	1	1	-1	1	0.610234	0.687043	0.249651	Plants	0.0768089	True
22849	normal	normal	AMBTC	W1NEM8	U5D1J3	SELML	D8T718	1	1	1	1	1	1	0.610234	0.800252	0.249651	Plants	0.190018	True
22870	normal	normal	AMBTC	U5D1X0	U5D9N0	SELML	D8S9K8	1	1	-1	1	-1	1	0.47728	0.592753	0.0968577	Plants	0.115474	True
22870	normal	normal	AMBTC	U5D1X0	U5D1G7	SELML	D8S9K8	-1	1	-1	1	1	1	0.47728	0.515007	0.0968577	Plants	0.0377276	True
22870	normal	normal	AMBTC	U5D1X0	U5D4V2	SELML	D8S9K8	1	1	-1	1	-1	1	0.47728	0.710698	0.0968577	Plants	0.233419	True
22881	normal	normal	AMBTC	U5D4K2	W1P356	SELML	D8SZB6	-1	1	1	1	-1	1	0.426488	0.801507	0.110749	Plants	0.375018	True
22881	normal	normal	AMBTC	U5D4K2	U5CV61	SELML	D8SZB6	1	1	1	1	1	1	0.426488	0.325003	0.110749	Plants	-0.101486	True
22883	normal	normal	AMBTC	W1P9D1	W1NWM3	SELML	D8QS26	1	1	-1	1	-1	1	0.561076	0.728811	0.153686	Plants	0.167735	True
22883	normal	normal	AMBTC	W1PYE9	W1NSC4	SELML	D8T0I8	1	1	1	1	1	1	0.2531	0.298142	0.0495481	Plants	0.0450422	True
22883	normal	normal	AMBTC	W1PEX4	W1PF63	SELML	D8SQ93	1	1	1	1	1	1	0.385179	0.408398	0.0614348	Plants	0.0232183	True
22883	normal	normal	AMBTC	W1PEX4	W1NU73	SELML	D8SQ93	1	1	1	1	1	1	0.385179	0.522724	0.0614348	Plants	0.137544	True
22883	normal	normal	AMBTC	W1PEX4	W1PNH4	SELML	D8SQ93	1	1	1	1	1	1	0.385179	0.320492	0.0614348	Plants	-0.0646877	True
22891	normal	normal	AMBTC	U5D4D1	W1NN88	SELML	D8SJH0	1	1	-1	1	-1	1	0.393821	0.645422	0.186007	Plants	0.251601	True
22891	normal	normal	AMBTC	U5D4D1	W1PFL0	SELML	D8SJH0	1	1	-1	1	-1	1	0.393821	0.686669	0.186007	Plants	0.292848	True
22891	normal	normal	AMBTC	U5D4D1	U5CXE5	SELML	D8SJH0	1	1	-1	1	-1	1	0.393821	0.681458	0.186007	Plants	0.287637	True
22930	normal	normal	AMBTC	W1PR35	U5CVY4	SELML	D8REB3	1	1					0.534981	0.279397		Plants	-0.255584	True
22930	normal	normal	AMBTC	W1PR35	W1P1T4	SELML	D8REB3	-1	1					0.534981	0.235927		Plants	-0.299054	True
22932	normal	normal	AMBTC	W1NDY3	W1NX93	SELML	D8SZR6	1	1	-1	1	-1	1	0.366214	0.301842	0.371445	Plants	-0.0643718	True
22936	normal	normal	AMBTC	U5DFY4	U5DJ94	SELML	D8RK46	1	1	1	1	1	1	0.317947	0.586809	0.119495	Plants	0.268862	True
22937	normal	normal	AMBTC	W1PVF5	W1PIC3	SELML	D8T746	1	1	-1	1	-1	1	0.282985	0.249474	0.0490912	Plants	-0.0335115	True
22950	normal	normal	AMBTC	U5DDQ5	W1PCC9	SELML	D8R1D1	-1	1	-1	1	1	1	0.657828	0.433319	0.148	Plants	-0.224509	True
22951	normal	normal	AMBTC	W1PSA9	U5D2M7	SELML	D8QP51	1	1	1	1	1	1	0.22779	0.736649	0.0509711	Plants	0.508859	True
22951	normal	normal	AMBTC	W1PSA9	W1PTM0	SELML	D8QP51	1	1	1	1	1	1	0.22779	0.720584	0.0509711	Plants	0.492794	True
22951	normal	normal	AMBTC	W1NZH0	W1PB16	SELML	D8R670	1	1	1	1	1	1	0.285187	0.218762	0.0371369	Plants	-0.0664252	True
22951	normal	normal	AMBTC	W1NZH0	W1PYA2	SELML	D8R670	1	1	1	1	1	1	0.285187	0.332589	0.0371369	Plants	0.0474015	True
22952	normal	normal	AMBTC	W1NUD8	W1NE71	SELML	D8R121	-1	1	-1	1	1	1	0.603063	0.38332	0.155508	Plants	-0.219742	True
22952	normal	normal	AMBTC	W1NUD8	W1PY53	SELML	D8R121	1	1	-1	1	-1	1	0.603063	0.345823	0.155508	Plants	-0.25724	True
22953	normal	normal	AMBTC	W1P2U4	W1P0V8	SELML	D8RM59	-1	1	1	1	-1	1	0.869444	0.588133	0.239716	Plants	-0.281312	True
22953	normal	normal	AMBTC	W1PSR3	W1PXS5	SELML	D8S4S9	-1	1	1	1	-1	1	0.537443	0.598702	0.109348	Plants	0.0612595	True
22966	normal	normal	AMBTC	W1Q0E6	W1PFL4	SELML	D8QXS4	1	1	1	1	1	1	0.343148	0.428469	0.0624044	Plants	0.0853212	True
22966	normal	normal	AMBTC	W1Q0E6	W1P7B7	SELML	D8QXS4	1	1	1	1	1	1	0.343148	0.146213	0.0624044	Plants	-0.196935	True
22996	normal	normal	AMBTC	W1PQP5	U5D0L4	SELML	D8SEW0	1	1	1	1	1	1	0.245073	0.180917	0.0911657	Plants	-0.0641555	True
22999	normal	normal	AMBTC	U5D5I4	W1NTP2	SELML	D8TCR1	1	1	1	1	1	1	0.330493	0.430656	0.180905	Plants	0.100163	True
23003	normal	normal	AMBTC	W1NU17	W1NIT1	SELML	D8QNN8	1	1	1	1	1	1	0.533851	0.649101	0.0895473	Plants	0.11525	True
23012	normal	normal	AMBTC	W1NGY8	U5DIE8	SELML	D8SCH1	1	1	1	1	1	1	0.18257	0.545523	0.15161	Plants	0.362952	True
23012	normal	normal	AMBTC	W1NGY8	W1NXS1	SELML	D8SCH1	1	1	1	1	1	1	0.18257	0.444024	0.15161	Plants	0.261453	True
23023	normal	normal	AMBTC	W1NL25	W1PD10	SELML	D8QZ00	-1	1	1	1	-1	1	0.737581	0.850194	0.132591	Plants	0.112613	True
23023	normal	normal	AMBTC	W1PC92	W1PSS4	SELML	D8RX27	-1	1	1	1	-1	1	0.305666	0.673844	0.115915	Plants	0.368178	True
23024	normal	normal	AMBTC	W1NVV1	W1NL45	SELML	D8SQP5	-1	1	-1	1	1	1	0.275421	0.593631	0.240089	Plants	0.31821	True
23032	normal	normal	AMBTC	W1PRB7	W1P8N2	SELML	D8QZV8	-1	1	1	1	-1	1	0.504096	0.455371	0.257462	Plants	-0.048725	True
23050	normal	normal	AMBTC	W1PSL2	U5DCY9	SELML	D8R325	1	1	1	1	1	1	0.1599	0.22908	0.311735	Plants	0.0691806	True
23050	normal	normal	AMBTC	W1PSL2	W1P1N0	SELML	D8R325	-1	1	1	1	-1	1	0.1599	0.702526	0.311735	Plants	0.542626	True
23050	normal	normal	AMBTC	W1PSL2	U5CQU6	SELML	D8R325	1	1	1	1	1	1	0.1599	0.142855	0.311735	Plants	-0.017045	True
23054	normal	normal	AMBTC	W1NZP4	U5CWC9	SELML	D8SNW2	-1	1	1	1	-1	1	0.609004	0.641691	0.283411	Plants	0.0326873	True
23054	normal	normal	AMBTC	W1NZP4	W1PN20	SELML	D8SNW2	-1	1	1	1	-1	1	0.609004	0.697161	0.283411	Plants	0.0881574	True
23056	normal	normal	AMBTC	W1P0J0	U5D2A4	SELML	C4P7X6	1	1	1	1	1	1	0.384166	0.22349	0.123581	Plants	-0.160676	True
23068	normal	normal	AMBTC	W1P465	W1P8F8	SELML	D8S568	1	1	1	1	1	1	0.496938	0.377039	0.546753	Plants	-0.1199	True
23070	normal	normal	AMBTC	W1PGS7	W1PSU9	SELML	D8SA50	-1	1	-1	1	1	1	0.813268	0.4089	0.112072	Plants	-0.404368	True
23070	normal	normal	AMBTC	W1PGS7	W1PJX5	SELML	D8SA50	1	1	-1	1	-1	1	0.813268	0.739595	0.112072	Plants	-0.0736725	True
23070	normal	normal	AMBTC	W1PGS7	W1PIF0	SELML	D8SA50	1	1	-1	1	-1	1	0.813268	0.522502	0.112072	Plants	-0.290766	True
23070	normal	normal	AMBTC	W1PGS7	W1PJL9	SELML	D8SA50	-1	1	-1	1	1	1	0.813268	0.422772	0.112072	Plants	-0.390495	True
23070	normal	normal	AMBTC	W1PGS7	W1PT12	SELML	D8SA50	-1	1	-1	1	1	1	0.813268	0.724384	0.112072	Plants	-0.0888839	True
23077	normal	normal	AMBTC	W1PYU1	W1NRE0	SELML	D8RDJ0	1	1	-1	1	-1	1	0.509663	0.239382	0.0681963	Plants	-0.270281	True
23079	normal	normal	AMBTC	W1PVQ6	W1NRA4	SELML	D8RV28	1	1	1	1	1	1	0.457757	0.450589	0.369151	Plants	-0.00716783	True
23086	normal	normal	AMBTC	W1NNP9	W1PMT8	SELML	D8QYN7	1	1	-1	1	-1	1	0.390366	0.692074	0.171527	Plants	0.301708	True
23086	normal	normal	AMBTC	W1NNP9	W1P053	SELML	D8QYN7	1	1	-1	1	-1	1	0.390366	0.389131	0.171527	Plants	-0.00123488	True
23086	normal	normal	AMBTC	W1NNP9	W1NRF6	SELML	D8QYN7	-1	1	-1	1	1	1	0.390366	0.357479	0.171527	Plants	-0.0328865	True
23088	normal	normal	AMBTC	W1PU47	W1PU51	SELML	D8RFQ7	1	1	-1	1	-1	1	0.272089	0.484151	0.179138	Plants	0.212062	True
23101	normal	normal	AMBTC	W1PJV0	W1NWQ7	SELML	D8T1L6	-1	1	1	1	-1	1	0.401377	0.434867	0.0941818	Plants	0.0334903	True
23105	normal	normal	AMBTC	W1PP17	W1PRY3	SELML	D8SZ02	1	1	1	1	1	1	0.253753	0.341689	0.119584	Plants	0.0879358	True
23130	normal	normal	AMBTC	W1PWR9	U5D730	SELML	D8QQ55	1	1	1	1	1	1	0.366392	0.783482	0.138081	Plants	0.417091	True
23130	normal	normal	AMBTC	W1PWR9	W1NFN8	SELML	D8QQ55	1	1	1	1	1	1	0.366392	0.811108	0.138081	Plants	0.444716	True
23130	normal	normal	AMBTC	W1PWR9	U5D7R2	SELML	D8QQ55	1	1	1	1	1	1	0.366392	0.449771	0.138081	Plants	0.0833795	True
23137	normal	normal	AMBTC	W1NVZ1	W1PVT1	SELML	D8S8K8	1	1	1	1	1	1	0.365114	0.214581	0.103041	Plants	-0.150533	True
23147	normal	normal	AMBTC	U5D163	W1PYF9	SELML	D8ST57	1	1	-1	1	-1	1	0.352701	0.312983	0.122803	Plants	-0.0397188	True
23147	normal	normal	AMBTC	U5D8B9	U5DD41	SELML	D8QXM7	1	1	1	1	1	1	0.368922	0.240245	0.0434617	Plants	-0.128676	True
23147	normal	normal	AMBTC	W1PQ87	W1NT36	SELML	D8S859	1	1	-1	1	-1	1	0.321197	0.316652	0.0687777	Plants	-0.00454518	True
23151	normal	normal	AMBTC	W1PZ58	W1P030	SELML	D8QPY3	1	1	1	1	1	1	0.388592	0.455489	0.123184	Plants	0.066897	True
23172	normal	normal	AMBTC	W1NLX2	W1NHL9	SELML	D8TAH1	1	1	1	1	1	1	0.250665	0.537328	0.0405742	Plants	0.286663	True
23177	normal	normal	AMBTC	U5D3M1	W1PY74	SELML	D8RZ76	1	1	-1	1	-1	1	0.687119	0.345916	0.0485233	Plants	-0.341203	True
23177	normal	normal	AMBTC	U5D3M1	W1PL31	SELML	D8RZ76	-1	1	-1	1	1	1	0.687119	0.303555	0.0485233	Plants	-0.383564	True
23180	normal	normal	AMBTC	W1PGK6	W1PNW5	SELML	D8T5D0	1	1	1	1	1	1	0.36583	0.403516	0.0416101	Plants	0.037686	True
23201	normal	normal	AMBTC	W1NF85	W1NKV9	SELML	D8S2X5	1	1	1	1	1	1	0.535202	0.515001	0.175054	Plants	-0.0202011	True
23201	normal	normal	AMBTC	W1NF85	W1PBK4	SELML	D8S2X5	1	1	1	1	1	1	0.535202	0.627317	0.175054	Plants	0.092115	True
23201	normal	normal	AMBTC	W1PKF9	W1P433	SELML	D8T109	1	1	1	1	1	1	0.687424	0.956353	0.219176	Plants	0.26893	True
23201	normal	normal	AMBTC	W1PKF9	W1PZM7	SELML	D8T109	1	1	1	1	1	1	0.687424	0.681307	0.219176	Plants	-0.00611633	True
23213	normal	normal	AMBTC	U5DFP5	U5D7E0	SELML	D8SVK6	1	1	-1	1	-1	1	0.575811	0.576882	0.020405	Plants	0.00107118	True
23213	normal	normal	AMBTC	U5DFP5	W1NNT0	SELML	D8SVK6	1	1	-1	1	-1	1	0.575811	0.298944	0.020405	Plants	-0.276867	True
23213	normal	normal	AMBTC	U5DFP5	W1P018	SELML	D8SVK6	-1	1	-1	1	1	1	0.575811	0.833013	0.020405	Plants	0.257202	True
23213	normal	normal	AMBTC	U5DFP5	W1PUD4	SELML	D8SVK6	1	1	-1	1	-1	1	0.575811	0.477438	0.020405	Plants	-0.0983728	True
23236	normal	normal	AMBTC	W1NJ38	W1NZG2	SELML	D8T020	1	1	1	1	1	1	0.292766	0.384387	0.154363	Plants	0.0916213	True
23257	normal	normal	AMBTC	W1P2N3	W1Q0B3	SELML	D8T2B4	1	1	1	1	1	1	0.426434	0.474149	0.0476932	Plants	0.0477145	True
23257	normal	normal	AMBTC	W1NDG6	U5DH60	SELML	D8T1I5	1	1	-1	1	-1	1	0.248114	0.371293	0.039818	Plants	0.123179	True
23257	normal	normal	AMBTC	W1NEG5	W1PH33	SELML	D8R9N6	1	1	1	1	1	1	0.326851	0.242305	0.113331	Plants	-0.0845461	True
23257	normal	normal	AMBTC	W1NEG5	W1PT08	SELML	D8R9N6	1	1	1	1	1	1	0.326851	0.490444	0.113331	Plants	0.163592	True
23291	normal	normal	AMBTC	W1P0N1	W1P1K7	SELML	D8RV78	-1	1	1	1	-1	1	0.251569	0.47129	0.0414132	Plants	0.219722	True
23315	normal	normal	AMBTC	U5DAG3	W1PBD9	SELML	D8QYL7	1	1	1	1	1	1	0.348418	0.569671	0.169644	Plants	0.221254	True
23315	normal	normal	AMBTC	W1PMP7	W1P688	SELML	D8S2H5	1	1	1	1	1	1	0.986778	0.363827	0.211025	Plants	-0.622951	True
23315	normal	normal	AMBTC	W1PMP7	U5D4E5	SELML	D8S2H5	1	1	1	1	1	1	0.986778	0.351703	0.211025	Plants	-0.635075	True
23315	normal	normal	AMBTC	W1PMP7	W1PFR5	SELML	D8S2H5	-1	1	1	1	-1	1	0.986778	0.55104	0.211025	Plants	-0.435738	True
23315	normal	normal	AMBTC	W1NRI5	W1NZ98	SELML	D8RK16	-1	1	-1	1	1	1	0.319488	0.4226	0.363191	Plants	0.103112	True
23315	normal	normal	AMBTC	W1NRI5	W1NKY1	SELML	D8RK16	-1	1	-1	1	1	1	0.319488	0.64751	0.363191	Plants	0.328022	True
23315	normal	normal	AMBTC	W1PKK6	U5DCY4	SELML	D8S4W6	-1	1	-1	1	1	1	0.202125	0.469364	0.136906	Plants	0.267239	True
23315	normal	normal	AMBTC	W1PKK6	W1P4B4	SELML	D8S4W6	1	1	-1	1	-1	1	0.202125	0.494529	0.136906	Plants	0.292404	True
23315	normal	normal	AMBTC	W1PKK6	W1PIF9	SELML	D8S4W6	-1	1	-1	1	1	1	0.202125	0.337733	0.136906	Plants	0.135608	True
23334	normal	normal	AMBTC	W1PVM0	W1PKC1	SELML	D8RSV3	-1	1	1	1	-1	1	0.486665	0.341657	0.128111	Plants	-0.145008	True
23335	normal	normal	AMBTC	U5D2P6	U5D8P3	SELML	D8RLU7	-1	1	-1	1	1	1	0.33281	0.442918	0.0902733	Plants	0.110109	True
23335	normal	normal	AMBTC	U5D2P6	W1PQ64	SELML	D8RLU7	1	1	-1	1	-1	1	0.33281	0.347111	0.0902733	Plants	0.014301	True
23335	normal	normal	AMBTC	U5D2P6	W1P4S2	SELML	D8RLU7	-1	1	-1	1	1	1	0.33281	0.27212	0.0902733	Plants	-0.0606893	True
23359	normal	normal	AMBTC	W1NYF3	W1PEX1	SELML	D8R2N7	1	1	1	1	1	1	0.236414	0.283634	0.0727734	Plants	0.0472192	True
23359	normal	normal	AMBTC	U5DC05	W1PK61	SELML	D8QT58	1	1	-1	1	-1	1	0.377755	0.4927	0.11691	Plants	0.114945	True
23359	normal	normal	AMBTC	W1PNV9	W1PGZ7	SELML	D8T3C7	-1	1	1	1	-1	1	0.238918	0.367275	0.0785202	Plants	0.128357	True
23406	normal	normal	AMBTC	W1NZD6	W1NHB5	SELML	D8S353	-1	1	-1	1	1	1	0.354119	0.333789	0.0385019	Plants	-0.0203301	True
23409	normal	normal	AMBTC	W1PRN8	W1PX26	SELML	D8RR36	-1	1	-1	1	1	1	0.52693	0.440478	0.23244	Plants	-0.0864524	True
23418	normal	normal	AMBTC	W1NV53	W1P0Q3	SELML	D8SIG5	-1	1	-1	1	1	1	0.172688	0.402119	0.202685	Plants	0.229431	True
23421	normal	normal	AMBTC	U5D6G3	W1PCA7	SELML	D8RZU7	1	1	1	1	1	1	0.538554	0.818404	0.0840619	Plants	0.279851	True
23421	normal	normal	AMBTC	U5D6G3	U5D6S8	SELML	D8RZU7	-1	1	1	1	-1	1	0.538554	0.584377	0.0840619	Plants	0.045823	True
23421	normal	normal	AMBTC	U5D6G3	W1NF92	SELML	D8RZU7	-1	1	1	1	-1	1	0.538554	0.676614	0.0840619	Plants	0.13806	True
23421	normal	normal	AMBTC	U5D6G3	W1P006	SELML	D8RZU7	-1	1	1	1	-1	1	0.538554	0.499058	0.0840619	Plants	-0.0394956	True
23421	normal	normal	AMBTC	U5D6G3	W1NFR4	SELML	D8RZU7	-1	1	1	1	-1	1	0.538554	0.559487	0.0840619	Plants	0.020933	True
23421	normal	normal	AMBTC	U5D6G3	U5D7F8	SELML	D8RZU7	-1	1	1	1	-1	1	0.538554	0.868464	0.0840619	Plants	0.32991	True
23421	normal	normal	AMBTC	U5D6G3	U5D378	SELML	D8RZU7	1	1	1	1	1	1	0.538554	0.591225	0.0840619	Plants	0.0526712	True
23426	normal	normal	AMBTC	W1NQS1	W1NU15	SELML	D8RPW7	-1	1	-1	1	1	1	0.358275	0.442924	0.283512	Plants	0.0846491	True
23428	normal	normal	AMBTC	W1P509	W1NET9	SELML	D8SSH2	-1	1	1	1	-1	1	0.198917	0.225915	0.190881	Plants	0.0269983	True
23429	normal	normal	AMBTC	W1P8W3	U5CWN8	SELML	D8SNE8	-1	1	1	1	-1	1	0.305383	0.524601	0.15279	Plants	0.219219	True
23430	normal	normal	AMBTC	W1NSS5	U5DAL6	SELML	D8QZC9	1	1	-1	1	-1	1	0.2133	0.232196	0.109467	Plants	0.0188954	True
23500	normal	normal	AMBTC	W1P752	U5CXD6	SELML	D8RF11	1	1	1	1	1	1	0.434434	0.425331	0.136476	Plants	-0.00910267	True
23500	normal	normal	AMBTC	W1P752	W1NY38	SELML	D8RF11	-1	1	1	1	-1	1	0.434434	0.463057	0.136476	Plants	0.0286229	True
23500	normal	normal	AMBTC	W1NZP8	U5CXP9	SELML	D8R7U7	-1	1	1	1	-1	1	0.497765	0.826782	0.312845	Plants	0.329017	True
23500	normal	normal	AMBTC	U5CW76	W1NIF9	SELML	D8SMJ7	1	1	1	1	1	1	0.514289	0.564347	0.184271	Plants	0.0500584	True
23500	normal	normal	AMBTC	U5CW76	W1NV61	SELML	D8SMJ7	-1	1	1	1	-1	1	0.514289	0.6002	0.184271	Plants	0.0859114	True
23515	normal	normal	AMBTC	W1NYM0	W1P4L1	SELML	D8S4M2	1	1	1	1	1	1	0.53352	0.952948	0.336698	Plants	0.419428	True
24006	normal	normal	AMBTC	W1PGW6	W1P4N8	SELML	D8SAD6	-1	1	-1	1	1	1	0.268653	0.256154	0.05883	Plants	-0.0124993	True
24006	normal	normal	AMBTC	U5D8Z9	W1P2K8	SELML	D8R474	1	1	1	1	1	1	0.366472	0.354933	0.0509947	Plants	-0.0115392	True
24007	normal	normal	AMBTC	U5CVV6	U5D688	SELML	D8RJJ7	1	1	1	1	1	1	0.28428	0.436633	0.241487	Plants	0.152352	True
24009	normal	normal	AMBTC	W1NWB2	W1NNF1	SELML	D8SQY5	-1	1	-1	1	1	1	0.185865	0.554195	0.250544	Plants	0.368331	True
24015	normal	normal	AMBTC	W1PRN9	W1PN50	SELML	D8SGQ8	1	1	1	1	1	1	0.660632	0.585198	0.628845	Plants	-0.0754342	True
24015	normal	normal	AMBTC	W1PRN9	U5D3N0	SELML	D8SGQ8			1	1			0.660632		0.628845	Plants		True
24015	normal	normal	AMBTC	W1PRN9	W1NGN1	SELML	D8SGQ8	1	1	1	1	1	1	0.660632	0.684541	0.628845	Plants	0.0239086	True
24015	normal	normal	AMBTC	W1P5V9	U5CU23	SELML	D8SG48	1	1	1	1	1	1	0.666297	0.48033	0.442091	Plants	-0.185968	True
24015	normal	normal	AMBTC	W1P5V9	W1NGD1	SELML	D8SG48	1	1	1	1	1	1	0.666297	0.52637	0.442091	Plants	-0.139927	True
24015	normal	normal	AMBTC	W1P5V9	W1PQF5	SELML	D8SG48			1	1			0.666297		0.442091	Plants		True
24015	normal	normal	AMBTC	W1P5V9	W1NZR6	SELML	D8SG48	1	1	1	1	1	1	0.666297	0.674361	0.442091	Plants	0.00806368	True
24015	normal	normal	AMBTC	W1P5V9	W1NVU6	SELML	D8SG48	1	1	1	1	1	1	0.666297	0.55854	0.442091	Plants	-0.107757	True
24015	normal	normal	AMBTC	W1P5V9	W1NMD0	SELML	D8SG48	1	1	1	1	1	1	0.666297	0.468062	0.442091	Plants	-0.198236	True
24015	normal	normal	AMBTC	W1P2Y3	W1NGI1	SELML	D8SG68	1	1	1	1	1	1	0.665975	0.691922	0.25555	Plants	0.0259473	True
24015	normal	normal	AMBTC	W1P2Y3	U5D285	SELML	D8SG68	1	1	1	1	1	1	0.665975	0.531087	0.25555	Plants	-0.134888	True
24015	normal	normal	AMBTC	W1P2Y3	W1P8Y6	SELML	D8SG68	1	1	1	1	1	1	0.665975	0.61451	0.25555	Plants	-0.0514651	True
24015	normal	normal	AMBTC	W1P2Y3	W1P3G6	SELML	D8SG68	1	1	1	1	1	1	0.665975	0.5755	0.25555	Plants	-0.0904753	True
24015	normal	normal	AMBTC	W1P2Y3	U5CZ16	SELML	D8SG68	1	1	1	1	1	1	0.665975	0.596514	0.25555	Plants	-0.0694612	True
24015	normal	normal	AMBTC	W1P2Y3	W1NN85	SELML	D8SG68	1	1	1	1	1	1	0.665975	0.597769	0.25555	Plants	-0.0682062	True
24015	normal	normal	AMBTC	W1P2Y3	W1NF71	SELML	D8SG68	1	1	1	1	1	1	0.665975	0.571572	0.25555	Plants	-0.0944025	True
24015	normal	normal	AMBTC	W1P2Y3	W1NIR6	SELML	D8SG68	1	1	1	1	1	1	0.665975	0.67261	0.25555	Plants	0.00663531	True
24015	normal	normal	AMBTC	W1P2Y3	U5DA01	SELML	D8SG68	1	1	1	1	1	1	0.665975	0.62772	0.25555	Plants	-0.0382552	True
24015	normal	normal	AMBTC	W1P2Y3	W1P8W4	SELML	D8SG68	1	1	1	1	1	1	0.665975	0.749367	0.25555	Plants	0.0833923	True
24015	normal	normal	AMBTC	W1P2Y3	W1P590	SELML	D8SG68	-1	1	1	1	-1	1	0.665975	0.556395	0.25555	Plants	-0.109579	True
24015	normal	normal	AMBTC	W1P2Y3	U5DC37	SELML	D8SG68	1	1	1	1	1	1	0.665975	0.488267	0.25555	Plants	-0.177708	True
24015	normal	normal	AMBTC	W1P2Y3	U5CZK2	SELML	D8SG68	1	1	1	1	1	1	0.665975	0.706521	0.25555	Plants	0.0405463	True
24015	normal	normal	AMBTC	W1P2Y3	U5D6A9	SELML	D8SG68	1	1	1	1	1	1	0.665975	0.493799	0.25555	Plants	-0.172176	True
24015	normal	normal	AMBTC	W1P2Y3	W1PNX0	SELML	D8SG68	-1	1	1	1	-1	1	0.665975	0.520228	0.25555	Plants	-0.145747	True
24015	normal	normal	AMBTC	W1P2Y3	W1NL50	SELML	D8SG68	1	1	1	1	1	1	0.665975	0.781169	0.25555	Plants	0.115194	True
24015	normal	normal	AMBTC	W1P2Y3	W1NLK8	SELML	D8SG68	-1	1	1	1	-1	1	0.665975	0.515648	0.25555	Plants	-0.150327	True
24015	normal	normal	AMBTC	W1P2Y3	W1NHQ9	SELML	D8SG68	1	1	1	1	1	1	0.665975	0.644075	0.25555	Plants	-0.0218995	True
24015	normal	normal	AMBTC	W1P2Y3	U5DIG2	SELML	D8SG68	1	1	1	1	1	1	0.665975	0.765487	0.25555	Plants	0.0995124	True
24015	normal	normal	AMBTC	W1P2Y3	W1NY76	SELML	D8SG68	1	1	1	1	1	1	0.665975	0.719154	0.25555	Plants	0.0531794	True
24015	normal	normal	AMBTC	W1P2Y3	W1NGX3	SELML	D8SG68	1	1	1	1	1	1	0.665975	0.636588	0.25555	Plants	-0.0293865	True
24015	normal	normal	AMBTC	W1P2Y3	W1P7X0	SELML	D8SG68	-1	1	1	1	-1	1	0.665975	0.671052	0.25555	Plants	0.00507708	True
24015	normal	normal	AMBTC	W1P2Y3	W1NPK0	SELML	D8SG68	1	1	1	1	1	1	0.665975	0.395518	0.25555	Plants	-0.270457	True
24015	normal	normal	AMBTC	W1P2Y3	U5D328	SELML	D8SG68	1	1	1	1	1	1	0.665975	0.706906	0.25555	Plants	0.0409308	True
24015	normal	normal	AMBTC	W1P2Y3	W1NFX4	SELML	D8SG68	1	1	1	1	1	1	0.665975	0.737294	0.25555	Plants	0.071319	True
24015	normal	normal	AMBTC	W1P2Y3	W1PGA7	SELML	D8SG68	1	1	1	1	1	1	0.665975	0.705834	0.25555	Plants	0.0398592	True
24015	normal	normal	AMBTC	W1P2Y3	W1P9T1	SELML	D8SG68	1	1	1	1	1	1	0.665975	0.471129	0.25555	Plants	-0.194846	True
24015	normal	normal	AMBTC	W1P2Y3	W1NJS9	SELML	D8SG68	1	1	1	1	1	1	0.665975	0.586561	0.25555	Plants	-0.0794144	True
24015	normal	normal	AMBTC	W1P2Y3	W1PZ55	SELML	D8SG68	1	1	1	1	1	1	0.665975	0.628525	0.25555	Plants	-0.0374501	True
24015	normal	normal	AMBTC	W1P2Y3	W1P844	SELML	D8SG68	1	1	1	1	1	1	0.665975	0.703417	0.25555	Plants	0.037442	True
24015	normal	normal	AMBTC	W1P2Y3	W1NES9	SELML	D8SG68	1	1	1	1	1	1	0.665975	0.522755	0.25555	Plants	-0.14322	True
24015	normal	normal	AMBTC	W1P2Y3	W1P1B2	SELML	D8SG68	-1	1	1	1	-1	1	0.665975	0.416839	0.25555	Plants	-0.249136	True
24015	normal	normal	AMBTC	W1P2Y3	W1NJR2	SELML	D8SG68	1	1	1	1	1	1	0.665975	0.606693	0.25555	Plants	-0.0592817	True
24015	normal	normal	AMBTC	W1P2Y3	W1PJQ9	SELML	D8SG68	1	1	1	1	1	1	0.665975	0.684556	0.25555	Plants	0.0185814	True
24015	normal	normal	AMBTC	W1P2Y3	W1NRM7	SELML	D8SG68	1	1	1	1	1	1	0.665975	0.794321	0.25555	Plants	0.128346	True
24015	normal	normal	AMBTC	W1P2Y3	W1NL69	SELML	D8SG68	1	1	1	1	1	1	0.665975	0.46352	0.25555	Plants	-0.202455	True
24015	normal	normal	AMBTC	W1P2Y3	W1PUK6	SELML	D8SG68	1	1	1	1	1	1	0.665975	0.579985	0.25555	Plants	-0.0859902	True
24015	normal	normal	AMBTC	W1P2Y3	W1NDX2	SELML	D8SG68	1	1	1	1	1	1	0.665975	0.584965	0.25555	Plants	-0.08101	True
24015	normal	normal	AMBTC	W1P2Y3	W1NR80	SELML	D8SG68	1	1	1	1	1	1	0.665975	0.645468	0.25555	Plants	-0.0205065	True
24031	normal	normal	AMBTC	W1NXC2	W1NJ14	SELML	D8S241	1	1	1	1	1	1	0.536409	0.500306	0.0698805	Plants	-0.0361023	True
24034	normal	normal	AMBTC	W1P9B0	U5D3I1	SELML	D8TA02	1	1	-1	1	-1	1	0.272103	0.529535	0.0530439	Plants	0.257432	True
24054	normal	normal	AMBTC	W1NDW2	W1P7T9	SELML	D8RHJ9	1	1	-1	1	-1	1	0.184087	0.11583	0.0272057	Plants	-0.0682573	True
24055	normal	normal	AMBTC	W1PW82	W1PUE3	SELML	D8R731	-1	1	1	1	-1	1	0.394687	0.209409	0.0558329	Plants	-0.185277	True
24055	normal	normal	AMBTC	W1NKX0	W1PGG6	SELML	D8RZE3	-1	1	-1	1	1	1	0.395983	0.328861	0.0285486	Plants	-0.0671221	True
24055	normal	normal	AMBTC	W1NKX0	W1NKH8	SELML	D8RZE3	-1	1	-1	1	1	1	0.395983	0.373904	0.0285486	Plants	-0.0220793	True
24056	normal	normal	AMBTC	U5DD83	U5D925	SELML	D8RHE2	1	1	1	1	1	1	0.374242	0.576521	0.0278972	Plants	0.202278	True
24056	normal	normal	AMBTC	U5DD83	W1PHD0	SELML	D8RHE2	1	1	1	1	1	1	0.374242	0.205184	0.0278972	Plants	-0.169058	True
24056	normal	normal	AMBTC	U5DD83	W1NVN4	SELML	D8RHE2	1	1	1	1	1	1	0.374242	0.5336	0.0278972	Plants	0.159358	True
24057	normal	normal	AMBTC	W1P3A3	W1NTC3	SELML	D8SX29	1	1	-1	1	-1	1	0.251113	0.299241	0.0601836	Plants	0.048128	True
24057	normal	normal	AMBTC	W1P3A3	W1PHE8	SELML	D8SX29	1	1	-1	1	-1	1	0.251113	0.184126	0.0601836	Plants	-0.0669872	True
24057	normal	normal	AMBTC	W1P3A3	U5DHR5	SELML	D8SX29	-1	1	-1	1	1	1	0.251113	0.419484	0.0601836	Plants	0.168371	True
24058	normal	normal	AMBTC	W1PM14	W1PC27	SELML	D8RSU2	-1	1	1	1	-1	1	0.291695	0.384726	0.1302	Plants	0.0930302	True
24064	normal	normal	AMBTC	W1NHD1	W1NVV6	SELML	D8QVC2			1	1			0.267133		0.740294	Plants		True
24064	normal	normal	AMBTC	W1NHD1	W1P8I1	SELML	D8QVC2	-1	1	1	1	-1	1	0.267133	0.607368	0.740294	Plants	0.340236	True
24067	normal	normal	AMBTC	W1P1V9	W1NDY9	SELML	D8SD06	1	1	1	1	1	1	0.260933	0.143531	0.0781369	Plants	-0.117402	True
24068	normal	normal	AMBTC	W1P8J1	W1P2L3	SELML	D8SIS7	-1	1	1	1	-1	1	0.0801531	0.120367	0.0539853	Plants	0.0402138	True
24068	normal	normal	AMBTC	W1PUG2	W1PMT5	SELML	D8QWU7	1	1	1	1	1	1	0.17355	0.574244	0.0622324	Plants	0.400693	True
24068	normal	normal	AMBTC	W1NHJ8	U5CWS0	SELML	D8QZB1	-1	1	1	1	-1	1	0.422151	0.202491	0.0184181	Plants	-0.219659	True
24068	normal	normal	AMBTC	W1PDY0	W1NEC3	SELML	D8R3P5	-1	1	-1	1	1	1	0.10097	0.253057	0.0517721	Plants	0.152088	True
24068	normal	normal	AMBTC	W1PWM7	W1PBP9	SELML	D8SMW3	1	1	1	1	1	1	0.263612	0.561735	0.159844	Plants	0.298123	True
24071	normal	normal	AMBTC	W1PEZ6	W1P9A4	SELML	D8RMS2	-1	1	1	1	-1	1	0.673586	0.306203	0.0738926	Plants	-0.367382	True
24071	normal	normal	AMBTC	W1PEZ6	W1NHH6	SELML	D8RMS2	1	1	1	1	1	1	0.673586	0.161595	0.0738926	Plants	-0.51199	True
24073	normal	normal	AMBTC	U5D6L1	W1NRB8	SELML	D8SWR5	-1	1	1	1	-1	1	0.26145	0.390287	0.0677514	Plants	0.128837	True
24078	normal	normal	AMBTC	W1P0A6	W1PLY7	SELML	D8RJ89	1	1	1	1	1	1	0.280073	0.508452	0.0787595	Plants	0.228378	True
24089	normal	normal	AMBTC	W1NDY0	U5CZR8	SELML	D8RDX4	-1	1	-1	1	1	1	0.737412	0.229229	0.0313113	Plants	-0.508183	True
24089	normal	normal	AMBTC	W1NV58	U5CZC5	SELML	D8SLL5	1	1	1	1	1	1	0.202756	0.420026	0.0792365	Plants	0.21727	True
24092	normal	normal	AMBTC	U5CQ65	U5CXG4	SELML	D8QTJ4	1	1	1	1	1	1	0.370601	0.895023	0.0603145	Plants	0.524422	True
24093	normal	normal	AMBTC	W1PB71	W1PLL0	SELML	D8QTC3	-1	1	1	1	-1	1	0.235993	0.300563	0.0730044	Plants	0.0645703	True
24096	normal	normal	AMBTC	W1PZ89	U5CQV7	SELML	D8SZ79	1	1	-1	1	-1	1	0.892452	0.873381	0.737828	Plants	-0.0190706	True
24096	normal	normal	AMBTC	W1PZ89	W1NKP7	SELML	D8SZ79	1	1	-1	1	-1	1	0.892452	0.362081	0.737828	Plants	-0.53037	True
24096	normal	normal	AMBTC	W1PZ89	W1PUD6	SELML	D8SZ79	1	1	-1	1	-1	1	0.892452	0.694672	0.737828	Plants	-0.197779	True
24115	normal	normal	AMBTC	W1PD52	W1NIG7	SELML	D8RUD7	1	1	1	1	1	1	0.638967	0.53646	0.564145	Plants	-0.102507	True
24128	normal	normal	AMBTC	W1PHL9	U5D100	SELML	D8SV10	1	1	1	1	1	1	0.63487	0.41525	0.0681666	Plants	-0.21962	True
24206	normal	normal	AMBTC	W1NVD0	W1NIS4	SELML	D8RDY8	1	1	1	1	1	1	0.429456	0.511095	0.0759781	Plants	0.0816394	True
24206	normal	normal	AMBTC	W1NVD0	U5CZ69	SELML	D8RDY8	1	1	1	1	1	1	0.429456	0.423419	0.0759781	Plants	-0.00603658	True
24206	normal	normal	AMBTC	W1NVD0	W1PQZ3	SELML	D8RDY8	1	1	1	1	1	1	0.429456	0.186879	0.0759781	Plants	-0.242576	True
24209	normal	normal	AMBTC	W1PVA9	U5CWB4	SELML	D8T682	-1	1	1	1	-1	1	0.45201	0.379727	0.0995647	Plants	-0.0722834	True
24221	normal	normal	AMBTC	W1NGV9	W1PAW1	SELML	D8SD68	1	1	1	1	1	1	0.687008	0.520146	0.504531	Plants	-0.166862	True
24221	normal	normal	AMBTC	W1PKN3	W1PEP1	SELML	D8SSI0	1	1	1	1	1	1	0.308727	0.952391	0.399176	Plants	0.643664	True
24223	normal	normal	AMBTC	U5CRI6	W1PN85	SELML	D8REF1	1	1	-1	1	-1	1	0.611039	0.754989	0.140421	Plants	0.14395	True
24223	normal	normal	AMBTC	U5CRI6	W1PGN4	SELML	D8REF1	-1	1	-1	1	1	1	0.611039	0.702921	0.140421	Plants	0.091882	True
24282	normal	normal	AMBTC	U5D813	W1PRU6	SELML	D8RES7	1	1	-1	1	-1	1	0.609702	0.651477	0.416517	Plants	0.041775	True
24282	normal	normal	AMBTC	U5D813	W1NHW1	SELML	D8RES7	1	1	-1	1	-1	1	0.609702	0.820417	0.416517	Plants	0.210715	True
24282	normal	normal	AMBTC	U5D813	W1P148	SELML	D8RES7	-1	1	-1	1	1	1	0.609702	0.822936	0.416517	Plants	0.213234	True
24282	normal	normal	AMBTC	U5D813	W1NQF0	SELML	D8RES7	1	1	-1	1	-1	1	0.609702	0.420241	0.416517	Plants	-0.189462	True
24282	normal	normal	AMBTC	U5D813	U5D6E4	SELML	D8RES7	1	1	-1	1	-1	1	0.609702	0.459426	0.416517	Plants	-0.150276	True
24286	normal	normal	AMBTC	W1PC10	U5D5E4	SELML	D8T6U4	1	1	1	1	1	1	0.54227	0.371601	0.146157	Plants	-0.170669	True
24286	normal	normal	AMBTC	W1PII6	U5DB53	SELML	D8SQ89	1	1	1	1	1	1	0.43917	0.697877	0.297981	Plants	0.258707	True
24286	normal	normal	AMBTC	W1PII6	U5DD47	SELML	D8SQ89	-1	1	1	1	-1	1	0.43917	0.732592	0.297981	Plants	0.293422	True
24286	normal	normal	AMBTC	W1PII6	U5D5Z8	SELML	D8SQ89	1	1	1	1	1	1	0.43917	0.783461	0.297981	Plants	0.34429	True
24286	normal	normal	AMBTC	W1PNA0	W1P132	SELML	D8SYL5	1	1	-1	1	-1	1	0.646975	0.919868	0.199642	Plants	0.272893	True
24286	normal	normal	AMBTC	U5D5I0	U5DCG5	SELML	D8RXN2	-1	1	1	1	-1	1	0.664124	0.752271	0.331291	Plants	0.0881474	True
24286	normal	normal	AMBTC	W1Q032	W1P2V0	SELML	D8QNU0	1	1	1	1	1	1	0.966025	0.998754	0.511231	Plants	0.0327293	True
24286	normal	normal	AMBTC	W1Q032	U5DBR3	SELML	D8QNU0	-1	1	1	1	-1	1	0.966025	0.769235	0.511231	Plants	-0.19679	True
24286	normal	normal	AMBTC	W1Q032	W1NNF5	SELML	D8QNU0	1	1	1	1	1	1	0.966025	0.646787	0.511231	Plants	-0.319238	True
24286	normal	normal	AMBTC	W1NH38	W1PJU5	SELML	D8RLS5	-1	1	-1	1	1	1	0.579679	0.808409	0.382268	Plants	0.22873	True
24286	normal	normal	AMBTC	W1NH38	W1NTB6	SELML	D8RLS5	-1	1	-1	1	1	1	0.579679	0.727624	0.382268	Plants	0.147946	True
24296	normal	normal	AMBTC	W1NGD3	U5DAA2	SELML	D8RU89	-1	1	-1	1	1	1	0.846159	0.587056	0.53561	Plants	-0.259103	True
24296	normal	normal	AMBTC	W1NGD3	U5DAD1	SELML	D8RU89	1	1	-1	1	-1	1	0.846159	0.75293	0.53561	Plants	-0.0932293	True
24296	normal	normal	AMBTC	W1NUU9	W1PXV1	SELML	D8SZ71	-1	1	1	1	-1	1	0.841414	0.748729	0.221316	Plants	-0.0926845	True
24296	normal	normal	AMBTC	W1NUU9	W1NUV0	SELML	D8SZ71	-1	1	1	1	-1	1	0.841414	0.983652	0.221316	Plants	0.142239	True
24296	normal	normal	AMBTC	W1NUU9	W1PJ05	SELML	D8SZ71	-1	1	1	1	-1	1	0.841414	0.886451	0.221316	Plants	0.0450373	True
24296	normal	normal	AMBTC	W1NID9	W1NKY2	SELML	D8SSJ6	-1	1	1	1	-1	1	0.567663	0.718371	0.630619	Plants	0.150708	True
24296	normal	normal	AMBTC	W1NID9	W1PRR6	SELML	D8SSJ6	1	1	1	1	1	1	0.567663	0.812437	0.630619	Plants	0.244774	True
24296	normal	normal	AMBTC	W1NID9	W1PNP8	SELML	D8SSJ6	-1	1	1	1	-1	1	0.567663	0.892264	0.630619	Plants	0.324602	True
24299	normal	normal	AMBTC	W1NZJ8	W1NMQ3	SELML	D8SIM3			1	1			0.859781		0.665462	Plants		True
24320	normal	normal	AMBTC	W1NQK7	W1NGS1	SELML	D8SYR3	-1	1	1	1	-1	1	0.848138	0.283228	0.130093	Plants	-0.56491	True
24320	normal	normal	AMBTC	W1PJC0	W1P4Z1	SELML	D8S4C8	-1	1	1	1	-1	1	0.490823	0.828806	0.752992	Plants	0.337983	True
24320	normal	normal	AMBTC	W1PJC0	U5D9Z5	SELML	D8S4C8	-1	1	1	1	-1	1	0.490823	0.79326	0.752992	Plants	0.302437	True
24320	normal	normal	AMBTC	W1PJC0	W1NHL6	SELML	D8S4C8	-1	1	1	1	-1	1	0.490823	0.392485	0.752992	Plants	-0.0983377	True
24326	normal	normal	AMBTC	W1P1R9	U5D5T9	SELML	D8RMX9	-1	1	1	1	-1	1	0.38019	0.706206	0.372167	Plants	0.326016	True
24326	normal	normal	AMBTC	W1P1R9	W1NGU8	SELML	D8RMX9	1	1	1	1	1	1	0.38019	0.614298	0.372167	Plants	0.234108	True
24326	normal	normal	AMBTC	W1P1R9	W1PL75	SELML	D8RMX9	-1	1	1	1	-1	1	0.38019	0.577163	0.372167	Plants	0.196973	True
24326	normal	normal	AMBTC	W1P1R9	W1PDW9	SELML	D8RMX9	-1	1	1	1	-1	1	0.38019	0.705473	0.372167	Plants	0.325283	True
24343	normal	normal	AMBTC	W1NNK5	W1PLN2	SELML	D8RG24	-1	1	-1	1	1	1	0.433476	0.394955	0.0640174	Plants	-0.038521	True
24343	normal	normal	AMBTC	W1NNK5	U5CZ56	SELML	D8RG24	1	1	-1	1	-1	1	0.433476	0.426188	0.0640174	Plants	-0.00728798	True
24348	normal	normal	AMBTC	U5D660	W1NHP2	SELML	D8T7P5	-1	1	1	1	-1	1	0.17463	0.6689	0.0640899	Plants	0.49427	True
24348	normal	normal	AMBTC	W1PK13	W1NMW7	SELML	D8SF55	-1	1	-1	1	1	1	0.33045	0.457544	0.151802	Plants	0.127094	True
24349	normal	normal	AMBTC	W1P146	W1PCB9	SELML	D8RYX6	1	1	1	1	1	1	0.345333	0.258542	0.13023	Plants	-0.0867905	True
24349	normal	normal	AMBTC	W1P146	W1NZV6	SELML	D8RYX6	1	1	1	1	1	1	0.345333	0.165163	0.13023	Plants	-0.18017	True
24349	normal	normal	AMBTC	U5DAY0	W1P7H6	SELML	D8SQ88	1	1	1	1	1	1	0.373466	0.385292	0.251306	Plants	0.0118259	True
24349	normal	normal	AMBTC	U5DAY0	W1PKX1	SELML	D8SQ88	1	1	1	1	1	1	0.373466	0.358789	0.251306	Plants	-0.0146771	True
24349	normal	normal	AMBTC	W1PI04	U5DAC8	SELML	D8S806	-1	1	-1	1	1	1	0.743386	0.444107	0.11697	Plants	-0.299279	True
24349	normal	normal	AMBTC	W1PI04	W1PSD6	SELML	D8S806	-1	1	-1	1	1	1	0.743386	0.419837	0.11697	Plants	-0.323549	True
24349	normal	normal	AMBTC	W1PI04	W1NL75	SELML	D8S806	-1	1	-1	1	1	1	0.743386	0.404649	0.11697	Plants	-0.338737	True
24349	normal	normal	AMBTC	W1NE61	U5D4H5	SELML	D8R1S8	-1	1	1	1	-1	1	0.275101	0.186441	0.0829156	Plants	-0.0886606	True
24349	normal	normal	AMBTC	W1NE61	W1PLD0	SELML	D8R1S8	1	1	1	1	1	1	0.275101	0.337175	0.0829156	Plants	0.0620734	True
24350	normal	normal	AMBTC	U5CPW7	U5D1H0	SELML	D8SCF4	1	1	-1	1	-1	1	0.404155	0.52453	0.203307	Plants	0.120375	True
24356	normal	normal	AMBTC	W1NZ40	U5D818	SELML	D8RB45	1	1	-1	1	-1	1	0.450469	0.499056	0.489612	Plants	0.0485873	True
24361	normal	normal	AMBTC	W1P4Q7	U5CPT4	SELML	D8SYB3	-1	1	-1	1	1	1	0.418624	0.365654	0.0418585	Plants	-0.0529696	True
24414	normal	normal	AMBTC	W1P3Q2	W1P3D3	SELML	D8R986					1	1		0.357197	0.381852	Plants		True
24414	normal	normal	AMBTC	W1NES1	W1PI28	SELML	D8S423	-1	1	-1	1	1	1	0.37824	0.434004	0.122295	Plants	0.0557637	True
24414	normal	normal	AMBTC	W1NES1	W1NGQ3	SELML	D8S423			-1	1			0.37824		0.122295	Plants		True
26312	normal	normal	AMBTC	W1PA43	W1P7S1	SELML	D8S1G0	-1	1	-1	1	1	1	0.505105	0.553681	0.145339	Plants	0.0485752	True
27000	normal	normal	AMBTC	W1NM67	U5DCV8	SELML	D8QV09	-1	1	-1	1	1	1	0.706871	0.45077	0.409484	Plants	-0.256101	True
27000	normal	normal	AMBTC	W1NM67	W1NZV5	SELML	D8QV09	1	1	-1	1	-1	1	0.706871	0.642123	0.409484	Plants	-0.0647487	True
27000	normal	normal	AMBTC	W1NM67	U5D1H2	SELML	D8QV09	1	1	-1	1	-1	1	0.706871	0.403251	0.409484	Plants	-0.303621	True
27000	normal	normal	AMBTC	W1NM67	U5CYF2	SELML	D8QV09	1	1	-1	1	-1	1	0.706871	0.828947	0.409484	Plants	0.122075	True
27000	normal	normal	AMBTC	W1NM67	W1PNX7	SELML	D8QV09	1	1	-1	1	-1	1	0.706871	0.868285	0.409484	Plants	0.161414	True
27000	normal	normal	AMBTC	W1NM67	W1PXU7	SELML	D8QV09	-1	1	-1	1	1	1	0.706871	0.703416	0.409484	Plants	-0.00345558	True
27000	normal	normal	AMBTC	W1NM67	U5CVR4	SELML	D8QV09	1	1	-1	1	-1	1	0.706871	0.756405	0.409484	Plants	0.0495333	True
27000	normal	normal	AMBTC	W1NM67	W1PVJ4	SELML	D8QV09	-1	1	-1	1	1	1	0.706871	0.407124	0.409484	Plants	-0.299748	True
27000	normal	normal	AMBTC	W1NM67	W1PRC1	SELML	D8QV09	1	1	-1	1	-1	1	0.706871	0.593459	0.409484	Plants	-0.113412	True
27000	normal	normal	AMBTC	W1NM67	U5D2T2	SELML	D8QV09	1	1	-1	1	-1	1	0.706871	0.655679	0.409484	Plants	-0.051192	True
27001	normal	normal	AMBTC	W1PC36	W1PM45	SELML	D8RDC5	1	1	-1	1	-1	1	0.416836	0.677373	0.299041	Plants	0.260537	True
27003	normal	normal	AMBTC	W1P316	W1PAH5	SELML	D8T3I7	1	1	1	1	1	1	0.770648	0.388219	0.290059	Plants	-0.382429	True
27003	normal	normal	AMBTC	W1P316	W1P990	SELML	D8T3I7	1	1	1	1	1	1	0.770648	0.417493	0.290059	Plants	-0.353155	True
27003	normal	normal	AMBTC	W1P316	W1PUN5	SELML	D8T3I7	1	1	1	1	1	1	0.770648	0.676906	0.290059	Plants	-0.0937418	True
27003	normal	normal	AMBTC	W1P316	W1P687	SELML	D8T3I7	1	1	1	1	1	1	0.770648	0.451386	0.290059	Plants	-0.319262	True
27005	normal	normal	AMBTC	W1P084	W1PW09	SELML	D8SGD4	1	1	-1	1	-1	1	0.856225	0.787488	0.0907402	Plants	-0.0687373	True
27005	normal	normal	AMBTC	U5D8C2	W1PBL1	SELML	D8TEJ4	1	1	-1	1	-1	1	0.495491	0.6531	0.206438	Plants	0.157608	True
27005	normal	normal	AMBTC	U5D8C2	W1NVT1	SELML	D8TEJ4	1	1	-1	1	-1	1	0.495491	0.647988	0.206438	Plants	0.152496	True
27007	normal	normal	AMBTC	W1PDH2	W1PUU9	SELML	D8SIB6	1	1	1	1	1	1	0.570929	0.551226	0.19872	Plants	-0.0197034	True
27007	normal	normal	AMBTC	W1PDH2	W1P4E2	SELML	D8SIB6	-1	1	1	1	-1	1	0.570929	0.530311	0.19872	Plants	-0.0406187	True
27007	normal	normal	AMBTC	W1PDH2	U5DG95	SELML	D8SIB6	1	1	1	1	1	1	0.570929	0.442752	0.19872	Plants	-0.128177	True
27007	normal	normal	AMBTC	W1NQV2	U5DFQ4	SELML	D8TDP1	1	1	-1	1	-1	1	0.671269	0.763189	0.134446	Plants	0.0919204	True
27007	normal	normal	AMBTC	W1NQV2	U5CXK9	SELML	D8TDP1	1	1	-1	1	-1	1	0.671269	0.898603	0.134446	Plants	0.227334	True
27007	normal	normal	AMBTC	W1NQV2	W1P6Z1	SELML	D8TDP1	-1	1	-1	1	1	1	0.671269	0.602568	0.134446	Plants	-0.0687009	True
27007	normal	normal	AMBTC	W1NQV2	W1PUN8	SELML	D8TDP1	1	1	-1	1	-1	1	0.671269	0.888823	0.134446	Plants	0.217554	True
27007	normal	normal	AMBTC	W1NQV2	W1NT12	SELML	D8TDP1	1	1	-1	1	-1	1	0.671269	0.444168	0.134446	Plants	-0.227101	True
27007	normal	normal	AMBTC	W1P0Y7	W1P874	SELML	D8QUW1			1	1			0.657167		0.443397	Plants		True
27008	normal	normal	AMBTC	W1PV14	U5CZP3	SELML	D8SMM4	1	1	-1	1	-1	1	0.7083	0.863557	0.127996	Plants	0.155258	True
28018	normal	normal	AMBTC	W1P841	W1P5N2	SELML	D8RBK8	1	1	1	1	1	1	0.762189	0.404284	0.241594	Plants	-0.357905	True
28242	normal	normal	AMBTC	W1NNW6	U5CYW2	SELML	D8SI72	-1	1	1	1	-1	1	0.543261	0.687246	0.109157	Plants	0.143985	True
28242	normal	normal	AMBTC	W1NNW6	W1P816	SELML	D8SI72	1	1	1	1	1	1	0.543261	0.667212	0.109157	Plants	0.12395	True
28242	normal	normal	AMBTC	W1NNW6	W1PXX0	SELML	D8SI72	1	1	1	1	1	1	0.543261	0.477328	0.109157	Plants	-0.0659332	True
30314	normal	normal	AMBTC	W1PJX4	W1P236	SELML	D8SN21	1	1	1	1	1	1	0.431981	0.469875	0.124112	Plants	0.0378939	True
30457	normal	normal	AMBTC	U5DIG7	U5CZB3	SELML	D8S4W5	-1	1	1	1	-1	1	0.364487	0.227691	0.0646793	Plants	-0.136796	True
30540	normal	normal	AMBTC	W1PM26	W1PUF9	SELML	D8QXS9	-1	1	-1	1	1	1	0.515635	0.459481	0.67187	Plants	-0.0561539	True
30540	normal	normal	AMBTC	W1NXS5	W1PUK7	SELML	D8QP81	-1	1	1	1	-1	1	0.292571	0.319365	0.137378	Plants	0.0267932	True
30540	normal	normal	AMBTC	W1PGI6	W1PEG4	SELML	D8RBQ7	1	1	1	1	1	1	0.603014	0.619299	0.477803	Plants	0.0162843	True
30540	normal	normal	AMBTC	W1PGI6	U5CUH8	SELML	D8RBQ7	1	1	1	1	1	1	0.603014	0.507771	0.477803	Plants	-0.0952431	True
30540	normal	normal	AMBTC	W1PGW3	W1PE71	SELML	D8QP73	-1	1	1	1	-1	1	0.259793	0.380043	0.14134	Plants	0.12025	True
30540	normal	normal	AMBTC	W1PGW3	W1PCF5	SELML	D8QP73	-1	1	1	1	-1	1	0.259793	0.515339	0.14134	Plants	0.255545	True
30540	normal	normal	AMBTC	W1PGW3	W1PCA1	SELML	D8QP73	1	1	1	1	1	1	0.259793	0.514639	0.14134	Plants	0.254846	True
30540	normal	normal	AMBTC	W1PGW3	W1PMX3	SELML	D8QP73	-1	1	1	1	-1	1	0.259793	0.453333	0.14134	Plants	0.19354	True
30546	normal	normal	AMBTC	W1PY03	W1PFQ0	SELML	D8RPY6	-1	1	1	1	-1	1	0.243735	0.361817	0.177354	Plants	0.118082	True
30620	normal	normal	AMBTC	W1NE16	W1PPJ1	SELML	D8SUV4	1	1	1	1	1	1	0.458441	0.404987	0.166687	Plants	-0.0534543	True
31003	normal	normal	AMBTC	W1NMG1	W1NSQ5	SELML	D8SL35	1	1	-1	1	-1	1	0.697534	0.651891	0.456824	Plants	-0.0456432	True
31008	normal	normal	AMBTC	W1P8N6	W1PCU1	SELML	D8SI09	1	1	-1	1	-1	1	0.486314	0.358095	0.178864	Plants	-0.128219	True
31008	normal	normal	AMBTC	W1P8N6	U5CZK8	SELML	D8SI09	-1	1	-1	1	1	1	0.486314	0.436868	0.178864	Plants	-0.0494464	True
31016	normal	normal	AMBTC	W1P346	W1NIV0	SELML	D8SB05	-1	1	-1	1	1	1	0.389831	0.668106	0.41903	Plants	0.278275	True
31042	normal	normal	AMBTC	U5D1V9	W1NWL6	SELML	D8S2I3	1	1	1	1	1	1	0.351851	0.483046	0.267597	Plants	0.131195	True
31042	normal	normal	AMBTC	U5D1V9	W1P8V1	SELML	D8S2I3	1	1	1	1	1	1	0.351851	0.897083	0.267597	Plants	0.545232	True
31044	normal	normal	AMBTC	W1P582	W1NSD1	SELML	D8RWC8	1	1	-1	1	-1	1	0.715846	0.470692	0.298339	Plants	-0.245154	True
31044	normal	normal	AMBTC	W1P582	W1NV41	SELML	D8RWC8	1	1	-1	1	-1	1	0.715846	0.713458	0.298339	Plants	-0.00238754	True
31044	normal	normal	AMBTC	W1P582	W1PSC8	SELML	D8RWC8	1	1	-1	1	-1	1	0.715846	0.686351	0.298339	Plants	-0.0294949	True
31044	normal	normal	AMBTC	W1P582	W1PZV1	SELML	D8RWC8	-1	1	-1	1	1	1	0.715846	0.75746	0.298339	Plants	0.0416141	True
31044	normal	normal	AMBTC	W1P582	W1PPP9	SELML	D8RWC8	1	1	-1	1	-1	1	0.715846	0.709242	0.298339	Plants	-0.00660345	True
31044	normal	normal	AMBTC	W1P582	W1P1Y8	SELML	D8RWC8	1	1	-1	1	-1	1	0.715846	0.690619	0.298339	Plants	-0.0252266	True
31044	normal	normal	AMBTC	W1P582	W1NTI0	SELML	D8RWC8	1	1	-1	1	-1	1	0.715846	0.914252	0.298339	Plants	0.198406	True
31048	normal	normal	AMBTC	W1Q0D4	W1PJH3	SELML	D8SS08	1	1	1	1	1	1	0.432535	0.576692	0.455845	Plants	0.144157	True
31048	normal	normal	AMBTC	W1Q0D4	U5CNN8	SELML	D8SS08	-1	1	1	1	-1	1	0.432535	0.388751	0.455845	Plants	-0.043784	True
31048	normal	normal	AMBTC	W1Q0D4	U5D853	SELML	D8SS08	1	1	1	1	1	1	0.432535	0.654646	0.455845	Plants	0.222112	True
31048	normal	normal	AMBTC	W1Q0D4	W1PN90	SELML	D8SS08	1	1	1	1	1	1	0.432535	0.644502	0.455845	Plants	0.211967	True
31048	normal	normal	AMBTC	W1Q0D4	W1PLF3	SELML	D8SS08	1	1	1	1	1	1	0.432535	0.649787	0.455845	Plants	0.217252	True
31048	normal	normal	AMBTC	W1Q0D4	W1PZA1	SELML	D8SS08	1	1	1	1	1	1	0.432535	0.534035	0.455845	Plants	0.1015	True
31048	normal	normal	AMBTC	W1Q0D4	W1PXA5	SELML	D8SS08	1	1	1	1	1	1	0.432535	0.7564	0.455845	Plants	0.323866	True
31048	normal	normal	AMBTC	W1Q0D4	W1PUH4	SELML	D8SS08	1	1	1	1	1	1	0.432535	0.720602	0.455845	Plants	0.288067	True
31052	normal	normal	AMBTC	U5D317	U5DFR5	SELML	D8SWT8	1	1	1	1	1	1	0.437728	0.777008	0.288545	Plants	0.33928	True
31060	normal	normal	AMBTC	U5CZU3	W1PNN7	SELML	D8QVZ2			-1	1			0.401913		0.653512	Plants		True
31060	normal	normal	AMBTC	U5D6X0	U5D9X0	SELML	D8SSS2	-1	1	1	1	-1	1	0.317587	0.318874	0.0754501	Plants	0.00128748	True
31060	normal	normal	AMBTC	W1NLW6	U5CWB8	SELML	D8RU29	1	1	-1	1	-1	1	0.630052	0.473217	0.163925	Plants	-0.156835	True
31060	normal	normal	AMBTC	W1NLW6	W1NJM7	SELML	D8RU29	1	1	-1	1	-1	1	0.630052	0.418103	0.163925	Plants	-0.211949	True
31060	normal	normal	AMBTC	W1NLW6	U5D2L9	SELML	D8RU29	-1	1	-1	1	1	1	0.630052	0.291432	0.163925	Plants	-0.33862	True
31061	normal	normal	AMBTC	W1NX97	W1NXI5	SELML	D8QPN6	-1	1	1	1	-1	1	0.490548	0.896717	0.324393	Plants	0.406169	True
31061	normal	normal	AMBTC	U5D3H9	W1PEN3	SELML	D8SA15	1	1	1	1	1	1	0.525942	0.375704	0.20689	Plants	-0.150238	True
31062	normal	normal	AMBTC	U5CZG1	W1PT24	SELML	D8SES6	-1	1	-1	1	1	1	0.409073	0.289799	0.211621	Plants	-0.119274	True
31062	normal	normal	AMBTC	W1PKB3	U5D867	SELML	D8RP55					1	1		0.612887	0.476172	Plants		True
31062	normal	normal	AMBTC	W1PBV0	W1NSN8	SELML	D8SC13			-1	1			0.660318		0.112006	Plants		True
31062	normal	normal	AMBTC	W1PBV0	U5D879	SELML	D8SC13	1	1	-1	1	-1	1	0.660318	0.746316	0.112006	Plants	0.0859982	True
31065	normal	normal	AMBTC	W1NZN8	W1PN14	SELML	D8REL4	-1	1	-1	1	1	1	0.378248	0.708413	0.411646	Plants	0.330164	True
31065	normal	normal	AMBTC	U5D0Y4	U5CYP9	SELML	D8R2S4	1	1	1	1	1	1	0.604372	0.992344	0.452141	Plants	0.387972	True
31066	normal	normal	AMBTC	W1NDM6	U5D9K6	SELML	D8TED2	1	1	1	1	1	1	0.403783	0.395876	0.221157	Plants	-0.00790739	True
31066	normal	normal	AMBTC	W1NDM6	W1Q095	SELML	D8TED2	1	1	1	1	1	1	0.403783	0.379117	0.221157	Plants	-0.024666	True
31066	normal	normal	AMBTC	W1NDM6	W1P6D9	SELML	D8TED2	-1	1	1	1	-1	1	0.403783	0.400023	0.221157	Plants	-0.0037604	True
31071	normal	normal	AMBTC	W1PF52	W1PE98	SELML	D8QP54	-1	1	1	1	-1	1	0.407269	0.752427	0.169622	Plants	0.345158	True
31071	normal	normal	AMBTC	W1PF52	W1P1F4	SELML	D8QP54	-1	1	1	1	-1	1	0.407269	0.280208	0.169622	Plants	-0.127061	True
31071	normal	normal	AMBTC	W1PF52	U5DBU2	SELML	D8QP54	-1	1	1	1	-1	1	0.407269	0.252978	0.169622	Plants	-0.154291	True
31072	normal	normal	AMBTC	W1PMY6	U5DA90	SELML	D8RIJ3	1	1	-1	1	-1	1	0.496169	0.480944	0.300021	Plants	-0.0152253	True
31072	normal	normal	AMBTC	W1PMY6	W1PHC6	SELML	D8RIJ3	-1	1	-1	1	1	1	0.496169	0.417484	0.300021	Plants	-0.0786857	True
31072	normal	normal	AMBTC	W1PMY6	W1PF11	SELML	D8RIJ3	-1	1	-1	1	1	1	0.496169	0.526749	0.300021	Plants	0.0305796	True
31079	normal	normal	AMBTC	W1NK30	W1Q0B7	SELML	D8RBR5	1	1	-1	1	-1	1	0.304351	0.570426	0.148856	Plants	0.266075	True
31079	normal	normal	AMBTC	W1NK30	W1PVI8	SELML	D8RBR5	1	1	-1	1	-1	1	0.304351	0.613339	0.148856	Plants	0.308988	True
31083	normal	normal	AMBTC	W1P4F8	W1NGA2	SELML	D8RLW1	-1	1	1	1	-1	1	0.552939	0.575781	0.24755	Plants	0.0228424	True
31083	normal	normal	AMBTC	W1P4F8	U5DG58	SELML	D8RLW1	-1	1	1	1	-1	1	0.552939	0.646032	0.24755	Plants	0.0930931	True
31083	normal	normal	AMBTC	W1P4F8	W1PSP1	SELML	D8RLW1	-1	1	1	1	-1	1	0.552939	0.520656	0.24755	Plants	-0.0322822	True
31086	normal	normal	AMBTC	W1PQ13	U5CS97	SELML	D8SVY6	-1	1	1	1	-1	1	0.526477	0.939329	0.383702	Plants	0.412852	True
31086	normal	normal	AMBTC	W1PQ13	W1PWP4	SELML	D8SVY6	-1	1	1	1	-1	1	0.526477	0.84166	0.383702	Plants	0.315183	True
31086	normal	normal	AMBTC	W1PQ13	W1NZA3	SELML	D8SVY6	-1	1	1	1	-1	1	0.526477	0.286707	0.383702	Plants	-0.23977	True
31086	normal	normal	AMBTC	W1PQ13	U5DFU8	SELML	D8SVY6	-1	1	1	1	-1	1	0.526477	0.931372	0.383702	Plants	0.404895	True
31086	normal	normal	AMBTC	W1PQ13	W1NNR8	SELML	D8SVY6	1	1	1	1	1	1	0.526477	0.846488	0.383702	Plants	0.320011	True
31094	normal	normal	AMBTC	W1PA50	W1NY36	SELML	D8SRX9	1	1	1	1	1	1	0.326391	0.592552	0.20057	Plants	0.266161	True
31096	normal	normal	AMBTC	W1PJ64	W1PZ83	SELML	D8RD92	1	1	1	1	1	1	0.396429	0.397531	0.190705	Plants	0.00110164	True
31096	normal	normal	AMBTC	W1PM10	U5D7Z0	SELML	D8T581	-1	1	-1	1	1	1	0.6347	0.331627	0.112937	Plants	-0.303073	True
31096	normal	normal	AMBTC	U5D8M7	W1PGS6	SELML	D8S6Y8	-1	1	-1	1	1	1	0.387386	0.314399	0.311714	Plants	-0.0729873	True
31096	normal	normal	AMBTC	U5D8M7	W1PZ35	SELML	D8S6Y8	1	1	-1	1	-1	1	0.387386	0.466097	0.311714	Plants	0.0787111	True
31096	normal	normal	AMBTC	W1NU88	W1PHZ0	SELML	D8RTC8	-1	1	-1	1	1	1	0.415421	0.408221	0.153861	Plants	-0.00719969	True
31100	normal	normal	AMBTC	W1NHG0	W1NZ51	SELML	D8REQ3	1	1	1	1	1	1	0.935029	0.547775	0.581755	Plants	-0.387254	True
31100	normal	normal	AMBTC	W1NHG0	W1PYU0	SELML	D8REQ3	1	1	1	1	1	1	0.935029	0.984411	0.581755	Plants	0.0493824	True
31100	normal	normal	AMBTC	W1NHG0	W1PND4	SELML	D8REQ3	1	1	1	1	1	1	0.935029	0.989857	0.581755	Plants	0.0548282	True
31100	normal	normal	AMBTC	W1NHG0	W1NGI5	SELML	D8REQ3	-1	1	1	1	-1	1	0.935029	0.846259	0.581755	Plants	-0.0887701	True
31100	normal	normal	AMBTC	W1NHG0	W1PJV2	SELML	D8REQ3	1	1	1	1	1	1	0.935029	0.693276	0.581755	Plants	-0.241753	True
31110	normal	normal	AMBTC	W1NZ63	U5D0F7	SELML	D8S536	1	1	1	1	1	1	0.406829	0.630541	0.508697	Plants	0.223712	True
31113	normal	normal	AMBTC	W1PZH6	W1PN70	SELML	D8QPH4					1	1	0.879628	0.64727	0.347528	Plants	-0.232358	True
31116	normal	normal	AMBTC	U5DB98	U5D3L2	SELML	D8RNW5	-1	1	-1	1	1	1	0.4257	0.588134	0.115625	Plants	0.162433	True
31116	normal	normal	AMBTC	U5DB98	W1PFC4	SELML	D8RNW5	1	1	-1	1	-1	1	0.4257	0.919184	0.115625	Plants	0.493484	True
31133	normal	normal	AMBTC	W1NMM4	W1PZV0	SELML	D8SV89	-1	1	1	1	-1	1	0.548178	0.310169	0.191863	Plants	-0.238009	True
31133	normal	normal	AMBTC	W1NMM4	U5DCK6	SELML	D8SV89	-1	1	1	1	-1	1	0.548178	0.397687	0.191863	Plants	-0.150491	True
31133	normal	normal	AMBTC	W1NMM4	U5D5H5	SELML	D8SV89	1	1	1	1	1	1	0.548178	0.556257	0.191863	Plants	0.0080788	True
31140	normal	normal	AMBTC	W1PBW2	W1PQ79	SELML	D8S6Z7	-1	1	-1	1	1	1	0.53149	0.91779	0.239677	Plants	0.3863	True
31140	normal	normal	AMBTC	W1PBW2	W1NPW3	SELML	D8S6Z7	-1	1	-1	1	1	1	0.53149	0.647407	0.239677	Plants	0.115917	True
31140	normal	normal	AMBTC	W1PU77	W1PMU7	SELML	D8TDC9	-1	1	1	1	-1	1	0.824996	0.797489	0.0992525	Plants	-0.0275071	True
31142	normal	normal	AMBTC	W1PNA7	U5D1W7	SELML	D8RBN4	1	1	1	1	1	1	0.186698	0.315018	0.101245	Plants	0.128321	True
31142	normal	normal	AMBTC	W1PNA7	U5CNB6	SELML	D8RBN4	1	1	1	1	1	1	0.186698	0.463125	0.101245	Plants	0.276427	True
31149	normal	normal	AMBTC	W1NZQ5	W1PG81	SELML	D8S8W0	-1	1	1	1	-1	1	0.347565	0.322112	0.0670146	Plants	-0.025453	True
31155	normal	normal	AMBTC	W1NK73	W1NL09	SELML	D8RGS6	-1	1	-1	1	1	1	0.438316	0.855771	0.0738919	Plants	0.417456	True
31161	normal	normal	AMBTC	W1PCN2	W1NYD5	SELML	D8QWX9	1	1	-1	1	-1	1	0.369386	0.325388	0.192794	Plants	-0.0439975	True
31165	normal	normal	AMBTC	W1PI26	W1PLR2	SELML	D8RRH9	1	1	1	1	1	1	0.778843	0.688767	0.0669577	Plants	-0.0900758	True
31182	normal	normal	AMBTC	W1NE86	W1NJ13	SELML	D8RAD8	1	1	-1	1	-1	1	0.293666	0.949229	0.15445	Plants	0.655563	True
31189	normal	normal	AMBTC	W1PB84	U5D527	SELML	D8RJI5	1	1	-1	1	-1	1	0.721768	0.963386	0.98418	Plants	0.241619	True
31189	normal	normal	AMBTC	W1PB84	W1P1Y4	SELML	D8RJI5	1	1	-1	1	-1	1	0.721768	0.986658	0.98418	Plants	0.26489	True
31190	normal	normal	AMBTC	W1PLT9	W1PGB8	SELML	D8T3I2	1	1	1	1	1	1	0.735595	0.592337	0.797421	Plants	-0.143258	True
31190	normal	normal	AMBTC	W1PLT9	W1NF53	SELML	D8T3I2	1	1	1	1	1	1	0.735595	0.817151	0.797421	Plants	0.0815561	True
31194	normal	normal	AMBTC	W1PHA6	W1PWZ2	SELML	D8SPG7	-1	1	-1	1	1	1	0.789476	0.671931	0.30475	Plants	-0.117544	True
31194	normal	normal	AMBTC	W1PHA6	W1PES3	SELML	D8SPG7	1	1	-1	1	-1	1	0.789476	0.640563	0.30475	Plants	-0.148913	True
31194	normal	normal	AMBTC	U5D480	W1PE40	SELML	D8RVK1	1	1	1	1	1	1	0.831174	0.824228	0.553301	Plants	-0.00694604	True
31197	normal	normal	AMBTC	W1P964	W1NJC5	SELML	D8SCE7	1	1	-1	1	-1	1	0.525505	0.333236	0.151292	Plants	-0.192269	True
31197	normal	normal	AMBTC	W1P964	W1NR99	SELML	D8SCE7	1	1	-1	1	-1	1	0.525505	0.345803	0.151292	Plants	-0.179701	True
31197	normal	normal	AMBTC	W1P964	U5D0D1	SELML	D8SCE7	1	1	-1	1	-1	1	0.525505	0.278904	0.151292	Plants	-0.246601	True
31208	normal	normal	AMBTC	U5DA14	U5D7D3	SELML	D8R2Z6	-1	1	1	1	-1	1	0.481923	0.440511	0.259797	Plants	-0.041412	True
31210	normal	normal	AMBTC	W1PR80	W1PQP0	SELML	D8RL43	-1	1	1	1	-1	1	0.340553	0.444987	0.0654625	Plants	0.104433	True
31210	normal	normal	AMBTC	W1PL16	W1Q0C9	SELML	D8R5G4	1	1	1	1	1	1	0.409851	0.253377	0.072397	Plants	-0.156474	True
31213	normal	normal	AMBTC	W1NK26	U5CQ23	SELML	D8SRM9	-1	1	-1	1	1	1	0.472321	0.731097	0.214249	Plants	0.258776	True
31213	normal	normal	AMBTC	W1NK26	W1NYB1	SELML	D8SRM9	1	1	-1	1	-1	1	0.472321	0.794511	0.214249	Plants	0.32219	True
31213	normal	normal	AMBTC	W1P051	U5CZ99	SELML	D8SJ13	1	1	1	1	1	1	0.469419	0.953463	0.453565	Plants	0.484045	True
31215	normal	normal	AMBTC	W1NV88	W1NWJ1	SELML	D8RCE8	1	1	1	1	1	1	0.226641	0.303304	0.10352	Plants	0.0766633	True
31218	normal	normal	AMBTC	W1NR97	W1PZF3	SELML	D8RTP2	1	1	-1	1	-1	1	0.641792	0.868321	0.100991	Plants	0.226529	True
31218	normal	normal	AMBTC	W1P774	W1PKA8	SELML	D8R5H5	-1	1					0.700472	0.856329		Plants	0.155857	True
31218	normal	normal	AMBTC	W1P774	W1PGS9	SELML	D8R5H5	-1	1					0.700472	0.840098		Plants	0.139626	True
31218	normal	normal	AMBTC	W1P774	W1PXJ0	SELML	D8R5H5	1	1					0.700472	0.699788		Plants	-0.000684815	True
31218	normal	normal	AMBTC	W1P774	W1PJJ1	SELML	D8R5H5	-1	1					0.700472	0.837013		Plants	0.136541	True
31218	normal	normal	AMBTC	W1P774	W1NGJ6	SELML	D8R5H5							0.700472			Plants		True
31221	normal	normal	AMBTC	W1P6L2	W1PLB8	SELML	D8RMJ9	-1	1	-1	1	1	1	0.562497	0.681352	0.51704	Plants	0.118855	True
31221	normal	normal	AMBTC	W1P6L2	W1P8E8	SELML	D8RMJ9	1	1	-1	1	-1	1	0.562497	0.727804	0.51704	Plants	0.165307	True
31221	normal	normal	AMBTC	W1P6L2	W1P843	SELML	D8RMJ9	-1	1	-1	1	1	1	0.562497	0.80657	0.51704	Plants	0.244073	True
31221	normal	normal	AMBTC	W1NWG1	W1PFV6	SELML	D8S6Z9	-1	1	1	1	-1	1	0.25518	0.479092	0.119594	Plants	0.223912	True
31223	normal	normal	AMBTC	U5D1R7	W1NTM3	SELML	D8R6X0	1	1	-1	1	-1	1	0.497084	0.878203	0.0542512	Plants	0.381118	True
31223	normal	normal	AMBTC	U5D1R7	W1NKQ6	SELML	D8R6X0	-1	1	-1	1	1	1	0.497084	0.792333	0.0542512	Plants	0.295249	True
31223	normal	normal	AMBTC	U5D1R7	U5D1Q1	SELML	D8R6X0	1	1	-1	1	-1	1	0.497084	0.840511	0.0542512	Plants	0.343426	True
31223	normal	normal	AMBTC	U5D1R7	W1PK48	SELML	D8R6X0	-1	1	-1	1	1	1	0.497084	0.722241	0.0542512	Plants	0.225157	True
31235	normal	normal	AMBTC	W1P057	U5CVE0	SELML	D8RYY1					1	1		0.919299	0.334928	Plants		True
31235	normal	normal	AMBTC	W1P057	W1PM24	SELML	D8RYY1					1	1		0.640257	0.334928	Plants		True
31235	normal	normal	AMBTC	W1PK41	W1P4U0	SELML	D8SWR7	-1	1	1	1	-1	1	0.641729	0.390009	0.680464	Plants	-0.25172	True
31235	normal	normal	AMBTC	W1PK41	W1NS00	SELML	D8SWR7	1	1	1	1	1	1	0.641729	0.618938	0.680464	Plants	-0.0227908	True
31235	normal	normal	AMBTC	W1PK41	W1NWF5	SELML	D8SWR7	-1	1	1	1	-1	1	0.641729	0.876162	0.680464	Plants	0.234433	True
31235	normal	normal	AMBTC	W1NFG4	U5DBK8	SELML	D8SLU7	-1	1	1	1	-1	1	0.587054	0.878365	0.548512	Plants	0.291311	True
31235	normal	normal	AMBTC	W1NFG4	W1PZW6	SELML	D8SLU7	1	1	1	1	1	1	0.587054	0.87092	0.548512	Plants	0.283866	True
31235	normal	normal	AMBTC	U5D338	W1NJS8	SELML	D8RAJ2	1	1	1	1	1	1	0.998399	0.913446	0.522558	Plants	-0.0849529	True
31235	normal	normal	AMBTC	W1PEJ5	W1NR85	SELML	D8QRG8			1	1			0.750872		0.436437	Plants		True
31235	normal	normal	AMBTC	U5D4B8	U5D4Z6	SELML	D8TBP8	-1	1	-1	1	1	1	0.88771	0.56519	0.590485	Plants	-0.32252	True
31235	normal	normal	AMBTC	U5D4B8	W1NG03	SELML	D8TBP8	-1	1	-1	1	1	1	0.88771	0.633873	0.590485	Plants	-0.253837	True
31235	normal	normal	AMBTC	U5D4B8	U5DA97	SELML	D8TBP8	-1	1	-1	1	1	1	0.88771	0.804022	0.590485	Plants	-0.0836885	True
31236	normal	normal	AMBTC	W1NPF2	U5DAV9	SELML	D8QS45	-1	1	1	1	-1	1	0.587577	0.809541	0.99444	Plants	0.221964	True
31238	normal	normal	AMBTC	W1P546	W1P2R3	SELML	D8T1V7	1	1	-1	1	-1	1	0.392376	0.609763	0.778657	Plants	0.217387	True
31238	normal	normal	AMBTC	W1P546	W1PU87	SELML	D8T1V7	-1	1	-1	1	1	1	0.392376	0.522679	0.778657	Plants	0.130303	True
31238	normal	normal	AMBTC	W1P546	W1NTP7	SELML	D8T1V7	1	1	-1	1	-1	1	0.392376	0.72628	0.778657	Plants	0.333904	True
31238	normal	normal	AMBTC	W1P546	W1NQ42	SELML	D8T1V7	1	1	-1	1	-1	1	0.392376	0.712986	0.778657	Plants	0.32061	True
31238	normal	normal	AMBTC	W1P546	W1P4I7	SELML	D8T1V7	1	1	-1	1	-1	1	0.392376	0.782041	0.778657	Plants	0.389665	True
31246	normal	normal	AMBTC	W1NK95	U5D677	SELML	D8QTJ3	1	1	-1	1	-1	1	0.486716	0.515168	0.0561541	Plants	0.0284523	True
31246	normal	normal	AMBTC	W1NK95	W1P540	SELML	D8QTJ3	1	1	-1	1	-1	1	0.486716	0.669909	0.0561541	Plants	0.183193	True
31262	normal	normal	AMBTC	U5D6Q1	W1P273	SELML	D8T5P3	-1	1	1	1	-1	1	0.5395	0.492101	0.583506	Plants	-0.0473988	True
31268	normal	normal	AMBTC	U5D9E1	W1PR43	SELML	D8R1J3	1	1	1	1	1	1	0.67669	0.456887	0.21448	Plants	-0.219803	True
31268	normal	normal	AMBTC	U5D9E1	U5D974	SELML	D8R1J3	1	1	1	1	1	1	0.67669	0.195092	0.21448	Plants	-0.481598	True
31268	normal	normal	AMBTC	U5D9E1	U5DFC2	SELML	D8R1J3	1	1	1	1	1	1	0.67669	0.463645	0.21448	Plants	-0.213044	True
31268	normal	normal	AMBTC	U5D9E1	W1P015	SELML	D8R1J3	1	1	1	1	1	1	0.67669	0.366625	0.21448	Plants	-0.310065	True
31269	normal	normal	AMBTC	W1PAE3	U5DDI9	SELML	D8SMW1	-1	1	1	1	-1	1	0.641317	0.936557	0.365247	Plants	0.29524	True
31269	normal	normal	AMBTC	W1PAE3	W1PM52	SELML	D8SMW1	1	1	1	1	1	1	0.641317	0.971158	0.365247	Plants	0.329841	True
31279	normal	normal	AMBTC	U5CV42	U5DFT3	SELML	D8SX21	1	1	-1	1	-1	1	0.636798	0.588498	0.359291	Plants	-0.0483003	True
31279	normal	normal	AMBTC	U5CV42	U5CY35	SELML	D8SX21	1	1	-1	1	-1	1	0.636798	0.836627	0.359291	Plants	0.199829	True
31279	normal	normal	AMBTC	W1P0I2	U5CNK9	SELML	D8R890	-1	1	1	1	-1	1	0.803424	0.523506	0.346745	Plants	-0.279918	True
31279	normal	normal	AMBTC	W1P0I2	U5CX60	SELML	D8R890	1	1	1	1	1	1	0.803424	0.345784	0.346745	Plants	-0.45764	True
31280	normal	normal	AMBTC	U5CY56	U5CZZ6	SELML	D8RVQ0	-1	1	-1	1	1	1	0.398047	0.628283	0.107478	Plants	0.230236	True
31280	normal	normal	AMBTC	W1NQP2	U5DD15	SELML	D8SDK3	1	1	-1	1	-1	1	0.523789	0.450181	0.124234	Plants	-0.0736078	True
31282	normal	normal	AMBTC	W1P185	W1PIH4	SELML	D8S567	1	1	1	1	1	1	0.346049	0.352792	0.106378	Plants	0.00674329	True
31282	normal	normal	AMBTC	W1P185	W1NWV3	SELML	D8S567	-1	1	1	1	-1	1	0.346049	0.386141	0.106378	Plants	0.040092	True
31284	normal	normal	AMBTC	U5D1D1	W1PPP2	SELML	D8QQ46	1	1	1	1	1	1	0.233615	0.456528	0.0591488	Plants	0.222914	True
31284	normal	normal	AMBTC	U5D1D1	U5D026	SELML	D8QQ46	-1	1	1	1	-1	1	0.233615	0.66611	0.0591488	Plants	0.432496	True
31288	normal	normal	AMBTC	W1P7L8	W1PF91	SELML	D8RMR6	1	1	-1	1	-1	1	0.474811	0.685616	0.201686	Plants	0.210805	True
31288	normal	normal	AMBTC	W1P7L8	W1NF37	SELML	D8RMR6	1	1	-1	1	-1	1	0.474811	0.338565	0.201686	Plants	-0.136246	True
31300	normal	normal	AMBTC	W1NLG2	U5D0K5	SELML	D8SS63	1	1	-1	1	-1	1	0.398614	0.536467	0.305745	Plants	0.137853	True
31300	normal	normal	AMBTC	W1NLG2	W1P953	SELML	D8SS63	1	1	-1	1	-1	1	0.398614	0.761499	0.305745	Plants	0.362884	True
31301	normal	normal	AMBTC	W1P0T5	U5D4K3	SELML	D8R2Q3			1	1			0.621055		0.31987	Plants		True
31301	normal	normal	AMBTC	W1P0T5	W1Q0F6	SELML	D8R2Q3			1	1			0.621055	0.992299	0.31987	Plants	0.371244	True
31301	normal	normal	AMBTC	W1PAS4	W1PBG5	SELML	D8SN28	-1	1	-1	1	1	1	0.824278	0.691203	0.814303	Plants	-0.133075	True
31304	normal	normal	AMBTC	W1NDW0	W1P7Q5	SELML	D8SB10	1	1	1	1	1	1	0.426914	0.362097	0.458797	Plants	-0.0648174	True
31307	normal	normal	AMBTC	W1NJ44	W1PHW1	SELML	D8RR12	1	1	-1	1	-1	1	0.350329	0.402947	0.0735873	Plants	0.0526176	True
31307	normal	normal	AMBTC	W1NJ44	U5CST7	SELML	D8RR12	1	1	-1	1	-1	1	0.350329	0.549319	0.0735873	Plants	0.19899	True
31307	normal	normal	AMBTC	W1PC73	W1P821	SELML	D8QRJ4	1	1	-1	1	-1	1	0.401897	0.24715	0.136315	Plants	-0.154747	True
31307	normal	normal	AMBTC	W1PC73	W1P6L6	SELML	D8QRJ4	1	1	-1	1	-1	1	0.401897	0.416277	0.136315	Plants	0.0143802	True
31311	normal	normal	AMBTC	W1P765	U5D808	SELML	D8R9M0	1	1	1	1	1	1	0.245602	0.524955	0.223811	Plants	0.279353	True
31314	normal	normal	AMBTC	W1PWA8	W1P826	SELML	D8RWH6	-1	1	-1	1	1	1	0.843458	0.25201	0.438967	Plants	-0.591449	True
31314	normal	normal	AMBTC	U5DF83	W1PYK6	SELML	D8RS23	1	1	-1	1	-1	1	0.363004	0.404311	0.0946837	Plants	0.0413064	True
31314	normal	normal	AMBTC	U5DF83	W1NQQ4	SELML	D8RS23	-1	1	-1	1	1	1	0.363004	0.412879	0.0946837	Plants	0.0498747	True
31321	normal	normal	AMBTC	W1PLH3	W1PTF6	SELML	D8R1X3	-1	1	1	1	-1	1	0.806592	0.816229	0.298077	Plants	0.0096365	True
31326	normal	normal	AMBTC	U5D1W5	U5D886	SELML	D8STX4	-1	1	-1	1	1	1	0.572802	0.40237	0.402726	Plants	-0.170432	True
31339	normal	normal	AMBTC	W1P376	W1P040	SELML	D8R857	1	1	1	1	1	1	0.590908	0.543091	0.104359	Plants	-0.0478176	True
31339	normal	normal	AMBTC	W1P376	W1NMG2	SELML	D8R857	1	1	1	1	1	1	0.590908	0.352603	0.104359	Plants	-0.238306	True
31339	normal	normal	AMBTC	W1P376	W1P804	SELML	D8R857	1	1	1	1	1	1	0.590908	0.677607	0.104359	Plants	0.086699	True
31339	normal	normal	AMBTC	W1P376	W1NXD6	SELML	D8R857	1	1	1	1	1	1	0.590908	0.371488	0.104359	Plants	-0.219421	True
31342	normal	normal	AMBTC	W1P9S3	W1PIW2	SELML	D8QV00	-1	1	1	1	-1	1	0.560743	0.830799	0.30371	Plants	0.270056	True
31342	normal	normal	AMBTC	W1P9S3	W1P4Y9	SELML	D8QV00	-1	1	1	1	-1	1	0.560743	0.441484	0.30371	Plants	-0.11926	True
31342	normal	normal	AMBTC	W1P9S3	W1Q0B2	SELML	D8QV00	-1	1	1	1	-1	1	0.560743	0.694904	0.30371	Plants	0.134161	True
31343	normal	normal	AMBTC	U5CU42	W1PJR4	SELML	D8RKR5	1	1	-1	1	-1	1	0.322999	0.394878	0.356184	Plants	0.0718792	True
31351	normal	normal	AMBTC	W1NU10	W1P3J2	SELML	D8S512	-1	1	-1	1	1	1	0.675902	0.519624	0.184379	Plants	-0.156279	True
31352	normal	normal	AMBTC	W1NHS0	W1NG79	SELML	D8SVN8	1	1	1	1	1	1	0.453394	0.231862	0.126897	Plants	-0.221532	True
31352	normal	normal	AMBTC	W1PSB5	W1PHK7	SELML	D8RCV1	1	1	1	1	1	1	0.35656	0.300331	0.341809	Plants	-0.0562287	True
31354	normal	normal	AMBTC	U5DDY0	U5D7C0	SELML	D8ST94	1	1	1	1	1	1	0.326201	0.300683	0.202275	Plants	-0.0255187	True
31355	normal	normal	AMBTC	U5DBK9	W1PWL8	SELML	D8RNY3	1	1	1	1	1	1	0.458122	0.704512	0.136509	Plants	0.246389	True
31355	normal	normal	AMBTC	U5DBK9	W1NPJ0	SELML	D8RNY3	1	1	1	1	1	1	0.458122	0.34114	0.136509	Plants	-0.116983	True
31358	normal	normal	AMBTC	W1NDJ9	W1P7U8	SELML	D8QMK7	-1	1	1	1	-1	1	0.207999	0.221503	0.102278	Plants	0.0135042	True
31371	normal	normal	AMBTC	W1Q026	W1Q067	SELML	D8RL03	-1	1	1	1	-1	1	0.458939	0.616946	0.140142	Plants	0.158008	True
31371	normal	normal	AMBTC	W1Q026	W1NGL1	SELML	D8RL03	-1	1	1	1	-1	1	0.458939	0.600176	0.140142	Plants	0.141237	True
31374	normal	normal	AMBTC	W1PEP8	U5D322	SELML	D8QXW3	1	1	-1	1	-1	1	0.535084	0.733807	0.228535	Plants	0.198723	True
31374	normal	normal	AMBTC	W1P6K7	W1P907	SELML	D8SQH1	1	1	1	1	1	1	0.678453	0.658456	0.202686	Plants	-0.0199972	True
31374	normal	normal	AMBTC	W1P6K7	W1PL92	SELML	D8SQH1	-1	1	1	1	-1	1	0.678453	0.315764	0.202686	Plants	-0.362689	True
31374	normal	normal	AMBTC	W1P6K7	W1PY81	SELML	D8SQH1	1	1	1	1	1	1	0.678453	0.883093	0.202686	Plants	0.20464	True
31374	normal	normal	AMBTC	W1P6K7	U5D2K9	SELML	D8SQH1			1	1			0.678453		0.202686	Plants		True
31374	normal	normal	AMBTC	W1P6K7	W1PK62	SELML	D8SQH1	-1	1	1	1	-1	1	0.678453	0.737193	0.202686	Plants	0.0587401	True
31374	normal	normal	AMBTC	W1P6K7	W1PAN3	SELML	D8SQH1	1	1	1	1	1	1	0.678453	0.945375	0.202686	Plants	0.266922	True
31374	normal	normal	AMBTC	W1P6K7	W1PX58	SELML	D8SQH1	1	1	1	1	1	1	0.678453	0.509607	0.202686	Plants	-0.168846	True
31374	normal	normal	AMBTC	W1P6K7	W1NJN5	SELML	D8SQH1	-1	1	1	1	-1	1	0.678453	0.620781	0.202686	Plants	-0.0576718	True
31374	normal	normal	AMBTC	W1P6K7	W1PXM7	SELML	D8SQH1	1	1	1	1	1	1	0.678453	0.873325	0.202686	Plants	0.194872	True
31374	normal	normal	AMBTC	W1P6K7	W1NIU5	SELML	D8SQH1	1	1	1	1	1	1	0.678453	0.683339	0.202686	Plants	0.00488622	True
31374	normal	normal	AMBTC	W1P6K7	W1PLI9	SELML	D8SQH1	-1	1	1	1	-1	1	0.678453	0.911068	0.202686	Plants	0.232615	True
31374	normal	normal	AMBTC	W1P6K7	W1NMB2	SELML	D8SQH1	-1	1	1	1	-1	1	0.678453	0.964935	0.202686	Plants	0.286482	True
31374	normal	normal	AMBTC	W1P6K7	W1PN65	SELML	D8SQH1	1	1	1	1	1	1	0.678453	0.695703	0.202686	Plants	0.0172499	True
31375	normal	normal	AMBTC	W1P399	W1NJ36	SELML	D8SFZ6			-1	1			0.656049	0.958509	0.201692	Plants	0.30246	True
31375	normal	normal	AMBTC	W1PB54	U5DBB6	SELML	D8S296	1	1	1	1	1	1	0.928389	0.744535	0.1056	Plants	-0.183853	True
31375	normal	normal	AMBTC	W1PB54	W1NXF1	SELML	D8S296	1	1	1	1	1	1	0.928389	0.765213	0.1056	Plants	-0.163176	True
31375	normal	normal	AMBTC	W1NTK6	W1PA92	SELML	D8RB42	-1	1	1	1	-1	1	0.794811	0.536905	0.37346	Plants	-0.257906	True
31375	normal	normal	AMBTC	W1P6H0	W1P6Q5	SELML	D8SAJ1	-1	1	1	1	-1	1	0.80346	0.925672	0.745131	Plants	0.122212	True
31375	normal	normal	AMBTC	W1P6H0	W1P5S7	SELML	D8SAJ1	1	1	1	1	1	1	0.80346	0.86336	0.745131	Plants	0.0599007	True
31375	normal	normal	AMBTC	W1P6H0	W1NYN0	SELML	D8SAJ1	1	1	1	1	1	1	0.80346	0.947514	0.745131	Plants	0.144054	True
31376	normal	normal	AMBTC	W1P5H8	U5DEA8	SELML	D8RRV4	1	1	1	1	1	1	0.581106	0.801155	0.160665	Plants	0.220049	True
31376	normal	normal	AMBTC	W1P5H8	W1P235	SELML	D8RRV4	-1	1	1	1	-1	1	0.581106	0.412851	0.160665	Plants	-0.168255	True
31384	normal	normal	AMBTC	E0WD85	W1PR70	SELML	D8T5N9	1	1	-1	1	-1	1	0.50334	0.298597	0.132058	Plants	-0.204743	True
31384	normal	normal	AMBTC	E0WD85	W1PD69	SELML	D8T5N9	-1	1	-1	1	1	1	0.50334	0.508829	0.132058	Plants	0.00548872	True
31384	normal	normal	AMBTC	E0WD85	W1P5U2	SELML	D8T5N9	1	1	-1	1	-1	1	0.50334	0.60157	0.132058	Plants	0.0982304	True
31384	normal	normal	AMBTC	W1PGL1	W1Q0R4	SELML	D8R1E2	-1	1	1	1	-1	1	0.429871	0.44011	0.253725	Plants	0.0102396	True
31384	normal	normal	AMBTC	W1PGL1	W1PQ90	SELML	D8R1E2	-1	1	1	1	-1	1	0.429871	0.441283	0.253725	Plants	0.011412	True
31384	normal	normal	AMBTC	W1PGL1	W1Q0G9	SELML	D8R1E2	1	1	1	1	1	1	0.429871	0.5407	0.253725	Plants	0.110829	True
31388	normal	normal	AMBTC	W1PCI2	W1PQY3	SELML	D8T986	1	1	-1	1	-1	1	0.652364	0.939201	0.979411	Plants	0.286837	True
31388	normal	normal	AMBTC	W1PCI2	W1PQV4	SELML	D8T986	1	1	-1	1	-1	1	0.652364	0.731091	0.979411	Plants	0.0787268	True
31388	normal	normal	AMBTC	W1PCI2	W1PIZ0	SELML	D8T986	-1	1	-1	1	1	1	0.652364	0.760303	0.979411	Plants	0.107939	True
31388	normal	normal	AMBTC	W1PCI2	W1NTC5	SELML	D8T986	1	1	-1	1	-1	1	0.652364	0.701898	0.979411	Plants	0.0495341	True
31388	normal	normal	AMBTC	W1PCI2	W1PNE7	SELML	D8T986	-1	1	-1	1	1	1	0.652364	0.863651	0.979411	Plants	0.211287	True
31388	normal	normal	AMBTC	W1P4L3	W1P4E1	SELML	D8SWQ9	1	1	-1	1	-1	1	0.612259	0.832076	0.158012	Plants	0.219816	True
31388	normal	normal	AMBTC	W1P4L3	W1PFK0	SELML	D8SWQ9	1	1	-1	1	-1	1	0.612259	0.849678	0.158012	Plants	0.237419	True
31388	normal	normal	AMBTC	W1P4L3	W1PM70	SELML	D8SWQ9	-1	1	-1	1	1	1	0.612259	0.657524	0.158012	Plants	0.0452646	True
31388	normal	normal	AMBTC	W1P4L3	W1PAP3	SELML	D8SWQ9	1	1	-1	1	-1	1	0.612259	0.779946	0.158012	Plants	0.167687	True
31391	normal	normal	AMBTC	U5D833	W1P328	SELML	D8SQV9	1	1	-1	1	-1	1	0.760275	0.6169	0.286434	Plants	-0.143375	True
31403	normal	normal	AMBTC	W1PZS1	U5CN45	SELML	D8R9D6	1	1					0.911261	0.710172		Plants	-0.201089	True
31403	normal	normal	AMBTC	W1PZS1	W1NZX9	SELML	D8R9D6	-1	1					0.911261	0.910501		Plants	-0.000759514	True
31403	normal	normal	AMBTC	W1PZS1	W1NG93	SELML	D8R9D6	1	1					0.911261	0.921899		Plants	0.0106384	True
31403	normal	normal	AMBTC	W1PZS1	W1NX72	SELML	D8R9D6	-1	1					0.911261	0.571609		Plants	-0.339652	True
31403	normal	normal	AMBTC	W1PZS1	U5D2J4	SELML	D8R9D6	1	1					0.911261	0.605789		Plants	-0.305471	True
31407	normal	normal	AMBTC	W1P7U3	W1PE13	SELML	D8R781	1	1	1	1	1	1	0.472974	0.651351	0.337765	Plants	0.178377	True
31413	normal	normal	AMBTC	U5CYQ2	W1PQT2	SELML	D8QQ52	1	1	-1	1	-1	1	0.256367	0.243021	0.107863	Plants	-0.0133465	True
31414	normal	normal	AMBTC	U5CVX0	W1NZD3	SELML	D8RM65	1	1	1	1	1	1	0.21714	0.497048	0.206249	Plants	0.279907	True
31425	normal	normal	AMBTC	W1PWE5	W1NDX5	SELML	D8SSQ2	1	1	-1	1	-1	1	0.399798	0.815658	0.037022	Plants	0.415859	True
31425	normal	normal	AMBTC	W1PWE5	W1PS85	SELML	D8SSQ2	1	1	-1	1	-1	1	0.399798	0.708208	0.037022	Plants	0.30841	True
31425	normal	normal	AMBTC	W1PWE5	W1P1T3	SELML	D8SSQ2	1	1	-1	1	-1	1	0.399798	0.711032	0.037022	Plants	0.311234	True
31425	normal	normal	AMBTC	W1PWE5	W1PVF6	SELML	D8SSQ2	1	1	-1	1	-1	1	0.399798	0.683707	0.037022	Plants	0.283909	True
31425	normal	normal	AMBTC	W1PWE5	W1NH13	SELML	D8SSQ2	-1	1	-1	1	1	1	0.399798	0.428464	0.037022	Plants	0.0286656	True
31444	normal	normal	AMBTC	W1PPC6	U5D2M8	SELML	D8S5Z6	1	1	1	1	1	1	0.5075	0.381322	0.356047	Plants	-0.126177	True
31444	normal	normal	AMBTC	W1PPC6	W1PRN4	SELML	D8S5Z6	1	1	1	1	1	1	0.5075	0.642743	0.356047	Plants	0.135244	True
31444	normal	normal	AMBTC	W1PPC6	W1NRN1	SELML	D8S5Z6	1	1	1	1	1	1	0.5075	0.775743	0.356047	Plants	0.268243	True
31447	normal	normal	AMBTC	W1NTV6	W1PKR6	SELML	D8RIS3	-1	1	1	1	-1	1	0.60045	0.279665	0.186984	Plants	-0.320785	True
31448	normal	normal	AMBTC	W1PAV3	W1P0C1	SELML	D8R124	-1	1	-1	1	1	1	0.473621	0.401698	0.137404	Plants	-0.0719225	True
31448	normal	normal	AMBTC	W1PAV3	W1NJX3	SELML	D8R124	1	1	-1	1	-1	1	0.473621	0.670595	0.137404	Plants	0.196974	True
31451	normal	normal	AMBTC	W1NGP9	W1NYE8	SELML	D8SIY9	1	1	1	1	1	1	0.703012	0.938312	0.424073	Plants	0.2353	True
31451	normal	normal	AMBTC	W1NGP9	W1P6D4	SELML	D8SIY9	1	1	1	1	1	1	0.703012	0.596985	0.424073	Plants	-0.106027	True
31451	normal	normal	AMBTC	U5D4H7	W1P9F8	SELML	D8RTF2	1	1	-1	1	-1	1	0.625512	0.780525	0.34929	Plants	0.155013	True
31451	normal	normal	AMBTC	U5D4H7	W1P404	SELML	D8RTF2	1	1	-1	1	-1	1	0.625512	0.315534	0.34929	Plants	-0.309977	True
31469	normal	normal	AMBTC	U5DG53	U5DCQ3	SELML	D8RYJ7	1	1	-1	1	-1	1	0.310672	0.386255	0.140285	Plants	0.0755822	True
31471	normal	normal	AMBTC	W1PP16	W1NLE8	SELML	D8RQA1	1	1	-1	1	-1	1	0.464	0.668664	0.343658	Plants	0.204664	True
31471	normal	normal	AMBTC	W1PP16	W1NDM8	SELML	D8RQA1	1	1	-1	1	-1	1	0.464	0.46722	0.343658	Plants	0.00321941	True
31471	normal	normal	AMBTC	W1PP16	W1PZ65	SELML	D8RQA1	1	1	-1	1	-1	1	0.464	0.651996	0.343658	Plants	0.187995	True
31476	normal	normal	AMBTC	U5CNT3	U5D9Z9	SELML	D8QSW7	-1	1	1	1	-1	1	0.441707	0.518813	0.171184	Plants	0.0771058	True
31476	normal	normal	AMBTC	U5CNT3	U5D7K2	SELML	D8QSW7	1	1	1	1	1	1	0.441707	0.506317	0.171184	Plants	0.0646098	True
31479	normal	normal	AMBTC	W1Q071	W1PM07	SELML	D8S0T2	-1	1	1	1	-1	1	0.515365	0.653954	0.0919201	Plants	0.13859	True
31480	normal	normal	AMBTC	U5D4C4	U5CXY5	SELML	D8SCQ1	1	1	1	1	1	1	0.561423	0.618058	0.315861	Plants	0.0566348	True
31490	normal	normal	AMBTC	W1P5B8	W1PTL9	SELML	D8T174	1	1	1	1	1	1	0.928153	0.718723	0.307857	Plants	-0.20943	True
31495	normal	normal	AMBTC	W1PLQ7	W1NF78	SELML	D8R120	-1	1	-1	1	1	1	0.787885	0.346131	0.595317	Plants	-0.441754	True
31499	normal	normal	AMBTC	W1PQZ0	W1NNF9	SELML	D8S325	-1	1	1	1	-1	1	0.534943	0.75101	0.593753	Plants	0.216067	True
31499	normal	normal	AMBTC	W1PQZ0	U5D2K7	SELML	D8S325	-1	1	1	1	-1	1	0.534943	0.633403	0.593753	Plants	0.09846	True
31499	normal	normal	AMBTC	W1PQZ0	W1NR55	SELML	D8S325	-1	1	1	1	-1	1	0.534943	0.697188	0.593753	Plants	0.162245	True
31499	normal	normal	AMBTC	W1PQZ0	W1P4D7	SELML	D8S325	-1	1	1	1	-1	1	0.534943	0.323899	0.593753	Plants	-0.211044	True
31500	normal	normal	AMBTC	W1PND8	W1NHY4	SELML	D8RSA2	-1	1	-1	1	1	1	0.295476	0.512924	0.31369	Plants	0.217448	True
31500	normal	normal	AMBTC	W1PND8	W1PYV2	SELML	D8RSA2	1	1	-1	1	-1	1	0.295476	0.690651	0.31369	Plants	0.395174	True
31500	normal	normal	AMBTC	W1PND8	W1PYY9	SELML	D8RSA2	1	1	-1	1	-1	1	0.295476	0.482279	0.31369	Plants	0.186803	True
31503	normal	normal	AMBTC	W1NVX3	W1PQ12	SELML	D8R2N6	1	1	1	1	1	1	0.385382	0.525985	0.0853284	Plants	0.140603	True
31517	normal	normal	AMBTC	W1PNS7	W1NWE4	SELML	D8RZ04	1	1	-1	1	-1	1	0.540879	0.503043	0.232604	Plants	-0.037836	True
31558	normal	normal	AMBTC	W1P3I9	W1P9D7	SELML	D8RTE0	1	1	1	1	1	1	0.261437	0.542447	0.0879974	Plants	0.28101	True
31561	normal	normal	AMBTC	W1PPS1	W1PKJ2	SELML	D8S354	1	1	-1	1	-1	1	0.407385	0.452885	0.222187	Plants	0.0455	True
31561	normal	normal	AMBTC	W1PPS1	U5DB50	SELML	D8S354	-1	1	-1	1	1	1	0.407385	0.862703	0.222187	Plants	0.455318	True
31561	normal	normal	AMBTC	W1PPS1	W1PC94	SELML	D8S354	-1	1	-1	1	1	1	0.407385	0.411558	0.222187	Plants	0.0041724	True
31561	normal	normal	AMBTC	W1PPS1	W1NZA4	SELML	D8S354	-1	1	-1	1	1	1	0.407385	0.696764	0.222187	Plants	0.289378	True
31561	normal	normal	AMBTC	W1PPS1	W1NMK7	SELML	D8S354			-1	1			0.407385	0.951407	0.222187	Plants	0.544022	True
31561	normal	normal	AMBTC	W1P1D9	W1P854	SELML	D8QPW1	1	1	1	1	1	1	0.695915	0.653024	0.152175	Plants	-0.0428904	True
31561	normal	normal	AMBTC	W1P1D9	U5D7P8	SELML	D8QPW1	-1	1	1	1	-1	1	0.695915	0.396436	0.152175	Plants	-0.299479	True
31563	normal	normal	AMBTC	W1PF26	U5D3R9	SELML	D8SG28	1	1	1	1	1	1	0.452227	0.381697	0.433919	Plants	-0.0705303	True
31579	normal	normal	AMBTC	W1P1L9	U5DIT0	SELML	D8QQ38	-1	1	1	1	-1	1	0.432052	0.512827	0.206177	Plants	0.0807755	True
31579	normal	normal	AMBTC	W1P1L9	U5DER2	SELML	D8QQ38	-1	1	1	1	-1	1	0.432052	0.57189	0.206177	Plants	0.139839	True
31580	normal	normal	AMBTC	W1P822	W1PWE2	SELML	D8R7J9	1	1	-1	1	-1	1	0.673801	0.695308	0.299088	Plants	0.0215069	True
31580	normal	normal	AMBTC	W1P822	W1PLN6	SELML	D8R7J9	1	1	-1	1	-1	1	0.673801	0.511355	0.299088	Plants	-0.162446	True
31585	normal	normal	AMBTC	W1NG92	U5D646	SELML	D8SI43	-1	1	1	1	-1	1	0.269627	0.70524	0.178548	Plants	0.435613	True
31587	normal	normal	AMBTC	U5D8S4	W1PQN5	SELML	D8SYL6	1	1	1	1	1	1	0.298575	0.393322	0.0646156	Plants	0.0947469	True
31589	normal	normal	AMBTC	W1NQG0	U5D455	SELML	D8QWI1	1	1	-1	1	-1	1	0.664992	0.46466	0.226986	Plants	-0.200332	True
31589	normal	normal	AMBTC	W1NQG0	W1P8A8	SELML	D8QWI1			-1	1			0.664992		0.226986	Plants		True
31602	normal	normal	AMBTC	U5D2P7	W1PSZ6	SELML	D8RVV9	-1	1	1	1	-1	1	0.590196	0.638388	0.668466	Plants	0.0481915	True
31602	normal	normal	AMBTC	U5D2P7	U5D1I8	SELML	D8RVV9	-1	1	1	1	-1	1	0.590196	0.663584	0.668466	Plants	0.0733878	True
31602	normal	normal	AMBTC	U5D2P7	W1PM89	SELML	D8RVV9	-1	1	1	1	-1	1	0.590196	0.552834	0.668466	Plants	-0.0373623	True
31602	normal	normal	AMBTC	U5D2P7	U5DAV7	SELML	D8RVV9	-1	1	1	1	-1	1	0.590196	0.656094	0.668466	Plants	0.0658977	True
31604	normal	normal	AMBTC	U5CSP2	W1NLI7	SELML	D8RCW6	1	1	1	1	1	1	0.621315	0.673132	0.464972	Plants	0.0518169	True
31618	normal	normal	AMBTC	W1PMH9	W1NKE7	SELML	D8QZB7	1	1	1	1	1	1	0.725536	0.713699	0.710782	Plants	-0.011837	True
31621	normal	normal	AMBTC	W1PK42	W1NG81	SELML	D8R619	1	1	1	1	1	1	0.917047	0.765015	0.381331	Plants	-0.152032	True
31621	normal	normal	AMBTC	W1PK42	W1PC26	SELML	D8R619	1	1	1	1	1	1	0.917047	0.62531	0.381331	Plants	-0.291737	True
31621	normal	normal	AMBTC	W1PK42	W1PF15	SELML	D8R619	1	1	1	1	1	1	0.917047	0.708995	0.381331	Plants	-0.208052	True
31621	normal	normal	AMBTC	W1PK42	W1PY38	SELML	D8R619	1	1	1	1	1	1	0.917047	0.737001	0.381331	Plants	-0.180046	True
31636	normal	normal	AMBTC	W1NDV6	W1PRW4	SELML	D8T0A9	-1	1	1	1	-1	1	0.898935	0.736936	0.863223	Plants	-0.161999	True
31636	normal	normal	AMBTC	U5DIA7	W1P4D6	SELML	D8RRI6	1	1	1	1	1	1	0.84847	0.649099	0.312974	Plants	-0.19937	True
31636	normal	normal	AMBTC	W1PKW7	W1PMF4	SELML	D8TF01	-1	1	-1	1	1	1	0.892836	0.779996	0.241741	Plants	-0.11284	True
31636	normal	normal	AMBTC	W1PKW7	U5D0V1	SELML	D8TF01			-1	1			0.892836		0.241741	Plants		True
31636	normal	normal	AMBTC	W1PZ11	W1NF64	SELML	D8TC99	1	1	1	1	1	1	0.67561	0.990514	0.563597	Plants	0.314904	True
31636	normal	normal	AMBTC	U5D5N8	U5D4Y0	SELML	D8S0H1	-1	1	-1	1	1	1	0.555837	0.500735	0.0643007	Plants	-0.0551028	True
31636	normal	normal	AMBTC	W1NVH5	W1PAN1	SELML	D8RJC6	1	1	-1	1	-1	1	0.441955	0.478622	0.0915551	Plants	0.036667	True
31636	normal	normal	AMBTC	W1NVH5	W1PX24	SELML	D8RJC6	1	1	-1	1	-1	1	0.441955	0.247969	0.0915551	Plants	-0.193986	True
31636	normal	normal	AMBTC	W1P9G4	U5CXD5	SELML	D8TF12	-1	1	-1	1	1	1	0.564204	0.993818	0.338007	Plants	0.429614	True
31636	normal	normal	AMBTC	W1P9G4	U5D3G5	SELML	D8TF12	-1	1	-1	1	1	1	0.564204	0.602119	0.338007	Plants	0.0379159	True
31636	normal	normal	AMBTC	W1NQJ9	W1NG33	SELML	A9LY09	-1	1	1	1	-1	1	0.515611	0.426848	0.0871874	Plants	-0.0887625	True
31642	normal	normal	AMBTC	W1PEZ0	W1PN34	SELML	D8RQA7	1	1	-1	1	-1	1	0.873529	0.820334	0.316563	Plants	-0.0531944	True
31642	normal	normal	AMBTC	W1PEZ0	U5D7C8	SELML	D8RQA7	1	1	-1	1	-1	1	0.873529	0.744684	0.316563	Plants	-0.128844	True
31642	normal	normal	AMBTC	U5DC75	U5D3F8	SELML	D8R974	-1	1	-1	1	1	1	0.779413	0.593395	0.307969	Plants	-0.186019	True
31642	normal	normal	AMBTC	W1NV57	U5CZ18	SELML	D8S2P3	1	1	1	1	1	1	0.658626	0.728143	0.454189	Plants	0.0695174	True
31642	normal	normal	AMBTC	W1NV57	W1NN77	SELML	D8S2P3	1	1	1	1	1	1	0.658626	0.579741	0.454189	Plants	-0.0788847	True
31642	normal	normal	AMBTC	W1P114	W1PGD5	SELML	D8T6W7	1	1	1	1	1	1	0.551188	0.661383	0.141441	Plants	0.110195	True
31645	normal	normal	AMBTC	W1PF99	W1PL36	SELML	D8SRN3	-1	1	1	1	-1	1	0.412235	0.464121	0.198862	Plants	0.0518854	True
31651	normal	normal	AMBTC	W1PTY1	U5CV03	SELML	D8SES8	-1	1	-1	1	1	1	0.516269	0.298953	0.376271	Plants	-0.217315	True
31656	normal	normal	AMBTC	U5D0K4	W1PSJ7	SELML	D8SL55	1	1	1	1	1	1	0.622189	0.959139	0.487298	Plants	0.33695	True
31657	normal	normal	AMBTC	W1P027	W1NJA6	SELML	D8RYT7	-1	1	-1	1	1	1	0.786725	0.504135	0.423487	Plants	-0.282591	True
31673	normal	normal	AMBTC	U5CX19	U5D6J9	SELML	D8SX60	1	1	1	1	1	1	0.216069	0.696155	0.217592	Plants	0.480086	True
31673	normal	normal	AMBTC	U5CX19	W1PU16	SELML	D8SX60	1	1	1	1	1	1	0.216069	0.509637	0.217592	Plants	0.293568	True
31673	normal	normal	AMBTC	U5CX19	W1NJ85	SELML	D8SX60	1	1	1	1	1	1	0.216069	0.690307	0.217592	Plants	0.474239	True
31676	normal	normal	AMBTC	W1P2M0	W1NRV6	SELML	D8RJM9	-1	1	1	1	-1	1	0.262791	0.19742	0.828077	Plants	-0.0653702	True
31676	normal	normal	AMBTC	W1Q0T5	W1PNF0	SELML	D8SWR0	1	1	-1	1	-1	1	0.406995	0.489994	0.085201	Plants	0.0829984	True
31676	normal	normal	AMBTC	W1Q0T5	W1P3J6	SELML	D8SWR0	1	1	-1	1	-1	1	0.406995	0.25773	0.085201	Plants	-0.149265	True
31676	normal	normal	AMBTC	W1PG95	W1PHE4	SELML	D8QWS3	1	1	1	1	1	1	0.0924645	0.388787	0.0636815	Plants	0.296323	True
31677	normal	normal	AMBTC	W1PF40	U5D697	SELML	D8QN45							0.818644			Plants		True
31677	normal	normal	AMBTC	W1PF40	W1NEW7	SELML	D8QN45	1	1					0.818644	0.964158		Plants	0.145514	True
31677	normal	normal	AMBTC	W1NX51	W1PZW9	SELML	D8RX84	1	1	1	1	1	1	0.552709	0.7954	0.819869	Plants	0.242691	True
31677	normal	normal	AMBTC	W1NX51	W1P8P0	SELML	D8RX84	1	1	1	1	1	1	0.552709	0.362286	0.819869	Plants	-0.190423	True
31681	normal	normal	AMBTC	W1NR64	W1PPL5	SELML	D8SK49	-1	1	1	1	-1	1	0.414878	0.518541	0.244867	Plants	0.103663	True
31681	normal	normal	AMBTC	W1NR64	U5D932	SELML	D8SK49	-1	1	1	1	-1	1	0.414878	0.772989	0.244867	Plants	0.358111	True
31681	normal	normal	AMBTC	W1NR64	W1PLK1	SELML	D8SK49	-1	1	1	1	-1	1	0.414878	0.581101	0.244867	Plants	0.166223	True
31683	normal	normal	AMBTC	W1P880	U5D0T4	SELML	D8SE80	1	1	1	1	1	1	0.657943	0.548025	0.1852	Plants	-0.109918	True
31683	normal	normal	AMBTC	W1Q050	W1NRA0	SELML	D8SG06	1	1	-1	1	-1	1	0.701899	0.66093	0.240184	Plants	-0.0409695	True
31692	normal	normal	AMBTC	W1NHG1	W1P250	SELML	D8SIQ1	1	1	-1	1	-1	1	0.637005	0.737464	0.398975	Plants	0.100459	True
31692	normal	normal	AMBTC	W1NHG1	W1NXW5	SELML	D8SIQ1	1	1	-1	1	-1	1	0.637005	0.915988	0.398975	Plants	0.278983	True
31696	normal	normal	AMBTC	W1PB83	W1NNN4	SELML	D8R4F0	1	1	1	1	1	1	0.4635	0.540641	0.25925	Plants	0.0771402	True
31696	normal	normal	AMBTC	W1PB83	W1NEX1	SELML	D8R4F0	1	1	1	1	1	1	0.4635	0.764647	0.25925	Plants	0.301146	True
31707	normal	normal	AMBTC	W1NZV2	W1PZU9	SELML	D8SCR0					-1	1	0.95796	0.690762	0.571701	Plants	-0.267199	True
31707	normal	normal	AMBTC	W1NZV2	W1P6V5	SELML	D8SCR0					-1	1	0.95796	0.79243	0.571701	Plants	-0.16553	True
31707	normal	normal	AMBTC	W1NZV2	W1NFB3	SELML	D8SCR0							0.95796		0.571701	Plants		True
31713	normal	normal	AMBTC	W1PH40	W1P260	SELML	D8TC45	1	1	1	1	1	1	0.268392	0.14402	0.067982	Plants	-0.124372	True
31718	normal	normal	AMBTC	W1NXU3	W1NK93	SELML	D8RNV6	1	1					0.52197	0.930436		Plants	0.408466	True
31718	normal	normal	AMBTC	W1NXU3	W1NJF0	SELML	D8RNV6	1	1					0.52197	0.754037		Plants	0.232067	True
31719	normal	normal	AMBTC	W1NQU5	W1NQ04	SELML	D8T639	1	1	-1	1	-1	1	0.714364	0.697179	0.283071	Plants	-0.0171846	True
31719	normal	normal	AMBTC	W1NQU5	W1NH49	SELML	D8T639	1	1	-1	1	-1	1	0.714364	0.449625	0.283071	Plants	-0.264739	True
31719	normal	normal	AMBTC	W1P8R5	W1PEX0	SELML	D8RGI0	-1	1	-1	1	1	1	0.758802	0.403901	0.274094	Plants	-0.354901	True
31721	normal	normal	AMBTC	W1NH16	U5CWE4	SELML	D8R2N2	1	1	-1	1	-1	1	0.661283	0.490494	0.226831	Plants	-0.170789	True
31722	normal	normal	AMBTC	W1NVB6	W1P8R9	SELML	D8S1T8	1	1	1	1	1	1	0.322629	0.711225	0.25911	Plants	0.388596	True
31722	normal	normal	AMBTC	W1NVB6	W1NQQ7	SELML	D8S1T8	1	1	1	1	1	1	0.322629	0.614381	0.25911	Plants	0.291752	True
31727	normal	normal	AMBTC	W1PEG2	W1PF49	SELML	D8QRX8	1	1	1	1	1	1	0.547759	0.732785	0.149287	Plants	0.185026	True
31734	normal	normal	AMBTC	W1P1I6	W1NPM0	SELML	D8TBT7	-1	1	-1	1	1	1	0.427399	0.346825	0.101526	Plants	-0.080574	True
31734	normal	normal	AMBTC	W1P1I6	W1P0H3	SELML	D8TBT7	1	1	-1	1	-1	1	0.427399	0.255471	0.101526	Plants	-0.171928	True
31734	normal	normal	AMBTC	W1P1I6	U5D491	SELML	D8TBT7	1	1	-1	1	-1	1	0.427399	0.466931	0.101526	Plants	0.0395324	True
31734	normal	normal	AMBTC	W1P1I6	W1NN64	SELML	D8TBT7	-1	1	-1	1	1	1	0.427399	0.351409	0.101526	Plants	-0.0759901	True
31734	normal	normal	AMBTC	W1P1I6	W1PPK3	SELML	D8TBT7	1	1	-1	1	-1	1	0.427399	0.354263	0.101526	Plants	-0.0731362	True
31734	normal	normal	AMBTC	W1P1I6	W1NWP5	SELML	D8TBT7	1	1	-1	1	-1	1	0.427399	0.396749	0.101526	Plants	-0.0306496	True
31734	normal	normal	AMBTC	W1P1I6	W1NPA1	SELML	D8TBT7	1	1	-1	1	-1	1	0.427399	0.346098	0.101526	Plants	-0.0813013	True
31734	normal	normal	AMBTC	W1P1I6	U5D0B5	SELML	D8TBT7	1	1	-1	1	-1	1	0.427399	0.294084	0.101526	Plants	-0.133315	True
31739	normal	normal	AMBTC	U5CP66	U5DCL7	SELML	D8QSF9	1	1	1	1	1	1	0.465497	0.731646	0.0587344	Plants	0.266149	True
31741	normal	normal	AMBTC	W1PFB6	W1NQT8	SELML	D8SZ19	1	1	1	1	1	1	0.267401	0.318646	0.210609	Plants	0.0512444	True
31741	normal	normal	AMBTC	W1PFB6	W1NHA8	SELML	D8SZ19	1	1	1	1	1	1	0.267401	0.211614	0.210609	Plants	-0.0557873	True
31741	normal	normal	AMBTC	W1P197	W1PDI1	SELML	D8RMG7	1	1	1	1	1	1	0.379926	0.553603	0.0260612	Plants	0.173678	True
31741	normal	normal	AMBTC	W1NHZ8	U5D2P0	SELML	D8RSC2	1	1	1	1	1	1	0.347263	0.485052	0.147412	Plants	0.137789	True
31741	normal	normal	AMBTC	W1PI12	W1PT84	SELML	D8R897	1	1	-1	1	-1	1	0.580105	0.315261	0.275999	Plants	-0.264844	True
31744	normal	normal	AMBTC	W1NG41	U5CXY1	SELML	D8QP82	-1	1	1	1	-1	1	0.759694	0.533286	0.456164	Plants	-0.226408	True
31744	normal	normal	AMBTC	G0LD32	W1NFF0	SELML	D8RJ40	1	1	1	1	1	1	0.857568	0.640103	0.805947	Plants	-0.217466	True
31744	normal	normal	AMBTC	G0LD32	W1PUQ6	SELML	D8RJ40	1	1	1	1	1	1	0.857568	0.688738	0.805947	Plants	-0.16883	True
31744	normal	normal	AMBTC	G0LD32	U5D968	SELML	D8RJ40			1	1			0.857568		0.805947	Plants		True
31744	normal	normal	AMBTC	G0LD32	W1P8N1	SELML	D8RJ40	1	1	1	1	1	1	0.857568	0.907315	0.805947	Plants	0.0497462	True
31744	normal	normal	AMBTC	G0LD32	W1NVI1	SELML	D8RJ40	1	1	1	1	1	1	0.857568	0.756186	0.805947	Plants	-0.101382	True
31745	normal	normal	AMBTC	W1NVW1	W1P9V1	SELML	D8R3J9	-1	1	1	1	-1	1	0.27731	0.325043	0.202375	Plants	0.0477332	True
31747	normal	normal	AMBTC	W1NQP4	W1PNK2	SELML	D8SXZ7	1	1	-1	1	-1	1	0.177561	0.615246	0.0555359	Plants	0.437685	True
31752	normal	normal	AMBTC	W1NEB1	W1NQD1	SELML	D8RVR5	1	1	-1	1	-1	1	0.582451	0.792509	0.413929	Plants	0.210058	True
31752	normal	normal	AMBTC	W1NEB1	W1PRZ0	SELML	D8RVR5	-1	1	-1	1	1	1	0.582451	0.612212	0.413929	Plants	0.0297607	True
31755	normal	normal	AMBTC	W1NGE9	U5CXP6	SELML	D8QW35	1	1	1	1	1	1	0.476379	0.580206	0.153308	Plants	0.103827	True
31762	normal	normal	AMBTC	U5CU88	W1PEU5	SELML	D8QZK7	1	1	1	1	1	1	0.456552	0.366197	0.0421713	Plants	-0.0903554	True
31769	normal	normal	AMBTC	W1NHI7	W1P8M2	SELML	D8R5L1	1	1	1	1	1	1	0.29946	0.353536	0.0811992	Plants	0.0540759	True
31789	normal	normal	AMBTC	W1P9E8	W1PC47	SELML	D8QQ70	1	1	1	1	1	1	0.283944	0.355891	0.0216389	Plants	0.0719468	True
31791	normal	normal	AMBTC	W1NML1	W1NDH0	SELML	D8QTU9	-1	1	1	1	-1	1	0.182043	0.287308	0.318215	Plants	0.105265	True
31791	normal	normal	AMBTC	W1NML1	W1P8H4	SELML	D8QTU9	1	1	1	1	1	1	0.182043	0.321534	0.318215	Plants	0.139492	True
31791	normal	normal	AMBTC	W1NML1	W1PEQ4	SELML	D8QTU9	-1	1	1	1	-1	1	0.182043	0.328558	0.318215	Plants	0.146516	True
31791	normal	normal	AMBTC	W1NML1	U5DI16	SELML	D8QTU9	1	1	1	1	1	1	0.182043	0.257829	0.318215	Plants	0.0757865	True
31798	normal	normal	AMBTC	W1NHL8	W1PUE5	SELML	D8T212	1	1	-1	1	-1	1	0.553608	0.418356	0.118483	Plants	-0.135252	True
31805	normal	normal	AMBTC	W1NPP0	W1P9I1	SELML	D8SQD2	-1	1	-1	1	1	1	0.417444	0.290087	0.0829907	Plants	-0.127357	True
31807	normal	normal	AMBTC	W1NFE2	U5D079	SELML	D8QPA5	1	1	-1	1	-1	1	0.54736	0.795882	0.0919412	Plants	0.248521	True
31807	normal	normal	AMBTC	W1NFE2	W1NFF7	SELML	D8QPA5	1	1	-1	1	-1	1	0.54736	0.495014	0.0919412	Plants	-0.052346	True
31808	normal	normal	AMBTC	W1PSI6	W1PJC2	SELML	D8SEZ1	1	1	1	1	1	1	0.32875	0.355467	0.199504	Plants	0.0267176	True
31808	normal	normal	AMBTC	W1PSI6	U5D5D3	SELML	D8SEZ1	-1	1	1	1	-1	1	0.32875	0.382766	0.199504	Plants	0.0540158	True
31818	normal	normal	AMBTC	W1NM98	W1P1E8	SELML	D8ST56	1	1	1	1	1	1	0.414527	0.541943	0.262287	Plants	0.127416	True
31827	normal	normal	AMBTC	W1NFV5	W1P9L0	SELML	D8RHE8	1	1	-1	1	-1	1	0.309369	0.283862	0.107422	Plants	-0.0255072	True
31832	normal	normal	AMBTC	W1NWX0	W1NLH9	SELML	D8SFJ7	-1	1	1	1	-1	1	0.499174	0.424827	0.225505	Plants	-0.074347	True
31832	normal	normal	AMBTC	W1NWX0	U5DDP7	SELML	D8SFJ7	1	1	1	1	1	1	0.499174	0.460917	0.225505	Plants	-0.0382569	True
31832	normal	normal	AMBTC	W1NWX0	W1Q0N9	SELML	D8SFJ7	-1	1	1	1	-1	1	0.499174	0.424759	0.225505	Plants	-0.0744142	True
31846	normal	normal	AMBTC	W1P371	W1P292	SELML	D8SLT0	1	1	1	1	1	1	0.521721	0.461792	0.301968	Plants	-0.0599284	True
31846	normal	normal	AMBTC	W1P371	W1P0F5	SELML	D8SLT0	1	1	1	1	1	1	0.521721	0.526013	0.301968	Plants	0.00429199	True
31846	normal	normal	AMBTC	W1P371	W1P8N4	SELML	D8SLT0	1	1	1	1	1	1	0.521721	0.477742	0.301968	Plants	-0.043979	True
31846	normal	normal	AMBTC	W1P371	W1PS98	SELML	D8SLT0	1	1	1	1	1	1	0.521721	0.525323	0.301968	Plants	0.00360248	True
31851	normal	normal	AMBTC	W1NST5	W1PN96	SELML	D8T3K5	1	1	-1	1	-1	1	0.721863	0.817324	0.733885	Plants	0.0954613	True
31852	normal	normal	AMBTC	W1NTR0	U5D3T4	SELML	D8QQ81	1	1	1	1	1	1	0.598749	0.615801	0.174602	Plants	0.0170524	True
31852	normal	normal	AMBTC	W1NTR0	W1PND9	SELML	D8QQ81	1	1	1	1	1	1	0.598749	0.323254	0.174602	Plants	-0.275495	True
31852	normal	normal	AMBTC	W1P372	U5DBT0	SELML	D8RB41	1	1	1	1	1	1	0.482139	0.551635	0.337473	Plants	0.0694962	True
31852	normal	normal	AMBTC	W1P372	W1NEE3	SELML	D8RB41	-1	1	1	1	-1	1	0.482139	0.949661	0.337473	Plants	0.467522	True
31852	normal	normal	AMBTC	W1P372	W1P9L5	SELML	D8RB41	1	1	1	1	1	1	0.482139	0.749639	0.337473	Plants	0.267499	True
31852	normal	normal	AMBTC	W1P372	W1PVQ8	SELML	D8RB41	-1	1	1	1	-1	1	0.482139	0.62937	0.337473	Plants	0.14723	True
31860	normal	normal	AMBTC	W1P7S4	W1PJT1	SELML	D8S3T7	-1	1	1	1	-1	1	0.529547	0.463772	0.15095	Plants	-0.065775	True
31865	normal	normal	AMBTC	W1NZA0	W1NUW6	SELML	D8RH43	1	1	-1	1	-1	1	0.255345	0.711604	0.380907	Plants	0.456259	True
31865	normal	normal	AMBTC	W1NZA0	W1P355	SELML	D8RH43	-1	1	-1	1	1	1	0.255345	0.508355	0.380907	Plants	0.25301	True
31865	normal	normal	AMBTC	W1NZA0	U5D3G3	SELML	D8RH43	-1	1	-1	1	1	1	0.255345	0.508157	0.380907	Plants	0.252811	True
31867	normal	normal	AMBTC	W1P867	W1NMT2	SELML	D8SF06	-1	1	-1	1	1	1	0.622148	0.765196	0.324579	Plants	0.143048	True
31867	normal	normal	AMBTC	W1P867	W1PIS6	SELML	D8SF06	-1	1	-1	1	1	1	0.622148	0.37542	0.324579	Plants	-0.246727	True
31867	normal	normal	AMBTC	W1P867	W1NH78	SELML	D8SF06	-1	1	-1	1	1	1	0.622148	0.42697	0.324579	Plants	-0.195177	True
31867	normal	normal	AMBTC	W1P867	W1NNB8	SELML	D8SF06	-1	1	-1	1	1	1	0.622148	0.616907	0.324579	Plants	-0.00524069	True
31871	normal	normal	AMBTC	U5D1C3	W1PWH6	SELML	D8RCY6	-1	1	-1	1	1	1	0.415399	0.376959	0.208749	Plants	-0.0384397	True
31874	normal	normal	AMBTC	W1NNG9	W1PQZ5	SELML	D8QSN1	1	1	1	1	1	1	0.726536	0.737283	0.387326	Plants	0.0107467	True
31876	normal	normal	AMBTC	W1NV87	W1PM16	SELML	D8RJ72	1	1	1	1	1	1	0.258706	0.37188	0.0693364	Plants	0.113175	True
31876	normal	normal	AMBTC	W1NV87	U5D5I6	SELML	D8RJ72	-1	1	1	1	-1	1	0.258706	0.492524	0.0693364	Plants	0.233818	True
31881	normal	normal	AMBTC	W1PYE4	W1P958	SELML	D8SB65	1	1	1	1	1	1	0.723433	0.973532	0.402903	Plants	0.250099	True
31896	normal	normal	AMBTC	W1PPK5	W1NGQ5	SELML	D8T5H2	-1	1	-1	1	1	1	0.540192	0.561036	0.156831	Plants	0.0208441	True
31896	normal	normal	AMBTC	W1PPK5	U5CKI6	SELML	D8T5H2	1	1	-1	1	-1	1	0.540192	0.630515	0.156831	Plants	0.0903226	True
31901	normal	normal	AMBTC	W1NST8	W1P6V1	SELML	D8S429	-1	1	1	1	-1	1	0.324631	0.767192	0.233986	Plants	0.44256	True
31901	normal	normal	AMBTC	W1PY02	W1NMZ9	SELML	D8RXG4	1	1	-1	1	-1	1	0.872288	0.690803	0.0436544	Plants	-0.181485	True
31901	normal	normal	AMBTC	W1PY02	W1PFB0	SELML	D8RXG4	1	1	-1	1	-1	1	0.872288	0.708844	0.0436544	Plants	-0.163443	True
31901	normal	normal	AMBTC	W1PY02	W1P3I7	SELML	D8RXG4	-1	1	-1	1	1	1	0.872288	0.654107	0.0436544	Plants	-0.218181	True
31902	normal	normal	AMBTC	W1Q0W3	U5DCS0	SELML	D8R672	1	1	-1	1	-1	1	0.412794	0.292511	0.237576	Plants	-0.120283	True
31906	normal	normal	AMBTC	W1PTP4	U5D2B7	SELML	D8QPE0	1	1	1	1	1	1	0.340492	0.291963	0.195875	Plants	-0.0485284	True
31916	normal	normal	AMBTC	W1PZF0	W1PEX8	SELML	D8RBK2	1	1	1	1	1	1	0.256663	0.462271	0.579018	Plants	0.205608	True
31916	normal	normal	AMBTC	W1PSY5	W1P8H5	SELML	D8RVI5	-1	1	1	1	-1	1	0.444918	0.327	0.172387	Plants	-0.117918	True
31917	normal	normal	AMBTC	W1PGL3	W1P7F3	SELML	D8S3S6					-1	1	0.805533	0.495453	0.0602474	Plants	-0.310081	True
31917	normal	normal	AMBTC	W1PGL3	W1P1E9	SELML	D8S3S6					-1	1	0.805533	0.342242	0.0602474	Plants	-0.463291	True
31917	normal	normal	AMBTC	W1P024	W1PS77	SELML	D8S2B5	1	1	-1	1	-1	1	0.306305	0.356512	0.156611	Plants	0.0502068	True
31928	normal	normal	AMBTC	U5DIB1	W1P8Q6	SELML	D8R3C7	1	1	-1	1	-1	1	0.350654	0.577321	0.0964887	Plants	0.226667	True
31928	normal	normal	AMBTC	U5DIB1	W1PD25	SELML	D8R3C7	1	1	-1	1	-1	1	0.350654	0.335225	0.0964887	Plants	-0.0154292	True
31933	normal	normal	AMBTC	W1NNT5	W1NNV9	SELML	D8R6L4	1	1	-1	1	-1	1	0.592133	0.57225	0.0783855	Plants	-0.0198827	True
31934	normal	normal	AMBTC	U5CYR9	W1NSS0	SELML	D8S5N3	-1	1	-1	1	1	1	0.377941	0.20649	0.0892889	Plants	-0.171451	True
31942	normal	normal	AMBTC	W1NJ68	U5DEI6	SELML	D8QRE4	1	1	1	1	1	1	0.525288	0.449657	0.36847	Plants	-0.0756316	True
31942	normal	normal	AMBTC	U5D073	U5D3J1	SELML	D8QYZ7	-1	1	1	1	-1	1	0.348592	0.509815	0.296928	Plants	0.161223	True
31942	normal	normal	AMBTC	U5D073	U5D6V1	SELML	D8QYZ7	-1	1	1	1	-1	1	0.348592	0.331326	0.296928	Plants	-0.0172659	True
31942	normal	normal	AMBTC	U5D073	W1PQA4	SELML	D8QYZ7	-1	1	1	1	-1	1	0.348592	0.712082	0.296928	Plants	0.36349	True
31942	normal	normal	AMBTC	U5D073	W1NQW7	SELML	D8QYZ7	1	1	1	1	1	1	0.348592	0.444208	0.296928	Plants	0.0956161	True
31945	normal	normal	AMBTC	W1P8M8	W1PV58	SELML	D8RIG6	-1	1	1	1	-1	1	0.485228	0.821698	0.269133	Plants	0.33647	True
31948	normal	normal	AMBTC	W1NZ83	W1PTK9	SELML	D8SD40	1	1	1	1	1	1	0.657654	0.587333	0.477787	Plants	-0.0703214	True
31948	normal	normal	AMBTC	W1NZ83	W1NGZ3	SELML	D8SD40	-1	1	1	1	-1	1	0.657654	0.735048	0.477787	Plants	0.0773936	True
31948	normal	normal	AMBTC	W1NZ83	W1NVZ6	SELML	D8SD40	1	1	1	1	1	1	0.657654	0.662765	0.477787	Plants	0.00511145	True
31948	normal	normal	AMBTC	W1NZ83	W1NG61	SELML	D8SD40	1	1	1	1	1	1	0.657654	0.501297	0.477787	Plants	-0.156357	True
31948	normal	normal	AMBTC	W1NZ83	U5CZE1	SELML	D8SD40	1	1	1	1	1	1	0.657654	0.782401	0.477787	Plants	0.124747	True
31949	normal	normal	AMBTC	W1PB53	W1PPE7	SELML	D8STI2	-1	1	1	1	-1	1	0.500024	0.589863	0.128956	Plants	0.0898386	True
31960	normal	normal	AMBTC	W1PYT1	U5DAU2	SELML	D8SZN7	1	1	1	1	1	1	0.264986	0.376267	0.246028	Plants	0.111281	True
31963	normal	normal	AMBTC	W1PYH6	W1Q0S7	SELML	D8SWF8	-1	1	-1	1	1	1	0.623575	0.470059	0.350087	Plants	-0.153516	True
31963	normal	normal	AMBTC	W1PYH6	W1NM29	SELML	D8SWF8	-1	1	-1	1	1	1	0.623575	0.377296	0.350087	Plants	-0.246279	True
31964	normal	normal	AMBTC	W1P8Q3	W1P5E6	SELML	D8QVT5					1	1	0.948412	0.341834	0.287528	Plants	-0.606578	True
31964	normal	normal	AMBTC	W1P8Q3	W1NXH9	SELML	D8QVT5					1	1	0.948412	0.688718	0.287528	Plants	-0.259694	True
31964	normal	normal	AMBTC	W1P8Q3	W1P7X6	SELML	D8QVT5					1	1	0.948412	0.481457	0.287528	Plants	-0.466955	True
31969	normal	normal	AMBTC	W1NWD1	W1P5N4	SELML	D8R6K4	1	1	-1	1	-1	1	0.138908	0.209283	0.196804	Plants	0.0703754	True
31969	normal	normal	AMBTC	W1NWD1	W1PQ83	SELML	D8R6K4	1	1	-1	1	-1	1	0.138908	0.609984	0.196804	Plants	0.471076	True
31969	normal	normal	AMBTC	W1NWD1	W1P8I2	SELML	D8R6K4	1	1	-1	1	-1	1	0.138908	0.493733	0.196804	Plants	0.354825	True
31972	normal	normal	AMBTC	W1NTI2	U5DDS0	SELML	D8S3G2	1	1	-1	1	-1	1	0.292338	0.672207	0.249118	Plants	0.379869	True
31972	normal	normal	AMBTC	W1NTI2	U5DAD5	SELML	D8S3G2	-1	1	-1	1	1	1	0.292338	0.428215	0.249118	Plants	0.135876	True
31972	normal	normal	AMBTC	W1NTI2	W1PR21	SELML	D8S3G2	1	1	-1	1	-1	1	0.292338	0.780842	0.249118	Plants	0.488504	True
31984	normal	normal	AMBTC	W1NRR8	W1PTA7	SELML	D8T091	-1	1	-1	1	1	1	0.342081	0.623977	0.056123	Plants	0.281897	True
31985	normal	normal	AMBTC	U5CPK5	W1NZQ7	SELML	D8SV75	-1	1	1	1	-1	1	0.655883	0.688035	0.338161	Plants	0.0321513	True
31985	normal	normal	AMBTC	U5CPK5	W1PY09	SELML	D8SV75	-1	1	1	1	-1	1	0.655883	0.985803	0.338161	Plants	0.32992	True
31985	normal	normal	AMBTC	W1Q123	W1NYC1	SELML	D8RZ31	-1	1	1	1	-1	1	0.543483	0.929852	0.282205	Plants	0.386369	True
31985	normal	normal	AMBTC	W1Q123	W1PD79	SELML	D8RZ31	-1	1	1	1	-1	1	0.543483	0.777016	0.282205	Plants	0.233533	True
31985	normal	normal	AMBTC	W1Q123	W1NYJ0	SELML	D8RZ31	-1	1	1	1	-1	1	0.543483	0.789239	0.282205	Plants	0.245756	True
31985	normal	normal	AMBTC	W1Q123	W1NRT2	SELML	D8RZ31	-1	1	1	1	-1	1	0.543483	0.857016	0.282205	Plants	0.313533	True
31989	normal	normal	AMBTC	U5DGG1	W1NVY5	SELML	D8SBM8	1	1	1	1	1	1	0.938816	0.972522	0.626484	Plants	0.0337066	True
31989	normal	normal	AMBTC	U5DGG1	W1NV27	SELML	D8SBM8	1	1	1	1	1	1	0.938816	0.89473	0.626484	Plants	-0.0440853	True
31989	normal	normal	AMBTC	W1NG30	W1PF05	SELML	D8T5C3	1	1	1	1	1	1	0.722558	0.590921	0.410546	Plants	-0.131637	True
31989	normal	normal	AMBTC	U5D537	W1PB15	SELML	D8QTJ0					1	1		0.171826	0.0720453	Plants		True
31989	normal	normal	AMBTC	U5D537	W1NLJ2	SELML	D8QTJ0					-1	1		0.55922	0.0720453	Plants		True
31989	normal	normal	AMBTC	U5D537	W1PXQ0	SELML	D8QTJ0									0.0720453	Plants		True
31989	normal	normal	AMBTC	U5D537	W1PKD3	SELML	D8QTJ0					1	1		0.421622	0.0720453	Plants		True
31989	normal	normal	AMBTC	U5D537	W1PH11	SELML	D8QTJ0					-1	1		0.550268	0.0720453	Plants		True
31989	normal	normal	AMBTC	U5D537	W1NSK1	SELML	D8QTJ0					-1	1		0.421207	0.0720453	Plants		True
31989	normal	normal	AMBTC	U5D537	U5CUT8	SELML	D8QTJ0					1	1		0.836589	0.0720453	Plants		True
31992	normal	normal	AMBTC	W1PG94	U5D3V2	SELML	D8R3A8	1	1	-1	1	-1	1	0.723594	0.569512	0.177877	Plants	-0.154082	True
31992	normal	normal	AMBTC	W1PG94	U5D5I8	SELML	D8R3A8	1	1	-1	1	-1	1	0.723594	0.710625	0.177877	Plants	-0.012969	True
31992	normal	normal	AMBTC	W1PG94	W1P4V2	SELML	D8R3A8	1	1	-1	1	-1	1	0.723594	0.536146	0.177877	Plants	-0.187448	True
31992	normal	normal	AMBTC	W1PG94	W1PJI4	SELML	D8R3A8	1	1	-1	1	-1	1	0.723594	0.710291	0.177877	Plants	-0.0133028	True
31992	normal	normal	AMBTC	W1PSB2	W1PCS4	SELML	D8RWQ9	-1	1	1	1	-1	1	0.543335	0.481393	0.355696	Plants	-0.0619421	True
31998	normal	normal	AMBTC	U5D1S6	W1NZP6	SELML	D8QMV4	1	1	1	1	1	1	0.298594	0.314356	0.0655166	Plants	0.0157618	True
32002	normal	normal	AMBTC	U5DCH8	W1PF37	SELML	D8RM70	-1	1	1	1	-1	1	0.458734	0.434786	0.428018	Plants	-0.0239473	True
32002	normal	normal	AMBTC	U5DCH8	W1NLI6	SELML	D8RM70	-1	1	1	1	-1	1	0.458734	0.519963	0.428018	Plants	0.0612291	True
32011	normal	normal	AMBTC	W1NDM5	U5CM77	SELML	D8SMM6	-1	1	-1	1	1	1	0.462139	0.548892	0.363819	Plants	0.0867526	True
32044	normal	normal	AMBTC	W1PGX3	W1PS03	SELML	D8T077	1	1	1	1	1	1	0.679457	0.32047	0.316275	Plants	-0.358987	True
32044	normal	normal	AMBTC	W1PGX3	U5DDQ8	SELML	D8T077	1	1	1	1	1	1	0.679457	0.462083	0.316275	Plants	-0.217373	True
32054	normal	normal	AMBTC	U5DFM1	W1NJ53	SELML	D8R1W3	-1	1	1	1	-1	1	0.244682	0.301192	0.080275	Plants	0.0565098	True
32080	normal	normal	AMBTC	W1NG26	W1PLQ9	SELML	D8R1N8	1	1	1	1	1	1	0.702132	0.475742	0.182017	Plants	-0.22639	True
32080	normal	normal	AMBTC	W1NG26	W1NFA4	SELML	D8R1N8	1	1	1	1	1	1	0.702132	0.500339	0.182017	Plants	-0.201793	True
32080	normal	normal	AMBTC	W1NG26	W1PWY1	SELML	D8R1N8	1	1	1	1	1	1	0.702132	0.732769	0.182017	Plants	0.0306371	True
32093	normal	normal	AMBTC	W1P251	W1PLS0	SELML	D8RMP8	1	1	-1	1	-1	1	0.609932	0.933471	0.75228	Plants	0.323539	True
32093	normal	normal	AMBTC	W1P251	U5D346	SELML	D8RMP8	-1	1	-1	1	1	1	0.609932	0.444675	0.75228	Plants	-0.165257	True
32093	normal	normal	AMBTC	W1P251	U5CPV7	SELML	D8RMP8	1	1	-1	1	-1	1	0.609932	0.810353	0.75228	Plants	0.200422	True
32100	normal	normal	AMBTC	W1P5Y0	W1Q0C3	SELML	D8RWM3	1	1	1	1	1	1	0.329009	0.483944	0.138838	Plants	0.154934	True
32116	normal	normal	AMBTC	U5DBK5	W1P912	SELML	D8RE39	1	1	1	1	1	1	0.315913	0.4232	0.0776542	Plants	0.107287	True
32116	normal	normal	AMBTC	W1NW99	W1NSS1	SELML	D8SK68	1	1	1	1	1	1	0.465834	0.794981	0.144027	Plants	0.329147	True
32116	normal	normal	AMBTC	W1NW99	U5DIR1	SELML	D8SK68	1	1	1	1	1	1	0.465834	0.61158	0.144027	Plants	0.145746	True
32116	normal	normal	AMBTC	W1NKH1	W1PC06	SELML	D8RI59	1	1	1	1	1	1	0.294192	0.380003	0.100854	Plants	0.0858106	True
32116	normal	normal	AMBTC	W1NKH1	U5DFA9	SELML	D8RI59	1	1	1	1	1	1	0.294192	0.347985	0.100854	Plants	0.0537931	True
32116	normal	normal	AMBTC	W1NKH1	W1P0G5	SELML	D8RI59	1	1	1	1	1	1	0.294192	0.398028	0.100854	Plants	0.103836	True
32208	normal	normal	AMBTC	W1NS29	W1NLZ3	SELML	D8RX29	1	1	-1	1	-1	1	0.719866	0.9604	0.885472	Plants	0.240534	True
32208	normal	normal	AMBTC	W1NS29	W1P123	SELML	D8RX29	1	1	-1	1	-1	1	0.719866	0.79128	0.885472	Plants	0.0714134	True
32208	normal	normal	AMBTC	W1NS29	W1PST2	SELML	D8RX29	-1	1	-1	1	1	1	0.719866	0.761394	0.885472	Plants	0.0415276	True
32219	normal	normal	AMBTC	W1PW18	U5DG85	SELML	D8R878	1	1	1	1	1	1	0.177786	0.126713	0.0734225	Plants	-0.0510729	True
32227	normal	normal	AMBTC	W1NYB4	W1PKU8	SELML	D8R3L3	1	1	1	1	1	1	0.711388	0.784059	0.439145	Plants	0.0726709	True
32227	normal	normal	AMBTC	W1NYB4	U5CUT5	SELML	D8R3L3	1	1	1	1	1	1	0.711388	0.897215	0.439145	Plants	0.185827	True
32227	normal	normal	AMBTC	W1NYB4	W1P5E7	SELML	D8R3L3	-1	1	1	1	-1	1	0.711388	0.816935	0.439145	Plants	0.105547	True
32227	normal	normal	AMBTC	W1PGA6	W1P9R9	SELML	D8SFW7	1	1	-1	1	-1	1	0.761381	0.327844	0.773936	Plants	-0.433537	True
32227	normal	normal	AMBTC	W1PGA6	U5D2N6	SELML	D8SFW7	-1	1	-1	1	1	1	0.761381	0.416453	0.773936	Plants	-0.344928	True
32227	normal	normal	AMBTC	W1PGA6	W1P0D9	SELML	D8SFW7	1	1	-1	1	-1	1	0.761381	0.537441	0.773936	Plants	-0.22394	True
32227	normal	normal	AMBTC	W1NJH1	U5DAH4	SELML	D8R7G4	1	1	-1	1	-1	1	0.753486	0.639304	0.390395	Plants	-0.114182	True
32227	normal	normal	AMBTC	W1PV67	U5D0K6	SELML	D8SPW7	1	1					0.758053	0.515737		Plants	-0.242316	True
32227	normal	normal	AMBTC	W1NUZ0	W1PWP3	SELML	D8RG85	1	1	1	1	1	1	0.783328	0.537871	0.145229	Plants	-0.245457	True
32227	normal	normal	AMBTC	W1NUZ0	W1P5R6	SELML	D8RG85	1	1	1	1	1	1	0.783328	0.525305	0.145229	Plants	-0.258023	True
32227	normal	normal	AMBTC	W1NUZ0	W1NYH7	SELML	D8RG85	1	1	1	1	1	1	0.783328	0.600891	0.145229	Plants	-0.182437	True
32227	normal	normal	AMBTC	W1NUZ0	W1NEG9	SELML	D8RG85	1	1	1	1	1	1	0.783328	0.499936	0.145229	Plants	-0.283392	True
32241	normal	normal	AMBTC	U5D3H6	W1PXQ6	SELML	D8SIV3	1	1	1	1	1	1	0.407619	0.321452	0.38817	Plants	-0.0861668	True
32246	normal	normal	AMBTC	W1PAE9	U5D431	SELML	D8R0H1	1	1	-1	1	-1	1	0.58211	0.262174	0.295049	Plants	-0.319936	True
32246	normal	normal	AMBTC	W1PAE9	W1PB77	SELML	D8R0H1	1	1	-1	1	-1	1	0.58211	0.542512	0.295049	Plants	-0.0395977	True
32254	normal	normal	AMBTC	W1PWY2	W1P5I3	SELML	D8RTY5	1	1	1	1	1	1	0.27283	0.306035	0.205364	Plants	0.0332051	True
32254	normal	normal	AMBTC	W1PWY2	W1PC14	SELML	D8RTY5	1	1	1	1	1	1	0.27283	0.30107	0.205364	Plants	0.0282397	True
32263	normal	normal	AMBTC	W1PG76	U5CYZ9	SELML	D8SXI7	-1	1	1	1	-1	1	0.365437	0.206901	0.0629446	Plants	-0.158536	True
32263	normal	normal	AMBTC	W1PG76	U5D2D7	SELML	D8SXI7	-1	1	1	1	-1	1	0.365437	0.274497	0.0629446	Plants	-0.0909397	True
32285	normal	normal	AMBTC	W1NPQ7	W1NRF5	SELML	D8SYX7	1	1	-1	1	-1	1	0.363754	0.479806	0.48098	Plants	0.116052	True
32285	normal	normal	AMBTC	W1NPQ7	W1PE31	SELML	D8SYX7	1	1	-1	1	-1	1	0.363754	0.936414	0.48098	Plants	0.572661	True
32285	normal	normal	AMBTC	W1NPQ7	W1NWB0	SELML	D8SYX7	1	1	-1	1	-1	1	0.363754	0.93767	0.48098	Plants	0.573916	True
32285	normal	normal	AMBTC	W1NUJ3	W1P591	SELML	D8RWW5	1	1	1	1	1	1	0.559282	0.616575	0.113647	Plants	0.0572929	True
32285	normal	normal	AMBTC	W1NUJ3	W1Q0A9	SELML	D8RWW5	1	1	1	1	1	1	0.559282	0.497009	0.113647	Plants	-0.062273	True
32285	normal	normal	AMBTC	W1NUJ3	W1PI52	SELML	D8RWW5	-1	1	1	1	-1	1	0.559282	0.42887	0.113647	Plants	-0.130413	True
32285	normal	normal	AMBTC	W1NUJ3	W1PCE1	SELML	D8RWW5	-1	1	1	1	-1	1	0.559282	0.801628	0.113647	Plants	0.242346	True
32285	normal	normal	AMBTC	W1NUJ3	W1PC60	SELML	D8RWW5	-1	1	1	1	-1	1	0.559282	0.701789	0.113647	Plants	0.142506	True
32285	normal	normal	AMBTC	W1NUJ3	W1Q0I9	SELML	D8RWW5	-1	1	1	1	-1	1	0.559282	0.744641	0.113647	Plants	0.185359	True
32285	normal	normal	AMBTC	W1NUJ3	W1Q0A2	SELML	D8RWW5	-1	1	1	1	-1	1	0.559282	0.889732	0.113647	Plants	0.330449	True
32285	normal	normal	AMBTC	W1NUJ3	W1NJX9	SELML	D8RWW5	-1	1	1	1	-1	1	0.559282	0.486559	0.113647	Plants	-0.0727239	True
32285	normal	normal	AMBTC	W1NUJ3	W1P5Y9	SELML	D8RWW5	-1	1	1	1	-1	1	0.559282	0.759087	0.113647	Plants	0.199805	True
32285	normal	normal	AMBTC	W1NUJ3	W1NWW2	SELML	D8RWW5	-1	1	1	1	-1	1	0.559282	0.458663	0.113647	Plants	-0.100619	True
32285	normal	normal	AMBTC	W1NUJ3	W1PSV1	SELML	D8RWW5	1	1	1	1	1	1	0.559282	0.406097	0.113647	Plants	-0.153186	True
32285	normal	normal	AMBTC	W1NUJ3	W1NJ97	SELML	D8RWW5	-1	1	1	1	-1	1	0.559282	0.639361	0.113647	Plants	0.0800782	True
32285	normal	normal	AMBTC	W1NUJ3	W1PXX9	SELML	D8RWW5	-1	1	1	1	-1	1	0.559282	0.484714	0.113647	Plants	-0.0745686	True
32295	normal	normal	AMBTC	W1NSB9	W1NDK4	SELML	D8RXZ3	-1	1	-1	1	1	1	0.81892	0.281217	0.580501	Plants	-0.537703	True
32295	normal	normal	AMBTC	W1NSB9	W1Q124	SELML	D8RXZ3	1	1	-1	1	-1	1	0.81892	0.685211	0.580501	Plants	-0.133709	True
32295	normal	normal	AMBTC	W1PKS2	U5D4B9	SELML	D8RGM4	1	1	1	1	1	1	0.764718	0.580587	0.178591	Plants	-0.184131	True
32295	normal	normal	AMBTC	W1PKS2	U5DCI2	SELML	D8RGM4	1	1	1	1	1	1	0.764718	0.605161	0.178591	Plants	-0.159557	True
32295	normal	normal	AMBTC	W1PKS2	U5DAT0	SELML	D8RGM4	1	1	1	1	1	1	0.764718	0.423933	0.178591	Plants	-0.340785	True
32295	normal	normal	AMBTC	W1PKS2	W1P1M6	SELML	D8RGM4	1	1	1	1	1	1	0.764718	0.496159	0.178591	Plants	-0.26856	True
32295	normal	normal	AMBTC	W1PKS2	W1NLD5	SELML	D8RGM4	-1	1	1	1	-1	1	0.764718	0.502167	0.178591	Plants	-0.262551	True
32295	normal	normal	AMBTC	W1PKS2	W1PZU8	SELML	D8RGM4	1	1	1	1	1	1	0.764718	0.371597	0.178591	Plants	-0.393121	True
32295	normal	normal	AMBTC	W1PKS2	W1PD51	SELML	D8RGM4	1	1	1	1	1	1	0.764718	0.224974	0.178591	Plants	-0.539744	True
32295	normal	normal	AMBTC	W1PKS2	W1P7D2	SELML	D8RGM4	1	1	1	1	1	1	0.764718	0.336098	0.178591	Plants	-0.42862	True
32343	normal	normal	AMBTC	W1NTL0	W1PA03	SELML	D8RBK1	1	1	1	1	1	1	0.278638	0.252909	0.0945011	Plants	-0.0257291	True
32343	normal	normal	AMBTC	U5D2A6	W1NE00	SELML	D8QX96	1	1	1	1	1	1	0.271201	0.276661	0.120573	Plants	0.00545956	True
32343	normal	normal	AMBTC	U5D2A6	W1NEJ0	SELML	D8QX96	1	1	1	1	1	1	0.271201	0.554959	0.120573	Plants	0.283758	True
32343	normal	normal	AMBTC	U5D2A6	W1NFZ8	SELML	D8QX96	-1	1	1	1	-1	1	0.271201	0.317328	0.120573	Plants	0.0461271	True
32370	normal	normal	AMBTC	W1PXX8	W1PNU2	SELML	D8SND1	-1	1	1	1	-1	1	0.677096	0.663341	0.185206	Plants	-0.0137544	True
32370	normal	normal	AMBTC	U5DAE7	W1NFF3	SELML	D8SRS5	1	1					0.851387	0.564555		Plants	-0.286833	True
32370	normal	normal	AMBTC	U5DAE7	U5DBA9	SELML	D8SRS5	1	1					0.851387	0.488771		Plants	-0.362616	True
32370	normal	normal	AMBTC	U5DAE7	W1Q024	SELML	D8SRS5	1	1					0.851387	0.706817		Plants	-0.14457	True
32370	normal	normal	AMBTC	W1PIK3	W1P7H9	SELML	D8S4U9	-1	1	-1	1	1	1	0.730273	0.602075	0.293721	Plants	-0.128198	True
32370	normal	normal	AMBTC	W1PIK3	W1P9A7	SELML	D8S4U9	-1	1	-1	1	1	1	0.730273	0.667968	0.293721	Plants	-0.0623045	True
32370	normal	normal	AMBTC	W1PIK3	W1PB67	SELML	D8S4U9	1	1	-1	1	-1	1	0.730273	0.371881	0.293721	Plants	-0.358392	True
32370	normal	normal	AMBTC	W1PIK3	U5CUF3	SELML	D8S4U9	1	1	-1	1	-1	1	0.730273	0.718656	0.293721	Plants	-0.0116169	True
32370	normal	normal	AMBTC	W1PIK3	W1PGV8	SELML	D8S4U9	-1	1	-1	1	1	1	0.730273	0.675584	0.293721	Plants	-0.0546891	True
32370	normal	normal	AMBTC	W1NZ74	W1NMH1	SELML	D8SY28	-1	1	-1	1	1	1	0.528389	0.712682	0.415032	Plants	0.184292	True
32382	normal	normal	AMBTC	W1P0M5	W1PI61	SELML	D8T9T3	1	1	1	1	1	1	0.626007	0.622163	0.255627	Plants	-0.00384421	True
32382	normal	normal	AMBTC	W1P0M5	W1PDG2	SELML	D8T9T3	1	1	1	1	1	1	0.626007	0.383155	0.255627	Plants	-0.242852	True
32382	normal	normal	AMBTC	W1P0M5	U5DGC3	SELML	D8T9T3	1	1	1	1	1	1	0.626007	0.625548	0.255627	Plants	-0.000459263	True
32401	normal	normal	AMBTC	W1PJ18	W1PJ23	SELML	D8S546	1	1	-1	1	-1	1	0.837864	0.784308	0.0486257	Plants	-0.0535567	True
32440	normal	normal	AMBTC	W1PKL0	W1PK26	SELML	D8SWQ6	-1	1	-1	1	1	1	0.348434	0.381322	0.290292	Plants	0.0328885	True
32444	normal	normal	AMBTC	W1PUW8	U5CS65	SELML	D8R007	-1	1	1	1	-1	1	0.670793	0.762978	0.257514	Plants	0.0921851	True
32467	normal	normal	AMBTC	W1PGG2	W1PXD1	SELML	D8RZH4	-1	1	1	1	-1	1	0.518206	0.457954	0.131567	Plants	-0.0602518	True
32467	normal	normal	AMBTC	W1NMM2	W1NUQ9	SELML	D8R6J6	1	1	-1	1	-1	1	0.884957	0.937867	0.745449	Plants	0.0529092	True
32467	normal	normal	AMBTC	W1PVC7	W1PHY5	SELML	D8S2M3	-1	1	1	1	-1	1	0.762136	0.815159	0.37475	Plants	0.0530227	True
32467	normal	normal	AMBTC	W1PVC7	U5DD11	SELML	D8S2M3	-1	1	1	1	-1	1	0.762136	0.901917	0.37475	Plants	0.13978	True
32468	normal	normal	AMBTC	W1P6K6	U5DD01	SELML	D8QY71	1	1	1	1	1	1	0.543499	0.902291	0.702908	Plants	0.358792	True
32487	normal	normal	AMBTC	W1PQF9	W1PPR5	SELML	D8QPI8	1	1	-1	1	-1	1	0.350238	0.747478	0.0915668	Plants	0.397241	True
33021	normal	normal	AMBTC	W1P1L2	W1P731	SELML	D8QZ20	-1	1	1	1	-1	1	0.494172	0.430604	0.207495	Plants	-0.0635676	True
33021	normal	normal	AMBTC	W1P1L2	W1NV32	SELML	D8QZ20	-1	1	1	1	-1	1	0.494172	0.546812	0.207495	Plants	0.0526398	True
33021	normal	normal	AMBTC	W1P1L2	W1NLY0	SELML	D8QZ20	1	1	1	1	1	1	0.494172	0.347322	0.207495	Plants	-0.146849	True
33021	normal	normal	AMBTC	W1NE67	W1NYR4	SELML	D8RUP8			1	1			0.343775		0.374575	Plants		True
33021	normal	normal	AMBTC	W1NYV6	W1NZL7	SELML	D8QR96	1	1	-1	1	-1	1	0.949698	0.984767	0.50498	Plants	0.0350693	True
33021	normal	normal	AMBTC	W1NYV6	W1PJ47	SELML	D8QR96	1	1	-1	1	-1	1	0.949698	0.780429	0.50498	Plants	-0.169269	True
33021	normal	normal	AMBTC	W1NYV6	W1P7U0	SELML	D8QR96	-1	1	-1	1	1	1	0.949698	0.746136	0.50498	Plants	-0.203561	True
33021	normal	normal	AMBTC	U5D9C1	U5DFN7	SELML	D8SIZ8	1	1	1	1	1	1	0.983821	0.705064	0.47628	Plants	-0.278758	True
33021	normal	normal	AMBTC	U5D9C1	W1NF54	SELML	D8SIZ8	1	1	1	1	1	1	0.983821	0.760904	0.47628	Plants	-0.222918	True
33021	normal	normal	AMBTC	U5D9C1	W1PHC9	SELML	D8SIZ8	1	1	1	1	1	1	0.983821	0.582265	0.47628	Plants	-0.401556	True
33021	normal	normal	AMBTC	U5D9C1	W1Q0C2	SELML	D8SIZ8	1	1	1	1	1	1	0.983821	0.779907	0.47628	Plants	-0.203915	True
33021	normal	normal	AMBTC	U5D9C1	W1NEA6	SELML	D8SIZ8	1	1	1	1	1	1	0.983821	0.88828	0.47628	Plants	-0.0955414	True
33021	normal	normal	AMBTC	U5D9C1	W1PH65	SELML	D8SIZ8	1	1	1	1	1	1	0.983821	0.521749	0.47628	Plants	-0.462073	True
33021	normal	normal	AMBTC	U5D9C1	W1NE01	SELML	D8SIZ8	1	1	1	1	1	1	0.983821	0.99151	0.47628	Plants	0.0076887	True
33021	normal	normal	AMBTC	U5D9C1	W1NJE3	SELML	D8SIZ8	1	1	1	1	1	1	0.983821	0.50853	0.47628	Plants	-0.475291	True
33044	normal	normal	AMBTC	W1P0X5	W1NVC1	SELML	D8RCA6	1	1	1	1	1	1	0.627445	0.845926	0.252418	Plants	0.218481	True
33044	normal	normal	AMBTC	W1P0X5	W1P0Y1	SELML	D8RCA6	1	1	1	1	1	1	0.627445	0.298157	0.252418	Plants	-0.329288	True
33044	normal	normal	AMBTC	W1P0X5	W1NGE6	SELML	D8RCA6	1	1	1	1	1	1	0.627445	0.407677	0.252418	Plants	-0.219768	True
33044	normal	normal	AMBTC	W1P0X5	W1P1Y9	SELML	D8RCA6	1	1	1	1	1	1	0.627445	0.5979	0.252418	Plants	-0.0295447	True
33044	normal	normal	AMBTC	W1NZY0	W1PEF0	SELML	D8QR06			-1	1			0.550262		0.237705	Plants		True
33052	normal	normal	AMBTC	W1NJD5	W1PXB3	SELML	D8RHD9	1	1	-1	1	-1	1	0.831273	0.715401	0.277784	Plants	-0.115872	True
33057	normal	normal	AMBTC	W1PBR5	W1NSB5	SELML	D8R9E5	1	1	1	1	1	1	0.646495	0.774504	0.49368	Plants	0.128009	True
33057	normal	normal	AMBTC	W1PBR5	U5D747	SELML	D8R9E5	1	1	1	1	1	1	0.646495	0.732392	0.49368	Plants	0.0858962	True
33057	normal	normal	AMBTC	W1PBR5	W1NZ03	SELML	D8R9E5	1	1	1	1	1	1	0.646495	0.769579	0.49368	Plants	0.123084	True
33057	normal	normal	AMBTC	W1PBR5	W1NDT1	SELML	D8R9E5	-1	1	1	1	-1	1	0.646495	0.68952	0.49368	Plants	0.0430246	True
33057	normal	normal	AMBTC	W1PBR5	W1NI94	SELML	D8R9E5	1	1	1	1	1	1	0.646495	0.807562	0.49368	Plants	0.161067	True
33057	normal	normal	AMBTC	W1PBR5	U5D551	SELML	D8R9E5	1	1	1	1	1	1	0.646495	0.51876	0.49368	Plants	-0.127735	True
33057	normal	normal	AMBTC	W1PBR5	W1PSK8	SELML	D8R9E5	1	1	1	1	1	1	0.646495	0.688353	0.49368	Plants	0.0418579	True
33077	normal	normal	AMBTC	W1NUX6	W1NVF2	SELML	D8R0N6	-1	1	1	1	-1	1	0.194437	0.486014	0.165266	Plants	0.291577	True
33077	normal	normal	AMBTC	W1NUX6	W1NV33	SELML	D8R0N6	-1	1	1	1	-1	1	0.194437	0.307072	0.165266	Plants	0.112635	True
33077	normal	normal	AMBTC	W1NUX6	W1P8J2	SELML	D8R0N6	-1	1	1	1	-1	1	0.194437	0.47012	0.165266	Plants	0.275682	True
33077	normal	normal	AMBTC	W1NUX6	W1P1S3	SELML	D8R0N6	1	1	1	1	1	1	0.194437	0.44681	0.165266	Plants	0.252373	True
33083	normal	normal	AMBTC	W1PTU7	U5DAA3	SELML	D8SY11	1	1	-1	1	-1	1	0.28608	0.44389	0.448288	Plants	0.15781	True
33083	normal	normal	AMBTC	W1PTU7	U5DAD6	SELML	D8SY11	-1	1	-1	1	1	1	0.28608	0.452647	0.448288	Plants	0.166567	True
33083	normal	normal	AMBTC	W1PTU7	U5D4D6	SELML	D8SY11	-1	1	-1	1	1	1	0.28608	0.54415	0.448288	Plants	0.25807	True
33095	normal	normal	AMBTC	W1NPF7	W1PFF3	SELML	D8S920	1	1	-1	1	-1	1	0.533943	0.320592	0.102285	Plants	-0.213351	True
33098	normal	normal	AMBTC	W1P900	U5DH64	SELML	D8QX21	1	1	1	1	1	1	0.535286	0.308176	0.155699	Plants	-0.22711	True
33098	normal	normal	AMBTC	W1P900	W1P4N7	SELML	D8QX21	1	1	1	1	1	1	0.535286	0.727858	0.155699	Plants	0.192572	True
33101	normal	normal	AMBTC	W1NM13	W1PV89	SELML	D8S3W9	1	1	-1	1	-1	1	0.521159	0.460328	0.164378	Plants	-0.0608312	True
33101	normal	normal	AMBTC	W1NM13	W1NH54	SELML	D8S3W9	1	1	-1	1	-1	1	0.521159	0.424726	0.164378	Plants	-0.0964331	True
33108	normal	normal	AMBTC	W1PTD9	U5D155	SELML	D8RGA5	-1	1	-1	1	1	1	0.385049	0.82595	0.477587	Plants	0.440901	True
33108	normal	normal	AMBTC	W1PTD9	W1NDG5	SELML	D8RGA5	-1	1	-1	1	1	1	0.385049	0.539004	0.477587	Plants	0.153955	True
33108	normal	normal	AMBTC	W1PTD9	U5CWB6	SELML	D8RGA5	-1	1	-1	1	1	1	0.385049	0.887833	0.477587	Plants	0.502785	True
33109	normal	normal	AMBTC	U5DDS7	W1NEV1	SELML	D8RSX5	1	1	1	1	1	1	0.599238	0.805219	0.481111	Plants	0.205982	True
33109	normal	normal	AMBTC	U5DDS7	W1P8P1	SELML	D8RSX5	1	1	1	1	1	1	0.599238	0.800659	0.481111	Plants	0.201421	True
33122	normal	normal	AMBTC	W1PWH4	W1PI21	SELML	D8SRZ4					-1	1	0.975992	0.587921	0.801439	Plants	-0.388072	True
33122	normal	normal	AMBTC	W1PTB7	W1PW87	SELML	D8QRW1	1	1	-1	1	-1	1	0.754934	0.760686	0.585807	Plants	0.00575186	True
33124	normal	normal	AMBTC	W1PHT5	W1PFQ1	SELML	D8SHZ7	-1	1	-1	1	1	1	0.65276	0.794903	0.333483	Plants	0.142144	True
33124	normal	normal	AMBTC	W1PHT5	W1P6T8	SELML	D8SHZ7	1	1	-1	1	-1	1	0.65276	0.219817	0.333483	Plants	-0.432943	True
33132	normal	normal	AMBTC	W1NUL7	W1PJM0	SELML	D8RS53	1	1	-1	1	-1	1	0.565231	0.671791	0.536859	Plants	0.10656	True
33132	normal	normal	AMBTC	W1NUL7	W1PZJ8	SELML	D8RS53	-1	1	-1	1	1	1	0.565231	0.615117	0.536859	Plants	0.0498856	True
33132	normal	normal	AMBTC	W1NUL7	U5D0Q0	SELML	D8RS53	-1	1	-1	1	1	1	0.565231	0.686085	0.536859	Plants	0.120854	True
33133	normal	normal	AMBTC	W1PFL6	W1PFU4	SELML	D8R1E9	1	1	-1	1	-1	1	0.464059	0.80116	0.192678	Plants	0.337101	True
33136	normal	normal	AMBTC	W1PLP2	W1P3J0	SELML	D8RTT1	1	1	1	1	1	1	0.545436	0.221104	0.157558	Plants	-0.324332	True
33136	normal	normal	AMBTC	W1PLP2	U5D4M2	SELML	D8RTT1	1	1	1	1	1	1	0.545436	0.661998	0.157558	Plants	0.116562	True
33142	normal	normal	AMBTC	W1P1R1	W1P4C4	SELML	D8RD18	1	1	-1	1	-1	1	0.597113	0.63568	0.327189	Plants	0.0385669	True
33142	normal	normal	AMBTC	W1P1R1	W1NLP7	SELML	D8RD18	1	1	-1	1	-1	1	0.597113	0.750554	0.327189	Plants	0.153441	True
33146	normal	normal	AMBTC	W1P0R5	W1PAE8	SELML	D8RKB6	1	1	1	1	1	1	0.313024	0.732156	0.181916	Plants	0.419132	True
33155	normal	normal	AMBTC	W1NTS0	W1PRR9	SELML	D8S4H2	1	1	-1	1	-1	1	0.653206	0.770348	0.506371	Plants	0.117143	True
33155	normal	normal	AMBTC	W1NTS0	W1PXM1	SELML	D8S4H2	-1	1	-1	1	1	1	0.653206	0.505641	0.506371	Plants	-0.147564	True
33155	normal	normal	AMBTC	W1NTS0	W1PC22	SELML	D8S4H2	-1	1	-1	1	1	1	0.653206	0.685849	0.506371	Plants	0.0326438	True
33155	normal	normal	AMBTC	W1NTS0	W1NGD6	SELML	D8S4H2	-1	1	-1	1	1	1	0.653206	0.572035	0.506371	Plants	-0.0811705	True
33159	normal	normal	AMBTC	W1NTL7	W1NM34	SELML	D8SQY0	1	1	1	1	1	1	0.317844	0.862246	0.211127	Plants	0.544403	True
33159	normal	normal	AMBTC	W1NTL7	W1PZE5	SELML	D8SQY0	1	1	1	1	1	1	0.317844	0.281962	0.211127	Plants	-0.0358816	True
33159	normal	normal	AMBTC	W1NTL7	W1P6U1	SELML	D8SQY0	-1	1	1	1	-1	1	0.317844	0.653645	0.211127	Plants	0.335801	True
33167	normal	normal	AMBTC	W1PR39	W1PIA8	SELML	D8QX06	-1	1	1	1	-1	1	0.318375	0.620862	0.175163	Plants	0.302487	True
33172	normal	normal	AMBTC	W1PVE9	W1PI73	SELML	D8SD01	-1	1	1	1	-1	1	0.485406	0.350154	0.0967451	Plants	-0.135251	True
33172	normal	normal	AMBTC	W1PVE9	U5CYY6	SELML	D8SD01	1	1	1	1	1	1	0.485406	0.639531	0.0967451	Plants	0.154125	True
33177	normal	normal	AMBTC	U5CSH0	U5CXA8	SELML	D8RQL2	-1	1	1	1	-1	1	0.628887	0.422118	0.179192	Plants	-0.206769	True
33178	normal	normal	AMBTC	W1P5U5	W1PT31	SELML	D8SXD5	-1	1	1	1	-1	1	0.314392	0.599063	0.160295	Plants	0.284671	True
33179	normal	normal	AMBTC	W1NFD0	W1NP71	SELML	D8R599	1	1	1	1	1	1	0.567259	0.386621	0.49171	Plants	-0.180638	True
33180	normal	normal	AMBTC	Q70Y07	W1PVS8	SELML	C7B2K3					1	1		0.590855	0.720085	Plants		True
33181	normal	normal	AMBTC	W1P7I9	W1P327	SELML	D8T8Y9	1	1	1	1	1	1	0.543382	0.728338	0.208776	Plants	0.184956	True
33181	normal	normal	AMBTC	W1P7I9	U5DCV5	SELML	D8T8Y9	1	1	1	1	1	1	0.543382	0.860277	0.208776	Plants	0.316895	True
33184	normal	normal	AMBTC	W1NXA8	W1PPE8	SELML	D8RQE2								0.516123		Plants		True
33184	normal	normal	AMBTC	U5D5N6	W1PF86	SELML	D8RFC9	-1	1	-1	1	1	1	0.939242	0.984912	0.521769	Plants	0.0456698	True
33191	normal	normal	AMBTC	W1P0F2	W1NH41	SELML	D8S9G2							0.994797			Plants		True
33193	normal	normal	AMBTC	W1P8K0	U5D4S4	SELML	D8S0H7	1	1	1	1	1	1	0.319289	0.510037	0.043374	Plants	0.190748	True
33193	normal	normal	AMBTC	W1P8K0	U5CX72	SELML	D8S0H7	1	1	1	1	1	1	0.319289	0.597588	0.043374	Plants	0.278299	True
33199	normal	normal	AMBTC	U5DF23	W1PUI8	SELML	D8RL17	1	1	1	1	1	1	0.441107	0.689281	0.0948522	Plants	0.248174	True
33199	normal	normal	AMBTC	U5DF23	W1PGL7	SELML	D8RL17	1	1	1	1	1	1	0.441107	0.457034	0.0948522	Plants	0.0159265	True
33199	normal	normal	AMBTC	U5DF23	U5DGD2	SELML	D8RL17	1	1	1	1	1	1	0.441107	0.287282	0.0948522	Plants	-0.153825	True
33199	normal	normal	AMBTC	U5DF23	W1PMS5	SELML	D8RL17	1	1	1	1	1	1	0.441107	0.442937	0.0948522	Plants	0.00182968	True
33203	normal	normal	AMBTC	U5CYH5	W1P9K6	SELML	D8R4R4	1	1	-1	1	-1	1	0.712537	0.564477	0.806611	Plants	-0.148059	True
33203	normal	normal	AMBTC	U5CYH5	W1PGU4	SELML	D8R4R4	1	1	-1	1	-1	1	0.712537	0.851103	0.806611	Plants	0.138566	True
33227	normal	normal	AMBTC	W1PMW8	U5DH17	SELML	D8SSR0			-1	1			0.866379		0.610143	Plants		True
33237	normal	normal	AMBTC	W1P3D0	W1P6P2	SELML	D8R738	1	1	1	1	1	1	0.622182	0.735109	0.329053	Plants	0.112927	True
33254	normal	normal	AMBTC	U5D0A9	W1NWA0	SELML	D8T6M3	1	1	-1	1	-1	1	0.19674	0.373941	0.147851	Plants	0.177201	True
33264	normal	normal	AMBTC	W1PFG1	W1PHE0	SELML	D8SJK4	1	1	-1	1	-1	1	0.921416	0.547244	0.354032	Plants	-0.374172	True
33270	normal	normal	AMBTC	W1Q082	W1Q085	SELML	D8RA30	1	1	1	1	1	1	0.433076	0.497134	0.069464	Plants	0.0640584	True
33271	normal	normal	AMBTC	W1NYL4	W1PYD0	SELML	D8ST65	1	1	1	1	1	1	0.324814	0.658611	0.137476	Plants	0.333797	True
33284	normal	normal	AMBTC	W1P9C5	W1PJG6	SELML	D8RST2	-1	1	1	1	-1	1	0.22038	0.402955	0.22005	Plants	0.182575	True
33286	normal	normal	AMBTC	U5DHL6	W1P5B3	SELML	D8RRR8	-1	1	1	1	-1	1	0.68889	0.92893	0.707317	Plants	0.240039	True
33287	normal	normal	AMBTC	U5CNY6	W1PBI2	SELML	D8R5J8	1	1	1	1	1	1	0.589731	0.721038	0.0800866	Plants	0.131307	True
33294	normal	normal	AMBTC	U5D341	W1PW89	SELML	D8QP57	1	1	-1	1	-1	1	0.865282	0.520619	0.889174	Plants	-0.344664	True
33294	normal	normal	AMBTC	U5D341	W1PGF7	SELML	D8QP57	1	1	-1	1	-1	1	0.865282	0.647804	0.889174	Plants	-0.217479	True
33304	normal	normal	AMBTC	W1PNM7	U5D1I7	SELML	D8SFY0	-1	1	1	1	-1	1	0.278355	0.308176	0.0925833	Plants	0.0298208	True
33318	normal	normal	AMBTC	U5CXG0	U5DEU4	SELML	D8T0I0	1	1	-1	1	-1	1	0.455076	0.710453	0.42331	Plants	0.255377	True
33321	normal	normal	AMBTC	W1P5M3	W1PD60	SELML	D8SJC9	-1	1	1	1	-1	1	0.454435	0.750769	0.712018	Plants	0.296334	True
33344	normal	normal	AMBTC	W1NPT6	U5CRR7	SELML	D8SND2	1	1	-1	1	-1	1	0.191409	0.334315	0.178204	Plants	0.142906	True
33356	normal	normal	AMBTC	W1PV84	U5D3Z9	SELML	D8S171	1	1	-1	1	-1	1	0.522352	0.582224	0.339327	Plants	0.0598717	True
33372	normal	normal	AMBTC	W1PE26	W1NW19	SELML	D8TBY1	1	1	1	1	1	1	0.317909	0.413111	0.0657815	Plants	0.0952023	True
33388	normal	normal	AMBTC	W1NRB7	W1Q0D9	SELML	D8QW80	-1	1	-1	1	1	1	0.861206	0.586386	0.138742	Plants	-0.27482	True
33391	normal	normal	AMBTC	W1P5D5	Q70XY9	SELML	C7B2G7			1	1			0.717862		0.695939	Plants		True
33401	normal	normal	AMBTC	U5CRP2	W1P8G0	SELML	D8S2R3	-1	1	-1	1	1	1	0.607347	0.288453	0.0643775	Plants	-0.318894	True
33403	normal	normal	AMBTC	W1NM86	W1NLU3	SELML	D8S266	1	1	1	1	1	1	0.182422	0.960227	0.0661638	Plants	0.777805	True
33405	normal	normal	AMBTC	W1NV07	W1PDU0	SELML	D8RTF3	-1	1	-1	1	1	1	0.264417	0.13558	0.0873494	Plants	-0.128837	True
33405	normal	normal	AMBTC	W1NV07	W1NQC2	SELML	D8RTF3	1	1	-1	1	-1	1	0.264417	0.404411	0.0873494	Plants	0.139994	True
33405	normal	normal	AMBTC	W1NV07	W1NID2	SELML	D8RTF3	1	1	-1	1	-1	1	0.264417	0.322183	0.0873494	Plants	0.0577655	True
33415	normal	normal	AMBTC	U5DG44	U5D5J7	SELML	D8T8L1	-1	1	-1	1	1	1	0.68597	0.313351	0.144917	Plants	-0.372618	True
33417	normal	normal	AMBTC	U5D7D4	U5D603	SELML	D8S5N5	1	1	1	1	1	1	0.188754	0.428625	0.0912671	Plants	0.239871	True
33417	normal	normal	AMBTC	U5D7D4	W1PA84	SELML	D8S5N5	1	1	1	1	1	1	0.188754	0.578591	0.0912671	Plants	0.389836	True
33431	normal	normal	AMBTC	W1NT18	W1PDC1	SELML	D8RVK9	-1	1	1	1	-1	1	0.556399	0.509058	0.473662	Plants	-0.0473403	True
33432	normal	normal	AMBTC	W1PUU5	W1NDH8	SELML	D8STY5	1	1	1	1	1	1	0.309305	0.377389	0.0858297	Plants	0.0680838	True
33433	normal	normal	AMBTC	U5D3M4	W1PEK2	SELML	D8RWR5	1	1	-1	1	-1	1	0.903029	0.819904	0.47408	Plants	-0.0831252	True
33470	normal	normal	AMBTC	W1PG43	W1PHD7	SELML	D8R4E3	1	1	1	1	1	1	0.69784	0.85312	0.617973	Plants	0.15528	True
33470	normal	normal	AMBTC	W1P5K6	U5DHT9	SELML	D8TCE8	1	1	1	1	1	1	0.81911	0.556242	0.729038	Plants	-0.262867	True
33470	normal	normal	AMBTC	W1P5K6	U5DIS5	SELML	D8TCE8	1	1	1	1	1	1	0.81911	0.965677	0.729038	Plants	0.146568	True
33476	normal	normal	AMBTC	U5CZB6	W1PC56	SELML	D8QPH6	-1	1	-1	1	1	1	0.42508	0.475344	0.174924	Plants	0.050264	True
33493	normal	normal	AMBTC	W1PMM7	W1PU42	SELML	D8QXJ5	-1	1	-1	1	1	1	0.683791	0.476955	0.14501	Plants	-0.206836	True
33509	normal	normal	AMBTC	W1NLG6	W1P2N9	SELML	D8R3H1	1	1	1	1	1	1	0.664524	0.255685	0.930229	Plants	-0.408839	True
33512	normal	normal	AMBTC	W1NLY4	U5DAB8	SELML	D8RS49	1	1	-1	1	-1	1	0.647758	0.537023	0.108524	Plants	-0.110734	True
33566	normal	normal	AMBTC	W1Q034	W1Q0K3	SELML	D8TF90	-1	1	-1	1	1	1	0.501503	0.245115	0.539109	Plants	-0.256388	True
33573	normal	normal	AMBTC	W1PG87	W1NJ75	SELML	D8R814	1	1	1	1	1	1	0.484298	0.419889	0.388988	Plants	-0.064409	True
33573	normal	normal	AMBTC	W1PG87	W1NZI4	SELML	D8R814	1	1	1	1	1	1	0.484298	0.943929	0.388988	Plants	0.459631	True
33595	normal	normal	AMBTC	W1PVW3	U5D832	SELML	D8RDX9	-1	1	1	1	-1	1	0.759401	0.764761	0.23665	Plants	0.0053599	True
33596	normal	normal	AMBTC	U5D8A5	U5D865	SELML	D8R831	1	1	1	1	1	1	0.25074	0.392722	0.159149	Plants	0.141983	True
33598	normal	normal	AMBTC	W1NN15	W1P257	SELML	D8RBV2	1	1	1	1	1	1	0.30015	0.219888	0.145083	Plants	-0.0802614	True
33605	normal	normal	AMBTC	U5D1B2	W1PBS5	SELML	D8RTC5	1	1	1	1	1	1	0.419636	0.828911	0.129598	Plants	0.409275	True
33625	normal	normal	AMBTC	W1PXZ2	W1NSQ9	SELML	D8QR32	1	1	1	1	1	1	0.257629	0.346389	0.184622	Plants	0.0887603	True
33649	normal	normal	AMBTC	W1NHW7	W1PHZ6	SELML	D8RXB1	1	1	-1	1	-1	1	0.738484	0.51981	0.0966387	Plants	-0.218674	True
33670	normal	normal	AMBTC	U5CY19	W1PIC4	SELML	D8R4X2	-1	1	1	1	-1	1	0.454562	0.187194	0.0969241	Plants	-0.267369	True
33698	normal	normal	AMBTC	W1NWJ2	W1NLS8	SELML	D8S9B9	-1	1	1	1	-1	1	0.369444	0.487932	0.469204	Plants	0.118487	True
33703	normal	normal	AMBTC	W1NIK8	W1NJG9	SELML	D8QMV9	-1	1	-1	1	1	1	0.282264	0.712794	0.224848	Plants	0.43053	True
33709	normal	normal	AMBTC	W1PY93	W1NM38	SELML	D8SZT4	1	1	1	1	1	1	0.361794	0.498294	0.112121	Plants	0.136501	True
33728	normal	normal	AMBTC	W1P0P6	U5D386	SELML	D8T6B2	1	1	-1	1	-1	1	0.361772	0.625236	0.18496	Plants	0.263464	True
33734	normal	normal	AMBTC	W1NJ00	W1NLF6	SELML	D8RBU1	1	1	-1	1	-1	1	0.628431	0.480788	0.42782	Plants	-0.147643	True
33734	normal	normal	AMBTC	W1NJ00	W1PG82	SELML	D8RBU1	1	1	-1	1	-1	1	0.628431	0.532942	0.42782	Plants	-0.0954886	True
33736	normal	normal	AMBTC	W1PW35	W1NTS6	SELML	D8QWT3	1	1	-1	1	-1	1	0.343529	0.482065	0.241645	Plants	0.138535	True
33739	normal	normal	AMBTC	W1P8Q2	W1PW75	SELML	D8R764	-1	1	1	1	-1	1	0.420676	0.5385	0.114087	Plants	0.117824	True
33740	normal	normal	AMBTC	W1NIJ0	W1P8W6	SELML	D8QMI3	1	1	-1	1	-1	1	0.364364	0.411519	0.130812	Plants	0.0471559	True
33779	normal	normal	AMBTC	W1NZ78	W1NZI5	SELML	D8R2G0	-1	1	-1	1	1	1	0.690285	0.505904	0.445775	Plants	-0.184381	True
33779	normal	normal	AMBTC	W1NZ78	W1NVW0	SELML	D8R2G0	1	1	-1	1	-1	1	0.690285	0.509828	0.445775	Plants	-0.180458	True
33780	normal	normal	AMBTC	W1NK70	U5DF40	SELML	D8SNL2					1	1		0.238587	0.0841721	Plants		True
33787	normal	normal	AMBTC	U5DAP3	U5D2N7	SELML	D8STB1	-1	1	1	1	-1	1	0.310353	0.401282	0.323962	Plants	0.0909293	True
33826	normal	normal	AMBTC	W1PCE3	U5CWR5	SELML	D8RR13	1	1	1	1	1	1	0.342157	0.44715	0.0547351	Plants	0.104993	True
33827	normal	normal	AMBTC	W1NHX7	U5D165	SELML	D8QZ18	1	1	1	1	1	1	0.334595	0.342234	0.0894178	Plants	0.00763851	True
33828	normal	normal	AMBTC	W1PYT7	U5D430	SELML	D8TDF9	1	1	-1	1	-1	1	0.376747	0.145055	0.034325	Plants	-0.231692	True
33829	normal	normal	AMBTC	W1NYY0	W1NHP0	SELML	D8RHG3					-1	1	0.747158	0.392979	0.200113	Plants	-0.354179	True
33831	normal	normal	AMBTC	U5DFU3	U5DE25	SELML	D8S523	-1	1	-1	1	1	1	0.359972	0.576203	0.114117	Plants	0.216232	True
33836	normal	normal	AMBTC	W1NHZ2	W1PJY6	SELML	D8QZJ4	-1	1	1	1	-1	1	0.587709	0.721103	0.214148	Plants	0.133394	True
33916	normal	normal	AMBTC	U5D3B3	W1P352	SELML	D8RPY1	-1	1	-1	1	1	1	0.418904	0.538528	0.216882	Plants	0.119624	True
33917	normal	normal	AMBTC	W1PHQ9	U5CZ29	SELML	D8R8X7	1	1	1	1	1	1	0.49927	0.359946	0.167736	Plants	-0.139324	True
33921	normal	normal	AMBTC	W1P588	W1PTX2	SELML	D8RYU8	-1	1	1	1	-1	1	0.431652	0.301051	0.170729	Plants	-0.130601	True
33924	normal	normal	AMBTC	W1PAY7	W1NFF1	SELML	D8R8F1	1	1	-1	1	-1	1	0.763857	0.327945	0.623926	Plants	-0.435912	True
33926	normal	normal	AMBTC	W1NPY3	W1PS07	SELML	D8R7K1	1	1	-1	1	-1	1	0.475068	0.399829	0.132899	Plants	-0.0752395	True
33984	normal	normal	AMBTC	W1PNX3	W1PT39	SELML	D8QZ27	1	1	-1	1	-1	1	0.305061	0.769335	0.0773667	Plants	0.464274	True
34050	normal	normal	AMBTC	W1PEQ8	W1NWU5	SELML	D8SXY9	-1	1	1	1	-1	1	0.235467	0.437964	0.0697838	Plants	0.202497	True
34056	normal	normal	AMBTC	W1PU13	W1P127	SELML	D8TDU0	1	1	1	1	1	1	0.400876	0.643242	0.35454	Plants	0.242365	True
34200	normal	normal	AMBTC	W1PXH6	W1P9A5	SELML	D8SF74	1	1	1	1	1	1	0.372201	0.277392	0.0529467	Plants	-0.094809	True
34360	normal	normal	AMBTC	W1PXB6	W1PHH2	SELML	D8T8W8	-1	1	-1	1	1	1	0.151672	0.548751	0.802605	Plants	0.397079	True
34368	normal	normal	AMBTC	W1PN47	W1NE05	SELML	D8T0Q0	1	1	1	1	1	1	0.296466	0.377573	0.0721511	Plants	0.0811072	True
34376	normal	normal	AMBTC	W1PZL0	W1PRT4	SELML	D8RTC0	1	1	1	1	1	1	0.351249	0.605457	0.127924	Plants	0.254208	True
34449	normal	normal	AMBTC	W1NTC2	U5DBF2	SELML	D8R2A6	1	1	1	1	1	1	0.260698	0.49017	0.0589282	Plants	0.229472	True
34537	normal	normal	AMBTC	W1PU92	W1NTV2	SELML	D8QNJ6	1	1	1	1	1	1	0.644989	0.664428	0.0885497	Plants	0.019439	True
34554	normal	normal	AMBTC	W1NQ47	W1NYP0	SELML	D8SIQ8	-1	1	1	1	-1	1	0.282572	0.217524	0.107967	Plants	-0.0650481	True
34569	normal	normal	AMBTC	U5CSF5	W1NQL7	SELML	D8QY39	-1	1	1	1	-1	1	0.379601	0.662355	0.110979	Plants	0.282754	True
34660	normal	normal	AMBTC	W1PET4	W1PQT6	SELML	D8RJR8	-1	1	-1	1	1	1	0.270786	0.220434	0.0713986	Plants	-0.050352	True
34661	normal	normal	AMBTC	W1PV24	W1PWX3	SELML	D8SKE7	1	1	1	1	1	1	0.321189	0.273593	0.171418	Plants	-0.0475963	True
34665	normal	normal	AMBTC	W1NK34	W1PUY5	SELML	D8RV07	1	1	1	1	1	1	0.730941	0.771182	0.369092	Plants	0.0402413	True
34669	normal	normal	AMBTC	U5DHZ5	U5D3T6	SELML	D8QVB5	1	1	1	1	1	1	0.476338	0.451184	0.259438	Plants	-0.0251539	True
34686	normal	normal	AMBTC	W1PLI0	W1PNP6	SELML	D8SIF6	-1	1	-1	1	1	1	0.419043	0.333695	0.301189	Plants	-0.0853478	True
34949	normal	normal	AMBTC	U5CTA2	W1PI53	SELML	D8QTT5	-1	1	1	1	-1	1	0.310339	0.251995	0.0652845	Plants	-0.0583439	True
35118	normal	normal	AMBTC	W1NRL8	W1PKH1	SELML	D8QV16	1	1	-1	1	-1	1	0.420544	0.421437	0.131318	Plants	0.000892672	True
35410	normal	normal	AMBTC	W1PD65	W1NI68	SELML	D8T800	-1	1	1	1	-1	1	0.440866	0.32645	0.125713	Plants	-0.114416	True
35703	normal	normal	AMBTC	W1P1P8	W1PT50	SELML	D8RPQ1	1	1	1	1	1	1	0.348038	0.49553	0.108925	Plants	0.147492	True
35744	normal	normal	AMBTC	U5D5C2	U5D534	SELML	D8SSW2	1	1	1	1	1	1	0.51765	0.50747	0.303112	Plants	-0.0101806	True
36326	normal	normal	AMBTC	U5D9Y0	U5DBR6	SELML	D8T525	1	1	-1	1	-1	1	0.637072	0.518243	0.722601	Plants	-0.118829	True
36326	normal	normal	AMBTC	U5D9Y0	W1NX32	SELML	D8T525	1	1	-1	1	-1	1	0.637072	0.585105	0.722601	Plants	-0.0519665	True
36766	normal	normal	AMBTC	U5CWU1	W1NW05	SELML	D8S7E8			1	1			0.462525		0.201206	Plants		True
36886	normal	normal	AMBTC	W1NDL6	U5DHH8	SELML	D8R2N5	1	1	1	1	1	1	0.368485	0.257297	0.0316151	Plants	-0.111188	True
36886	normal	normal	AMBTC	W1NDL6	W1PCB0	SELML	D8R2N5	1	1	1	1	1	1	0.368485	0.324459	0.0316151	Plants	-0.044026	True
37612	normal	normal	AMBTC	W1PJ59	W1P0D6	SELML	D8T497	-1	1	-1	1	1	1	0.827014	0.66692	0.333885	Plants	-0.160094	True
37612	normal	normal	AMBTC	W1PJ59	W1PHP7	SELML	D8T497	1	1	-1	1	-1	1	0.827014	0.708362	0.333885	Plants	-0.118652	True
37612	normal	normal	AMBTC	W1PJ59	W1NU74	SELML	D8T497	1	1	-1	1	-1	1	0.827014	0.58662	0.333885	Plants	-0.240394	True
42647	normal	normal	AMBTC	U5CQN3	W1P5X0	SELML	D8RWS2	1	1	-1	1	-1	1	0.373135	0.254319	0.131747	Plants	-0.118816	True
42647	normal	normal	AMBTC	U5CQN3	U5CXW2	SELML	D8RWS2	1	1	-1	1	-1	1	0.373135	0.348205	0.131747	Plants	-0.0249297	True
42647	normal	normal	AMBTC	U5CQN3	W1PEK7	SELML	D8RWS2	-1	1	-1	1	1	1	0.373135	0.278103	0.131747	Plants	-0.0950319	True
42721	normal	normal	AMBTC	W1NR76	W1NFV7	SELML	D8SVP1	1	1	-1	1	-1	1	0.96954	0.541251	0.225716	Plants	-0.428289	True
42721	normal	normal	AMBTC	W1NR76	U5DDV5	SELML	D8SVP1	-1	1	-1	1	1	1	0.96954	0.942645	0.225716	Plants	-0.0268958	True
42721	normal	normal	AMBTC	W1NR76	U5CTZ0	SELML	D8SVP1	1	1	-1	1	-1	1	0.96954	0.613604	0.225716	Plants	-0.355936	True
42743	normal	normal	AMBTC	W1NPI6	W1PG02	SELML	D8SI00	-1	1	-1	1	1	1	0.463546	0.460157	0.4051	Plants	-0.00338814	True
42769	normal	normal	AMBTC	W1P052	U5D4C0	SELML	D8REH3	1	1	1	1	1	1	0.500932	0.612802	0.31143	Plants	0.11187	True
42799	normal	normal	AMBTC	W1NU48	W1PG40	SELML	D8SC11	-1	1	1	1	-1	1	0.441381	0.108804	0.16025	Plants	-0.332577	True
42811	normal	normal	AMBTC	W1NQE9	W1PTF1	SELML	D8RTV0	-1	1	1	1	-1	1	0.409875	0.489992	0.139924	Plants	0.0801168	True
42833	normal	normal	AMBTC	U5CS83	W1P7M4	SELML	D8T2A1	-1	1	1	1	-1	1	0.325984	0.397257	0.195303	Plants	0.0712728	True
42861	normal	normal	AMBTC	W1PHB1	W1PRK0	SELML	D8S9Q9	1	1	-1	1	-1	1	0.220814	0.650646	0.255682	Plants	0.429832	True
42861	normal	normal	AMBTC	W1PHB1	W1NSW6	SELML	D8S9Q9	1	1	-1	1	-1	1	0.220814	0.528523	0.255682	Plants	0.307709	True
42861	normal	normal	AMBTC	W1PHB1	W1NVQ7	SELML	D8S9Q9	-1	1	-1	1	1	1	0.220814	0.581874	0.255682	Plants	0.36106	True
42861	normal	normal	AMBTC	W1PHB1	W1P1C7	SELML	D8S9Q9	-1	1	-1	1	1	1	0.220814	0.212912	0.255682	Plants	-0.00790128	True
42893	normal	normal	AMBTC	W1NK69	W1NJ87	SELML	D8RMU9	1	1	1	1	1	1	0.397426	0.558879	0.151282	Plants	0.161453	True
42946	normal	normal	AMBTC	W1PL06	W1NTD5	SELML	D8RRZ3	1	1	-1	1	-1	1	0.397572	0.866418	0.0961653	Plants	0.468846	True
43009	normal	normal	AMBTC	W1PRJ0	W1PJS9	SELML	D8SQ94	-1	1	1	1	-1	1	0.70265	0.483014	0.170753	Plants	-0.219636	True
43025	normal	normal	AMBTC	W1PAZ2	U5CYW0	SELML	D8RQT3	1	1	1	1	1	1	0.432784	0.44806	0.156641	Plants	0.0152755	True
43029	normal	normal	AMBTC	W1PKL1	W1P639	SELML	D8R302	1	1					0.615754	0.647162		Plants	0.0314081	True
43029	normal	normal	AMBTC	W1PKL1	W1P1F3	SELML	D8R302	-1	1					0.615754	0.992893		Plants	0.377139	True
43039	normal	normal	AMBTC	W1NLE0	W1PEB1	SELML	D8RPH7	1	1	-1	1	-1	1	0.37265	0.684588	0.176674	Plants	0.311938	True
43039	normal	normal	AMBTC	W1NLE0	W1PSS0	SELML	D8RPH7	1	1	-1	1	-1	1	0.37265	0.446714	0.176674	Plants	0.0740635	True
43085	normal	normal	AMBTC	W1NMM7	W1PDN4	SELML	D8TFV9	-1	1	-1	1	1	1	0.600061	0.650539	0.074018	Plants	0.0504772	True
43085	normal	normal	AMBTC	W1NMM7	W1NE88	SELML	D8TFV9	1	1	-1	1	-1	1	0.600061	0.489813	0.074018	Plants	-0.110248	True
43096	normal	normal	AMBTC	U5DJ14	W1NED3	SELML	D8RYK6	1	1	1	1	1	1	0.411116	0.499646	0.133471	Plants	0.0885301	True
43096	normal	normal	AMBTC	W1PU81	W1P4T3	SELML	D8RWW6	-1	1	1	1	-1	1	0.309021	0.383271	0.14603	Plants	0.0742505	True
43116	normal	normal	AMBTC	U5D3X4	W1PBW6	SELML	D8T8U9	1	1	1	1	1	1	0.532426	0.447521	0.239489	Plants	-0.0849055	True
43139	normal	normal	AMBTC	W1PU97	W1NH12	SELML	D8RU55	-1	1	-1	1	1	1	0.429021	0.586589	0.131144	Plants	0.157568	True
43180	normal	normal	AMBTC	U5D9L1	W1P8H7	SELML	D8RKU6	-1	1	1	1	-1	1	0.728717	0.594538	0.39134	Plants	-0.134179	True
43180	normal	normal	AMBTC	U5D462	U5D198	SELML	D8T083	1	1	-1	1	-1	1	0.99414	0.934434	0.233542	Plants	-0.059706	True
43184	normal	normal	AMBTC	W1P0M7	U5CWC8	SELML	D8T4P0	1	1	-1	1	-1	1	0.366127	0.418848	0.369506	Plants	0.0527218	True
43184	normal	normal	AMBTC	W1P0M7	W1NTE9	SELML	D8T4P0	1	1	-1	1	-1	1	0.366127	0.471061	0.369506	Plants	0.104935	True
43205	normal	normal	AMBTC	U5D3N7	U5D3N3	SELML	D8QQE3	-1	1	1	1	-1	1	0.297927	0.447943	0.501056	Plants	0.150017	True
43205	normal	normal	AMBTC	U5D3N7	W1NYG3	SELML	D8QQE3	-1	1	1	1	-1	1	0.297927	0.297105	0.501056	Plants	-0.000821849	True
43205	normal	normal	AMBTC	U5D3N7	U5DI24	SELML	D8QQE3	-1	1	1	1	-1	1	0.297927	0.980414	0.501056	Plants	0.682487	True
43207	normal	normal	AMBTC	U5DAW0	W1PZP8	SELML	D8RKD9	-1	1	1	1	-1	1	0.490142	0.683146	0.0681174	Plants	0.193003	True
43220	normal	normal	AMBTC	W1NU94	W1PF10	SELML	D8RDC6	-1	1	-1	1	1	1	0.260152	0.291705	0.0754284	Plants	0.0315529	True
43243	normal	normal	AMBTC	W1NWX9	W1PVC0	SELML	D8SVB4	-1	1	-1	1	1	1	0.393691	0.526892	0.604968	Plants	0.133201	True
43243	normal	normal	AMBTC	W1NWX9	W1NVB0	SELML	D8SVB4	-1	1	-1	1	1	1	0.393691	0.407688	0.604968	Plants	0.0139975	True
43243	normal	normal	AMBTC	W1NTT3	W1P0A9	SELML	D8RQZ8	1	1	1	1	1	1	0.868733	0.954507	0.241118	Plants	0.0857745	True
43272	normal	normal	AMBTC	W1PKP5	U5D0S9	SELML	D8RNG6	-1	1	-1	1	1	1	0.42099	0.406385	0.189901	Plants	-0.0146054	True
43272	normal	normal	AMBTC	W1PPY7	W1P871	SELML	D8RRN3	-1	1	1	1	-1	1	0.235	0.52966	0.0800517	Plants	0.29466	True
43272	normal	normal	AMBTC	W1PPY7	U5D5Z6	SELML	D8RRN3	-1	1	1	1	-1	1	0.235	0.504156	0.0800517	Plants	0.269157	True
43281	normal	normal	AMBTC	U5CYN4	W1NM36	SELML	D8RDK9	-1	1	-1	1	1	1	0.944717	0.442293	0.208769	Plants	-0.502424	True
43281	normal	normal	AMBTC	U5CYN4	U5D5S7	SELML	D8RDK9	-1	1	-1	1	1	1	0.944717	0.333289	0.208769	Plants	-0.611428	True
43317	normal	normal	AMBTC	W1NTI5	W1PU59	SELML	D8SJ39	1	1	1	1	1	1	0.61774	0.472841	0.127244	Plants	-0.144899	True
43322	normal	normal	AMBTC	U5D5Y0	U5CSZ9	SELML	D8SMR7	1	1	1	1	1	1	0.537062	0.36695	0.171144	Plants	-0.170112	True
43327	normal	normal	AMBTC	W1P794	W1P7Z8	SELML	D8QTH7	-1	1	-1	1	1	1	0.198264	0.114025	0.144207	Plants	-0.0842393	True
43329	normal	normal	AMBTC	W1P2N7	W1NHH8	SELML	D8S8R8	1	1	1	1	1	1	0.530494	0.349057	0.28005	Plants	-0.181437	True
43337	normal	normal	AMBTC	W1P6A3	W1PBM4	SELML	D8SVM2	-1	1	1	1	-1	1	0.577271	0.930293	0.649399	Plants	0.353022	True
43349	normal	normal	AMBTC	W1NGW3	W1NK33	SELML	D8SZ88	-1	1	-1	1	1	1	0.317565	0.446226	0.111146	Plants	0.128662	True
43349	normal	normal	AMBTC	W1NGW3	U5DGP7	SELML	D8SZ88	1	1	-1	1	-1	1	0.317565	0.904316	0.111146	Plants	0.586752	True
43358	normal	normal	AMBTC	W1PY40	U5D0E9	SELML	D8RC32	1	1	-1	1	-1	1	0.287717	0.168054	0.126591	Plants	-0.119664	True
43447	normal	normal	AMBTC	W1NWG9	W1P9X6	SELML	D8T706	1	1	1	1	1	1	0.539057	0.523658	0.184867	Plants	-0.0153993	True
43523	normal	normal	AMBTC	W1NHI8	W1P6D0	SELML	D8RB04	1	1	1	1	1	1	0.608404	0.503749	0.584277	Plants	-0.104655	True
43570	normal	normal	AMBTC	W1PM74	W1NMQ2	SELML	D8R4U1	1	1	-1	1	-1	1	0.280779	0.558344	0.178252	Plants	0.277564	True
43574	normal	normal	AMBTC	W1NZ14	W1PS44	SELML	D8QSQ1	1	1	1	1	1	1	0.506698	0.489229	0.072387	Plants	-0.0174693	True
43591	normal	normal	AMBTC	U5CMA9	W1NFE6	SELML	D8SZB2	-1	1	1	1	-1	1	0.416552	0.816655	0.365186	Plants	0.400103	True
43601	normal	normal	AMBTC	U5DEH8	W1NNB4	SELML	D8S6D9	1	1	-1	1	-1	1	0.214428	0.307508	0.0467388	Plants	0.0930803	True
43601	normal	normal	AMBTC	U5DEH8	W1NGB7	SELML	D8S6D9	-1	1	-1	1	1	1	0.214428	0.435082	0.0467388	Plants	0.220654	True
43620	normal	normal	AMBTC	U5CY76	W1NRQ6	SELML	D8RRS4	1	1	1	1	1	1	0.417481	0.690524	0.123006	Plants	0.273043	True
43650	normal	normal	AMBTC	W1NSZ0	W1PW30	SELML	D8S5A3	1	1	1	1	1	1	0.544582	0.224925	0.060323	Plants	-0.319657	True
43706	normal	normal	AMBTC	W1P6X1	W1PCD1	SELML	D8RHS3	-1	1	1	1	-1	1	0.442608	0.303722	0.115372	Plants	-0.138885	True
43719	normal	normal	AMBTC	W1PSE7	W1PQ59	SELML	D8R9F4	-1	1	1	1	-1	1	0.475728	0.482992	0.16786	Plants	0.00726402	True
43719	normal	normal	AMBTC	W1P5B9	U5D5L8	SELML	D8T691	-1	1	1	1	-1	1	0.415788	0.460396	0.0545191	Plants	0.0446087	True
43719	normal	normal	AMBTC	W1P5B9	W1P3C8	SELML	D8T691	-1	1	1	1	-1	1	0.415788	0.516721	0.0545191	Plants	0.100933	True
43725	normal	normal	AMBTC	W1PTA5	U5D116	SELML	D8QXF9	-1	1	-1	1	1	1	0.295841	0.298188	0.26738	Plants	0.00234669	True
43748	normal	normal	AMBTC	W1NV73	W1NXJ9	SELML	D8QNW8	-1	1	1	1	-1	1	0.460699	0.326298	0.216925	Plants	-0.134401	True
43768	normal	normal	AMBTC	W1NGB3	W1P022	SELML	D8RYS7	-1	1	-1	1	1	1	0.395976	0.665782	0.193064	Plants	0.269806	True
43795	normal	normal	AMBTC	U5D729	U5DAG2	SELML	D8QN04	-1	1	-1	1	1	1	0.891038	0.331429	0.17532	Plants	-0.55961	True
43795	normal	normal	AMBTC	U5D729	U5D524	SELML	D8QN04			-1	1			0.891038		0.17532	Plants		True
43795	normal	normal	AMBTC	U5D729	W1NL81	SELML	D8QN04	1	1	-1	1	-1	1	0.891038	0.763572	0.17532	Plants	-0.127467	True
43840	normal	normal	AMBTC	U5DFE9	W1P7P5	SELML	D8RPT1	1	1	-1	1	-1	1	0.473716	0.814378	0.238764	Plants	0.340662	True
43874	normal	normal	AMBTC	W1PN71	U5D7A3	SELML	D8RMM4	1	1	1	1	1	1	0.742896	0.469231	0.218293	Plants	-0.273664	True
43874	normal	normal	AMBTC	W1NJM4	W1NMT9	SELML	D8RPM9	1	1	-1	1	-1	1	0.381833	0.344762	0.342951	Plants	-0.0370719	True
43874	normal	normal	AMBTC	U5D3J9	W1PVR0	SELML	D8RSA6	-1	1	1	1	-1	1	0.443474	0.306704	0.106983	Plants	-0.13677	True
43880	normal	normal	AMBTC	U5DEP8	W1PSL0	SELML	D8RBV6	1	1	1	1	1	1	0.622859	0.421476	0.360486	Plants	-0.201383	True
43880	normal	normal	AMBTC	W1NTK8	W1NJR8	SELML	D8T7E5	-1	1	-1	1	1	1	0.444316	0.744753	0.247281	Plants	0.300438	True
43880	normal	normal	AMBTC	W1NTK8	W1NR86	SELML	D8T7E5	1	1	-1	1	-1	1	0.444316	0.30593	0.247281	Plants	-0.138386	True
43900	normal	normal	AMBTC	W1NM30	U5CPA0	SELML	D8R0M0	-1	1	-1	1	1	1	0.477556	0.598852	0.104611	Plants	0.121296	True
43908	normal	normal	AMBTC	W1NYJ4	W1P3V9	SELML	D8R8P5	1	1	-1	1	-1	1	0.160286	0.268096	0.0743379	Plants	0.107809	True
43991	normal	normal	AMBTC	W1NG89	U5DA17	SELML	D8S0Q8	-1	1	-1	1	1	1	0.266834	0.262427	0.0837785	Plants	-0.00440715	True
44067	normal	normal	AMBTC	W1PAY5	U5D3H7	SELML	D8T5G7	1	1	1	1	1	1	0.701996	0.803748	0.163653	Plants	0.101752	True
44067	normal	normal	AMBTC	W1PAY5	U5D6L0	SELML	D8T5G7	1	1	1	1	1	1	0.701996	0.845441	0.163653	Plants	0.143445	True
44067	normal	normal	AMBTC	W1NEK1	W1NWZ1	SELML	D8RPP1	1	1	1	1	1	1	0.741748	0.817068	0.0905387	Plants	0.0753195	True
44083	normal	normal	AMBTC	U5D326	W1P5L4	SELML	D8R884	-1	1	-1	1	1	1	0.295527	0.336987	0.0822002	Plants	0.0414599	True
44083	normal	normal	AMBTC	U5D326	U5CZK9	SELML	D8R884	1	1	-1	1	-1	1	0.295527	0.386518	0.0822002	Plants	0.090991	True
44094	normal	normal	AMBTC	W1PPW3	W1PUU6	SELML	D8RAF2	-1	1	1	1	-1	1	0.30511	0.176251	0.0781437	Plants	-0.128859	True
44102	normal	normal	AMBTC	W1P6I5	W1P4E9	SELML	D8SU21	1	1	-1	1	-1	1	0.313374	0.600659	0.299661	Plants	0.287285	True
44102	normal	normal	AMBTC	W1P6I5	U5CZW8	SELML	D8SU21	1	1	-1	1	-1	1	0.313374	0.420769	0.299661	Plants	0.107395	True
44137	normal	normal	AMBTC	W1PTJ5	W1PRH3	SELML	D8S3I4	-1	1	-1	1	1	1	0.376922	0.258438	0.0981744	Plants	-0.118484	True
44191	normal	normal	AMBTC	W1NY23	W1NQ50	SELML	D8T2J1	-1	1	-1	1	1	1	0.396057	0.276923	0.228157	Plants	-0.119135	True
44203	normal	normal	AMBTC	W1NR05	W1P1J5	SELML	D8STQ8	1	1	-1	1	-1	1	0.50625	0.454574	0.0509876	Plants	-0.0516755	True
44218	normal	normal	AMBTC	W1P477	U5DD77	SELML	D8SMD4	1	1	1	1	1	1	0.398295	0.488676	0.145525	Plants	0.0903817	True
44240	normal	normal	AMBTC	U5DA78	W1PZA5	SELML	D8RT41	1	1	-1	1	-1	1	0.481427	0.449608	0.124634	Plants	-0.0318182	True
44272	normal	normal	AMBTC	W1PAH0	W1NY24	SELML	D8SU60	1	1	1	1	1	1	0.277387	0.282323	0.0373797	Plants	0.00493642	True
44329	normal	normal	AMBTC	W1PYV6	U5CW63	SELML	D8T748	-1	1	1	1	-1	1	0.251601	0.390083	0.033276	Plants	0.138482	True
44329	normal	normal	AMBTC	W1PVV5	U5DFJ1	SELML	D8SHP2	-1	1	1	1	-1	1	0.514339	0.463565	0.0932934	Plants	-0.0507743	True
44329	normal	normal	AMBTC	W1NVA0	W1P9P3	SELML	D8S7W1	1	1	1	1	1	1	0.283225	0.233818	0.0574483	Plants	-0.0494076	True
44376	normal	normal	AMBTC	W1NPR1	U5DBU8	SELML	D8REX6	-1	1	1	1	-1	1	0.423039	0.219971	0.14065	Plants	-0.203068	True
44420	normal	normal	AMBTC	W1PD97	W1NEB6	SELML	D8S946	-1	1	-1	1	1	1	0.198723	0.404652	0.131954	Plants	0.205929	True
44573	normal	normal	AMBTC	W1P9R2	U5DGA3	SELML	D8RIU6	1	1	1	1	1	1	0.674561	0.50773	0.453636	Plants	-0.166831	True
44743	normal	normal	AMBTC	W1P5B1	W1PC41	SELML	D8T1G9	-1	1	-1	1	1	1	0.262963	0.299803	0.099479	Plants	0.0368394	True
45085	normal	normal	AMBTC	W1PUL5	W1PZ13	SELML	D8SGD7	1	1	1	1	1	1	0.721895	0.383532	0.0540593	Plants	-0.338363	True
45290	normal	normal	AMBTC	W1P6C2	W1PJC5	SELML	D8TEC1	1	1	1	1	1	1	0.506923	0.452087	0.0856745	Plants	-0.0548356	True
45614	normal	normal	AMBTC	W1PIN3	W1NSE3	SELML	D8RJ77	-1	1	1	1	-1	1	0.381292	0.532307	0.029518	Plants	0.151015	True
45621	normal	normal	AMBTC	W1PJG2	W1NH81	SELML	D8RSW9	1	1	1	1	1	1	0.421095	0.329805	0.0498748	Plants	-0.09129	True
45621	normal	normal	AMBTC	W1P784	U5CZW2	SELML	D8QXA8	1	1	-1	1	-1	1	0.338264	0.929148	0.0637503	Plants	0.590883	True
45621	normal	normal	AMBTC	W1P784	W1P386	SELML	D8QXA8	-1	1	-1	1	1	1	0.338264	0.397173	0.0637503	Plants	0.058909	True
45621	normal	normal	AMBTC	W1P784	W1NF08	SELML	D8QXA8	-1	1	-1	1	1	1	0.338264	0.76174	0.0637503	Plants	0.423476	True
45621	normal	normal	AMBTC	W1P784	W1PX94	SELML	D8QXA8	1	1	-1	1	-1	1	0.338264	0.267209	0.0637503	Plants	-0.071055	True
45621	normal	normal	AMBTC	W1P784	W1NGQ1	SELML	D8QXA8	1	1	-1	1	-1	1	0.338264	0.442763	0.0637503	Plants	0.104499	True
45621	normal	normal	AMBTC	W1P784	U5CV65	SELML	D8QXA8	1	1	-1	1	-1	1	0.338264	0.260177	0.0637503	Plants	-0.078087	True
45621	normal	normal	AMBTC	W1P784	W1PD76	SELML	D8QXA8	1	1	-1	1	-1	1	0.338264	0.250703	0.0637503	Plants	-0.087561	True
45621	normal	normal	AMBTC	W1P784	W1NDU5	SELML	D8QXA8	1	1	-1	1	-1	1	0.338264	0.539747	0.0637503	Plants	0.201483	True
45621	normal	normal	AMBTC	W1P784	W1PTC1	SELML	D8QXA8	1	1	-1	1	-1	1	0.338264	0.690844	0.0637503	Plants	0.35258	True
45626	normal	normal	AMBTC	W1NHF0	W1PYR3	SELML	D8SJR4	1	1	-1	1	-1	1	0.737965	0.582361	0.144874	Plants	-0.155604	True
45633	normal	normal	AMBTC	W1NI34	U5DBV1	SELML	D8RRA0	1	1	1	1	1	1	0.450609	0.517252	0.0661242	Plants	0.0666433	True
45633	normal	normal	AMBTC	W1NYM6	W1PDP1	SELML	D8SG19	1	1	1	1	1	1	0.379659	0.704348	0.106251	Plants	0.324689	True
45635	normal	normal	AMBTC	U5D2Q5	W1P2M3	SELML	D8R367	-1	1	1	1	-1	1	0.0992881	0.558608	0.112499	Plants	0.45932	True
45637	normal	normal	AMBTC	W1Q0W4	U5DGE8	SELML	D8RT06	-1	1	-1	1	1	1	0.401362	0.801036	0.119687	Plants	0.399674	True
45637	normal	normal	AMBTC	W1Q0W4	W1NZX1	SELML	D8RT06	1	1	-1	1	-1	1	0.401362	0.486307	0.119687	Plants	0.084945	True
[truncated: 228,937+ more rows]
