# Supplementary figures and images for: Unveiling the functional fate of duplicated genes through expression profiling and structural analysis
Source: HighWire-hosted journal article supplement (doi:10.1101/gr.280166.124), 2025-08-14

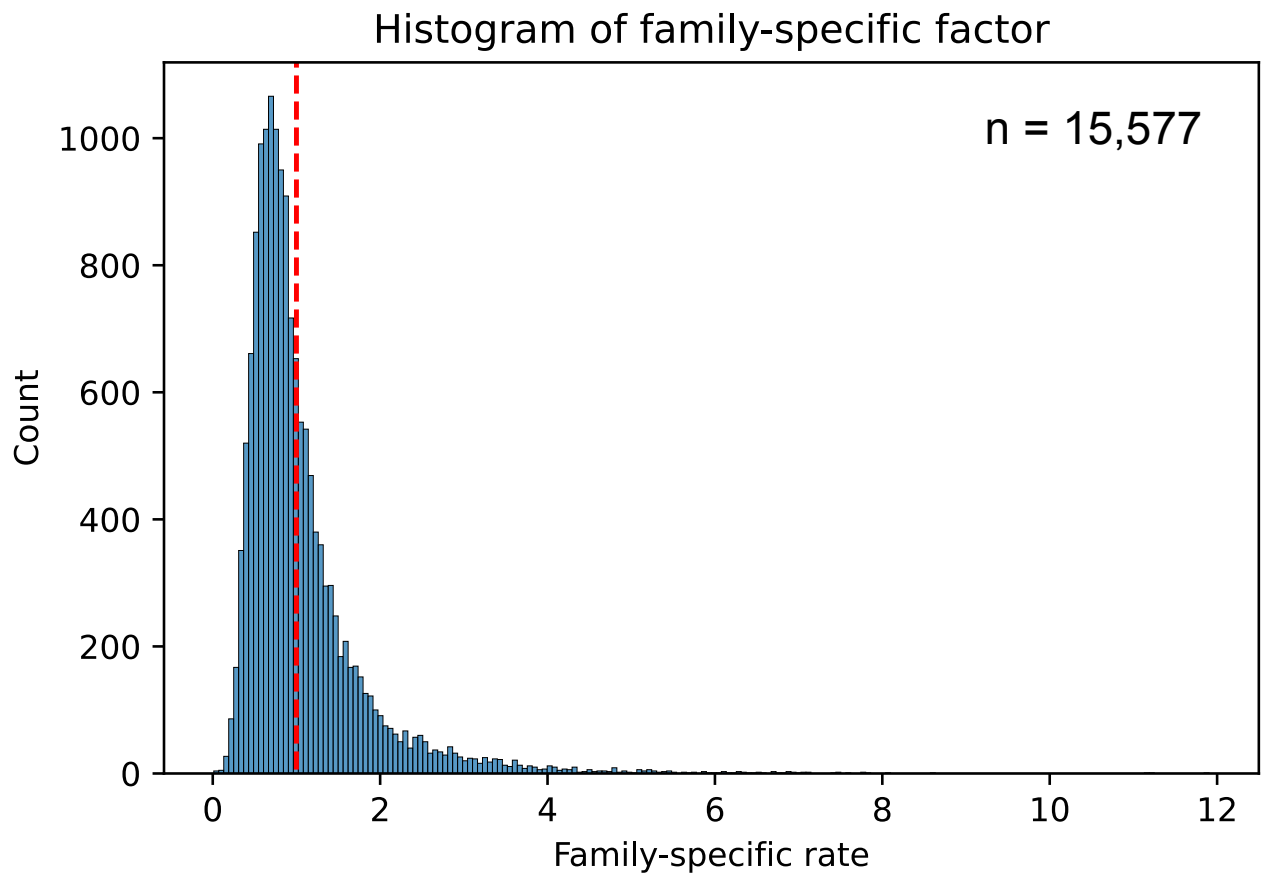

**Supplemental Fig. S1.** Histogram showing the distribution of the family-specific factor values.

Supplement: Supplemental_Fig_S1.pdf [file Supplemental_Fig_S1.pdf]
